# Supplementary material for: Cancer cells impede T cell early activation and drive immune evasion by transferring Tmem176b
Source: Research Square preprint supplement (doi:10.21203/rs.3.rs-6199894/v1), 2025-07-07
Supplement: Supplementary file 1 [file Supplementary Table_1_h-m cancer cell-exosome MS.xlsx]

## Sheet: human cell lines exo
Protein.Group	Protein.Ids	Protein.Names	Genes	EA549-1	EA549-2	Esw480-1	Esw480-2	EBEAS-1	EBEAS-2	Ehela-1	Ehela-2	EMCF-1	EMCF-2
P68366	P68363;P68366;Q71U36;Q9BQE3;A6NHL2	TBA4A_HUMAN	TUBA4A	3194810	3173460	1533850	1543400	3048130	2855280	2836340	2970970	2685110	2201010
P04350	P04350;P07437;P68371	TBB4A_HUMAN	TUBB4A	2613180	2672020	1724720	1784410	2550730	2660910	2555740	2817820	1708070	1867620
P02751	P02751	FINC_HUMAN	FN1	2526540	2586480	313486	330916	5481110	5293400	822290	815965	1241200	1333500
Q9BQE3	P0DPH7;P0DPH8;Q6PEY2;Q71U36;Q9BQE3;Q9NY65	TBA1C_HUMAN	TUBA1C	2446310	2334750	1367570	1388020	2345200	2162320	2216590	2456370	2208590	2122010
Q9H4B7	Q9H4B7	TBB1_HUMAN	TUBB1	2338050	2478850	871247	1008140	2376030	2314510	2228370	2282520	1412940	1405200
P01023	P01023	A2MG_HUMAN	A2M	2224970	2240420	762838	825413	2361900	2356550	1972420	2099950	2959140	2557900
P69905	P69905	HBA_HUMAN	HBA2	1749240	1823790	650091	676345	2061200	1729650	1425720	1641960	944178	916595
P02768	P02768	ALBU_HUMAN	ALB	1615140	1601690	442466	446826	1601750	1185100	1590200	2321980	610952	645423
P63261	P60709;P63261	ACTG_HUMAN	ACTG1	1571540	1565860	1062580	1041090	1494350	1445930	1605190	1548970	1735310	1551010
P35908	P35908	K22E_HUMAN	KRT2	1551530	1852020	1147750	1278520	1150450	697849	4977420	4630850	97878.8	111590
P04264	P04264	K2C1_HUMAN	KRT1	1453320	2103250	1466070	1221060	1531170	784367	5790330	8134550	165318	318910
P07996	P07996	TSP1_HUMAN	THBS1	1400630	1484640	559855	565951	5545120	5341680	389547	382539	2433660	2756440
P02765	P02765	FETUA_HUMAN	AHSG	1382630	1245770	371937	327914	1458440	1401740	776933	749201	1606990	1470060
P02649	P02649	APOE_HUMAN	APOE	1368350	1142890	755434	928341	2979150	2554480	1874010	2233580	940509	864002
P01024	P01024	CO3_HUMAN	C3	1294670	1258150	456219	482223	999755	965562	688673	654083	1387000	1469710
P02774	P02774	VTDB_HUMAN	GC	1285750	1175100	437823	521179	1137310	1084860	912655	903723	1106410	826319
P12259	P12259	FA5_HUMAN	F5	1252910	1322730	644604	687308	1488070	1614720	1025610	1057010	1316380	1445840
P02675	P02675	FIBB_HUMAN	FGB	1227950	1343620	414710	489816	1372620	1404430	816762	1052630	810451	1025670
P08697	P08697	A2AP_HUMAN	SERPINF2	1176660	1139720	436727	420705	1461890	1349080	1161210	1120050	57815.4	56407.3
O00560	O00560	SDCB1_HUMAN	SDCBP	1169770	1101490	496964	449470	199618	207310	739879	655711	873700	750373
Q9Y490	Q9Y490	TLN1_HUMAN	TLN1	1084660	1058800	606687	619659	1145790	1107120	908809	866744	842282	817460
P04004	P04004	VTNC_HUMAN	VTN	1073930	1178050	795856	768071	1475740	1433840	1515360	1702610	1363830	1111460
P13645	P13645	K1C10_HUMAN	KRT10	1065690	1316560	1161860	805662	840820	780315	3317120	3506210	76011.4	93708
P00734	P00734	THRB_HUMAN	F2	1017420	1113670	561770	704170	1314370	1213440	660050	786749	976506	1111330
Q13418	Q13418	ILK_HUMAN	ILK	992948	992814	542377	566133	1018430	1000390	997669	1079880	577707	603147
Q08380	Q08380	LG3BP_HUMAN	LGALS3BP	978803	976926	542531	566765	630714	589631	948011	916103	301293	322414
P19823	P19823	ITIH2_HUMAN	ITIH2	971313	971205	337735	386835	1074130	1020340	735309	875222	310609	426790
P02771	P02771	FETA_HUMAN	AFP	969394	971696	174571	132205	885973	754394	911046	815648	388047	307984
P23142	P23142	FBLN1_HUMAN	FBLN1	944240	910692	393817	460626	1079630	1154860	864542	876882	530305	623006
P02788	P02788	TRFL_HUMAN	LTF	917063	918310	252989	285317	372337	570493	1021810	1175170	324094	329923
P07437	P07437	TBB5_HUMAN	TUBB	880756	1012600	619973	660834	931085	1019200	779956	1037000	706311	770026
P39060	P39060	COIA1_HUMAN	COL18A1	862973	950264	242669	247764	164322	168355	44241.2	44786.6
P11142	P11142;P54652	HSP7C_HUMAN	HSPA8	860329	810024	629174	611702	491305	496064	1293330	1247490	673157	606477
Q96A33	Q96A33	CCD47_HUMAN	CCDC47	853774	759437	28977.1	37488.3	1472520	2072980	591787	1467910	220562	297274
P61224	P61224;P62834	RAP1B_HUMAN	RAP1B	853255	845499	490843	515321	513146	492511	1020740	1019930	632876	553389
P98160	P98160	PGBM_HUMAN	HSPG2	851566	867935	86265.2	90176.9	1733240	1633560	809778	806802	212013	216151
P04114	P04114	APOB_HUMAN	APOB	846976	822228	516740	619952	701220	734077	448476	508294	594110	668548
P02679	P02679	FIBG_HUMAN	FGG	806681	769712	304178	344557	1235870	1108380	499455	500742	893883	837426
P00488	P00488	F13A_HUMAN	F13A1	778265	824420	440987	442331	1016960	1028950	639094	618564	677045	703718
P02748	P02748	CO9_HUMAN	C9	761570	789629	304930	324768	478117	510997	645284	589181	579815	588667
P05106	P05106	ITB3_HUMAN	ITGB3	742650	772519	417714	447071	298909	310376	1052010	1067250	416935	404797
P00742	P00742	FA10_HUMAN	F10	714081	754754	179123	204590	484790	461753	813858	833005	594291	550965
P01031	P01031	CO5_HUMAN	C5	700867	731464	282196	384663	762059	727258	336025	432317	226192	279733
P35579	P35579	MYH9_HUMAN	MYH9	699711	684802	368388	339463	945592	914742	736286	685788	752881	678791
P01008	P01008	ANT3_HUMAN	SERPINC1	691344	761659	142718	198365	861901	881715	417113	472539	557668	625256
P62979	P62979	RS27A_HUMAN	RPS27A	689502	643381	365817	372542	507563	433725	593487	617925	687474	723170
Q15185	Q15185	TEBP_HUMAN	PTGES3	679294	739732	128097	140577	405135	360751	236767	229046	138833	106788
P62826	P62826	RAN_HUMAN	RAN	659380	598740	650416	630361	602971	585159	640590	637819	894831	797841
P23526	P23526	SAHH_HUMAN	AHCY	640999	648891	536701	575067	610623	580584	557828	616684	702222	734349
P68871	P02042;P68871	HBB_HUMAN	HBB	628328	590135	274840	309803	698278	601087	410913	576794	171203	233360
P00747	P00747	PLMN_HUMAN	PLG	624825	611320	251715	277872	555402	493009	380264	383432	570360	630747
P18085	P18085	ARF4_HUMAN	ARF4	619958	591519	398089	475133	735290	760144	530133	528868	498547	567421
P14618	P14618	KPYM_HUMAN	PKM	609402	623711	699650	684766	577605	508604	608154	581791	613518	573501
P35527	P35527	K1C9_HUMAN	KRT9	591344	1210310	507647	670721	915691	51937.9	3163560	5096440	81030	242054
P0C0L4	P0C0L4;P0C0L5	CO4A_HUMAN	C4A	581948	532127	712855	704850	459452	523716	397510	411014	339294	390576
Q15582	Q15582	BGH3_HUMAN	TGFBI	575125	573177	103099	111147	1132060	1139880	87009.6	85207.2	2677300	2862370
P02749	P02749	APOH_HUMAN	APOH	558494	674208	282261	300468	462285	563861	513200	502952	372478	433407
P13224	P13224	GP1BB_HUMAN	GP1BB	543300	506444	244155	244065	165187	185872	883907	726062	49866	51266.6
Q86UX7	Q86UX7	URP2_HUMAN	FERMT3	533148	561110	330690	327756	560133	552255	501825	522135	486536	501270
P02647	P02647	APOA1_HUMAN	APOA1	524979	485761	166751	173364	857428	807542	365877	439176	474290	615258
P62258	P62258	1433E_HUMAN	YWHAE	518315	552380	573823	559274	360213	360105	731854	755815	350890	360280
P81605	P81605	DCD_HUMAN	DCD	509424	532638	203427	215252	115903	63467.2	738147	1031820	12036	8965.38
P62805	P62805	H4_HUMAN	H4-16	508010	551130	1716790	1463520	256487	238312	302180	279372	867717	593983
P06396	P06396	GELS_HUMAN	GSN	500563	488072	222711	226382	527611	532102	362324	367669	503247	509487
Q9H853	Q9H853	TBA4B_HUMAN	TUBA4B	488673	558590	220327	209505	590300	562072	458716	481152	534802	527552
P0DMV8;P0DMV9	P0DMV8;P0DMV9	HS71A_HUMAN;HS71B_HUMAN	HSPA1A;HSPA1B	485314	478935	267252	248066	347948	347962	982322	893011	211877	235540
P06733	P06733	ENOA_HUMAN	ENO1	477073	444409	487991	437653	357584	343743	798932	754799	306645	286215
P07355	A6NMY6;P07355	ANXA2_HUMAN	ANXA2	450093	445848	809290	769682	158913	157557	379624	413664	287861	276194
Q15366	P57721;Q15366	PCBP2_HUMAN	PCBP2	445978	491084	113310	118204	100113	92523.3	122203	117709	81219.1	126714
P05156	P05156	CFAI_HUMAN	CFI	443055	470905	297205	354241	398719	419308	223510	264604	286974	244768
O00468	O00468	AGRIN_HUMAN	AGRN	433656	419459	280338	322155	379909	368666	260805	262342	294785	311172
P63104	P63104	1433Z_HUMAN	YWHAZ	427451	424741	341600	329558	215215	202734	589240	597096	296134	263306
P68104	P68104;Q5VTE0	EF1A1_HUMAN	EEF1A1	422556	404322	473719	431180	400475	385689	586022	568247	712196	705055
Q9NZN3	Q9NZN3	EHD3_HUMAN	EHD3	419045	409681	237870	243013	414645	334847	441732	349166	359407	344159
O75340	O75340	PDCD6_HUMAN	PDCD6	411956	425846	632523	685364	77331.5	69485.2	1185150	1175750	47552.9	38213.5
P00966	P00966	ASSY_HUMAN	ASS1	411875	380930	178472	218323	457847	432012	349954	396817	346844	381848
Q9Y5T5	Q9Y5T5	UBP16_HUMAN	USP16	398416	273042	231628	234429	138717	149370	236457	218223	307741	316255
P12109	P12109	CO6A1_HUMAN	COL6A1	392989	410140	127332	153253	548260	608859	424888	382920	198123	180305
P21333	P21333	FLNA_HUMAN	FLNA	392953	409050	310909	325718	311710	298110	454291	421411	255704	270854
P04406	P04406	G3P_HUMAN	GAPDH	392776	354386	836578	732022	235091	251972	826807	789772	443259	410167
O60218	O60218	AK1BA_HUMAN	AKR1B10	391015	367230	28483.6	38960.2	197315	221364	132453	136738	129146	88756.2
Q13885	Q13885;Q9BVA1	TBB2A_HUMAN	TUBB2A	388983	391526	321496	319277	384736	372510	378924	372477	283744	299321
P11166	P11166	GTR1_HUMAN	SLC2A1	384705	369582	1431230	1732790	211999	205139	433479	407467	94170.9	100296
P62937	P62937	PPIA_HUMAN	PPIA	380699	385209	304578	295435	262725	233614	529378	501464	246457	226496
Q14451	Q14451	GRB7_HUMAN	GRB7	379190	613329	240683	222171	450004	335038	793779	631692	135669	165720
P00558	P00558	PGK1_HUMAN	PGK1	368399	361335	252994	259519	390259	365189	353913	328656	202058	204138
P16070	P16070	CD44_HUMAN	CD44	365451	295206	140580	149916	121128	129161	289242	345467	93138	106268
P07195	P07195	LDHB_HUMAN	LDHB	363492	383140	295169	295924	346736	347661	519211	555014	158899	150553
P08195	P08195	4F2_HUMAN	SLC3A2	348010	324040	457795	516666	88885.2	93728	1072750	977742	149267	151924
Q06033	Q06033	ITIH3_HUMAN	ITIH3	347093	366202	118827	117447	313009	329968	255872	239379	283444	273558
P04899	P04899	GNAI2_HUMAN	GNAI2	343690	323863	309160	323312	186472	169464	581384	608505	171621	168603
P05556	P05556	ITB1_HUMAN	ITGB1	335281	354331	132624	153325	143890	147139	173573	186444	180953	188475
P51148	P20339;P51148;P61020	RAB5C_HUMAN	RAB5C	331568	315727	190446	192851	206679	201349	414208	404045	145552	139795
Q15907	P62491;Q15907	RB11B_HUMAN	RAB11B	324679	338947	170528	199919	277368	261280	297615	390719	174505	187661
Q8WUM4	Q8WUM4	PDC6I_HUMAN	PDCD6IP	323970	308810	254755	264395	113633	110681	242168	235888	349449	327609
P05787	P05787	K2C8_HUMAN	KRT8	322849	319535	511926	503496	49274.8	41883.8	103656	103727	93885.7	94709.6
P68371	P68371	TBB4B_HUMAN	TUBB4B	319001	352232	151937	104813	414220	380110	447950	341601	4456.11	4573.94
Q00610	P53675;Q00610	CLH1_HUMAN	CLTC	317726	314315	458709	486070	277774	267843	644756	632270	292878	323681
Q13103	Q13103	SPP24_HUMAN	SPP2	315178	398271	63366.6	57512.2	749277	686661	237641	214685
P00338	P00338	LDHA_HUMAN	LDHA	309653	284342	349567	363818	140940	133738	373208	396641	123947	129634
P48740	P48740	MASP1_HUMAN	MASP1	309517	308184	120758	134876	347402	272312	212514	236296	125643	132906
P13639	P13639	EF2_HUMAN	EEF2	309404	266106	209440	207463	186850	180348	303902	301954	252777	259063
O95084	O95084	PRS23_HUMAN	PRSS23	306995	297292	30586.1	35904.8	87126.4	95419.4	194433	161708	29938.1	33138.9
P07942	P07942	LAMB1_HUMAN	LAMB1	306238	318047	50910.5	55247	129395	122982	288260	272194	246420	259027
O95445	O95445	APOM_HUMAN	APOM	304401	367746	109831	143096	549503	452930	118426	131180	463774	569320
Q8WUA8	Q8WUA8	TSK_HUMAN	TSKU	303692	297614	11756.7	11063.2	5241.64	7858.52	39502	42803.7	64919.4	78331.5
P08567	P08567	PLEK_HUMAN	PLEK	303415	286014	100109	93165.6	115703	101001	149437	131465	115285	103984
P00738	P00738	HPT_HUMAN	HP	300284	238617	81024.6	76552.3	235628	232740	380560	392231	191087	238918
P07225	P07225	PROS_HUMAN	PROS1	300127	275346	50421.5	40429.1	259825	258020	194773	192302	111580	124176
Q14624	Q14624	ITIH4_HUMAN	ITIH4	297773	318810	73276.6	98444.8	555090	500458	257693	240791	16024	16306.3
Q9NQX4	Q9NQX4	MYO5C_HUMAN	MYO5C	293013	257466	48725.8	53574.5	96907.8	103691	209678	285863	128412	140496
P08238	P07900;P08238;Q14568;Q58FF8	HS90B_HUMAN	HSP90AB1	292311	278955	381303	364014	212143	194851	413455	400027	311447	295914
P02753	P02753	RET4_HUMAN	RBP4	291174	287027	69904.5	70692.8	404878	324838	264207	245423	331522	273666
O60814;P57053;P58876;P62807;Q5QNW6;Q93079;Q99877;Q99879;Q99880	O60814;P06899;P23527;P33778;P57053;P58876;P62807;Q16778;Q5QNW6;Q8N257;Q93079;Q96A08;Q99877;Q99879;Q99880	H2B1C_HUMAN;H2B1D_HUMAN;H2B1H_HUMAN;H2B1K_HUMAN;H2B1L_HUMAN;H2B1M_HUMAN;H2B1N_HUMAN;H2B2F_HUMAN;H2BFS_HUMAN	H2BC10;H2BC12;H2BC12L;H2BC13;H2BC14;H2BC15;H2BC18;H2BC5;H2BC9	289643	298485	826937	654901	191002	167557	178312	183726	185338	186682
P48059	P48059	LIMS1_HUMAN	LIMS1	286381	281104	180927	199298	356946	336296	202981	218182	299722	298844
P12111	P12111	CO6A3_HUMAN	COL6A3	284880	279984	114366	111804	311499	323867	285385	269970	236962	244595
P02533	P02533	K1C14_HUMAN	KRT14	281619	424909	944084	240967	331906	90169.6	1283100	1760560	653913	613584
P02461	P02461	CO3A1_HUMAN	COL3A1	278086	276530	66641.4	73376.4	226029	253106	182493	152674	105773	113210
Q08431	Q08431	MFGM_HUMAN	MFGE8	276723	329316	135605	132540	126463	140942	316295	240490	252653	199680
P12110	P12110	CO6A2_HUMAN	COL6A2	276263	282135	98900.6	104450	344828	336114	299439	277116	307001	292182
Q14204	Q14204	DYHC1_HUMAN	DYNC1H1	276204	279019	249363	255406	285929	275471	233950	233483	271315	268680
P08758	P08758	ANXA5_HUMAN	ANXA5	275375	314405	205898	205423	148175	137749	503729	496217	119536	122588
P21399	P21399	ACOHC_HUMAN	ACO1	271026	272101	175906	180524	280027	262076	271628	260182	230439	239947
P50914	P50914	RL14_HUMAN	RPL14	262568	310237	214799	234494	229142	235565	290311	301154	19403.2	19001.3
Q07955	Q07955	SRSF1_HUMAN	SRSF1	259441	265878	97226.5	100171	368340	343510	228858	231331	61459.7	77141.8
P14543	P14543	NID1_HUMAN	NID1	257250	247084	50036.5	53248.4	230586	236189	199355	202199	133761	110799
P61204;P84077	P61204;P84077	ARF1_HUMAN;ARF3_HUMAN	ARF1;ARF3	255264	247736	140195	154959	257112	243196	212629	242148	221353	239484
P60842	P60842	IF4A1_HUMAN	EIF4A1	253294	267702	402096	400476	273006	256779	343953	340924	355624	339916
Q9H4M9	Q9H4M9;Q9NZN3	EHD1_HUMAN	EHD1	253054	247500	204268	202341	254846	239774	269534	268659	232077	231988
P08514	P08514	ITA2B_HUMAN	ITGA2B	252574	264150	102178	125934	91634	112524	285473	361627	37542.8	41953.2
O15230	O15230	LAMA5_HUMAN	LAMA5	251374	253889	35609.3	40719.5	38910	37639.3	126291	133966	124616	131791
P12273	P12273	PIP_HUMAN	PIP	250547	250056	59044.1	62533.7	65932	56538.6	260759	354925	9088.8	6192.5
P04083	P04083	ANXA1_HUMAN	ANXA1	250490	248968	180545	200364	96628.9	91088.9	150997	134579	398029	399885
P26006	P26006	ITA3_HUMAN	ITGA3	248340	242200	45745.3	57430.4	84238.6	92865.3	18239.5	21992.4	111489	133309
P42330	P42330	AK1C3_HUMAN	AKR1C3	248204	257601	25785	27973.3	110299	104822	53519.5	44021.6	41426.9	44578.1
P13647	P13647	K2C5_HUMAN	KRT5	247340	369562	676609	266546	243124	159489	858071	1091000	221661	218727
P11047	P11047	LAMC1_HUMAN	LAMC1	243559	239687	49464.6	55635.4	101848	101960	180617	192128	209513	212973
P51149	P51149	RAB7A_HUMAN	RAB7A	242580	240711	156219	183494	173771	186137	628355	592478	208968	228536
P22352	P22352	GPX3_HUMAN	GPX3	237104	204330	99598.1	96591.5	161251	175777	138461	148970	82425.1	72015.3
P46781	P46781	RS9_HUMAN	RPS9	233734	227418	317872	328357	228724	207589	312349	299996	294410	271721
Q92743	Q92743	HTRA1_HUMAN	HTRA1	231494	243305	33528.9	37902.9	190463	168246	410611	387180	111750	130603
P09429	P09429;P26583	HMGB1_HUMAN	HMGB1	230920	232471	33873.3	35620.3	62145.1	64100.8	92135.5	82064.4	7845.16	12713.7
P00736	P00736	C1R_HUMAN	C1R	229845	223044	12730.2	15687.6	159236	158669	34744.5	27402	94476.6	102686
P10909	P10909	CLUS_HUMAN	CLU	228541	236867	47045.9	48831.2	14221.8	13331.5	101355	89343.5	3536.79	4656.9
Q15365	Q15365	PCBP1_HUMAN	PCBP1	227747	223973	134147	144606	125999	136223	147496	151024	75531.6	119569
Q07020	Q07020	RL18_HUMAN	RPL18	226309	216365	137911	134047	182392	192654	218875	202353	127949	146566
P60953	P60953	CDC42_HUMAN	CDC42	225961	236002	145641	157702	187042	164450	306792	320334	119994	140661
P55072	P55072	TERA_HUMAN	VCP	225399	222987	126339	130836	55343.5	54555	242637	228975	169015	168434
P26038	P26038	MOES_HUMAN	MSN	224029	228806	237248	215353	129048	124164	398357	369310	154026	147563
P07358	P07358	CO8B_HUMAN	C8B	222271	212144	131805	141192	182819	175452	90793.2	93879	186775	267729
P62873	P62873	GBB1_HUMAN	GNB1	222211	237219	179716	196755	131525	127677	366262	301674	137489	122702
Q9UGM3	Q9UGM3	DMBT1_HUMAN	DMBT1	222076	224711	57567.8	79169.3	186646	238149	157142	180007	117880	113114
P02794	P02794	FRIH_HUMAN	FTH1	221805	233182	60895.7	71858.1	252199	220832	281332	311060	59922.3	59480
O14672	O14672	ADA10_HUMAN	ADAM10	221629	236811	110597	115536	69708.6	74171.3	105899	102959	167165	160699
P61586	P08134;P61586;P62745	RHOA_HUMAN	RHOA	220516	247441	165964	173919	162321	161832	259351	259877	134009	142369
P02100	P02100	HBE_HUMAN	HBE1	218334	226516	94079.4	125034	310046	338808	78250.8	101561	113785	112356
P63000	P15153;P60763;P63000	RAC1_HUMAN	RAC1	217353	218684	143437	155375	175573	163500	291268	300625	130171	112201
Q9Y4K0	Q9Y4K0	LOXL2_HUMAN	LOXL2	212181	200304	16891.5	16566.1	569319	524770	108018	114603	127882	126130
P27105	P27105	STOM_HUMAN	STOM	212050	216041	69205	77410.2	140413	136079	366080	396209	147579	141715
P23528	P23528;Q9Y281	COF1_HUMAN	CFL1	208521	217579	251189	236286	221569	207554	306343	295339	165335	157202
P07737	P07737	PROF1_HUMAN	PFN1	207801	214751	175100	171445	176228	185877	210291	225853	149424	151020
P52907	P47755;P52907	CAZA1_HUMAN	CAPZA1	207316	243604	140367	147201	278273	261616	151584	151442	240020	278564
P21926	P21926	CD9_HUMAN	CD9	205322	209604	470608	482038	36986.4	38862.1	202583	179119	353337	311006
P02760	P02760	AMBP_HUMAN	AMBP	205252	244187	38005.6	47009.7	283795	305379	131573	168535	123699	329619
P61026	P61026	RAB10_HUMAN	RAB10	202826	194494	139329	129028	89107.9	78722.9	288218	271501	146869	127536
P50995	P50995	ANX11_HUMAN	ANXA11	202786	193321	348729	380549	40910.1	45245.1	651920	621886	63958.6	51549.9
O75083	O75083	WDR1_HUMAN	WDR1	202666	197830	193906	191092	209840	188819	204342	197637	260195	248925
Q04756	Q04756	HGFA_HUMAN	HGFAC	201419	191269	58328.3	67498.4	255056	221470	140150	120413	111798	155768
P13929	P13929	ENOB_HUMAN	ENO3	198237	171807	89052.4	96902	196604	154440	134195	151868	39163.9	45710.9
P04217	P04217	A1BG_HUMAN	A1BG	197465	67132	3953.75	6206.04	52711.4	88718.1	155005	254305	4590.08	15003
Q96FS4	Q96FS4	SIPA1_HUMAN	SIPA1	194703	186620	36650.9	70894.9	346923	389952	119882	235513	167780	130103
P52209	P52209	6PGD_HUMAN	PGD	192449	192458	109201	117987	146824	148468	131046	124160	93782.2	114319
Q8NFJ5	Q8NFJ5	RAI3_HUMAN	GPRC5A	192167	218615	49899.8	48094.4	39554.1	36993.2	583137	509891	258817	283155
P05452	P05452	TETN_HUMAN	CLEC3B	191615	182325	88156.4	91859.7	161952	141847	109602	113332	144561	137601
Q16777;Q6FI13	P04908;P0C0S8;P20671;Q16777;Q6FI13;Q7L7L0;Q93077;Q96KK5;Q99878;Q9BTM1	H2A2A_HUMAN;H2A2C_HUMAN	H2AC19;H2AC20	191298	201497	1425860	1004780	72288	81815.8	122576	134241	334443	165710
P08123	P08123	CO1A2_HUMAN	COL1A2	190481	175941	61581.5	64535.3	137345	135442	143359	138304	125782	136744
P36955	P36955	PEDF_HUMAN	SERPINF1	189714	220433	73648.1	73108.2	173794	146322	127192	123011	152054	143284
P08572	P08572	CO4A2_HUMAN	COL4A2	184197	192614	9335.52	886.908	276250	273442	94372.7	96799.4	94379.9	98410.5
P36871	P36871	PGM1_HUMAN	PGM1	183633	175410	112429	104224	192391	224703	191660	183483	141369	149491
P43652	P43652	AFAM_HUMAN	AFM	183067	206928	37379.1	33332.2	203119	206264	102184	136141	183013	196415
P62241	P62241	RS8_HUMAN	RPS8	182434	189620	221596	220121	165791	165282	229862	236712	136843	167411
P11171	P11171;Q9H4G0;Q9Y2J2	EPB41_HUMAN	EPB41	181062	170946	119614	124437	100687	91536.4	255386	228260	114770	99785.9
P07948	P07948	LYN_HUMAN	LYN	181041	166897	88705.4	95782.7	64411.1	69933.9	223455	234218	52959.9	59114.8
P00740	P00740	FA9_HUMAN	F9	180965	402467	111704	104969	337088	298109	186732	179925	15114.7	86691.6
P35052	P35052	GPC1_HUMAN	GPC1	179829	181869	103305	109714	37945.1	38424.5	33277.7	36189.8	59801.1	50645.4
Q9Y2J4	Q9Y2J4	AMOL2_HUMAN	AMOTL2	179009	211092	62215.4	46592.3	178602	182842	108612	132338	51036.5	55299.7
P51884	P51884	LUM_HUMAN	LUM	178676	175232	21228	23992.5	237968	254697	87513.7	104883	25788.6	34524.2
P01591	P01591	IGJ_HUMAN	JCHAIN	176794	174796	80541.1	81143.4	111905	112435	142582	130999	91205.5	89694.3
Q15063	Q15063	POSTN_HUMAN	POSTN	175881	178035	81968.7	88714.3	300340	303186	115211	118018	191471	195548
P49189	P49189	AL9A1_HUMAN	ALDH9A1	175248	163211	125531	117744	145392	144387	185778	184611	73297.3	76501.3
P62820	P62820;Q9H0U4	RAB1A_HUMAN	RAB1A	174483	164111	110931	125057	132004	133389	236364	212421	139634	112564
P60033	P60033	CD81_HUMAN	CD81	171333	175749	70861.2	101339	35154.4	28865.3	40991.6	44027	84843	82748.5
Q07954	Q07954	LRP1_HUMAN	LRP1	171067	169884	82940.2	89920.9	217499	215229	135369	137880	231742	242160
P02452	P02452	CO1A1_HUMAN	COL1A1	169046	169450	54873.8	51414.6	148826	134731	118575	135644	143117	142423
P11169	P11169;Q8TDB8	GTR3_HUMAN	SLC2A3	168592	194567	1671850	1904130	183667	179814	653492	745941	12569.5	12710
P62879	P62873;P62879	GBB2_HUMAN	GNB2	166900	177235	137316	131601	127260	119336	313272	310387	106914	100708
P06737	P06737	PYGL_HUMAN	PYGL	166829	156881	146173	139828	161048	153709	170138	155919	205647	217728
Q16610	Q16610	ECM1_HUMAN	ECM1	166403	150557	105653	112055	821311	816317	93581.2	125120	65769.5	85491.5
P00352	P00352	AL1A1_HUMAN	ALDH1A1	162549	177968	57307.5	61513.2	78410.9	83666.1	68878.5	69028.8	65667.8	70810.2
P07339	P07339	CATD_HUMAN	CTSD	161044	162474	439860	55701	46229	50247.4	136669	163448	43992.1	40371.1
Q0VDG4	Q0VDG4	SCRN3_HUMAN	SCRN3	160380	165762	93201.9	98213.7	208544	194968	133561	124135	271081	242840
P62249	P62249	RS16_HUMAN	RPS16	159452	145625	294714	281185	131775	141821	215053	225147	302335	333504
P31939	P31939	PUR9_HUMAN	ATIC	159295	166995	156505	178902	191817	199582	149062	154290	149684	164274
P13611	P13611	CSPG2_HUMAN	VCAN	159264	141469	23974.5	23859.8	38243	40520.8	17106.9	21174.6	31404.3	33043.3
Q12981	Q12981	SEC20_HUMAN	BNIP1	157981	149031	61580.4	105571	214240	214103	94493.4	118513	20948.9	14659.1
O00299	O00299	CLIC1_HUMAN	CLIC1	157428	158195	144226	145699	124324	129104	200401	188488	89101	110667
P13987	P13987	CD59_HUMAN	CD59	157427	165652	101164	110017	71312.9	60252.5	143639	165941	459865	534383
Q02543	Q02543	RL18A_HUMAN	RPL18A	155583	142760	92720	97909.4	134608	125763	154699	155527	69860.9	90639.6
Q9H223	Q9H223;Q9NZN3	EHD4_HUMAN	EHD4	155476	132640	242241	222242	145774	157351	167993	172653	164131	150004
P23396	P23396	RS3_HUMAN	RPS3	154323	155816	310385	301851	123693	118225	226125	207783	204722	226210
P46776	P46776	RL27A_HUMAN	RPL27A	153923	169129	119611	137353	150200	139950	174641	197412	101513	129889
P01111	P01111;P01112	RASN_HUMAN	NRAS	153469	140489	101043	109539	86704.8	75199.9	209208	229826	51864.5	61315.4
P18206	P18206	VINC_HUMAN	VCL	153073	156218	73157.7	72964.9	122005	126564	131572	141219	101191	110179
Q93099	Q93099	HGD_HUMAN	HGD	152905	166286	43635.6	51469.7	118859	119754	66130.7	77407.7	48095.9	55161.3
P01344	P01344	IGF2_HUMAN	IGF2	152048	134998	32723.2	50474.9	87975.5	130322	88172.2	134037	28742.9	60024
P05388	P05388	RLA0_HUMAN	RPLP0	150063	159729	98143.1	104468	101851	94757.5	93473.4	88966.1	88783.5	99251.6
Q99816	Q99816	TS101_HUMAN	TSG101	149452	132843	117900	130730	54749.5	51698	156212	150450	132560	136888
Q8IZ83	Q8IZ83	A16A1_HUMAN	ALDH16A1	149005	138779	54042.7	65158	55482.5	96690.7	58237.3	70734.9	31145	34113.2
P62330	P62330	ARF6_HUMAN	ARF6	148706	161159	95828.5	100611	123773	130971	126043	136571	138276	128532
Q9UK55	Q9UK55	ZPI_HUMAN	SERPINA10	147365	146545	43891.8	44005.5	125752	116824	153169	145551	1413.63	1080.04
Q9Y6Z7	Q9Y6Z7	COL10_HUMAN	COLEC10	147327	142406	74934.4	82045.8	182565	164497	142418	152369	211956	154290
P05543	P05543	THBG_HUMAN	SERPINA7	146205	144664	20063.2	24839.7	140831	139897	106542	110297	34928.1	25255.1
P11216	P06737;P11216;P11217	PYGB_HUMAN	PYGB	145626	143534	135511	135046	158567	141520	136572	126708	162502	176898
P18440	P18440	ARY1_HUMAN	NAT1	145446	116572	74842.9	74678.9	116251	106207	101621	107047	54255.1	50889
Q562R1	Q562R1	ACTBL_HUMAN	ACTBL2	145080	154733	102499	112596	131704	131479	140972	133686	235396	245270
P18065	P18065	IBP2_HUMAN	IGFBP2	144999	136785	49941.9	51111	349237	363113	101193	98662.6	220891	281207
P49747	P49747	COMP_HUMAN	COMP	144485	153440	52292.2	55857	186627	162038	89619.9	79278.1	85743.5	110596
Q16394	Q16394	EXT1_HUMAN	EXT1	142501	155546	62965.3	66580.3	154084	161763	90198.4	90235.7	57152.4	56088.4
Q76LX8	Q76LX8	ATS13_HUMAN	ADAMTS13	141790	123983	62671.5	67554.5	240814	218817	87878.4	94896.2	137862	177003
P60660	P60660	MYL6_HUMAN	MYL6	141669	154886	120134	121286	216825	239293	267123	263065	167149	149461
Q9H082	Q9H082	RB33B_HUMAN	RAB33B	141483	197057					371474	422261
P35443	P35443	TSP4_HUMAN	THBS4	141419	141925	65032	72815.1	239280	198796	88347.2	101051	147385	127219
P04439	P01889;P04439	HLAA_HUMAN	HLA-A	141240	146752	215371	232089	159326	157562	244531	285662	57839.4	56913.1
P05783	P05783	K1C18_HUMAN	KRT18	140114	133171	241845	229761	6125.04	5208.16	29165.9	28767	50656.5	50931.4
P18669	P18669	PGAM1_HUMAN	PGAM1	139580	133045	138791	111869	132942	131426	202036	189776	120478	119356
P11940	P11940;Q4VXU2	PABP1_HUMAN	PABPC1	139301	150844	54320.1	51889.7	38349.9	40002.9	40914.9	35503.2	151644	173841
P61019	P61019;Q8WUD1	RAB2A_HUMAN	RAB2A	138051	147537	96701.2	106347	90392.6	92418.2	204919	210474	74458.3	86696.6
P18124	P18124	RL7_HUMAN	RPL7	137666	135126	130692	128757	114973	113435	129244	123043	161155	174330
P55263	P55263	ADK_HUMAN	ADK	137587	130784	81955	86430.7	136686	139464	95082.8	91982.2	63386.9	60671.7
P07477	P07477;Q9BYE2	TRY1_HUMAN	PRSS1	136658	190026	23792.3	68761.5	406366	233320	205185	176298	23797.6	28043
P35613	P35613	BASI_HUMAN	BSG	136137	133673	585458	621265	111329	107130	1027940	1109350	267223	269851
P05023	P05023	AT1A1_HUMAN	ATP1A1	135852	133465	321978	348765	121098	119971	438901	425930	124256	116981
P62280	P62280	RS11_HUMAN	RPS11	134755	133693	182827	176362	103642	105976	194966	159857	322998	296944
P50990	P50990	TCPQ_HUMAN	CCT8	134124	136982	466266	495106	96971.1	110172	208523	229622	165718	179568
P61106	P61106	RAB14_HUMAN	RAB14	133776	137222	108514	108785	106090	107726	216296	197051	131885	103336
Q96RW7	Q96RW7	HMCN1_HUMAN	HMCN1	133644	130363	55135.4	54433	152898	159884	88549.5	99273.5	117443	134227
P11413	P11413	G6PD_HUMAN	G6PD	132587	135072	61258	60532.7	52954.3	57756.1	70328.1	65304.3	43375.7	43246.5
P18827	P18827	SDC1_HUMAN	SDC1	132552	116882	45238.7	59884.7	9757.41	8760.63	57855.1	71059.8	131312	136252
P07900	P07900	HS90A_HUMAN	HSP90AA1	132524	130628	141754	159780	101477	90088.4	114032	108078	89885.9	103069
P53990	P53990	IST1_HUMAN	IST1	132088	137946	177375	202196	26545.6	27188.6	126877	129323	27236.5	26811.3
Q4G0X9	Q4G0X9	CCD40_HUMAN	CCDC40	131899	124210	32708.3	41002.4	161498	146555	95539	126829	50727.9	45564
Q15758	Q15758	AAAT_HUMAN	SLC1A5	131712	129253	787353	929500	48094.6	38231.7	115742	124493	34466.7	33352.2
O14786	O14786	NRP1_HUMAN	NRP1	129855	121853	32255.3	33682.8	31844.5	31964.3	21918.2	21662.4	32089.6	36052.1
P27635	P27635;Q96L21	RL10_HUMAN	RPL10	129614	119214	91856.2	112083	104224	135991	166395	182107	127606	137327
P01266	P01266	THYG_HUMAN	TG	129484	126308	36192.7	38664.8	129112	111723	114576	102560	11348.8	14680.7
P35580	P35580;Q7Z406	MYH10_HUMAN	MYH10	129078	120147	68575.5	61841.5	128330	126972	136479	117011	128834	116118
Q9Y678	Q9Y678	COPG1_HUMAN	COPG1	128974	131509	164400	182969	136086	129677	147551	140532	193236	185786
Q02094	Q02094	RHAG_HUMAN	RHAG	128817	124107	10182.5	21843.6	154190	185140	95087.4	102857	12775	15360
O14817	O14817	TSN4_HUMAN	TSPAN4	128217	109554	18985	17066.3	20017.8	18470.2	16403.3	18122.1	26523.4	28463.9
P62736	P62736;P63267;P68032;P68133	ACTA_HUMAN	ACTA2	127824	127912	98651.3	90940.6	130764	112328	113521	102778	163127	158274
P11766	P11766	ADHX_HUMAN	ADH5	127622	132528	103678	99869.8	143126	151065	112026	123827	194707	228396
O75325	O75325	LRRN2_HUMAN	LRRN2	127108	154151	28059.5	39678.5	157340	182598	82866.1	85907.4	8171.72	7990.93
P11586	P11586	C1TC_HUMAN	MTHFD1	127066	132295	162219	166556	126744	124578	151618	144868	132228	124183
Q9NR31	Q9NR31	SAR1A_HUMAN	SAR1A	126329	129376	104929	96304.7	150648	145870	148177	147172	139153	149726
P04792	P04792	HSPB1_HUMAN	HSPB1	125594	118309	217251	98688.7	89782.1	78565.9	141778	156844	177552	153509
P36578	P36578	RL4_HUMAN	RPL4	125440	131808	94975	98976.3	112522	115520	136578	135930	131731	125502
O43570	O43570	CAH12_HUMAN	CA12	125367	132110							5475.11	7728.39
P84085	P84085	ARF5_HUMAN	ARF5	124344	111810	102776	135230	130007	196316	110008	125884	103560	115212
P05121	P05121	PAI1_HUMAN	SERPINE1	123804	109060	344760	358400	172763	164854	6712.2	4711.45	115494	102796
P53396	P53396	ACLY_HUMAN	ACLY	123731	121358	104720	110818	124503	115563	101499	100592	125027	122121
O00151	O00151	PDLI1_HUMAN	PDLIM1	123574	106356	67534	71461	161282	156937	134476	125607	99796.7	117746
P40429	P40429;Q6NVV1	RL13A_HUMAN	RPL13A	122564	116796	116188	114963	131619	113206	141705	132918	217086	206831
P12429	P12429	ANXA3_HUMAN	ANXA3	122258	120753	404027	336219	54727.8	42155.8	107057	87146.5	133581	143678
Q9UK41	Q9UK41	VPS28_HUMAN	VPS28	122040	108643	90332.7	97808.5	41809.9	35968.3	126326	122764	98516	98279
P48509	P48509	CD151_HUMAN	CD151	121325	142613	71379.6	81234.4	55427.4	55731.3	53864.4	63260.6	56216.8	76467.3
Q15493	Q15493	RGN_HUMAN	RGN	120975	115156	45599.3	40177.5	142540	146208	84771	83048.2	92288.7	105021
O95834	O95834	EMAL2_HUMAN	EML2	120661	116416	61890.2	66311.4	135035	140198	97891.5	100735	137380	97187.7
P15153	P15153	RAC2_HUMAN	RAC2	120626	116620	61282	70980.3	111482	115550	131766	125464	104559	68402.2
Q14112	Q14112	NID2_HUMAN	NID2	120288	118155	14047.3	14384.3	106492	86222	94219.3	104740	36485.7	34007.9
P12814	P12814	ACTN1_HUMAN	ACTN1	119924	118560	194604	187629	111369	101457	119867	122725	86609.2	83333.8
P31146	P31146	COR1A_HUMAN	CORO1A	119678	112330	74652.6	74672.3	109968	111031	84711.1	88581.1	152867	153546
P55083	P55083	MFAP4_HUMAN	MFAP4	119561	135054	66511.4	80355.3	182918	193060	142995	171474	108667	107536
P51812	P51812	KS6A3_HUMAN	RPS6KA3	119422	119588	90254.4	98698.4	126979	125335	112324	109956	120661	115390
Q12860	Q12860	CNTN1_HUMAN	CNTN1	118877	126201	30356.7	34095.3	46607	49194	31403.4	31753.6	30591.8	33476.6
P15121	P15121	ALDR_HUMAN	AKR1B1	118632	110270	22958.6	25329.4	56421.2	52043.5	37468.6	44857.6	54017	53478.3
Q8TDB8	Q8TDB8	GTR14_HUMAN	SLC2A14	117983	124422	37402.1	57838.8	111125	107331	123729	143181	11626.2	21360.1
Q16555	Q16555	DPYL2_HUMAN	DPYSL2	117439	110804	76307.2	81120.9	107849	105596	80278.9	80609.2	116385	113026
P46779	P46779	RL28_HUMAN	RPL28	115925	101718	91737.8	87287.7	74788.3	81118.6	117618	115952	133166	140662
P19827	P19827	ITIH1_HUMAN	ITIH1	115678	116041	56698.8	59514.2	145017	149514	62763.1	83760.4	40074	61354.2
Q96IY4	Q96IY4	CBPB2_HUMAN	CPB2	115162	122382	57361.8	68751.6	210848	215827	84763.4	109530	112275	124798
P26641	P26641	EF1G_HUMAN	EEF1G	114965	117352	245691	249972	98712.3	103867	190045	153490	132761	113180
O95497	O95497	VNN1_HUMAN	VNN1	113389	113435	17710.4	19036.2	90096.4	86089.7	62689.4	63107.2	70058.9	26684.3
O14964	O14964	HGS_HUMAN	HGS	111878	104282	78385.3	82123.9	68347.2	69516.3	93258.5	105426	71189.9	71313.6
P07738	P07738	PMGE_HUMAN	BPGM	111665	111963	68329.3	58657	103697	88674.8	90992.5	92763.9	111855	123439
O60701	O60701	UGDH_HUMAN	UGDH	111117	113914	66759.2	67643.5	98024.3	103418	83892.6	81049.8	84335	88071.3
P05771	P05771	KPCB_HUMAN	PRKCB	109955	110681	72572.2	77119.2	55945.3	60220	160160	157595	73489.1	80522.5
P61313	P61313	RL15_HUMAN	RPL15	109487	111935	120583	110152	85435.2	86742.4	107928	120282	72185.8	78428.2
Q7Z304	Q7Z304	MAMC2_HUMAN	MAMDC2	108934	116773	36644.4	36573.2	100536	96961.8	134013	134773	31244.7	32556
P39687	P39687;O43423	AN32A_HUMAN	ANP32A	108901	103511	26093.7	24068.1	57762.9	54028.7	39423	41659.9	4684.42	4939.33
Q06830	Q06830	PRDX1_HUMAN	PRDX1	107981	103320	163876	153650	51691.5	41267.8	268725	264258	37933.1	31589.2
P49368	P49368	TCPG_HUMAN	CCT3	107969	106801	348475	342241	95149.3	86913.1	160435	149628	167187	164751
P09525	P09525	ANXA4_HUMAN	ANXA4	107870	93798.1	64748.2	62940.8	27340.3	24849.5	99472.9	111427	37641.7	36451.7
P84098	P84098	RL19_HUMAN	RPL19	107799	76332.4	81098.5	87363.1	87030.3	89487.8	80875.2	90800.1	31470	18320.8
P31949	P31949	S10AB_HUMAN	S100A11	107485	101018	218153	185966	34815.7	35362.1	123201	104250	75946.4	73271.4
P11717	P11717	MPRI_HUMAN	IGF2R	106703	106199	102421	113123	83461.4	64515.4	131090	130775	79563.6	66995.4
Q12805	Q12805	FBLN3_HUMAN	EFEMP1	106295	108249	46513.6	48156.6	203370	216112	94636	100249	98854.5	106216
P16152	P16152	CBR1_HUMAN	CBR1	106029	100453	78439.2	71795.3	101572	93913.8	98992.5	94838.6	151187	148020
P22314	P22314	UBA1_HUMAN	UBA1	105788	101771	145197	150420	108233	112525	126075	125264	121716	116227
P62917	P62917	RL8_HUMAN	RPL8	105614	116975	110203	95374.4	80572.6	86563.1	116218	98747.2	115075	102038
Q709C8	Q709C8	VP13C_HUMAN	VPS13C	104531	97200.7	62869	67547.6	112593	114302	89028.6	89868.7	74234.1	85707.5
P62829	P62829	RL23_HUMAN	RPL23	104209	103700	115313	113056	67340.6	75949.6	131295	132359	137825	132521
P05386	P05386	RLA1_HUMAN	RPLP1	103670	102309	46859.7	55158.5	51293.5	52062	61650.3	62036.9	3342.64	4493.48
P12931	P06241;P07947;P12931	SRC_HUMAN	SRC	103659	112624	35737.7	39823.3	42066.3	44793.5	66568.5	71604	79130.8	73874.4
P20073	P20073	ANXA7_HUMAN	ANXA7	103489	99761.6	82267.5	86063.5	58090.5	64041.6	179918	179179	55914.1	51840.5
P15531	P15531	NDKA_HUMAN	NME1	103419	84509.1	114364	118933	59503.3	55207.3	183970	173378	36684.3	42967.5
Q9HBI1	Q9HBI1;Q9NVD7	PARVB_HUMAN	PARVB	103205	98649	69782.8	78411.5	100695	102394	86734.4	98196.5	90031.2	97049.1
P27348	P27348	1433T_HUMAN	YWHAQ	102071	108185	131856	130166	75915.7	62028.6	131783	134884	74063.4	76420.5
Q8NBM4	Q8NBM4	UBAC2_HUMAN	UBAC2	102064	79155.6	15933.7	16622	81370.3	70613.1	72392.7	125067	78671.3	72785.7
Q13642	Q13642	FHL1_HUMAN	FHL1	101633	95221.3	65994.7	72277.6	123894	122896	88785.7	87506.8	149447	135855
P04003	P04003	C4BPA_HUMAN	C4BPA	100825	115521	221726	297896	126070	97709.2	62170.6	76494.5	29041	42744.8
Q9NQC3	Q9NQC3	RTN4_HUMAN	RTN4	99915.8	90810.5	50379.6	50088.8	26055.9	29444.5	40092.2	32450.2	77706.5	78207.9
Q86YQ8	Q86YQ8	CPNE8_HUMAN	CPNE8	99512.5	129370	8475.24	10291.9	18444.7	18794.7	188505	199930	17817.3	18747.2
Q9Y617	Q9Y617	SERC_HUMAN	PSAT1	99360.9	100265	175394	180247	174847	171744	168819	176193	104983	79898.8
P50148	P50148	GNAQ_HUMAN	GNAQ	98939.8	104860	83222.3	85461.8	55867	47915.7	163153	168782	61090.6	59037.5
P02786	P02786	TFR1_HUMAN	TFRC	98775.4	108094	239674	257294	59614.2	52335.2	280852	274933	146010	140973
Q9BQ52	Q9BQ52	RNZ2_HUMAN	ELAC2	98294	84630.8	423358	425955			144370	144870	145028	144355
Q8NG11	Q8NG11	TSN14_HUMAN	TSPAN14	98150.4	97442	41153.6	38262	33601.4	35436.2	61324.1	59762.6	68906.6	68588.5
P17858	P08237;P17858	PFKAL_HUMAN	PFKL	97821.3	96550.3	76302.8	79508.7	102759	101349	83830.5	89562	99841.6	106616
O43854	O43854	EDIL3_HUMAN	EDIL3	97557.9	95770.2	4894.85	5818.35	363095	369983	14857.3	12737.6	5975.5	5304.21
O15484	O15484	CAN5_HUMAN	CAPN5	97198.5	100965	48698	53324	89360.8	88964.4	109053	112225	59105.8	65201.6
P62269	P62269	RS18_HUMAN	RPS18	96480.5	101698	197404	188220	80853.2	82546.7	171897	162494	110186	110462
P27708	P27708	PYR1_HUMAN	CAD	96094.5	95839.4	140915	155773	81949	80103.3	69428.6	71978.3	80174.4	75551.2
Q8N573	Q8N573	OXR1_HUMAN	OXR1	95197	98445.1	175260	211705	93262.9	79635.1	65156.7	85477.4	33518.6	54764.9
P09467	O00757;P09467	F16P1_HUMAN	FBP1	94545	87301.8	47442	60393	105387	92048.4	68017.3	88272.8	19786.8	19691.2
P26583	P26583	HMGB2_HUMAN	HMGB2	94185.4	124384	11603.3	9792.17	34577.9	26714.3	12846.4	12517.7	6481.47	5465.38
Q14764	Q14764	MVP_HUMAN	MVP	94176.7	91114.3	6322.45	5594.3	41534.2	39025.6	28270.9	30732.8	210048	227015
Q15555	Q15555	MARE2_HUMAN	MAPRE2	93905.2	94425.3	63769.5	70386.1	103229	100393	78228	72280.3	103196	97971.5
Q92820	Q92820	GGH_HUMAN	GGH	93816.5	91465.5	97409.9	91047.4	32419.4	26722	84827.8	82342.6	19190.9	24120.4
P62851	P62851	RS25_HUMAN	RPS25	93619.8	94786.7	134414	137040	74402.8	72682.8	130002	122023	19373.6	19821.7
P17693	P17693	HLAG_HUMAN	HLA-G	93477.8	177561	90076.9	107106	105011	98493.4	268401	224713	108674	141462
O75874	O75874	IDHC_HUMAN	IDH1	93220.4	92216.9	31007.4	34012	117413	121741	46759.2	43389.2	49997.3	46932.3
P04424	P04424	ARLY_HUMAN	ASL	92957.6	91478.1	48750.3	53511.7	118172	111628	59528	61883.8	100555	100308
P61077;P62837	P61077;P62837	UB2D2_HUMAN;UB2D3_HUMAN	UBE2D2;UBE2D3	92504.2	96685.4	68987.7	59650.9	57399.2	39603.8	134466	163106	65025	63957.4
P13497	P13497;Q9Y6L7	BMP1_HUMAN	BMP1	92488.4	87871.5	22033.3	24335.9	89198.3	89823.4	58726.5	64635.3	83256.9	78229.7
Q13219	Q13219	PAPP1_HUMAN	PAPPA	92446.5	91055.8			3654.72	4117.45	4410.06	4997.17	3503.01	3354.23
P15086	P15085;P15086	CBPB1_HUMAN	CPB1	92419.2	263805	123639	107218	158897	67362.9	180940	230520
Q01813	Q01813	PFKAP_HUMAN	PFKP	92280.2	100671	87905.9	87402	84843	86738.8	114877	102923	150018	150345
O75891	O75891;Q3SY69	AL1L1_HUMAN	ALDH1L1	91729.5	97337.1	54567.7	53711.3	84593.6	84320.2	70664.5	70408.8	72404	69921.3
Q15019	Q15019	SEPT2_HUMAN	SEPTIN2	91145.3	93626.9	95100.5	93935.2	93881.5	90564.1	92477.6	86590.6	115243	96027.3
Q6ZUS5	Q6ZUS5	CC121_HUMAN	CCDC121	91084	89050.8	178466	165895			54267	40215.3
Q9NRN5	Q9NRN5	OLFL3_HUMAN	OLFML3	90384	85817.2	39010	43061.9	56454.7	60953.5	38780.5	33008.9	69196.1	59665.8
P08133	P08133	ANXA6_HUMAN	ANXA6	89875.2	97928	232927	242276	65433.8	64012.7	247072	226334	40036.2	38071.9
P39023	P39023	RL3_HUMAN	RPL3	89809.4	90098	92070.8	97651	72391.4	73474.4	105092	105919	101707	109158
P62140	P36873;P62136;P62140	PP1B_HUMAN	PPP1CB	89776.3	90065.7	104446	109353	77119.1	73790.7	89993.7	86016	56478.1	63243.3
Q9UM47	Q9UM47	NOTC3_HUMAN	NOTCH3	89767.1	89689	51526.9	60614.8	110510	119841	71505.4	74947.8	97538.4	102409
P04075	P04075	ALDOA_HUMAN	ALDOA	89300.2	90237.2	172783	180623	62526.3	56224.6	77614.1	89360.8	51199.7	44562
Q15286	Q15286	RAB35_HUMAN	RAB35	89075.1	81744.1	65264.7	72038.4	36821.1	34623.8	147981	137413	48875.8	55304.5
Q9UBV8	Q9UBV8	PEF1_HUMAN	PEF1	89045.4	86639.4	148987	168542	46823.6	44594.8	84806.3	89820.8	27042.2	32770.5
P17987	P17987	TCPA_HUMAN	TCP1	88957.9	95382.9	279440	279376	91694	83413.9	134290	126118	133184	129581
Q9HDC9	Q9HDC9	APMAP_HUMAN	APMAP	88103.7	85381.1	62930.4	40843.5	82741.2	91098.2	63507.4	117238	33241.1	24004
Q9Y3L5	Q9Y3L5	RAP2C_HUMAN	RAP2C	87757.1	91231.4	72836.3	76942.8	61670.8	61027.9	121894	131903	42505.3	49110.5
P55209	P55209	NP1L1_HUMAN	NAP1L1	87562.7	88288.1	167979	158051	77499	74487.1	108278	99004.6	100140	95188.9
P49888	P49888	ST1E1_HUMAN	SULT1E1	87418.5	102590	60942.4	81077.8	151161	142859	54110.8	63969.2	56079.6	72378.2
P62328	P62328	TYB4_HUMAN	TMSB4X	87158.2	85802.3	39146.8	44446.2	44645.2	44383.7	76094.6	67930.9	41005.4	41372.5
Q93088	Q93088;Q9H2M3	BHMT1_HUMAN	BHMT	87120.2	89765.9	51053.8	57730.5	126323	116347	60546.5	73643.2	100359	85982.3
P20340	P20340	RAB6A_HUMAN	RAB6A	86424.3	80793.7	88124.3	90323.3	66583.1	60837.4	121756	113929	52735.9	52466.7
P78371	P78371	TCPB_HUMAN	CCT2	85532.1	86438.2	255196	241802	73959.4	65035.2	123433	120630	128107	122909
P10599	P10599	THIO_HUMAN	TXN	85500.3	86025	92120.1	67063.1	57601.2	59516.6	121107	145003	49784.5	55070.5
Q13126	Q13126	MTAP_HUMAN	MTAP	85389	81746.3	39263.4	38626.3	77317.2	83723.7	61935.4	67444.4	96473	108430
Q9P126	Q9P126	CLC1B_HUMAN	CLEC1B	85014.3	86565.9	47033.1	55369.9	34241.9	37858.9	114079	143416
Q14644	Q14644	RASA3_HUMAN	RASA3	84812.3	92466.7	57092.8	64642.5	61406.4	55015.9	129127	121173	43106.3	40245.3
P62753	P62753	RS6_HUMAN	RPS6	84696	79686.5	82081	70868.8	64249.6	62528.8	102650	93704.4	65118.6	62945.2
P62424	P62424	RL7A_HUMAN	RPL7A	84562.7	83452.9	70585.9	71235	64852.9	72916.4	82905.2	79048.7	82721.2	89630.9
Q8NI99	Q8NI99	ANGL6_HUMAN	ANGPTL6	84502.6	74596.1	43773.9	42294	98820	85188.8	69362.7	64377.3	85088	87734.3
P33908	P33908	MA1A1_HUMAN	MAN1A1	84438.3	63925	32025.9	40744	88757.2	106072	37172.6	38593.5	45056.4	51454
P61006	P61006;Q92930	RAB8A_HUMAN	RAB8A	84070.9	83141.5	51374.7	54206.3	61340.5	64590	131780	116220	65275.7	56636.6
P60981	P60981	DEST_HUMAN	DSTN	83141.7	84283.9	72189.9	73407.7	67432.9	69477.2	73255.8	76741.5	39608	51059
P00491	P00491	PNPH_HUMAN	PNP	83113.9	81062.3	72431.9	72527.4	111174	105729	174775	185823	64418.1	51189.1
Q9Y3U8	Q9Y3U8	RL36_HUMAN	RPL36	83109.6	88814.1	74674.2	72651.4	60521.1	60934.9	77160.5	55073.6	77095.3	78428.8
O75694	O75694	NU155_HUMAN	NUP155	82956.4	97454.4	80218.1	63907.8	124123	133169	136745	103020	182727	95056.2
P04632	P04632	CPNS1_HUMAN	CAPNS1	82436.8	78361.1	62272.4	59946.2	80297.3	86560.3	61577.2	60198	74088.6	73976.2
P29401	P29401	TKT_HUMAN	TKT	82415.6	87399.7	92300.3	88891.7	70176.5	58088.5	103138	99567.8	57263.1	57784.6
P60900	P60900	PSA6_HUMAN	PSMA6	82224.6	86867.4	50351.4	49370.2	86546.1	88007.9	133700	135865	48165.8	46071.7
Q5VW32	Q5VW32	BROX_HUMAN	BROX	82185.3	74532.2	115462	109516	17348	20047.2	79319	70945.7	77879.6	65870.4
Q16853	Q16853	AOC3_HUMAN	AOC3	82165.5	75128.5	17240.8	24577.5	55509.9	55654.4	65262.5	85408.1
P05160	P05160	F13B_HUMAN	F13B	81793.8	114078	85479.6	103372	106458	93263.7	39497.4	40272.1	37779.2	31254.9
Q92538	Q92538	GBF1_HUMAN	GBF1	81677.1	79104.5	61985.3	69285.6	86938.9	73431.8	67581.3	68413.3	69056.1	85378.7
Q9H4G4	Q9H4G4	GAPR1_HUMAN	GLIPR2	81602.9	77494.8	53870.1	50248.6	38707.6	41032.8	92163	101540	30468.5	36449.8
O43294	O43294	TGFI1_HUMAN	TGFB1I1	81555.3	73593.9	35297.6	37023.1	87470	75332.4	61167.6	60697	72537.5	91071.1
P37802	P37802	TAGL2_HUMAN	TAGLN2	81509.1	86382.9	50223.7	47596.7	97010	90960.7	93065.2	89519.5	94805	108097
P67936	P67936	TPM4_HUMAN	TPM4	81504.9	76521.9	97252.5	59910	128850	119402	91088	81905.4	80683.5	78201.4
Q16658	Q16658	FSCN1_HUMAN	FSCN1	81113.3	96717.4	65127.4	65761.1	71188.8	69852.4	151294	144809	101897	95031.2
P04278	P04278	SHBG_HUMAN	SHBG	81069.3	69472.9	14515.3	15817.8	73496	76855.8	41283.2	38879.3	78381.6	72632.7
P0DTE7;P0DTE8;P0DUB6;P19961	P04746;P0DTE7;P0DTE8;P0DUB6;P19961	AMY1A_HUMAN;AMY1B_HUMAN;AMY1C_HUMAN;AMY2B_HUMAN	AMY1A;AMY1B;AMY1C;AMY2B	81004.9	85399.5	19234.7	18355.1	79866.6	67775.5	71239.9	69451.2	26979.1	30727.2
Q86VP6	Q86VP6	CAND1_HUMAN	CAND1	80520.7	82641.5	60725.3	61819.8	76510.3	76753.1	72380.5	76158.9	76482.5	76492.9
P10643	P10643	CO7_HUMAN	C7	80269	82198.9	42209.8	36585.3	75724.8	70126.6	67468.9	58492.6	170869	64793
Q99536	Q99536	VAT1_HUMAN	VAT1	80261.1	85333	52015.5	53888.1	73323.6	81378.5	89215.8	96020.3	52463.9	41650.8
O60232	O60232	ZNRD2_HUMAN	ZNRD2	80058.9	59980.4	33579.3	36481.9	60225.5	56764.3	68632.3	70525.1	64510.4	54745.4
Q96KP4	Q96KP4	CNDP2_HUMAN	CNDP2	79546.3	80272.8	42691.7	43761.8	71539.3	67949.1	52407.8	46412.8	69086.3	75719.3
Q12931	Q12931	TRAP1_HUMAN	TRAP1	79477.7	66539.8	79467.5	49995.3			125313	112505
P59998	P59998	ARPC4_HUMAN	ARPC4	79471.7	72818.9	61054.3	58522.4	85708.2	87564.1	70114.5	100706	66996.6	83891
P07741	P07741	APT_HUMAN	APRT	79120.5	73354.3	180277	184803	55599.7	54953.9	170943	155285	82522.8	74794.3
O43633	O43633	CHM2A_HUMAN	CHMP2A	78446.8	90227	153959	142050	17681.3	19330.7	86752.8	75246.4	34897.6	51629.6
P35858	P35858	ALS_HUMAN	IGFALS	78411.3	86274.1	29682	33738.6	63291	63931	36418.5	40652.7	65853.5	77532.3
P61160	P61160	ARP2_HUMAN	ACTR2	77857.8	76189.5	59991.1	59710.4	78736.2	78609.1	65785.8	65574.4	65564.9	60197.1
P50395	P50395	GDIB_HUMAN	GDI2	77659.7	72662.8	53192.4	53034.4	46407.3	52253.2	117088	114624	46757.1	46957.5
Q9NQW7	Q9NQW7	XPP1_HUMAN	XPNPEP1	77465.6	78205	47452.2	52264.9	80597	78486	66343.8	67261.6	79326.4	76814
P07814	P07814	SYEP_HUMAN	EPRS1	77439.4	68393.6	171873	177289	58917.2	62926.3	106688	104531	100014	97700.1
Q14697	Q14697	GANAB_HUMAN	GANAB	77347.2	73108.4	83066.2	84135.1	40282.1	37336.6	31393.5	31283.1	56920.8	57678.8
P02538	O95678;P02538;P48668	K2C6A_HUMAN	KRT6A	77065	88111.5	797133	35090.4	74683.9	15408.9	110443	175674	189039	177752
P31946	P31946	1433B_HUMAN	YWHAB	76921.9	68973.4	76362.5	74745.7	44467.2	45187.7	91139.8	96593.4	42611	42720.1
P67775	P62714;P67775	PP2AA_HUMAN	PPP2CA	76654.9	75123.5	76268.3	88521.3	87538.4	79388.2	76137.1	81683.8	94188.4	96150.7
P63244	P63244	RACK1_HUMAN	RACK1	76653.7	83470.9	249212	247830	68528.7	70280.5	138011	130156	151742	146130
P06703	P06703	S10A6_HUMAN	S100A6	76610.5	64539.6	84314.5	83324.5	27912.2	27394.7	96106.3	99495.6	49733.5	80897.9
P23229	P23229	ITA6_HUMAN	ITGA6	76107.9	78549.3	107410	116543	41175.1	41546.9	77995.7	73060.5	119924	128337
P17643	P17643	TYRP1_HUMAN	TYRP1	75998.7	134498	26548.6	25288.5	99360.9	70202.4	161520	82676	213736	155631
Q9P2H5	Q9P2H5	UBP35_HUMAN	USP35	75983.9	65187	27873.4	28214.8	76525.5	76766.2	50109	59673.6	46361	24057.6
P40227	P40227	TCPZ_HUMAN	CCT6A	75815.1	85593.4	240760	234185	73059.1	71592.2	114908	114165	125988	109216
Q9UBI6	Q9UBI6	GBG12_HUMAN	GNG12	75773.2	71844.7	32936.3	36441.9	49649.5	46082	225119	211116	21138.7	21190.9
P49327	P49327	FAS_HUMAN	FASN	75233.9	75413.5	517767	534904	50211.2	48509.5	181861	183127	109869	105875
Q13501	Q13501	SQSTM_HUMAN	SQSTM1	74817.3	78284.1	35177.6	33144.9	56577.8	49195.1	167649	145131	66750.8	56080.1
P34896	P34896	GLYC_HUMAN	SHMT1	74751.4	75691.6	61108.7	54680.5	67919.7	68894.2	64764	64422.2	73044.6	60246.2
P23381	P23381	SYWC_HUMAN	WARS1	74627.3	73094.9	35654.8	36981.9	65032.1	63871.4	59028.9	48265.3	78734.8	76685.5
P60903	P60903	S10AA_HUMAN	S100A10	74090.7	69656.5	83325.5	81884.6	22642	20887.6	56946.9	51330.6	48764.3	53858.5
P63010	P63010;Q10567	AP2B1_HUMAN	AP2B1	73923.7	73267	55079.1	60449.2	64334.7	57267.9	77925.7	78225.2	52407.5	53715.6
P62244	P62244	RS15A_HUMAN	RPS15A	73884.1	72730.5	139942	108569	74023	55658.8	99722	93130.4	96901.8	95738.3
Q9UNP9	Q9UNP9	PPIE_HUMAN	PPIE	73030.9	81694.8	40457.4	41993.3	110297	131085	71684.2	66080.8	54529.3	58007.3
Q9BXJ4	Q9BXJ4	C1QT3_HUMAN	C1QTNF3	72783.5	72393.1	83236.3	105752	71022.1	71226.2	55589.9	59640.1	29228.2	25536.6
Q9Y230	Q9Y230	RUVB2_HUMAN	RUVBL2	72646.6	67103.5	115717	120101	65693.8	61523.1	91807.5	80310.8	94847.6	85374.3
P54652	P54652	HSP72_HUMAN	HSPA2	72217	71338.1	29881.6	33608.7	29842	31543.1	39951.6	38583	27351.1	28099.4
Q5TEC6	P68431;P84243;Q16695;Q6NXT2;Q71DI3;Q5TEC6	H37_HUMAN	H3-7	72160.9	29573.8	43218.4	62633.9	42241.7	40049.2	34204.6	64371	48281.6	36988.5
P15880	P15880	RS2_HUMAN	RPS2	72151.9	68616.4	119982	117397	57804.6	56876.4	92969.4	92577.1	50286.1	58038.7
P21964	P21964	COMT_HUMAN	COMT	71770.3	71663.7	33918.1	31183.4	93912	93311.4	41604.9	40690.2	67258.9	67112.4
P07384	P07384	CAN1_HUMAN	CAPN1	71558.3	61628	55440.1	49182.7	71175.6	69859.5	66501.4	64925.4	47928.1	47398.6
P24844	P24844	MYL9_HUMAN	MYL9	71473.4	67185.5	35705.1	39560.3	158499	146740	91904.6	99841.5	64600.9	70382.3
Q00839	Q00839	HNRPU_HUMAN	HNRNPU	71083.8	69363.7	165222	162318	41938.9	40518.8	84936.8	74868.8	74252.8	79706.3
P50502	P50502;Q8NFI4	F10A1_HUMAN	ST13	70837	68896.8	25151	24068.4	42380.9	45207.9	30251.1	32930.6	17675.2	20947.8
P15559	P15559	NQO1_HUMAN	NQO1	70773.9	78855.5	27364.8	28388.2	4295.06	4194.01	19160.5	17723.2	12104.7	8477.71
P17980	P17980	PRS6A_HUMAN	PSMC3	70614	70063.2	130526	138961	73929.4	70699	85971.2	83062.1	97938.8	97012.4
P61158	P61158	ARP3_HUMAN	ACTR3	70389.9	72796.5	53124.7	53327.4	75060.2	67566.4	62675.3	60780.4	79443.2	72143.9
Q53S08;Q9H0N0	Q9H0N0;Q9NRW1;Q53S08	RAB6C_HUMAN;RAB6D_HUMAN	RAB6C;RAB6D	70225.1	95691.9	52948	54336	64312.4	51564.5	111381	93066.5	116172	118557
P18621	P18621	RL17_HUMAN	RPL17	70206	73901.2	68770.5	70333.1	60660.2	56776.7	77548.7	77514.9	73043.2	62283.3
P17301	P17301	ITA2_HUMAN	ITGA2	70177.2	75618	30667.4	33115.1	21946	21783	31392.6	25879.4	64274.7	72383.1
Q6P2Q9	Q6P2Q9	PRP8_HUMAN	PRPF8	70141.6	67878.5	110296	119229	26672.9	25353.4	37155	36188.1	47430.1	47410.5
Q14520	Q14520	HABP2_HUMAN	HABP2	69839.7	73821.8	161960	153775	79804.5	77091.2	58084.9	56872.7	13973.5	13172.4
P62701	P62701;Q8TD47	RS4X_HUMAN	RPS4X	69637.1	71506.7	125089	118917	54293.5	57486.3	106619	93073.8	120210	111921
O75351	O75351	VPS4B_HUMAN	VPS4B	69265.3	72414.6	105756	107151	40599.9	44757	67950	60853.3	51632.2	54614.2
Q5T4S7	Q5T4S7	UBR4_HUMAN	UBR4	69203.7	69851.1	46890.6	50354.1	82758.7	83972.4	58912.3	63389.2	56728.1	57479.2
P05109	P05109	S10A8_HUMAN	S100A8	69177.9	76792.6	174990	30455.5	22478	14540.8	100457	90116
O75131	O75131	CPNE3_HUMAN	CPNE3	69163.9	76654.9	223698	202030	30180.1	27687.5	120475	117236	58970.5	58698.3
O14950;P19105	O14950;P19105	ML12A_HUMAN;ML12B_HUMAN	MYL12A;MYL12B	69100.6	55743	67783.7	51758.9	105590	104837	168232	142804	91726.8	81994.1
Q9Y240	Q9Y240	CLC11_HUMAN	CLEC11A	68900.2	70193.1	45381.2	42114.5	91166.1	80972.9	58501.7	52222.1	28287.2	38202.4
Q8NHP1	Q8NHP1	ARK74_HUMAN	AKR7L	68746.2	53941.6	35525.1	41888.7	51561.6	45553.6	42246.6	38625.7	63041.2	61431.8
P48643	P48643	TCPE_HUMAN	CCT5	68499.3	68794	233327	242065	56824	56167.8	103915	98985.2	89065.6	85643.2
P21695	P21695	GPDA_HUMAN	GPD1	68409.1	70153.9	37275.2	35172.3	66261.5	68404.7	61441.2	60988.7	66157.5	60265.4
Q01650	Q01650	LAT1_HUMAN	SLC7A5	68223.8	75753.6	92139.5	112194	25483.3	32249.8	299742	326910	41058.4	43452.7
Q9P2B2	Q9P2B2	FPRP_HUMAN	PTGFRN	68102.5	68802.8	201191	215794	47495.9	49200.8	173178	179597	252682	251257
P49458	P49458	SRP09_HUMAN	SRP9	68095.5	66638.4	40324.9	43664.7	7506.77	8415.73	11889.3	12199.2	73438.8	78757.7
O00159	O00159	MYO1C_HUMAN	MYO1C	67758.6	65855.1	60194.8	62996.6	53752.1	56056.5	67210.7	66654.7	55912.4	56588.9
P52895	P52895;Q04828	AK1C2_HUMAN	AKR1C2	67650.8	69214.5	7707.58	11974.2	18266.7	14831	18220.2	16183.3	11640.3	11692.1
Q9H0U4	Q9H0U4;Q92928	RAB1B_HUMAN	RAB1B	67632.4	61273	55449.5	53301.2	47944	46664.3	100996	88626.1	72705.6	64865.3
P08865	P08865	RSSA_HUMAN	RPSA	66864.9	72239.6	153925	166403	80735.5	74167.4	85088.4	88247.2	126312	110086
Q06210	Q06210	GFPT1_HUMAN	GFPT1	66626	61041.6	56201.1	62072.2	64925.7	62058.8	54238.8	51129.2	74942.4	71330.4
O15145	O15145	ARPC3_HUMAN	ARPC3	66623.6	65967.1	46636.3	58154	83188.6	74514.1	56394.9	63372.6	63819.5	69944.5
P61981	P61981	1433G_HUMAN	YWHAG	66612.9	70284.1	68777.5	68228.1	48211.7	46280.5	106015	96154.5	58212.8	48617.6
P19440	A6NGU5;P19440	GGT1_HUMAN	GGT1	66526.3	62530.6	6248.27	6627.14			16794.3	14959.5
Q14344	Q14344	GNA13_HUMAN	GNA13	66344.7	65868.5	47478	54851.8	33997.6	33598.6	102085	94995.3	28772.7	25583.4
P30626	P30626	SORCN_HUMAN	SRI	66332.7	71146.4	38216.6	48082.9	90868.5	77404.2	84362.5	91585.6	31403.5	58622.7
Q9H2A2	Q9H2A2	AL8A1_HUMAN	ALDH8A1	66252.8	72959.8	36893.8	34792.3	74415.4	84595.7	56844.9	59219	83274.2	37472.3
P18077	P18077	RL35A_HUMAN	RPL35A	66182.4	71547	28827.7	32926.7	69873	67427.7	66349	84704.3	128533	95569.8
Q12965	Q12965	MYO1E_HUMAN	MYO1E	66126	64444.8	30385.8	33702.7	50006.7	49548.6	58524.5	61675.2	62651.1	59904.9
P18084	P18084	ITB5_HUMAN	ITGB5	66058.5	65828.2	37037.8	38211.5	19046.9	15209	59743.2	66833.3	36352.6	39417.3
P15169	P15169	CBPN_HUMAN	CPN1	66023	57520.9	13875.2	14868	55237	52541	22644.5	20245.1	47694.1	56191.2
Q96RI0	Q96RI0	PAR4_HUMAN	F2RL3	65942.9	64589	34544	34542	53056	53375.1	87210.6	81844.5	65684.9	48507.3
P55058	P55058	PLTP_HUMAN	PLTP	65789.8	48984.3	23496	30031.7	96575.4	62988.1	34538.7	37292.6	32022.1	70650.5
Q01105	P0DME0;Q01105	SET_HUMAN	SET	65549.2	62865.7	75667.9	69480.2	74537	63908.6	57065.7	50409	8953.77	8711.62
Q16288	Q16288	NTRK3_HUMAN	NTRK3	65294.1	72446.7			4254.73	3917.15
P19338	P19338	NUCL_HUMAN	NCL	64951.7	61001.4	46874.1	43720.6	53492.6	56900.1	46698.5	44526.6	14432	14976.8
O43175	O43175	SERA_HUMAN	PHGDH	64889.1	63318	41590.3	47363.4	48477.8	51335.8	125492	140053	34016.2	33808
P05155	P05155	IC1_HUMAN	SERPING1	64852.1	61790.5	6817.16	8394.01	96586.7	87058	31266.8	43467.8	75728	72381.5
Q8WZ42	Q8WZ42	TITIN_HUMAN	TTN	64814.1	71365.6	53660.5	54373.1	69270.8	66687.6	52208	74516.1	25175.5	12851.4
P46940	P46940	IQGA1_HUMAN	IQGAP1	64596.6	66481.2	67293.4	69232.7	52888.9	49151.1	94647.1	92425.3	53160.7	60123.5
Q8NDC0	Q8NDC0	MISSL_HUMAN	MAPK1IP1L	64493.1	70459.8	117276	111772	3676.95	1859.23	233760	195260	8536.18	8647.09
P51580	P51580	TPMT_HUMAN	TPMT	64479.5	58278.6	29417.5	34460.1	39994	40807	60447.2	57166.7	2568.92	4069.15
P35998	P35998	PRS7_HUMAN	PSMC2	64224.3	62531.5	124096	130769	67159	63331.2	73289.5	68936.4	92283.9	90292.9
P62906	P62906	RL10A_HUMAN	RPL10A	64074.5	60493.1	108354	115684	59588.9	56749.3	72481.4	63880.7	93068.4	87499.4
Q9Y265	Q9Y265	RUVB1_HUMAN	RUVBL1	63979.8	61724.1	96211.3	98016.5	57397.9	59718	83789.4	77607.3	90595	77355.6
P60228	P60228	EIF3E_HUMAN	EIF3E	63973.3	59673.7	66350.1	78368.7	39802.5	42931.6	47623.4	54226.4	30236.5	30550.9
Q96CW1	Q96CW1	AP2M1_HUMAN	AP2M1	63936.5	62577.9	47221	50799.1	56707.4	58447.1	68228.8	57418.3	49711.4	43380
Q03135	Q03135	CAV1_HUMAN	CAV1	63898.5	65312.2	37236.7	43861.9	19989.2	19284.2	46541	42268.8	218918	227410
P60174	P60174	TPIS_HUMAN	TPI1	63776.1	65272.4	88836.5	71896.1	54001	56733.9	100363	100749	31291.8	30026
P83881	P83881;Q969Q0	RL36A_HUMAN	RPL36A	63709.6	59525	40339.1	57531	58138.4	64981.3	67842.7	57225.5	82326.2	76916.8
P28482	P28482	MK01_HUMAN	MAPK1	63679.2	68153	46661.4	52348.1	88532.3	89914.6	67550	63788.6	81595.6	94299.7
Q9HB63	Q9HB63	NET4_HUMAN	NTN4	62934.4	68194.6			47066.4	52868.8	39208	36715.9	24938.1	29556
P20774	P20774	MIME_HUMAN	OGN	62830.3	62094	20382	18942.1	54257.8	47884	26238.6	19367.5	55250.7	47581.4
P04066	P04066	FUCO_HUMAN	FUCA1	62804.3	78033.7	39178.1	46709.6	80641.1	66291.7	62237.4	65379.7	130131	102040
Q9UL03	Q9UL03	INT6_HUMAN	INTS6	62725	46191.5	53183.1	55260	107245	79762.6	24957.9	16242.9	572402	586713
Q02818	Q02818	NUCB1_HUMAN	NUCB1	62620.1	60132.1	13490.6	12989.3	34105.2	35284.8	50700.3	44493.3	47464	46743.7
Q13228	Q13228	SBP1_HUMAN	SELENBP1	62600.6	67537.2	17043.7	20474.3	59098.7	60868.9	45550.8	46634.9	37022.9	40467
Q96N76	Q96N76	HUTU_HUMAN	UROC1	62307	64443.5	38447.5	32985.7	62539.8	61947.9	66019.6	56263.9	56339.4	49263.6
P31944	P31944	CASPE_HUMAN	CASP14	62295.4	62912.9	52221.8	25642.7	23290.1	17582.6	92051.7	109237	3914.16	15561.5
P46459	P46459	NSF_HUMAN	NSF	62171.8	60056.6	52392.1	54565.2	56730.6	56078.4	69156.9	66577	60500.7	53316.8
Q9NP72	Q9NP72	RAB18_HUMAN	RAB18	62115.9	60173.7	34502.6	37268.8	46611.8	43909.6	74387.2	75640.4	30727.3	33754.2
Q86VE9	Q86VE9	SERC5_HUMAN	SERINC5	61986.4	64121.7	65763.8	70212.8	5747.78	11514.3	17397.5	19877.7
Q08722	Q08722	CD47_HUMAN	CD47	61790.6	57385.6	31936.6	35125.1	48559.7	47408.2	82835.9	84218.6	67575.2	75850.3
Q5T447	Q5T447	HECD3_HUMAN	HECTD3	61722	57528.9	26426.9	28950.7	54821.6	58456.5	41265.3	37583.8	45647.9	48091.8
P09488	P09488	GSTM1_HUMAN	GSTM1	61651.7	61097.4	17118.6	20381.7	35238.3	47424.4	39930.1	38340.2
P28066	P28066	PSA5_HUMAN	PSMA5	61497	56910.6	37650.6	41502.3	63951.3	64221.6	87841.8	95792.3	41755.5	48440.9
Q9NR50	Q9NR50	EI2BG_HUMAN	EIF2B3	61223.5	45101.7	60706.9	56617.8	50419.2	53859.2	41267.9	59952.9	55695.1	50234.9
Q7LDG7	Q7LDG7	GRP2_HUMAN	RASGRP2	61065.8	60603.4	23206.2	32883	77788.5	82590.8	41102.6	47461	53560.2	70686.3
P41252	P41252	SYIC_HUMAN	IARS1	61025.2	60541.5	147158	157179	51184.7	50831.5	77930.8	74771.8	88244.2	88724.8
Q01433	Q01433	AMPD2_HUMAN	AMPD2	61008.1	66375.4	41275.8	45451.8	74384.9	73780.9	55905.4	56855.9	68181.5	66716.8
Q9Y223	Q9Y223	GLCNE_HUMAN	GNE	60979.6	63548.9	46524.8	52952.2	75632.9	71557.7	71635.9	68663.5	81543.9	78890.1
P35030	P35030	TRY3_HUMAN	PRSS3	60848.3	69669	29459.6	36486.7	98827.5	102832	91078.2	128584	92464.3	113295
O95248	O95248	MTMR5_HUMAN	SBF1	60673	60116.7	88896.1	92567.9	71984.8	56818.5	60659.4	67221.9	97542.5	95908.5
B9A064	A0M8Q6;P0CF74;P0CG04;P0DOY2;P0DOY3;B9A064;P0DOX8	IGLL5_HUMAN	IGLL5	60662.6	52303.5	47472.9	16351.6	27006.3	15720.4	69173.1	87774	27051.1	46601.5
Q9NZA1	Q9NZA1	CLIC5_HUMAN	CLIC5	60520.2	57081.9	38519	40268.8	38504.5	41965.3	39350.6	40531.7	29298.8	37651.2
P50552	P50552	VASP_HUMAN	VASP	60436.6	57234.7	49255.6	49228.1	81621.4	75973.9	54230.6	60355.4	54917.7	55502
P49591	P49591	SYSC_HUMAN	SARS1	60324.3	66155.4	69476.2	80201.3	72307.8	68536.3	51280.9	53346.2	73146.1	77179.7
P62913	P62913	RL11_HUMAN	RPL11	60248.7	55718.3	108297	108873	36255.7	41000.5	69394.8	71422.2	66407	66855.7
Q9C0H2	Q9C0H2	TTYH3_HUMAN	TTYH3	60140.6	66404.4	43225.9	44191.8	12938.4	12763.9	97350.4	91901.2	30413.5	28494.1
P02458	P02458	CO2A1_HUMAN	COL2A1	59795.8	61004.7	35996.3	37741.5	53366.5	52357.1	42886.5	43777.3	71631.5	65720.5
P30153	P30153	2AAA_HUMAN	PPP2R1A	59495.3	62687.6	65075.2	67778.7	66113.7	65017.6	68595.3	72454.9	60807.4	64302.5
Q8NCM8	Q8NCM8	DYHC2_HUMAN	DYNC2H1	59445.5	93169.1	55942.4	42636.2	108973	75907.8	65169.2	77218	45667.6	2666.09
O75923	O75923	DYSF_HUMAN	DYSF	59336.8	39458.8	41462.8	52322.6			67369.1	67644.1	45438.5	17366
P62993	P62993	GRB2_HUMAN	GRB2	59286.1	57822.8	23319.1	24554.2	21652.8	20699.7	37613.8	34352.2	27509.2	18957.4
P31689	P31689	DNJA1_HUMAN	DNAJA1	59040	58918.6	63622.5	60361.5	34594.8	33546.1	70013.5	59971.4	69055.1	66477
P06748	P06748	NPM_HUMAN	NPM1	59013.7	54542.9	208282	233775	36196.9	34605	66275.9	58788.4	68340.9	67650.2
Q99613	Q99613;B5ME19	EIF3C_HUMAN	EIF3C	58825.4	64656.2	111764	106285	56883.4	52528.5	53551.4	47254.2	56623.1	57790.4
P21589	P21589	5NTD_HUMAN	NT5E	58694.9	58559.1	8501.67	8323.64	21606.6	20803.6	11294	9555.14	185244	198270
Q9BXN1	Q9BXN1	ASPN_HUMAN	ASPN	58532.5	57524.8	46551.6	45678.9	63777.7	66244.5	37277.9	34117.5	42555.9	45375.3
P30039	P30039	PBLD_HUMAN	PBLD	58500.8	54114.3	27396.1	26968.6	67893.2	63906.4	49726.2	56963.4	54461.3	58440
P29317	P29317	EPHA2_HUMAN	EPHA2	58341.1	56800.4	51473.9	53271.6	16106.8	17326.1	13913.4	13170.1	50768	47567.2
P0DP23;P0DP24;P0DP25	P0DP23;P0DP24;P0DP25	CALM1_HUMAN;CALM2_HUMAN;CALM3_HUMAN	CALM1;CALM2;CALM3	58325.6	59614.3	69175	67283.2	79846.6	59724.3	62521.6	77641.6	57993.3	74193.5
P06702	P06702	S10A9_HUMAN	S100A9	58247.1	63435.3	130178	26861.6	25104.9	15246.6	69303.5	74452.1	4205.63	2217.52
Q9Y570	Q9Y570	PPME1_HUMAN	PPME1	58221.7	70489.6	108661	109228	55849.2	60662.4	67831.9	67967.8	62404.9	93044.5
Q9H9T3	Q9H9T3	ELP3_HUMAN	ELP3	58191.9	54217.7	79806	84174.8	64001.5	64785.5	62637.3	57761.3	69053.4	76688
Q15404	Q15404	RSU1_HUMAN	RSU1	58131.4	56577.5	33292.5	26754.8	42800.2	40118.8	61898.4	57039.9	44568.7	43933.1
P54920	P54920	SNAA_HUMAN	NAPA	58024.3	55008.2	42858.5	44436.9	50507.8	51833.4	76061.7	74767.1	48470.6	48938.9
O94979	O94979	SC31A_HUMAN	SEC31A	58003.8	59639.7	36919.8	38803.8	61635	63039.5	186215	193017	50444.1	51100
P06132	P06132	DCUP_HUMAN	UROD	57684.9	58336.5	37662.5	40881.6	73934.8	61915.8	69850.8	61365.6	85360.8	79764.9
O75897	O75897	ST1C4_HUMAN	SULT1C4	57680.6	65837	24155.8	42767.2	121770	108054	35449.9	44413.2	8116.08	8114.62
Q9BUF5	Q13509;Q9BUF5	TBB6_HUMAN	TUBB6	57661.8	58125.8	79080.4	87955.5	61227.9	58411.9	56839.9	60461.9	47748.2	48183.6
P31153	P31153	METK2_HUMAN	MAT2A	57648.5	56725.7	61239.5	61155.2	51198.8	51356	63642.8	58999.8	67270.2	59365.3
Q7L1Q6	Q7L1Q6	5MP2_HUMAN	BZW1	57619.7	55276.3	33804.2	35948.7	30471.9	34351	35528.3	41590	32082.6	31226.2
O15144	O15144	ARPC2_HUMAN	ARPC2	57617.5	53616.3	47814.6	49834.2	52937.8	55006.4	40691.6	44380.2	76041.6	75239.2
P14868	P14868	SYDC_HUMAN	DARS1	57587.7	59876.6	115456	113544	56053.9	61817.2	67390.2	67773.9	54355.5	42672.1
P63092;Q5JWF2	P63092;Q5JWF2	GNAS1_HUMAN;GNAS2_HUMAN	GNAS	57568	59554.2	42892.4	54521	41077.2	33809.2	132355	137925	28806.7	33267.2
Q14642	Q14642	I5P1_HUMAN	INPP5A	57539.9	76837.9	52327	54932.6	50890.8	33476.7	97545.1	95425.5	52752.2	50286.2
P46777	P46777	RL5_HUMAN	RPL5	57447.6	62087	247003	233041	57689.8	52381.1	117972	96745.5	169809	156644
O43865	O43865;Q96HN2	SAHH2_HUMAN	AHCYL1	57377.7	59978.4	26978.1	29594.4	42029.4	42321	58586.8	56646.2	34333.4	32997.2
P06858	P06858	LIPL_HUMAN	LPL	57188	55517.6	29228.3	31868.1	37252.1	35823.5	111997	112197	49056.7	46902.9
P51570	P51570	GALK1_HUMAN	GALK1	57024.6	58274.9	39000.4	35223.9	93376.1	94395.6	58370.4	60058.5	57159	49344.2
Q93008	O00507;Q93008	USP9X_HUMAN	USP9X	57018.6	58361.2	46538.1	48683.5	67840.2	66655.1	47693.5	48921.6	58987.7	57563.7
Q3ZCW2	Q3ZCW2	LEGL_HUMAN	LGALSL	56967.7	57387.2	43181.8	51355.1	52581.5	51417.2	67291.9	69720.6	20407.8	18570.7
Q99961	Q99961	SH3G1_HUMAN	SH3GL1	56795.7	68033.1	32402.1	26869.7	32850	23773.4	20806.2	16615.9	136739	108846
Q5T749	Q5T749	KPRP_HUMAN	KPRP	56778.3	89599.6	60309.7	39729.2	44846.4	46998.5	165764	265012
Q06828	Q06828	FMOD_HUMAN	FMOD	56773.8	57860.6	12823.9	13368.7	46827.9	47150.7	38539	42853.5	13659.7	10273
P30041	P30041	PRDX6_HUMAN	PRDX6	56753.7	53816.7	71296.2	68840.3	44350.8	53742.1	171990	169284	31917.3	38105.7
P47756	P47756	CAPZB_HUMAN	CAPZB	56641.1	52382.3	41871.9	42373.7	51480.3	39787.8	47912.2	45864.1	51436.2	56802.8
P20338	P20338	RAB4A_HUMAN	RAB4A	56308.4	59082.9	31518	36723.7	48292.7	50248.4	65549.5	72361.9	26551.3	28806
P61163	P61163	ACTZ_HUMAN	ACTR1A	56298.8	56098.9	68556.4	73093.5	55622.3	55795.6	53130.5	52040.4	69853.5	69753.5
Q9NVA2	Q14141;Q92599;Q9NVA2	SEP11_HUMAN	SEPTIN11	56158.3	57255.1	54166.5	48495.5	66331.3	58620.9	50782	50760.8	57546.7	60642.2
Q9ULV4	Q9ULV4	COR1C_HUMAN	CORO1C	56128.6	53449.5	48659.9	54599.3	52263.8	55127.2	43149.9	41230.8	63871.4	64686.1
Q14126	Q14126	DSG2_HUMAN	DSG2	56067.1	51826.4	37508.9	39710.5	28561	12802.8	98920.7	90308.8	35199.2	35879.2
Q9UBQ0	Q9UBQ0	VPS29_HUMAN	VPS29	56060.8	54127	53276.3	46381	50324.1	48220.9	64280.8	59607.2	34604.9	52556.1
Q14314	Q14314	FGL2_HUMAN	FGL2	55994.9	49431.8	14263.7	12314.8	47490.9	54465.2	39000.7	38476.9	75608.2	62864.9
Q01518	P40123;Q01518	CAP1_HUMAN	CAP1	55819	58708.5	48031.2	50647.7	62766.2	60691.6	58763.6	60626.7	56816.7	54062.5
Q99715	Q99715	COCA1_HUMAN	COL12A1	55670.6	59049.3	12050.5	12719	1656540	1720120	126582	126091	164806	175304
P04275	P04275	VWF_HUMAN	VWF	55648.9	51968.2	21936.5	25579.9	88300.3	96529.6	40418.6	49281.1	83067	83991.3
P67870	P67870	CSK2B_HUMAN	CSNK2B	55625.3	54452.3	102011	99588.8	43397.6	49614.2	48736.6	48000.3	23165.1	26179
P62333	P62333	PRS10_HUMAN	PSMC6	55418.3	56445.5	110598	104642	52489.4	50148.3	68065.1	63170.6	90393.6	81071.5
P09417	P09417	DHPR_HUMAN	QDPR	55283.4	51625.8	32950.8	33513	44196.3	46912.7	30618.7	33722.4	47406.1	44972.2
Q9Y262	Q9Y262	EIF3L_HUMAN	EIF3L	55183	49049.9	59948.8	65972.2	29281.4	30792.9	39578.3	39726.7	27263.9	29042.8
P00326	P00326	ADH1G_HUMAN	ADH1C	55138.1	51418.4	31286.1	30178	48564.8	49130.5	40417	37850.2	5529.09	5362.73
P35606	P35606	COPB2_HUMAN	COPB2	55126.1	54956	68846.4	77908.5	50635.6	51985.8	50187.9	51145.9	53689.6	52508.4
P23297	P23297	S10A1_HUMAN	S100A1	55125.4	60816.7	31153.3	39759.2	73501.7	74858.1	50322.1	62033.5	54112.7	64164.1
P49720	P49720	PSB3_HUMAN	PSMB3	54836	58016.5	29048.1	33409.9	60972.1	56443.9	70318.9	75205	27545.6	37600.7
O75955	O75955	FLOT1_HUMAN	FLOT1	54825.5	55423.9	39077.3	38799.4	50186.9	48452.5	82013.2	80720.4	36156.7	37714.6
O00571	O00571;O15523;Q9NQI0	DDX3X_HUMAN	DDX3X	54236.8	52201.2	82523.3	87088.8	46557.3	45328.9	56197.9	55304.7	70658.3	68369.1
Q9HCU4	Q9HCU4	CELR2_HUMAN	CELSR2	54131.9	43818.9	32182.4	34117.8	66293.4	56928.7	96707.7	99402.2
P32119	P32119	PRDX2_HUMAN	PRDX2	54118	60224.7	107604	80187.4	59892.7	50064.4	149186	166507	65581.4	69632.6
Q14974	Q14974	IMB1_HUMAN	KPNB1	54048.7	52670.9	75681.4	87340.7	50133.9	49688	58835	58975.6	42179.8	46661.2
Q13247	Q08170;Q13247	SRSF6_HUMAN	SRSF6	53994.7	48080.2	43500.7	46435	43036	42168.2	28218.4	27686.1	32007.1	27058.6
P16885	P16885	PLCG2_HUMAN	PLCG2	53960.2	51618.1	36808.6	41023.3	47773.4	49269.2	48417.8	47312.6	63702.1	55372.1
P62847	P62847	RS24_HUMAN	RPS24	53893.1	57082.9	104134	94411.3	47726	50479.3	81927.4	70733.7	34726.1	33900.9
O60763	O60763	USO1_HUMAN	USO1	53874.6	54310	37129.7	38894.5	48605.3	47965.4	45745.1	47399.9	55977.3	52586.2
O94915	O94915	FRYL_HUMAN	FRYL	53846.2	57089.6	24704.2	26129.5	65183.8	67025.2	38993.9	43621.2	52377.8	52681.2
Q6ZNJ1	Q6ZNJ1	NBEL2_HUMAN	NBEAL2	53838.5	56422.5	34397.2	37737.8	66221.7	65413.6	52538.9	49678	59580	63300.7
P62910	P62910	RL32_HUMAN	RPL32	53803.5	62498.4	51485.4	56886.1	54528.3	51825.1	58021.6	67308.7	53990.7	44501.7
Q92841	Q92841	DDX17_HUMAN	DDX17	53657	48729	128937	127535	36740.6	39287.3	93764.6	81620.4	63218.4	72944.1
Q13838	Q13838	DX39B_HUMAN	DDX39B	53595.6	53014.2	90406.8	94706.7	47005.3	44686.7	55858.1	62321.8	81461	80771.4
Q9UHN6	Q9UHN6	CEIP2_HUMAN	CEMIP2	53499.4	55224.3	16390.7	19235.3	10287.9	10285.5	12647.9	13449.6	18219.3	21808.2
O43405	O43405	COCH_HUMAN	COCH	53350	55958.2	4686.11	5383.97	7894.35	6718.21
P84103	P84103	SRSF3_HUMAN	SRSF3	53286.4	60634.7	24581.7	26205.1	47061	48011	28194.9	25263	23128.5	35219.6
P38606	P38606	VATA_HUMAN	ATP6V1A	53250.6	54792.1	45847.7	44028.1	51297.4	52675.4	46031.6	45172	51921.7	57387.5
O00231	O00231	PSD11_HUMAN	PSMD11	53104.4	49263.8	96078	103798	54023	48909	58600.7	59825.8	51453.1	54546.6
Q6SZW1	Q6SZW1	SARM1_HUMAN	SARM1	52917.5	55087.1	20810.5	20952.1	53237.8	50508.7	42162.1	46726.6	28077.9	25590.5
P61626	P61626	LYSC_HUMAN	LYZ	52910.1	56231.6	27437.8	20291.5	21537.8	5496.52	111424	132836	5633.03	5362.08
Q9H9H4	Q9H9H4	VP37B_HUMAN	VPS37B	52845.7	47676.4	48883.1	50266.5	16092.4	16351.2	63982	72437.9	69867.4	70930
P00450	P00450	CERU_HUMAN	CP	52768.8	44844.1	18116.1	18309.5	38655.5	37624.9	29173.4	27702	30227.7	29778.8
P52333	P52333	JAK3_HUMAN	JAK3	52738.9	56099.2	22197.9	26238.2	59896.4	56662.5	51401.1	48866.6	61619.4	59520.3
O95832	O95832	CLD1_HUMAN	CLDN1	52507.9	55944.7	35194.1	47034.7	12611.5	14996.1	2290.42	4748.57	5834.35	7320.32
P63173	P63173	RL38_HUMAN	RPL38	52313.9	51613.8	39282.5	33849.1	21683.8	18669.6	64626.3	51782.8	18844.3	13812.7
P61247	P61247	RS3A_HUMAN	RPS3A	52271.7	49322.3	105087	97093.6	38367.3	37392.8	63145.2	62250.4	52673.9	50776.9
P50225	P50225;P50226	ST1A1_HUMAN	SULT1A1	52255	38217.6	20612.5	21890.5	55401.2	65717.8	27418.9	23079.3	64640.6	68922.4
O43707	O43707	ACTN4_HUMAN	ACTN4	52253.2	52893.5	127904	133726	33771	30075.2	47168.3	46718	31550.5	31481
P25787	P25787	PSA2_HUMAN	PSMA2	52223.6	55180	30311	31548.8	57083.5	49552.8	80398.4	83491.4	39896	46287.9
Q99832	Q99832	TCPH_HUMAN	CCT7	52111.1	51940.3	157271	159094	38126.5	35810.5	86747.2	77929	59992.3	65277.3
Q14254	Q14254	FLOT2_HUMAN	FLOT2	52031.9	48810.2	34851.3	35131.3	48533.9	42351.1	73894	74916.9	31419.4	31249.1
Q6PCB0	Q6PCB0	VWA1_HUMAN	VWA1	51934.9	49059.8	12222	12176.1	55607.1	55034.5
O43149	O43149	ZZEF1_HUMAN	ZZEF1	51884	52142.9	24308.7	26647.7	54750.6	55204.8	35225.5	36833	45722.3	44955.9
O95372	O95372	LYPA2_HUMAN	LYPLA2	51848	50538.1	31059.1	33214.2	44711.8	45859.3	37676.4	41469.5	60889.2	65617
Q12882	Q12882	DPYD_HUMAN	DPYD	51749.2	53551	22591.6	24268.2	53175.1	55536.1	30758.4	30788.1	44998	47262.8
P20908	P20908	CO5A1_HUMAN	COL5A1	51709	55864.9	6791.31	6542.42	120203	116892	25978.8	21508.9	18857	13071
P62854	P62854;Q5JNZ5	RS26_HUMAN	RPS26	51600.9	51780	55682.9	50889.9	56335.2	54988.3	60840.9	75054.8	19525.8	20225.7
P61970	P61970	NTF2_HUMAN	NUTF2	51270.8	53503.4	33309	31927.3	59741.4	71611.8	42909.3	60665.2	63579.3	61464.7
Q9P2S5	Q9P2S5	WRP73_HUMAN	WRAP73	51232.8	44891.6	35546.5	48632.9			38707.4	50294
P05026	P05026	AT1B1_HUMAN	ATP1B1	50946.1	49828.2	32028.6	35662.2	16748.7	17776.6	95447.5	99390.7	11947	8482.13
O00303	O00303	EIF3F_HUMAN	EIF3F	50937.7	44621.3	52948.5	52949.7	29825.7	29226.5	42924.9	44386.6	19577.9	18702.9
Q9Y6G9	Q9Y6G9	DC1L1_HUMAN	DYNC1LI1	50928.9	51232.5	63362.4	60697.8	64435.7	49518.9	45273.5	40137.9	60683.1	60263.9
Q8NBM8	Q8NBM8	PCYXL_HUMAN	PCYOX1L	50910.3	50845	28611.8	31606.3	45358.3	43000.7	45938.2	41174.8	22068.5	24553.3
P25311	P25311	ZA2G_HUMAN	AZGP1	50823.8	53660.2	35608.2	18509.8	24766.4	17578.1	65447.9	81495
O00487	O00487	PSDE_HUMAN	PSMD14	50781.5	48513.4	90088.5	97303.3	54382.2	55353.4	68545.5	70720.7	87693.5	69559.8
P24666	P24666	PPAC_HUMAN	ACP1	50724.6	54029	64300.8	63605.4	53596.1	59295.8	75927.9	72891	56119.4	38747.5
P05546	P05546	HEP2_HUMAN	SERPIND1	50662.9	58028.2	17415.2	18132.2	73425.1	66157	38525.5	55260	119775	142376
P20020	P20020;P23634	AT2B1_HUMAN	ATP2B1	50638	55235.9	33512.3	34152.7	31738.7	30075.3	109422	104742	28466.7	26315.5
Q8WUX1	Q8WUX1	S38A5_HUMAN	SLC38A5	50633.8	48600.3	103466	113610	25613.9	32200.6	48844.6	47814.4	4138.94	4984.69
Q9UNF0	Q9UNF0	PACN2_HUMAN	PACSIN2	50567.8	46886.3	14557.2	14496.4	16314.1	15319.2	16096	16952.7	29221	34564
P62266	P62266	RS23_HUMAN	RPS23	50487	48201.5	62693.8	63700.3	43485.1	40724.3	57901.2	51181.2	19184.9	17580.9
Q9Y639	Q9Y639	NPTN_HUMAN	NPTN	50448.8	48757.2	33064.3	31330.4	24664.6	26203.1	91956	98802.9	18658.6	18497.3
P28300	P28300	LYOX_HUMAN	LOX	50191.8	43824	16969.7	24496	152123	172672	74757.9	77225.7	97791.1	118624
P05997	P05997	CO5A2_HUMAN	COL5A2	50108.1	51228	3563.57	3916.39	68868.8	73236.2	6885.05	5927.96	5693.73	9724.8
Q16850	Q16850	CP51A_HUMAN	CYP51A1	50069.5	55341.5	16801.8	17831.1					18687.9	52886.1
P02462	P02462;P29400	CO4A1_HUMAN	COL4A1	50062.3	45182.6	5480.2	5730.43	199795	202329	38016.7	32954.1	26105.3	19188.1
P31943	P31943	HNRH1_HUMAN	HNRNPH1	50029.7	50447.2	90691.3	95347.5	38683.6	40530.7	71676.9	71661.7	60529.6	62738.9
Q9HCB6	Q9HCB6	SPON1_HUMAN	SPON1	50005.1	52734.6	20664.5	18508.6	32279	33131.4	36563	30497.5	17205	17840.6
P61978	P61978	HNRPK_HUMAN	HNRNPK	49968.7	48899.7	123740	126856	42615.1	42104.6	63017.6	63890.1	43958.1	52435.9
P30050	P30050	RL12_HUMAN	RPL12	49956.5	46061.1	68229.2	61762.6	37404.9	43510.5	54912.7	51414.2	57367.1	49564.9
Q02809	Q02809	PLOD1_HUMAN	PLOD1	49886.3	51309.5	19031.9	19611.8	26197.7	27678.1	34810.3	34892.5	42786.2	45620
P42677	P42677;Q71UM5	RS27_HUMAN	RPS27	49489.6	52060.9	93796.5	93963.5	32971.4	32472.4	59319.1	60628.7	46294.7	53642.8
P07602	P07602	SAP_HUMAN	PSAP	49123	55897.9	5514.71	6741.39	6953.74	8525.31	21464.9	29025.8	10340.4	10560.4
P42224	P42224	STAT1_HUMAN	STAT1	49032.1	51358.6	45228.4	46807.2	51907.4	51490.3	38021.2	39457.7	47837.6	53141.8
Q9NR45	Q9NR45	SIAS_HUMAN	NANS	48947.3	46475.5	62151.7	64592.1	54055.2	46425	50654	50730.6	61014.3	59452.3
Q05BV3	Q05BV3	EMAL5_HUMAN	EML5	48914.4	40266.6	89569.7	100635	30474.6	35802.3	72663.7	63402.7	79681.6	80134.2
O43242	O43242	PSMD3_HUMAN	PSMD3	48786.4	47452.3	95189.4	100421	44802.5	44360.2	63564.7	62716.5	54639.9	64200.3
Q9UNF1	Q9UNF1	MAGD2_HUMAN	MAGED2	48776.5	49147	25896.2	25680.6	49948.7	43225	42655.9	37889.5	38643.6	42040.8
Q96EY5	Q96EY5	MB12A_HUMAN	MVB12A	48743.7	49032.9	65503.1	73480	9511.85	10060.6	91773.9	83861.3	60769.3	63410.4
P28161	P09488;P28161;Q03013	GSTM2_HUMAN	GSTM2	48645.9	46474.2	18005.5	18893.8	48209.3	47826.1	31226.9	29664.1	19667.3	22161.4
Q7Z5G4	Q7Z5G4	GOGA7_HUMAN	GOLGA7	48516.7	44950.8	40000.4	44848.1	23170.8	26693.6	66772.2	79258.9	13241.3	13534
P50454	P50454	SERPH_HUMAN	SERPINH1	48450	50415	36028.5	35252.2	49846.4	48698	43123.5	38508.3	54824.8	53457.8
Q9UNN8	Q9UNN8	EPCR_HUMAN	PROCR	48270.1	43042.6			4727.8	4199.57	29923.9	28386.5	55937.2	52506.1
Q3YBM2	Q3YBM2	T176B_HUMAN	TMEM176B	48232.3	43346.3	1057.63	663.966			696650	881154
P78509	P78509	RELN_HUMAN	RELN	48197.5	49329.9	29237	30549.4	92485.3	89524.6	25253.1	26113	56344.5	51930.3
O15371	O15371	EIF3D_HUMAN	EIF3D	48055	46166	79874	74231	36988.3	38226.5	44177	41128.4	30093.4	31479.6
P30566	P30566	PUR8_HUMAN	ADSL	47944.1	57426.7	49859.7	55027.5	58371.3	53474.8	48892.1	49675.1	57290.3	43940.8
O75144	O75144	ICOSL_HUMAN	ICOSLG	47938	52013.2	12554.7	12307	42267.6	44071.7	39578.2	38719.3
P30043	P30043	BLVRB_HUMAN	BLVRB	47812.8	50325.9	22536.8	17974.4	80299.7	78525.4	34934.2	29576.2	43368.4	43190.7
P26927	P26927	HGFL_HUMAN	MST1	47739.2	42490.6	17254	19037.3	47069.1	48054.9	31604.3	33948.9	31902.3	36507.3
P09871	P09871	C1S_HUMAN	C1S	47705.2	46542			5392.25	5848.44	3943.88	4024.77
Q93052	Q93052	LPP_HUMAN	LPP	47353.9	37140.8	26351.8	31318.3	52199.3	66215.4	60270.2	60124.4	50415.8	50221.8
Q7L2H7	Q7L2H7	EIF3M_HUMAN	EIF3M	47303.2	47682.8	59387.7	73828.5	43673.1	38460.4	27462.2	34090	27730.4	30104.6
Q15393	Q15393	SF3B3_HUMAN	SF3B3	47232.4	50194.8	113723	110671	17997.5	17392.6	49952.6	53281.3	28608.7	27327.6
P02787	P02787	TRFE_HUMAN	TF	47217.2	46945	11960.6	11502.8	30855.1	27627.7	57549.3	58511.2	17503	19960.3
O15431	O15431	COPT1_HUMAN	SLC31A1	47103	52432	45828.4	44413.6	24265.1	25025.6	107281	85196.9	29936.2	43765.5
P61081	P61081	UBC12_HUMAN	UBE2M	47007.4	47441.7	57615.6	61121.7	44790.7	44893.1	51319.9	45436.5	30688.9	29476.9
Q96QK1	Q96QK1	VPS35_HUMAN	VPS35	46919.2	46441.1	47485.4	52207.6	50293.9	48472.1	51173.5	51620.1	42338.7	47568.5
P50991	P50991	TCPD_HUMAN	CCT4	46910.4	45697.1	170876	175247	37936.3	36815.4	83645.2	74108.7	93212.8	84839.4
O75829	O75829	CNMD_HUMAN	CNMD	46743.3	54418.1	36010.7	44501.3	79396.5	87431.7	39574.8	43812	142222	122796
P62195	P62195	PRS8_HUMAN	PSMC5	46558.2	44873	75644.7	79298.6	47150.5	47234.6	48855.5	50356.5	73141.4	71608.4
Q8WWZ8	Q8WWZ8	OIT3_HUMAN	OIT3	46542.7	44123.5	24897	25832.3	52607	57279.9	38786.9	35023.6	43376.6	42052
Q9BT78	Q9BT78	CSN4_HUMAN	COPS4	46521.2	46102.4	40215.3	44315.4	42620.1	41764.3	44680.6	43932.4	50301.8	47704.8
O00203	O00203;Q13367	AP3B1_HUMAN	AP3B1	46398.2	45601.2	27144.8	28791.6	49943.1	52048.4	35130.4	36953.8	38284.5	40245.4
Q9NQ84	Q9NQ84	GPC5C_HUMAN	GPRC5C	46361.2	46516.4	36267.5	39204			74874.7	85843.4	11847.2	15331.7
P26447	P26447	S10A4_HUMAN	S100A4	46348.6	44157.3	107347	113321	19741.7	19607.3	84554.6	85545.6	4635.97	3479.95
O43776	O43776	SYNC_HUMAN	NARS1	46250.9	49224	48385.2	53922.5	53267.6	50107.9	50346.3	52233	49106	51126.5
Q3SY69	Q3SY69	AL1L2_HUMAN	ALDH1L2	46208	37525.6	23918.8	25197.5	31647.9	36884.4	24958.3	26563.9	10975.5	13411.6
Q96TA1	Q96TA1	NIBA2_HUMAN	NIBAN2	46123.8	41758.9	50404.9	49818.2	42516.2	41085.3	44619	46449.3	50718.1	47250
Q04917	Q04917	1433F_HUMAN	YWHAH	46122.3	39154	49168.5	51906	35492.3	32031.3	57204.8	51695.7	34192.9	31686.1
Q15008	Q15008	PSMD6_HUMAN	PSMD6	46038	47439.5	105399	118285	49234.8	47487.3	65202.1	67151.5	69487	73582
Q9BZL6	O94806;Q9BZL6	KPCD2_HUMAN	PRKD2	45953.4	44687.7	27682.3	32829	49307.6	47277.9	36599.3	34824.5	58950.4	57097.6
Q8WWI5	Q8WWI5	CTL1_HUMAN	SLC44A1	45785.5	47369.9	34054.1	38599.8	34092	40021.2	56970.1	57832.8	28715.9	34149.2
Q05682	Q05682	CALD1_HUMAN	CALD1	45644.6	41416.8	22063.7	23361	58104.7	57446.7	32798	30230.6	46981.8	46580.3
O00754	O00754	MA2B1_HUMAN	MAN2B1	45626	40166.3	22283.7	22377.3	37312.9	40808.2	50881.3	55642.8	30144.9	34480.9
O60888	O60888	CUTA_HUMAN	CUTA	45580.4	45538.9	15875.9	17796.6	46704.7	38317.6	37450.4	42090.1	24169.5	27385.6
P30408	P30408	T4S1_HUMAN	TM4SF1	45504.1	62238.4	8735.04	8938.81	5234.36	4957.12	86659	132949	6144.53	7267.17
P00451	P00451	FA8_HUMAN	F8	45447.8	51291.8	26695.1	32032.5	54059.5	62240.2	32178.9	35716.8	48038.8	40881.7
P02671	P02671	FIBA_HUMAN	FGA	45422.4	42025.7	22308.1	28107.8	51596.8	41789	36780.5	38586.9	42805.5	40800.6
P24592	P24592	IBP6_HUMAN	IGFBP6	45397.6	37192.5	15650.4	18965	20609.3	21528.8	19677.3	18630	57514.6	51372.8
P00533	P00533	EGFR_HUMAN	EGFR	45396.5	45337.4	14036.9	15219	10100.1	11103.5	36373.5	35816.8	16462	16494.6
Q9UHD8	Q9UHD8	SEPT9_HUMAN	SEPTIN9	45331.9	45466.8	52852.9	49841.5	43164	45930.9	47550.8	43663.3	54247.8	51693.6
P01876	P01876;P01877;P0DOX2	IGHA1_HUMAN	IGHA1	45235.8	41049.8	12153.5	11095.6	21412.7	12026.9	48392	57883.1	6386.23	31559.8
P50895	P50895	BCAM_HUMAN	BCAM	45145.6	43552.2	29447.2	36486.5	20099.9	23796.1	50543.5	49389.2	19739.5	25369.1
P23921	P23921	RIR1_HUMAN	RRM1	45131.7	45717.8	37958.9	42869	43104.5	43559.5	55541.6	54463.3	45938.8	50196.6
Q14376	Q14376	GALE_HUMAN	GALE	45038.2	45858.5	35351.8	37720.4	55171.8	43606.3	37546.5	37349.2	12043.7	19011.2
O14818	O14818	PSA7_HUMAN	PSMA7	44978.6	48859.8	32624.1	29899.7	48061.3	45745	66854.9	81120.2	43226.3	47326.9
Q9NRX5	Q9NRX5	SERC1_HUMAN	SERINC1	44916.2	42961.4	21632.1	25395.3	38409.3	40403.8	101192	119982	24718	23122.4
P53621	P53621	COPA_HUMAN	COPA	44882.9	44846.9	63441.2	68287	45830.1	44236.9	41005.6	42074.8	44015.8	40864.5
P61254	P61254;Q9UNX3	RL26_HUMAN	RPL26	44861.9	48761.1	58388.9	53200.8	41335	48077.8	53760.3	53165	35733.2	50731.5
Q8WTV0	Q8WTV0	SCRB1_HUMAN	SCARB1	44740.6	47224.5	37095.7	46840	7350.13	9646.48	103622	114345	30667.8	24931.6
P09486	P09486	SPRC_HUMAN	SPARC	44724.5	42525.2	11980.9	14571.7	72187.9	75722.4	23528.7	22446.4	37878.4	38967.5
O00187	O00187	MASP2_HUMAN	MASP2	44649.8	41448.5	42260.7	41378.4	59252.2	43758	31087.7	34864.3	28478.9	23589.9
Q9NPH2	Q9NPH2	INO1_HUMAN	ISYNA1	44612.1	43657.1	20629.1	23435.9	40328.3	44119.7	32460.5	33212.4	20840.3	22334.9
Q02388	Q02388	CO7A1_HUMAN	COL7A1	44601.1	46132.6	1441.33	1379.46	22238.3	22467.1	18170.9	13641.2	5574.14	4115.92
Q92769	Q92769	HDAC2_HUMAN	HDAC2	44574.8	43745.8	99589.8	96593.3	35761.5	33165	64434.2	58297.6	40732.5	28328.9
Q5TBA9	Q5TBA9	FRY_HUMAN	FRY	44457.9	44262.4	18878.3	21265.2	52821.2	54276.1	34236.9	35184.6	34430.7	33545.4
Q96EK6	Q96EK6	GNA1_HUMAN	GNPNAT1	44397.5	38643.2	28017.5	30304.2	46130.3	44486.8	43282.9	46231.6	16985.5	19184.7
Q96D15	Q96D15	RCN3_HUMAN	RCN3	44383.1	43609.3	9039.75	8987.98	45219.2	39375.5	24314.9	25224.4	37348.2	36658.4
O95045	O95045	UPP2_HUMAN	UPP2	44355	44782.4	26929.3	27717.5	33976.9	34941.4	37149.2	32793.8	23416.2	21673.8
P08754	P08754	GNAI3_HUMAN	GNAI3	44317.5	50120.8	53777.7	49361.3	22652.6	22795.4	148396	145711	29052	23726.1
P11021	P11021	BIP_HUMAN	HSPA5	44194.8	40783.8	45235.4	35853.6	37232.4	37442.4	49982.5	46252.3	114254	111166
P43686	P43686	PRS6B_HUMAN	PSMC4	44145.5	42936.3	83642.6	83836.8	43227.2	43062	49077.7	48772.4	61513.9	65802.3
P07093	P07093	GDN_HUMAN	SERPINE2	44029.2	45533.7	1116.24	1309.95	8516.81	8163.23	5437.66	5483.91	11792.2	10151.4
Q16401	Q16401	PSMD5_HUMAN	PSMD5	43921.1	46389.7	40633.2	39629.3	46602	49897.2	40537.5	44938.2	36409.9	38523.8
P51159	P51159	RB27A_HUMAN	RAB27A	43915.2	44799	21422.6	25176.7	29504	31756.1	64106.5	65104	18935.8	15479.3
P15311	P15311	EZRI_HUMAN	EZR	43741.7	41831.9	72605.7	63110.2	22893.7	24391	80709	72837.6	29821.9	31723.4
O15143	O15143	ARC1B_HUMAN	ARPC1B	43713.8	52083	41891.7	48237.2	51614.1	46246.1	38010.6	36057	41872.5	46868.8
Q15029	Q15029	U5S1_HUMAN	EFTUD2	43636.4	43916.7	69854.5	70972.2	18078.9	19114.3	24931.2	26319.7	30634.7	32513.6
P33151	P33151	CADH5_HUMAN	CDH5	43522.9	45944	11669.5	12715.3	52292.9	50536.4	24633.7	26313	13979	16618.4
Q8TD19	Q8TD19	NEK9_HUMAN	NEK9	43433.6	44036.2	30702.5	34549.7	45442.9	44350.6	36011.4	35637.8	42816.9	45031.3
P38919	P38919	IF4A3_HUMAN	EIF4A3	43413	41865.3	69634.1	83858.3	29089	31578.1	47463.5	53915.2	56591.8	54003.3
P21281	P21281	VATB2_HUMAN	ATP6V1B2	43377.7	42120.1	32794.9	30407.7	43854.8	43732	36334.7	35625.3	46361	39206
O95782	O95782	AP2A1_HUMAN	AP2A1	43116.5	41316.2	36809.6	38816.6	32401.3	34372.3	45112.1	45901.6	31665.4	34121.7
Q13201	Q13201	MMRN1_HUMAN	MMRN1	43097.3	44418.7	12134.6	9190.37	94089.3	83518.2	27985.4	31059.1	23843.8	28401.7
P78417	P78417	GSTO1_HUMAN	GSTO1	43084.4	47581.2	36080.4	33556.9	32979.1	41585.1	35197	42932.5	48150.2	37456.3
P22692	P22692	IBP4_HUMAN	IGFBP4	43054.8	45562	12378.7	11680.2	25428.5	25301.8	17009.4	15757.4	18061.7	13070.5
Q96QD8	Q96QD8	S38A2_HUMAN	SLC38A2	43027.3	39790.6	43954.2	48723.9	19748.7	18591.6	151836	165563	38991.9	42485.5
P05387	P05387	RLA2_HUMAN	RPLP2	43022.3	41542.6	20222.6	24569.9	27955.8	19879.8	17845.8	17460.8	27756.4	32433.9
P11234	P11233;P11234	RALB_HUMAN	RALB	43018.4	45506.9	43802.4	43498.1	28186.2	26696.9	56000.9	54382.3	34200.5	38503.2
P51665	P51665	PSMD7_HUMAN	PSMD7	42913.1	41102.5	81143.2	78331.7	39570.6	43551.8	43945	43580.5	52436.3	56603.3
O75165	O75165	DJC13_HUMAN	DNAJC13	42906.8	40262.1	28775.3	28667.7	41579.4	41977.2	38161.7	37455.6	36528.4	36448.7
Q9UPN4	Q9UPN4	CP131_HUMAN	CEP131	42839.8	25748.8	13835.2	12650.5	31210.7	27569.4	58426.7	42755.2	57818.5	45284.8
P13671	P13671	CO6_HUMAN	C6	42758.9	43181.5	18226.4	23382	50521.3	47920.3	38425.7	33188	8284.26	9383.12
O95340	O95340	PAPS2_HUMAN	PAPSS2	42755.4	41085.5	22259.2	25746	39073.2	43807.2	41033.1	40197	49392	48827.9
P55259	P55259	GP2_HUMAN	GP2	42725.3	41933.7	3880.83	6186.08	20676	21296.7	90754.4	107402	3152.15	4119.89
Q02878	Q02878	RL6_HUMAN	RPL6	42709.5	45474.1	59599.1	52375	28638.7	34794.2	51231.9	56228.8	34390.1	43116.2
P43034	P43034	LIS1_HUMAN	PAFAH1B1	42672.6	42122.5	55771.1	53201.6	43612.8	43334	47064	46497.9	56230.8	53643.6
P40925	P40925	MDHC_HUMAN	MDH1	42670.9	41947.8	42152	47396.3	27092.9	28335.8	71014.2	65856.1	29514.7	27869
O00194	O00194	RB27B_HUMAN	RAB27B	42526.9	39885.6	26545.6	23224.2	23246.6	22614.2	84240.9	78784.1	13810	8846.1
P06756	P06756	ITAV_HUMAN	ITGAV	42457.8	43602	21930.5	23588.7	15825.5	15826.9	38507.5	41081.8	24975.6	26407.6
O15347	O15347	HMGB3_HUMAN	HMGB3	42434.5	83007.5	5593.29	6187.69	18376.9	19404.4	6284.54	7190.18
P14550	P14550	AK1A1_HUMAN	AKR1A1	42422.5	48806.1	27821	28030.5	50687	46947.8	30655.7	33671.7	34022.2	33324.9
P28070	P28070	PSB4_HUMAN	PSMB4	42339.8	42107.1	26846.7	25255.6	45236.3	46512.8	60413.5	67682.1	29159.9	40357.1
P62256	P62256	UBE2H_HUMAN	UBE2H	42288.1	40275.8	5749.68	5062.62	63508	68036.7	20847.2	19711.2	6428.28	4936.63
O76074	O76074	PDE5A_HUMAN	PDE5A	42218.1	43633.5	21440.4	23056.8	45543.2	43484.1	31809.1	36300.6	36442.3	36739.7
Q14152	Q14152	EIF3A_HUMAN	EIF3A	42201.6	44109.1	78273.3	75348	45761.1	45398.2	45566	42287.7	32116.7	33502.1
Q6YHK3	Q6YHK3	CD109_HUMAN	CD109	42193.9	43645.2	14379.2	15158.3	30548.8	29241.7	53805.6	54607.8	32559.9	34182
Q01581	Q01581	HMCS1_HUMAN	HMGCS1	42045.5	43415.9	33753.3	36975.1	40252.6	40962.6	29416.4	34386.2	36999.5	44544.4
P16671	P16671	CD36_HUMAN	CD36	42044.8	47568.3	14167.6	15880.7	45535.7	40077.6	79236.9	73511	42068.4	46829.8
Q658P3	Q658P3	STEA3_HUMAN	STEAP3	42024.8	48993.8	12982.3	12066.5	69379.9	61605.2	80225.8	74197.9	22646.5	18382.8
P62070	P62070	RRAS2_HUMAN	RRAS2	41973.2	39763.3	30328.9	34456.6	23237.8	27055.8	56486.2	63784	24259.5	24045.7
P68402	P68402	PA1B2_HUMAN	PAFAH1B2	41956	44948.4	55141.1	63130.7	33507.5	35826.3	64386	61189.9	24616.1	7510.86
Q99683	Q6ZN16;Q99683	M3K5_HUMAN	MAP3K5	41945.6	39838.5	17273.7	17557.7	43516.8	43141	27441.2	28093.2	42395	34380.1
P07947	P07947	YES_HUMAN	YES1	41862.5	39937.3	52223.8	55324.6	25046	30945.5	61312.7	61780.4	31792.6	39422.6
O14744	O14744	ANM5_HUMAN	PRMT5	41786.8	40799.4	48774.2	56709.9	41568.7	39557.9	51365.6	49700.8	48317.9	47860.5
Q9NZN4	Q9NZN4	EHD2_HUMAN	EHD2	41767.4	43351.4	15991	15965.2	32235.2	31658.2	40161.8	35276.5	46214.9	62444.3
P34096	P34096	RNAS4_HUMAN	RNASE4	41728.3	43755	47973.3	49806.5	45242.8	52191.6	41389.5	36912.8	6315.56	8999.9
P26373	P26373	RL13_HUMAN	RPL13	41705.7	40211.4	66500	53105.6	34590.1	49667.7	65264	49566.7	46700.7	36635.5
P57721	P57721	PCBP3_HUMAN	PCBP3	41678.2	39128.3	9385.09	10609.4	9236.13	7797.33	11859.8	16699.5	6522.18	6351.9
Q969P0	Q969P0	IGSF8_HUMAN	IGSF8	41619.3	40207.9	97704	97666.7	30897.1	31255.4	108105	110902	29055.5	25393.6
Q9BX97	Q9BX97	PLVAP_HUMAN	PLVAP	41576.7	37066.1	6604.17	7764.15	90145.3	85175.1	23549.8	31026.1	8519.63	7839.62
Q9UGI8	Q9UGI8	TES_HUMAN	TES	41569.4	41347.6	35299.9	35402.4	44772.5	49404.5	41796.6	42734	37303.6	37584.1
Q96G03	Q96G03	PGM2_HUMAN	PGM2	41497.5	38331.6	12974.8	15355.9	42671.1	43023.1	22909.7	24760.6	12747.8	12134.9
P01137	P01137	TGFB1_HUMAN	TGFB1	41366.9	39281.4	22916.1	23086	28399.5	27571.1	35066.6	33248.2	20798.9	21688.6
Q96FN4	Q96FN4	CPNE2_HUMAN	CPNE2	41309.7	47334.6	11703.2	13244.5	12374.1	13572.3	24149	27781.2	6209.49	7936.86
O75915	O75915	PRAF3_HUMAN	ARL6IP5	41298.4	44950.7	12525.8	13828.6	35804.3	33145.3	28444.9	25340.5	29525.2	34302.3
P31641	P31641	SC6A6_HUMAN	SLC6A6	41295.1	48216.9	18567.3	21865.9	6414.49	7077.04	20385.3	19901.9	10778.4	5110.87
Q13813	Q13813	SPTN1_HUMAN	SPTAN1	41264.6	41078.1	60809.8	63259.2	31264.4	31555.3	40040.8	40848.7	34676.1	36693.9
Q9UKZ9	Q9UKZ9	PCOC2_HUMAN	PCOLCE2	41243.6	36483.4	15355.1	17539.1	8583.39	8341.78	25726.7	28195.3	4049.43	4475.42
P50570	P50570;Q9UQ16	DYN2_HUMAN	DNM2	41157.5	41540.6	43972.5	47656	44035.5	42383.9	71204	68526.1	54521.9	48330.5
Q13347	Q13347	EIF3I_HUMAN	EIF3I	41137.3	41241.9	61449.5	64230	30335.8	26908.3	37514.6	35844.7	32176.5	29259.7
Q14117	Q14117	DPYS_HUMAN	DPYS	41120.8	43184	17456.2	17997.5	39382.3	46649.6	35800	33072.7	28259.9	35716.2
Q9BR76	Q9BR76	COR1B_HUMAN	CORO1B	41023.2	40661.4	36375.9	33337.3	44080.5	42617.9	38058	41063	61391.8	58925.9
Q96GK7	Q96GK7;Q6P2I3	FAH2A_HUMAN	FAHD2A	40947.1	40834.5	26827.3	27805.6	43057	40037.6	29955	27928.4	46750.4	46809.1
P62081	P62081	RS7_HUMAN	RPS7	40875	42577.9	77905.6	65147.1	33048.2	30457.5	65715.1	54797.9	45610.8	42726
P25789	P25789	PSA4_HUMAN	PSMA4	40796.2	43822.9	30796.7	31085.1	41845.6	35260.7	69705.1	73262.7	17151.6	26835.3
Q9NP79	Q9NP79	VTA1_HUMAN	VTA1	40606.4	36672.9	55527.8	61322.8	24317.5	24620.1	42264.8	41315.2	14592.4	16118.1
Q9Y613	Q9Y613	FHOD1_HUMAN	FHOD1	40437.1	42980.3	21862.8	24187.5	43454.5	44127.3	38964.6	33067.7	33797.9	33712.1
O60506	O60506	HNRPQ_HUMAN	SYNCRIP	40346.4	37017.7	105004	108064	30841.9	27849.8	43443.8	43816.9	41512.1	50958.2
O60610	O60610	DIAP1_HUMAN	DIAPH1	40317.7	47616.5	62869.4	61561.6	39303.7	40308.1	55780.5	55344	59895.9	61132
P48556	P48556	PSMD8_HUMAN	PSMD8	40300.9	37961.1	68713.3	64098.1	31556.8	30696.1	55469	55568	27555.8	25562.4
Q96N96	O43307;Q96N96;Q9NR80	SPT13_HUMAN	SPATA13	40217.4	48935.2	50267.5	59845	78663	67244	82325.7	29207	50602.6	26645.7
Q9NRY6	Q9NRY6	PLS3_HUMAN	PLSCR3	40193.1	40800.3	62606.4	74714.3	27094.2	33280.6	42346.5	44589.3	20834.9	16656.8
P62888	P62888	RL30_HUMAN	RPL30	40139.4	44862.1	86009.9	83291.9	29978.6	25835.7	47474.6	43777.1	35050.9	34681.5
P16403	P10412;P16402;P16403	H12_HUMAN	H1-2	40075	40951.9	30404.6	21916	32925.6	26440.7	46864.2	45486.1	18974.3	19782.4
P10301	P10301	RRAS_HUMAN	RRAS	40039.7	39321.4	13535.5	16269.7	10899.9	10338.8	17493	13881.4	10521.1	12586.9
Q86YV0	Q86YV0	RASL3_HUMAN	RASAL3	39835.2	40520.7	21201.8	20445.3	45147.8	46666.6	45268.4	40959.6	25777.6	25631.8
P48426	P48426;P78356	PI42A_HUMAN	PIP4K2A	39819.5	40046	24881.4	26573.8	27287.2	26585.8	39463.1	40539.6	22974.1	21802.2
Q92734	Q92734	TFG_HUMAN	TFG	39783.9	46091.9	32356	32322.3	52597.1	49798.3	61938.5	54765.7	44764.1	43023.3
O95197	O95197	RTN3_HUMAN	RTN3	39760.9	46807.5	7546.79	7808.07	32881.7	33706	19567.7	23345.7	15865.3	19069.9
P04920	P04920	B3A2_HUMAN	SLC4A2	39692.1	38273.4	20765.9	21896.7	26104.8	31486.8	56594	61578.8	36350.2	33176.5
O15439	O15439	MRP4_HUMAN	ABCC4	39573.6	37935	20833	23630.8	29988.4	31967.5	49271	49654.3	21571.6	18959.4
Q86Y82	Q86Y82	STX12_HUMAN	STX12	39554.4	32360.7	14885.5	15456.1	36391.8	34462.5	43654.3	44244.6	25486.2	26682.5
P61353	P61353	RL27_HUMAN	RPL27	39550.6	41189.7	46973.7	44088.4	39558.4	39298	33441.4	29911.9	47485.4	43085.1
P32969	P32969	RL9_HUMAN	RPL9P9	39512	38200.5	77056.9	83685.8	31573.6	31536.8	52680.9	44470	53476.5	49163.1
Q15833	Q15833	STXB2_HUMAN	STXBP2	39506.4	42346.9	32774.5	32244.6	25449.2	24935.5	53077.9	54165.2	30570	28314.6
O75339	O75339	CILP1_HUMAN	CILP	39438.7	40852.7	16066.6	15839.2	76432.5	71636.4	18570.6	18393	17066.8	17974
Q06278	Q06278	AOXA_HUMAN	AOX1	39365.9	38769.4	25058.3	25964.3	45237.2	44238.6	41055.9	36792.6	39677.6	41515
P03951	P03951	FA11_HUMAN	F11	39317.3	41490.8	23493.9	23041.2	40241.1	46440.3	17822.7	25365.3	70985.6	62490.7
P13807	P13807	GYS1_HUMAN	GYS1	39225	38316.5	36944.7	36512.4	42495.6	43426.1	43706.5	41246.8	39076.2	42068.4
Q13200	Q13200	PSMD2_HUMAN	PSMD2	39215.6	39405.4	76575.4	81186.1	41089.9	39431.2	48139.1	48609.3	61315.2	61538
O75954	O75954	TSN9_HUMAN	TSPAN9	39204.7	40233.5	55139	68964.6	7899.78	7797.23	29750.4	32532.9	17811.4	17104.1
Q86TG7	Q86TG7	PEG10_HUMAN	PEG10	39108.4	38836.5	20564.5	21607.9	45332.9	45702.7	38975.8	37147.7	15626.6	14464.9
Q16772	P08263;P09210;Q16772;Q7RTV2	GSTA3_HUMAN	GSTA3	39097.3	47328.1	18987.6	20610.2	50794.6	45575	22037.7	17559	41288.4	40833
Q04446	Q04446	GLGB_HUMAN	GBE1	38963.7	41774.8	20719.8	24809.3	38404.3	48685.3	21960.9	28026.8	36133.7	36070.9
P62834	P62834	RAP1A_HUMAN	RAP1A	38960.8	45494.9	30170.4	39306.7	34462.6	23960.8	60336.4	56846.1	23859.2	25203.7
Q9H0E2	Q9H0E2	TOLIP_HUMAN	TOLLIP	38958.6	42488.1	24670.4	22114.3	12475.3	13226.1	32987.5	33659.7	14216.2	13571.5
Q969S9	Q969S9	RRF2M_HUMAN	GFM2	38952	38432.2	80509.9	87700.4	41854.7	49853.8	24957.6	22270.9	18093.2	16030.7
O00429	O00429	DNM1L_HUMAN	DNM1L	38941.5	39622.6	37716.7	38148.7	43066.4	39396.8	45467.2	48176.7	38314.8	36547.5
O15067	O15067	PUR4_HUMAN	PFAS	38928.1	33946	26720.9	25540.4	35488	35695	44428.8	42671.2	29085.7	20263.3
P02511	P02511	CRYAB_HUMAN	CRYAB	38877.3	40023.5	31022.6	25948.3	42912.1	45263.5	34940.9	30219.1	56925	47034.1
P17655	P17655	CAN2_HUMAN	CAPN2	38792.7	33746.6	23489	25431.1	40426.7	38208.8	27286.6	31714.8	28651.9	28058.7
P19801	P19801	AOC1_HUMAN	AOC1	38584.3	32823	18028.6	19954.9	35014.9	38424.6	13210.8	17270.7
Q9HAV7	Q9HAV7	GRPE1_HUMAN	GRPEL1	38564.1	38121.7	60853.2	91120.3			49395.2	45881.1
Q13561	Q13561	DCTN2_HUMAN	DCTN2	38518.6	35673.1	33594.4	31596.7	45759.8	41752.8	29369.3	24915.7	32100.3	27827.7
A4D1P6	A4D1P6	WDR91_HUMAN	WDR91	38460.8	38294	18076.3	20445.4	42522.6	44579.6	29051.6	29528.1	27547	31168.2
O95352	O95352	ATG7_HUMAN	ATG7	38339.1	37553.6	36688.2	35551.8	38046.7	39234.4	41440.4	40768.2	29141.7	25891.2
P08648	P08648	ITA5_HUMAN	ITGA5	38319.3	35834.9	42228.3	45002.4	23940	24536	30476.1	28200	47518.9	54580.2
P35625	P35625	TIMP3_HUMAN	TIMP3	38288.2	46956.4	26378.3	31417.8	59053.4	68183.4	62880.3	67485	57872.7	52892.2
Q92896	Q92896	GSLG1_HUMAN	GLG1	38282.3	35108	15321.1	16764.2	20611.5	19983.6	19568.6	20574.7	25214.3	25514.6
Q9P0J7	Q9P0J7	KCMF1_HUMAN	KCMF1	38272.9	48866	27405.5	26133	45960.7	54055.9	37874.4	42638.2	36638.9	35616.2
Q5D862	Q5D862	FILA2_HUMAN	FLG2	38101.9	48318.3	41794.6	25795.9	27218	27072.6	115348	136477	1929.11	1843.89
O75533	O75533	SF3B1_HUMAN	SF3B1	38065.3	37780.4	113133	120976	15733.7	18106.1	41871.5	40394.5	30737.5	30419.3
P06576	P06576	ATPB_HUMAN	ATP5F1B	38058.3	35837.5	259492	63414	23798.1	22504.2	61395.2	62636.2	61822.4	73736.5
Q7LBR1	Q7LBR1	CHM1B_HUMAN	CHMP1B	37777.3	75331.5	63654.8	66637.5	22059.7	13119.6	67811.5	66973.6
Q01130	Q01130;Q9BRL6	SRSF2_HUMAN	SRSF2	37764.3	35923.6	17070.7	15961	28555.4	31702.7	22881.5	21500.7	27674.4	27198.3
Q92954	Q92954	PRG4_HUMAN	PRG4	37736.9	43180.4	20016.9	20129.7	68862.1	80618.7	28278.2	26432.4	47189.6	56015.3
Q96PD5	Q96PD5	PGRP2_HUMAN	PGLYRP2	37693.6	34635.2	6802.2	7766.15	30783.6	32099.2	20160.3	20797.7	34584.8	33504.2
Q8N0W3	Q8N0W3	FCSK_HUMAN	FCSK	37656.2	39621.9	18045.4	18420	39840.5	41452.7	35601.6	36229.3	24729.9	28751.3
Q15436	Q15436	SC23A_HUMAN	SEC23A	37609.3	38710.1	30079.7	31508.9	31685.6	28982.7	58304.6	54296	30136.9	30007.5
P08253	P08253	MMP2_HUMAN	MMP2	37562.6	39654.2	10189.8	10440.3	27669.4	27491.8	19081.5	22597.3	22567.8	21819
O14980	O14980	XPO1_HUMAN	XPO1	37468.6	38387.2	50206.2	54345.8	40230.9	39528.5	40989.3	39448.6	43134.3	42948.7
P22392	P22392;O60361	NDKB_HUMAN	NME2	37439.3	38785.4	50877.3	47286.2	21634.5	23932.7	67298.3	68108.8	16314.6	16327
Q9ULL8	Q13796;Q9ULL8	SHRM4_HUMAN	SHROOM4	37376.4	33292.5	29857.7	100409			45929	40765.7
Q9UBQ5	Q9UBQ5	EIF3K_HUMAN	EIF3K	37356.9	36577.8	47331.8	45682.6	21983.7	18764.2	31764.5	27505.9	20648.6	16468.3
P53618	P53618	COPB_HUMAN	COPB1	37265.1	37096.5	59032	61186.8	39210.1	39924.4	33089.9	33968.8	49842.7	49113.3
O00232	O00232	PSD12_HUMAN	PSMD12	37252	40417	67599.4	71824.4	36963.4	38377.1	47440.8	42544.8	50445.1	54021.9
P22694	P17612;P22694	KAPCB_HUMAN	PRKACB	37241.7	38059.9	26539.1	25376.6	39338.1	39700.4	38105.9	34745	37136.2	43532.6
Q16629	Q16629	SRSF7_HUMAN	SRSF7	37239.1	45785.3	16467.9	17823.3	32478.6	33787	22967.1	23177
P00749	P00749	UROK_HUMAN	PLAU	37144.6	38928.3	4187.92	2998.28	11562.1	12559.1			48195.6	57199.7
P19623	P19623	SPEE_HUMAN	SRM	36929.7	33062.2	56087.1	61888.5	28377.4	30106.9	37905.3	47131.7	15124.4	6667.03
P08670	P08670	VIME_HUMAN	VIM	36860.3	34820.9	20286.8	20206.4	29600.4	26835.8	42633.4	40744	9319.72	14314.2
P35573	P35573	GDE_HUMAN	AGL	36820.6	36196.8	26584.1	27953	36954.2	38962.7	32685.5	33305.4	39421.3	37603.8
O15031	O15031	PLXB2_HUMAN	PLXNB2	36771.6	38390.8	29818	30637.8	27366.3	30421.8	60472.7	60609.9	26257.8	22057.2
E9PAV3	Q13765;E9PAV3	NACAM_HUMAN	NACA	36626.4	35349.5	24214.7	18086.6	16505.5	18923.4	15194.9	12533.9	8545.02	9155.77
Q96CE8	Q96CE8	T4S18_HUMAN	TM4SF18	36541.9	33895.1
Q9UNM6	Q9UNM6	PSD13_HUMAN	PSMD13	36521.6	33890.8	72802.6	74367.5	35239.7	34305.2	49598.5	50837.7	44091.4	48380.2
P63313	P63313	TYB10_HUMAN	TMSB10	36514	31317.4	39349.7	35737.4	14331.4	15400.5	38281.8	34418.9	31348.3	28338.5
P07910	P07910	HNRPC_HUMAN	HNRNPC	36485.9	32158.8	54906	48928.6	14827.5	16018.8	27409.3	25615.5	15283.7	15512.9
P07357	P07357	CO8A_HUMAN	C8A	36445.3	26091.6	9024.99	10007	32334.1	47651.1	32271.5	28920.3	22433.7	24902.3
P55884	P55884	EIF3B_HUMAN	EIF3B	36383.1	38184.3	57425.4	55019	24718.4	22174.1	36139.6	33939.4	20481.9	21590.3
Q9H299	Q9H299	SH3L3_HUMAN	SH3BGRL3	36142.3	31954.9	16874.5	18255.1	28038.4	19641.9	40976.1	36821.9	19094	21355.8
P26640	P26640	SYVC_HUMAN	VARS1	36134.9	33543.5	58284.6	61978.1	34510.2	35635.2	54662.9	52087.4	42035.1	40609.5
Q16181	Q16181	SEPT7_HUMAN	SEPTIN7	36052.4	38033.4	37496.4	36805.8	40109.2	37059.9	34047.1	28359	54247.2	51747.2
P09651	P09651;A0A2R8Y4L2	ROA1_HUMAN	HNRNPA1	35999.6	34214.6	92997.7	86470.5	22286.6	22123.4	45383.7	46720.7	33228	29745
Q9H2K8	Q9H2K8	TAOK3_HUMAN	TAOK3	35983.3	38345.7	28037.1	29017.6	23811.4	25883.5	47354	44500.7	29068.2	30355.9
P19012	P19012	K1C15_HUMAN	KRT15	35804.1	40094.5	54423.3	38449.8	39074.6	37332	73021.3	62405.5	109359	134774
P46379	P46379	BAG6_HUMAN	BAG6	35747.3	38871.7	59521.1	64738.6	37960.5	38495.7	43625.6	46930.3	35253.4	25962.5
Q9NTK5	Q9NTK5	OLA1_HUMAN	OLA1	35740.3	33964.1	42821.4	40668.2	30128.6	28238.4	27608.4	27944.6	35623.4	40022.6
P22105	P22105	TENX_HUMAN	TNXB	35661.1	36873.2	28476.2	29399.8	66152	69768.6	31033.2	33175.9	41235.6	37183.3
P68400	P68400;Q8NEV1	CSK21_HUMAN	CSNK2A1	35617.1	33929.6	61072.6	68437.9	31271.4	26574.3	25333.3	21796.5	21956.1	23535.3
O60488	O60488	ACSL4_HUMAN	ACSL4	35610.1	37226.9	28726.4	29535.7	35183.8	34223.9	49754.6	45693.1	37033.3	36940.4
O00391	O00391	QSOX1_HUMAN	QSOX1	35255.3	36579.5	24315.8	25223.4	39771.8	39460.9	22716.1	21697.7	19067.5	19495.5
Q16563	Q16563	SYPL1_HUMAN	SYPL1	35227.6	35785.9	65387.9	72463.1	11225	10204	45052.4	44216.8	23586.1	21244.2
Q86XP1	Q86XP1	DGKH_HUMAN	DGKH	35224.5	26973.1	19045.3	19715.4	18995.9	28620.7	22187.2	18496.9	35806.7	70989.9
P20742	P20742	PZP_HUMAN	PZP	35029.6	39672.6	14458.6	19540.3	33060.5	30010.8	21293.6	23133.9	62811.7	73241.6
P49281	P49281	NRAM2_HUMAN	SLC11A2	34965.8	36699.6	16088.9	14116.7	45304.8	53881.2	60962.1	73223.9	45992	28957.3
Q9BZE4	Q9BZE4	GTPB4_HUMAN	GTPBP4	34957	33518.4	30459	32475.7	25213.4	26211.1	35058.1	32262.7	49021.8	50240.9
Q96AZ6	Q96AZ6	ISG20_HUMAN	ISG20	34621.8	30670.9	7578.74	10188.1	44153.7	46166.9	27762.5	24987.9
Q92747	Q92747	ARC1A_HUMAN	ARPC1A	34515.9	31796.3	23162.8	25731.3	36923.4	42570.6	29186.6	28977	41622.8	40879
P31151	P31151;Q86SG5	S10A7_HUMAN	S100A7	34379.4	34410.8	52466.1	14089.5	13216.9	14856.8	31653.7	40939	3606.05	3956.42
P15924	P15924	DESP_HUMAN	DSP	34356.9	41995.2	130230	40881.7	41246.1	17044.5	125049	223346	29553	29820.6
Q99829	Q99829	CPNE1_HUMAN	CPNE1	34283.9	39600.9	65048.9	66546.9	17834.6	25600.9	49277.1	51367.6	33881	28374.3
Q99439	Q99439	CNN2_HUMAN	CNN2	34283.2	35057.9	26154.3	26168.2	41935.1	38699.9	33695.3	36571.3	28480	27428.4
Q15942	Q15942	ZYX_HUMAN	ZYX	34266.8	38052.1	21674.6	21766.5	40071.8	34064.1	35060.4	34849.5	32328.4	32380.8
Q9P253	Q9P253	VPS18_HUMAN	VPS18	34233.6	35079.3	25462.5	28427.5	33650.7	34390.9	25696	26839	36358	41440.8
Q9HC38	Q9HC38	GLOD4_HUMAN	GLOD4	34221	27158.9	18853.1	19867	21577.4	25622.7	25213.6	24290	5698.32	6436.36
P37235	P37235	HPCL1_HUMAN	HPCAL1	34210.5	37346.2	37938.8	47611.5	37348.1	30218.1	31070.2	33680.1	23075.3	28414.4
P37837	P37837	TALDO_HUMAN	TALDO1	34157.9	30747.4	30517.7	33045.9	31352.7	29331.4	26137.6	26818.9	14121.1	12899.5
P08575	P08575	PTPRC_HUMAN	PTPRC	34113	34341.9	20158.5	22499.1	13091.2	15205.3	52633.3	57788.9	31077.9	28125.4
O00154	O00154	BACH_HUMAN	ACOT7	34062.6	34084.5	47656.8	45990.2	33551	35987.2	40512.9	42820.3	36396.6	36497.6
Q96EA4	Q96EA4	SPDLY_HUMAN	SPDL1	34020.4	34122.3	16061.4	12490.7	43523.4	44906.3	21788.7	24000.7	39744.3	20486.2
Q7L9L4;Q9H8S9	Q7L9L4;Q9H8S9	MOB1A_HUMAN;MOB1B_HUMAN	MOB1A;MOB1B	33982.8	30220.7	28734.5	29795.8	38098.2	40823.7	34790.3	32211.4	22142.9	19884.7
P17812	P17812;Q9NRF8	PYRG1_HUMAN	CTPS1	33897.7	33332.3	27473.5	27556.1	29948.1	28073.4	35878.9	39497.5	22761.1	21320.7
P09455	P09455	RET1_HUMAN	RBP1	33895.5	32749.6	89969.3	82757	32466.6	34158.3	22422.5	21247.5	25044.5	17418.3
Q9H832	Q9H832	UBE2Z_HUMAN	UBE2Z	33877.9	36052.1	11957.9	13807.5	21875.3	21791.1	17891.6	16992.5	10899.3	13505.8
Q14847	Q14847	LASP1_HUMAN	LASP1	33823.3	37099.8	32690	34953.2	40041.5	38273.8	28122.5	30986.8	30666.7	31361.3
Q00013	Q00013	EM55_HUMAN	MPP1	33786.9	34849.9	20531.6	23502.7	38448	34338.4	31962.5	27566.5	34514.2	39683.6
Q13459	B2RTY4;Q13459	MYO9B_HUMAN	MYO9B	33775.4	34290.8	18260.3	18755.2	39010.6	38839.2	26004.9	30092.4	35307.8	35425.3
Q99999	Q99999	G3ST1_HUMAN	GAL3ST1	33712.1	32152.5	2819.38	3372.36	4496.02	6104.77	5201.22	3140.89
P25786	P25786	PSA1_HUMAN	PSMA1	33698.9	32909	13364.3	15586.4	37332.6	30435.6	39895.9	43039.2	25834.7	26498.6
Q13637	Q13637	RAB32_HUMAN	RAB32	33689.5	34253	20552.3	19934.8	21670.9	20923.4	55080.2	52143.9	10277.4	14991.5
Q02413	Q02413	DSG1_HUMAN	DSG1	33680.1	36614.7	31337.7	18618.4	24265.5	8152.46	85061.3	126441	2059.25	6260.85
Q9UQ13	Q9UQ13	SHOC2_HUMAN	SHOC2	33667.8	14737.2	5269.2	4968.4	16909.6	17255.2	11396.2	5599.54	17037.9	10870.9
Q15369	Q15369	ELOC_HUMAN	ELOC	33649.8	33008.2	36497.2	37704.4	20478.8	22119.6	34364.2	35652	16918.1	22770.9
Q96DG6	Q96DG6	CMBL_HUMAN	CMBL	33637.1	41453.8	17917.5	19508.3	26059.9	37823.5	23770.9	40067.9	51777.1	58426.7
P13612	P13612	ITA4_HUMAN	ITGA4	33633.5	33074.2	8844.84	15568.3	31827	21333.7	33366	25786.7	25071	24841.2
Q9Y2K9	Q9Y2K9	STB5L_HUMAN	STXBP5L	33505.5	35798.5	23930	23481.4	25761.4	27815.8	49055.3	45590.3
Q96PU5	Q96PU5	NED4L_HUMAN	NEDD4L	33495.3	34822.2	30142.8	31147.3	12280.7	13737.1	20676.8	19812	19534.1	22324.6
P47755	P47755	CAZA2_HUMAN	CAPZA2	33474.4	33691.5	21327.9	24147.7	33717.4	30269.2	18059.1	20524	27544.2	29148.9
Q16769	Q16769	QPCT_HUMAN	QPCT	33388.9	38987.6	13697.1	10269.9	20839.3	22068.5	6635.08	6919.68	5765.6	7027.85
Q13057	Q13057	COASY_HUMAN	COASY	33334	36856.4	27953.9	30106.5	34310.2	31260.5	29730.2	31725.8	18992.5	29781.2
P62857	P62857	RS28_HUMAN	RPS28	33323.7	31653.4	32982.3	32507.7	21479.3	16477.6	26609.2	32825.4	28623.4	20832
Q14703	Q14703	MBTP1_HUMAN	MBTPS1	33311.8	34222	16494.8	16167.8	28539.2	31020.6	35190.6	32026	39596.7	40806.3
P47813	P47813;O14602	IF1AX_HUMAN	EIF1AX	33285	29582.6	35559.5	36048.8	26334.7	24009.4	38862.9	43439.6	26861.5	33583
P05089	P05089	ARGI1_HUMAN	ARG1	33253.4	35578	26596.7	18539.9	28470	21193.9	78081.2	83862.8	17398.7	21348.2
Q9BY76	Q9BY76	ANGL4_HUMAN	ANGPTL4	33185.2	32750.8	8942.28	9477.28	3041.81	3415.49	4897.24	4725.79	47718.4	38389
P55786	P55786;A6NEC2	PSA_HUMAN	NPEPPS	33144.4	35392.3	20998.8	20594.7	24589	23761.3	28782.6	28780.9	16513.2	14433.9
Q6UXM1	Q6UXM1	LRIG3_HUMAN	LRIG3	33138	28410.3	37147	36880.3			6616.87	5732.6	11293.6	12218.7
P01040	P01040	CYTA_HUMAN	CSTA	33111.4	35064.2	29549.9	12213.5	25333.7	11297.6	45760.9	55965.3
Q7Z4W1	Q7Z4W1	DCXR_HUMAN	DCXR	32914.1	23398.9	34156.3	33487	20233.3	25937.2	31987.7	42632.8	94674.7	16897.1
P05107	P05107	ITB2_HUMAN	ITGB2	32838.7	30849.7	13815.9	14924.2	16575.7	16152.3	39501.3	38790.7	7666.36	7520.91
P21291	P21291	CSRP1_HUMAN	CSRP1	32757	31251.6	25142.6	29774.6	38061.5	37248.2	25428.6	29066.6	39429.7	40060.7
Q96C24	Q96C24	SYTL4_HUMAN	SYTL4	32745.9	33652.8	21173.4	20273.4	23616.7	24922	41153.3	38223.8	16366.9	16529.4
Q92973	Q92973	TNPO1_HUMAN	TNPO1	32702.3	28562.1	36824.5	39769.6	33004.5	32733.7	31943.6	33800.5	33807.4	33632
Q5TH69	Q5TH69	BIG3_HUMAN	ARFGEF3	32669	27171.2	25722.8	24982.5	15431.4	17036.8	35471.1	30244.9	56581.4	43435.8
P09211	P09211	GSTP1_HUMAN	GSTP1	32642.4	41338.7	53876.1	46519.7	37065.4	23727.4	20992.2	19166.7	45041.2	42273.6
Q7L576	Q7L576	CYFP1_HUMAN	CYFIP1	32584.8	33808.5	28615.7	30897	38506.8	39798.8	28300.6	30087.5	30830.9	32135.5
P21980	P21980	TGM2_HUMAN	TGM2	32573.1	33033	157441	166170	17993.3	17439.8	11816	12671.3	14696.7	17473.6
Q04941	Q04941	PLP2_HUMAN	PLP2	32552.7	26278.6	28234.7	39079.6	16169.2	14831	34998	43804	28094.1	32475.6
Q9Y6W3	Q9Y6W3	CAN7_HUMAN	CAPN7	32509.7	30227.6	49129.6	58241.2	17574.7	15700.9	29629.6	29143.2	18585	17449.3
O43790	O43790;A6NCN2	KRT86_HUMAN	KRT86	32500.3	33976.9					6585.39	4445.65	50435.6	39002.8
P54289	P54289	CA2D1_HUMAN	CACNA2D1	32483.2	30819	7970.32	8127.62	18057.1	17962.7	16071	16554.2	15110	14257.2
Q15435	Q15435	PP1R7_HUMAN	PPP1R7	32429.3	33897.2	16383.7	18849.4	21902	22651.8	13758.3	17362.3	23001.9	23447
Q13361	Q13361	MFAP5_HUMAN	MFAP5	32426.2	26138.3	13738.2	15503.5	63058	57256.1	13697.6	19180.5	42690	45277.9
P06730	P06730	IF4E_HUMAN	EIF4E	32375.5	30808.2	33674.2	36891.1	24992.7	27724.7	38171.4	31345.5	15045.5	16651.9
O60716	O60716	CTND1_HUMAN	CTNND1	32368.6	33679.8	36211.5	37192.1	18630.9	18588.2	20447.1	19363.8	29101.2	27891.8
P01112	P01112	RASH_HUMAN	HRAS	32333.8	31644	30865	29486.9	11305.9	10564.9	28807.8	28471.8	8956.84	11056.9
O75674	O75674	TM1L1_HUMAN	TOM1L1	32293.9	32288.7	13813.8	14189.3	10999.3	9798.36	17252.1	17770.3	13776.5	13451.9
O95297	O95297	MPZL1_HUMAN	MPZL1	32256	31673.2	15386.8	20113	9388.64	9836.38	69146.3	72856.1	25045.9	27500.1
Q99805	Q99805	TM9S2_HUMAN	TM9SF2	32231	28808.8	40882.2	47519.5	23481.7	22082.4	42022	38532.8	35848.9	31656.4
P00439	P00439;Q8IWU9	PH4H_HUMAN	PAH	32223.8	33611.6	13553.4	13029.5	39757.5	39328	21569.7	22058.7	41520.7	32330.5
Q9BSJ8	Q9BSJ8	ESYT1_HUMAN	ESYT1	32189.4	35055	21495.9	22041.9	38032.2	37288.7	28686.9	28695.4	23349.1	26221.8
O14495	O14495	PLPP3_HUMAN	PLPP3	32176.7	31443.3	11592.3	15271.4	15235.6	12401.8	19742.1	24466.9	14287.4	12116.9
P31948	P31948	STIP1_HUMAN	STIP1	32174.4	32154.8	33983.7	35949	27398.9	26238.6	36730	32852.2	32165	33863.5
P17936	P17936	IBP3_HUMAN	IGFBP3	32142.5	32068.9	47050.5	50252.3	53080	55449.5	11395.5	14108.4	30928.5	32649
Q6UX71	Q6UX71	PXDC2_HUMAN	PLXDC2	32127.1	33148.7	7879.23	8343.78	35494.3	30903.6	17857.7	18015.2	21724.6	10667.8
P61221	P61221	ABCE1_HUMAN	ABCE1	32046.7	32190	58263.4	59020.9	30583	29531.7	38647.9	41119.7	36636.2	42642
P48736	P48736	PK3CG_HUMAN	PIK3CG	31914.4	31616.1	19207.5	19704.2	31765.7	34119.8	27419.8	28950.2	39134.3	38980.2
Q08209	P16298;P48454;Q08209	PP2BA_HUMAN	PPP3CA	31895.2	32313.3	21498.3	24783.8	31674.7	28223.1	32536	34835.1	35663.1	31432.8
P83731	P83731	RL24_HUMAN	RPL24	31887.7	31509.2	29928.2	39348	25083.3	27607.2	36742.3	39522.5	17325.7	17330.9
P34932	P34932	HSP74_HUMAN	HSPA4	31856.5	31686.7	54578.3	50698.9	28409.1	28148.7	41773.2	43311.1	36149	32808.4
P49721	P49721	PSB2_HUMAN	PSMB2	31786.8	30402.7	18658.4	18152.3	27595.7	32073.9	50412.5	45500	22047.9	26622.3
P63241	P63241;Q9GZV4;Q6IS14	IF5A1_HUMAN	EIF5A	31766.4	28504.6	50164.3	47719.5	26757.3	30663.7	46878.4	56191.8	30902.4	30819.1
Q12884	Q12884	SEPR_HUMAN	FAP	31676.2	31255.2	14005.1	17132.7	31577.8	28459.1	17511.1	18207.1	25400.9	26145.2
Q16851	Q16851	UGPA_HUMAN	UGP2	31596.3	29692.8	28118.3	28555.3	26550.7	25466.9	28970.9	27558	31075.8	34747
P53999	P53999	TCP4_HUMAN	SUB1	31538.8	32146.7	8430.93	9489.99	81717.2	67174.4	22044.6	24134.5	10595.3	10334.5
P49588	P49588	SYAC_HUMAN	AARS1	31449.2	34507.3	41119	41456.6	31107	28665.7	56037.2	51871.2	29050.1	34938
Q9HC35	Q9HC35	EMAL4_HUMAN	EML4	31443.3	29924.8	39833.9	44064.5	28471.4	29724.7	25671.5	28356.4	22172.2	23892.7
P47989	P47989	XDH_HUMAN	XDH	31423.8	32390.3	8994.7	10744.6	8418.7	9915.15	73261.3	76912.2	8898.78	9894.32
P55001	P55001	MFAP2_HUMAN	MFAP2	31394.7	34182.4	50119.7	51934.3	42124.6	42676.4	30280.4	31163.3	30797.4	29592.7
Q9NZM1	Q9NZM1	MYOF_HUMAN	MYOF	31360.3	31040.7	12930.5	13146.4	6250.43	6049.68	139071	131701	22278.3	21031.3
Q92688	Q92688	AN32B_HUMAN	ANP32B	31346.3	28952.9	13493	13198.7	20203.9	17986.6	14809.6	11122	4761.36	7719.78
P30838	P30838	AL3A1_HUMAN	ALDH3A1	31310.9	34024.2
Q8TDB6	Q8TDB6	DTX3L_HUMAN	DTX3L	31266.8	25091.8	4605.89	3385.64	29774.3	36211.3			27436.4	21098.6
P13796	P13796	PLSL_HUMAN	LCP1	31258.6	27622.2	10255.8	11626.5	25048.2	24000.9	25655.6	24059.6	12855	13589.3
P48147	P48147	PPCE_HUMAN	PREP	31244.2	27770.3	23780.8	21902.5	28443.9	27549.8	25396.6	25523.3	28705.1	27623.1
P14923	P14923	PLAK_HUMAN	JUP	31216.2	32881.2	57198.1	29875.3	17499.2	7667.39	81819.4	121549	27525.6	26321
P35268	P35268	RL22_HUMAN	RPL22	31197.1	32807.4	44652.1	34983.7	18566.8	20741.1	37039.4	33069.3	8896.18	7218.07
Q16576	Q16576	RBBP7_HUMAN	RBBP7	31167.6	29089.7	73100.8	78698.1	24544	25290.3	62120.9	67150.3	37423.9	32530.9
Q58FF8	Q58FF8	H90B2_HUMAN	HSP90AB2P	31116.7	33944.4	17490.6	32242.9	28158.6	27322.2	34653.7	35145.6	33839.1	29858
Q9Y696	Q9Y696	CLIC4_HUMAN	CLIC4	31082.9	33353.6	23317.7	25235.8	30611.7	31354.5	31434.5	32779.1	29471.6	32727.6
P51674	P51674	GPM6A_HUMAN	GPM6A	31063.7	24966.2	17509.1	19162.7	30006.1	26475.8	36857.6	35360.2	25964	26756.8
Q8WVM8	Q8WVM8	SCFD1_HUMAN	SCFD1	31016.3	26157.1	18293.9	17602.2	34074.4	32862	21347.6	19928	24145.9	25293.7
Q9H1C7	Q9H1C7	CYTM1_HUMAN	CYSTM1	30977	22686.9	50863.6	47687.2	7078.28	10630	40590	34432.4	11529.2	8853.89
P05164	P05164	PERM_HUMAN	MPO	30972.6	30347.2	11233.4	13359.5	34932.7	34053.6	24693	27820.4	9615.97	11706.6
P07686	P07686	HEXB_HUMAN	HEXB	30909.5	31561.3	13539.4	6925.04	10186.2	10554.8	22400.4	23211	8928.62	13273.1
Q9NR12	Q9NR12	PDLI7_HUMAN	PDLIM7	30861.6	30830	17478.9	21344.6	33312.1	29785.2	20746.4	24103.5	35607	32649.5
P62191	P62191	PRS4_HUMAN	PSMC1	30834.9	31002.6	65904.8	64191.9	30109	27250.1	34321	32829.7	55609.9	52243.6
P01033	P01033	TIMP1_HUMAN	TIMP1	30736	28405	8936.05	6822.6	20136.3	21351.6	29232.2	31929.4	27643.1	30622
Q6ZMP0	Q6ZMP0	THSD4_HUMAN	THSD4	30729.6	28366	1704.29	1759.43	3189.46	1994.1	3666.56	4036.03	3067.8	2087.24
Q9H115	Q9H115	SNAB_HUMAN	NAPB	30626.3	34230.6	20801.1	23646.1	25131.4	27847.4	44173	36843.8	7736.94	8310.29
P55010	P55010	IF5_HUMAN	EIF5	30590.2	29003.9	20226.8	20815.8	17574.5	18286.5	17967.7	19569.5	13875.1	13256.1
Q8WV92	Q8WV92	MITD1_HUMAN	MITD1	30564.3	31136.7	64832.4	64659.2	4528.14	5056.73	23011.6	19414.6	8518.75	9945.72
Q9Y2A7	Q9Y2A7	NCKP1_HUMAN	NCKAP1	30544.4	33136.6	29514.9	33522	35012.5	34001.5	29387.7	27286.5	22281.4	22633.1
Q9C099	Q9C099	LRCC1_HUMAN	LRRCC1	30533.4	30608.4	8175.13	13525.1	77584.2	52884.3	10892.3	14259.3	7711.04	8512.72
O95336	O95336	6PGL_HUMAN	PGLS	30456.8	35077.1	15372.5	14223.5	29881.4	29269.8	34953.4	36983.7	21165.8	14975.3
P14174	P14174	MIF_HUMAN	MIF	30423.6	28033.2	35366.5	31727.4	12283.2	11936.9	140787	158147	17966.5	6929.59
O00338	O00338	ST1C2_HUMAN	SULT1C2	30358.8	32562.4	19945.2	23881.4	34630.1	25040	29304.6	26267.6	27263.3	32657.7
P16930	P16930	FAAA_HUMAN	FAH	30355	29600.3	8934.42	8756.52	32175.7	36652.6	17118.6	18845.1	10966.5	13878.3
Q96S99	Q96S99	PKHF1_HUMAN	PLEKHF1	30351	32413.7	6900.95	7055.28	14229.6	13817.6	14290.2	11820.9	12762.5	4892.19
Q14019	Q14019	COTL1_HUMAN	COTL1	30292	27535.1	23751.1	24466.4	23045.9	22453.9	35784.6	38921.4	20549.5	19219.8
P08263;P09210	P08263;P09210	GSTA1_HUMAN;GSTA2_HUMAN	GSTA1;GSTA2	30267.3	26509.5	18149.8	16174.2	31413.7	39114.5	19328.5	16069.7	28291.3	30561.4
O14556	O14556	G3PT_HUMAN	GAPDHS	30210.6	19730.2	18217.2	11694.8	36317	38746.5	34851.3	29180.5	62232.8	46964.7
Q08211	Q08211	DHX9_HUMAN	DHX9	30193.7	28306.4	118218	125680	15567.5	16630.8	44734.7	48579.9	36628.8	33210
P20339	P20339	RAB5A_HUMAN	RAB5A	30184.8	30254.9	19418.9	20049.2	22020.3	22255.3	34562.2	38301.7	18417.8	19068.3
P61024	P61024	CKS1_HUMAN	CKS1B	30167.4	33306.9	3656.74	2466.78			7655.91	6360.42
P08621	P08621	RU17_HUMAN	SNRNP70	30137.5	30605.7	47908.2	47943	17157.5	14647.3	34561.1	32570.6	28428.9	28139.1
Q99983	Q99983	OMD_HUMAN	OMD	30135.7	31340.5	7650.67	8153.72	21288.5	31117.7	27297	28230.5
P08243	P08243	ASNS_HUMAN	ASNS	30126.8	30189.3	67092.9	75035.5	29048.2	29333.3	44838.9	42996.9	40723	36132.2
Q9UL25	Q9UL25	RAB21_HUMAN	RAB21	30118.7	33361.5	26080.3	26650.4	26005.3	28822.5	44941.8	48176.3	20785.7	17070.3
P31431	P31431	SDC4_HUMAN	SDC4	30071.8	25700.7	44557	43838.8	17689.1	14810.2	23365.8	30019.4	43289.2	40677.7
O43657	O43657	TSN6_HUMAN	TSPAN6	30002.6	35984.8	11901.1	19495	12936.7	12613	19201.9	27587.7	23338	15532.8
Q9UIA9	Q9UIA9	XPO7_HUMAN	XPO7	29833.9	28761.5	39488	42458.8	31016.2	31910.3	26225.7	25643.5	29842.6	30219.6
Q9Y3I0	Q9Y3I0	RTCB_HUMAN	RTCB	29819.8	32289.2	51142.9	54029.6	28705.2	26032.4	29161.3	28743.3	44298.3	43755.3
P52565	P52565	GDIR1_HUMAN	ARHGDIA	29803.4	24059.2	24882.4	24405.3	20908	19182.3	48962.4	43360.8	17671.1	17938.8
P07858	P07858	CATB_HUMAN	CTSB	29794.7	26732	74972.6	13405.3	10788	9241.96	27212.7	22939.8	19316.4	16531.5
P61020	P61020	RAB5B_HUMAN	RAB5B	29793.8	27721.2	21948.4	21066.2	28722.5	28706.3	40681.7	39368.6	32243.1	33638.2
Q7Z460	Q7Z460	CLAP1_HUMAN	CLASP1	29769.5	29871.9	9010.01	10129	23207.3	23847.6	13857.3	15331.9	14024.6	12821.6
P22234	P22234	PUR6_HUMAN	PAICS	29756.1	31934.4	48659.8	51390.1	33375.3	29978.3	45304.4	50361.7	32741.4	29641.9
O15372	O15372	EIF3H_HUMAN	EIF3H	29755.2	30515.9	41297.5	41251.1	18273.3	17960.2	26373.6	28782	21752.1	18513.8
P08962	P08962	CD63_HUMAN	CD63	29751.6	30674.2	19629.5	25071.6	30751.4	27601.6	38022	58371.3
P61421	P61421	VA0D1_HUMAN	ATP6V0D1	29733	31353	17638.9	18211.9	24678.7	24929.3	92950.4	93593	13077.6	9095.01
Q15746	Q15746	MYLK_HUMAN	MYLK	29720.5	33635.5	25620.2	27547.9	33541.3	35015.1	31305.4	27440.6	21323.3	21957.8
P08134	P08134	RHOC_HUMAN	RHOC	29708.7	29349.6	13974.1	18392	23503.9	19332.1	32660.6	28105.5	1569.96	17173.3
P53985	P53985	MOT1_HUMAN	SLC16A1	29693.6	39421	108310	107018	24135.8	21878.6	234812	220397	38037.3	44832.4
Q6UY14	Q6UY14	ATL4_HUMAN	ADAMTSL4	29662.8	19367.3	14531.2	14493.4	42305.7	41827.3	23364	30644.1	29311.6	43599.3
Q9Y5P6	Q9Y5P6	GMPPB_HUMAN	GMPPB	29661.3	25782.4	21529.9	24278.2	24191.8	26166.5	26817.1	20965.2	34104.8	39822.5
P08174	P08174	DAF_HUMAN	CD55	29647.6	24213.9	5562.68	5801.91	5138.8	7373.68	171000	175092	9644	6849.63
P53634	P53634	CATC_HUMAN	CTSC	29292.6	26830.4	32874.8	13296.3	35571.4	31629.8	47703.6	39852.2	56614.9	68829.2
P62277	P62277	RS13_HUMAN	RPS13	29271.1	34512.1	45724.5	34013.3	17774.9	22930.8	39571.7	26978.1	34785.4	35708.8
O43759	O43759	SNG1_HUMAN	SYNGR1	29230	27401.6	16524.8	16879.7	20318.7	22878.7	25564.9	26300
Q08554	Q08554	DSC1_HUMAN	DSC1	29221.5	29886.8	23203.7	16141.8	18555.1	6684.53	64987.9	93682.9	2627.13	3119.74
Q13085	Q13085	ACACA_HUMAN	ACACA	29194.7	29258.6	36731.8	39217	26899	26262.7	27231.2	26577.3	28706.7	31196.4
O60884	O60884	DNJA2_HUMAN	DNAJA2	29170.6	32393.7	32873.3	34196.5	28643.3	24018.6	35458.9	31030.1	31741.2	31069
Q9Y5S2	Q9Y5S2	MRCKB_HUMAN	CDC42BPB	29153	27986.7	26176.8	24764.5	26056.9	24179.8	26903.7	25100.3	32448.3	33037.3
P34913	P34913	HYES_HUMAN	EPHX2	29134.8	37828.1	26037.9	31336.7	44816.3	55158.4	29213.2	36850.9	35539	40710.5
P35556	P35556	FBN2_HUMAN	FBN2	29133.9	28339.4	11087.6	11994	53867.9	56220.1	17391.7	18108.1	50789.1	51358
Q6PL24	Q6PL24	TMED8_HUMAN	TMED8	29030.4	26614.9	5847.64	6878.13	9722.29	11880.6	11849.3	11568.4
P06276	P06276	CHLE_HUMAN	BCHE	28963.4	30737	18493.5	18262.2	10746.3	7178.75	5033.12	7763.96
P25788	P25788	PSA3_HUMAN	PSMA3	28923.9	28814.8	19021	20713.5	31203.9	30496.7	44764.3	52875.6	15393.1	18424.9
P16035	P16035	TIMP2_HUMAN	TIMP2	28870.5	24134.3	7238.86	7098.81	17488.6	16378.3	15713.8	15408.2	12193.1	8314.91
P46019	P46019;P46020	KPB2_HUMAN	PHKA2	28833.8	30530.2	17232.5	19294.6	36525.1	35011.5	25908.8	25994.6	37989.8	35349.8
P22102	P22102	PUR2_HUMAN	GART	28794.4	29518.6	97078.4	97052.9	35870.8	35821.6	70627.2	68171.9	48448.1	47865.4
Q00266	Q00266	METK1_HUMAN	MAT1A	28676.7	27314.5	23408	22401.1	37551.2	35768.4	32420.1	29025.9	36217.3	47605.8
Q13404	Q13404	UB2V1_HUMAN	UBE2V1	28671.5	29559	21288.4	26836.1	24553.3	25549.4	38555.8	34601.5	21771.3	28334.6
O43491	O43491	E41L2_HUMAN	EPB41L2	28595.1	30582.9	30254.1	28667	30322.7	34906.1	43057.5	43122.7	19578.5	20207.9
Q03692	Q03692	COAA1_HUMAN	COL10A1	28566.3	26618.3	6660.45	7009.46	29786.7	30344.2	27366.3	28666.5	3823.59	3793.57
P61225	P61225	RAP2B_HUMAN	RAP2B	28559.5	29499.4	21516.7	22846.6	14195.5	13630	31129.6	34723.1	15061.4	17126.9
Q13155	Q13155	AIMP2_HUMAN	AIMP2	28552.6	31546.5	123019	126287	19573.5	19793.2	46807	51689	33989.6	31036.9
Q15149	Q15149	PLEC_HUMAN	PLEC	28538.6	27665.1	40400.7	36651.1	16114.6	16720.2	24541.4	24162.6	46766.4	47057.9
P49207	P49207	RL34_HUMAN	RPL34	28533.2	29768.7	19291.3	14634.9	25068.9	26810.8	37810.4	27313	7381.4	3098.94
P20618	P20618	PSB1_HUMAN	PSMB1	28438.2	29632.3	18912.8	19596.4	35004.3	27274	50144.4	52079.5	24235.8	26372.3
O43852	O43852	CALU_HUMAN	CALU	28425.2	26167.5	12937.8	12091	24035.1	19668.8	19785.2	11780.1	32256.6	25672.5
Q9NUM4	Q9NUM4	T106B_HUMAN	TMEM106B	28303.7	28620.8	9226.77	11633.6	6737.21	9272.42	132060	138827	4882.33	4703.68
Q92608	Q92608	DOCK2_HUMAN	DOCK2	28267.6	27387	15091.7	16896.3	31106.4	31353.6	19998	20410.4	21922.5	26538.9
Q15517	Q15517	CDSN_HUMAN	CDSN	28194.6	28683	16541	12022.4	26508.9	8221.7	89980.8	144737
P33527	P33527	MRP1_HUMAN	ABCC1	28065.4	29394.4	9459.04	9711.04	5362.38	6229.6	12771.5	10408.1	5867.88	6211.19
O00743	O00743	PPP6_HUMAN	PPP6C	28014.2	30186.3	23599.6	27311.2	34520.9	30693.3	23029	26649.6	22091.6	18929.3
P33176	O60282;P33176	KINH_HUMAN	KIF5B	27948.7	28970.7	42211.8	43771.9	36400.1	32394.8	32848.3	31391.2	37761.7	37425.4
P56537	P56537	IF6_HUMAN	EIF6	27927.4	23921.2	38701.4	40357.6	16814.6	15959.3	23227.4	22896	23430	19803.9
Q9BXJ9	Q9BXJ9	NAA15_HUMAN	NAA15	27888.3	28068.8	59828.1	61108.6	31056.3	29430.1	37139.7	35338.1	36601.4	39583.2
Q70J99	Q70J99	UN13D_HUMAN	UNC13D	27873	30941.6	18375	17941	25852.9	23511.3	36749.4	35764.5	26794	25614.9
Q9NZB2	Q9NZB2	F120A_HUMAN	FAM120A	27808	27401.5	15107.2	17168.9	17766.8	18672.7	16276.2	14362.4	22630.4	23749.3
O75935	O75935	DCTN3_HUMAN	DCTN3	27806.2	28363.6	20383.7	19498	30803.2	28365.3	21107.2	25199.7	13451.9	14967.7
O95396	O95396	MOCS3_HUMAN	MOCS3	27774.8	27976	22937.8	26107.2	36205.7	22016.4	25510.7	22344.3	25902	24181.6
P63151	P63151	2ABA_HUMAN	PPP2R2A	27758.2	28193.8	29526.1	30644.3	22560.7	19849.4	27901.8	29350.2	38817.9	36384.3
P09543	P09543	CN37_HUMAN	CNP	27735.5	28493.7	26109.5	27095.7	16100	14343.5	40487.1	36422.6	21891.9	21411.5
Q9UNS2	Q9UNS2	CSN3_HUMAN	COPS3	27729	28960.5	24233.1	28136.4	27293.2	26136.6	24317.8	26492.8	33859.1	33326.9
Q693B1	Q693B1	KCD11_HUMAN	KCTD11	27684.2	27666.5	36547.2	42463.1	32345.6	25994.8	37330.5	27822	6345.52	6715.09
Q99460	Q99460	PSMD1_HUMAN	PSMD1	27681.5	28285	72550.3	76356.9	24722.2	23287.5	37535.4	40031.4	40052.8	42653.8
Q14332	O75084;Q14332	FZD2_HUMAN	FZD2	27652.2	26470.4	2442.76	4462.95	10584.4	8599.65	6986.74	6591.76
Q9BV40	Q9BV40	VAMP8_HUMAN	VAMP8	27634.6	23275.3	27292.5	28464.8	18163.4	17592.3	89266.7	84412.6	32227.6	34823.6
P05062	P05062	ALDOB_HUMAN	ALDOB	27595.1	27316.9	16315.7	15131.2	33154.9	31898	16643.6	16934.8	19589	18437.4
Q9HAV0	Q9HAV0	GBB4_HUMAN	GNB4	27594.6	27956.4	16923.3	18711.9	31697.4	29303.2	113433	100558	19251.9	20887.8
P15586	P15586	GNS_HUMAN	GNS	27521.2	24158.4	9717.03	6495.64	7156.69	7689.09	25680.4	28530.3	6751.03	7722.12
P61201	P61201	CSN2_HUMAN	COPS2	27497.7	28078.2	24578.7	26775.6	26252.1	27954.9	21606.8	20694.6	25575.6	28865
P30613	P30613	KPYR_HUMAN	PKLR	27487.1	27308.7	17352.6	19020.1	25514.5	22920.5	23333.9	21324.2	31835.9	27726
O43813	O43813	LANC1_HUMAN	LANCL1	27437.2	29811.8	24957	27068.9	24888.6	21920.7	61215.2	70803.1	29309.8	17013.7
Q12913	Q12913	PTPRJ_HUMAN	PTPRJ	27413.2	27284.5	15437.5	16679.5	4820.69	5203.17	19431.8	18331.2	8007.12	2937.5
P46778	P46778	RL21_HUMAN	RPL21	27389.2	28663.9	32332	30928.1	19620.5	21161.7	34756.1	30768.5	31485.1	24742.2
P15291	P15291	B4GT1_HUMAN	B4GALT1	27387.8	26905.3	5301.12	8128.6	28679.8	30006.3	23703	35924.1	18894.1	23557.4
P00492	P00492	HPRT_HUMAN	HPRT1	27362.1	28272.9	29807.8	28151.8	23061.4	23421.8	30826.4	30001	20243.9	14802.2
Q9UDY4	Q9UDY4	DNJB4_HUMAN	DNAJB4	27336.7	26145.8	13206.8	14258.6	24426.5	27582.9	53609.4	48882.9	23786.9	23276.6
P01116	P01116	RASK_HUMAN	KRAS	27328.3	28763.2	50485.8	49342.6	20951.3	20495.4	37867.4	35608.3	19316.7	17306.5
P01834	P01834;P0DOX7	IGKC_HUMAN	IGKC	27254.1	26455.9	16970.3	8308.44	12706.7	9808.13	28952.7	43708.7	3191.06	1600.96
Q7Z3U7	Q7Z3U7	MON2_HUMAN	MON2	27200.9	28471.4	17680.7	19160.8	27646.4	28636.4	25217.3	27960.1	24819.4	25355
Q13822	Q13822	ENPP2_HUMAN	ENPP2	27150.5	27125.1	8000.27	10639.6	26571.7	27209.6	8731.4	11810.6	16555.3	17333.2
P52272	P52272	HNRPM_HUMAN	HNRNPM	27107.5	26613.5	47945.8	48829.4	21996.1	21448.6	33088.5	31130.9	42246.9	37483.2
Q7Z794	Q7Z794	K2C1B_HUMAN	KRT77	27051.8	34744.3	98809.8	14441.9	21693.1	38777.9	50743.2	38739.8
Q9H444	Q9H444	CHM4B_HUMAN	CHMP4B	27051.5	25336.3	35600.1	35055	15865.2	17416.9	27938.4	24691	16907.9	14289.7
P02730	P02730	B3AT_HUMAN	SLC4A1	27001.8	20710.2	8778.2	7384.89	22712.8	20035	29964	47194.2
Q99700	Q99700	ATX2_HUMAN	ATXN2	26987.8	28703.3	25796.3	23006.8	30840.1	27815.9	20432.4	18414	22028.7	13115.8
Q9Y6M5	Q9Y6M5	ZNT1_HUMAN	SLC30A1	26961.2	24910.6	20813.7	19509.2	19504.3	16634.9	86667.4	87320	16886.9	13019.6
O60462	O60462	NRP2_HUMAN	NRP2	26950.5	27606.7	7465.47	8620.27	16941.5	16989.9	10890.9	8736.17	13166.7	16675.3
P46926	P46926;Q8TDQ7	GNPI1_HUMAN	GNPDA1	26839	33071.9	23868.6	26686.9	32040.1	29569.9	28640.1	36649.6	31531.9	35333.6
P07711	P07711	CATL1_HUMAN	CTSL	26815.3	26845	6277.79	2767.41	4522.44	2492.22	7388.99	6695.53	3678.79	3850.34
A6NMZ7	A6NMZ7	CO6A6_HUMAN	COL6A6	26797	26758	9844.97	11213.7	36497.4	44110	28690.2	31220.6	19288.5	18323.5
Q8IX04	Q8IX04	UEVLD_HUMAN	UEVLD	26794.7	29041.9	28634.3	28057.9	4586.32	5367.91	12274.5	10935.7	8195.15	6914.08
O60749	O60749;Q13596	SNX2_HUMAN	SNX2	26779.6	26061.1	21340.6	21446.1	27643.9	25204.7	22102.6	24019.4	26418.9	23476.3
P42025	P42025	ACTY_HUMAN	ACTR1B	26773.9	23921.3	27486.3	27400.7	23169.4	25093.4	24731.9	26496.6	39869.4	38636.9
Q9NUP9	Q9NUP9	LIN7C_HUMAN	LIN7C	26761.5	31681	37540.8	43585.2	17276.1	16931.6	42485.7	39990.8	14856.7	10744
Q99497	Q99497	PARK7_HUMAN	PARK7	26688.6	28507.4	22628.1	19966.4	24961.5	28387.2	46063.2	44054.3	21899.9	16389.1
Q9UBR2	Q9UBR2	CATZ_HUMAN	CTSZ	26681.4	19077.5	45496.7	31696.9	34684.3	18212.1	89898.4	79622.9	27726	30646.3
Q9UQ16	Q9UQ16	DYN3_HUMAN	DNM3	26617.2	27244.4	20037.2	22052.7	25686.2	24877.4	25038.1	24209.9	31114.2	27947.4
Q9Y315	Q9Y315	DEOC_HUMAN	DERA	26615.9	29069	19415.9	18060	23359	23504.8	19748.4	20744.6	21346.2	19697.7
Q9HBH0	Q9HBH0	RHOF_HUMAN	RHOF	26597.3	28379	21097.5	23708.8	4759.58	6140.84	32401.7	35541.6	18026.2	16218.3
P60520	P60520	GBRL2_HUMAN	GABARAPL2	26595.4	32435.7	19739.9	24769	25557.4	31864.8	160222	153593	21169.3	27276.3
O75531	O75531	BAF_HUMAN	BANF1	26580.6	23335.3	114313	83604	27499.2	15531.9	19937.6	23670.9	135913	151984
P01889	P01889	HLAB_HUMAN	HLA-B	26563.8	24077.4	17998.3	20919.5	41557.9	41035.3	62907.8	59588	15364.8	18744.3
Q13530	Q13530	SERC3_HUMAN	SERINC3	26559.7	23353.6	22786.6	23487.7	14167.4	17580.6	72949.8	68400.3	9020.29	8774.77
P26639	A2RTX5;P26639	SYTC_HUMAN	TARS1	26479	24491.2	33107.1	35533	28898.2	28447.1	45218.9	49631.3	28326.4	33846.2
Q9Y6W5	Q9Y6W5	WASF2_HUMAN	WASF2	26469.8	23000.6	14861.1	15784.6	28445.4	27849.8	18665.6	18184.2	16469.1	14256.4
Q08945	Q08945	SSRP1_HUMAN	SSRP1	26452.7	22835.7	86445.7	90819.9	18718.9	18042.9	20260.3	18688.4	18068.8	17846.2
P78527	P78527	PRKDC_HUMAN	PRKDC	26449.2	27323.6	80534.9	86885.2	9412.78	8910.2	20759.4	20857.3	41985.4	42568.7
Q93063	Q93063	EXT2_HUMAN	EXT2	26424	28777.8	14574	15319.5	24199.9	25229.9	17208.7	16515.9	24176.1	25859
P31025	P31025	LCN1_HUMAN	LCN1	26419.8	24217.9	8283.47	5881.01	14239.9	6663.96	44377.1	52189.4
Q5T2L2	Q5T2L2	AKCL1_HUMAN	AKR1C8	26390	16759.6	6876	7075.81	21023.6	19693.1
Q8IZP0	Q8IZP0;Q9NYB9	ABI1_HUMAN	ABI1	26368.5	27847.1	23057.8	23781	31367.3	26584.7	22636.6	23814.7	26614.3	27029.8
O43324	O43324	MCA3_HUMAN	EEF1E1	26358.6	20612.2	45226.3	48054.4	17539.8	19493.5	22455.3	24287	11623.2	13647.3
P63096	P63096	GNAI1_HUMAN	GNAI1	26354.7	23881.5	29839.1	39138.3	11989.7	9744.28	28561	36328.9	6531.71	5577.52
P14735	P14735	IDE_HUMAN	IDE	26322.1	26672.3	40056.3	31270.8	25053.9	21746	36794.6	35188.5	24400.5	19899.4
P53680	P53680	AP2S1_HUMAN	AP2S1	26224.1	28128.6	23842.8	22625.3	19057.7	17655.2	27561.5	26063.9	12284.9	12671.2
Q96F85	Q96F85	CNRP1_HUMAN	CNRIP1	26219	20793.8	9847.71	12562.7	22435.8	23755.8	21573.3	21341.8
A5D8V6	A5D8V6	VP37C_HUMAN	VPS37C	26211	26252.2	29663.6	23794.7	6225.03	6810.54	20961.3	17056.5	12272	11586.4
Q99873	Q99873	ANM1_HUMAN	PRMT1	26203.3	25344.1	96682.9	103860	17999.6	18249.3	30428.9	29557	34975.4	35427.3
Q9BXS5	Q9BXS5	AP1M1_HUMAN	AP1M1	26178.5	26770.9	20942.1	22867	31769.4	30453.4	29516.5	32015.3	19878.3	21096
Q14195	Q14195	DPYL3_HUMAN	DPYSL3	26132.4	26921.7	22868.4	24286	26404	28229.7	22536.8	20223.1	22491.8	18301.6
Q9BRG1	Q9BRG1	VPS25_HUMAN	VPS25	26109.4	28171.1	14215.4	14799.1	28860.9	23352	23243.1	27366.9	22701.2	17284.3
P61952	P61952	GBG11_HUMAN	GNG11	25991.3	28517.8	24394.4	19567.4	9561.32	10070.3	51057.8	41222.1	15825.3	11859
Q9UBX5	Q9UBX5	FBLN5_HUMAN	FBLN5	25969	23851.9	11750.4	14556.1	30913.9	34110.4	17532.9	20277.8	26108.4	21200.4
P49755	P49755	TMEDA_HUMAN	TMED10	25962.5	24191.5	24077.4	19560.9	10913.2	14909.7	21414	23076.8	70711	63095.2
Q9UBX1	Q9UBX1	CATF_HUMAN	CTSF	25955.2	21489	9207.22	7803.97	14665.5	18026	26595.5	24579.4	13194	9237.48
Q86WI1	Q86WI1	PKHL1_HUMAN	PKHD1L1	25953	25272.8	11181	12202.6	21970.4	23337.9	20108.3	18728.4	28522.5	33102.1
P36543	P36543	VATE1_HUMAN	ATP6V1E1	25915.5	21842.6	13634.5	14808.5	33780.1	21098.1	18013	13478.5	17415.1	19317.4
Q15046	Q15046	SYK_HUMAN	KARS1	25911.8	22673.1	32399.3	35055.2	28988.1	29521.9	21909.8	24287.9	23008.8	30098.4
P28074	P28074	PSB5_HUMAN	PSMB5	25887.2	26917	23545.9	23711.7	28843	29921.1	54356.7	53623.8	16938.9	17134.2
Q9BZP6	Q9BZP6	CHIA_HUMAN	CHIA	25829.2	27832.3			39603.2	46553.1	25489.4	28832.7	26520.3	22909.1
Q96CM8	Q96CM8	ACSF2_HUMAN	ACSF2	25825.4	26429.9	4741.33	4763.47	41454.6	41704.1	15146.9	16841.3
Q9HD89	Q9HD89	RETN_HUMAN	RETN	25816.3	27305.4	8037.03	8149.24	81612	89250.6	33843.3	36628.5	29362.1	25348.4
P07237	P07237	PDIA1_HUMAN	P4HB	25789.5	24028.8	22306.2	14657.5	30349.9	30372.3	21415.9	22013.2	39040.9	39577.6
Q9H4A4	Q9H4A4	AMPB_HUMAN	RNPEP	25781.9	23226.6	17108.8	18181.7	26965.3	28503.9	24831	26859.7	21011.8	18284.1
Q13162	Q13162	PRDX4_HUMAN	PRDX4	25684.3	24974.8	20006.9	19624.7	30089.9	28748.8	37021.3	37497.5	20402	26209
P62760	P62760	VISL1_HUMAN	VSNL1	25648.2	9450.91	13688.7	13757.5
P14209	P14209	CD99_HUMAN	CD99	25542.8	22752.3	12542.2	16190	4764.02	4618.51	36098.4	30649	6476.73	13818.4
P30876	P30876	RPB2_HUMAN	POLR2B	25527.6	23906.7	43790.2	47254.6	17625.6	19544	19801.4	22398.7	28496.4	27525.4
P06744	P06744	G6PI_HUMAN	GPI	25515.7	24286.9	45585.1	43825.1	8857.01	9002.64	45717.5	44146.3	5463.56	5700.48
Q9UPN3	Q9UPN3	MACF1_HUMAN	MACF1	25493.8	26425.7	30537.6	28221.1	26007.7	25841.3	23766.8	24214.1	24361.1	23816
Q9Y5X1	Q9Y5X1	SNX9_HUMAN	SNX9	25463.6	32073	27492.4	26655.1	20781.7	18042.9	17230.3	17548.5	36252.4	41427.1
P59768	P59768	GBG2_HUMAN	GNG2	25457.5	26907.6	11826.3	13401.2	16928.4	17354	22973.8	24799	9268.39	12777.5
P24821	P24821	TENA_HUMAN	TNC	25441.4	24629.7	26292.7	24418.5	168146	167084	21317.6	23743.9	24650.3	26645.2
P22528;P35321	P22528;P35321	SPR1A_HUMAN;SPR1B_HUMAN	SPRR1A;SPRR1B	25429.6	23819.3	143863	10897.9	14968.7	10038.8	83802.2	171070	5086.81	5849.76
P84095	P84095	RHOG_HUMAN	RHOG	25410.5	26710.1	15676.8	16806.5	17379.9	16575.7	32686.9	29640.9	29990.8	30985.3
Q7L014	Q7L014	DDX46_HUMAN	DDX46	25373.8	23289.5	27317.1	26333.9	13435.1	15515.7	20956.9	24615.8	7557.24	13803.3
P61966	P61966	AP1S1_HUMAN	AP1S1	25319.4	19794.2	19345.8	18102.7	21146	18781.8	27947.7	31676.9	28776.4	27477.4
O95858	O95858	TSN15_HUMAN	TSPAN15	25292.5	23124.5	6899.68	8178.83	3771.51	3285.4	1935.11	7667.65
Q5T2W1	Q5T2W1	NHRF3_HUMAN	PDZK1	25274.2	30344.7	5997.04	4469.1	11945.3	10567.4	11411.5	10142.5	8949.46	8656.71
Q9NVJ2	Q96BM9;Q9NVJ2	ARL8B_HUMAN	ARL8B	25266	24065.3	19788.8	18214.4	17247.9	18617	80496	98354.5	21873.4	25702.9
Q96DR8	Q96DR8	MUCL1_HUMAN	MUCL1	25199.3	45860	8418.04	8694.83	12322.5	8914.97	74027.9	56409.3	47198.5	38255.1
Q4VX76	Q4VX76	SYTL3_HUMAN	SYTL3	25050.4	19962.9	8889.97	12591.9	15080.4	15289	18560.7	26509.8	8986.98	10338.4
P08729	P08729	K2C7_HUMAN	KRT7	24861.6	24856.3					6132.08	6468.21	67553	70347.3
O43747	O43747	AP1G1_HUMAN	AP1G1	24851.8	23894.6	18760.8	20203.5	26423.3	26761.8	26708	27394.2	27258.7	23197.8
Q99808	Q99808	S29A1_HUMAN	SLC29A1	24850.5	22603.3	19846.2	20701.9	12059.6	12048.8	45477.8	46740.2	11240	13407
Q3LXA3	Q3LXA3	TKFC_HUMAN	TKFC	24826.1	26938	12434.4	12011.7	25920.8	27085	20800	19117	13811	16091.2
P20849	P20849	CO9A1_HUMAN	COL9A1	24756.7	19241	7938.7	10316.7	34695.2	33691.1	17049.4	16289.4	19892	17216.6
Q7Z6Z7	Q7Z6Z7	HUWE1_HUMAN	HUWE1	24735.1	25235.4	25467	27194.7	24629.6	25061.1	18564.8	17507.5	17802.3	18970.6
Q14240	Q14240	IF4A2_HUMAN	EIF4A2	24651.3	21429.5	21680.5	20042.9	29865.2	21199.9	21142.9	19629.5	34355.4	36446.3
O14617	O14617	AP3D1_HUMAN	AP3D1	24606.3	25312.4	18712.9	19189.7	25237	24698.9	20181	21531.5	24323.4	23016.4
P32754	P32754	HPPD_HUMAN	HPD	24589.3	22759.1	8314	9181.37	27752.4	19758.2	33088	32187.6	26288.9	24672.2
P62314	P62314	SMD1_HUMAN	SNRPD1	24556.3	22785.6	71287.2	75915.8	15010.6	19489.9	27236.1	27075	25092	26913.2
P04062	P04062	GLCM_HUMAN	GBA	24553.7	23239.8	14158	10825.1	16733.2	16808.1	35814.9	39273.6	10302.3	11168
P31327	P31327	CPSM_HUMAN	CPS1	24535.1	23573.2	14841.9	14726.8	20884.2	23181.2	39514.7	38654.7	20782.5	17972.5
Q9H4L4	Q9H4L4	SENP3_HUMAN	SENP3	24510.6	21896.1	22137.4	19181.7			27774.8	13270.2
P55060	P55060	XPO2_HUMAN	CSE1L	24496.8	23958.5	46103	52760.1	27382.5	27239.9	33321.8	33646	33944.9	33782.5
O94907	O94907	DKK1_HUMAN	DKK1	24458.3	27747	4380.05	4187.89	63521.3	69830.8	4095.01	1748.52	24981.9	21840.4
Q92616	Q92616	GCN1_HUMAN	GCN1	24437.3	24682.9	49658	52922.4	20157.2	21698.3	29272.3	28165.6	31926.2	32057.3
Q9UQ80	Q9UQ80	PA2G4_HUMAN	PA2G4	24431.1	24043.7	38380.4	37913.2	24746.6	23774.8	33675.4	31578.5	34543.2	34080.1
P36404	P36404	ARL2_HUMAN	ARL2	24430.8	24690.5	17287.1	20072.9	29819	26766.9	20491.7	22519.4	22127.3	16067.8
P46782	P46782	RS5_HUMAN	RPS5	24421	22620.9	45908.1	49584.2	16658.5	15667.2	31310.7	28811.3	33141.2	29101.9
P53814	P53814	SMTN_HUMAN	SMTN	24372.7	26179.8	7766.45	8498.4	27543.2	25264.4	23400.2	28465.8	8885.66	10835.4
Q14289	Q14289	FAK2_HUMAN	PTK2B	24344.3	24395.7	12927.2	15507.8	25670.3	26693.3	21170.6	21273.1	21820.6	24629.5
Q9Y5X3	Q9Y5X3	SNX5_HUMAN	SNX5	24324.3	25690.9	15863.8	17136	22937	24322.6	19021	18268.6	22608.3	23358
P12277	P12277	KCRB_HUMAN	CKB	24307.1	23765.7	23514.2	21915.7	28574.4	30268.6	75461.4	69890.2	17701.6	18053.3
P42830	P42830	CXCL5_HUMAN	CXCL5	24274.1	25231.4	1603.64	1230.86	2418.32	3919.47
P24534	P24534	EF1B_HUMAN	EEF1B2	24239.4	23127.4	51681.6	41845.7	26497.3	28179.1	41313	43231.6	18397.8	26642.4
P15104	P15104	GLNA_HUMAN	GLUL	24179.9	27816.4	19481	18660.6	20771.8	23261.4	24692.1	24784.8	32680.7	29240.1
P63027	P23763;P63027;Q15836	VAMP2_HUMAN	VAMP2	24155.5	25179.9	25290.9	23323.9	22612.4	22306	32281.1	32089.1	15408.8	17522.4
Q9P2R3	Q9P2R3	ANFY1_HUMAN	ANKFY1	24152.9	25906.9	20964.5	21430.8	26586	24981.9	25838.1	24917.9	19310.2	17765.4
P10451	P10451	OSTP_HUMAN	SPP1	24144.2	24876.3	3410.47	3666.36	30974.6	31803.3	15955.1	14158.8	10387.3	8104.15
P24043	P24043	LAMA2_HUMAN	LAMA2	24126	24017.2	17374.7	21087.5	43665.2	41762	14879.4	15473	21644.5	23641.4
O15400	O15400	STX7_HUMAN	STX7	24124.8	27145.5	28036.5	31413.6	21744.9	23733.3	36835.7	46405.6	22494.5	19832.5
Q9NZZ3	Q9NZZ3	CHMP5_HUMAN	CHMP5	24076.9	24333.5	47006.4	43654.8	10172.6	7510.68	24520.6	20647.6	13200.1	11450.8
P20930	P20930	FILA_HUMAN	FLG	24038	28534.6	36683	16712.8	11234.1	7920.62	66215.4	79441.1	3449.05	3427.8
O75191	O75191	XYLB_HUMAN	XYLB	24034.4	26725.9	16238.4	17085.2	22894.6	21843.2	18190.1	18475	10719.7	9776.3
P25398	P25398	RS12_HUMAN	RPS12	23919.9	22376.5	26418.4	29905.2	16862.6	15801.7	24734.6	24526.1	18294.5	21825.6
Q99985	Q99985	SEM3C_HUMAN	SEMA3C	23896.7	23795.3	2729.45	2477.57	45829.7	44447.7	13750.6	11887	5547.67	6511.48
P54136	P54136	SYRC_HUMAN	RARS1	23794.3	24457	95701.3	101099	19072	20812.1	38662.8	36808.6	29027	28816.2
Q8TDZ2	Q8TDZ2	MICA1_HUMAN	MICAL1	23790.4	23772.8	12974.9	14782.4	22437.1	21124.9	21316.6	23712.9	18355.5	21082.5
Q14203	Q14203	DCTN1_HUMAN	DCTN1	23777.3	22238	27239.3	29023.6	25636.7	24100.7	16002.6	16245.7	16982.8	18889.7
O00160	O00160	MYO1F_HUMAN	MYO1F	23732.3	22518.6	9233.43	9881.43	25709	28342.1	19488	20601.9	18883	19660.2
P36405	P36405	ARL3_HUMAN	ARL3	23731.6	26803	17546	19527.9	25074.7	23500.3	23541.5	22969.7	26235.1	29835.7
Q7L5Y1	Q7L5Y1	ENOF1_HUMAN	ENOSF1	23722.3	21666.9	10889.7	13167.5	24607.3	22677	23415	25089.1	14755.1	20806.2
Q14914	Q14914	PTGR1_HUMAN	PTGR1	23704.1	20019.6	11028.8	7115.82	8941.35	7250.14	16027.4	15709.8	10039	23479.1
P27361	P27361	MK03_HUMAN	MAPK3	23694.8	22339.5	12372.4	14572.4	27338	24667.5	21810.1	20822.4	30770.2	27288
P40616	P40616	ARL1_HUMAN	ARL1	23686.8	22769.1	21305	23503.4	19006.4	17642.4	24300.8	21618.7	30916.3	28870.1
Q9HCE1	Q9HCE1	MOV10_HUMAN	MOV10	23667.2	23006.6	9238.99	8445.34	20531.1	18998.8	12788.6	13800.7	30927	31176.5
P15144	P15144	AMPN_HUMAN	ANPEP	23659.6	21615.3			6826.95	5300.59	10836.3	6318.94	177990	199803
Q8N8N7	Q8N8N7	PTGR2_HUMAN	PTGR2	23626.8	21761.4	8050.67	12531.6	18328.7	16588.7	13115.9	13065.9	4711.74	6238.96
O43760	O43760	SNG2_HUMAN	SYNGR2	23622.9	28351.1	21559.2	33940.9	7966.08	17190.5	35755.7	44012.9	18190.5	24122.8
Q5SSJ5	Q5SSJ5	HP1B3_HUMAN	HP1BP3	23622.8	22816.8	13839.7	15377.4	23472.7	23771	10480.3	10565.9	16246.9	15032.7
O75054	O75054	IGSF3_HUMAN	IGSF3	23597.7	23781.6	8438.92	8593.22	3499.12	4523.41	22799.6	21906.1	17622.6	15875
O00410	O00410	IPO5_HUMAN	IPO5	23565.4	24402.4	29548.6	31314.8	26965.2	24960	32868.5	34096.8	27161.9	30186.9
P22626	P22626	ROA2_HUMAN	HNRNPA2B1	23554.3	23979.2	71920.4	73416.9	15240.8	13782.5	22966.8	23765.5	13077.9	13953.4
P42898	P42898	MTHR_HUMAN	MTHFR	23504.8	21850.6	12251.5	13382.9	28273.9	24281.3	12758.5	14986.3	16964	19905.7
O95395	O95395	GCNT3_HUMAN	GCNT3	23461.1	24433.5
O15305	O15305	PMM2_HUMAN	PMM2	23434.1	22679.1	9764.34	12305	19759.1	18282.3	19955.6	17539.9	19926.2	19013
Q9BRF8	Q9BRF8	CPPED_HUMAN	CPPED1	23407.2	29247.6	13209.9	18737.4	32736.8	25712	17873.5	19835.6	17580	16879.2
P42766	P42766	RL35_HUMAN	RPL35	23384.1	23112.7	14160.8	14225.5	20548.2	18471.3	27672.9	26915.2	14081.6	11525.7
Q9NPH3	Q9NPH3	IL1AP_HUMAN	IL1RAP	23322	25584.8	6192.16	5111.01	24743.2	25754.3	21568.2	19916.9	24092.2	24726.5
Q15643	Q15643	TRIPB_HUMAN	TRIP11	23317.9	22807.7	19888.2	17460			20308.6	21327.9	31601.4	28839.5
P40763	P40763	STAT3_HUMAN	STAT3	23291	25454.8	13708.5	15161.8	23612.6	21976.5	19668.4	17166.5	21087.7	21334.9
Q8IWB7	Q8IWB7	WDFY1_HUMAN	WDFY1	23286.8	23829.2	15656.1	17616.5	25234.2	25523.3	19294.7	19846.2	27713.1	28381.3
Q8N257	P06899;P23527;P33778;Q16778;Q6DN03;Q6DRA6;Q8N257	H2B3B_HUMAN	H2BU1	23241.7	32873	91540.5	237512	12140.3	10441.7	12123.4	16449.9	15116.2	12623.4
Q92619	Q92619	HMHA1_HUMAN	ARHGAP45	23202.5	25147.7	15720.5	17891.4	21126.7	20951	19041	17797.1	29462.9	27873.9
P18054	P18054	LOX12_HUMAN	ALOX12	23143.2	22891.2	9147.78	10355.1	22300.2	22719.7	18551.4	20483.2	20041.7	12630.6
P01034	P01034	CYTC_HUMAN	CST3	23135.9	21831.5	8602.46	8332.14	9285.44	7174.95	11859	9120.86	7455.82	8226.81
P14625	P14625	ENPL_HUMAN	HSP90B1	23078.1	23108.3	26268.6	23146.3	27503	27920.2	23337.4	23600.2	47300	44948.4
Q92499	Q92499	DDX1_HUMAN	DDX1	23066.6	20517.8	42372.5	40655.5	19992.2	20594.9	22333	23614.2	33685.6	33612.1
Q16543	Q16543	CDC37_HUMAN	CDC37	23050	23708.7	31388.8	30965.7	28204.3	26217.5	40221.7	40217.1	26780.1	22635.3
Q9Y3F4	Q9Y3F4	STRAP_HUMAN	STRAP	23039.2	23105.2	47742.6	49251.5	19760.1	17898.7	30436	30176.7	23272.9	22277.2
P48735	P48735	IDHP_HUMAN	IDH2	23020.7	25093.6	42283.8	21878.4	28684.8	29078	24230.3	18553.7	14784.7	22821.4
P03971	P03971	MIS_HUMAN	AMH	23018	16558.6	7084.47	10797.4	16415	20332.7	12443.9	15947.6	10375.9	5423.64
Q13867	Q13867	BLMH_HUMAN	BLMH	23009.5	26284.6	23895.1	17192.2	23133.8	22314.8	33002.6	39815.1	26142.6	29052.2
P30825	P30825	SL7A1_HUMAN	SLC7A1	23008	22464.4	23563.4	26552.2	20557.3	21404.2	56275.9	53898.8	14661.4	6692.87
Q92905	Q92905	CSN5_HUMAN	COPS5	22934.2	24818.3	22407.7	24004.8	25056.8	23058.1	20823.2	17368.3	18969	20869.9
P25325	P25325	THTM_HUMAN	MPST	22896.2	21910.9	14611.7	16591.5	22923.2	17771.1	16278.8	17518.9	27866.8	27400.3
Q9Y263	Q9Y263	PLAP_HUMAN	PLAA	22856	18306	21620.9	22148.8	22511.4	21730.6	24742	23767.1	26285.1	28574.8
Q06203	Q06203	PUR1_HUMAN	PPAT	22851.1	22581.5	30387.2	33908.3	20954.9	19743.1	23042.2	24462.6	22579.2	11727.4
P37108	P37108	SRP14_HUMAN	SRP14	22836.5	24472.4	30526.6	24498.7	5577.7	7756.91	10492	12336.7	32060.3	27879.9
P45974	P45974	UBP5_HUMAN	USP5	22819.9	21585.5	33556.6	34215.4	19075.2	19687.1	24910	25803.1	27695.8	26469.6
P23284	P23284	PPIB_HUMAN	PPIB	22813.5	21750.7	17430.5	16322.2	13249.3	15014.4	18914.3	16172.8	31074	28178.1
Q9NUQ9	Q9NUQ9	CYRIB_HUMAN	CYRIB	22809.4	22520.2	11384.2	12639.3	16102.6	16562.4	26918.3	26005.2	14614.5	13308.6
Q9P265	Q9P265	DIP2B_HUMAN	DIP2B	22808.3	24679.6	26553.4	27577.4	17275.3	16309.4	38007.9	37851.7	24260.3	24522.7
Q9UBQ7	Q9UBQ7	GRHPR_HUMAN	GRHPR	22799.8	27240.8	18010.5	14462.2	24357.8	22691.2	18599.8	16205.8	20067.9	15186.8
Q6NUJ1	Q6NUJ1	SAPL1_HUMAN	PSAPL1	22747.4	22254.7	27791	7947.88	6999.32	6638.33	31427	34320.6
P30101	P30101	PDIA3_HUMAN	PDIA3	22741.2	22156.1	23819.4	19182.6	22394.9	25860.2	19641.4	19147.1	53475.9	51240.3
O60234	O60234	GMFG_HUMAN	GMFG	22710.8	20873.9	7826.13	10650.3	18076.8	18826.2	15154	11868.3	18602.7	7186.89
P01772	P01762;P01763;P01767;P01772;P01780;A0A0B4J1V1;A0A0B4J1X5;A0A0C4DH42;A0A0J9YVY3;P0DP02;P0DOX2	HV333_HUMAN	IGHV3-33	22631	22362.2	5502.78	4159.57			15971.1	11046.8
O94973	O94973	AP2A2_HUMAN	AP2A2	22579.3	23319.6	21193.1	22038.5	18385	18673.8	23578.1	23718.8	17177.6	18450.4
Q13094	Q13094	LCP2_HUMAN	LCP2	22555.8	25170.8	6227.4	6188.37	21487.4	19340.7	14094.9	12059.1	18395.9	20576.2
Q01469	Q01469	FABP5_HUMAN	FABP5	22550.6	23398.8	37803.1	16977.5	15634.9	14143.6	20258.5	26293.7	11787.4	12256.4
Q15382	Q15382	RHEB_HUMAN	RHEB	22532.2	22323.3	26909.1	25552.7	14926.1	15001.9	44959.9	48963.7	7617.02	10058.3
P11362	P11362;P21802;P22455;P22607	FGFR1_HUMAN	FGFR1	22519	20983	5230	4908.59	19137.1	19287.8	11405.1	9942.18	11123.8	8216.57
P52597	P52597	HNRPF_HUMAN	HNRNPF	22506.4	21681.7	27302.2	26944.7	19729.6	20022.6	21942.2	22501.3	31284	30682.9
P48163	P48163	MAOX_HUMAN	ME1	22499.2	19486.8	14033.8	10510.8	26741.3	21824.9	20535.1	18586.9	12415.7	10710.2
Q9UKE5	O95819;Q8N4C8;Q9UKE5	TNIK_HUMAN	TNIK	22499.1	22901	17340.6	19482.9	23694.7	23901	21800.9	24163.5	16937.2	14083.7
Q8TBF2	Q8TBF2	PXL2B_HUMAN	PRXL2B	22462.7	50543	20563.7	23000.3	38929.8	38956.9	33140.9	29520.5	21704.6	19861.6
P17612	P17612	KAPCA_HUMAN	PRKACA	22422.1	24687.6	22114.1	19100.7	22898.9	26620.6	22431.4	31857.6	24454.9	16432.3
Q9Y316	Q9Y316	MEMO1_HUMAN	MEMO1	22400.6	22867.6	16448.2	17305.2	21393.8	24472.9	21273.5	20715.7	34269.7	32709.5
Q9P258	Q9P258	RCC2_HUMAN	RCC2	22390.9	20760.8	19462	21275.9	12551.3	11308.9	11640.6	11123.5	12205.8	11458.5
P09496	P09496	CLCA_HUMAN	CLTA	22303.2	22806.9	33354.3	32951.7	13301.4	11114.9	65049.5	69598.3	6550.3	11245.6
Q9HA65	Q9HA65	TBC17_HUMAN	TBC1D17	22226.1	24528.1	15490.9	16303.2	22766.1	23490.2	14266.2	15536.5	15266.9	16588.4
P06681	P06681	CO2_HUMAN	C2	22207.7	20709.2	6683.47	7255.46	16746.1	15593.8	12041.6	13773.8	16613.7	18389
Q9Y287	Q9Y287	ITM2B_HUMAN	ITM2B	22180.5	20446.9	15197.5	15655.7	23030.6	22684.7	12030.8	13703.5	16053.7	18831.7
O95954	O95954	FTCD_HUMAN	FTCD	22179.4	23342.6	14714.6	16699.1	25712.3	23999.2	31090.7	28724.9	16747.9	19168.2
P16109	P16109	LYAM3_HUMAN	SELP	22169.3	13707.5	15641.8	14917	8942.08	13400.3	32750	49235.7	17752.6	16080.2
Q9UPY5	Q9UPY5	XCT_HUMAN	SLC7A11	22160.9	25481.8	4364.11	3519.22			827.796	517.449	3145.46	2560.54
Q15691	Q15691	MARE1_HUMAN	MAPRE1	22133.2	22818.2	27331.6	26234.1	22592.5	22942.7	16294.9	13487.5	9822.67	12761.1
Q96IJ6	Q96IJ6	GMPPA_HUMAN	GMPPA	22131.7	29045.3	15366.7	17895.8	23840.6	27271.6	26363.4	23934.4	17880.4	22590.4
P51153	P51153	RAB13_HUMAN	RAB13	22121.4	24509.7	15771	16552.2	15150.5	13725.6	49612.9	47849.5	11589.5	12046.2
Q13310	Q13310	PABP4_HUMAN	PABPC4	22106.4	22450.1	10755.5	12006.2	10652.2	9940.32	12532.3	12744.1	33340.6	28462.1
P46934	P46934	NEDD4_HUMAN	NEDD4	22100.9	24591	14976.8	14777	15969	13445.8	28573.8	29537.2	30400.5	27404.6
O95865	O95865	DDAH2_HUMAN	DDAH2	22100.4	18697.6	19980.8	18037.7	20098.3	21781.3	38661.3	39432.9	26931.7	30021.2
Q16719	Q16719	KYNU_HUMAN	KYNU	22081.5	18768.5	10878.3	11408.5	22747.1	22398	17845.1	16757.6	15347.1	15116.5
Q14498	Q14498	RBM39_HUMAN	RBM39	22070.1	21088.1	21158.5	19939.9	15298.7	14109.9	18247.2	18437.3	18005.9	16200.6
Q14103	Q14103	HNRPD_HUMAN	HNRNPD	22067.4	25229.9	53638	49661.1	22915.5	22200.9	27654	30015.6	31389.6	28949
Q12907	Q12907	LMAN2_HUMAN	LMAN2	22039.8	20609.3	12740.4	13516.7	14007.1	16069.1	18424.8	20249	25277.2	24419.3
Q6P996	Q6P996	PDXD1_HUMAN	PDXDC1	22032.4	22511.9	17247.9	18251.6	22704.1	21653.2	18825.4	19994.7	14409.9	12843.8
Q9Y2T2	Q9Y2T2	AP3M1_HUMAN	AP3M1	22022.7	21821.7	12394.1	13727.5	22508	23793.1	21390	20432.9	15955.8	12467.3
Q9Y600	Q9Y600	CSAD_HUMAN	CSAD	21962	24667.4	17197.9	16478.6	28663.2	24707.5	17649.9	28123.7	21884.4	24860
P16144	P16144	ITB4_HUMAN	ITGB4	21912.1	24734.8	92603.4	103395	5600.43	7585.69	8134.69	8064.57	95947.8	100429
P02655	P02655	APOC2_HUMAN	APOC2	21851	19015.9	2228.93	3999.03	35586.4	38521.6	12670.1	8867.15	5157.55	6950.36
O43684	O43684	BUB3_HUMAN	BUB3	21846.9	20244.2	59762.5	66911.4	15421.9	13677.9	38091	35674.8	27948.8	31824.3
Q10567	Q10567	AP1B1_HUMAN	AP1B1	21840.6	22309.2	17319.8	20536.5	28880.2	31351.7	35726.7	35046.5	20517.5	21535.2
Q9Y6B6	Q9Y6B6	SAR1B_HUMAN	SAR1B	21825	19249.1	16645.3	14569.1	20330.6	23955.1	19437.9	19431.5	21622.1	22143.6
P33992	P33992	MCM5_HUMAN	MCM5	21819.5	20641.6	59026	63401.9	19932.8	17958.2	25833	24655.7	24283.7	26077.4
Q14118	Q14118	DAG1_HUMAN	DAG1	21773.5	22432.9	17410.2	17483.6	28075.7	27959.8	33182.9	33393.7	8768.61	7435.88
P46976	P46976	GLYG_HUMAN	GYG1	21762.2	23364.2	11682.6	14841.2	23321.8	23632.2	15466	14910.9	18930.6	13602.4
Q92556	Q92556	ELMO1_HUMAN	ELMO1	21759.7	21371	14794.5	15045.7	20939.8	20095.1	17960.1	16839.9	23589.1	23720.1
Q53RD9	Q53RD9	FBLN7_HUMAN	FBLN7	21758.4	21267.5	8486.54	8850.07	84205.4	86005.7	13713.1	13656.3	14195	14548.6
P23458	P23458	JAK1_HUMAN	JAK1	21732.7	20484.4	9942.31	10414.8	8971.94	9034.85	34373.3	33093.1	8832.6	10207.7
Q7KZF4	Q7KZF4	SND1_HUMAN	SND1	21712.3	22096.2	69282.4	72551.1	19504.8	19635.8	28609.1	28357.5	31605.3	31258.1
P54709	P54709	AT1B3_HUMAN	ATP1B3	21667.5	20396.5	191973	180850	41007.4	40926.3	186210	170630	50352	57355.8
P28072	P28072	PSB6_HUMAN	PSMB6	21654.5	21371	17631.2	16933	21647.9	19009.6	44378.8	43410.1	11793	15278.4
P61769	P61769	B2MG_HUMAN	B2M	21648.7	23734.4	23444.6	23078.3	16058.3	17366.6	43781.7	40351.4	18088.2	18809
P17302	P17302	CXA1_HUMAN	GJA1	21596.9	23362.6	7944.64	3422.87	4413.02	3178.61	2721.11	2864.35	3959.09	4154.41
Q6NY19	Q6NY19	KANK3_HUMAN	KANK3	21596.8	24528.1	13760.9	6396	38628.4	23092.5	34433	29215.6
Q96FV2	Q96FV2	SCRN2_HUMAN	SCRN2	21573	21821.3	11796.4	12695.8	18861.5	17514	13242.7	13291.7	17680.2	19064.9
P55268	P55268	LAMB2_HUMAN	LAMB2	21571.5	21757.5	24218.3	25525.9	24044.3	23977.8	26667.2	27998.1	47098.1	44724.2
Q9P289	O00506;Q9P289;Q9Y6E0	STK26_HUMAN	STK26	21561.8	21453.9	15502.3	15522.6	14145.2	14449.9	25786.8	25726.3	10426.5	11518.8
P42858	P42858	HD_HUMAN	HTT	21558.8	19431.1	20028.8	22255.2	23762.4	23383	19823.9	17743.6	25264	22456.4
P60891	P11908;P21108;P60891	PRPS1_HUMAN	PRPS1	21530.7	18730.8	24607.2	26283	21069.6	19230.3	27583.7	28622.6	20488.7	24606.7
Q8IWA5	Q8IWA5	CTL2_HUMAN	SLC44A2	21529.4	23151.1	12430.7	15568.8	26240.4	31659.1	34519.4	41262.8	27002.6	25778
P55160	P55160	NCKPL_HUMAN	NCKAP1L	21485.9	24096	11995.8	12672.2	26185.9	26935.4	18819.9	21236.2	16565.4	21120.4
P17050	P17050	NAGAB_HUMAN	NAGA	21470	22479.4	14426	7975.23	19558.5	22142.3	16554.8	15764	8070.16	7878.03
P15170	P15170;Q8IYD1	ERF3A_HUMAN	GSPT1	21456.3	22541.3	23905.4	23544.2	14466.3	16434.8	27145.5	24564	31036.9	26014.4
Q96FW1	Q96FW1	OTUB1_HUMAN	OTUB1	21449.6	20528.8	20673	23290.6	22110.2	19818.8	14720.7	18777.2	9975.74	15482.4
Q96CS7	Q96CS7	PKHB2_HUMAN	PLEKHB2	21443.8	25338.5	16393.3	19252.3	14967.2	14938.1	25932.6	25398.3	46207.3	38036
Q9NV70	Q9NV70	EXOC1_HUMAN	EXOC1	21432.9	23606.6	22496.9	22376	24854.7	24064.4	20926.1	19574.5	31127.1	28287.7
Q8N5I2	Q8N5I2	ARRD1_HUMAN	ARRDC1	21432.5	20069.1	66565.5	79914.4	22393.5	22873.3	57531	74714.1	58119.4	60268.6
P41240	P41240	CSK_HUMAN	CSK	21418.4	19364.2	19516.3	19409.8	19181.1	17238	24246.5	23557.4	27358.8	28735.2
P09382	P09382	LEG1_HUMAN	LGALS1	21400.4	19215.8	53609.2	52622	39625.2	36132.3	37784.6	40424.9	25571.3	30313.5
Q9UKU9	Q8NI99;Q9UKU9	ANGL2_HUMAN	ANGPTL2	21357.3	21844.3	9966.05	9360.03	33715.3	32371.8	19867.9	17738	18418.3	20325.4
O00469	O00469	PLOD2_HUMAN	PLOD2	21333.6	21152	2600.98	3066.44	35074.3	36433.4	14921.7	15177.1	11941	10912.4
P49184	P49184	DNSL1_HUMAN	DNASE1L1	21319.1	21131.8	17874.5	20678.1	12175.7	11133.7	12330.1	11966	31010.8	29626.9
P04080	P04080	CYTB_HUMAN	CSTB	21286.5	17371.8	70005.8	18044.1	5958.29	5319.22	39971.8	35989.6	2345.69	4825.33
P04156	P04156	PRIO_HUMAN	PRNP	21249.9	28050.6	22663	27399.8	9359.39	7764.97	7175.74	10502.3	5735.27	10176.3
Q01415	Q01415	GALK2_HUMAN	GALK2	21243.7	21688.8	9394.88	12055.3	20795.1	24403.4	13039.1	15491.8	23485.1	29395.4
P16278	P16278	BGAL_HUMAN	GLB1	21242	19647.5	13618.2	12161.9	4030.48	4149.15	34404.7	33845.4	6924.7	6851.76
Q96CX2	Q96CX2;Q68DU8	KCD12_HUMAN	KCTD12	21213	21053.2	9016.49	9866.16	20627.1	16346.8	12086.4	11719.3	16643.6	16421.5
Q9HB71	Q9HB71	CYBP_HUMAN	CACYBP	21201.1	20403.7	24789.6	25284.6	17005	19292.5	35528.7	33077.6	22362	20679.8
Q9NRM6	Q9NRM6	I17RB_HUMAN	IL17RB	21098.1	17877.7	11887.1	15089.9			11293.9	14453.1
Q14978	Q14978	NOLC1_HUMAN	NOLC1	21073.9	19450	18382.5	19714.6	17027.5	26144.1	11728.7	14404.2	9127.74	10014.2
Q9H7D0	Q9H7D0	DOCK5_HUMAN	DOCK5	21059.2	21549.7	12559.7	12796.9	21654.2	23218.4	18670.2	17811.4	21785.7	20749.4
Q6XQN6	Q6XQN6	PNCB_HUMAN	NAPRT	21046.3	20136.4	19382.1	20622.3	21519.4	18686.6	24701	24474.7	28977.2	25695.8
Q9BRX2	Q9BRX2	PELO_HUMAN	PELO	21004.1	22743.1	10295	11500.7	17402.3	15323.6	12989.2	13326.2	17067.6	17133.8
P53004	P53004	BIEA_HUMAN	BLVRA	20973.9	20016	12119.3	11290.1	20361.2	21459.7	17618.1	17895.8	18862	23739.3
Q8N131	Q8N131	PORIM_HUMAN	TMEM123	20966.3	19664.4	15770.3	16216.6	3243.73	5392.49	26284.2	23586.4	26033	19754.6
Q06124	Q06124	PTN11_HUMAN	PTPN11	20941.4	20379.4	14739.3	16044.8	19410.4	18933	26055.7	26050.4	17395.3	18644.3
Q86XF0	Q86XF0	DYR2_HUMAN	DHFR2	20934.7	13008.6			23518.2	21532.2	11742.3	12907.8
P54840	P54840	GYS2_HUMAN	GYS2	20922.1	22900.6	8110.48	7815.49	25653.7	26485.2	12999.9	13162.6	11038.4	12232.2
Q9Y5B9	Q9Y5B9	SP16H_HUMAN	SUPT16H	20912.6	22068.7	83918.2	85640.4	9698.06	9561.39	13676.3	13173.9	19554.7	18767.9
Q13740	Q13740	CD166_HUMAN	ALCAM	20902.6	20455.4	5424.12	5743.74	14434.1	13812.9	6548.36	6223.06	35897.9	35901.7
Q4LDE5	Q4LDE5	SVEP1_HUMAN	SVEP1	20894.7	18184.4	11194.4	13217	49651.4	53221.3	13474.9	15520.3	24608.5	23325.2
P41250	P41250	GARS_HUMAN	GARS1	20871.9	22906.2	44412.3	47968.4	20590.9	21605.5	33431.4	28809.8	29251.2	28716.7
Q01658	Q01658	NC2B_HUMAN	DR1	20829.9	19961.7	11070.8	9215.83	13560.1	16554.5	10254.5	7609.58	3399.26	3898.3
P29144	P29144	TPP2_HUMAN	TPP2	20799	22378.1	28960.5	32195.8	14640.7	14951.1	15535.2	17102	22312.8	23456.3
P22413	P22413	ENPP1_HUMAN	ENPP1	20766	13054.6	5081.65	5134.19	20802.1	19059.9	15552.5	18085.8	12433.3	11852
Q9NPG4	Q9NPG4	PCD12_HUMAN	PCDH12	20759.8	19958.5	5696.94	7705.87	21238.1	23152.6	12844.4	11033.4	23824	28667.4
Q6W4X9	Q6W4X9	MUC6_HUMAN	MUC6	20731.7	18917.2	5647.87	12421.3	32175.5	29896.3	13547.2	15029.8	18183.4	24279.7
Q09666	Q09666	AHNK_HUMAN	AHNAK	20701.3	20054.6	40301.6	32727.2	15677.5	16059.3	30708.1	31762.2	15192.1	16331.7
P00374	P00374	DYR_HUMAN	DHFR	20673.9	26790.9	10401.7	9613.1	25203	24708.6	22316.8	19741.7	41204	34926.1
Q4KMQ2	Q4KMQ2	ANO6_HUMAN	ANO6	20645.1	22042.7	17051.4	19252.4	10828.7	12228.7	31849.2	33436.1	12514.1	12726.6
P01857	P01857;P01860;P01861;P0DOX5	IGHG1_HUMAN	IGHG1	20618.5	19182.7	44834.4	7078.35	20526.5	17105.6	30569.4	47527.7
P29992	P29992	GNA11_HUMAN	GNA11	20615.5	21032.2	16433.6	16629.3	12850.8	17637.1	39671	43564.2	13432.3	13106.8
P13861	P13861	KAP2_HUMAN	PRKAR2A	20601.4	20676.1	18272.5	18193.9	18900.8	18357.7	20346.9	19854.9	18777	19358.4
P49915	P49915	GUAA_HUMAN	GMPS	20597.9	21759.5	35359	38413.3	20154.1	20637.3	24157.5	25895.3	21157.2	25564.5
P07988	P07988	PSPB_HUMAN	SFTPB	20570.7	19620.6	7851.28	9558.41	19020	16947.4	16075.7	12860	1395.45	1847
P48960	P48960	AGRE5_HUMAN	ADGRE5	20540.4	19062.5	26019.5	26879.3	12883.8	13029.5	34756.6	27424	13330	14191.3
P16118	P16118	F261_HUMAN	PFKFB1	20529	21113	14517.7	16977.6	18239.6	17225.9	20686.2	18040	23243.8	20395.4
P47895	P47895	AL1A3_HUMAN	ALDH1A3	20513.5	18636.3	36765.4	34438.2	18937.6	18060.4	15721	15498.2	29228.1	27592.2
O75369	O75369	FLNB_HUMAN	FLNB	20512.5	20676.6	29594.3	29355.9	22183.2	21066	19280.8	19844.4	35998.9	37327.7
P49902	P49902	5NTC_HUMAN	NT5C2	20496	19458.1	13355.5	15770.5	20482.6	19630.6	13699.5	14023.1	19985.7	19809.3
O94985	O94985	CSTN1_HUMAN	CLSTN1	20450.2	22489.8	25165.2	25747.5	9749.81	9278.37	12968.2	15653.9	16808.1	20409.1
P09960	P09960	LKHA4_HUMAN	LTA4H	20422.7	19302.9	22938.4	20981.6	15681.9	18082.3	26398.8	25549.5	16844.4	16761.9
P49841	P49840;P49841	GSK3B_HUMAN	GSK3B	20418.8	22760.4	14873.1	16094.7	14943.6	14241.5	15944.9	15176.5	19892.1	17679.1
Q8WWN8	Q8WWN8	ARAP3_HUMAN	ARAP3	20408.5	20435.9	14040	14624.5	20662.1	22617.2	18370.6	17112	26438.2	25640.9
O75751	O75751	S22A3_HUMAN	SLC22A3	20396.8	23691.2	1330.54	1636.42
Q04695	Q04695	K1C17_HUMAN	KRT17	20394.3	32724.7	636708	14627.4	18189.5	4245.69	45127.8	59347.2	87773.7	77295.2
Q13410	Q13410	BT1A1_HUMAN	BTN1A1	20317.8	20835.9	6997.43	6958.36			43477.5	47800.8
P17066	P17066;P48741	HSP76_HUMAN	HSPA6	20315.6	19258.4	22492.6	17608.3	17817.2	19354.7	33100.8	35679.2
P05141	P05141;P12235;P12236;Q9H0C2	ADT2_HUMAN	SLC25A5	20265.6	21639.8	32821.4	8662.62	11748.9	11829.5	23521.9	22123.5	13267.9	15971.2
Q9P2J5	Q9P2J5	SYLC_HUMAN	LARS1	20261	22151	47427	46787.2	20394.5	19481.7	33616.8	33741.9	31477.3	31753.1
P56945	P56945	BCAR1_HUMAN	BCAR1	20233.4	17068.9	9994.27	13177.5	17771.5	13200.8	24549.3	27182.7
Q9BYF1	Q9BYF1	ACE2_HUMAN	ACE2	20218.5	18330.3	6428.03	7313.88	14694.5	18115.1	15363.2	15917	4481.2	5547.52
P06865	P06865	HEXA_HUMAN	HEXA	20217.2	17624.1	12684.5	5445.54	5056.57	3894.09	14288.6	15872.6	6734.4	6893.71
P10768	P10768	ESTD_HUMAN	ESD	20212.3	15830.6	34180.4	40408.7	14716.7	15833.6	30411.7	29448.2	33818	34804.4
Q9H2H9	Q9H2H9	S38A1_HUMAN	SLC38A1	20198.2	22512.8	24748.6	29474.1	5393.53	5643.95	73125	87970.1	12761.1	16024.3
P49746	P49746	TSP3_HUMAN	THBS3	20194.8	22294.4	14342.3	13297.8	28004.1	30210.3	12989.1	11541.9	22718.1	23875
O43505	O43505	B4GA1_HUMAN	B4GAT1	20183.3	22043.5	5571.21	5712.07	23785.8	22009.3	11170.9	11290.1	18681	18016.3
O95716	O95716;P20336	RAB3D_HUMAN	RAB3D	20168.3	18667	9589.43	11014.6	11987	12048.6	20874.9	26705	16333.3	17948.6
P30273	P30273	FCERG_HUMAN	FCER1G	20157.5	18817.9	12176.7	11555.3	11496.2	11596.2	35505.4	22390.9	16166.2	15810.2
Q8NF91	Q8NF91	SYNE1_HUMAN	SYNE1	20156.4	20728.8	13380.7	14866.9	23660.5	24041.1	18196.9	15539.4	24224.1	27912
Q96K76	Q96K76	UBP47_HUMAN	USP47	20151.9	19664.4	22340	23841.1	17856.5	18931.4	17556.5	17563.9	19640.7	20487.2
P04040	P04040	CATA_HUMAN	CAT	20124.5	24244	12296	10506.4	17523.7	13762	28208.1	28711.1	11591.9	15163.4
P28065	P28065	PSB9_HUMAN	PSMB9	20108.3	25475.9	2451.41	4917.12	27460.3	20214.2	15144.5	15082.3	4562.82	6990.25
Q9NZH0	Q9NZH0	GPC5B_HUMAN	GPRC5B	20060	21959.9	3360.03	3475.13	5247.26	4083.56	5523.22	4632.54
Q96D31	Q96D31	CRCM1_HUMAN	ORAI1	20054.7	21738	9570.46	9328.11	9139.11	11364.2	19052.5	20491.1	10043.6	9613.48
P11532	P11532	DMD_HUMAN	DMD	20025.1	24215.1	12556.3	14871.8	23027.3	21463.1	32470.2	39878.5	6926.28	8508.77
Q9Y6Y8	Q9Y6Y8	S23IP_HUMAN	SEC23IP	20014.6	17918.3	17573.3	18689.7	17073.1	17678.1	48704.9	49672.7	14390.4	14455.3
Q9Y6R7	Q9Y6R7	FCGBP_HUMAN	FCGBP	20002.3	21094.7	7744.1	8729.64	18246.5	18589.7	19557.3	18762.5	2022.76	5463.25
Q9NVG8	Q9NVG8	TBC13_HUMAN	TBC1D13	19997.9	20072.6	15956.5	18289	19461.4	21440.4	16585	21806.8	27313.5	28209
Q9NZ32	Q9NZ32	ARP10_HUMAN	ACTR10	19946.5	17815.5	14052.4	15237.6	18707	18806.4	17486.8	17817.6	13073	10396.2
P08833	P08833	IBP1_HUMAN	IGFBP1	19943.3	16814.8	4190.59	3943.02	30814.9	34581.6	7822.27	9735.28
Q96F07	Q96F07	CYFP2_HUMAN	CYFIP2	19933.1	23144.3	10666	11474.7	23988.8	19739.4	15153.4	16627.4	14766	18564
P10746	P10746	HEM4_HUMAN	UROS	19902.9	23169	8254.36	9841.77	129028	127124	61614.6	66255.3
P09493	P09493	TPM1_HUMAN	TPM1	19882.9	17357.5	32439.1	15604.3	44686.9	42480.3	17636.3	20172.4	5108.18	5583.14
P35222	P35222	CTNB1_HUMAN	CTNNB1	19850.5	18165.8	65082.6	75705.3	13950.6	15231.2	8751	10320.3	13882.5	15033
Q5XPI4	Q5XPI4	RN123_HUMAN	RNF123	19838.9	20694.9	18598.1	18300.3	21102.9	22096.9	21332.4	21750.4	24364.8	24603.2
Q9Y3Z3	Q9Y3Z3	SAMH1_HUMAN	SAMHD1	19782.2	23302.4	17836.7	18213.7	17672.7	18955.8	16646.3	15341.6	19464.2	21354.8
O43252	O43252	PAPS1_HUMAN	PAPSS1	19781.7	19121.6	21013.1	24350.4	21231.2	23409.7	22926.9	24429.5	19796.3	22638.2
P11150	P11150	LIPC_HUMAN	LIPC	19749.9	23110.6	13458.1	10261.7	20842.8	22994.4	19720.3	15908
Q6DD88	Q6DD88	ATLA3_HUMAN	ATL3	19748.7	20172.1	9915.74	8825.23	21253.7	18370.7	13010.7	14883.6	36478.5	37075.9
Q02750	P36507;Q02750	MP2K1_HUMAN	MAP2K1	19720.8	21766.2	15294.8	16824.8	22770.8	22296.4	16678.3	17728.4	28054.6	26717.4
Q15818	Q15818	NPTX1_HUMAN	NPTX1	19716.8	20608.3	5410.96	6272.72	30665.8	27821	55633.9	53265.4	29289.4	29726.2
Q13148	Q13148	TADBP_HUMAN	TARDBP	19689.3	20687.5	29330.8	27967.2	16275.1	16434.4	17790.5	18843.9	19107.9	20042.6
P35555	P35555	FBN1_HUMAN	FBN1	19680.5	22270.3	8626.37	10172.2	45519	45271.6	13931.1	15198.3	22395.1	25488
Q8N3C0	Q8N3C0	ASCC3_HUMAN	ASCC3	19630.4	19354.4	27597.8	27296.1	17117.6	14771.1	16535.9	17181.4	31042.6	29907.3
Q92930	Q92930	RAB8B_HUMAN	RAB8B	19600.5	18032.6	9753.21	10965.7	12436.2	12401.3	25479.8	24371.4	13414.2	12375.1
Q92859	Q92859	NEO1_HUMAN	NEO1	19596.2	21183.3	7420.75	6927.38	16520.7	16748.2	16314.7	15172.6	15675.4	16894.4
Q9BSA4	Q9BSA4	TTYH2_HUMAN	TTYH2	19582.7	23115.5	6686.9	8986.63	17389.2	18566	36815.9	34892.2	10432.1	8426.43
Q9Y4E8	Q9Y4E8	UBP15_HUMAN	USP15	19581.6	18442	14185.9	16806	15753.8	14676.1	16719.3	16386.9	16678.7	15258.8
Q9BQA1	Q9BQA1	MEP50_HUMAN	WDR77	19573.3	20115.9	32522.4	33950.1	20609	14008.3	24443	30950.1	30641.3	28516.5
Q9UKV8	Q9H9G7;Q9HCK5;Q9UKV8;Q9UL18	AGO2_HUMAN	AGO2	19555.7	19413.9	15330.5	15819.8	23177.7	22882.2	16024.5	15731.4	21478	23223.4
Q9Y383	Q9NQ29;Q9Y383	LC7L2_HUMAN	LUC7L2	19528	19354	11199.2	12355.6	14568.5	14439.2	12466.6	11598.9	8813.09	8604.62
O95373	O95373	IPO7_HUMAN	IPO7	19497	19696.3	35037.4	36374	21261.7	21144.3	19371.5	20320.1	26559.4	26811.7
P21266	P21266	GSTM3_HUMAN	GSTM3	19488.3	28389.6	8274.53	11445.7	20964.3	28313.1	42574.8	37801.7	57458.8	54022.7
Q96J02	Q96J02	ITCH_HUMAN	ITCH	19481	19105.1	13552.5	14451	11850.6	10991.8	15908.1	15559.1	41103.3	43410.9
Q8IVT5	Q6VAB6;Q8IVT5	KSR1_HUMAN	KSR1	19475.1	18917.6	8684.04	9283.79	18385.8	20264.2	19398.8	17290.6	23235.3	26685.6
P26196	P26196	DDX6_HUMAN	DDX6	19452.7	19357.8	31800.4	35479.6	15976.7	16566.7	21885.7	24309.1	33819.1	31213.3
Q08257	Q08257	QOR_HUMAN	CRYZ	19447.7	18980.8	20041.6	15541.1	19329.7	17638.2	18962.7	20852.8	18637	44062.9
P46087	P46087	NOP2_HUMAN	NOP2	19443	19838	83679.5	86321.2	7019.87	8128.6	36764.8	32221.7	28235.6	29365.5
Q9UHG3	Q9UHG3	PCYOX_HUMAN	PCYOX1	19427.4	16246.6	22871.6	11604.1	24285.7	19066.4	20296.7	21882	11336.8	9929.3
Q9Y4D8	Q9Y4D8	HECD4_HUMAN	HECTD4	19355.6	20464.6	8462.48	8536.58	23584.6	24042.5	14847.9	14925.3	17894.3	15730
Q92621	Q92621	NU205_HUMAN	NUP205	19352.2	18709.3	29588.7	32175.3	17515.8	18867.8	17549.4	17639.1	27844.2	20790.3
Q53H76	Q53H76	PLA1A_HUMAN	PLA1A	19333	19783	8885.78	10931.1	23869.5	27102.7	16253	14097.8	16666.5	20160
Q9Y289	Q9Y289	SC5A6_HUMAN	SLC5A6	19313.4	19032.2	40458.3	46509.8	4195.54	5694.77	18251.8	19248.6	11578.7	9581.21
O75390	O75390	CISY_HUMAN	CS	19294.7	17846.3	48867.5	38057.9	14870.9	12268.5	35773.7	27983.6	20370.4	19348.2
O43795	O43795	MYO1B_HUMAN	MYO1B	19291.2	18998.6	26920.3	27819.9	11042.2	10790.1	19566	18381.6	22666.3	26957.3
Q8N699	Q8N699	MYCT1_HUMAN	MYCT1	19288.5	20350.5	9606.41	10249.9	16317.5	18346.2	23715	21626.5	11679.3	12295.3
Q9BZQ8	Q9BZQ8	NIBA1_HUMAN	NIBAN1	19269.4	18691.9	8161.77	8683.93	21031.1	20531.5	22490.9	23949.4	23067.5	21500.7
Q9Y4H4	Q9Y4H4	GPSM3_HUMAN	GPSM3	19230.3	17904.2	11128.1	11259.5	7189.15	7535.04	30223.2	35035.7	12331.2	9870.31
O43157	O43157	PLXB1_HUMAN	PLXNB1	19216.4	27916	10446	12778.6	27364.5	24131.5	29367.7	41777.5
Q96PD2	Q96PD2	DCBD2_HUMAN	DCBLD2	19214.8	18602.7	6954.16	8302.98	2949.47	3692.09	3162.13	3812.17	7278.78	8037.33
P19320	P19320	VCAM1_HUMAN	VCAM1	19191.6	15156.4	6387.44	6860.29	17049.3	21782.5	10845.3	12523.4	7081.62	8279.14
O15084	O15084;Q8N8A2	ANR28_HUMAN	ANKRD28	19189.9	19542.6	18678.7	18892.4	19612.5	21277.2	17022.6	16485	24541.3	22664.6
Q16531	Q16531	DDB1_HUMAN	DDB1	19189.3	19124.1	25482.8	26005	17883.7	17910.1	18217.4	18920.7	15551.9	20951.3
Q12768	Q12768	WASC5_HUMAN	WASHC5	19159.5	17628	12549.7	12189.5	16672.8	16469.3	13779.4	15026.5	18582.7	14558.3
P48729	P48729;Q8N752	KC1A_HUMAN	CSNK1A1	19133.8	16073.1	24968	26231.2	10022.6	10859.7	14224.9	16635.6	11915.1	10672.2
P61088	P61088	UBE2N_HUMAN	UBE2N	19104.5	18693.6	17700.4	16847.9	18231.4	17187	22528.6	25297.3	12595.9	14277.2
P29350	P29350	PTN6_HUMAN	PTPN6	19098.8	18352.7	14601.2	15467.2	19795.1	20495.2	14362	14528.7	20063.2	21675
P25940	P25940	CO5A3_HUMAN	COL5A3	19079.5	21391	3247.72	3644.86	7651.62	5621.73	8246.57	7442.58	4064.38	13001.1
Q9UKG1	Q9UKG1	DP13A_HUMAN	APPL1	19034.2	15553.7	16260.4	17097.1	16171.8	17428.4	15114.5	15969.1	16431.4	13960.6
P24941	P24941;Q00526	CDK2_HUMAN	CDK2	19030.3	19207.7	14573	17466.5	18262.3	20627.7	24486.8	21564	26644.3	23611.3
P13674	P13674	P4HA1_HUMAN	P4HA1	18991	20340.6	8753.17	10513	21065.6	22236.1	10583.4	9690.83	13875.6	13697.5
Q5VT79	P13928;Q5VT79	AXA81_HUMAN	ANXA8L1	18930.3	18596.4	13631.1	13318.3	38135.9	36115.6	21231.3	20881.1	26773.7	29024.5
O43815	O43815	STRN_HUMAN	STRN	18851.5	19910.5	18327	17796.9	22741.7	23065.3	18954	21703.5	19416.8	20030.5
Q9Y376	Q9Y376	CAB39_HUMAN	CAB39	18840.5	18421.7	14729.7	16346	14839	15304.9	26584.7	29285.6	10009.2	10618
O43897	O43897	TLL1_HUMAN	TLL1	18805.8	23865.8	11858.1	9823.58	35348.1	30999.9	26687.8	29014	10011.8	13101.6
Q02153	Q02153	GCYB1_HUMAN	GUCY1B1	18784.9	20704.4	16052.3	16263.5	17361	18057.6	16269.6	16189.7	25136.6	22615.4
A8TX70	A8TX70	CO6A5_HUMAN	COL6A5	18775.1	21095	7581.7	8313.25	24240.6	24050.8	26337.5	22590.5	2152.3	2095.12
O75116	O75116	ROCK2_HUMAN	ROCK2	18768.8	18251	22719.1	22793.7	16978.8	18390.8	18851.4	16390.9	24198.9	23560.6
Q92882	Q92882	OSTF1_HUMAN	OSTF1	18725.8	18491.8	6095.86	7312.65	14299.8	11170.7	12300	11042.3	7027.08	6933.53
Q86X55	Q86X55	CARM1_HUMAN	CARM1	18721.8	20249.7	16614.4	17411.6	18729.2	20754.4	20753.4	19939.2	18979.8	15992.3
P35916	P35916	VGFR3_HUMAN	FLT4	18720.3	18670.7	3347.08	3700.16	24054.4	22998.7	8871	13833.2	14277.3	16558
Q9UMS4	Q9UMS4	PRP19_HUMAN	PRPF19	18693.7	21137.5	56788.2	54601.2	11333.9	9862.02	18558.9	18934.6	23702.9	20216.6
P15151	P15151	PVR_HUMAN	PVR	18653	29046.1	10033	11852.4	9425.7	9823.76	19613	21073.2	13351.6	10848.2
P62318	P62318	SMD3_HUMAN	SNRPD3	18646.3	23729.2	63230.4	58559.6	13399.9	14520.9	23605.2	22713.6	1375.1	2255.07
Q13425	Q13425	SNTB2_HUMAN	SNTB2	18645.4	16338.4	10923.8	11962	15458.3	16534.3	22280.4	22012.6	14624.3	14976.2
Q9UL26	Q13636;Q9UL26	RB22A_HUMAN	RAB22A	18641.2	18846.7	18304.7	21688.6	13207.2	12486.4	21154.4	25527.9	15202.2	17133.3
Q9NSD9	Q9NSD9	SYFB_HUMAN	FARSB	18609.9	18437.7	30284.1	32934.9	20221.7	18175.4	22846.5	22174.1	26273.1	19226.6
Q86UD1	Q86UD1	OAF_HUMAN	OAF	18593.6	14377.7	5904.82	7415.56	21320.3	16680.3	15022.8	15750.8	3750.85	3627.11
O14972	O14972	VP26C_HUMAN	VPS26C	18591.8	20401.6	15416.8	17597	21142.6	20670	11579.2	15799.4	21417.2	16243.8
O60911	O60911	CATL2_HUMAN	CTSV	18585.4	16459.7	80814.9	7730.82	7973.7	6779.53	17596.7	20676	15685.3	12264.8
Q15102	Q15102	PA1B3_HUMAN	PAFAH1B3	18573.7	16119.5	22468	25360.9	13359.8	15372.9	26679.8	25480.6	17600.4	12826.5
Q05209	Q05209	PTN12_HUMAN	PTPN12	18569.9	19174.6	14780.8	15093.7	19291.7	17757.8	18541	14720.7	21373.8	18042.5
P25705	P25705	ATPA_HUMAN	ATP5F1A	18568.1	15955.6	56662.7	8895.13	14818.7	16124.9	15391	14320.2	14575.8	13524.6
Q9Y485	Q9Y485	DMXL1_HUMAN	DMXL1	18544.1	16183.6	10700.2	10331.4	16149.2	17802.6	13382	13780.6	20685.2	19333.2
O60637	O60637	TSN3_HUMAN	TSPAN3	18530.4	19670.5	9826.75	10196.3	3174.72	4036.04	76688.6	70228.9	3624.15	4380.38
Q9H0M0	Q9H0M0	WWP1_HUMAN	WWP1	18522.7	19570.7	5608.45	7667.74	18813.9	20161.7	19266.4	15727.6	12195.4	17649.2
Q9NY35	Q9NY35	CLDN1_HUMAN	CLDND1	18513.3	14719.7	16278.8	17433.3	5087.19	6069.9	17241.1	18515.2	14126.4	10925.6
Q15041	Q15041	AR6P1_HUMAN	ARL6IP1	18507.7	25419.7	14616	14420.3	18338.3	11235.7	10982	14580.8	16078.3	11206.6
O75367	O75367	H2AY_HUMAN	MACROH2A1	18503.9	17079.9	66826.7	58871	8515.35	7567.15	8617.21	7729.44	49615.4	35203.2
Q96RT1	Q96RT1	ERBIN_HUMAN	ERBIN	18445	20471	13172.6	14708.4	11728.1	11397.2	29197.4	28641.1	9758.14	13204.3
P35659	P35659	DEK_HUMAN	DEK	18440.6	19756.5	11282.7	9613.83	16851	16755.9	11579	11819.3	9972.61	9996.9
P30419	P30419	NMT1_HUMAN	NMT1	18419.3	18721.4	26185.2	26293.8	18814.2	19170.2	20863.3	18900	15864.5	14518.1
P55212	P55212	CASP6_HUMAN	CASP6	18404	19480.5	13788.7	14347.8	21454.4	20325.8	15672.4	16902.6	9757.21	12548.8
Q9H7P6	Q9H7P6	MB12B_HUMAN	MVB12B	18381.5	17333	7536.07	6872.96	7014.63	8772.81	9864.21	7684.71	10962.4	14422.4
P48723	P48723	HSP13_HUMAN	HSPA13	18378.7	16224.2	9894.99	10564.9	20070.3	19006.4	12546.4	13046.3	15432.7	13431.7
P19784	P19784	CSK22_HUMAN	CSNK2A2	18357.7	18809.3	35610.5	36662.7	17009.9	15570.8	16385.1	16052.9	19241.3	16842.9
Q9NT62	Q9NT62	ATG3_HUMAN	ATG3	18349.8	18924.6	17379.1	17737.5	18228	20029.2	19864.3	18615.7	15507.2	21505.5
Q96KG9	Q96KG9	SCYL1_HUMAN	SCYL1	18305.1	18071.1	16728.8	17351	20256.6	18615.4	13452.2	16024.9	15818.5	19182.2
Q09028	Q09028	RBBP4_HUMAN	RBBP4	18292.9	16092.1	29781	34857.5	16385.3	11272.1	18519.9	19699.6	18196.7	16887.5
Q86X29	Q86X29	LSR_HUMAN	LSR	18248.2	19806.9	125325	111999	3908.44	17274.5	26298.9	24970.2	30506.6	31115.9
P35520	P35520	CBS_HUMAN	CBS	18240.7	19600	14081.6	11839.8	19257.2	17805.9	19638.3	18081.7	17832.8	16627.3
P10321	P10321	HLAC_HUMAN	HLA-C	18233.1	29938	32025.7	34888.2	6448.97	7806.25	79481.1	71474.9	2883.55	4104.58
Q04760	Q04760	LGUL_HUMAN	GLO1	18196.9	16307.4	15873.1	15745.5	17527.2	14793.6	22666.1	22650.9	10557.2	17997.5
O60547	O60547	GMDS_HUMAN	GMDS	18194.7	19668.7	28665.7	28869.4	20573.2	22293	21146.4	20400.3	25816.2	24453.6
Q9BTT0	Q9BTT0	AN32E_HUMAN	ANP32E	18139.1	18590.6	7565.45	8068.7	14985.8	11947.6	12203.9	10211.3	6382.63	5781.93
Q9Y5K8	Q9Y5K8	VATD_HUMAN	ATP6V1D	18099.2	18889.9	14530.3	15420.3	18158.8	19751.4	13647.3	9870.04	10358.5	10173.4
O75643	O75643	U520_HUMAN	SNRNP200	18019.5	19512.6	63867.9	67810	11439	10707.2	18646.1	17434.1	19965.6	20325.1
Q9UI12	Q9UI12	VATH_HUMAN	ATP6V1H	17988.3	18606.7	15678.2	16965.8	19372.6	18239.3	17651.4	16262.9	19553.8	20200.8
Q8WUJ3	Q8WUJ3	CEMIP_HUMAN	CEMIP	17984.8	16555.4	18365.4	18773.6	15302.7	15811.1	10401.9	10058.5	13156.7	17356.6
P80723	P80723	BASP1_HUMAN	BASP1	17955.9	16094.9	1255.01	912.401	6085.63	6503.24	78067.7	79294.4	2542.74	3132.33
Q15172	Q15172	2A5A_HUMAN	PPP2R5A	17943.7	18356.5	12030.6	11951.3	21244.9	20420.8	17303	16694.7	12605	11800.1
P33552	P33552	CKS2_HUMAN	CKS2	17936.2	18772.1	2091.05	1778.82			3106.14	3305.93
P62304	P62304	RUXE_HUMAN	SNRPE	17910.5	20544.7	65585.4	56086.8	12684.6	12581.3	26308.3	24361.2	16489.8	21500.8
Q9UI42	Q9UI42	CBPA4_HUMAN	CPA4	17879.8	16920.7	28068.2	5983.69	8353.55	7310.83	26043.4	32661.2	5760.66	5967.48
Q6ZRP7	Q6ZRP7	QSOX2_HUMAN	QSOX2	17873.3	19136.6	16887.9	17647.2	18496.7	14388.9	18681.2	19174.4	24303.2	20147.3
Q9ULA0	Q9ULA0	DNPEP_HUMAN	DNPEP	17836.6	18666.6	21955.5	21045.6	18512.5	19824.6	14393.5	11658.5	26737.4	22753
Q9Y4L1	Q9Y4L1	HYOU1_HUMAN	HYOU1	17832.4	14923.4	26781.3	25124	16854.8	16854.2	15090.8	18542.2	37026.4	34282
P22303	P22303	ACES_HUMAN	ACHE	17823.7	15863.9	6685.1	6480.01	17009.7	15968	13722	10477.4	22295.4	19400.6
Q15124	Q15124	PGM5_HUMAN	PGM5	17763.7	16407.5	9161.51	9417.09	16184	16373.5	13132.6	12758.6	14809	15411.2
Q96J84	Q96J84	KIRR1_HUMAN	KIRREL1	17742	20345	7359.57	7476.37	6901.3	6691.99	29964.2	28062.3	19665.3	24118.5
Q14766	Q14766	LTBP1_HUMAN	LTBP1	17714.4	17892.7	5483.47	7389.87	19755	21583.9	11174.7	11722.6	13093.7	14385.8
Q5T750	Q5T750	XP32_HUMAN	XP32	17699.7	23922.8	10654.8	11445.5	11995.3	23970.7	53120.6	77778.4
Q13557	Q13557	KCC2D_HUMAN	CAMK2D	17691.3	16186.2	18921.5	19881.7	9984.92	10449	10607.4	10433.5	13973	11533.6
Q9H2U2	Q9H2U2	IPYR2_HUMAN	PPA2	17657.9	18788.3	25437.6	22377.6	17826.7	19982.1	30383.8	36107.5
P11388	P11388	TOP2A_HUMAN	TOP2A	17654.3	18889.3	44585.4	45169.8	9353.64	9948.23	12861.3	11439.9	16477.8	16577.4
Q9NZI8	Q9NZI8	IF2B1_HUMAN	IGF2BP1	17625	16849.8	17855.4	17184	5342.39	5733.49	11389.3	10605.7	3559.24	4721.35
Q08188	Q08188	TGM3_HUMAN	TGM3	17598.4	18805.7	11502.2	7848.55	7045.77	7276.64	31180.9	36349.2
P36969	P36969	GPX4_HUMAN	GPX4	17568.3	19354.1	22200.9	21407.9	19506.2	18830.6	13880.7	14250.7	12974.3	16177.5
P27986	P27986	P85A_HUMAN	PIK3R1	17552.4	17370.3	14266.1	16632.7	20190.5	19974.7	16388.8	17094.8	21672	21999.6
P50851	P50851	LRBA_HUMAN	LRBA	17545.5	17305	15779.1	18357.9	18701.4	17086.7	13300.8	12010.6	16181.6	16513.4
P28906	P28906	CD34_HUMAN	CD34	17525.7	20062.4			24154.8	21171.6	37264	13377.8	6954.43	6252.87
Q6VY07	Q6VY07	PACS1_HUMAN	PACS1	17513	16983.9	5854.2	6252.53	10451.9	11361	9210.56	7416.09	6304.45	7776.73
O75223	O75223	GGCT_HUMAN	GGCT	17512.3	18630.2	26298.3	9621.18	7173.36	3778.95	39835.7	46553.2	3093.39	1593.45
P15498	P15498;Q9UKW4	VAV_HUMAN	VAV1	17509.1	15037	8670.89	11165.6	19143.3	17769.4	16155.7	17097.1	15801.4	17068.9
P14859;Q9UKI9	P14859;Q9UKI9	PO2F1_HUMAN;PO2F3_HUMAN	POU2F1;POU2F3	17503.1	17076.8	1695.2	3438.75	15781.1	9306.44	17307.6	18468.9
P17844	P17844	DDX5_HUMAN	DDX5	17497	16843.5	63879.2	60444.9	9528.21	11138.5	33161.1	29065.8	16090.2	17492.5
Q96KG7	Q96KG7	MEG10_HUMAN	MEGF10	17496.6	18183.1	2524.86	1232.19	22535.1	16258.1	4416.38	3686.1	8962.17	11555.1
Q14141	Q14141	SEPT6_HUMAN	SEPTIN6	17475.8	19685	15674.5	16916.5	18652	18445.2	14202.4	16364.4	25494.9	22384
Q9NR19	Q9NR19	ACSA_HUMAN	ACSS2	17475.3	17020.4	15960	18152.6	17595.5	13449.5	19015.8	19784.4	24657.2	24458
Q8IUX7	Q8IUX7	AEBP1_HUMAN	AEBP1	17467.2	11266.8	4926.56	3638.22	14344.4	13396.9	5723.96	8980.84
Q9UKK3	Q9UKK3	PARP4_HUMAN	PARP4	17443.6	17774.5	5027.27	5282.92	8307.56	10288.9	9681.89	10470.8	26012.3	24473.3
Q9P273	Q9P273	TEN3_HUMAN	TENM3	17443.1	17710.7	3427.39	4171.09	6241.12	6180.86	8467.63	8424.15	5691.88	6340.47
Q8N474	Q8N474	SFRP1_HUMAN	SFRP1	17441.3	15943			4542.35	6511.08	1621.19	1172.32	11006.4	10093.7
Q12841	Q12841	FSTL1_HUMAN	FSTL1	17428.8	18789.1	5949.52	6425.19	38162.5	37241.4	11551.5	12972.4	20764.3	22757.8
P48444	P48444	COPD_HUMAN	ARCN1	17421.6	17693.4	23538	24666.2	19763.9	19944.1	20511.8	18446.5	18316.8	21099.6
Q9Y224	Q9Y224	RTRAF_HUMAN	RTRAF	17421.4	17523.1	30239.8	31676	13828.5	10999.6	13645.4	18149.3	25188.4	22701.4
P55290	P55290	CAD13_HUMAN	CDH13	17416.6	18621.7	9887.1	11444.6	20338.4	20340.7	13588.5	15299.6	21810.7	18158.2
Q8NFP9	Q8NFP9	NBEA_HUMAN	NBEA	17405.8	16929.3	10020.2	10527.2	18079	20003.8	14321.6	14513.8	15616.3	17000.6
P62995	P62995	TRA2B_HUMAN	TRA2B	17402.2	16714.9	10893.1	10884.6	13675.8	10523.5	12026.4	11915.7	9248.85	8335.26
Q05707	Q05707	COEA1_HUMAN	COL14A1	17389.9	16684.9	10423.8	9860.74	23457.5	23718.2	13183.3	13050.6	16429.8	12504.4
P07902	P07902	GALT_HUMAN	GALT	17366	18044.4	10464	9162.92	17474.6	13429.9	19416	15000.8	5582.8	5560.37
Q07866	Q07866;Q9H0B6	KLC1_HUMAN	KLC1	17361.8	17103.2	22490.7	23020.4	20336.5	18972.6	15969.2	15224.8	24279.9	25249.5
P18433	P18433	PTPRA_HUMAN	PTPRA	17345.1	17248.6	15170	15841.9	11129.7	11466.9	21558.3	20751.2	9838.84	10864.2
Q8N1N4	Q8N1N4	K2C78_HUMAN	KRT78	17305.1	24029.6	16003	16002.1	16748.5	7761.07	66829.7	85563.8
Q93100	Q93100	KPBB_HUMAN	PHKB	17303.2	19425.2	10166.9	11284.4	20114.6	20538	14725.3	14537.2	17036.8	18380.9
Q9NY33	Q9NY33	DPP3_HUMAN	DPP3	17302.9	14728.6	12165.6	13123.4	13418.5	12648.5	13708.1	14347	10624.9	12215.4
Q6B0K9	Q6B0K9	HBM_HUMAN	HBM	17302.6	8548.4			19224.6	21412.2	10034.2	6824.98
Q13443	Q13443	ADAM9_HUMAN	ADAM9	17302.5	17697.7	7232.15	8058.56	7545.15	8214.03	5797.45	6796.85	12602.6	15242.8
P28838	P28838	AMPL_HUMAN	LAP3	17279.9	18408.7	19838.4	18912.2	18941	20402.9	17932.2	17340.2	10292.2	12566.4
P24928	P24928	RPB1_HUMAN	POLR2A	17278.1	17270.7	35316.8	38096	9232.57	9266.14	15630.8	16306.4	19624.1	17388.8
B0I1T2	B0I1T2	MYO1G_HUMAN	MYO1G	17277.6	15132.6	6970.79	8918.56	15395.9	12543.8	16390.2	14353.8	11933.5	12507.2
P11233	P11233	RALA_HUMAN	RALA	17270.1	14399.8	36052.8	34242.4	9564.53	11376.1	27343	25293.1	12009.3	11901
Q9Y5K6	Q9Y5K6	CD2AP_HUMAN	CD2AP	17262.1	16770.1	13055.2	11608.2	9146.52	9370.24	15511.9	14213.7	12469.1	12210.4
O75821	O75821	EIF3G_HUMAN	EIF3G	17251.4	15942.4	15448.3	16413.2	10886	11284.6	12161.1	11264.6	10668.5	10194.5
P46734	P46734	MP2K3_HUMAN	MAP2K3	17239.4	18721.2	16618.4	16414.6	17256.7	17007.4	15910.6	16492.1	21399.3	19646.7
Q14761	Q14761	PTCA_HUMAN	PTPRCAP	17229.4	17839.2	11081.5	6584.12	8124.45	8159.34	31065.3	27117.9	11765.5	12745.4
Q13263	Q13263	TIF1B_HUMAN	TRIM28	17196.9	15540.1	113850	117046	9792.53	9461.1	30762.4	29387.8	23782.9	22924.9
Q9Y6E0	Q9Y6E0	STK24_HUMAN	STK24	17193.2	21774.9	11774.1	12005.1	10146.8	12037	12525.8	12074.5	10425.9	10081
Q9H1B7	Q9H1B7	I2BPL_HUMAN	IRF2BPL	17156.9	22173.5	8689.84	7712.16	51854.8	46360.1	9036.88	6419.4	67640.6	162686
P31323	P31323	KAP3_HUMAN	PRKAR2B	17151.8	16762.9	10831	10593.2	15526.9	16548.9	13959.5	13734.2	10909.5	14522.9
O00567	O00567	NOP56_HUMAN	NOP56	17139.8	19084.6	36184.9	36300.1	9173.65	9468.54	14725.9	16101.5	18196.7	19527.3
P12268	P12268	IMDH2_HUMAN	IMPDH2	17133.6	18804.5	21742.3	23967	19387.4	19019.4	18356.3	21818	23285.8	28078.6
P25685	P25685	DNJB1_HUMAN	DNAJB1	17129.8	13908.9	25478.7	25340.5	11940.3	11877.8	31739.8	32485	10836.4	13136.5
Q8WUW1	Q8WUW1	BRK1_HUMAN	BRK1	17126.2	17394.1	14016	16569.5	17553.5	17234	10230.8	16694.4	8482.56	12514.8
P61960	P61960	UFM1_HUMAN	UFM1	17115	18887	18956.8	17403.7	17901.5	18570.3	21331.1	14104.3	16985.8	17526.2
Q05193	Q05193	DYN1_HUMAN	DNM1	17107	19180	11773.5	12152.4	15669	15570.6	12273.7	11532.3	12358.2	13404.3
P10644	P10644	KAP0_HUMAN	PRKAR1A	17093.5	14595.3	12425.6	13067.6	19409.2	17115.4	17649.2	18463.7	23050.3	20431.8
Q07507	Q07507	DERM_HUMAN	DPT	17078.7	18687.5	10197.7	15883.5	16882.5	18210.4	17482.7	24910.6
Q5GLZ8	Q5GLZ8	HERC4_HUMAN	HERC4	17053.1	17159.3	9834.49	10306.3	15078.3	17312.5	13256.5	12726.8	20671.7	24034.6
P20645	P20645	MPRD_HUMAN	M6PR	17020.8	14888.4	33313	33876.3	7348.12	8910.78	21087.6	19567	10914.6	15675.4
Q02790	Q02790	FKBP4_HUMAN	FKBP4	17010.4	17499.5	36843.2	37025.1	23188.8	24139.5	24121.1	23446.5	13036.3	12035.1
Q92520	Q92520	FAM3C_HUMAN	FAM3C	17005.8	16569.7	19982	26210.7	19576	17888.9	14762.5	14142.8	13167.5	18060
Q9Y3D6	Q9Y3D6	FIS1_HUMAN	FIS1	17003.4	11941	10080.2	7112.61	15099.4	17559.1	12965.2	12740.5	7628.51	8730.3
Q8WUA4	Q8WUA4	TF3C2_HUMAN	GTF3C2	16996.3	21938.7	25480.2	25339.5	10869.2	7426.43	14610.9	15824	14751.7	15534.4
P15529	P15529	MCP_HUMAN	CD46	16994.6	17248.8	21964.4	25165	5352.51	2915.58	19331.7	20290.7	61789.5	59922.1
P09497	P09497	CLCB_HUMAN	CLTB	16991	15584.3	29937.2	34402.8	9977.35	8729.2	47808.2	48414.4	40642.1	50564
O60502	O60502	OGA_HUMAN	OGA	16975.4	15569.4	20416.9	21538.4	15362.7	12537.8	22781.6	21266.8	25376.3	23296.2
Q14515	Q14515	SPRL1_HUMAN	SPARCL1	16967.9	16603.6	3825.62	4490.31	21453.2	20164.4	12185.6	12010	20870.8	7406.54
Q562E7	Q562E7	WDR81_HUMAN	WDR81	16945.9	18313.6	8669.18	9136.48	20536.3	20477.1	13422.6	14409.7	17152.1	14176
P13591	P13591	NCAM1_HUMAN	NCAM1	16913.6	16477.4	12453.8	11345.2	20051.6	21354.3	12666.5	11578	16084.7	15212.8
Q9H270	Q9H270	VPS11_HUMAN	VPS11	16906.9	14564.5	13786.8	15902.1	14745	18290.9	12997.3	13857	13411.2	16185.2
P35080	P35080	PROF2_HUMAN	PFN2	16894.3	18759.7	14964.5	16748.6	10681.8	11498.6	15109.1	16227.5	18291.3	17877.1
Q6PD62	Q6PD62	CTR9_HUMAN	CTR9	16890.1	13287.4	24536.1	24272.7	15137.9	19111.6	15792.2	18329.9	19606.4	18897.4
P78552	P78552	I13R1_HUMAN	IL13RA1	16808.2	15731.6	8072.02	9384.9	3843.71	4676.18	20662.4	20392.2	1928.15	2120.27
Q8IZL8	Q8IZL8	PELP1_HUMAN	PELP1	16806.6	17469.3	8011.52	7690.28	3774.62	7184.27	5202.4	5822.26	29037.9	29160.9
Q6UWP2	Q6UWP2	DHR11_HUMAN	DHRS11	16805.9	17249.3	8339.45	8881.02	13576.9	14600.5	10281.2	12190	14164.5	12521
P55287	P55287	CAD11_HUMAN	CDH11	16804.9	16203.9	3744.47	3815.96	17649.3	17676.5	7383.79	6929.61	10867.6	12031.1
P45973	P45973	CBX5_HUMAN	CBX5	16786.9	19268.2	7550.91	7314.69	9991.86	10398	6781.3	6358.18	4614.65	4493.54
O60841	O60841	IF2P_HUMAN	EIF5B	16780.9	16946.6	16777.6	18283.2	20160.3	19191.5	15518.6	15405.3	11805.4	12319.4
O75976	O75976	CBPD_HUMAN	CPD	16778.3	16265	8903.79	10496.7	14022.2	13493.4	20247.3	19761	11638.2	11436.1
Q8NE71	Q8NE71	ABCF1_HUMAN	ABCF1	16753.4	17539.6	26101.9	25043.1	13129.3	11182	24475.9	19644.6	15012.8	17314.2
O95841	O95841	ANGL1_HUMAN	ANGPTL1	16744.9	21041.1	18714.4	19275.4					28272.3	30107.8
P07108	P07108	ACBP_HUMAN	DBI	16738.1	16452.7	19556.6	17714.5	11143.5	13152.5	34758.7	34612	10816.2	19096.7
P06280	P06280	AGAL_HUMAN	GLA	16729.9	16486.6	5822.52	5830.88	4974.5	3514.9	10358.3	9465.04	9303.09	8219.61
O15355	O15355	PPM1G_HUMAN	PPM1G	16721.4	17699.9	26088.3	27387.2	13759.7	9741.44	18728.5	19151.9	8603.94	7564.2
Q96P48	Q96P48	ARAP1_HUMAN	ARAP1	16719.6	17189.1	15494.4	15117.2	14274	16809.6	21529	18367.8	12976.1	3530.38
Q8TER0	Q8TER0	SNED1_HUMAN	SNED1	16716.3	16817.4	9060.57	8097.93	16154.8	18356.7	10679.9	12478.4	18152.7	19173.9
Q9UN37	Q9UN37	VPS4A_HUMAN	VPS4A	16702.8	19405.3	22392.5	25473.4	10244.8	9585.09	22653.4	21446.5	10131.5	8925.13
P25391	P25391	LAMA1_HUMAN	LAMA1	16689.3	9087.76	8068.67	3587.22	13578.3	12090.8	61388.6	65817.4	10186.9	15041.5
Q9BV38	Q9BV38	WDR18_HUMAN	WDR18	16675.3	16642.7	7857.89	8828.94	4512.22	4633.64	5866.23	6271.06	21699.9	19403.6
Q14108	Q14108	SCRB2_HUMAN	SCARB2	16672.6	13834.4	11600.4	10804.8	11424.8	13843.8	93656.3	116094	12236.8	10859.8
P09104	P09104	ENOG_HUMAN	ENO2	16670.8	14564.9	31086.3	31989	7900.52	19528
Q96L92	Q96L92	SNX27_HUMAN	SNX27	16653.5	15467.4	13147.4	13790.4	15130.2	13670.4	19583	20613.9	18695.7	21654.3
Q9HCC8	Q9HCC8	GDPD2_HUMAN	GDPD2	16633.2	16563.4	8317.6	9462.1	11755	14506.8	18784.1	20247.9	4636.76	16422.6
P43353	P43353	AL3B1_HUMAN	ALDH3B1	16595.5	16403.2	1559.88	1290.5	1976.03	1541.9	4172.27	4205.83	5762.85	3226.86
P00751	P00751	CFAB_HUMAN	CFB	16546.1	14747.5	2863.07	3050.59	16400.5	12671.7	13267.6	16479.8	6546.02	7413.56
P09936	P09936	UCHL1_HUMAN	UCHL1	16542.4	15467.4			3181.35	3009.99
P0C7P3	P0C7P3	SLN14_HUMAN	SLFN14	16512.2	20402.7	12113.6	13997.5	25967.5	23671.7	13485.3	14992.5	12213.6	9208.23
P63220	P63220	RS21_HUMAN	RPS21	16501.3	16238.8	20344.8	24751	8401.93	10365	15946.1	13308.8	10105.4	7745.77
Q6ZQQ6	Q6ZQQ6	WDR87_HUMAN	WDR87	16497.7	18037.1	5228.64	5805.73			11528.9	11747.2
Q13619	Q13619	CUL4A_HUMAN	CUL4A	16495.3	17207.3	21484	24513.8	18786.1	17375.3	16364.2	17602.7	18722.4	19691.9
P55795	P55795	HNRH2_HUMAN	HNRNPH2	16493.7	12778	30118.3	21158.4	11727.7	10864.4	16543.1	13999.5	10648	9278.55
Q8N2S1	Q8N2S1	LTBP4_HUMAN	LTBP4	16485.7	16589.1	5635.77	6687.56	21664.4	19922.6	10303.1	9816.42	12759.8	12354.5
Q9NRX4	Q9NRX4	PHP14_HUMAN	PHPT1	16471	15865.7	15188.2	15609.5	18030.2	12902.5	9776.32	8576.35	11216.9	8687.67
Q9BVJ7	Q9BVJ7	DUS23_HUMAN	DUSP23	16411.7	15721.8	8232.92	9133.82	15834.5	14745	14617.8	14569	17150.6	15231.5
Q96SW2	Q96SW2	CRBN_HUMAN	CRBN	16385.8	18538	15956.7	14599.8	18014.1	16529.1	18463.4	16892.3
P61513	P61513;A6NKH3	RL37A_HUMAN	RPL37A	16383	16192.4	19136.1	15528.2	15224.6	15334.8	14047.2	15062.8	11064.3	11345.3
Q14997	Q14997	PSME4_HUMAN	PSME4	16363.1	18008.5	29676.7	34449.8	20520.2	22844	17558.4	18069.4	19821	19184.2
P57737	P57737	CORO7_HUMAN	CORO7	16359.2	18366.4	16704.8	16672.5	20220.8	19288.1	18391.5	22161	12970.1	13631.4
P42357	P42357	HUTH_HUMAN	HAL	16355.9	16660.9	16854.4	16964.9	34351.7	32673	28847.5	31041.1	39063.8	36756.9
Q8TAT6	Q8TAT6	NPL4_HUMAN	NPLOC4	16352	17446	14740	15647.8	14948.5	16182.3	16484	16315.8	24912.1	23994.1
Q9Y397	Q9Y397	ZDHC9_HUMAN	ZDHHC9	16352	10044.2	10362.7	9485.34			9455.66	6241.94
P43487	P43487	RANG_HUMAN	RANBP1	16348.4	15860.2	31328.8	30538.7	21836	22367.3	32500.6	33533.1	11977.2	13799.7
P22087	P22087	FBRL_HUMAN	FBL	16331	16826	42375.1	43391.5	11497.6	10217.9	15321	15092.4	16424.3	16213.5
P54619	P54619;Q9UGJ0	AAKG1_HUMAN	PRKAG1	16279.4	14899.7	17222.2	18250.9	15615.9	16403.2	15011.4	16564	12857.6	13597.4
Q9BUL8	Q9BUL8	PDC10_HUMAN	PDCD10	16265.6	17581.5	18748.9	18596.3	12135.2	12290.5	35000.9	38453.5	10511.6	10928.1
P10586	P10586	PTPRF_HUMAN	PTPRF	16261.6	16477.4	6939.89	6460.61	12272.7	11685.6	32662.8	32090.9	8829.05	8396.7
P05198	P05198	IF2A_HUMAN	EIF2S1	16259.6	17508.8	27072.2	28423.3	18254.2	15565.1	19040.8	17973.6	21182	25234.6
P51857	P51857	AK1D1_HUMAN	AKR1D1	16235.5	14965	5730.81	6515.94	13604.4	12174.7	11049.8	8856.25	20864.3	20336.8
Q9NPF0	Q9NPF0	CD320_HUMAN	CD320	16234.7	12764.5	9229.99	11780	4483.54	4058.61	33769.2	38133.6	12846.7	23567.3
Q2M389	Q2M389	WASC4_HUMAN	WASHC4	16219.2	16247.7	11677.4	11797.1	17622.5	16247.2	13356.2	13040	14525.5	15567.2
P80303	P80303	NUCB2_HUMAN	NUCB2	16201.6	16124.3	8373.24	7564.91	9262.75	12337.5	17869.4	15532.3	11768.2	12333.8
Q9Y5C1	Q9Y5C1	ANGL3_HUMAN	ANGPTL3	16183.6	16284.1	5702.45	8000.82	22520.6	22697.7	10223.2	13719.5	5733.83	6473.54
Q9UGT4	Q9UGT4	SUSD2_HUMAN	SUSD2	16179	14278.6
Q9Y371	Q9Y371	SHLB1_HUMAN	SH3GLB1	16174.9	18349.8	9111.26	9914.66	19628	16661.1	14887.4	14607.2	13653.2	16199
Q6ZS30	Q6ZS30	NBEL1_HUMAN	NBEAL1	16125.2	14137.7	9941.58	10600.8	16373.5	16051	11485.1	11341	18429.8	18807.9
Q01081	Q01081	U2AF1_HUMAN	U2AF1	16122.8	14195.6	24649.1	25079.5	7034.01	8575.84	13367.7	13134.8	11853.4	10204.2
P61923	P61923	COPZ1_HUMAN	COPZ1	16119.4	16230.2	24168.5	24877.8	17110.1	19498.3	22789.8	23458.5	16888.1	14898.5
Q96AE4	Q96AE4	FUBP1_HUMAN	FUBP1	16106.1	13183.1	21004.2	19358.2	12764.9	13643	17296.8	16210.5	6068.65	6985.4
Q5H9R7	Q5H9R7	PP6R3_HUMAN	PPP6R3	16102.2	18179.1	13135.5	14519.2	21819.8	18516.2	10571.1	10730.5	12936.3	12877.2
P19022	P19022	CADH2_HUMAN	CDH2	16084.5	13453.1	2293.08	2868.58	18418.4	18713.4	8386.53	8612.07	13319.2	13565.7
Q8N8S7	Q8N8S7	ENAH_HUMAN	ENAH	16062.8	13985.4	9545.85	10040	17594.6	15990.9	19263	19138.8	10306.7	10137.3
P16591	P07332;P16591	FER_HUMAN	FER	16041	15613.3	9512.84	11041	16332.7	14662	13426.9	13393.3	17239.9	15847.1
Q15173	Q15173	2A5B_HUMAN	PPP2R5B	16028	17482.4	12247.3	11118.4	21133.9	21524.1			21864.3	14060.4
Q9ULT8	Q9ULT8	HECD1_HUMAN	HECTD1	15985.4	15872.9	13654.6	13623	16319.3	15736.2	16016.3	14643.2	20292.3	20657.1
Q7L1S5	Q7L1S5	CHST9_HUMAN	CHST9	15957.7	14892.5	32192.2	35843.7			18008.8	16764.8
Q96M27	Q96M27	PRRC1_HUMAN	PRRC1	15953.1	16574.3	12463.7	12279.5	18048.4	18026.5	14535.6	11018.9	18124.2	18541.6
O15118	O15118	NPC1_HUMAN	NPC1	15943.3	15953.1	11824.2	10940.3	11865.3	11130.5	68008.9	70934.1	5439.95	5558.76
P51151	P51151	RAB9A_HUMAN	RAB9A	15936.6	19785.5	15433.2	17170.8	18289.8	21109.2	103604	105326	17151.3	20226.1
P06454	P06454	PTMA_HUMAN	PTMA	15929.1	12568.6	19798	18403.1	13616.8	12885.5	21609.9	20192.1	6271.25	5160.65
O00471	O00471	EXOC5_HUMAN	EXOC5	15917.6	16971	11803.2	14179.1	18170	17862.3	10866.7	11272	14012.3	14083.4
P13797	P13797	PLST_HUMAN	PLS3	15893.2	14942.3	9223.45	9028.63	14793.8	15314.8	21473.9	21717.9	10800.3	10667.3
P04180	P04180	LCAT_HUMAN	LCAT	15890.2	10701.2	13431.6	15244.2	25816.8	28916.1	10844	18853.3	12570.5	8727.08
P36915	P36915	GNL1_HUMAN	GNL1	15880.7	17803.2	11561.1	12094	12452.9	12788.4	12493.2	12835.2	12823.1	11580.9
P55011	P55011	S12A2_HUMAN	SLC12A2	15879.1	16507.8	11339.9	12883.7	2086.29	2468.53	6912.29	7738.16	6673.19	5398.52
Q7Z406	Q7Z406	MYH14_HUMAN	MYH14	15859.5	16604	22287.7	16737.4	35432.5	34889.4	8330.47	12160	14441.3	13835.7
Q86VN1	Q86VN1	VPS36_HUMAN	VPS36	15853.8	19140.4	12654.7	13230.8	13553.1	14746.4	18186.4	18147.4	19526.8	20437.3
O14976	O14976	GAK_HUMAN	GAK	15835.2	14531.4	19433.1	20671.4	15116.6	17464.3	30242.2	29122.7	12501.4	12436.2
Q13043	Q13043	STK4_HUMAN	STK4	15831.2	16446	16256.7	17209.4	14952.6	15934.6	14822.2	16033.6	14543.9	12802.5
O95163	O95163	ELP1_HUMAN	ELP1	15829.7	15138.1	31373.6	33270.7	16153.1	16417.2	19706	21100.4	24429.2	24546.1
P12107	P12107	COBA1_HUMAN	COL11A1	15814.5	18132.7	5280.88	4460.43	13431	12722.2	12546.8	11971	13531.3	13078
Q9Y5P4	Q9Y5P4	CERT_HUMAN	CERT1	15806.9	15402.4	6728.18	7836.73	13310.6	12912.1	8694.51	10151.6	9807.38	9267.45
O00186	O00186	STXB3_HUMAN	STXBP3	15803.8	17268.5	19929.4	21237.1	9990.03	10353.7	24177.9	23572.9	9031.46	8655.03
Q9NRV9	Q9NRV9	HEBP1_HUMAN	HEBP1	15758.6	17978.3	10613.5	10945.4	24030	24424.9	17081.5	14674.3	18847.6	17510.8
Q8IUR7	Q8IUR7	ARMC8_HUMAN	ARMC8	15720.6	16582.4	15195.5	16848	17075.5	17921.2	16762	16329.9	12941.5	15912.8
Q9Y4X5	Q9Y4X5	ARI1_HUMAN	ARIH1	15715.3	14985.9	6830.93	6067.15	8124.08	9624.93	9793.54	9552.4	9654.95	4534.29
O15438	O15438	MRP3_HUMAN	ABCC3	15714.8	14923.8	2290.54	2194.45			2537.42	3718.56	3071.25	3250.79
Q9BS18	Q9BS18	APC13_HUMAN	ANAPC13	15636.2	13254	10344.9	11946.6	4990.8	5469.54	5005.35	4833.61
P51965	P51965;Q969T4;Q96LR5	UB2E1_HUMAN	UBE2E1	15633	15188	6185.98	7439.07	16381.5	14795.4	8987.84	10613	8132.62	7679.14
Q9BQS7	Q9BQS7	HEPH_HUMAN	HEPH	15609.8	14027.7	7019.56	8626.22	13350.1	17029.6	8242.37	8418.49	14137.1	16735.7
P17900	P17900	SAP3_HUMAN	GM2A	15581.4	12814.9	73193.1	4492.75	6205.85	4921.41	14846.3	18197.9	3724.72	5989.39
Q6GTS8	Q6GTS8	P20D1_HUMAN	PM20D1	15573	12811.1	9275.59	9600.65	16980.2	11268.4	11384.1	13906.7
P62495	P62495	ERF1_HUMAN	ETF1	15546.7	16752.7	14675	11481.9	15145.9	14628	13613.2	12484	18387.5	20687.2
P29323	P29323	EPHB2_HUMAN	EPHB2	15512.3	15826.2	7778.93	9125.72	7201.41	6463.22	4775.14	5201.31	5822.94	5423.1
Q99733	Q99733	NP1L4_HUMAN	NAP1L4	15507.2	15057.6	27316.6	26398.6	18683.5	19490.5	22916	20139.2	21849.5	19075.5
Q92888	Q92888	ARHG1_HUMAN	ARHGEF1	15495.7	16146.8	16788.2	16162.1	15246	11559.1	17015.1	13774.7	18554.2	19946.7
P54578	P54578	UBP14_HUMAN	USP14	15494.2	14527.1	17884.5	19577.8	14780.8	13305.7	16866.3	15669.1	18146.6	16679.6
O95967	O95967	FBLN4_HUMAN	EFEMP2	15485	15262.8	7387.47	8330.54	17575.7	15606.6	9447	11012.1	15564.1	14611.7
Q01973	Q01973	ROR1_HUMAN	ROR1	15464.7	14378.8	3350.99	2993.35	4818.76	4577.11	7521.69	7434.11	14796.5	10971
Q9ULC4	Q9ULC4;A0A3B3IRV3	MCTS1_HUMAN	MCTS1	15451.9	13713.3	15669.1	17078.2	12264.1	10904.1	17027.8	15674.7	10654.5	10601.2
Q92187	Q92187	SIA8D_HUMAN	ST8SIA4	15448.3	16745.1	6649.04	6824.15	17674.7	19167	13164.7	12120.1	14255.1	15790.6
O43681	O43681	GET3_HUMAN	GET3	15447.4	15977.9	18954	20925.4	17621.8	17966.4	22833.7	21807.8	24373.1	22973.7
Q5ZPR3	Q5ZPR3	CD276_HUMAN	CD276	15443.4	17878.1	13531.5	14515	15394.3	16099.9	25062.5	29653.5	11283.3	9172.69
Q5UE93	Q5UE93	PI3R6_HUMAN	PIK3R6	15421.7	11186	4255.19	6509.96	15404	13562.8	9712.27	11914.9	4767.11	6252.42
Q13098	Q13098	CSN1_HUMAN	GPS1	15408.7	15589.7	15934.3	16576.2	15677.8	14491.3	14905.5	14987.7	16843.7	15838.5
O43182	O43182	RHG06_HUMAN	ARHGAP6	15408.5	14181.1	7192.81	6661.28	17420.9	16693.8	12249.5	11823.5	7917.93	7742
P11279	P11279	LAMP1_HUMAN	LAMP1	15375.9	14272.1	14003.5	15448.6	14952.2	14445.8	320712	466814
P30520	P30520	PURA2_HUMAN	ADSS2	15373.3	14513.8	15179.6	16030.1	13440.3	14801.5	19333.6	17873.6	13657	12635
Q92824	Q92824	PCSK5_HUMAN	PCSK5	15368.6	15772.6	24415.4	24192.3	10490.9	10584.4	9784.28	7164.69	17580.7	16854
Q7LGC8	Q7LGC8	CHST3_HUMAN	CHST3	15368	14965.5	3670.94	4172.9	15050.6	14272.2	8303.8	8391.52	11955.3	9880.93
Q06187	Q06187	BTK_HUMAN	BTK	15331.1	15312.1	10246.9	10849.4	15501.4	15705	13981.3	13474	18503.4	17340.3
Q15477	Q15477	SKIV2_HUMAN	SKIV2L	15317.5	13961.5	16604.6	17294.7	14153.8	14107	14668.3	13531.7	15091.1	14143.5
P12955	P12955	PEPD_HUMAN	PEPD	15309.6	13015.2	12010.1	11605.3	20811.5	21747.4	12024.1	13757.6	7394.85	9956.19
P10124	P10124	SRGN_HUMAN	SRGN	15287.4	12880.5			124855	135582	1394.26	1928.42
P29508	P29508	SPB3_HUMAN	SERPINB3	15277.5	16430.6	51082.7	7682.22	10417.3	6932.24	19610.3	21969.8
Q9H2D6	Q9H2D6	TARA_HUMAN	TRIOBP	15249.7	14924.4	8079.49	7794.22	15085.4	16377.7	13227.8	11539.4	10840.5	10553.2
Q08AM6	Q08AM6	VAC14_HUMAN	VAC14	15242.7	16838.7	10377.1	11500.3	15712.7	16512.8	12999.5	14145.1	12499.3	11595.9
Q8N335	Q8N335	GPD1L_HUMAN	GPD1L	15228.5	13923.4	12168.2	11595.9	13657	13259	16370	20086.8	8596.82	7995.15
Q13617	Q13617	CUL2_HUMAN	CUL2	15193.6	13395.8	18634.2	18015.7	15538.9	15560.7	12531.1	12980.7	10736.8	14633.5
O14745	O14745	NHRF1_HUMAN	SLC9A3R1	15187.5	12495.7	16724.9	19038.6	9916.89	8977.68	36507.4	36895	6845.33	6339.22
Q9UHA4	Q9UHA4	LTOR3_HUMAN	LAMTOR3	15171.2	17408.4	18459.8	17030.7	15110.3	11578.8	51146.3	48293.6	8889.05	7748.39
P29279	P29279	CCN2_HUMAN	CCN2	15169	17378.9	6600.38	6674.6	56498.4	52448.2	8172.34	9701.41	19163.1	17017.2
A5YKK6	A5YKK6	CNOT1_HUMAN	CNOT1	15167.2	14849.4	16950.1	17446.4	13614.6	12658.7	15558.5	13950.4	15557.5	15452.5
Q8IZ52	Q8IZ52	CHSS2_HUMAN	CHPF	15159.7	12651.4	8756.37	9431.15	13086.5	13067.5	9278.58	8262.29	6026.77	12082.7
Q92783	Q92783	STAM1_HUMAN	STAM	15142	17243.4	12220.1	11816.2	11041.1	10260.3	19294.8	15381.4	11558.3	12714.4
Q8NDH2	Q8NDH2	CC168_HUMAN	CCDC168	15140.3	12890.2	3848.65	5771.47	13303.2	12441.3	13341	8770.04	19880.8	38635.8
Q9Y3A3	Q9Y3A3	PHOCN_HUMAN	MOB4	15117.2	19414.9	18881.5	21840.4	23181.3	17977.5	15947.9	16903.8	18564	20107.3
Q9Y281	Q9Y281	COF2_HUMAN	CFL2	15116.5	13023.3	5004.42	5943.77	8384.37	9203.23	15325.8	12379	6490.51	7016.71
O15127	O15127	SCAM2_HUMAN	SCAMP2	15091.8	14590.4	9322.48	13819.2	12410.4	10970.3	19786.3	16789.7	15597.1	15482.4
Q9GZS3	Q9GZS3	WDR61_HUMAN	WDR61	15082.1	13673.6	18610	19957.6	11855.1	12391.7	19302.1	17275.8	13383	15031.8
P62899	P62899	RL31_HUMAN	RPL31	15063	17105.2	10663.1	13865.5	24004.4	21863.7	15054.3	18479.8	12494.6	15570.9
Q5VWQ8	Q5VWQ8	DAB2P_HUMAN	DAB2IP	15061.3	17858	7337.61	9225.76	8378.53	12203	8879.38	8043.61
Q96BN8	Q96BN8	OTUL_HUMAN	OTULIN	15033.1	13201.7	14464.4	13559.3	12578.4	12819	13105.1	12781.5	11994	12139.8
Q01995	Q01995	TAGL_HUMAN	TAGLN	15014.9	15818.7	5829.14	5987.6	28443.8	24262	14362.2	14128.8	9993.8	10276.1
Q8IUL8	Q8IUL8	CILP2_HUMAN	CILP2	15011.8	16786.7	11615.6	12613.8	18348.8	19472.4	8983.63	9436.9	13620	11744.1
Q9UBG0	Q9UBG0	MRC2_HUMAN	MRC2	14982.5	12967.5	4033.02	4465.69	14804.7	13715.4	8823.2	8203.98	13440.1	13268.6
O00308	O00308;Q9H0M0	WWP2_HUMAN	WWP2	14965.9	18122.5	14865.9	14767.7	13497.3	17055.2	25574.3	26919.4	21278.7	22899.5
Q15751	Q15751	HERC1_HUMAN	HERC1	14934.5	15603	8789.07	9923.6	15147	14692.3	11544.1	12027.1	13769.2	13504.8
Q9BV19	Q9BV19	CA050_HUMAN	C1orf50	14928	13725	4512.69	6476.18	6661.54	7030.78	9560.94	9727.88	7910.73	7360.51
P08708	P08708	RS17_HUMAN	RPS17	14926.7	15409.7	22829.7	21226.8	18086.6	19888	19762	17146.7	31247.9	30717
Q15113	Q15113	PCOC1_HUMAN	PCOLCE	14908.3	12987.8	9303.01	11214.3	13927.6	13649.8	17294.2	15638.8
Q32P44	Q32P44	EMAL3_HUMAN	EML3	14905.8	15711.3	8385.37	8113.16	16064	17875.3	9977.97	13049.3	13260.5	14007.6
Q13884	Q13884	SNTB1_HUMAN	SNTB1	14893.5	19734.4	17487.4	19664.2	15370.3	15654	17511.2	17966.5	16017.4	16163.9
Q07812	Q07812	BAX_HUMAN	BAX	14860.8	13823.9	10201.1	10062.3	11395.4	10230.9	10023.8	11653.4	7033	5338.39
Q92900	Q92900	RENT1_HUMAN	UPF1	14858.5	14882.3	26541.9	27925.3	15926.9	16112.4	16549.8	17198.9	25619.6	27660.7
O60784	O60784	TOM1_HUMAN	TOM1	14843.6	15969.7	8514.1	8014.53	12025.3	12929.8	12218.2	11276.2	12184.7	10803.7
P20701	P20701	ITAL_HUMAN	ITGAL	14843	14854.9	9461.88	9439.96	7380.45	7167.82	30157	26539.5	9682.09	9069.62
P16050	P16050	LOX15_HUMAN	ALOX15	14831.1	13055.8	7427.73	10796.1	24247.3	27727.4	14346.2	8641.13	5415.35	11935.9
O60645	O60645	EXOC3_HUMAN	EXOC3	14826.5	13838.1	12799.8	13374.5	17049.9	17558.2	14311.5	15008.8	10558.8	14706.1
P55735	P55735	SEC13_HUMAN	SEC13	14819.2	16380.1	13571.8	16984.3	16193.7	12001.9	47643.8	40434.2	16498.5	22447.6
P14151	P14151	LYAM1_HUMAN	SELL	14816.7	16303.7	8352.28	9460.76	16371.8	11022.6	14858.6	18436.6	16059.9	15874.1
Q05655	Q05655	KPCD_HUMAN	PRKCD	14812.5	13653	12364.1	12628	12582.6	13151.3	16117.5	16073	12592.2	12492.6
Q14315	Q14315	FLNC_HUMAN	FLNC	14798.1	14143	8514.04	8860.43	22760.1	20585.1	12593.6	11636.7	17130	17640.7
P46783	P46783;Q9NQ39	RS10_HUMAN	RPS10	14787.9	14433.4	25952	27622.6	16189.8	16075.8	15684.5	16885.9	16776.1	21643.1
P46939	P46939	UTRN_HUMAN	UTRN	14773.6	17308.5	10019.2	10756.1	13526.4	13564.6	17647.4	17023.2	10881.8	12223.4
Q9Y3A5	Q9Y3A5	SBDS_HUMAN	SBDS	14769.4	15961.8	20407.8	20869.8	14771.3	14208.6	15609	17142.2	9939.24	13357.2
Q15084	Q15084	PDIA6_HUMAN	PDIA6	14763.7	11500.9	14527.6	13827	12907.1	12592.3	14554.4	11967.4	26473.2	25120.8
P25205	P25205	MCM3_HUMAN	MCM3	14745.5	12951.9	42475.4	43361.8	12436.6	11262.8	16690.2	17344.6	23086.6	24636.3
P49815	P49815	TSC2_HUMAN	TSC2	14723.5	17878	10778.2	10584.9	20591.9	19881.8	12245.9	15900	19998.4	16709.7
Q5TDH0	Q5TDH0	DDI2_HUMAN	DDI2	14717.3	12754.7	11561.4	11744.2	12262.3	11137.7	13761.9	12600.2	11688.3	11326.9
Q8IVS8	Q8IVS8	GLCTK_HUMAN	GLYCTK	14711.3	15589.8	4697.6	6965.26	10731.7	13456.3	11630.9	12687.6
Q9NQX3	Q9NQX3	GEPH_HUMAN	GPHN	14707.9	13719.2	9623.81	9599.99	11963	13323.2	14454.9	14546.1	10380.6	11080.7
Q5VYK3	Q5VYK3	ECM29_HUMAN	ECPAS	14690	15421.1	28677.3	29436.2	15909.1	14547.1	27182.8	26518.7	22037.9	22329.5
Q96AC1	Q96AC1;Q9BQL6	FERM2_HUMAN	FERMT2	14686.9	14304.1	7792.65	7852.11	14432.5	15426.2	17061.6	15355.3	11633.8	11411.3
P68431;P84243;Q16695;Q71DI3	P68431;P84243;Q16695;Q71DI3	H31T_HUMAN;H31_HUMAN;H32_HUMAN;H33_HUMAN	H3-3B;H3-4;H3C12;H3C13	14680.6	8677.51	56916.8	22366.4			15216.9	9626.1	36445.4	13786.1
O14974	O14974	MYPT1_HUMAN	PPP1R12A	14668.9	13276.3	6589.36	6621.05	10908.6	11139.5	9511.8	9256.97	8027.09	9179.37
Q9BVA1	Q9BVA1	TBB2B_HUMAN	TUBB2B	14668.8	15185.7	59785.6	74803.4	16820.1	15889.4	9260.9	12407.7
Q13131	Q13131	AAPK1_HUMAN	PRKAA1	14666.6	14090.5	14903.6	15732	11755.5	11716.9	15422.2	13778	14737.5	18894.5
Q3MHD2	Q3MHD2	LSM12_HUMAN	LSM12	14645.2	12809.8	9448.19	11036.7	5829.19	7173.83	12136	11848.9	4908.44	9248.44
Q16204	Q16204	CCDC6_HUMAN	CCDC6	14640.9	15777.5	10993.3	9596.33	10868.1	10365.5	14347.5	13277.3	9618.8	7456.03
Q8NES3	Q8NES3	LFNG_HUMAN	LFNG	14626.3	15762.1	8618.67	10956.9	13771.1	14750.6	11183.8	14372.8	10176.6	8625.7
P48507	P48507	GSH0_HUMAN	GCLM	14626	14526.8	10731.7	10711.6	10148.9	11356.3	12179.4	11906.5	13536.4	13230.1
P50151	P50151	GBG10_HUMAN	GNG10	14625.6	16355.3	20337.6	18711.3	9048.39	8260.66	21321.6	22945.3	4515.18	7242.25
Q86X27	Q86X27	RGPS2_HUMAN	RALGPS2	14622.7	14213.4	8165.92	9214.69	11140.2	9963.18	11928	11728.5	11328.8	9780.06
P51114	P51114	FXR1_HUMAN	FXR1	14620.3	13750.9	22274.7	24408.9	12135.8	12600.2	15909.1	15445	19961.1	18985.9
Q9BZG1	Q9BZG1	RAB34_HUMAN	RAB34	14598.3	13272.4	4001.89	3771.64	6440.96	7391.08	22132.4	23555.3	11953.5	13342.8
Q9NZT1	Q9NZT1	CALL5_HUMAN	CALML5	14593.4	13427	51329.5	6999.16	14300.9	4660.54	15321.7	15736.1
Q9Y6I3	Q9Y6I3	EPN1_HUMAN	EPN1	14588.2	13504.9	6518.72	6935.81	6943.65	8303.67	11583.9	10192.6	7551.38	7955.5
Q9BXP5	Q9BXP5	SRRT_HUMAN	SRRT	14587.5	16021.6	28975.5	27393.2	9000.86	10188.7	12966	13212.2	13005.6	11020.6
Q9Y2V2	Q9Y2V2	CHSP1_HUMAN	CARHSP1	14581.8	13749.1	14090.3	11029.1	17891.7	20453.7	17699.3	16356.4	6586.42	6064.24
P10915	P10915	HPLN1_HUMAN	HAPLN1	14578	13523.6	8146.22	9746.81	19126.4	19038.1	9066.49	9435.71	7782.72	8687.13
Q14165	Q14165	MLEC_HUMAN	MLEC	14561.5	10742.9	8468.14	7898.55	26183.7	18171.5	13955.1	10232.5	22515.1	19731.4
O43143	O43143	DHX15_HUMAN	DHX15	14561.5	14188.4	48192.9	49531	10144.4	10152.3	23276.4	22848.6	18183.9	17553.1
P49407	P49407	ARRB1_HUMAN	ARRB1	14532.7	15745.8	11245.2	10547.4	14508.2	14026.8	13144.6	14026.6	19145	15090.4
Q96KP1	Q96KP1	EXOC2_HUMAN	EXOC2	14521.6	13905.4	13990.1	13988.4	16338.1	15610.5	12184.3	12225.5	18000	16798
Q6UN15	Q6UN15	FIP1_HUMAN	FIP1L1	14492.7	14278.7	11985.2	12022	8365.46	7208.31	11655.6	12342.3	11142.8	11372
Q16512	Q16512	PKN1_HUMAN	PKN1	14491.6	12207.6	10720	12190.7	13006.5	13321.9	14174.4	12094.9	19267.6	14669.4
Q6IAA8	Q6IAA8	LTOR1_HUMAN	LAMTOR1	14457	14990	15749.6	14491.7	11537.5	11793.9	40468.2	44429.2	6988.65	7474.88
P02545	P02545	LMNA_HUMAN	LMNA	14431.8	14977.6	73086.9	38742.2	13677.8	11714.9	18938.2	19049.5	15239.2	14603.3
P63208	P63208	SKP1_HUMAN	SKP1	14430.4	14321.8	15192	16713.9	12791.6	11461.7	13146.9	14078.2	12264.1	12978.6
Q92696	Q92696	PGTA_HUMAN	RABGGTA	14429.5	13653.4	12210	12687.3	12411.3	15083.9	12841.5	11258.7	11784.9	11991.2
Q9GZQ3	Q9GZQ3	COMD5_HUMAN	COMMD5	14427.3	20350.7	5827.58	6701.99	50715.4	45039.1	7892.3	9460.04
P11215	P11215	ITAM_HUMAN	ITGAM	14422.6	17628.8	6585.88	7203.74	13680.6	11782.2	20154.1	21452.8
Q9H3U1	Q9H3U1	UN45A_HUMAN	UNC45A	14420.7	15114.4	14671.2	14920.5	16715.8	15969	16652.6	17699.9	15291.7	14687.1
P20042	P20042	IF2B_HUMAN	EIF2S2	14418.1	13730.2	36355.9	36283.6	14698.2	17160.1	18699	15487.7	21509.9	22821.9
Q9NTJ4	Q9NTJ4	MA2C1_HUMAN	MAN2C1	14395.9	12799.7	6712.24	7590.77	16292.1	17461.6	9496.35	8460.74	7057.69	7734.27
Q8WWY7	Q8WWY7	WFD12_HUMAN	WFDC12	14374	13446.3	8208.1	5383.83	3972.86	3495.75	14679.1	25258.4
Q9NZL9	Q9NZL9	MAT2B_HUMAN	MAT2B	14298.8	14421.9	9444.13	13068.3	15224.9	18717.7	12834.6	13125.3
Q9UIK4	Q9UIK4	DAPK2_HUMAN	DAPK2	14295.9	14574	9126.16	10363.5	15737.4	13695.8	12607.8	9378.18	15088.5	15016.7
Q8IWJ2	Q8IWJ2	GCC2_HUMAN	GCC2	14288.8	19075.9	10794	14634.1	15768.2	12371.4	26650.1	41188.3
Q9Y4W2	Q9Y4W2	LAS1L_HUMAN	LAS1L	14255.3	14258.2	7504.63	8600.73	7685.25	7334.85	5788.14	4705.11	22468.8	22453.2
P41091	P41091;Q2VIR3	IF2G_HUMAN	EIF2S3	14252.1	15447.6	27322.2	30792.4	13805.2	11569.5	18623.4	19487.4	19189.8	20876.1
P14678;P63162	P14678;P63162	RSMB_HUMAN;RSMN_HUMAN	SNRPB;SNRPN	14240.3	12168.9	14497.8	17016	9271.52	7714.1	7823.72	9273	3167.81	5060.83
Q16787	Q16787	LAMA3_HUMAN	LAMA3	14235.2	13317.1	35379.2	34698.3	17172.8	14588.5	19769	19713.5	250571	253230
Q9HB40	Q9HB40	RISC_HUMAN	SCPEP1	14222	14633.8	8923.75	4492.11	3004.72	2983.22	16419.8	13894.4	8595.49	7373.18
Q96P44	Q96P44	COLA1_HUMAN	COL21A1	14220.2	12037.3	4102.67	3915.08	9459.94	12897.6	9486.17	10197.4	11472.5	3598.18
Q01082	Q01082	SPTB2_HUMAN	SPTBN1	14214.4	14413.9	25231.5	24639.4	12318.4	11928	15722.3	14850.8	11643.9	11587.2
Q9P2L0	Q9P2L0	WDR35_HUMAN	WDR35	14213.1	14164.6	9571.25	9599.96	16162.6	16928	11526.5	13875.3
Q8WWM7	Q8WWM7	ATX2L_HUMAN	ATXN2L	14166.3	13015.7	11177	10419.8	10072.5	9761.76	9808.7	10253.4	11280.8	11885.9
Q9Y4B5	Q9Y4B5	MTCL1_HUMAN	MTCL1	14146.8	14275.9	6940.58	7485.15	16962.7	20449.3	9456.76	10802.8	10470.4	12373.8
Q12933	Q12933	TRAF2_HUMAN	TRAF2	14127.3	10513.7	11295.1	12751.1	12705	9915.51	18854.3	17234.8	12551.6	13282.6
Q9UG63	Q9UG63	ABCF2_HUMAN	ABCF2	14125.1	13997.5	24123.9	20738.1	10817.6	10817.5	18697.3	18250.4	14638.5	15848.9
O60262	O60262	GBG7_HUMAN	GNG7	14124.3	13542.7	4629.67	4427.24	5195.61	6305.79	13367.7	10089.3	7146.65	6827.92
O75534	O75534	CSDE1_HUMAN	CSDE1	14108.2	11662.3	18610.9	20448.5	13745.2	12173.8	20596	18681.5	20575.8	19440.7
P08236	P08236	BGLR_HUMAN	GUSB	14104.9	13599.6	5409.34	5780.79	12727.9	12882.1	7926.85	10206.3	12370.2	11770.5
Q6UXN9	Q6UXN9	WDR82_HUMAN	WDR82	14091.9	13106.9	19369.7	21320.4	11375.5	11474	14286.5	13993.6	12057.3	14132.8
Q9NR56	Q5VZF2;Q9NR56	MBNL1_HUMAN	MBNL1	14091.3	14889.6	6584.66	6451.6	16168.8	13232.5	10979.8	10354.7	10242.5	16838.8
Q9Y6E2	Q9Y6E2	5MP1_HUMAN	BZW2	14051.5	13444.7	14310.3	14907.2	9768.66	9936.26	9829.12	11769.7	11082.1	10908.8
P01011	P01011	AACT_HUMAN	SERPINA3	14043.2	15683.7	5537.37	3633.1	29289.1	63518.8	8681.08	14950.8	16881	17516.2
P10398	P04049;P10398;P15056	ARAF_HUMAN	ARAF	14037.1	14352.6	13631.1	13967.2	15336.6	15468.5	12434.3	12759.8	12517.3	11229
P35249	P35249	RFC4_HUMAN	RFC4	14029	11432.8	24575.8	24425.9	9767.55	8730.86	10702.1	10618.2	14471.7	15271.2
Q13564	Q13564	ULA1_HUMAN	NAE1	14018.9	13240.5	17826.6	18335.8	14703.8	16096.9	16612.2	16581.9	19890.8	23339.8
Q10471	Q10471	GALT2_HUMAN	GALNT2	13988.5	12792.3	6707.89	7693.48	12014.1	12305.8	11718.8	12139	17764.2	18423.1
Q9ULL4	Q9ULL4	PLXB3_HUMAN	PLXNB3	13921.6	17678.3	10546.4	12767.2	10776.8	9809.04	17553.4	16985.3	5704.75	15605.4
Q8TBQ9	Q8TBQ9	KISHA_HUMAN	TMEM167A	13914.4	15778.2	8075.18	9166.26	11461	10695.8	15609.1	17189.1	8810.87	8763.37
P09972	P09972	ALDOC_HUMAN	ALDOC	13905.4	12190.7	11730	11915.9	13350.1	13067.5	14411.5	12493.5	11521.5	11288
Q9Y3C5	Q9Y3C5	RNF11_HUMAN	RNF11	13904.4	12793.5	5814.66	6739.38	14336.4	15476	15633	8545.59	11443.2	10304.5
Q9NZT2	Q9NZT2	OGFR_HUMAN	OGFR	13892.7	15263.1	16164.9	17736.3	11168.3	19076.5	9857.19	12206.1
Q96HC4	Q96HC4	PDLI5_HUMAN	PDLIM5	13892.4	15042.7	10467.7	11773.6	15667.6	15576.7	13053.2	13115.6	17670.8	17416.5
Q9Y285	Q9Y285	SYFA_HUMAN	FARSA	13885.8	16501.5	41175.6	47575.9	15039.1	13153.4	28043.2	24090	22291.5	21738
Q9H3S7	Q9H3S7	PTN23_HUMAN	PTPN23	13883.7	15543	18043.8	19148.5	15435.2	14836.9	25109.4	25278.7	20284.4	17482.6
P51991	P51991	ROA3_HUMAN	HNRNPA3	13879.6	14320.4	43703.3	38475.6	15365.5	12709.9	16508.9	15487.9	22586.2	18431.7
Q92599	Q92599	SEPT8_HUMAN	SEPTIN8	13875.4	15727.1	13195	14716.3	15774.7	15296.6	12853.4	12008.3	16225.2	14004.1
P15374	P15374	UCHL3_HUMAN	UCHL3	13859.4	14273	19447.2	19814.3	15531.1	14407.1	18035.6	15719	10546.4	14935.9
Q8NHP8	Q8NHP8	PLBL2_HUMAN	PLBD2	13859.1	12484.3	4032.58	4606.63	9293.44	10974.5	11447.5	11038.1	13417.6	3455.72
Q5VT25	Q5VT25	MRCKA_HUMAN	CDC42BPA	13855.2	14370.1	10788.1	11068.3	15287.5	14379.8	12544.6	10814.8	12578.8	13161
P07451	P07451	CAH3_HUMAN	CA3	13849.6	13649.3	4087.62	3216.85	26756.9	22954.2	9861.91	8738.84	13022	15467.6
P52630	P52630	STAT2_HUMAN	STAT2	13832.1	12118.8	6308.09	7105.99	17125.7	14771.8	7394.37	7585.5	14454.7	23542.1
O75436	O75436;Q4G0F5	VP26A_HUMAN	VPS26A	13827	15216.1	16517.8	17711.1	15287.6	15123.6	24971.9	28075.1	13131.3	15735.3
O15460	O15460	P4HA2_HUMAN	P4HA2	13782.3	14593.7	8884.33	9016.82	16396	15575.6	9359.34	10756.4	15422.5	18924.7
Q12846	Q12846	STX4_HUMAN	STX4	13779.2	13328.8	14728.4	16657.2	7394.51	6913.91	18379.3	15854.7	7161.34	7498.86
P51692	P42229;P51692	STA5B_HUMAN	STAT5B	13775.3	15043.7	8712.98	9148.65	15266.6	13280.8	12448.3	10971.8	10898.4	11646.7
O94804	O94804	STK10_HUMAN	STK10	13727.8	17485.5	12556.6	13170.9	12217.4	11225.1	16378.5	15312.9	13992.6	8821.81
A0A075B6H7;A0A0C4DH55;P01624	P01624;A0A075B6H7;A0A0C4DH55	KV315_HUMAN;KV37_HUMAN;KVD07_HUMAN	IGKV3-15;IGKV3-7;IGKV3D-7	13727.4	10145.8			14401.2	16257.9	7257.59	14421.2
Q8IWU5	Q8IWU5	SULF2_HUMAN	SULF2	13726.7	12855.9	32526.2	36760.8	4312.18	4090.83	2860.45	4437.39	14806	15354.3
P08069	P08069	IGF1R_HUMAN	IGF1R	13698.5	12845.7	9569.82	9179.46	8383.29	7770.04	17706.2	19163.4	6586.38	6630.86
P35749	P35749	MYH11_HUMAN	MYH11	13691.4	14402.5	6041.16	5762.18	19862.9	19950.5	17938.5	18060.3	15810.6	14929.7
Q9Y625	Q9Y625	GPC6_HUMAN	GPC6	13671.7	13140.5	16529.4	16306.2	10735.9	9833.08	7774.48	8242.4	16215.1	16440.5
Q13641	Q13641	TPBG_HUMAN	TPBG	13649.8	14731.4	8778.12	9350	3511.18	2156.74	5684.63	9563.88	16517.8	19163
P29122	P29122	PCSK6_HUMAN	PCSK6	13637.4	13592.2	9368.89	8797.99	15344.1	11283.3	16476.8	14128	21189.5	18271.4
O75936	O75936	BODG_HUMAN	BBOX1	13605.7	13351.1	9382.03	7758.83	14357.8	15542.7	12877.1	19747.1	9672.71	10758.5
P78344	P78344	IF4G2_HUMAN	EIF4G2	13600.7	14066.4	29581.5	31620.8	11370.9	11506.7	16049.9	17327.8	13913.4	11330.5
P54105	P54105	ICLN_HUMAN	CLNS1A	13591.1	18170.1	16103.1	16261.5	12130.1	8799.02	15807.1	12924.7	12341.1	10503
Q6ZRY4	Q6ZRY4	RBPS2_HUMAN	RBPMS2	13562.1	14896.6	5705.8	6391.99	16852.4	16226.5	12946.9	14335.4	15608.8	16343.2
A0AVT1	A0AVT1	UBA6_HUMAN	UBA6	13553.4	16201.3	20723.3	20479.2	15882.5	16333.2	14110.7	14142.4	13965.9	14567.1
P49862	P49862	KLK7_HUMAN	KLK7	13550.8	12850.4	7133.09	5333.54	4956.29	1313.04	22375	24890.2
Q9NY27	Q9NY27	PP4R2_HUMAN	PPP4R2	13535	11219.7	3422.04	5538.31	5758.77	9075.88	9141.98	6507.49
O95433	O95433	AHSA1_HUMAN	AHSA1	13527.3	12322.5	19172.1	18877.6	10906.5	10884.1	16766.3	16873.2	9219.79	9178.53
Q9NUU7	Q9NUU7;Q9UMR2	DD19A_HUMAN	DDX19A	13504.1	11873.9	14697.7	15850.8	12916.4	11861.2	15338.2	16430.8	11897.2	14113.8
Q92890	Q92890	UFD1_HUMAN	UFD1	13494.9	12501.3	12310.9	12348.7	11474.6	12375.8	18460.8	19522.3
Q13363	P56545;Q13363	CTBP1_HUMAN	CTBP1	13475.6	12596.2	10847.1	10432.8	14296.5	14572.7	11850.9	9856.23	11240	10954
Q9HD42	Q9HD42	CHM1A_HUMAN	CHMP1A	13472.3	15686.9	12364	8091.82	7016.45	3798.94	15272.1	11822.6	3251.6	4684.81
Q7L5N1	Q7L5N1	CSN6_HUMAN	COPS6	13460.3	13333.1	11097.2	12003.6	14219.8	12120	12213.1	11789.3	15760.6	16832.9
Q14517	Q14517	FAT1_HUMAN	FAT1	13448.5	14366.4	15864	16156.2	11939.1	9607.34	7367.95	8602.94	21001.5	20058.3
P55039	P55039	DRG2_HUMAN	DRG2	13434.7	14965.3	14183.3	16550.6	16081.5	16099.6	15143.8	16092.4	19017.6	20584.3
Q9NTN9	Q9NTN9	SEM4G_HUMAN	SEMA4G	13425.5	12875.3	5956.14	6360.92	20706.5	22738.3	8576.71	7168.5	12021.4	5014.64
Q9UHF1	Q9UHF1	EGFL7_HUMAN	EGFL7	13423.5	13107.3	2771.84	2690.34	3965.02	5004.64	8121.44	6718.09
Q92835	Q92835	SHIP1_HUMAN	INPP5D	13421	12850.9	11396.2	11528.5	12333.5	15568.2	11731.3	12505.1	10485.4	10916.2
O00622	O00622	CCN1_HUMAN	CCN1	13396.4	13414.7	11262.5	11986	66874.8	70019.6	22365	21487.9	18934.4	18625.3
Q6DKJ4	Q6DKJ4	NXN_HUMAN	NXN	13384.8	8805.26	15011.2	14167.1	12777.9	9783.03	15680.2	21995.4	13239.4	12041.6
Q07912	Q07912	ACK1_HUMAN	TNK2	13384.7	14621.1	6425.8	6945.89	11854.2	11269.1	15719.9	13286.9	8200.95	4688.15
Q6IA69	Q6IA69	NADE_HUMAN	NADSYN1	13373.2	12066	9240.32	7915.97	12173.3	13711.9	9568.69	12589.5	14355.3	15433.6
P12004	P12004	PCNA_HUMAN	PCNA	13372.3	14675.7	26274.1	31770	14619	15911.5	18140.5	20368.9	14670	14450.6
Q16222	Q16222	UAP1_HUMAN	UAP1	13369.3	14912.4	11592.7	12810.2	16193.1	14459.8	16753.8	16335.8	14999.6	17060.9
Q99828	Q99828	CIB1_HUMAN	CIB1	13357.1	13418	13798.9	12851.6	6382.28	6973	23956.2	21685.8	7584.59	8555.72
Q68CQ7	Q68CQ7	GL8D1_HUMAN	GLT8D1	13345.9	16017.5	6456.39	7721.69	12881.3	12417.4	10222.9	9562.32	13694.3	8242.67
Q92598	Q92598	HS105_HUMAN	HSPH1	13327.1	11700	49395.2	51437.1	9019.14	8254.63	22705.3	20951.6	14024.3	12543.7
Q14746	Q14746	COG2_HUMAN	COG2	13317.3	14495.4	12798.7	11600.9	12614.3	13153.5	9138.91	8757.6	11289.1	17482.6
Q9H4G0	Q9H4G0	E41L1_HUMAN	EPB41L1	13316.9	12536.8	13864.2	13128.4	2918.17	3741.72	13594.3	13379.6
P08779	P08779	K1C16_HUMAN	KRT16	13304.5	18177.7	71681.2	7228.88	19483.8	1952.91	28718.7	53063.9	8113.15	8833.69
P63167	P63167;Q96FJ2	DYL1_HUMAN	DYNLL1	13299.8	13471.5	16893.6	13913.1	10539.4	13420.7	17804.9	14994	19908.9	18124.3
P28907	P28907	CD38_HUMAN	CD38	13298	18363.4
Q9UNE7	Q9UNE7	CHIP_HUMAN	STUB1	13295.3	13061.6	13617.7	14641.5	11028.7	11016.6	22480.2	21318.4	15283.2	13353.2
P22059	P22059	OSBP1_HUMAN	OSBP	13284.4	11789.3	13739.9	14068.1	9026.02	8942.51	12706.6	11688	9156.67	8728.57
Q2M2I8	Q2M2I8	AAK1_HUMAN	AAK1	13280.9	14315.8	8371.8	8990.59	17583.2	16053.6	11699.5	12646.1	13998.3	14510.1
Q86X10	Q86X10	RLGPB_HUMAN	RALGAPB	13268.7	13195.3	9945.81	10670.6	12498.5	13817.5	11657.5	9944.93	13845	13232.6
Q969U7	Q969U7	PSMG2_HUMAN	PSMG2	13259.6	19997.3	19913.2	22735.6	13409.3	16143.8	18021.6	17747.3
Q9UNQ0	Q9UNQ0	ABCG2_HUMAN	ABCG2	13257.3	14424.9	2495.98	3292.65	7784.04	7686.21	51612.6	53342.8
Q93034	Q93034	CUL5_HUMAN	CUL5	13251.5	12953.3	12483	14081.5	11383.6	12943.6	11530.1	10891.1	11673.7	10886.8
Q96S97	Q96S97	MYADM_HUMAN	MYADM	13251.5	12737	6034.94	6497.18	3326.14	4979.22	5230.91	5782.86	5681.77	5027.58
P43403	P43403	ZAP70_HUMAN	ZAP70	13249.7	11953.3	20306.9	21335.4	11581.7	10609.5	11047.3	14762.7	13905.5	14356.1
Q9UNH7	Q9UNH7	SNX6_HUMAN	SNX6	13237.7	12869.6	9992.34	10222.3	14109.8	12880.4	10562.2	10493.7	16720.4	13119.4
P13693	P13693;Q56UQ5	TCTP_HUMAN	TPT1	13230.5	13105.5	17447	18165.8	15331.6	13270.3	14862.9	15265	21129.2	23431.8
Q13576	Q13576	IQGA2_HUMAN	IQGAP2	13227.6	15728.4	12685.6	13276.3	18831.8	17207.3	12738.4	12403.9	6456.67	10272.8
Q13464	Q13464	ROCK1_HUMAN	ROCK1	13200.9	13348.1	11301.7	11158.4	11750.9	11407.7	9883.68	9448.34	12395.8	11544
Q15293	Q15293	RCN1_HUMAN	RCN1	13197.1	12103.8	5405.96	7709.61	22714	18081.7	7182.41	8085.28	12510.9	13529.8
P13473	P13473	LAMP2_HUMAN	LAMP2	13180.6	16571.6	6044.76	6697.63	9429.92	10798.3	72510.9	96668.3	5320.29	6411.83
Q9NQ79	Q9NQ79	CRAC1_HUMAN	CRTAC1	13180.4	12507.9	6384.03	6576.68	12650.8	14188.4	11577.3	13271.9	21028.2	23329.5
P42785	P42785	PCP_HUMAN	PRCP	13174.6	12636.4	9233.89	7732.13	5143.03	5489.92	15740.7	16740.5	9552.07	6667.35
Q96C19	Q96C19	EFHD2_HUMAN	EFHD2	13154.4	13990.9	13602.9	15269.5	14765.2	15741.7	13958.3	14467.6	12905	15343.3
Q8IWA0	Q8IWA0	WDR75_HUMAN	WDR75	13148.5	13092.7	25845.7	29648.6			8785.38	11510.7	14297.7	10113.2
Q15181	Q15181	IPYR_HUMAN	PPA1	13146.2	12465.9	15390.2	14803.2	9177.44	9788.42	19533.1	21143.1	12287	13658.2
Q9Y4C2	Q9Y4C2	TCAF1_HUMAN	TCAF1	13141.5	13423.7	10882	11411.3	13595.9	14149.8	13603.3	13375	15651	16322.5
O60343	O60343	TBCD4_HUMAN	TBC1D4	13134.2	14116.8	12123.2	11635.7	15746.5	14671.1	12856.6	11740.8	10860.7	11114
Q13232	Q13232	NDK3_HUMAN	NME3	13133.8	12588.7	6831.94	7024.66	14066.9	16353.4	11373	12248.2	11348.7	12221.8
Q9H5X1	Q9H5X1	CIA2A_HUMAN	CIAO2A	13125.1	13484.5	8157.31	7179.46	10555.5	12942.3	12596.4	12514.3
P0CG39	Q6S8J3;Q9BYX7;P0CG38;P0CG39	POTEJ_HUMAN	POTEJ	13116.4	15770.2	8671.87	13277.2	20951.2	13633.1	10903.2	9385.29	16601.1	17716.8
O75494	O75494	SRS10_HUMAN	SRSF10	13100.5	13954.4	6959.15	7914.57	8989.85	9015.04	5384.33	7230.52	7710.29	8258.86
Q6V0I7	Q6V0I7	FAT4_HUMAN	FAT4	13094.6	13912.8	5838.67	5987.56	16293.4	16858.2	9280	8954.54	18214.1	19891.9
Q92974	Q92974	ARHG2_HUMAN	ARHGEF2	13094.5	16064	9673.46	10359.2	17080.5	16577.3	12955.8	13432.8	14502.6	17732
Q9C0C9	Q9C0C9	UBE2O_HUMAN	UBE2O	13068.6	14128.4	9114.56	8543.77	12307.8	13580.1	11080.9	10144.7	10921	10119.9
Q96P63	Q96P63	SPB12_HUMAN	SERPINB12	13066.2	18621.7	10579.3	7122.8	8510.98	2765.76	45235.7	50772.2
P06493	P06493	CDK1_HUMAN	CDK1	13049.3	11214.2	19560.9	20949.9	7322.44	9338.01	23014.5	20928.8	18868.6	19978.2
Q99471	Q99471	PFD5_HUMAN	PFDN5	13048.4	13017.4	18422	19486.9	9430.96	8982	17362.6	16303.3	9958.3	9025.93
P03952	P03952	KLKB1_HUMAN	KLKB1	13043	12721.3	4226.39	3948.75	19433.1	17464.2	10474.6	15600	9360.89	4738.9
P14866	P14866	HNRPL_HUMAN	HNRNPL	13033	13919.7	42212.3	43795.8	12542.2	11850.4	23415.9	21454.6	20608.1	15798.4
O75153	O75153	CLU_HUMAN	CLUH	13026.2	12261.7	28901.2	30452	11762.7	12207.5	18396.5	18242.5	19293	17053.7
P45877	P45877	PPIC_HUMAN	PPIC	13024.2	18177.9	4703.35	6336.66	16240.8	14251.5	11480.9	10065.3	16873.2	16766.4
Q9UKD2	Q9UKD2	MRT4_HUMAN	MRTO4	13024	12570	9504.43	9944.49	10116.1	10785	5646.01	5120.41	4242.4	2929.74
Q9NZI7	Q9NZI7	UBIP1_HUMAN	UBP1	13009.6	9816.88	12505.8	14637.6	12522.7	9886.28	13748.2	14618.4	13666.3	6935.71
Q9H307	Q9H307	PININ_HUMAN	PNN	12996	14790.1	10169	9506.75	6153.46	499.682	8032.63	9777.14	15491.7	10326.2
Q9UGJ1	Q9UGJ1	GCP4_HUMAN	TUBGCP4	12995.5	12529.2	17474	18864.5	12925.6	14025.7	13154.7	14327	12859.5	10860.7
Q96N67	Q96N67	DOCK7_HUMAN	DOCK7	12991.6	13152.8	15061.9	15431.1	13247.6	13090	12098.1	11486.3	14257.4	14555.5
O75711	O75711	SCRG1_HUMAN	SCRG1	12980	15007.2	3140.2	3940.86	23739.5	29429.1	10484.8	12084.9	17200.9	19955
P35221	P26232;P35221	CTNA1_HUMAN	CTNNA1	12978.3	11875.8	20267.3	19388.4	9005.02	9326.98	7914.15	7564.86	12405.8	12356.7
Q9NY15	Q9NY15	STAB1_HUMAN	STAB1	12976.4	11686.8	6233.27	5670.87	12497.1	13766.7	6456.77	6277.03	16161.8	10180.9
P08581	P08581	MET_HUMAN	MET	12968.5	12162.6	3307.51	3075.02	8514.64	9035.44	18639	18197.8	15877.3	13810
P41227	P41227;Q9BSU3	NAA10_HUMAN	NAA10	12961.6	12646.3	19990.2	19247.6	11827.9	10782.3	14077.8	13589.3	9125.15	11023.5
P08582	P08582	TRFM_HUMAN	MELTF	12956.1	13092.4	7842.18	7870.21	11545.1	12099.8	7857.5	7493.76	11606.9	11424.1
P55285	P55285	CADH6_HUMAN	CDH6	12949.6	12467.8	1286.5	1565.58	15517.6	12330.6	9620.8	6877.58	7957.6	9221.85
Q13283	Q13283	G3BP1_HUMAN	G3BP1	12938.1	13921.9	32438.1	31288.5	13894.4	12637.2	23189.9	22921.4	18201.8	17758.8
P23470	P23470	PTPRG_HUMAN	PTPRG	12931.2	13349.3	7981.12	8198.11	8861.76	7886.75	13745.8	13497.3	8618.7	9142.93
Q9NTM9	Q9NTM9	CUTC_HUMAN	CUTC	12926.2	10992.3	6543.54	7056.48	9516.1	13272.4	10991.2	9528.1	10660.1	13871.9
P98194	P98194	AT2C1_HUMAN	ATP2C1	12918.9	11668	6122.49	7143.32	10863	9695.86	17496	15920.1	8144.47	7936.4
Q13033	Q13033	STRN3_HUMAN	STRN3	12905.8	13512.9	13124.9	14313.5	13776.1	13621.6	13108.2	12563.4	15273.7	11376.4
Q14160	Q14160	SCRIB_HUMAN	SCRIB	12889.5	11845.6	15448.2	16477.6	6941.64	6210.45	26470.3	26893.3	11257.8	11219.5
P43243	P43243	MATR3_HUMAN	MATR3	12869.7	13603.5	20202.8	20853.9	9012.2	7894.85	8069.24	7829.21	16255.5	13506.8
Q9Y3E7	Q9Y3E7	CHMP3_HUMAN	CHMP3	12861.6	10852.1	17679.5	15058.6	8204.41	8222.62	13096.8	12503.8	6656.15	3138.37
Q9GZM7	Q9GZM7	TINAL_HUMAN	TINAGL1	12839.2	15695	92271.9	95080	206498	199038	71211	64925.4	186861	161478
Q02108	Q02108	GCYA1_HUMAN	GUCY1A1	12821.1	13482.1	7114.27	9033.82	15743.7	15723.4	10017.8	9498.17	15213.1	17017.4
Q9H267	Q9H267	VP33B_HUMAN	VPS33B	12818.8	12863.9	9034.52	9286.11	12006.3	11484.1	10361.2	9575.28	12865.3	10866.3
Q9H4A6	Q9H4A6	GOLP3_HUMAN	GOLPH3	12815.3	11982.4	11461	10428.5	9172.86	9648.86	14534.1	15377.8	9985.27	8639.8
P12821	P12821	ACE_HUMAN	ACE	12813.2	11186.9	4009.55	3903.03	10161.7	11437.4	8414.94	9469.72	5426.75	14069.3
P19087	P19087	GNAT2_HUMAN	GNAT2	12800.2	10939.6	3378.37	4336.69	12583.9	12747.3	6863.95	8404.96	8962.97	9927.5
Q66K74	Q66K74	MAP1S_HUMAN	MAP1S	12799.6	10878.8	14450.1	16129.5	11899	13812.8	9306.83	8267.82	11812.2	12709.6
Q9H8M9	Q9H8M9	EVA1A_HUMAN	EVA1A	12796	17930.5	6248.19	8750.75	6376.68	3715.18			42610.9	42827.6
Q16674	Q16674	MIA_HUMAN	MIA	12783.7	10970.3	12459	10318.1	9562.8	9252.83	9727.06	10436.2
O43291	O43291	SPIT2_HUMAN	SPINT2	12767.7	11038.2	11284.2	13155.3					9270.23	7275.47
P47897	P47897	SYQ_HUMAN	QARS1	12742.5	13146.6	46186.1	46348.4	12374.3	11811.8	21100.8	20263	20371.7	18983.2
P53805	P53805	RCAN1_HUMAN	RCAN1	12732	14111.4	4111.4	5000.04	11220	12395.2	8434.05	10559.3	11112.9	12363.2
P42356	P42356	PI4KA_HUMAN	PI4KA	12719.6	12869.1	9188.39	9852.32	12244.4	13013.4	13624.4	13122.1	11773.1	13558.7
P20337	P20337;Q96E17	RAB3B_HUMAN	RAB3B	12717.5	7597.03	3769.16	3941.73	8410.94	7970.94	10245.1	10278
Q9BYB0	Q9BYB0	SHAN3_HUMAN	SHANK3	12712.6	12907.7	7264.46	7482.22	9708.1	9537.66	16557.7	15720.3	9574.41	6733.36
Q9BVK6	Q9BVK6	TMED9_HUMAN	TMED9	12709.4	14830.7	12186	8313.95	6630.17	6514.67	15130.2	13024.2	43730.6	45596.2
O95816	O95816	BAG2_HUMAN	BAG2	12704.5	14731.8	27100	22462.8	5970.87	6873.72	33963.5	33316.3
P03973	P03973	SLPI_HUMAN	SLPI	12688.7	11024.7	3826.27	3713.07			16411.3	19820.9	62870.6	47068.5
Q9UIC8	Q9UIC8	LCMT1_HUMAN	LCMT1	12686.8	13654.2	10546.4	12611.8	12905.9	13288.5	12155.9	13829.7
P26599	P26599	PTBP1_HUMAN	PTBP1	12686	13649.9	21804.5	21443.8	8084.28	8859.33	15834.9	14817.8	13042.1	12693.1
O94923	O94923	GLCE_HUMAN	GLCE	12684.1	11586.9	10278.2	11354.7	10878.2	10535.8	8070.78	8302.73	12579.6	13301.3
Q8TAD7	Q8TAD7	OCC1_HUMAN	OCC1	12680.4	11239.9	14210.8	14137.5	9240.6	6463.75	1353.19	780.981	4524.44	4931.48
O14737	O14737	PDCD5_HUMAN	PDCD5	12652	11591	16156.5	18016.9	5523.39	8446.46	13682.8	13978	7451.24	4064.67
Q86T03	Q86T03	PP4P1_HUMAN	PIP4P1	12648.4	9798.17	8445.83	8774.72	5509.4	5217.17	43256.4	32912
Q99576	Q99576	T22D3_HUMAN	TSC22D3	12641.6	14307	4605.91	5103.49	11775.2	14018.2	8525.82	11527.9	8934.6	12866.5
O95747	O95747	OXSR1_HUMAN	OXSR1	12639.6	10839	14343.3	16219.1	12721.5	13477.3	12949.2	16113.4	11289.9	16450.3
Q13308	Q13308	PTK7_HUMAN	PTK7	12637.1	15960	25570.2	25189	18922.5	19112.9	10225.8	11883.2	15246.3	21000.1
P11172	P11172	UMPS_HUMAN	UMPS	12633.8	11726.5	31077.1	31504.6	10274.5	19946.3	21488.9	19532.8	11305.6	9819.86
P29692	P29692	EF1D_HUMAN	EEF1D	12631.2	12626.1	34689	34738.8	14355.3	15562.9	27741.8	27116.4	19631.6	18535.2
Q7Z3J2	Q7Z3J2	VP35L_HUMAN	VPS35L	12631.1	11528.9	8659.64	8556.35	14748.1	14850.1	7964.04	8379.86	8534.37	10624
P16615	P16615;Q93084	AT2A2_HUMAN	ATP2A2	12625.4	11124.2	6204.16	5355.11	11426.8	9417.75	9354.68	8718	27498.2	26192.3
O95081	O95081	AGFG2_HUMAN	AGFG2	12622.6	15650.2	6550.95	8380.8	8205.78	9499.63	11871.8	13214.1	6236.18	7441.46
Q12851	Q12851	M4K2_HUMAN	MAP4K2	12620.4	12869.8	8300.49	9218.05	12450.4	11273.7	10771.2	11172	15566.1	14057.4
Q00796	Q00796	DHSO_HUMAN	SORD	12617.6	14751.3	25245.1	22934.4	27570.3	24240.9	21940.2	18665.5	12900.5	11942.4
Q96DD7	Q96DD7	SHSA4_HUMAN	SHISA4	12604.4	9561.79			6740.2	6673.55			3632.46	3753.89
P27797	P27797	CALR_HUMAN	CALR	12603.2	13043.8	14763.6	6640.08	13130.8	12287.8	14810	12250.8	29892.8	29650.6
Q9UP83	Q9UP83	COG5_HUMAN	COG5	12601.9	12848.5	11660.2	13027.2	12873.9	12312.8	9863.96	10863.1	11977.1	11137.3
Q9UNA0	Q9UNA0	ATS5_HUMAN	ADAMTS5	12594.5	17623.6	4581.03	5775.55	15634.5	15100.1	10748.6	15110.6	30736.5	50830.1
Q7Z745	Q7Z745	MRO2B_HUMAN	MROH2B	12592.9	12244.7	4829.25	5957.97	14134.7	15464.3	8838.73	8307.91
Q7Z392	Q7Z392	TPC11_HUMAN	TRAPPC11	12541.7	13550.2	10102.1	11191.6	12916.4	12902.2	11703.3	12629.8	5875.41	7964.22
P56377	P56377	AP1S2_HUMAN	AP1S2	12537.1	16958.8	11651.7	9997.84	14663	12910.3	14392.4	13502.6	16488.3	9451.36
P51575	P51575	P2RX1_HUMAN	P2RX1	12517	10789.6	4331.15	6219.1	5917.55	8061.46	12109	13804.7	4186.73	5857.76
P13798	P13798	ACPH_HUMAN	APEH	12499.5	12668.2	14142.1	12604.1	11593.1	12073.2	14863.7	15039.8	8652.75	7864.87
P05067	P05067	A4_HUMAN	APP	12491.9	13203.3	41353.1	42440.2	21385.3	24430.5	10567.4	11048.9	18662.1	17552.7
Q9BY43	Q9BY43	CHM4A_HUMAN	CHMP4A	12446.2	10935.3	5706.22	4912.4	1953.22	1960.1	7103.9	6371.85	4281.09	3715.96
Q13976	Q13976	KGP1_HUMAN	PRKG1	12439.7	12640	8650.49	8197.45	12336.5	11520.7	10559	10727.3	14444.3	13566.5
Q9H6X2	P58335;Q9H6X2	ANTR1_HUMAN	ANTXR1	12434.2	13410.5	5260.9	5418.81	11866.8	13571.4	15043.1	15000.8	11687.5	16771.3
Q13509	Q13509	TBB3_HUMAN	TUBB3	12432.5	16665.4	25287.3	24140.8	7660.11	10636.9	10080	10120.8	6851.74	8633.03
Q13618	Q13618	CUL3_HUMAN	CUL3	12426.8	11473.6	14673.1	15290.5	9841.69	11121.4	13768.9	13908.4	9445.16	8560.59
P61758	P61758	PFD3_HUMAN	VBP1	12426.6	10575.4	15138	15685.6	12307.6	12455.4	14273.5	13321	7640.92	9477.33
P16157	P16157;Q12955	ANK1_HUMAN	ANK1	12422.7	12713.6	5834.27	5736.24	9229.03	9600.54	12440.4	11135.6	7898.81	7027.4
P16112	P16112	PGCA_HUMAN	ACAN	12380.9	13420.8	17783.9	20847.6	17427.4	15264.4	9497.05	9606.79	14374.2	11663.3
P52701	P52701	MSH6_HUMAN	MSH6	12378.7	11825.6	24254.2	28147.3	9202.17	9921.85	7398.06	7002.68	13718.1	12659.5
O14579	O14579	COPE_HUMAN	COPE	12374.1	13767.8	35608	33617.7	5668.7	8211.79	13065.7	15713.7	12036.8	12657.1
P55265	P55265	DSRAD_HUMAN	ADAR	12373.8	8551.19	16925.4	18369.1	9081.81	15463.6	12182.4	12639.2	10230.5	11409.5
O60684	O60684	IMA7_HUMAN	KPNA6	12366.8	11442.1	13679.5	16631	9986.15	8504.72	12919.3	14253.9	13570.4	11622
Q9Y2X7	Q9Y2X7	GIT1_HUMAN	GIT1	12366.7	13311.3	18167.8	17450.6	14427.5	13887	14015.9	13050.4	13069.2	13934.9
Q96H20	Q96H20	SNF8_HUMAN	SNF8	12366.3	11803.2	8899.03	9448.42	11281	14791.8	15028.8	13850.7	9598.08	11549.1
Q8WV41	Q8WV41	SNX33_HUMAN	SNX33	12358.1	10575.1	3889.77	2993.82			4685.99	4391.73	41713.7	38066.2
Q8N163	Q8N163	CCAR2_HUMAN	CCAR2	12357.7	11184.6	22535.3	22091.1	7464.32	6205.66	8296.86	7807.57	9587.69	8680.58
Q96NU7	Q96NU7	HUTI_HUMAN	AMDHD1	12354.9	12056.8	3936.85	4792.13	14199.7	13395.2	4775.72	3964.26	7405.2	6062.02
Q684P5	Q684P5	RPGP2_HUMAN	RAP1GAP2	12347.8	12685.5	6573.07	6769.58	13158.4	13677	8773.66	8413.15	10931.7	11357.8
O15511	O15511	ARPC5_HUMAN	ARPC5	12335.6	13556	13336.2	11093.6	5941.83	8962.69	12168.7	11143	9248.39	10882.1
P13646	P13646;P19012;Q99456	K1C13_HUMAN	KRT13	12319.7	42398.6	14557.6	12872.4			18849.3	34152.9	72657.5	11730.3
P08237	P08237	PFKAM_HUMAN	PFKM	12318.6	13029	22208.3	24535.7	14333.5	15038.4	24269.5	25344.1	18120.8	16802
P61326	P61326;Q96A72	MGN_HUMAN	MAGOH	12305.6	12372.2	14695.9	12952.5	10991.5	6934.46	10488.1	8253.02	14452.7	16502.5
A6NIL9	A6NIL9	CRAS1_HUMAN	CRYM-AS1	12293.9	8221.82	3505.81	3723.21	9243.76	5451.28	3654.69	5656.25
Q8NBJ4	Q8NBJ4	GOLM1_HUMAN	GOLM1	12291.9	12805.7	6076.94	6633.42	19188	24309.7	9566.94	10503.5	6582.72	6595.78
P58546	P58546	MTPN_HUMAN	MTPN	12289.7	11563.3	12611.1	11158.9	12266.5	12738.7	8412.12	10988.6	13122.1	12739.9
Q9NS15	Q9NS15	LTBP3_HUMAN	LTBP3	12277.8	10508.2	8052.36	8222.74	5398.55	6024.91	3393.89	3832.73	3653.93	5029.48
Q15796	P84022;Q15796	SMAD2_HUMAN	SMAD2	12277.6	13088.5	8504.52	8594.46	7892.14	8880.87	10097.8	10507.2	11002.4	9351.22
Q8TCT1	Q8TCT1	PHOP1_HUMAN	PHOSPHO1	12275.6	11275	3309.65	3406.97	9274.7	10052.8	8121.65	10394.2	12400.1	11045.7
Q92692	Q92692	NECT2_HUMAN	NECTIN2	12273.2	15611.1	6622.88	8256.1	4198.98	4074.32	21182.3	24236	3122.03	3276.44
P30740	P30740	ILEU_HUMAN	SERPINB1	12260.4	12526.3	13836.1	14502.2	11635.1	24160.1	18049.6	20492.4
O60264	O60264;P28370	SMCA5_HUMAN	SMARCA5	12239.2	11219.8	33420.3	34047.4	8285.15	8701.09	11409.5	11826.1	15296.8	16910.2
P46108	P46108	CRK_HUMAN	CRK	12238.2	11174.5	9592.05	8844.15	6319.65	5851.18	12898.4	11468.6	3403.38	4036.35
Q1RN00	Q1RN00	YC018_HUMAN		12231.3	8739.84	7958.52	14594.9			9589.41	32120.8
Q86SJ2	Q86SJ2	AMGO2_HUMAN	AMIGO2	12229.5	13739							8222.67	10487.7
Q13492	Q13492	PICAL_HUMAN	PICALM	12229.3	11823.8	7784.09	7495.15	10161.4	10466.2	11734.8	12877.2	7330.99	7913.26
P16401	P16401	H15_HUMAN	H1-5	12216.5	11423.6	21691.4	16298.6	9949.98	13767.6	15551.3	19802.9	8135.57	17054.9
Q96AX1	Q96AX1	VP33A_HUMAN	VPS33A	12209	12989.2	11858	11621.4	11482.7	12573.2	11875.1	12944.2	11803.4	11116.7
Q9NVM1	Q9NVM1	EVA1B_HUMAN	EVA1B	12204.4	10358.8	5922.53	4698.02	7010.69	5816.12	5700.92	4123.66	16552.7	11465.8
Q96JD6	Q96JD6	AKCL2_HUMAN	AKR1E2	12197.4	12234.3	5439.15	4706.44	11880.8	11589.1	12784.2	13543	28873.9	33779.1
Q9UBR1	Q9UBR1	BUP1_HUMAN	UPB1	12174.4	14379.2	8661.55	5327.84	12555.2	12085.6	13836.4	12576.6
Q9HD67	Q9HD67	MYO10_HUMAN	MYO10	12171.8	10023.5	12911	13352.2	16469.2	10343.8	30107.1	30320.1	8418.21	7498.77
Q9H1B5	Q9H1B5	XYLT2_HUMAN	XYLT2	12148.9	12418.2	10500.5	10068.3	13133.5	12266.3	21579.6	20786.4	5585.38	7567.44
Q9NZN5	Q9NZN5	ARHGC_HUMAN	ARHGEF12	12105.8	11241.3	8858.99	9249.4	11547.9	13308.2	13206.6	12036.9	11930.4	11198.3
P80108	P80108	PHLD_HUMAN	GPLD1	12101.7	10742.8	6330.93	7303.27	14051.1	14251.1	12363.7	7774.1	13807.4	14223.7
Q00765	Q00765	REEP5_HUMAN	REEP5	12087.3	12068.7	8934.13	9247.16			10576.8	10784.8	16478.3	19480.6
Q05397	Q05397	FAK1_HUMAN	PTK2	12078.7	11300.6	7636.41	8856.76	10256.3	10428.6	11336.3	8968.33	7961.75	6318.9
O75695	O75695	XRP2_HUMAN	RP2	12073	13868	18299.8	22268.2	7712.83	9775.26	26026.3	27587.7	7756.82	8219.59
Q68DH5	Q68DH5	LMBD2_HUMAN	LMBRD2	12072.3	13312.5	4426.6	4803.08			26151.7	25137
P11137	P11137	MTAP2_HUMAN	MAP2	12071.5	13253.5	7019.74	5969.26	13782.6	12646.1	11996.3	13527.9	14278	14280.5
Q9UPY3	Q9UPY3	DICER_HUMAN	DICER1	12068.3	11231.3	10916.6	10843.4	10028.9	11264.9	10145.4	10458.3	7426.03	5923.69
Q9H5V8	Q9H5V8	CDCP1_HUMAN	CDCP1	12039.3	11607	28354.8	29781	3330.17	4944.89	1992.76	5964.84	18522.8	21457.1
A8MWD9;P62308	P62308;A8MWD9	RUXGL_HUMAN;RUXG_HUMAN	SNRPG;SNRPGP15	11968.8	11957.8	33655.5	31323.9	6661.82	5947.45	11813.5	10888.4	12026.5	9195.73
Q86W33	Q86W33	TPRA1_HUMAN	TPRA1	11965	10973.6	6803.77	6060.43	10812.6	8463.09	18131.5	15212.7	6509.65	7197.55
P47712	P47712	PA24A_HUMAN	PLA2G4A	11937.7	9951.42	6263.77	7633.64	10221.6	10917	10296.8	7432.9	13215	8708.98
Q6E0U4	Q6E0U4	DMKN_HUMAN	DMKN	11907.1	11777.9	5140.2	4478.82	14983	6889.65	14063.1	19054.8
P06753	P06753	TPM3_HUMAN	TPM3	11904.9	9500.31	21331.5	13391.3	16241.1	15345.9	14747.7	17750	11773.4	12024.4
Q9NYH9	Q9NYH9	UTP6_HUMAN	UTP6	11895.3	38544.9	16315.7	20686.3			15440.7	11985	28617.4	33590.4
Q9NR09	Q9NR09	BIRC6_HUMAN	BIRC6	11888.3	12274.1	10164.2	10997	13588.6	13408.7	11603.2	11285.7	11606	12483.9
Q5T6V5	Q5T6V5	QSPP_HUMAN	C9orf64	11882	11414.7	8690.7	9213.23	19159.6	17584.8	9021.15	10363.7	13069.2	14944.8
P43250	P43250	GRK6_HUMAN	GRK6	11871	11850.9	13052.6	13913.8	10779.6	10011.1	16601.9	13818.3	11497.1	11364.6
Q15057	Q15057	ACAP2_HUMAN	ACAP2	11853.7	11587.3	9824.58	10822.7	12251.6	13013.5	10136.3	11403.3	12849.3	14113
Q9HCL0	Q9HCL0	PCD18_HUMAN	PCDH18	11844.8	11734	3188.19	3455.61	12921.6	11356	9223.26	7988.54	12147.7	9179.51
Q92626	Q92626	PXDN_HUMAN	PXDN	11841.5	15881.6	11273.1	11105.4	175945	189876	52379.3	48442.6	136329	149256
Q16625	Q16625	OCLN_HUMAN	OCLN	11838.9	9919.43	9167.04	11247.8	5638.51	4167.01			6175.42	8906.3
Q13325	Q13325	IFIT5_HUMAN	IFIT5	11838.3	13129.3	8160.42	10618.2	12937.2	11363.1	8259.79	9585.75	15476.7	14326.8
O14657	O14657	TOR1B_HUMAN	TOR1B	11838.3	12732.3	6643.13	6840.04	5806.77	5807.75	8372.15	8103.32	6435	7643.2
Q15363	Q15363	TMED2_HUMAN	TMED2	11837.1	9856.15	10440.9	8387.2	6133.22	5916.91	5746.03	7369.77	21268.2	17821
O75689	O75689	ADAP1_HUMAN	ADAP1	11824.3	11578.9	6421.13	7065.01	14333.7	15342.3	10598.9	9607.19	12030.6	14758.8
Q9ULQ0	Q5VSL9;Q9ULQ0	STRP2_HUMAN	STRIP2	11818.1	10497.5	6318.04	6129.53	10976.9	10944.7	11170.8	9059.64	13528.8	12303.5
P01833	P01833	PIGR_HUMAN	PIGR	11814.5	11852	4426.39	3967.49			13070.5	14139.3
Q8TAG9	Q8TAG9	EXOC6_HUMAN	EXOC6	11810.9	10976.9	9608.85	10465.7	13628	14221.6	9655.72	10736.8	9984.89	10599.9
P28062	P28062	PSB8_HUMAN	PSMB8	11808.9	12088	5682.96	5476.56	12287.3	11918	12514.4	11480.9	5399.4	10712.4
O60826	O60826	CCD22_HUMAN	CCDC22	11804.4	13051.7	10071.3	11829.5	12130.7	12696	12198.1	11415.7	12724.3	11225.5
[truncated: 4,436 more rows]

## Sheet: human cancer cell lines common
Protein.Group	Protein.Ids	Protein.Names	Genes	EA549-1	EA549-2	Esw480-1	Esw480-2	Ehela-1	Ehela-2	EMCF-1	EMCF-2	EBEAS-1	EBEAS-2
Q3YBM2	Q3YBM2	T176B_HUMAN	TMEM176B	48232.3	43346.3	1057.63	1057.87	696650	881154
Q12931	Q12931	TRAP1_HUMAN	TRAP1	79477.7	66539.8	79467.5	79508.7	125313	112505
Q9H3U5	Q9H3U5	MFSD1_HUMAN	MFSD1	3441.29	2983.27	2784.32	2660.87	115620	111621
Q6ZUS5	Q6ZUS5	CC121_HUMAN	CCDC121	91084	89050.8	178466	180850	54267	40215.3
Q9HAV7	Q9HAV7	GRPE1_HUMAN	GRPEL1	38564.1	38121.7	60853.2	60361.5	49395.2	45881.1
Q9ULL8	Q13796;Q9ULL8	SHRM4_HUMAN	SHROOM4	37376.4	33292.5	29857.7	29774.6	45929	40765.7
Q13410	Q13410	BT1A1_HUMAN	BTN1A1	20317.8	20835.9	6997.43	6927.38	43477.5	47800.8
Q9NS93	Q9NS93	TM7S3_HUMAN	TM7SF3	3380.71	2636.71	2779.11	2656.04	42653.7	42517.9
Q9P2S5	Q9P2S5	WRP73_HUMAN	WRAP73	51232.8	44891.6	35546.5	35055	38707.4	50294
Q86VP1	Q86VP1	TAXB1_HUMAN	TAX1BP1	2398.05	6178.24	2003.18	1940.58	33657.2	34858.3
Q13835	Q13835	PKP1_HUMAN	PKP1	6225.08	7589.05	15670	15712.7	29712.7	65594.9
Q9H4L4	Q9H4L4	SENP3_HUMAN	SENP3	24510.6	21896.1	22137.4	21672.9	27774.8	13270.2
Q68DH5	Q68DH5	LMBD2_HUMAN	LMBRD2	12072.3	13312.5	4426.6	4277.67	26151.7	25137
Q9NRA2	Q9NRA2	S17A5_HUMAN	SLC17A5	2054.86	2827.48	1960.7	1890.73	25797.8	30666.6
Q13286	Q13286	CLN3_HUMAN	CLN3	2427.35	1291.72	1280.4	1272.38	19951.9	23841.8
Q9UNK0	Q9UNK0	STX8_HUMAN	STX8	7182.45	5973.47	8155.12	8097.05	18100	19347.4
Q7L1S5	Q7L1S5	CHST9_HUMAN	CHST9	15957.7	14892.5	32192.2	32242.9	18008.8	16764.8
Q9BXP2	Q9BXP2	S12A9_HUMAN	SLC12A9	1965.32	2403.7	4904.63	4792.13	17670.5	16895.6
O95166	O95166;Q9H0R8	GBRAP_HUMAN	GABARAP	2580.16	2192.04	2390.06	2318.29	17474.7	17127.7
Q15025	Q15025	TNIP1_HUMAN	TNIP1	8458.01	6865.11	3515.34	3409.43	17157.7	15260.9
P59665;P59666	P59665;P59666	DEF1_HUMAN;DEF3_HUMAN	DEFA1B;DEFA3	11479.5	9846.17	6651.25	6584.12	17085.3	24065.7
Q8IZP9	Q8IZP9	AGRG2_HUMAN	ADGRG2	7079.85	6557.8	4576.32	4448.71	16877.8	14636.6
P19440	A6NGU5;P19440	GGT1_HUMAN	GGT1	66526.3	62530.6	6248.27	6189.75	16794.3	14959.5
Q6NSJ0	Q6NSJ0	MYORG_HUMAN	MYORG	2249.16	2231.77	2736.44	2606.03	16666.6	14450.8
P14384	P14384	CBPM_HUMAN	CPM	7492.14	9863.04	2330.89	2284.23	16461.3	17584.9
P51798	P51798	CLCN7_HUMAN	CLCN7	2105.5	1887.1	2041.55	1975.15	16204	16347
P22079	P22079	PERL_HUMAN	LPO	5746.01	7143.56	1672.84	1649.15	16105	16034.5
P14207	P14207	FOLR2_HUMAN	FOLR2	9208.44	7002.79	1940.59	1874.35	16102.1	20625.9
P01772	P01762;P01763;P01767;P01772;P01780;A0A0B4J1V1;A0A0B4J1X5;A0A0C4DH42;A0A0J9YVY3;P0DP02;P0DOX2	HV333_HUMAN	IGHV3-33	22631	22362.2	5502.78	5408.19	15971.1	11046.8
O00115	O00115	DNS2A_HUMAN	DNASE2	6540.56	7048.61	6131.91	6070.08	15893.2	17549.8
Q92887	Q92887	MRP2_HUMAN	ABCC2	11243.1	12315.1	2085.75	2012.93	15622.9	12624.8
Q14210	Q14210	LY6D_HUMAN	LY6D	7687.82	10419	6826.1	6737.38	15250.8	22711.1
Q99541	Q99541	PLIN2_HUMAN	PLIN2	3952.41	3681.43	6772.41	6697.63	14782.1	11827.5
Q8N387	Q8N387	MUC15_HUMAN	MUC15	5853.57	4630.44	1732.88	1704.25	14362.4	10750.8
P01833	P01833	PIGR_HUMAN	PIGR	11814.5	11852	4426.39	4277.13	13070.5	14139.3
Q9Y337	Q9Y337	KLK5_HUMAN	KLK5	6453.67	7602.99	4252.43	4135.01	12874.9	15728.6
Q9Y5Y0	Q9Y5Y0	FLVC1_HUMAN	FLVCR1	4505.78	4158.2	4954.46	4837.35	12650.1	12555.1
Q86UN3	Q86UN3	R4RL2_HUMAN	RTN4RL2	2335.94	2850.48	1354.2	1379.46	12158.2	13403.9
P52569	P52569	CTR2_HUMAN	SLC7A2	5064.36	5626.85	4400.29	4241.45	11749.4	10766.8
P60880	P60880	SNP25_HUMAN	SNAP25	4661.94	7431.82	3475.73	3395.38	11595.3	15132
Q6ZQQ6	Q6ZQQ6	WDR87_HUMAN	WDR87	16497.7	18037.1	5228.64	5112.49	11528.9	11747.2
Q13277	Q13277	STX3_HUMAN	STX3	3334.85	3892.79	15805.7	15866.5	11398.8	10977
Q9NRM6	Q9NRM6	I17RB_HUMAN	IL17RB	21098.1	17877.7	11887.1	11784.9	11293.9	14453.1
P36222	P36222	CH3L1_HUMAN	CHI3L1	4587.64	5514.73	3111.42	3025.44	11106.6	10262.9
P29218	P29218	IMPA1_HUMAN	IMPA1	4030.46	2315.59	6911.53	6811.44	10855.2	10615.2
P26374	P26374	RAE2_HUMAN	CHML	5475.56	5150.6	17672.1	17691.5	10634.5	9737.47
Q14956	Q14956	GPNMB_HUMAN	GPNMB	4400.85	3531.63	9549.64	9489.99	10243.6	8603.29
O43688	O43688	PLPP2_HUMAN	PLPP2	7710.06	7865.26	2683.27	2561.62	9875.55	12960.3
Q9UKK9	Q9UKK9	NUDT5_HUMAN	NUDT5	2897.32	3348.73	7139.28	7056.61	9839.57	9172.97
Q15828	Q15828	CYTM_HUMAN	CST6	5812.75	5659.49	18457.5	18300.3	9786.07	9588.87
Q16790	Q16790	CAH9_HUMAN	CA9	1290.55	1009.33	4661.29	4513.87	9503.42	8446.69
Q9Y397	Q9Y397	ZDHC9_HUMAN	ZDHHC9	16352	10044.2	10362.7	10316.7	9455.66	6241.94
O60503	O60503	ADCY9_HUMAN	ADCY9	1381.39	2323.23	2196.94	2125.82	9185.8	8358.31
P27487	P27487	DPP4_HUMAN	DPP4	2685.08	3574.36	1202.78	1197.15	8936.38	7911.63
Q9UEU0	Q9UEU0	VTI1B_HUMAN	VTI1B	3197.39	2313.09	4294.64	4158.58	8761.46	8332.21
Q9UBP0	Q9UBP0	SPAST_HUMAN	SPAST	3156.68	3087.04	6715.03	6670.55	8509.37	6836.24
P62166	P62166	NCS1_HUMAN	NCS1	5860.13	6262.41	2940.8	2846.9	8503.33	7907.62
P42574	P42574	CASP3_HUMAN	CASP3	8644.5	8109.69	6360.26	6252.53	8290.54	7809.44
Q8TCV5	Q8TCV5	WFDC5_HUMAN	WFDC5	4886.63	4588.8	5856.88	5785.83	8259.92	10087.5
Q96H79	Q96H79	ZCCHL_HUMAN	ZC3HAV1L	8130.94	7079.73	13003.6	13015.4	8165.67	8482.04
P24723	P24723	KPCL_HUMAN	PRKCH	9640.79	23756.7	4872.85	4745.39	7857.51	8683.25
P61024	P61024	CKS1_HUMAN	CKS1B	30167.4	33306.9	3656.74	3533.67	7655.91	6360.42
Q5DT21	Q5DT21	ISK9_HUMAN	SPINK9	3935.64	3292.75	1413.38	1423.47	7639.29	10924.1
P98196	P98196	AT11A_HUMAN	ATP11A	4806.64	3282.01	4153.93	4012.82	7626.18	9119.04
Q96J01	Q96J01	THOC3_HUMAN	THOC3	5855.07	6484.17	10222.6	10169.2	7395.11	6160.46
Q12982;Q86WG3	Q12982;Q86WG3	ATCAY_HUMAN;BNIP2_HUMAN	ATCAY;BNIP2	4622.13	5691.93	6073.78	5987.6	7379.83	6326.2
Q70IA6	Q70IA6	MOB2_HUMAN	MOB2	7804.33	7200.98	4026.29	3927.72	7220.66	11280.2
P26045	P26045	PTN3_HUMAN	PTPN3	6892.44	5042.87	4250.26	4126.27	7173.67	7586.81
Q99943	Q99943	PLCA_HUMAN	AGPAT1	2846.04	4091.5	2815.58	2687.5	7170.9	6012.44
Q9GZZ8	Q9GZZ8	LACRT_HUMAN	LACRT	4265.58	5332.79	2005.31	1945.2	7129.14	7777.02
Q96F63	Q96F63	CCD97_HUMAN	CCDC97	5561.27	4468.22	6594.2	6514.15	7025.66	1742.9
Q9BRX8	Q9BRX8	PXL2A_HUMAN	PRXL2A	5177.01	7330.96	3431.08	3372.02	6933.98	6165.46
O60499	O60499	STX10_HUMAN	STX10	1544.3	1484.52	3682.34	3551.19	6815	6080.37
Q9NYL9	Q9NYL9	TMOD3_HUMAN	TMOD3	6688.72	5798.09	9146.98	9136.48	6769.44	7343.76
O75556	O75556	SG2A1_HUMAN	SCGB2A1	4808.75	3468.86	3852.07	3750.99	6740.37	5455.2
P25815	P25815	S100P_HUMAN	S100P	2275.54	2181.72	13753	13757.5	6522.82	8542.04
Q9NWD8	Q9NWD8	TM248_HUMAN	TMEM248	4962.93	6232.66	4952.41	4831.23	6462.04	7130.46
Q9Y5W9	Q9Y5W9	SNX11_HUMAN	SNX11	1794.5	2106.39	2844.96	2704.11	6438.14	7125.64
Q8NEX9	Q8NEX9	DR9C7_HUMAN	SDR9C7	3268.89	4177.6	3725.96	3600.11	6393.45	9893.77
P54819	P54819	KAD2_HUMAN	AK2	2374.83	3155.06	5148.72	5044.18	6290.75	4321.07
P15260	P15260	INGR1_HUMAN	IFNGR1	3276.41	4292.18	2281.47	2240.94	6285.75	6165.41
P36896	P36896	ACV1B_HUMAN	ACVR1B	1500.84	1585.81	3687.83	3565.92	6271.26	5988.62
O14678	O14678	ABCD4_HUMAN	ABCD4	1284.94	2483.88	1400.16	1410.11	6145.7	4884.06
Q15323	O76011;Q14525;Q15323;O76009	K1H1_HUMAN	KRT31	3027.61	3120.07	16485.2	16536.2	5989.48	8430.48
O15403	O15403	MOT7_HUMAN	SLC16A6	1745.47	2042.39	4128.25	3992.45	5966.09	4577.63
Q14849	Q14849	STAR3_HUMAN	STARD3	1460.97	1567.98	1442.83	1447.29	5848.98	7274.69
Q5W0Z9	Q5W0Z9	ZDH20_HUMAN	ZDHHC20	3645.7	2635.28	4407.32	4246.52	5727.78	6618.6
P04626	P04626	ERBB2_HUMAN	ERBB2	3564.5	3675.39	2111.28	2040.38	5664.28	6042.57
Q9ULX9	Q9ULX9	MAFF_HUMAN	MAFF	1592.66	1690.05	13893.9	13967.2	5660.34	2835.74
Q7Z4F1	Q7Z4F1	LRP10_HUMAN	LRP10	2918.05	2758.65	1285.1	1283.62	5616.19	3865.85
Q99661	Q99661	KIF2C_HUMAN	KIF2C	2933.46	3907.11	6960.35	6885.94	5586.38	6466.58
Q7L5L3	Q7L5L3	GDPD3_HUMAN	GDPD3	3534.5	2593	14715.7	14869.4	5457.11	4385.9
Q24JP5	Q24JP5	T132A_HUMAN	TMEM132A	4917.37	4571.4	2153.68	2078.4	5348.67	4455.41
Q969E2	Q969E2	SCAM4_HUMAN	SCAMP4	2890.88	4787.05	6984.19	6919.05	5345.22	3483.77
P31040	P31040	SDHA_HUMAN	SDHA	2865.31	3506.07	5050.43	4934.74	5314.87	4896.48
Q9H8Y5	Q9H8Y5	ANKZ1_HUMAN	ANKZF1	1935.98	2087.59	4145.95	4007.35	5297.05	5813.92
P50213	P50213	IDH3A_HUMAN	IDH3A	2125.54	1778.75	3533.97	3424.79	5275.05	6035.17
O00625	O00625	PIR_HUMAN	PIR	3389.54	5030.8	2913.01	2798.04	5219.16	4823.94
Q96KB5	Q96KB5	TOPK_HUMAN	PBK	2459.25	1874.17	3406.75	3309.33	5202.14	3918.4
Q9Y5S1	Q9Y5S1	TRPV2_HUMAN	TRPV2	1544.72	2763.05	1451.82	1457.44	5142.91	4237.31
Q9UIG8	Q9UIG8	SO3A1_HUMAN	SLCO3A1	2132.12	2210.61	787.049	770.973	5133.44	6571.06
P22532	P22532;P35325	SPR2D_HUMAN	SPRR2D	2847.46	2289.77	8444.3	8413.87	5107.46	7730.4
P30084	P30084	ECHM_HUMAN	ECHS1	7036.44	5686.81	4915.09	4816.25	5020.61	3257.76
P78381	P78381	S35A2_HUMAN	SLC35A2	2787.46	3078.9	5989.94	5922.44	4968	3433.08
P07476	P07476	INVO_HUMAN	IVL	2953.71	3070.65	26887	26210.7	4957.08	3367.69
O15440	O15440	MRP5_HUMAN	ABCC5	2376.34	1321.12	2282.42	2242.41	4926.87	5767.18
Q15399	Q15399;Q9Y2C9	TLR1_HUMAN	TLR1	2115.21	2259.52	4276.15	4146.36	4821.17	5749.98
Q69YN2	Q69YN2	C19L1_HUMAN	CWF19L1	7223.55	3262.94	4513.95	4370.81	4778.56	7660.97
Q9Y548	Q9Y548	YIPF1_HUMAN	YIPF1	2402.82	3055.76	2568.81	2462.72	4753.71	3269.76
O14494	O14494	PLPP1_HUMAN	PLPP1	4436.66	4793.24	1291.98	1291.87	4724.36	5529.31
P21860	P21860	ERBB3_HUMAN	ERBB3	2654.09	2747.11	3119.31	3037.15	4693.16	7615.95
O94760	O94760	DDAH1_HUMAN	DDAH1	1502.84	1800.34	1103.64	1080.82	4647.6	5329.46
P00441	P00441	SODC_HUMAN	SOD1	2852.78	3474.62	3653.76	3531.24	4564.52	4035.85
Q96BS2	Q96BS2	CHP3_HUMAN	TESC	3563.04	3462.04	2411.29	2327.63	4515.32	3876.85
Q08334	Q08334	I10R2_HUMAN	IL10RB	3854.3	3636.38	1934.73	1870.1	4515.12	3913.37
Q96AB3	Q96AB3	ISOC2_HUMAN	ISOC2	2303.1	2213.41	4433.31	4282.63	4465.54	6600.17
Q96SI9	Q96SI9	STRBP_HUMAN	STRBP	2977.39	3857.67	11015.8	10909.2	4437.14	3878.01
Q8IZN3	Q8IZN3	ZDH14_HUMAN	ZDHHC14	3539.45	3651.14	5356.03	5222.12	4407.36	5316.05
Q96A54	Q96A54	PAQR1_HUMAN	ADIPOR1	5183.94	2763.51	3514.75	3406.97	4367.64	6130.5
Q86UW9	Q86UW9	DTX2_HUMAN	DTX2	6505.09	6174.72	11237.7	11141.7	4352.24	5723.18
Q96B67	Q96B67	ARRD3_HUMAN	ARRDC3	2609.18	2555.78	3511.24	3406.39	4347.36	4283.24
O15194	O15194	CTDSL_HUMAN	CTDSPL	2619.8	2875.2	6501.86	6458.62	4301.88	4451.25
Q9H788	Q9H788	SH24A_HUMAN	SH2D4A	4220.36	3940.55	7953.71	7847.08	4284.14	4797.88
Q96HR9	Q96HR9	REEP6_HUMAN	REEP6	2417.55	1759.35	2007.33	1949.06	4231.94	2227
Q53GA4	Q53GA4	PHLA2_HUMAN	PHLDA2	1946.09	2037.85	1217.51	1205.76	4230.69	4442.56
Q9UK76	Q9UK76	JUPI1_HUMAN	JPT1	1808.73	2348.46	1182.24	1159.93	4217.35	2648.61
O43572	O43572	AKA10_HUMAN	AKAP10	5615.8	7320.52	3723.31	3599.63	4204.54	4133.32
Q8WXX5	Q8WXX5	DNJC9_HUMAN	DNAJC9	3854.31	2520.64	7843.15	7712.16	4132.81	2684.89
Q96DX4	Q96DX4	RSPRY_HUMAN	RSPRY1	3100.5	3838.58	2366.22	2306.55	4124.71	2772.62
P02776;P10720	P02776;P10720	PF4V_HUMAN;PLF4_HUMAN	PF4;PF4V1	3212.38	2002.63	360.669	379.668	4033.99	3971.22
P63272	P63272	SPT4H_HUMAN	SUPT4H1	2288.22	2388.83	9254.09	9263.01	4029.88	3455.01
Q9ULR0	Q9ULR0	ISY1_HUMAN	ISY1	3085.28	4437.46	4228.28	4107.32	3997.3	1716.59
Q9BR61	Q9BR61	ACBD6_HUMAN	ACBD6	4448.43	4218.67	2267.87	2228.51	3992.97	3888.06
Q15291	Q15291	RBBP5_HUMAN	RBBP5	3105.08	4451.07	5586.06	5470.47	3977.88	5641.91
Q92804	Q92804	RBP56_HUMAN	TAF15	2339.76	2074.58	6232.13	6173.77	3931.56	1709.21
Q9H773	Q9H773	DCTP1_HUMAN	DCTPP1	3179.68	2785.02	6322.91	6229.71	3914.49	3997.85
P33240	P33240	CSTF2_HUMAN	CSTF2	4287.35	4308.69	6463.91	6395.43	3901.4	3709.59
O75348	O75348	VATG1_HUMAN	ATP6V1G1	1804.02	1136.14	6391.47	6324.52	3854.43	2846.37
P49459	P49459	UBE2A_HUMAN	UBE2A	2139.7	1254.96	2421.38	2346.44	3808.76	3706.66
Q6P988	Q6P988	NOTUM_HUMAN	NOTUM	3934.88	3935.82	14953.8	15159.1	3794.46	5050.59
Q9NT22	Q9NT22	EMIL3_HUMAN	EMILIN3	3357.57	3354.12	2653.82	2540.31	3752.27	1918.97
Q8IZR5	Q8IZR5	CKLF4_HUMAN	CMTM4	3876.13	3938.79	3110.47	3025.22	3742.29	3209.39
Q9H900	Q9H900	ZWILC_HUMAN	ZWILCH	4260.84	3024.06	4346.53	4186.37	3741.43	3797.29
Q96S86	Q96S86	HPLN3_HUMAN	HAPLN3	8854.28	6714.38	1124.94	1113.46	3723.83	4446.03
P32320	P32320	CDD_HUMAN	CDA	924.517	594.167	7379.82	7235.84	3702.57	4004.05
P26885	P26885	FKBP2_HUMAN	FKBP2	4388.39	2430.7	2382.42	2314.43	3702.1	3040.29
O00584	O00584	RNT2_HUMAN	RNASET2	2944.72	2783.83	8083.95	8032.65	3643.28	3382.52
O94806	O94806;Q15139	KPCD3_HUMAN	PRKD3	2900.25	1880.76	2465.01	2373.24	3641.15	3356.52
P62273	P62273	RS29_HUMAN	RPS29	1952.53	2774.52	2707.43	2585.38	3637.23	3045.47
Q9BWU0	Q9BWU0	NADAP_HUMAN	SLC4A1AP	1536.29	2331.34	4714.42	4564.53	3608.94	2404.23
Q8TF72	Q8TF72	SHRM3_HUMAN	SHROOM3	5473.39	2150.38	1627.28	1616.36	3575.24	3706.34
Q53TN4	Q53TN4	CYBR1_HUMAN	CYBRD1	1906.71	2131	2855.68	2726.71	3567.9	8719.65
P09619	P09619	PGFRB_HUMAN	PDGFRB	2340.76	2752.62	1427.6	1432.51	3567.88	2822.45
Q8TCG2	Q8TCG2	P4K2B_HUMAN	PI4K2B	996.658	997.44	1278.2	1263.94	3550.47	3408.11
O75629	O75629	CREG1_HUMAN	CREG1	7353.84	5907.33	4357.36	4189.02	3538.25	6557.67
Q9UGH3	Q9UGH3	S23A2_HUMAN	SLC23A2	7356.66	6474.31	3237.15	3135.88	3514.4	3067.62
P18858	P18858	DNLI1_HUMAN	LIG1	2265.96	2691.48	4700.76	4549.37	3491.23	3044.88
Q13873	Q13873	BMPR2_HUMAN	BMPR2	2023.81	1766.93	1647.28	1627.19	3479.23	3741.08
Q9NVH1	Q9NVH1	DJC11_HUMAN	DNAJC11	4070.22	6798.6	1755.96	1720.17	3474.19	5712.25
Q96L46	Q96L46	CPNS2_HUMAN	CAPNS2	2729.83	3177.03	3291.54	3195.26	3471.98	4754.43
Q96A29	Q96A29	FUCT1_HUMAN	SLC35C1	3362.25	3840.36	3175.3	3090.46	3461.89	2596.85
Q147X3	Q147X3	NAA30_HUMAN	NAA30	3411.49	3485.24	4717.66	4570.34	3460.11	2773.43
Q9NZC3	Q9NZC3	GDE1_HUMAN	GDE1	5281.1	4981.31	2927.91	2818.73	3456.81	4870.12
Q9Y608	Q9Y608	LRRF2_HUMAN	LRRFIP2	2972.08	3247.29	2984.09	2882.27	3447.14	3646.22
Q9UHD9	Q9UHD9	UBQL2_HUMAN	UBQLN2	2758.41	4729.76	2972.55	2870.63	3421.98	4693.2
Q13112	Q13112	CAF1B_HUMAN	CHAF1B	3630.85	3316.88	8327.75	8283.49	3392.4	4283.34
P04279	P04279;Q02383	SEMG1_HUMAN	SEMG1	2382.62	4535.54	1945.37	1880.6	3359.92	2617.67
Q03113	Q03113	GNA12_HUMAN	GNA12	1464.7	2676	2523.86	2402.04	3338.3	3350.28
Q9Y646	Q9Y646	CBPQ_HUMAN	CPQ	2873.26	1566.48	1815.67	1764.23	3309.15	4066.9
Q9GZN8	Q9GZN8	CT027_HUMAN	C20orf27	3642.52	3529.61	3556.98	3453.67	3298.63	4670.61
Q86XS8	Q86XS8	GOLI_HUMAN	RNF130	1139.29	1314.03	1284.15	1282.64	3284.26	2599.35
O60293	O60293	ZC3H1_HUMAN	ZFC3H1	4210.63	4077.25	5346.67	5218.46	3266.68	2594.93
Q8TCT8	Q8TCT8	SPP2A_HUMAN	SPPL2A	1972.74	2238.67	693.132	648.547	3240.78	4225.73
Q86YP4	Q86YP4	P66A_HUMAN	GATAD2A	2012.89	1217.72	3705.85	3582.46	3228.5	1859.56
P99999	P99999	CYC_HUMAN	CYCS	1693.42	1197.01	5069.48	4937.34	3219.61	3449.21
Q96A49	Q96A49	SYAP1_HUMAN	SYAP1	3232.49	2166.33	2033.68	1973.91	3211.5	3377.42
Q5VT66	Q5VT66;Q969Z3	MARC1_HUMAN	MTARC1	7667.2	5607.73	4132.89	3999.03	3197.52	4151.76
Q8TBZ3	Q8TBZ3	WDR20_HUMAN	WDR20	2337.34	2377.36	2474.37	2379.16	3187.54	3330.37
Q6NTF9	Q6NTF9	RHBD2_HUMAN	RHBDD2	2906.84	3655.21	3850.37	3738.85	3170.9	3687.79
P29597	P29597	TYK2_HUMAN	TYK2	4074.18	2697.24	3241.28	3141.64	3131.86	3121.36
Q13257	Q13257	MD2L1_HUMAN	MAD2L1	1869.85	2808.28	3537.43	3434.5	3127.03	3661.23
Q9NYQ6	Q9NYQ6	CELR1_HUMAN	CELSR1	5184.66	4420.22	1603.4	1586.54	3114.12	3530.55
Q92563	Q92563	TICN2_HUMAN	SPOCK2	2048.95	3062.26	7721.02	7590.77	3107.73	2035.81
P33552	P33552	CKS2_HUMAN	CKS2	17936.2	18772.1	2091.05	2026.94	3106.14	3305.93
O43290	O43290	SNUT1_HUMAN	SART1	2463.33	1947.98	2826.52	2695.25	3102.73	2843.89
Q86XP3	Q86XP3	DDX42_HUMAN	DDX42	3424.66	3467.83	4551.01	4410.68	3094.98	4808.56
Q8IWE4	Q8IWE4	DCNL3_HUMAN	DCUN1D3	1816.16	2071.11	5048.92	4932.2	3094.89	2536.28
Q8N441	Q8N441	FGRL1_HUMAN	FGFRL1	2075.05	2935.05	19623.7	19486.9	3049.86	2883.83
P55000	P55000	SLUR1_HUMAN	SLURP1	1420.53	1971.34	1438.8	1441.46	3048.87	4482.71
Q9UBN6	Q9UBN6	TR10D_HUMAN	TNFRSF10D	3997.62	5625.92	5301.18	5171.04	3036.98	2641.78
P49427	P49427	UB2R1_HUMAN	CDC34	4092.28	5707.19	6167.54	6107.77	3031.98	6492.39
Q8N6M0	Q8N6M0	OTU6B_HUMAN	OTUD6B	4264.63	2410.14	2971.78	2868.58	3000.17	2871.18
Q9NX46	Q9NX46	ADPRS_HUMAN	ADPRS	1737.62	2459.33	1733.82	1704.34	2993.45	2452.14
Q5SR56	Q5SR56	MF14B_HUMAN	MFSD14B	616.857	443.457	243.58	312.268	2976.57	3016.15
Q9BZJ0	Q9BZJ0	CRNL1_HUMAN	CRNKL1	3903.98	4802.31	6146.37	6084.18	2918.01	2098.86
O60266	O60266	ADCY3_HUMAN	ADCY3	778.286	529.365	1326.13	1348.08	2887.36	1901.18
Q9NWT6	Q9NWT6	HIF1N_HUMAN	HIF1AN	1490.99	2133.82	2367.34	2306.95	2866.1	3166.61
P00505	P00505	AATM_HUMAN	GOT2	2189.75	1817.41	4008.87	3915.08	2858.31	2694.39
P00403	P00403	COX2_HUMAN	MT-CO2	3984.44	3439.56	12646.7	12695.8	2801.12	2088.74
O00762	O00762	UBE2C_HUMAN	UBE2C	1560.41	1703.59	3367.19	3279.58	2748.77	2895.95
O43896	O43896	KIF1C_HUMAN	KIF1C	608.789	1602.9	1028.14	1009.53	2745.81	801.183
O95239	O95239;Q2VIQ3	KIF4A_HUMAN	KIF4A	2509.82	3440.61	6512.92	6460.61	2740.87	2849.58
O75379	O75379	VAMP4_HUMAN	VAMP4	1342.82	1371.72	1010.02	987.448	2719.54	3050.1
O14776	O14776	TCRG1_HUMAN	TCERG1	2845.64	2622.58	4896.43	4773.36	2714.14	3132.38
O95302	O95302	FKBP9_HUMAN	FKBP9	3907.05	5329.21	1165.7	1152.83	2619.4	2557
P57730	P57730	CAR18_HUMAN	CARD18	937.594	1933.67	3225.54	3119.61	2555.85	3403.65
O15446	O15446	RPA34_HUMAN	POLR1G	1840.06	1436.07	3259.86	3156.2	2519.48	2921.31
P20290	P20290	BTF3_HUMAN	BTF3	4365.32	4010.66	10512.1	10432.8	2499.4	4327.04
Q969W9	Q969W9	PMEPA_HUMAN	PMEPA1	5706.59	6834.62	1073.64	1073.48	2472.53	3238.43
O75150	O75150	BRE1B_HUMAN	RNF40	2048.32	1441.88	3932.01	3839.22	2419.1	2171.59
Q6KC79	Q6KC79	NIPBL_HUMAN	NIPBL	1628.54	2216.27	3091.89	3007.41	2363.93	2342.94
Q9UBK9	Q9UBK9	UXT_HUMAN	UXT	2533.72	3277.31	4681.19	4525.86	2293.23	2941.87
P51784	P51784	UBP11_HUMAN	USP11	3703.67	3568.79	6605.14	6542.42	2281.1	2832.2
Q00688	Q00688	FKBP3_HUMAN	FKBP3	1853.4	2310.38	3164.1	3072.74	2241.41	2726.17
O95400	O95400	CD2B2_HUMAN	CD2BP2	4320.34	4120.69	7038.77	6958.36	2227.31	3465.77
P38432	P38432	COIL_HUMAN	COIL	2624.12	2243.69	2681.54	2561.15	2181.33	3492.32
O75354	O75354	ENTP6_HUMAN	ENTPD6	3647.77	4929.86	1967.5	1895.29	2174.73	2052.38
Q9NWS0	Q9NWS0	PIHD1_HUMAN	PIH1D1	1871.81	1172.06	3096.37	3014.38	2168.96	2114.74
Q9NQE9	Q9NQE9	HINT3_HUMAN	HINT3	1834.48	2207.47	2158.03	2094.01	2156.4	2788.27
P54852	P54852	EMP3_HUMAN	EMP3	2147.53	1937.55	680.446	628.192	2084.78	2700.67
P48594	P48594	SPB4_HUMAN	SERPINB4	2050.76	2890.68	4576.08	4446.34	2068.49	2007.78
Q02487	Q02487	DSC2_HUMAN	DSC2	1643.35	1489.01	1565.59	1549.44	2053.62	2107.25
Q8NB46	Q8NB46	ANR52_HUMAN	ANKRD52	1563.84	1581.04	1446.2	1453.75	2027.81	1551.34
Q15038	Q15038	DAZP2_HUMAN	DAZAP2	1491.11	1690.84	1382.05	1394.81	2015.2	1505.87
Q96I25	Q96I25	SPF45_HUMAN	RBM17	2287.73	2889.13	3019.27	2931.26	2004.94	1814.59
Q9NX63	Q9NX63	MIC19_HUMAN	CHCHD3	1389.66	2216.65	6448.86	6378.75	2000.76	2641.19
P55957	P55957	BID_HUMAN	BID	971.671	1169.27	1061.47	1060.37	1996.18	1741.79
Q9BXY0	Q9BXY0	MAK16_HUMAN	MAK16	3636.75	3406.69	3108.2	3024.96	1996.13	1511.12
Q0PNE2	Q0PNE2	ELP6_HUMAN	ELP6	894.013	1578.29	1706.17	1670.42	1987.17	2483.52
Q8IVB5	Q8IVB5	LIX1L_HUMAN	LIX1L	1367.71	1491.37	1281.56	1274.17	1980.23	1575.95
Q08379	Q08379	GOGA2_HUMAN	GOLGA2	1913.17	2672.47	1898.26	1830.01	1935.58	1082.02
Q9HAS0	Q9HAS0	NJMU_HUMAN	C17orf75	1895.93	1354.63	3333.05	3234.63	1908.63	2216.02
O43929	O43929	ORC4_HUMAN	ORC4	2330.87	2166.47	3636.46	3516.54	1880.57	1844.84
Q6PJI9	Q6PJI9	WDR59_HUMAN	WDR59	1539.57	1632.9	2456.48	2359.12	1874.97	2438.54
P46013	P46013	KI67_HUMAN	MKI67	1807.13	2253.62	2931.62	2830.28	1869.02	2272.84
O15226	O15226	NKRF_HUMAN	NKRF	1965.58	1958.47	4284.95	4150.44	1851.19	1014.57
O15243	O15243	OBRG_HUMAN	LEPROT	1178.49	1405.21	875.474	852.932	1848.03	3003.34
Q9Y6Y0	Q9Y6Y0	NS1BP_HUMAN	IVNS1ABP	1772.71	2389.77	2094.51	2031.29	1821.52	1916.31
Q9BX79	Q9BX79	STRA6_HUMAN	STRA6	7648.44	7829.57	25031.5	24498.7	1815.31	1718.61
Q8TDX6	Q8TDX6	CGAT1_HUMAN	CSGALNACT1	3179.13	3653.72	499.965	535.288	1814.39	2379.18
Q96GD4	Q96GD4	AURKB_HUMAN	AURKB	1610.39	1642.04	2099.53	2034.66	1794.56	2199.35
P62380	P62380	TBPL1_HUMAN	TBPL1	1805.43	2107.19	2271.32	2230.17	1793.53	1908.76
Q96G21	Q96G21	IMP4_HUMAN	IMP4	1291.63	1908.36	4021.19	3925.98	1788.93	1693.09
Q9Y237	Q9Y237	PIN4_HUMAN	PIN4	1734.77	1312.48	2960.22	2865.12	1786.9	1421.39
Q8WXD5	Q8WXD5	GEMI6_HUMAN	GEMIN6	2525.03	2710.06	3027.98	2945.28	1781	3211.01
Q8IWS0	Q8IWS0	PHF6_HUMAN	PHF6	1720.39	1336.07	7052.67	6986.28	1778.92	1913.61
Q8NFG4	Q8NFG4	FLCN_HUMAN	FLCN	446.628	753.264	939.856	922.344	1778.31	1181.13
Q69YN4	Q69YN4	VIR_HUMAN	VIRMA	2278.05	2514.26	2228.33	2171.06	1776.1	1943.87
P41208	P41208	CETN2_HUMAN	CETN2	2162.36	2326.79	2646.92	2539.02	1766	1287.62
Q6UXD5	Q6UXD5	SE6L2_HUMAN	SEZ6L2	867.815	1389.75	744.318	724.483	1750.87	1788.46
Q8NFZ8	Q8NFZ8	CADM4_HUMAN	CADM4	1728.22	2236.36	4389.21	4227.46	1749.03	1486.83
Q9Y2E5	Q9Y2E5	MA2B2_HUMAN	MAN2B2	1031.34	1486.6	2199.31	2134.93	1722.97	1585.64
Q9ULX6	Q9ULX6	AKP8L_HUMAN	AKAP8L	730.335	1904.35	2428.89	2349.64	1682.18	1247.19
O14519	O14519	CDKA1_HUMAN	CDK2AP1	909.371	1436.43	1401.97	1410.73	1679.19	1562.19
Q9HD15	Q9HD15	SRA1_HUMAN	SRA1	1386.17	1421.94	1496.44	1492.6	1627.9	1137.17
Q3SXY8	Q3SXY8	AR13B_HUMAN	ARL13B	1931.97	1495.12	829.869	801.097	1627.39	1664.44
Q9H6Y2	Q9H6Y2	WDR55_HUMAN	WDR55	2150.37	1571.28	1167.87	1154.96	1607.66	1318.83
Q7Z698	Q7Z698	SPRE2_HUMAN	SPRED2	987.433	1251.74	1436.61	1438.91	1587.49	953.008
Q9NS87	Q9NS87	KIF15_HUMAN	KIF15	1694.67	1274.28	1443.12	1448.76	1544.25	628.958
P17081	P17081	RHOQ_HUMAN	RHOQ	1658.17	1697.75	1556.07	1534.24	1543.9	2315.37
Q15007	Q15007	FL2D_HUMAN	WTAP	2066.33	2630.46	3291.42	3194.91	1537.94	2298.71
O95251	O95251	KAT7_HUMAN	KAT7	1885.86	1368.11	2359.46	2302.78	1525.94	1989.47
Q13503	Q13503	MED21_HUMAN	MED21	1397.08	1448.21	3360.22	3277.93	1490.56	1256.1
Q13546	Q13546	RIPK1_HUMAN	RIPK1	1060.05	1499.58	1827.26	1778.36	1469.85	1554.35
Q93074	Q93074	MED12_HUMAN	MED12	742.281	1355.19	2942.7	2847.68	1463.03	975.028
Q92963	Q92963	RIT1_HUMAN	RIT1	1158.95	1026.72	929.99	912.401	1455.67	1566.69
P14854	P14854	CX6B1_HUMAN	COX6B1	1465	1856.63	3067.32	2990.04	1451.84	1824.85
Q15058	Q15058	KIF14_HUMAN	KIF14	1161.09	1599.47	2449.63	2355.96	1436.29	1338.71
O43395	O43395	PRPF3_HUMAN	PRPF3	1921.9	1396.42	2310.94	2267.7	1430.63	1408.23
Q9NX55	Q9NX55	HYPK_HUMAN	HYPK	1468.6	1232.21	2130.17	2059.88	1412.92	2145.1
Q9NSI2	Q9NSI2	SLX9_HUMAN	SLX9	2585.22	4199.35	3303.18	3216.5	1348.67	2005.7
P25208	P25208	NFYB_HUMAN	NFYB	2484.79	2442.26	3424.8	3365.84	1293.99	2236.4
Q9BY77	Q9BY77	PDIP3_HUMAN	POLDIP3	763.522	1253.55	1269.51	1260.1	1286.08	648.927
O60936	O60936	NOL3_HUMAN	NOL3	1287.92	875.104	856.751	831.426	1272.76	2357.59
Q86YB7	Q86YB7	ECHD2_HUMAN	ECHDC2	1025.85	909.434	1597.21	1573.54	1265.68	1060.89
O43583	O43583	DENR_HUMAN	DENR	857.691	682.925	1551.31	1532.39	1247.68	1313.03
Q7Z7K6	Q7Z7K6	CENPV_HUMAN	CENPV	2689.27	4279.4	8191.44	8143.32	1231.97	1200.12
Q2VPB7	Q2VPB7	AP5B1_HUMAN	AP5B1	475.115	382.315	1144.52	1135.55	1180.67	1201.16
P62487	P62487	RPB7_HUMAN	POLR2G	1408.95	2872.54	1622.54	1612.14	1160.47	1271.82
Q96CF2	Q96CF2	CHM4C_HUMAN	CHMP4C	2237.58	1299.24	2330.7	2283.25	1143.89	1602.3
Q96JW4	Q8IVJ1;Q96JW4	S41A2_HUMAN	SLC41A2	928.591	383.104	123.436	183.553	1130.69	880.287
Q96MX6	Q96MX6	DAA10_HUMAN	DNAAF10	796.601	2160.28	2792.95	2665.97	1093.45	1451.67
Q02218	Q02218	ODO1_HUMAN	OGDH	2431.89	2669.93	3331.2	3234.45	1088.54	1946.17
P42684	P42684	ABL2_HUMAN	ABL2	868.293	750.592	973.586	957.666	1077.05	644.75
P78316	P78316	NOP14_HUMAN	NOP14	1912.89	1198.28	3278.45	3167.87	1049.74	1160.76
Q13123	Q13123	RED_HUMAN	IK	307.491	428.444	1486.7	1480.4	1040.32	1276.28
Q96P11	Q96P11	NSUN5_HUMAN	NSUN5	496.321	1150.98	3551.26	3447.58	1033.22	831.098
P15692	P15692	VEGFA_HUMAN	VEGFA	1835.22	1481.06	829.941	801.706	1001.39	1569.13
Q969S3	Q969S3	ZN622_HUMAN	ZNF622	1363.59	1613.85	3025.28	2941.5	852.372	993.772
Q13011	Q13011	ECH1_HUMAN	ECH1	1865.28	545.181	5240.57	5133.58	817.109	179.163
Q5T4F7	Q5T4F7	SFRP5_HUMAN	SFRP5	1631.35	1539.54	15397.2	15586.4	762.513	932.846
Q9UFC0	Q9UFC0	LRWD1_HUMAN	LRWD1	1782.82	1072.1	4208.29	4074.97	691.547	1155.77
Q8IVH8	Q8IVH8	M4K3_HUMAN	MAP4K3	866.905	930.971	1714.76	1685.97	634.05	1071.99
Q9Y3E5	Q9Y3E5	PTH2_HUMAN	PTRH2	284.011	858.34	237.178	300.934	367.334	670.213

## Sheet: mouse cancer cell lines exo
Protein ID	Genes	MC38-EXO-1	MC38-EXO-2	MC38-EXO-3	LFQ intensity GXJ-B16-exo-1	LFQ intensity GXJ-B16-exo-2	LFQ intensity GXJ-B16-exo-3
P16858	Gapdh	403982	303327	307878	521050000	546440000	525560000
P05213	Tuba1b	0	0	0	226560000	218980000	228460000
P63260;P60710	Actg1	679264	530626	564966	217730000	210330000	203760000
P63017	Hspa8	749585	888525	866172	197140000	202570000	195910000
Q8R366	Igsf8	262055	208649	198218	177610000	175130000	177820000
P68372;Q9D6F9	Tubb4b	191438	185631	214842	171140000	181590000	162060000
O08992	Sdcbp	361697	386548	355302	134010000	132720000	132020000
Q9WU78	Pdcd6ip	885623	1024140	954427	133420000	118830000	121520000
Q05793	Hspg2	1402460	1794860	1691800	108020000	108320000	108200000
Q68FD5	Cltc	472412	492707	486139	100450000	97753000	99630000
P10126	Eef1a1	772916	783476	817612	92945000	88806000	92601000
P17182	Eno1	281119	263487	197314	87949000	84744000	91958000
P68372;Q9D6F9;P99024	Tubb5	1172760	1100900	1154560	77330000	76242000	78836000
Q9DBJ1	Pgam1	313525	338634	332316	71546000	73885000	71166000
P52480	Pkm	500556	463621	473523	65630000	69190000	66754000
P11499;P07901	Hsp90ab1	603974	785953	768936	65303000	67088000	61179000
P11370	Fv4	92037.6	141703	123636	52972000	50272000	49695000
P35762	Cd81	95145.1	117390	99886.1	40406000	39829000	39052000
P10107	Anxa1	407188	280904	314142	38081000	34793000	35852000
P19096	Fasn	99025.8	90956.1	103776	31815000	30706000	31623000
P07356	Anxa2	377286	297965	254174	30886000	31043000	39645000
P09411	Pgk1	329237	335908	311414	29530000	28217000	27671000
P17751	Tpi1	51953.5	70163.7	75028.6	29110000	26086000	29353000
Q9JHU4	Dync1h1	216849	219142	218466	28305000	26831000	26862000
Q8VDN2	Atp1a1	509999	583728	560178	27433000	24543000	33636000
P08226	Apoe	173493	181026	191519	25147000	25134000	24626000
P17742	Ppia	604690	689617	632298	23656000	23561000	22534000
P20152	Vim	87931.9	82475.8	87109.5	23304000	30315000	29801000
Q02053;P31254	Uba1	129894	129688	123974	21429000	22929000	22470000
Q8VDD5	Myh9	545019	615868	654961	18903000	18331000	18227000
P62827	Ran	271731	297878	292061	18826000	18314000	18273000
P14206	Rpsa	78617.8	86789.1	84432	18758000	19127000	17050000
O08585	Clta	84832.1	96384	87864.7	17493000	12984000	16404000
Q8CGC7	Eprs1	52164.7	63160.6	55384	17417000	14717000	13839000
P58252	Eef2	202175	239608	221213	17326000	17368000	18190000
P05064	Aldoa	149910	159737	143804	16982000	16237000	17948000
P45591;P18760	Cfl1	230485	258116	193530	16508000	17191000	17492000
P60710	Actb	0	0	0	16103000	14321000	15305000
P11276	Fn1	3409370	4169140	4167940	16067000	15908000	16213000
P08752	Gnai2	1352550	1312160	1223620	15052000	13153000	14190000
Q62419	Sh3gl1	355635	254124	254555	14959000	14884000	15613000
P62874	Gnb1	285314	394946	445184	14674000	13773000	14092000
P09055	Itgb1	351577	329382	359615	14626000	15586000	14145000
P07901	Hsp90aa1	139098	142630	154535	14117000	14135000	14624000
P62806	H4c1	383919	522552	484167	13786000	14963000	13948000
P62983	Rps27a	1715670	1842530	1541190	13701000	16617000	17822000
Q9WUA3	Pfkp	14872.1	16658.6	12379.8	13532000	13820000	13179000
P68373;P68369;Q3UX10;P68368;P05213	Tuba4a	4152940	4115990	4701420	13377000	14870000	13089000
P42932	Cct8	202700	151899	162638	13127000	13233000	14397000
Q04447	Ckb	17835.8	14211.1	10732.4	12983000	13618000	12958000
P80314	Cct2	96803.7	102086	103448	12927000	13802000	13263000
Q61753	Phgdh	137502	216297	186964	12792000	11794000	12482000
P68033	Actc1	0	0	0	12695000	10390000	29914000
P62242	Rps8	165176	139746	134521	12656000	12891000	12427000
P63101	Ywhaz	673182	634663	678234	12341000	11754000	11579000
P50247	Ahcy	496471	426466	503600	12299000	14063000	12621000
P48036	Anxa5	326486	299072	291301	12259000	16870000	14985000
P12382	Pfkl	129095	141459	136505	12019000	11314000	11553000
P68040	Rack1	118844	113008	105656	12005000	11620000	12148000
P29341	Pabpc1	146499	150738	147778	11798000	12589000	11822000
P62908	Rps3	182534	145600	146368	11746000	11542000	12692000
P80315	Cct4	77344.4	67484.3	82980.8	11510000	11670000	12033000
Q792F9	Itga4	0	0	0	11505000	11708000	11544000
Q2TA50	Mlana	0	0	0	11478000	10310000	10353000
P80316	Cct5	145546	108102	111583	11378000	11411000	11179000
Q9QYJ0	Dnaja2	139376	159250	154234	10636000	10770000	10714000
P26039	Tln1	554909	609981	586138	10604000	10341000	9456500
P80318	Cct3	170261	167247	160763	10523000	10872000	10917000
P20029	Hspa5	39549.9	36538.8	35241.6	10396000	10235000	10678000
P80317	Cct6a	165856	154130	145196	10060000	9396800	9265500
B2RQC6	Cad	60657.6	65301.7	54569.9	9989800	9964200	9939100
P11983	Tcp1	111794	116052	116427	9896200	9310200	9420200
Q9D2U9;P70696;Q8CGP0;Q64525;Q6ZWY9;Q8CGP2;Q64524;P10853;Q64478;P10854;Q8CGP1;Q64475	H2bc12;H2bc4;H2bc7;H2bc9	147402	156404	146425	9890800	7692100	7189700
P62874;P62880	Gnb2	604761	825439	834811	9563500	9340800	9634100
P60843	Eif4a1	156141	154837	151026	9446600	10021000	8433500
Q3UH60	Dip2b	45081	48743.4	43602.9	9346600	8941500	9691200
P40240	Cd9	366111	246747	198973	9183100	9176600	8990500
Q01853	Vcp	200615	228732	220634	9165200	8973800	8748600
P10404	NA	401746	1014180	998293	9093300	9848800	11266000
Q91V92	Acly	113273	120401	126166	8832900	8232800	8622000
Q8BRB1	Epha3	0	0	0	8777400	8842300	9299300
P60335	Pcbp1	193456	175065	177480	8776400	8691400	8215600
Q9D8E6	Rpl4	89887.6	96474.1	78441.5	8773700	7921600	7936900
P46471	Psmc2	110216	94517.1	94209.3	8528100	8259400	7747300
P17809	Slc2a1	863120	673676	644716	8365000	8556700	8095500
Q9Z1Q9	Vars1	66815.2	84403.2	67667.1	8158200	9624900	9306200
Q78PY7	Snd1	32992	35994.9	41873.4	8112300	7807100	7947600
O08528;Q91W97	Hk2	7958.21	10054.4	7544.04	7828700	8394700	7998400
Q9D8N0	Eef1g	124573	187553	203626	7821800	8730300	8112100
O88342	Wdr1	167680	188746	188929	7794800	7933000	7373200
P97384	Anxa11	154364	159390	160303	7786000	8067800	7870000
P60766	Cdc42	275318	206015	288345	7476100	8467200	6588900
Q9R0N0	Galk1	319582	327190	340278	7446400	7350800	7702100
P07147	Tyrp1	14855.7	15771.5	13734.7	7279900	5597000	6134100
P21956	Mfge8	365251	498052	421341	7277800	7287200	7329900
Q61739	Itga6	54287.3	40792.7	42746.6	7257500	7919900	8791300
Q922D8	Mthfd1	89665.5	67606.3	72514.9	7205900	7876000	6856900
Q6ZQA6	Igsf3	55865	52226.3	54700.9	7203700	6841200	6668500
Q922B2	Dars1	73104.9	75923.7	73823	7144000	6927200	7313000
P62259	Ywhae	326187	302207	344346	7105300	8763100	8757600
P62754	Rps6	143017	125443	125538	7059700	6941300	7078300
Q9QXY6;Q9WVK4	Ehd1	325772	367625	360216	6981000	6222400	7181900
Q8VEK3	Hnrnpu	66549.8	78013.7	71636.4	6900600	6154800	6000200
P84228	H3c13	0	0	0	6898500	7613500	7547200
P80313	Cct7	78072.7	59316.7	63021.1	6805000	6564500	6970200
P63037	Dnaja1	177240	176779	207012	6676600	6624900	6565400
P63094;Q6R0H7	Gnas	297300	356500	389754	6675000	5857500	5863800
P27659	Rpl3	44678.6	88556.4	76787.1	6646800	5486200	5486600
P10852	Slc3a2	1578000	1509770	1671820	6498100	7019000	6905500
P14148	Rpl7	69639.1	84462.1	77710.8	6464800	5874300	6241100
Q9R045;Q8R0Z6	Angptl2	408855	392971	396681	6430300	6246200	6422100
P53026	Rpl10a	51415.3	46027.5	35887.6	6240500	4857300	5135700
P97351	Rps3a	59549.6	61486	57093.4	6067900	5100400	6162800
Q9CWJ9	Atic	204529	185953	179551	6059100	5273600	6186900
P51150	Rab7a	332181	426810	392080	6024900	5667200	5721500
Q9JII6	Akr1a1	76906.2	69680.3	65836.4	5992800	5894200	5906400
Q8BU30	Iars1	49532.7	49389.4	47238.1	5969700	5765500	4908700
P14869	Rplp0	130580	96203.6	114342	5936200	6237000	6072100
P25444	Rps2	65789.1	59804.7	47275.3	5788800	5426000	4745100
P23249	Mov10	105192	156862	147584	5689200	5486800	5633000
P08113	Hsp90b1	60516.7	60124.6	57191.3	5594700	5947600	5352900
P19157	Gstp1	77400.2	132524	97248.7	5568000	6156800	4377800
Q64337	Sqstm1	16514.4	45616.5	28261.7	5439900	5332900	5297700
P06745	Gpi	46548.7	59484	42165.7	5430400	5108800	5104400
Q810U5	Ccdc50	0	0	0	5358500	5339400	5105600
F8VPU2	Farp1	624550	542364	541782	5320900	5414200	5718900
Q8BMJ2	Lars1	46274.1	41849.7	40909.7	5307600	4447200	5290200
Q99PT1	Arhgdia	304281	305862	385451	5237300	5329600	5102200
Q61024	Asns	104975	89159.7	82966.3	5224700	5115400	5129500
P62835;Q99JI6	Rap1b	1508910	1551190	1861150	5146700	5308700	5059000
F6YVP7	Rps18-ps6	0	0	0	5138300	5105600	5143400
P29812	Dct	0	0	0	5135200	5160900	5088600
Q9WTI7	Myo1c	168408	184979	177289	5121300	5569400	5838900
Q9D1C8	Vps28	105949	109288	97131.3	5056100	5050300	4886800
Q9CPR4	Rpl17	37789.6	40115	34633.7	5047300	5352300	5661300
P62281	Rps11	59832.4	238852	204535	5001200	4994800	4961800
P56399	Usp5	50879.6	53564.2	55507.2	4976600	4674600	4291400
P45376	Akr1b1	220577	197540	179873	4942400	5147500	4842100
Q9D8B3	Chmp4b	229144	251851	241039	4897500	4998400	5170200
P86048;Q6ZWV3	Rpl10	120171	123701	70889.5	4881200	5565900	4605500
P31786	Dbi	10024.8	18050.8	18862.7	4857200	7475400	7491300
Q9DAS9	Gng12	232725	152262	141450	4845800	3397400	2593300
P62334	Psmc6	64115.5	62986.3	86798.5	4803100	5004700	4302200
Q99KQ4	Nampt	21508.5	23928.7	22532.3	4772300	5238700	5304600
O08553	Dpysl2	154592	122954	120415	4766400	4660600	4648400
P18572	Bsg	817061	805217	758629	4689000	4606000	4552300
Q09143	Slc7a1	144376	226098	270542	4638300	4999500	3181800
Q91ZX7	Lrp1	236443	249911	243986	4542300	4447400	4716800
P06151	Ldha	516523	583583	578794	4521500	3834000	3635000
P62196	Psmc5	49091.4	51201.8	52009.8	4518400	4508600	4579800
Q9D2V7	Coro7	0	0	0	4485000	4282800	3927400
P97429	Anxa4	75102.9	78654.1	80544	4469900	4294800	4744300
P33175;Q61768;P28738	Kif5b	46452.7	41699.8	50368.6	4466700	4647800	4270000
Q9CQV8	Ywhab	185146	214540	189727	4434900	4812300	4704200
Q9DC51	Gnai3	245978	260386	230198	4422200	4429600	4297800
P62717	Rpl18a	61712.6	64186.9	74752	4408300	5723600	5528200
P68254	Ywhaq	171872	212100	260190	4349100	4665700	4630500
Q9EQK5	Mvp	164070	106207	120007	4302400	3534500	3803000
P16045	Lgals1	169709	166397	166234	4194300	4510600	3511700
Q8BGQ7	Aars1	82037.3	80098.5	92008.7	4161100	3894400	4432000
Q99JY9	Actr3	66924.8	110551	87803.8	4147700	5138700	4317500
Q9CXW4	Rpl11	63386.9	47934.1	45698.7	4123500	4125400	4008400
P97377	Cdk2	13774.6	12312.9	14019.6	4118300	4084500	4170400
P46467	Vps4b	133317	168028	150480	4097400	4033100	4046000
Q61187	Tsg101	238598	238220	220053	4092700	4924400	7200800
P35980	Rpl18	132306	85034.4	99205.5	4061800	4045000	3937700
Q8R0J7	Vps37b	131172	83918.2	104192	3978000	4330100	4137500
P12970	Rpl7a	54039.4	59422.1	54201	3963900	3861700	4015800
Q6ZWY8	Tmsb10	33748.3	53106.3	46627.1	3935600	4054900	4464700
O88685	Psmc3	129574	148646	132423	3934200	3839100	4097000
Q07797	Lgals3bp	70190.3	128792	140352	3917000	1185100	1602800
P97315	Csrp1	17568.1	11600.4	15195.5	3912600	3946000	3908900
P26040;P26043;P26041	Msn	488319	509882	472390	3888800	3641200	4317900
Q9Z1Z2	Strap	22491	18210.4	16702.3	3849800	4520900	3906300
Q8BJU2	Tspan9	233758	236968	302095	3847400	3869800	3760200
Q9Z1Q5	Clic1	214539	220677	205586	3842300	3815900	3868200
Q9CPY7	Lap3	14289.2	20425.1	16109.4	3760300	3445300	3309500
P68373;P05214;P68369;Q9JJZ2	Tuba1c	930920	908110	877981	3752900	3671900	3548900
Q8K2Y3	Eva1b	74617.9	45304.5	82592.8	3732300	3554800	3556700
Q9WTM5	Ruvbl2	89856.4	90458.6	86280.5	3698100	3379800	3595000
P03975	Iap	0	0	0	3668400	3263000	3341000
Q8BG32	Psmd11	87921	85004.6	78200.2	3666000	4140100	4309800
Q6KAU4	Mvb12b	15146.4	25668.3	17607.9	3638700	4157400	3860100
P14824	Anxa6	70305.2	61734.4	61953.9	3630000	3474100	3710700
P17879;Q61696	Hspa1a;Hspa1b	134545	145360	128181	3609800	3469600	3848000
P68369	Tuba1a	0	0	0	3585400	3366200	3514500
Q9CZM2	Rpl15	66371.7	100589	85129.4	3577100	3846600	3943600
P47911	Rpl6	43884.9	38466.8	36478.3	3572300	3655800	3034700
Q3UAM9	Eng	0	0	0	3566300	2923000	3285800
P62192	Psmc1	55089.4	65153	58078.3	3484700	3330100	3516200
P62702	Rps4x	110874	75817.5	98059	3472000	2606600	4261800
Q9JLQ0	Cd2ap	29916.7	34646.2	34477.5	3457100	3217500	3155900
Q9CR26	Vta1	89473.8	87344.9	64552.1	3443300	2846200	2476300
O88325	Naglu	0	0	0	3435600	2962300	2826100
Q8BTM8	Flna	500650	556673	520388	3430600	5337800	3203000
J3QQ16	Col6a3	0	0	0	3424400	3393800	3373800
Q60605	Myl6	201843	180044	223584	3393700	3468200	3766200
Q8R2Y2	Mcam	5662.85	5824.62	530.077	3385800	2485400	3466200
P47963	Rpl13	100821	78407.1	91588.8	3351300	2967900	3038900
Q62465	Vat1	271467	193454	203642	3349000	3650500	3245600
Q64374	Rgn	50129	43642.8	39136.1	3341400	3331500	3317700
P62918	Rpl8	67581.4	58511	50069.3	3334900	3528300	3877500
P63276	Rps17	30312	30132.1	24598.9	3301500	3681400	2755200
P12815	Pdcd6	243573	184281	194979	3300600	2712200	3172500
Q8VDM4	Psmd2	60093.2	59941.4	51959.7	3278000	3829800	2796600
P54775	Psmc4	20364	33057.9	33241.9	3270000	3277100	3481900
P97857	Adamts1	4708.88	5059.13	4851.32	3229400	2073900	2881100
Q8R1B4	Eif3c	68633.3	71957.2	68344.7	3214600	3250800	3448700
Q99P91	Gpnmb	6677.24	39324.3	17705.2	3203300	3123700	2716200
Q9QZD9	Eif3i	34645.1	32903.7	34628.8	3187300	3161800	2954900
Q9D1G1;P62821	Rab1A	522065	388087	350414	3154600	3529400	3094400
P09103	P4hb	58070.1	47180	38181.4	3123400	2957200	3179800
Q8R1Q8	Dync1li1	29277.8	33443.7	27725.7	3106200	3061500	3191700
Q9WVL3	Slc12a7	17866.8	18315.1	18649.3	3026000	3226900	3477600
Q78HU3	Mvb12a	175232	156069	168189	3021200	2831400	2846900
Q60634	Flot2	17007.8	17279.7	18680.2	3013800	3047300	2903200
Q62351	Tfrc	145714	140492	136251	2998100	3206400	3000600
P27773	Pdia3	49592.8	36372.2	34463	2990600	2480000	2844300
Q9ERD7	Tubb3	0	0	0	2934700	3237000	3089000
Q91V41	Rab14	190620	232546	225277	2925800	2954500	2464200
P24668	M6pr	21642.4	20357.2	24789.9	2903400	2788200	2745700
Q8R105	Vps37c	69539.5	80331.6	64675.5	2874200	2853500	2899100
Q6ZWN5	Rps9	209055	197094	205341	2864800	2719600	2691700
O35474	Edil3	56372.6	68953.9	70660.6	2851400	2754100	2703500
P62960	Ybx1	0	0	0	2846800	2830300	2622100
P62137	Ppp1ca	41207.7	82733.8	76847.9	2805700	2410900	2285000
Q61292	Lamb2	16939.4	10445.9	12383.9	2802900	2597400	2087100
O55131	Septin7	33986.5	52437.9	49268.8	2796000	2701000	2781200
P61222	Abce1	30765.1	28676.5	31196.2	2781800	2477100	2367500
P53986	Slc16a1	568761	546359	514601	2768600	2701500	2826200
O70439	Stx7	62736.4	50111.5	52292.2	2763200	2703600	2869600
P61982	Ywhag	86609	115833	102766	2756600	2270400	2121100
P84096	Rhog	78102.7	89854.4	78782.8	2717600	3058800	2987400
P28474	Adh5	46335.8	62885.2	58949.8	2715800	2673000	2623900
P97370	Atp1b3	235532	217354	203744	2714700	3157200	3014300
P14131	Rps16	118497	95393.3	181845	2713800	2423900	3200600
O08917	Flot1	37071	36000.6	35034.6	2708400	2708900	2813100
P99027	Rplp2	43047.5	70167.7	66245.4	2704600	2819200	3423200
Q9CQD1;P61021;P35278	Rab5c	99649.6	135457	116194	2701900	2755000	2646300
Q9CZD3	Gars1	55859	52313.5	54800	2698800	2706900	2730900
P47962	Rpl5	69626.1	74728.4	62702.9	2630400	3253200	3661600
P28656	Nap1l1	222754	197036	185376	2628600	1846200	1698600
Q9JLJ2	Aldh9a1	38280.2	41542	42737.9	2607900	4016300	3586000
Q9Z127	Slc7a5	75049.7	87753.3	99245.3	2604100	2681000	2569900
Q8BP47	NARS1	100174	110725	106804	2598400	2366500	2191000
P61226	Rap2b	66328.7	50992.6	51485.7	2559300	2535200	2459000
Q9D8W5	Psmd12	41790.9	35217.4	39357.9	2526300	3003300	2735100
P62962	Pfn1	239100	280833	261215	2514500	2893300	2378900
P19253	Rpl13a	49872.5	58454.6	58069.4	2498900	2486000	2525300
Q07076	Anxa7	154407	101768	117146	2493500	2329600	2400700
Q8VCM7	Fgg	646623	653070	650280	2469600	2602700	2396100
O70318	Epb41l2	384525	372191	347190	2442600	2653300	2981100
Q61598	Gdi2	181578	174931	177076	2434200	2034500	1884300
P60764;Q05144;P63001	Rac1	570649	810862	675808	2434000	3065900	3324200
Q8BH35	C8b	0	0	0	2431000	2454700	2455300
P30412	Ppic	45895.5	40941.2	39959.9	2394700	2602400	2526400
Q9DBG6	Rpn2	3859.27	2581.59	4896.19	2393100	681890	876890
P97461	Rps5	46199.5	50923.2	43876.1	2388100	2399100	2944600
A2AN08	Ubr4	66969.8	69038	64857.4	2381700	3328700	2748100
P35564	Canx	14740.7	9935.74	18796.7	2365400	2292500	2166200
Q9CX00	Ist1	95103.8	104038	124851	2354100	2246200	2309800
P23591	Gfus	17465.3	27332.3	51315.1	2346400	1358100	2256500
P47753	Capza1	68651.5	56379.7	65615.4	2312400	2069800	2067900
P11440	Cdk1	58774.3	58681	58879.5	2307400	2232600	2302900
P62855	Rps26	7341.94	6295.56	5314.3	2270600	2449600	2430600
Q64514	Tpp2	20101.6	19721.2	19751.6	2257600	1607600	2268200
Q6P5F7	Ttyh3	25732.1	31293.2	20751.6	2240600	2199600	2421100
A2ASQ1	Agrn	12547.1	15301.3	11166.3	2234600	2198200	2171900
P47955	Rplp1	60852.7	53565.1	55545	2196800	2036000	2211000
Q8K021	Scamp1	7298.81	16553.5	7077.06	2193800	2806500	2624700
Q9WVE8	Pacsin2	60898.3	72854.8	64338.8	2173500	2974800	2676500
Q8QZY1	Eif3l	49487.4	47739.2	51395.8	2173500	2501800	1994900
Q64737	Gart	57590	51647.9	59625.9	2164600	1906800	1932100
P51912	Slc1a5	269878	241253	248750	2159500	2089100	2259500
P26516	Psmd7	27807.3	24914.3	30151.1	2153300	2180300	2495800
P23116	Eif3a	49059.4	51735.3	48157.8	2152300	2325000	1976400
P62301	Rps13	40032.9	62283.7	56718.6	2140800	2149400	1247100
P50516	Atp6v1a	62347.6	64019.8	63810.9	2114500	2266300	2004300
Q8BT07	Cep55	63003.3	74703.6	71308.1	2100000	1827300	898710
Q3TXS7	Psmd1	31145.4	45032.7	41207.5	2098800	2686700	2238500
Q9D0I9	Rars1	50077.6	47637.8	41989.8	2092800	2136400	2225200
Q8C0C7	Farsa	16209.4	19208.8	14365.8	2092100	1926100	1923600
Q8JZZ7	Adgrl2	24422.2	26015.2	27033.8	2080900	1806200	2060700
Q62159	Rhoc	0	0	0	2071900	2627700	1920100
P47856	Gfpt1	51042.9	56759	54259.6	2064500	1993700	1753700
O70475	Ugdh	44729.1	56630.9	48330.2	2053500	2096100	1956700
P62492;P46638	Rab11b	266569	274812	282259	2051200	2064200	2543600
O88487	Dync1i2	9458.04	13772.9	18398.5	2050400	2133700	2448200
Q6PDM2	Srsf1	156466	114740	129218	2048900	2128200	1887500
Q9CQT1	Mri1	16187.8	18822.7	13780.6	2046500	1432500	2147900
Q8CIE6	Copa	76041	74576.7	71228.6	2046200	2140300	2599600
P61979	Hnrnpk	32036.2	43724.2	42891	2025700	2329700	1880500
Q60790	Rasa3	147056	133513	137679	2005500	2158500	2110600
Q5SWU9	Acaca	35311.6	32037.2	36476.2	2005300	2157400	2254700
P57776	Eef1d	29957.2	41521.2	55062	2001700	2254300	2117300
Q61990;P57722	Pcbp2	216239	143261	183360	2000500	2036200	2054600
P16460	Ass1	166976	139019	141658	1989400	2341900	2356200
E9PV91	Adamts4	0	0	0	1988300	1957000	1904300
P42208	Septin2	63817.3	64451	73335.5	1974900	2000800	2399700
P83940	Eloc	32080.9	23465.5	22301.2	1963600	1742300	2082400
P35700	Prdx1	220540	156150	271001	1950600	1268100	1429900
P46935	Nedd4	48023.6	49170.5	46094.8	1932000	2000200	2016400
Q6P1B1	Xpnpep1	48566.4	44299.2	44889	1931500	2033800	1947500
Q6IRU5	Cltb	34477.7	26785.7	25696.2	1893200	2493400	1571500
Q9EPU0	Upf1	13841	15741.7	15766.8	1888500	1789700	2053200
P07742	Rrm1	56260.3	38523.8	48494.7	1881600	2165900	2212000
P08030	Aprt	116162	113864	92795.9	1866800	1306500	1831900
Q02788	Col6a2	956161	928553	969079	1851300	1918000	1869000
P61027	Rab10	56920.1	79516.3	72444.2	1819400	1695200	1808600
Q9WV60	Gsk3b	17793.2	18667.6	23710.7	1812100	1767800	1754400
Q8BK67	Rcc2	48204.2	36492.4	37268.7	1797600	1526200	1340800
P84104	Srsf3	24325.3	59473.6	65544.6	1796200	1752600	1823200
Q6ZWY3;Q6ZWU9	Rps27	80723.5	58032.8	60150	1792600	2238900	2485200
Q3TH73	Ttyh2	142470	149429	153930	1790100	2025900	2007600
P30999	Ctnnd1	79180.4	80473.2	71872.8	1789500	1406500	1608600
P55258	Rab8a	54652.5	47912.8	47307.3	1777200	1675600	1779200
O35737	Hnrnph1	88392.4	79709.8	76749.1	1768500	1503100	1663300
P31938;Q63932	Map2k1	23430.2	34338.1	32096.1	1757100	1021100	1372300
G5E829;Q6Q477	Atp2b1	165864	168412	175043	1731300	2393400	2050500
Q8VD75	Hip1	6637.29	10728.5	13354.2	1723600	1810100	1857100
Q8QZY6	Tspan14	87831.8	71492.2	72257.2	1715200	1748300	1801100
O08747	Unc5c	0	0	0	1712900	1482600	1119500
Q8CFE6	Slc38a2	234115	177587	192014	1692100	1778900	1831200
Q8R010	Aimp2	9295.64	9705.37	8194.36	1692000	1705400	1619600
Q07113	Igf2r	72944.9	71003.4	57046	1681900	1472800	1503600
Q8JZQ9	Eif3b	55641.2	63045.2	61197.6	1676300	1514700	1756300
O35375	Nrp2	92989.2	90936	97517.4	1673600	1500400	1783500
Q9EQP2;Q9QXY6	Ehd4	112923	93389.1	92749.7	1668700	1599900	2120900
A0A140T8T4	Rpl9-ps6	0	0	0	1661600	1535200	1768200
Q9CWF2	Tubb2b	0	0	0	1655900	1507500	1634800
Q60737	Csnk2a1	9505.69	13332.4	12921	1634000	1615200	2119400
Q3TWW8	Srsf6	49492	47908	38411.4	1633600	1669400	1666000
P84099	Rpl19	82364.6	75532.9	64189	1626200	1411600	1348000
P31230	Aimp1	20765.2	15226.6	17812.6	1624700	1432200	1430500
Q9WVM1	Racgap1	6627.87	9078.87	6308.51	1618300	1577700	1761200
Q91WS4;O35490	Bhmt	84557.7	65822.6	77631	1615700	1587700	1645000
Q99JI4	Psmd6	42250.4	65785.2	58444.4	1615400	1824200	1764100
Q9D0F9	Pgm1	149376	137979	144925	1604700	1417600	1260300
P83510;Q9JM52;P97820	Map4k4	67994.6	57412.3	52748.6	1599300	1535700	1474600
Q9WVJ2	Psmd13	49494.4	49609	48455.4	1577500	1395300	1492200
Q9QYB1	Clic4	28868.5	32673.6	38809.9	1554700	858630	1111600
Q68FL6	Mars1	39291.3	33855.3	29047.3	1540900	1799900	1620800
P47754	Capza2	98747.3	100176	90096.8	1530700	1683600	1662800
Q9CR57	Rpl14	71185.4	59362.5	60852.2	1508200	1017100	1526300
P21278	Gna11	80377.8	63838.9	66891.3	1506800	1529200	1039300
Q9D7S9	Chmp5	35314.2	31216.4	34371.4	1505800	1613200	1628100
P02468	Lamc1	51745.2	67664	72012.6	1504800	1091500	970880
Q6PB44	Ptpn23	40057.1	36234.3	45031.3	1485400	1071200	1031700
Q63844	Mapk3	33148.6	35715.8	32740.9	1482900	1315100	1592000
Q9ET01	Pygl	82034.6	82517.5	73752	1457400	1511500	1447900
P16254	Srp14	11579.6	14786.2	7290.99	1453800	1470300	1420100
Q9Z1R3	Apom	185359	175288	152128	1449100	1386700	1386200
O70133	Dhx9	13227.9	16316.1	13345.5	1444700	1521900	1674000
P18242	Ctsd	30161.3	15867.4	22616.4	1442400	1232900	1459000
O70194	Eif3d	39893.7	33593.6	29292.6	1424600	2264000	2248000
Q91YQ5	Rpn1	16127.4	16463.4	14718.1	1410400	1453300	1366200
Q9JIW9	Ralb	139739	147114	178496	1394500	1380700	1429900
P50580	Pa2g4	48556.1	43949.6	42388.1	1370400	1420800	1067500
P70398	Usp9x	46583.9	54948.3	48020.9	1365800	1412500	1128200
Q9Z1E4	Gys1	28735.3	27390.1	27217	1360400	1027300	985600
E9Q5G3	Kif23	4537.94	5392.12	7165.47	1358200	1159200	1478100
Q04736	Yes1	88447.4	132627	130832	1353400	1249700	874410
P39054;Q8BZ98	Dnm2	49083.5	52093.6	43835.7	1350300	1213500	1346600
P35979	Rpl12	48071.3	48367.7	53143.8	1341000	1467500	1071800
P35279	Rab6a	82133.5	138294	132770	1334300	1200700	1162300
Q05816	Fabp5	7737.07	5924.24	8006.97	1328900	1345500	1064900
Q9JJ28	Flii	17045.4	19779	13192.9	1327400	1251800	1015600
P60122	Ruvbl1	67847.6	76704.3	78547.6	1326300	1258700	1306900
Q9R0E2	Plod1	29747.6	32887.1	36246.8	1322300	1248400	1232000
Q3THS6	Mat2a	43690.7	32310.4	29025	1321500	1291000	1310900
P63330;P62715	Ppp2ca	114464	106938	110520	1314400	1090700	1134700
Q62167;Q62095;P16381	Ddx3x	63043.1	95430.5	89445.6	1310800	1762900	1510000
Q99J77	Nans	56404.6	51391.3	58380.9	1304900	1458600	1249500
P97333	Nrp1	79912.5	67995.9	73449	1303800	691820	1307700
Q3THG9	Aarsd1	20258.5	8102.55	8153.52	1294300	958810	1043400
Q61316	Hspa4	67830.6	68007.7	66265.7	1262000	1514300	1404800
Q91XW8	Fkbp6	0	0	0	1258700	1277400	1171600
Q62093	Srsf2	67162.6	36692.5	42334.3	1251600	1360900	1355700
Q8BH00	Aldh8a1	28944.6	34340.6	32213.5	1251200	1243500	1324600
P08207	S100a10	36083	27133.8	30726	1247400	1031600	1005900
Q9R0P3	Esd	82918.9	134762	123530	1243200	1227200	1291900
Q9Z1T2	Thbs4	162152	193751	201093	1239200	1324900	1275100
O35593	Psmd14	35562.8	41030.6	58373.5	1235100	1297400	1339900
P46735	Myo1b	29336.5	38277.5	39520	1230700	1317500	1130200
Q8BYA0	Tbcd	17147.8	14154.5	18719.3	1230600	794980	879120
O35598	Adam10	190660	134178	194613	1220600	1014700	1012500
P63005	Pafah1b1	90711	94836.6	86762	1216300	1259600	1258500
Q8CFI0	Nedd4l	24035.1	20742.9	22931.2	1213900	1068200	1008200
Q8BL97	Srsf7	70874.6	64379.7	68427.1	1212100	1265100	1309100
Q9DB34	Chmp2a	182884	119138	151725	1198400	861160	1165700
P26638	Sars1	60129.8	54816.3	55596	1195500	1132500	1422400
Q9ER00	Stx12	33901.3	31459.8	36199.6	1189200	1459000	1012900
Q91ZJ5	Ugp2	42708.9	44326.1	31096.2	1188000	962710	925170
Q9CQ80	Vps25	42655.6	84398.6	48991.3	1159500	1079200	1027400
P16627;P17879;Q61696	Hspa1l	305665	503911	472721	1156600	916610	896270
P14685	Psmd3	59386.9	60794.3	52515.2	1151100	1476600	1455000
Q8BH61	F13a1	191124	166269	181000	1150500	1154500	1087400
Q63844;Q61532;P63085;Q6P5G0	Mapk1	40129.3	57506.8	56528.9	1146400	644520	1024100
E0CX65	Sirpa	0	0	0	1145100	588320	969250
Q9CQ65	Mtap	161312	171826	141802	1137000	1494900	1563700
P54116	Stom	90533.7	107231	127139	1124200	990130	926290
P47226	Tes	13534.2	20958.4	13464.4	1121400	1207200	984410
Q8CI94;Q9WUB3	Pygb	80360.1	77027.3	83749	1119300	1164700	909630
Q8K2Q7	Brox	117193	105329	109815	1116500	1484700	1441800
Q9R1Q6	Tmem176b	68328.5	81427.3	81516.7	1113600	1125000	1092000
Q64430	Atp7a	35031.7	29414.3	32947.9	1111000	1104900	1143600
Q8CI32	Bag5	11863.7	12466.7	10815	1108000	1087000	1054600
Q80VP0	Tecpr1	4692.93	3936.74	3597.39	1107900	1118100	1440900
P28660	Nckap1	61723.2	60983.1	53070.3	1106200	982480	1117100
Q921F2	Tardbp	5685.58	4589.47	5757.96	1091900	1238100	1092600
Q9D1G1	Rab1b	20585.2	168491	66050.8	1090200	768710	816370
Q60973	Rbbp7	53138.8	46219.8	37456.2	1084600	968510	1409400
Q91WK2	Eif3h	19733.9	22353	16751.6	1078000	833620	843710
P50431	Shmt1	21712	22445.8	17777.8	1073100	1122200	1300000
P62996	Tra2b	10234	19199.3	22509.4	1067000	624590	1035700
P24369	Ppib	30448.8	23339.5	32347.9	1052400	1078800	1048400
P63242;Q8BGY2	Eif5a	49567.3	56898.5	53536.8	1048600	747130	921000
P70698;P70303	Ctps1	74396.5	79481.8	64940	1046700	1139500	1099500
P14115	Rpl27a	180911	159908	145239	1039000	1202100	1117100
Q6A0A9	FAM120A	24472.6	25926.2	26806.7	1039000	1852800	2187900
P19324	Serpinh1	52970.7	44434.4	47055.4	1022700	1126800	906250
Q9CZB2	Pmel	0	0	0	1020100	1357200	1334200
Q9Z2X1	Hnrnpf	12654.8	13912.1	12944.3	1019700	1041500	705350
Q8K094	Pvr	0	0	0	1014300	1009700	923840
P18654	Rps6ka3	59836.2	61702	60335.4	1009200	971340	781020
Q9DCL9	Paics	20987.5	39699.7	32097.2	987560	1005000	1053900
Q99PV0	Prpf8	13254.8	14698.2	12223.9	987350	712010	1395100
Q9EQH3	Vps35	30798.6	21682.4	25555.2	978500	1193300	1623700
Q9WUD1	Stub1	51458.2	46899.2	47269.6	975900	868140	819950
P47877	Igfbp2	87906.3	140556	125990	975600	956590	976290
Q9R0B9	Plod2	15303.4	16942.9	12881	974870	1257200	1303600
Q99JX4	Eif3m	13171.7	29005.2	28303.7	970410	898200	954030
Q8BML9	Qars1	17359.2	15293	13612.4	969180	1224000	1002500
P60229	Eif3e	101935	49911.8	65543.6	964290	771130	920080
Q9QXY6	Ehd3	245368	242979	246327	957500	851560	968140
P63323	Rps12	50990.5	63309.3	53814.3	952190	703720	915290
Q9ERD7;Q922F4	Tubb6	271071	172070	174956	951610	756910	736530
P70206;Q80UG2	Plxna1	38853	36105.3	36848.3	948140	960760	892460
P0C605	Prkg1	8739.04	6760.17	7124.24	943130	845240	555980
Q04857	Col6a1	1221420	1108130	1135050	929420	962070	937100
Q02248;Q02257	Ctnnb1	33363.8	38922.4	38149.8	920030	914630	933360
Q9QZF2	Gpc1	81045.6	79647.1	89201.6	919190	1190500	1216000
Q6PHZ2	Camk2d	28724	20452.9	23053.3	914240	923660	1105200
P48758	Cbr1	21142.2	33789.6	30504.8	913960	847580	811050
Q9WVA3	Bub3	35045.3	27281.4	31005.8	905640	867010	968360
Q61655	Ddx19a	12292.4	18089.5	14306.4	901430	780940	816720
Q9WV32	Arpc1b	18351.8	20742.5	15882.2	900180	912650	918560
P14152	Mdh1	88839.2	96878.7	91488.7	899610	980860	1002300
Q9QZI8	Serinc1	36652	38198.5	33128	896230	861810	872640
P63024	Vamp3	9744.14	10341.3	13618.6	890350	859650	910180
Q6P1F6	Ppp2r2a	62773	82347.1	72775	888570	1378400	1394600
P62082	Rps7	20206.2	18767.5	20076.7	886960	1202100	1282800
Q63836;P17563	Selenbp1;Selenbp2	17837.2	17140.8	11823.6	883800	888290	922310
P52293	Kpna2	48301.1	70665.2	69328.1	882540	832960	1008500
O55029	Copb2	55726	48979.7	42722.8	881830	888590	807800
O35609	Scamp3	10175.3	18163.3	13022.8	876580	1082100	1120500
P70168	Kpnb1	62717.6	65512.1	65717.2	872430	854680	1092100
P60867	Rps20	50918.8	43208.1	44813.5	872340	1361600	1138800
E9PVA8	Gcn1	33218.3	28111.4	28438.1	869730	780920	847920
Q80UG5	Septin9	80483	98801.4	91258.1	866490	676320	752670
Q99JR5	Tinagl1	730389	527587	672430	863300	912240	850330
Q9JM14	Nt5c	15105.5	38121.5	25291.7	856700	426150	881700
P62814	Atp6v1b2	26996.6	26646.1	23267.1	854990	978370	987250
P56395	Cyb5a	5093.01	7516.59	11259	850340	1107800	982710
Q8R180	Ero1a	5749.12	3463.32	4807.51	848800	990540	1004700
P55258;P61028	Rab8b	85232.4	78414.2	77074.5	845400	827390	770160
P09405	Ncl	38802.7	32191.6	32121.6	842390	671800	831640
Q3UPF5	Zc3hav1	48211.4	39688.6	40073.3	841700	1327400	886970
Q9DBZ5	Eif3k	44115.7	50680.9	56560.1	838930	961530	779020
Q9DCH4	Eif3f	25245.7	24029.5	24994.4	838600	1069800	938700
P62264	Rps14	18462.2	31495.5	27886.2	836030	706760	808100
Q6NZJ6	Eif4g1	43371.4	39163.5	33746.6	832310	820540	744550
Q6P9J9	Ano6	74900.6	58034.2	60750.8	830610	855670	858550
P97479	Myo7a	0	0	0	816940	891800	727190
Q4VAA7	Snx33	6033.84	3141.95	5263.19	816800	876880	751220
Q76MZ3	Ppp2r1a	96055.3	91375.4	87844.8	816120	1016500	1070900
E9Q414	Apob	430977	480243	475957	815540	780630	806270
P61255	Rpl26	63567.2	91480.1	80675.7	812930	1772900	2439300
P35282	Rab21	34058.5	28458.5	31367	812250	571480	471980
E9PZF0	Nme1nme2	0	0	0	810820	715740	310300
Q8CBW3	Abi1	38199.4	42491.3	43707.5	806330	672840	614960
P32883	Kras	233210	239270	222860	799620	1575300	763690
Q6PHU5	Sort1	0	0	0	795580	820660	878500
Q62433	Ndrg1	32754.5	36702.5	45720.6	794040	798800	817700
P40142	Tkt	25185.5	24465.4	16633.5	793400	395990	358700
Q6ZQ73	Cand2	4813.01	2343.32	5590.33	792210	764940	822460
P14211	Calr	16090.9	24769.5	37716.4	777900	958840	710220
O08848	RO60	50484.9	61990.1	59561.7	776260	863720	1053300
P24547	Impdh2	41586.6	58705.9	51195.8	776170	721880	554440
O09167	Rpl21	9216.29	19541.1	15032.7	771560	767840	713660
Q80UM3	Naa15	12964.1	13528.5	16452	770240	692220	949000
P26645	Marcks	8798.08	8085.98	10378	766930	708710	655940
P58021	Tm9sf2	56764.3	59241.7	53787.6	758840	777000	752070
Q9QZ06	Tollip	17877.5	19324.8	15528.6	757900	766940	826920
P17225	Ptbp1	8550.61	6952.39	6866.93	739080	659850	707980
O09044	Snap23	82210	56478.4	80591.2	732820	417280	676130
Q7TT50	Cdc42bpb	54197.2	55658.3	55810.1	731450	544560	564200
B2RXS4	Plxnb2	64271	75292	67568	714220	766940	769780
O08788	Dctn1	15532	14993.7	12992.6	711330	744270	565480
Q9JKF1	Iqgap1	61030.4	54159.9	49768.3	710530	786310	718880
Q61072	Adam9	44064.2	41315.7	37938.1	710410	717840	769880
Q9D6Y9	Gbe1	5973.43	4559.51	4358.55	710210	854360	751900
Q60864	Stip1	129418	120830	117252	709620	411950	2818300
Q9D7X3	Dusp3	0	0	0	709280	713230	604070
P08003	Pdia4	9878.4	7194.03	7450.91	687540	712350	670800
P97310	Mcm2	15088.6	15267.6	12675.4	682790	591000	630760
Q99JB8	Pacsin3	13306.8	16511.1	15573.9	681510	687790	738350
Q1HFZ0	Nsun2	20363.4	19204.5	15832	677410	694180	640380
F8VQB6	Myo10	25549.5	22076.7	22296.2	671160	619930	632330
Q6PHN9	Rab35	127209	118838	147872	667140	723170	650450
O55143	Atp2a2	14443.2	11754	14231.2	665220	621730	733370
P47857	Pfkm	20689.3	24226.6	18038.7	663220	512580	699180
P97927	Lama4	8846.71	13758.5	10197.3	658750	627680	646960
P70452	Stx4	63905.9	78363.8	52895.9	656350	703520	629360
P62835	Rap1a	151938	190547	209122	655310	677510	627320
Q91WG8	Gne	58675	47020	40271.8	653580	767150	786670
Q61656	Ddx5	80180.8	75366.3	73957	648750	572000	809110
Q61881	Mcm7	10039.1	19734.1	17628.2	646440	614890	818160
Q00612;P97324	G6pdx	52668.7	37002.2	42695.2	646260	580710	469170
Q91VC3	Eif4a3	42292.9	31944.5	37154.8	632860	750690	749360
O88572	Lrp6	20650.2	25379.1	19912.1	629040	2004200	1605300
O55222	Ilk	456258	382596	383389	627380	920090	659840
Q80SW1	Ahcyl1	90082.6	78622	86739	615260	427900	376870
O08810	Eftud2	24099.8	25336.7	20303.1	611500	746670	584720
P49717	Mcm4	14750.4	18079.9	17106.9	604090	375590	477820
P61164	Actr1a	21419.9	15295.1	17652	599790	653000	682770
Q3UHJ0	Aak1	18336.5	24610.3	17670.2	587530	598400	601700
P40749	Syt4	0	0	0	586650	392960	270660
Q3UPL0	Sec31a	26854.3	36535.7	28607.3	584260	724790	788310
B7ZMZ7	Dip2c	0	0	0	584080	377300	511420
Q9Z2U1	Psma5	45865.5	49685.9	49431.2	583160	614900	463500
P61021	Rab5b	18618.7	15734.5	16114.8	581910	505200	558180
O08709	Prdx6	187078	223321	206332	577470	934370	772380
P10605	Ctsb	77660.5	82178.9	71017.4	575540	402340	527570
O35226	Psmd4	16736.6	19594.5	28220.7	575370	298430	590880
Q8R1F1	Niban2	57016.1	54851.8	62656.4	567640	658420	528040
Q8VDJ3	Hdlbp	15844.5	16258.3	15864.2	566290	555430	607240
P23242	Gja1	172741	158184	150479	566060	588440	588240
P56480	Atp5f1b	25565.1	17404.3	16090	559910	294040	258420
P62889	Rpl30	9274.95	7110.41	7064.24	559440	554850	552980
Q91W50	Csde1	27366.2	29059.9	23242	556210	498370	555140
Q60875	Arhgef2	36067.8	40351.8	36723	552570	181210	74343
Q9CYL5	Glipr2	69000	48983.8	49781.2	550870	564380	581040
Q99M28	Rnps1	13331.2	7198.52	10027.9	548770	1038900	1146800
Q05D44	Eif5b	29299.2	29968.8	31648.1	535960	476580	573230
Q9Z1G4	Atp6v0a1	11896.8	13401.4	13319.3	530270	649530	614150
P32067	Ssb	17189.4	16609.5	13372.8	529250	535900	571830
P27661	H2ax	0	0	0	525400	745940	694220
Q9QZE5	Copg1	18604.6	17806.1	21616	523020	935990	533130
P63321	Rala	68106.6	80596.3	86944.5	521270	454870	479060
P61161	Actr2	59516.9	86012.9	75751.2	518300	510640	374510
P84089	Erh	8393.94	5057.39	9211.73	515950	429410	391750
Q8K3G9	Appl2	7782.27	3791.33	5320.27	514770	456760	486220
Q91W53	Golga7	78857.5	64689.4	57122.1	513890	515190	522960
Q9ERN0	Scamp2	3777.83	3408.84	6430.77	512950	490250	462760
P59999	Arpc4	121942	166784	180170	512700	518100	473370
Q922R8	Pdia6	14293.9	15817.4	16403.8	502890	467870	290480
P62245	Rps15a	63403.3	115686	115283	496980	1093200	764350
O35969	Gamt	0	0	0	496310	467310	485160
Q91XL3	Uxs1	20999.1	31702.9	26876.4	493720	524980	551920
P20352	F3	35662.4	43125.4	47261.9	492990	509620	466830
Q8BHZ0;Q921M7	Cyrib	55668	73997.6	61614.8	489790	481580	399460
P47757	Capzb	99215.3	117657	115920	478640	657500	603090
Q3UDE2	Ttll12	30112	34806.6	36445.2	476760	548350	503110
Q9QYI3	Dnajc7	27338.1	19553.8	25344.8	476740	659550	500950
O08688	Capn5	30962.4	33015.5	27744.1	476190	360370	438790
Q80U72	Scrib	33961.8	29206.5	23693.8	469800	516810	447120
Q8VEJ9	Vps4a	51277.1	51896.4	52279.1	465450	477050	424640
Q8CIB5	Fermt2	37164.4	35701.6	38050.2	459190	333700	396360
O89086	Rbm3	15715.4	13604.6	12942.1	456460	478160	425390
P10630	Eif4a2	47558.4	51709.6	55217.1	453680	522140	496580
Q8C6B2	Rtkn	0	0	0	453050	366510	397560
F8VQ29	Iqgap3	0	0	0	450670	486540	481630
Q91YR1	Twf1	20203	21228.2	21162.3	446130	444810	481830
P63168;Q9D0M5	Dynll1	23167.4	51248.7	44609.6	442640	453540	459970
Q99LF4	Rtcb	29291.7	24235.3	26493.7	442210	423480	134310
Q8CDN6	Txnl1	60645.1	73344	69436.8	441920	408980	420810
Q9CZ30	Ola1	38272.6	36902.8	33951.4	441790	359200	231480
Q9ERK4	Cse1l	50922.4	43617.3	48422.4	440300	363230	414620
D3Z2H9	Tpm3-rs7	0	0	0	440140	457530	584480
O55135	Eif6	37149.1	50702.7	44299	439500	307650	431740
Q64105	Spr	11302.3	11851.4	9523.54	434420	296190	437670
Q99104	Myo5a	13280.2	9943.21	10956.5	431080	467550	475660
Q80W68	Kirrel1	45293.1	45753.1	42007.1	429350	390950	426560
Q9Z0N1;Q9Z0N2	Eif2s3x	55156.2	47044.5	45623.3	429250	539410	540860
Q6P542	Abcf1	18386.5	16684.8	14122.3	429210	541920	451680
Q9D0E1	Hnrnpm	43710.4	41725.8	32040.2	428450	439100	327730
O88738	Birc6	17140.3	12773.3	11975.6	419660	449630	370890
P48193	Epb41	175615	140580	158167	417960	557600	456620
P25206	Mcm3	9677.94	14028	14157.9	416170	713600	557730
Q5DTK1	Chsy3	0	0	0	414740	364610	167180
Q91XD6	Vps36	24043.3	23945.1	24275	411400	405410	411310
Q99KF1	Tmed9	23634.7	26271.4	18507.6	411330	411030	376890
B2RXV4	Flvcr1	21841.4	21344.8	15626.8	409740	434250	423410
P21279	Gnaq	310455	342628	340211	408940	437540	428180
P61205;P84078	Arf1;Arf3	3035.71	2005.96	6515.72	407330	1012300	859230
P26043	Rdx	40913.6	40945	35697	398750	467920	449130
Q6P4T2	Snrnp200	24279.3	30353	23288.2	397240	290130	504310
Q99JW4	Lims1	169697	159819	157928	396370	435470	432970
Q64324	Stxbp2	19154.9	16845.9	16647.5	393380	373380	397060
Q9ERG2	Strn3	21365.6	26513.9	25381.1	389370	522070	496620
P40124	Cap1	90426.8	86019	71140.1	387620	437400	411810
O88413	Tulp3	14528.3	11154.5	11530.6	386980	523080	444170
F2Z4A3	Fat1	0	0	0	384200	516670	512630
Q7TMB8	Cyfip1	93160.5	92704	87906.5	380800	1037700	903480
P30285	Cdk4	2614.43	2003.89	3819.69	380370	272560	390610
Q5SQX6	Cyfip2	5208.45	5109.04	7063.18	378680	342370	388030
Q64727	Vcl	253115	221924	220293	378240	489110	504960
Q8R5C5	Actr1b	25610.7	22961.7	27640.6	365600	350220	289860
Q99K85	Psat1	205224	246042	220410	363090	649120	377130
Q8VDV8	Mitd1	8331.34	6528.76	4177.28	362670	334460	318600
Q7TPV4	Mybbp1a	31610.6	39275.7	25357.4	359430	301220	412310
Q9WVG6	Carm1	41742.8	28154.8	37252	357740	364770	354040
Q5SUR0	Pfas	19478.8	24214.6	17748.2	356170	399260	325400
Q8BJY1	Psmd5	18285.6	20944.1	20376.9	353730	354230	346060
P27601	Gna13	496744	422621	501884	348790	353800	291720
P35802	Gpm6a	13540.3	23399.6	9808.71	347450	359310	346440
Q80T21	Adamtsl4	7444.87	6378.76	7805.67	347200	360500	355150
O08547	Sec22b	53551.9	139658	134512	347180	509770	333980
Q8K1M6	Dnm1l	25988.6	29637.7	26956.2	339650	255750	239920
Q61301;P26231	Ctnna1	64606.9	59481.5	59709	338690	331310	363690
Q924C1	Xpo5	11141.7	15959.3	16001.8	337970	286330	331970
P10493	Nid1	256994	293726	291882	337340	386110	302910
Q9QZW0	Atp11c	16737.4	16010.3	10393.4	336210	304990	336500
Q9WUM4	Coro1c	46869.6	52519.3	36568.2	332480	437500	133450
P17156	Hspa2	31680.1	67606.2	73151.9	327150	420850	248060
Q9JJK2	Lancl2	13884.1	11611	14431.2	322880	274280	402640
Q921H8	Acaa1a	0	0	0	321580	243010	290310
P28658	Atxn10	20256.9	18517.8	19933.4	316980	457190	496700
Q99KJ8	Dctn2	25824.6	23810.4	18322.6	313250	409280	229810
Q9D1D4	Tmed10	9530.28	10187.8	10694.1	312380	518820	289700
Q80UY2	Kcmf1	18251.8	27722.8	29872.8	311730	245350	233920
Q8CGY8	Ogt	20717.5	20115.4	21452.9	310800	357010	335250
G5E895	Akr1b10	0	0	0	310320	350170	258910
P49312	Hnrnpa1	30754.4	37948.8	49174.8	304430	336180	232690
Q9JM52	Mink1	6054.29	9971.15	19930.5	303660	322940	321680
Q9CQ26	Stambp	10663.9	13703	8539.02	301480	443110	268360
Q6ZQ38	Cand1	60759.4	64441.1	49832.9	301150	255870	530730
Q91VR5	Ddx1	13875.4	15031.7	16419.3	297850	354420	365850
Q810B6	Ankfy1	11902	20408.5	14404.4	291650	448080	357340
Q9JKR6	Hyou1	26680.8	24851.5	25617.9	289060	259370	285810
Q91W90	Txndc5	9952.82	4056.43	4559.15	288230	283500	192860
Q3UDW8	Hgsnat	12480.8	1971.35	9355.1	279970	322270	307740
P31324	Prkar2b	11206.4	30235.6	28074.2	279800	297550	274360
Q01320	Top2a	14798.3	13495.2	14760.4	274050	355580	381970
Q68FH4	Galk2	11689	16799.5	12983.7	269980	298350	309800
Q8VDZ4	Zdhhc5	33521.6	35789.4	28530.1	269190	282370	289660
Q6P5F9	Xpo1	52585.9	58132.3	63100.4	268720	165570	154920
Q99MN1	Kars1	28519.2	22474.2	23775	267520	733570	527050
Q3TW96	Uap1l1	39039.7	31958.1	47537.8	262030	232050	252210
Q5XJY5	Arcn1	18891.2	17341.5	12637.3	259500	333980	330320
Q9WVA4	Tagln2	108274	270360	128163	254740	252790	257830
P70699	Gaa	12790.6	20079.6	12837.5	252490	261890	294960
P41241	Csk	14041.8	11601.5	10820.8	251470	414890	533950
Q3UH93	Plxnd1	16874.1	15625.8	15667	247610	321230	378800
O88746	Tom1	26942.1	26567.2	28936.7	244080	458750	225760
O08529	Capn2	39679.6	45249	33381.9	243890	148120	202700
Q8K0C9	Gmds	25592.2	17681.7	19267.4	243270	232650	220280
Q5SRX1	Tom1l2	16895.5	6579.63	9007.63	242560	273270	225100
O88447;O88448	Klc1	24677.8	18052.7	19648	236370	173180	195210
B0V2N1	Ptprs	7329.02	6521.95	6062.25	236150	448030	1279900
Q08943	Ssrp1	14207.5	10992.9	9740.86	235180	279080	257690
Q6X893	Slc44a1	126565	161402	113990	232060	257760	249080
Q8BZ20	Parp12	15762.2	13006.7	13602.1	232000	268810	268790
O35379	Abcc1	26021.3	23173	23948.4	228510	294620	214980
P26040	Ezr	62071.8	65347.9	66729.9	228440	218080	149950
P57780	Actn4	40376.8	50506.7	43674.6	226850	199610	204360
Q9CR51	Atp6v1g1	8797.29	6223.87	6931.96	219200	811250	526430
Q921G8	Tubgcp2	6619.15	6486.16	9155.06	215020	172550	243050
Q8CI59	Steap3	27603.3	19129.1	17649.4	214200	192300	205300
O88322	Nid2	116414	140412	129710	213890	190480	214510
Q8C669	Peli1	0	0	0	210690	213240	190580
Q8R1A4	Dock7	12685.7	17914.3	13531.8	208770	209740	153510
Q99KP6	Prpf19	29044	29860.6	28374.9	206460	193290	189810
Q8K1A6	Cc2d1a	29531.2	22499.8	22469.4	205850	199460	236570
Q9D1M4	Eef1e1	0	0	0	205010	182130	215270
E9Q175	Myo6	0	0	0	204450	182720	285940
Q91VH2	Snx9	203431	218506	202718	202430	285790	230000
Q01149	Col1a2	77450.2	147133	156365	195370	216470	225190
P63038	Hspd1	16092.3	15776.1	8844.51	195230	187800	151090
Q9DBG3;O35643	Ap2b1	62982	52359.1	58198.2	189640	167310	43019
Q9R1C7	Prpf40a	4900.04	2682.52	3391.11	189420	115490	184860
P97311	Mcm6	12188.8	19568.1	29932.7	188610	121130	172580
Q99LJ0	Cttnbp2nl	0	0	0	188370	236350	293630
O55106	Strn	36121	37302.8	32827.7	185730	218840	173630
O89051	Itm2b	15215.1	15583.3	15217.1	182190	200290	209450
Q6PAR5	Gapvd1	22869.3	17994.2	18333.1	178030	159700	188820
Q62448	Eif4g2	18624.3	19627.9	19032.2	166240	96028	129430
Q60715	P4ha1	16885.1	20457.4	18613.5	164010	145700	161360
Q9Z0S1	Bpnt1	7326.78	12200	9290.29	161830	238080	190730
Q62418	Dbnl	3668.05	9699.47	7170.23	160660	250510	168360
Q61553	Fscn1	42948.1	42572.3	81458.3	160600	154460	146170
P11152	Lpl	30457	28380.9	28660.4	157590	166040	101240
O54833	Csnk2a2	14999.4	14553.1	13927.3	156690	145480	160050
Q8VEH6	Cbwd1	7834.14	7560.93	13885.5	156610	174430	117950
Q8K354	Cbr3	13929	23872	24714.2	155670	185470	225620
Q6IQX7	Chpf	6627.64	6358.27	7682.93	149610	150400	131060
Q9QXB9	Drg2	47550.2	36975.6	35383.5	148770	182720	147730
Q7TMY8	Huwe1	36804.5	39030.4	29702.6	148690	88472	100280
Q9DBY8	Nvl	11099.4	19640.3	10511.8	147320	129740	114970
O70310	Nmt1	10043.5	22358.5	24911.6	145520	163060	151590
P17427;P17426	Ap2a2	51466.5	45410.3	41594.2	143980	175540	145760
Q61543	Glg1	28005.5	26137.8	30238.4	143050	152680	161010
Q9JIM1	Slc29a1	72685.8	82528	103090	140210	131930	152540
P97855	G3bp1	8546.36	4857.37	7481.96	139310	263450	233930
Q80ZX0	Sec24b	0	0	0	135280	69133	69352
Q9Z1F9	Uba2	7179.83	10921.5	6739.46	134030	156090	68994
P29387	Gnb4	38457.6	28035.8	36167.2	126940	131880	141950
Q8BMA6	Srp68	17046	7254.31	11359.5	125710	252670	264870
Q9Z2A0	Pdpk1	5193.27	5040.04	4264.65	113110	147730	147140
Q6PDI5	Ecpas	23433.5	22048.5	20287.1	108510	95857	132930
Q8BKC5	Ipo5	64345.9	57681.5	50990	96161	66741	103450
P51807	Dynlt1	0	0	0	81746	97686	94421
P17918	Pcna	27321.8	23029.2	37240.1	80660	117140	302510
Q61699	Hsph1	73011.2	64927.5	65884.1	74759	73372	97944
Q9Z0U1	Tjp2	10627.3	8742.72	7500.05	35911	93018	75721
P02088;P02104;P02089	Hbb-b2	6958220	10385100	10419900	0	0	0
Q6GQT1	A2m	5428760	5724550	5584640	0	0	0
P07724	Alb	4686290	4049750	2979350	0	0	0
Q61703	Itih2	4127510	4445190	4300200	0	0	0
Q61838	Pzp	4123900	3961850	3834860	0	0	0
Q5U405	Tmprss13	2910830	3132540	2347420	0	0	0
P28666;P28665	Mug1	2321540	1570360	2271390	0	0	0
P29699	Ahsg	2075380	1925370	1975540	0	0	0
Q00623	Apoa1	2042940	1610610	1526430	0	0	0
P10085	Myod1	1950300	1529530	1498200	0	0	0
Q9R118	Htra1	1808380	1585590	1897850	0	0	0
P01027	C3	1570180	1775390	1527010	0	0	0
P01029	C4b	1564790	1490750	1402960	0	0	0
Q9QUM0	Itga2b	1493620	1238930	1289030	0	0	0
P35441	Thbs1	1427610	1199600	1331440	0	0	0
P20918	Plg	1101130	872611	987706	0	0	0
Q8BFZ3	Actbl2	1076190	734834	818087	0	0	0
P32261	Serpinc1	1073390	927301	1077400	0	0	0
P02104	Hbb-y	1014300	887341	988306	0	0	0
Q08761	Pros1	890649	232891	915214	0	0	0
O88783	F5	879066	1036470	1030640	0	0	0
P10639	Txn	839378	580705	462723	0	0	0
P06467;P01942	Hba	805746	1142850	1459230	0	0	0
Q91W10	Slc39a8	789432	16816.6	801465	0	0	0
Q8K0E8	Fgb	703527	498306	608702	0	0	0
P57787	Slc16a3	633203	775352	671503	0	0	0
P68134;P62737;P68033;P63268	Actg2	620757	544795	420808	0	0	0
Q9Z0T9	Itgb6	548219	430096	442302	0	0	0
Q61646	Hp	535450	407761	407189	0	0	0
O88947	F10	523817	321973	330110	0	0	0
A6X935	Itih4	522267	653571	550970	0	0	0
Q61704	Itih3	521823	499329	551095	0	0	0
A2AQ07	Tubb1	500152	612869	552040	0	0	0
P13020	Gsn	499550	582150	508721	0	0	0
P02535;Q9Z320;Q8VCW2;Q9Z2K1;Q61414;Q61781	Krt10	455992	412059	328635	0	0	0
O70401	Tspan6	445291	370505	342325	0	0	0
P04186	Cfb	444191	291835	367929	0	0	0
P08121	Col3a1	438216	360308	369404	0	0	0
P08122	Col4a2	417184	381032	428156	0	0	0
O35316	Slc6a6	415094	458738	475237	0	0	0
Q03350	Thbs2	369286	395704	426536	0	0	0
P07091	S100a4	363182	293108	391964	0	0	0
Q01339	Apoh	358293	250106	267316	0	0	0
Q08879	Fbln1	357271	521058	214071	0	0	0
Q9Z0K8	Vnn1	356310	321911	308571	0	0	0
P82198	Tgfbi	356087	358848	348598	0	0	0
Q9D125	Mrps25	352519	1653450	1341330	0	0	0
O89020	Afm	339596	318501	315491	0	0	0
Q9CRB5	Prl7c1	333424	510561	339895	0	0	0
P16125	Ldhb	323622	240811	295209	0	0	0
P62746;Q9QUI0;Q62159	Rhoa	315882	554318	495390	0	0	0
O54890	Itgb3	314701	332009	324025	0	0	0
Q9WV91	Ptgfrn	290533	325322	328267	0	0	0
Q3UQ28	Pxdn	266599	283581	253936	0	0	0
P17515	Cxcl10	260320	169053	173476	0	0	0
Q64253	Ly6e	258618	387969	366265	0	0	0
P09535	Igf2	250132	77396.7	170676	0	0	0
P62331	Arf6	247112	304860	344114	0	0	0
Q00724	Rbp4	245138	157618	181247	0	0	0
Q923D2	Blvrb	243236	147975	149712	0	0	0
Q921I1	Tf	239667	138616	154505	0	0	0
Q07968	F13b	235438	262576	235725	0	0	0
Q61398	Pcolce	228851	175044	189560	0	0	0
P62071	Rras2	228480	200544	234217	0	0	0
P19221	F2	227976	527667	457824	0	0	0
O35639	Anxa3	226203	183954	208864	0	0	0
P04104	Krt1	225650	660073	141063	0	0	0
Q8CF98	Colec10	222983	197565	206228	0	0	0
O35385	Ppef2	222132	174887	174207	0	0	0
P61205;Q8BSL7;P84078	Arf2	221316	269784	274315	0	0	0
Q8K1B8	Fermt3	218426	215914	227400	0	0	0
P34884	Mif	217920	193757	206234	0	0	0
P40237	Cd82	216947	155196	162085	0	0	0
P62270	Rps18	215998	187868	172824	0	0	0
P39876	Timp3	213661	241640	225848	0	0	0
Q9JLZ6	Hic2	207190	2297210	1413930	0	0	0
P62141	Ppp1cb	202458	235919	224642	0	0	0
O35566	Cd151	196609	105430	128675	0	0	0
P05622	Pdgfrb	195643	193240	181418	0	0	0
P15379	Cd44	192705	246737	263884	0	0	0
P97300	Nptn	192703	58854.9	51339	0	0	0
Q64302	Tm4sf1	189961	150857	177321	0	0	0
Q03145	Epha2	188794	176308	178740	0	0	0
P35288	Rab23	183452	213467	224461	0	0	0
P01897;P01899	H2-D1	182009	211559	209465	0	0	0
P11087	Col1a1	181737	169139	187897	0	0	0
P14069	S100a6	177029	121701	130758	0	0	0
P05480;Q04736;P39688	Src	175705	252308	256121	0	0	0
Q8CJ26	Nradd	168327	461697	458829	0	0	0
Q9Z1F6	Cnmd	166088	144284	133703	0	0	0
C0HKE2;C0HKE3;C0HKE6;Q8BFU2;Q8R1M2;Q8CGP7;C0HKE4;Q8CGP5;C0HKE5;C0HKE1;Q6GSS7;C0HKE9;Q8CGP6;C0HKE8;Q64523;C0HKE7	H2ac11;H2ac12;H2ac13;H2ac15;H2ac4;H2ac6;H2ac7;H2ac8;H2aj;H2aw;Hist1h2af;Hist1h2an;Hist1h2ao;Hist1h2ap	165443	249929	178145	0	0	0
P51885	Lum	164022	161485	166266	0	0	0
P21995	Emb	160238	209203	208036	0	0	0
P68510	Ywhah	159035	313610	296565	0	0	0
Q9QUM9	Psma6	157610	114566	134098	0	0	0
Q9QZS0	Col4a3	157516	169249	186936	0	0	0
Q60963	Pla2g7	157416	141429	150689	0	0	0
Q9CQW9;Q99J93	Ifitm3	156964	509044	646465	0	0	0
O54962	Banf1	156558	392134	256628	0	0	0
Q8K211	Slc31a1	155584	162249	156820	0	0	0
P84084	Arf5	153820	177280	167698	0	0	0
Q60994	Adipoq	153688	126522	158836	0	0	0
Q91V12	Acot7	152712	150431	147822	0	0	0
Q921E2;P35285	Rab22a	152118	128155	136950	0	0	0
Q9DBE0	Csad	146375	133546	166230	0	0	0
P07214	Sparc	146166	117496	104920	0	0	0
Q9QZC7	Plekhb2	144581	129207	117617	0	0	0
O88456;Q9D7J7	Capns1	143161	115000	115777	0	0	0
Q61508	Ecm1	142514	165191	124015	0	0	0
Q8C176	Taf2	141186	154961	116589	0	0	0
P29533	Vcam1	140097	133899	117647	0	0	0
Q9JHH6	Cpb2	139699	112273	129593	0	0	0
Q9ES46	Parvb	139187	94917.6	97499.9	0	0	0
Q8BKX1	Baiap2	138552	107626	97929.5	0	0	0
P13595	Ncam1	137785	149398	149098	0	0	0
Q924C6	Loxl4	137641	151720	143892	0	0	0
Q99LX0	Park7	136969	134366	108253	0	0	0
P83882	Rpl36a	136806	82719.9	84527.2	0	0	0
P97298	Serpinf1	136204	113672	126902	0	0	0
Q3THE2	Myl12b	135089	114636	151004	0	0	0
O88207	Col5a1	134839	125238	134752	0	0	0
Q9QZH3	Ppie	133159	31845.6	122631	0	0	0
Q99LU0;Q9CQD4	Chmp1b1	130162	207367	210904	0	0	0
Q6WVG3	Kctd12	129759	111539	120025	0	0	0
O08710	Tg	128343	190993	204052	0	0	0
Q922U2	Krt5	128165	210978	144894	0	0	0
Q9R098	Hgfac	128126	76185.1	88495.7	0	0	0
Q6IFX2	Krt42	127661	144738	129276	0	0	0
Q01768	Nme2	125802	242469	285939	0	0	0
P10833	Rras	124091	143287	116555	0	0	0
Q9CQ79	Txndc9	123983	197005	18696	0	0	0
Q9DB05	Napa	123181	105851	105071	0	0	0
Q9Z1X2	Ptdss2	122235	114617	109367	0	0	0
Q9WTR5	Cdh13	121093	108963	116041	0	0	0
P28301	Lox	120685	114253	117601	0	0	0
P16301	Lcat	120679	166435	149589	0	0	0
Q9CQX5	Cldnd1	120534	97905.8	93459.8	0	0	0
Q80XL6	Acad11	119633	110675	108335	0	0	0
O89029	Matn4	118333	337596	319397	0	0	0
Q99LD8	Ddah2	118095	106254	83825.8	0	0	0
Q8BM86	Lhfpl6	117147	103747	99500	0	0	0
A2APV2	Fmnl2	116810	93772.5	101826	0	0	0
O09131	Gsto1	116347	89540.2	91179.3	0	0	0
Q9DCD0	Pgd	115635	179244	145820	0	0	0
P15327	Bpgm	115033	89191.7	90521.1	0	0	0
P62858	Rps28	113795	55519.6	69828.7	0	0	0
Q6ZPE2	Sbf1	110616	126837	107654	0	0	0
P02469	Lamb1	110427	112964	111423	0	0	0
O70423;Q812C9	Aoc2;Aoc3	110242	298426	291194	0	0	0
Q9WVM6;P98063	Bmp1	110207	89594.6	98719	0	0	0
P47964	Rpl36	107640	75282.7	69544.3	0	0	0
P46460	Nsf	106951	81055.8	99761.8	0	0	0
Q8R422	Cd109	106399	98853.9	101549	0	0	0
P62852	Rps25	104843	94157.7	102377	0	0	0
P09528	Fth1	103958	128642	133238	0	0	0
Q9R1B9	Slit2	103824	94010.2	93699.5	0	0	0
P24270	Cat	103244	140399	100428	0	0	0
Q62009	Postn	102824	94693.3	98238.7	0	0	0
Q8VCS0	Pglyrp2	101409	82459.8	86287.4	0	0	0
Q9DCK3	Tspan4	100756	74725.8	90857.9	0	0	0
Q8BHN3	Ganab	97746.4	102785	93229.8	0	0	0
Q60847	Col12a1	96956.5	80064.5	81483.3	0	0	0
P06684	C5	96104.4	61480.9	69480.5	0	0	0
P53994;P59279	Rab2a	95619.9	109823	94219.7	0	0	0
Q9QUJ7	Acsl4	95272.5	98528	98953.9	0	0	0
Q9JLB0	Pals2	94901	96861.5	94960.7	0	0	0
Q3TTY5	Krt2	94213.6	115098	75749.7	0	0	0
Q9R1P0	Psma4	93553.5	90581.1	94404.6	0	0	0
Q64674	Srm	93463	80505.8	81451	0	0	0
P11352	Gpx1	93378.2	82989	39063.8	0	0	0
Q60631	Grb2	92919.3	87433.3	76329.8	0	0	0
Q8R001	Mapre2	92215.5	66218.9	74291.6	0	0	0
Q8C166	Cpne1	92032.8	82379.6	80365.4	0	0	0
Q8R4V5	Oit3	91694.6	82502.1	84994.3	0	0	0
Q8R143	Pttg1ip	91682.9	76552.2	81769.6	0	0	0
Q7TPR4	Actn1	91638.6	91006.1	91470	0	0	0
P34022	Ranbp1	91055.7	78104.3	62846.3	0	0	0
Q6P069	Sri	90855.5	98098	94848.4	0	0	0
Q8R121	Serpina10	90733.4	81763.6	76277.6	0	0	0
P25785	Timp2	90730.3	69694.2	70695.8	0	0	0
P06800	Ptprc	90591.7	84203.7	86881.6	0	0	0
Q9CX86	Hnrnpa0	90459.4	87926.4	65004.5	0	0	0
Q64735	Cr1l	90296.7	78788.1	90503.6	0	0	0
Q8BH64	Ehd2	89980.6	99507.2	91258.9	0	0	0
Q8R1K1	Ubac2	89570.3	167868	165461	0	0	0
Q9Z175	Loxl3	89313.7	74418.6	72717	0	0	0
Q99PF4	Cdh23	88057.9	19139.3	36297	0	0	0
O08807	Prdx4	87985.9	151341	154023	0	0	0
Q8BHL4	Gprc5a	86730.3	65527.8	83997.7	0	0	0
P63325	Rps10	85754.9	57071.5	51583.1	0	0	0
Q8BPB0;Q921Y0	Mob1a;Mob1b	85613.5	73123.1	63327.1	0	0	0
P45700	Man1a1	84927.8	42644.4	27289.2	0	0	0
A2AL36	Cntrl	84891	29015.7	26087.6	0	0	0
P55012	Slc12a2	84303.8	90136.3	85387.2	0	0	0
O88844	Idh1	84241.6	66697.6	72969.5	0	0	0
P25911	Lyn	83643.4	54298.8	61269.5	0	0	0
Q99LJ1	Fuca1	83628.5	83348.8	73702	0	0	0
P63213	Gng2	83358.4	67990.4	63348	0	0	0
P23492	Pnp	83258	83018.3	79507.4	0	0	0
P63028	Tpt1	83212	137540	119141	0	0	0
P28571	Slc6a9	82342.7	73166.6	67474.1	0	0	0
P10400	Pol	82111	86066.8	98302.4	0	0	0
Q6ZPF4	Fmnl3	81181.7	67017.1	69815.7	0	0	0
P70349	Hint1	81093.5	100341	76239.7	0	0	0
Q91XS1	Mtmr4	81011.3	86850.9	87291.6	0	0	0
Q99P72	Rtn4	80355.7	55678.4	54979.6	0	0	0
P18052	Ptpra	80075.6	65450.5	79050.5	0	0	0
P47879	Igfbp4	80029.3	94902.6	76977.9	0	0	0
P11688	Itga5	79409.8	92399.3	104830	0	0	0
P29391	Ftl1	79375.6	112675	148022	0	0	0
O09106	Hdac1	78937.9	70094.7	62297.6	0	0	0
Q8R2Q8	Bst2	78438.7	63111.9	46472.1	0	0	0
P20444;P68404	Prkcb	76355.3	65721.6	62755.4	0	0	0
Q9CZE3	Rab32	76223.9	67156.5	74470.5	0	0	0
Q9DD03	Rab13	75754.1	65248.8	57803.1	0	0	0
O88952	Lin7c	75633.6	82354.6	55534.2	0	0	0
P33434	Mmp2	75631.2	57953.2	67981.4	0	0	0
Q06138	Cab39	75281.9	65430.5	56447.3	0	0	0
Q9R0G6	Comp	75076.4	98416.6	108098	0	0	0
Q8C0E3	Trim47	74813.4	96911.8	75661.6	0	0	0
Q9WVJ9	Efemp2	74439.6	62764.6	71311.9	0	0	0
P36536	Sar1a	74259.1	17740	31108.5	0	0	0
Q9JKZ2	Slc5a3	73659	72455.4	84197	0	0	0
Q64314	Cd34	73004.3	114722	103640	0	0	0
Q6PGH0	Ubtd2	72622.4	66939.9	71723	0	0	0
Q9DBT5	Ampd2	72032.1	74787.8	89206.7	0	0	0
P21107;P58771	Tpm1	71872	118037	90310.3	0	0	0
Q8VCJ6	Mrgprf	71573.7	43426.3	59157.9	0	0	0
Q61233	Lcp1	71253.4	59562	51626.9	0	0	0
P60521;Q9DCD6;Q8R3R8	Gabarapl2	71245.7	213172	161260	0	0	0
P97447	Fhl1	71228.3	76373.4	74378.7	0	0	0
Q8BTY2	Slc4a7	70868.3	74543.1	75309.2	0	0	0
Q9Z1N5	Ddx39b	70749.2	60890	59258.8	0	0	0
P15116	Cdh2	69998.4	71247.2	64820.8	0	0	0
Q99L47	St13	69874.7	54677	56818.1	0	0	0
Q8BNY6	Ncs1	69328.4	77954.9	87317.1	0	0	0
O08746	Matn2	69154.3	62251	70978.5	0	0	0
Q80ZJ1;P61226;Q8BU31	Rap2c	68643.6	106324	89752.3	0	0	0
P06797	Ctsl	68208	48634.8	39321.1	0	0	0
Q64008	Rab34	68029.1	77940.7	85835.8	0	0	0
Q8K023	Akr1c18	67942.1	73965.1	70883.7	0	0	0
O09173	Hgd	67902.3	62532	57901.7	0	0	0
Q9CVB6	Arpc2	67641	59245.6	70706.6	0	0	0
P61082	Ube2m	67375	38428.8	48250.9	0	0	0
P67984	Rpl22	66811.1	77944.7	77894.8	0	0	0
Q60841	Reln	66512.4	57569.9	61994.9	0	0	0
Q60770	Stxbp3	65862.7	62330.4	59992.1	0	0	0
Q00493	Cpe	65506.2	63273.3	61323.5	0	0	0
Q9D2M8;Q9CZY3	Ube2v2	65472.9	73046.2	83733.5	0	0	0
Q8K009;Q8R0Y6	Aldh1l2	65208.3	156292	150375	0	0	0
P45377	Akr1b8	65124.3	35530.7	43976.5	0	0	0
P21447;P06795	Abcb1b	64822.4	108696	88046	0	0	0
P28271	Aco1	64189.3	43980.5	60933.1	0	0	0
Q9ES97	Rtn3	63596	46230.4	45571.9	0	0	0
Q8BK62	Olfml3	63469.7	62451	52485.9	0	0	0
Q8VEH3;Q9CQW2	Arl8b	63427.2	120669	72534.8	0	0	0
Q8BT60	Cpne3	63406.6	40346.8	51586.1	0	0	0
Q8BP67	Rpl24	63351.3	70080.5	53458	0	0	0
P55264	Adk	63150.5	62565.5	44292.3	0	0	0
Q69ZN7	Myof	62880.3	65770.4	59755	0	0	0
P58242	Smpdl3b	62778.7	54252.4	50934.6	0	0	0
O89053	Coro1a	62770	38897.9	43697.3	0	0	0
Q9D358	Acp1	62685.3	58357.1	57510.7	0	0	0
P00687;P00688	Amy1	62600.3	74950.8	65305.4	0	0	0
Q80YX1	Tnc	62101.4	87916.2	71019.2	0	0	0
Q9R0P5	Dstn	61907.5	79814.5	77258.2	0	0	0
P62900	Rpl31	61904.2	59841.8	60665.6	0	0	0
P56873	Znrd2	61856.8	52370.8	34563.4	0	0	0
Q61470	Cd37	61670.6	44447.8	53362.5	0	0	0
P46412	Gpx3	61376.3	48602.6	48595.3	0	0	0
P70352	Art5	61088.3	133250	101833	0	0	0
Q5SX39	Myh4	61053.4	55006.9	60469.7	0	0	0
Q91Z67	Srgap2	60949.7	60967.4	60488.9	0	0	0
Q9D1Y9	Shisal2b	60821.3	87617.3	74985.3	0	0	0
P61089	Ube2n	60800.2	61169.9	48126.9	0	0	0
Q8BKG3	Ptk7	60555.5	43576.5	38541.5	0	0	0
Q8CFA1	Irak2	60501	36842.2	37300.5	0	0	0
Q9CQR2	Rps21	60386.1	45675.8	44724.5	0	0	0
P43406	Itgav	60342.8	52006.4	52214.7	0	0	0
Q6URW6;Q61879	Myh10	60281.6	52396	59749.2	0	0	0
Q62371	Ddr2	60152.3	62856.8	49463.5	0	0	0
Q8BPB5	Efemp1	59418.9	51428.6	59074.5	0	0	0
Q61735	Cd47	59397	50629.7	44943.4	0	0	0
Q91YI0	Asl	59146	55535.9	53955.1	0	0	0
Q9ES64	Ush1c	59106.4	76421.8	67092.9	0	0	0
P84091	Ap2m1	58395.4	57415.7	58678.2	0	0	0
Q6ZWV7	Rpl35	57920.4	40676.6	44353.4	0	0	0
Q61702	Itih1	57833.3	18110	58077.3	0	0	0
Q61009	Scarb1	57805.4	63803.5	56078.5	0	0	0
P70290	Mpp1	57624.8	57609.9	56825.8	0	0	0
Q8K482	Emilin2	57504.5	49182.9	61735.8	0	0	0
Q7TMK9	Syncrip	57275.4	57989.5	52929	0	0	0
Q99J93	Ifitm2	57224.3	34840.2	41268.5	0	0	0
Q8R059	Gale	56961.2	65511.2	64999.4	0	0	0
Q9QY06	Myo9b	56924.4	54908.3	56286.1	0	0	0
Q62188	Dpysl3	56851.6	55077.4	56786.1	0	0	0
O08532	Cacna2d1	56495	62741.9	68874	0	0	0
Q91VI7	Rnh1	56365.4	45347.4	46388.2	0	0	0
O70435	Psma3	56303.6	69417.1	55099.6	0	0	0
O88271	Cfdp1	56301.9	40496.4	25414.2	0	0	0
P97464	Ext1	56125.6	75883.4	75871.2	0	0	0
Q61411;P08556	Hras	55726.9	48931.4	57008.8	0	0	0
P63328;P48453;P48455	Ppp3ca	55568	59418	63560.1	0	0	0
Q8R5J9	Arl6ip5	55563.2	37430.7	36322.6	0	0	0
Q60675	Lama2	55033.1	52781.2	49965	0	0	0
Q60961	Laptm4a	54701.3	35425.8	35016.1	0	0	0
Q9ERA6	Tfip11	54683.9	42459.2	57762.1	0	0	0
Q8C863	Itch	54367.1	56380.2	58136.3	0	0	0
Q91ZP6	Ndfip2	54304.1	26778.7	32707.7	0	0	0
O70589	Cask	54264.7	52921.4	53366.2	0	0	0
Q5F2E7	Nufip2	54199.3	27370	5157.44	0	0	0
P18872	Gnao1	54011.3	47896.4	44420.9	0	0	0
Q9Z2U0	Psma7	53917.2	47344.9	62709.4	0	0	0
Q8CG85	Mamdc2	53722.6	61395.6	65838.9	0	0	0
P51410	Rpl9	53672.5	50831.6	59324.1	0	0	0
Q8BY89	Slc44a2	53637.7	80118.3	73862.9	0	0	0
P70389	Igfals	53492.5	67290.3	72715.2	0	0	0
P70441	Slc9a3r1	53400.7	34537.2	38730	0	0	0
P15532	Nme1	53209.5	107769	69239.8	0	0	0
B2RUP2	Unc13d	52881.4	57744.4	52147.5	0	0	0
Q61730	Il1rap	52638.5	44166.2	43019.9	0	0	0
P61202	Cops2	52584.5	42396.5	37851.7	0	0	0
P35456	Plaur	52404.5	121792	112114	0	0	0
Q11011	Npepps	52308.6	46310.3	44229.1	0	0	0
Q61609	Slc20a1	52295.9	49705.6	51291.2	0	0	0
Q3V1L4	Nt5c2	52229.2	39306.2	24372.1	0	0	0
P35293	Rab18	52079.1	39519.4	46862.1	0	0	0
Q9QUR6	Prep	52016.4	41225.6	37334.1	0	0	0
Q9DCG6	Pbld1	52012.4	45420.3	45164.4	0	0	0
Q8CG16;Q8CFG9	C1ra	51939.7	38783.3	36484.5	0	0	0
P00375	Dhfr	51753.9	57080.2	61466.5	0	0	0
Q99K51	Pls3	51186.3	32089.9	36840.9	0	0	0
Q9CWR7	Steap1	51135.8	26516.2	42768	0	0	0
P21300	Akr1b7	51104.1	58747.2	59579.1	0	0	0
Q8CC86	Naprt	50983.1	30586.6	44170.6	0	0	0
Q9JHZ2	Ankh	50939.5	58344.6	52089.4	0	0	0
Q9JL16	Isg20	50762.1	92570.5	81645.9	0	0	0
Q811D0	Dlg1	50698.7	42562.7	48694	0	0	0
Q01730	Rsu1	50674.4	45691.4	33326.3	0	0	0
Q8VHY0	Cspg4	50645.5	46242.2	53774.9	0	0	0
P46664	Adss2	50522.7	53745.6	56919.3	0	0	0
Q61554	Fbn1	50416.4	56322.5	54258.1	0	0	0
Q9JIZ9	Plscr3	50228	85268.6	59681.4	0	0	0
P24549	Aldh1a1	49814.1	49952.8	46717	0	0	0
Q7TQI3	Otub1	49763	55872.3	54066.5	0	0	0
Q8C1B7;Q8CHH9;Q9R1T4	Septin11	49718	68339.4	60381	0	0	0
Q60767	Ly75	49698.4	54853	41245.9	0	0	0
O35988	Sdc4	49470.3	38653.1	37317.2	0	0	0
Q62470	Itga3	49344.8	47990.9	49745	0	0	0
Q61490	Alcam	49231.4	65515.5	62294.1	0	0	0
Q99P58	Rab27b	49199.1	65938.4	99474.5	0	0	0
Q5U4D8	Slc5a6	49114.5	38218.4	37704	0	0	0
Q9WTX5	Skp1	48893.4	46894.9	46887.4	0	0	0
Q9CZX8	Rps19	48867.8	41952.8	41596.7	0	0	0
Q921W0	Chmp1a	48756.5	44487.8	42115.8	0	0	0
A2AQH4	Bcorl1	48485.4	20869.7	25549.6	0	0	0
P61022	Chp1	48248	45563.4	36466.6	0	0	0
Q62432;Q8BUN5	Smad2	48046.7	40255.1	44906.8	0	0	0
O70251	Eef1b	48029	92854.8	57532.6	0	0	0
Q920A5	Scpep1	47905.6	33718.1	25161.6	0	0	0
Q8BWY3	Etf1	47882.3	32622.5	36751.8	0	0	0
Q9Z2K1	Krt16	47773.9	41879.7	34504.6	0	0	0
P47878	Igfbp3	47675.3	30063.2	38441.3	0	0	0
O54984	Get3	47605	54174.5	57460.9	0	0	0
O88379	Baz1a	47445.6	28128.4	35710.1	0	0	0
Q3UU96	Cdc42bpa	47322.9	31110.8	33392.3	0	0	0
Q9D1G5	Lrrc57	47229.7	40634.1	29307.8	0	0	0
Q6ZQA0	Nbeal2	47217.8	43605.7	46140.4	0	0	0
Q9CZR2	Naalad2	47082.4	43407.5	41950.8	0	0	0
P52332	Jak1	46994.5	38479.5	37702.4	0	0	0
P10923	Spp1	46921	65245.9	64779.2	0	0	0
Q8BG67	Efr3a	46728.7	46370.8	42267.5	0	0	0
Q9WUL7	Arl3	46637.1	39134	38745.1	0	0	0
Q9QY73	Tmem59	46549.7	58382.1	47465.1	0	0	0
P0DP27;P0DP28;P0DP26	Calm1;Calm2;Calm3	46549	134257	113323	0	0	0
Q99KK9;Q61035	Hars1	46435.2	45314.5	37110.8	0	0	0
Q99MQ4	Aspn	46405.2	45837.8	46361.8	0	0	0
Q91WB7	Ubtd1	46049	70803.1	69076.9	0	0	0
P17426	Ap2a1	45927.1	49121.4	46163.6	0	0	0
Q8R0G7	Spns1	45736.3	45447.9	37641.3	0	0	0
Q8CBR6	Tsku	45722.3	35891.4	35547.6	0	0	0
P32921	Wars1	45715.5	36245.4	30284.6	0	0	0
P62849	Rps24	45559	46332.1	35153.8	0	0	0
Q8K2P7	Slc38a1	45490.3	39663.9	45419	0	0	0
Q9Z1T1;Q9JME5	Ap3b1	45488.9	36200	40007.8	0	0	0
Q9JHS3	Lamtor2	45440.7	44077.9	44883.5	0	0	0
Q9JIS8	Slc12a4	45268.4	43974.8	47881.5	0	0	0
Q9Z0P4	Palm	45216.2	51451.9	69629.3	0	0	0
Q8K009;Q8R0Y6	Aldh1l1	45136.1	33895.7	34689.6	0	0	0
Q8BM72	Hspa13	45058.7	30706.7	27603.7	0	0	0
Q9R1P1	Psmb3	44897.9	29265.5	24807.7	0	0	0
P62911	Rpl32	44897.5	71950.2	62900.8	0	0	0
Q63739;O70274	Ptp4a2	44840.7	40359.4	31714.7	0	0	0
Q9QYH6	Maged1	44782.2	50293.5	107116	0	0	0
Q6P5F6	Slc39a10	44677.3	44105.4	46393.5	0	0	0
P49962	Srp9	44628.5	37312.7	36787.4	0	0	0
P49817	Cav1	44492.1	66492.1	84057	0	0	0
Q9QXK2	Rad18	44414.7	45644	34167.6	0	0	0
Q9R1P4	Psma1	44410.1	60247.9	71431.9	0	0	0
Q8BMJ3	Eif1ax	44255.6	33588.3	38900.9	0	0	0
P48759	Ptx3	44243.5	38912	39372.8	0	0	0
P14602	Hspb1	44200.9	60187.5	65799.1	0	0	0
Q3UV17	Krt76	44073.5	68604.6	35494.1	0	0	0
P31041	Cd28	44046.7	47734.5	48145.2	0	0	0
Q9DBC7	Prkar1a	44043	39990.9	44818.7	0	0	0
Q9CZ28	Snf8	43953.9	47445.6	50602.9	0	0	0
P97321	Fap	43860.5	40273	39035.5	0	0	0
Q61171	Prdx2	43738	39206.3	38086.6	0	0	0
P56371	Rab4a	43718.8	43556.6	43896.3	0	0	0
Q80X71	Tmem106b	43671.9	48687.5	45475.8	0	0	0
P48428	Tbca	43544.6	28738.2	24246.5	0	0	0
Q8VHB5	Ca9	43492.6	36972.5	39651.7	0	0	0
Q9R1E6	Enpp2	43412.4	39865.5	43030.7	0	0	0
Q9D832	Dnajb4	43248.3	39904.7	34846.9	0	0	0
Q9R0K7	Atp2b2	43216.7	30255.5	29024.2	0	0	0
Q8BH97	Rcn3	43187.5	35569.9	38060	0	0	0
Q9R1Q8	Tagln3	42984.6	77886.9	56146.3	0	0	0
Q60668	Hnrnpd	42971	38429.7	48092.7	0	0	0
Q9JK48	Sh3glb1	42954.9	25562.4	27216.2	0	0	0
Q8CIH5	Plcg2	42615.8	37244.3	38614.9	0	0	0
P51432	Plcb3	42487.3	43612.3	44831.1	0	0	0
Q9Z1Z0	Uso1	42424.6	48522.6	58387.8	0	0	0
O70570	Pigr	42420.8	35431.1	36427.8	0	0	0
Q9WUM3	Coro1b	42404.3	57748.8	52141	0	0	0
Q8C102	Galnt5	42282.5	30801.3	31095	0	0	0
Q8JZK9	Hmgcs1	42250.2	40067.4	38958.3	0	0	0
P49429	Hpd	42104.6	33741	37314.3	0	0	0
Q8VHX6	Flnc	42103.2	39109.6	40300.2	0	0	0
P61953	Gng11	42051.9	63472.2	59047.5	0	0	0
Q62219	Tgfb1i1	41983.6	44708	46469.6	0	0	0
Q61220	Nell2	41914.2	39126.6	35725.6	0	0	0
Q9R0Q3	Tmed2	41821.4	24518.4	16231.9	0	0	0
Q62356	Fstl1	41734.5	51112.3	55240.8	0	0	0
Q91XY4	Pcdhga4	41717.2	24781.7	20526.8	0	0	0
P28481	Col2a1	41636.3	51695	42973.6	0	0	0
Q7TMM9	Tubb2a	41586.6	28567.5	25436.8	0	0	0
Q9JLM8	Dclk1	41515.5	18064.9	12810	0	0	0
Q8C181	Mbnl2	41404.1	44553.8	47541.7	0	0	0
O70400	Pdlim1	41292.6	51687.9	43637.8	0	0	0
Q8CEZ1	Smco1	41234.8	44433.7	59784.6	0	0	0
O35103	Omd	41160.8	24244.7	26422.9	0	0	0
Q7TPZ8	Cpa1	41150	12589.1	19571.2	0	0	0
Q8VE70	Pdcd10	41094.8	40610.5	50661.4	0	0	0
Q8R016	Blmh	41061.7	37705.7	45130	0	0	0
O88544	Cops4	41047.2	42175.4	42559.2	0	0	0
Q9EPR4	Slc23a2	40997.4	44874.5	50024.1	0	0	0
P40336	Vps26a	40889	20834.6	22401.8	0	0	0
Q9CWS0	Ddah1	40850.7	36823.7	36054	0	0	0
P21836	Ache	40848.6	64454.4	47590.3	0	0	0
Q9CQR6	Ppp6c	40832.6	34893.3	40171.1	0	0	0
Q921J2	Rheb	40715.3	92580.4	79812.4	0	0	0
Q60710	Samhd1	40514	18264.3	18299.9	0	0	0
Q8BWJ3	Phka2	40508.6	31755.5	30446.2	0	0	0
Q921E2	Rab31	40461.2	25436.5	30135.1	0	0	0
P54731	Faf1	40429.2	43303.6	47267.4	0	0	0
Q62059	Vcan	40187.8	40488.5	48122.4	0	0	0
Q8BG05	Hnrnpa3	40178.2	40169.1	38163.7	0	0	0
Q3U1J4	Ddb1	40152.1	44290.1	40156.4	0	0	0
P22777	Serpine1	40106	26873.7	27412.3	0	0	0
Q9ET30	Tm9sf3	39953.8	58216	58480.4	0	0	0
P43274	H1-4	39872.2	19079.8	17675.3	0	0	0
P51863	Atp6v0d1	39783.9	33214.9	26626.1	0	0	0
P49182	Serpind1	39703.1	116963	110163	0	0	0
Q6VH22	Ift172	39579	19599.3	17241.9	0	0	0
P04223	H2-K1	39526.9	30614.9	29156.5	0	0	0
P13745;P30115;P10648	Gsta1;Gsta2	39524	40299	32423	0	0	0
P16110	Lgals3	39412.6	34773.8	39447.5	0	0	0
P62751	Rpl23a	39302.6	50278.8	20211.3	0	0	0
P67871	Csnk2b	39236.9	73861.5	61388	0	0	0
Q9DCG9	Trmt112	39215.1	33858.9	19900.3	0	0	0
Q8BX17	Gemin5	39169	34630.3	30836.2	0	0	0
P22892	Ap1g1	39036.1	38933.3	38735.8	0	0	0
Q8BFR4	Gns	38927.3	27500	26124.2	0	0	0
Q80TH2	Erbin	38842.7	39088.5	37674.7	0	0	0
P54761	Ephb4	38822	25218.9	25927.4	0	0	0
Q9JIF7	Copb1	38748.1	38366.1	38917.1	0	0	0
Q6PDS3	Sarm1	38632.6	27958.5	31777.8	0	0	0
Q8BTH8	Csnk1g1	38630	36100.6	33103	0	0	0
Q8C0Z1	Fam234a	38542.9	29976.3	41667.3	0	0	0
Q8BK63	Csnk1a1	38347.1	37576.9	26109.7	0	0	0
O35405	Pld3	38009.3	6736.13	7056.38	0	0	0
Q61584	Fxr1	37933.5	29478.9	28464.7	0	0	0
O55142	Rpl35a	37927	52381	60158.5	0	0	0
Q922E4	Pcyt2	37919.1	45850.7	42980	0	0	0
Q8K371	Amotl2	37883.6	21210.3	15276.4	0	0	0
Q00915	Rbp1	37848.9	27807.2	32132.3	0	0	0
P30416	Fkbp4	37807.8	44462	41490.6	0	0	0
Q9CPV4	Glod4	37644.4	27649.8	26882	0	0	0
Q8K1I3	Spp2	37414.1	131754	110213	0	0	0
P97823	Lypla1	37225.3	22231.4	25397.5	0	0	0
Q8BWT5	Dip2a	37198.4	31245.4	30399.3	0	0	0
Q9D2R0	Aacs	37151.4	27410.1	24576.8	0	0	0
P01633;P01634	Igk-V19-17	37148.8	33371.4	47563.4	0	0	0
Q9D8B7	Jam3	37088.1	27113.2	31857.1	0	0	0
Q9R0Q7	Ptges3	36996.8	51348.7	44990.1	0	0	0
Q8BLX7	Col16a1	36984.1	9635.95	13380.1	0	0	0
Q99KH8	Stk24	36964.3	36881.8	34991.7	0	0	0
Q9QY15	Ddx25	36890.7	30284.5	29926.3	0	0	0
Q9DBP5	Cmpk1	36838	51784.3	52959	0	0	0
P35822	Ptprk	36796.5	31800.5	34747.1	0	0	0
P27612	Plaa	36703	33043.9	24977.3	0	0	0
P12850	Cxcl1	36639.8	38527.9	39255.3	0	0	0
Q9EPC1	Parva	36581.4	36859.6	89804.2	0	0	0
P50608	Fmod	36537.4	36196.8	36510.9	0	0	0
Q99NB9	Sf3b1	36483.6	37993.8	36334.9	0	0	0
O54774	Ap3d1	36461	31355.2	34831.6	0	0	0
Q99LI8	Hgs	36442.7	29606.9	27458.8	0	0	0
Q03249	Galt	36428.2	32046.1	25885.1	0	0	0
Q9DBH5	Lman2	36408.1	49303.1	42387.9	0	0	0
Q9DD20	Mettl7b	36346.4	450025	214478	0	0	0
Q8K353	Cystm1	36285.3	7543.71	15202.3	0	0	0
Q9WV80;Q9CWK8	Snx2	36236.9	33454.8	33503.3	0	0	0
Q61210	Arhgef1	36060.2	38281.2	32557.3	0	0	0
Q8BVP5;Q8C4X2;Q8BTH8	Csnk1g3	36019.3	38798.3	35678.4	0	0	0
P35235	Ptpn11	35839.7	33794.1	37004.9	0	0	0
Q7TT37	Elp1	35760.2	27370.8	29478.5	0	0	0
Q60751	Igf1r	35735.6	28099.7	26721.2	0	0	0
Q8BIK4	Dock9	35653.6	27333	24912.2	0	0	0
P47199	Cryz	35546.8	39351.7	27255.7	0	0	0
P27656	Lipc	35503.9	26506.7	28738.8	0	0	0
P61961	Ufm1	35487.1	26745.7	27391.7	0	0	0
P50396	Gdi1	35415.9	32964.1	29837.6	0	0	0
Q3UKC1	Tax1bp1	35405.2	35826.7	30073.1	0	0	0
Q91YN9	Bag2	35369.2	29579.3	33479.5	0	0	0
P11835	Itgb2	35347.8	29614.3	31224.6	0	0	0
P61971	Nutf2	35317.3	44824.1	36932.5	0	0	0
P55002	Mfap2	35271.4	35773.3	35997.7	0	0	0
Q9CYN9	Atp6ap2	34997.8	16405.6	19898.9	0	0	0
Q7TNG5	Eml2	34879.3	30707.5	34438.2	0	0	0
Q99KN1	Arrdc1	34769.5	30969.1	28925.9	0	0	0
P0C0A3	Chmp6	34758.7	38989.3	37543.7	0	0	0
Q6PB93	Galnt2	34695.8	34305.5	34623.2	0	0	0
Q05186	Rcn1	34654.8	42010.5	46586	0	0	0
Q9CXE7	Tmed5	34650.8	34704.5	33812.3	0	0	0
P05201	Got1	34505.2	29431.1	35119.2	0	0	0
Q3U487	Hectd3	34462.5	26361.1	27471.9	0	0	0
Q61147	Cp	34426.2	37279.3	35274.1	0	0	0
Q5EG47	Prkaa1	34396.7	45851.7	38946.1	0	0	0
P70697	Urod	34326	32094.4	33822.4	0	0	0
P62748	Hpcal1	34268.4	35427.6	38527.8	0	0	0
Q8CIG8	Prmt5	34191.3	31945	26544	0	0	0
Q8BK64	Ahsa1	34130.6	30246.7	37053.9	0	0	0
Q8BUV3	Gphn	34087.6	21388.1	20924.6	0	0	0
Q8BWB6	Steap2	34038.6	35147.6	40750.3	0	0	0
Q8QZR4	Oaf	34034.6	25895	30120	0	0	0
Q9D0B6	Pbdc1	33970	25865.5	34995.4	0	0	0
Q3TEW6	Mpzl1	33932.6	21831.4	25166.8	0	0	0
P29758	Oat	33927.5	2621.42	27111.3	0	0	0
Q8VED9	Lgalsl	33893.8	42597	31466.8	0	0	0
Q8CHR6	Dpyd	33712.4	22521.9	25116.3	0	0	0
Q3TC72	Fahd2	33687.1	45933.4	31785.7	0	0	0
Q62469	Itga2	33672.7	31527.4	31828.2	0	0	0
O55134	Pcdh12	33668.4	30845	28367.4	0	0	0
P63087	Ppp1cc	33647.5	7592.46	14566.2	0	0	0
Q8CA71	Shisa4	33646.3	25448.9	29015.4	0	0	0
P02798	Mt2	33532.5	35283.4	49365.3	0	0	0
Q9QZ88	Vps29	33396	27882.3	31666.7	0	0	0
O70172	Pip4k2a	33190.6	30660.2	29338.3	0	0	0
Q8BV57	Ssc5d	33131.4	35587.2	30333.9	0	0	0
Q99LE6	Abcf2	33128.9	30344.4	32607.4	0	0	0
E9Q3L2	Pi4ka	33099	30874.8	29781.3	0	0	0
P97326	Cdh6	33011.4	32238.3	23639.9	0	0	0
Q8BFY9	Tnpo1	32879	38026.7	36030.6	0	0	0
Q91VH6	Memo1	32874.6	31296.8	27432.6	0	0	0
Q3THK7	Gmps	32850.5	28936.4	24873.9	0	0	0
P62267	Rps23	32800.3	21784.7	25072.7	0	0	0
P34928	Apoc1	32761.7	43123.3	41810.3	0	0	0
P60840	Ensa	32628.5	25632	36584.9	0	0	0
Q9WTS6	Tenm3	32602.4	35819.6	30597.2	0	0	0
Q8R4W6	Pcolce2	32580.3	16502	20216.1	0	0	0
Q9QUG9	Rasgrp2	32572.5	29530.8	26710.9	0	0	0
Q8K201	Kct2	32569	15494.1	21867.5	0	0	0
Q61206	Pafah1b2	32518.5	22813.9	21664.3	0	0	0
Q9CQR7	Psenen	32279.8	26356.8	27862.3	0	0	0
P09041	Pgk2	32271.3	25079.2	26663.6	0	0	0
Q673U1	Hs3st2	32256.4	27768.9	28371.3	0	0	0
Q9EPL8	Ipo7	32168.7	29050.9	22966.3	0	0	0
P21107	Tpm3	32154	35203.3	38172.1	0	0	0
Q8VBW1	Slc6a8	32148.5	25453.8	24340.7	0	0	0
O35516	Notch2	32114	41132.9	36706.7	0	0	0
P61358	Rpl27	31995.6	50983.5	43974.2	0	0	0
P35492	Hal	31907.4	26373.6	22773.8	0	0	0
P49769	Psen1	31907.2	30562	24838.8	0	0	0
Q78RX3	Smim12	31847.9	33003.6	26720.5	0	0	0
Q8R550	Sh3kbp1	31809.3	32407.1	31822.6	0	0	0
Q6P9P6	Kif11	31720	17071.9	17839	0	0	0
Q02105	C1qc	31711.3	43004.9	37274.1	0	0	0
P29268	Ccn2	31692.2	15729.8	22317.6	0	0	0
Q64433	Hspe1	31689.7	18568.1	20595.5	0	0	0
P70297	Stam	31654.2	25949.8	27386.8	0	0	0
P46061	Rangap1	31653.7	24440.8	24595	0	0	0
Q3U1V6	Uevld	31470.8	28084.9	30840.1	0	0	0
Q8BH43	Wasf2	31431.8	24164.3	26041.4	0	0	0
P70303	Ctps2	31362.8	16158	27612.1	0	0	0
Q6P9Q4	Fhod1	31356.1	22010.4	24587.5	0	0	0
P62320	Snrpd3	31280.6	32643.7	33725	0	0	0
O35874	Slc1a4	31234.6	51055.1	49766.5	0	0	0
Q3UMC0	Spata5	31191.9	23229.2	19288.5	0	0	0
Q9DCV7;P03995;Q6NXH9;Q9Z2T6	Krt73	31128.2	20077	21438.4	0	0	0
P53811	Pitpnb	31125.8	32439.1	26383.5	0	0	0
Q9CQ10	Chmp3	31111.5	39723	41834.2	0	0	0
P58069	Rasa2	31096.3	23587.4	21673.9	0	0	0
P16092;Q03142;P21803;Q61851	Fgfr1	31090	24402	32587.5	0	0	0
O88634	F2rl3	31068	54744.5	62096.4	0	0	0
P21460	Cst3	31034.3	85004.6	72961.8	0	0	0
O70293	Grk6	30963.1	27024.3	27276.5	0	0	0
Q9QZJ6	Mfap5	30952.6	79647.5	73064.2	0	0	0
O70443	Gnaz	30936.5	21304.8	23728.5	0	0	0
Q8BYH7	Tbc1d17	30865	22647.4	20498	0	0	0
Q9ERI2	Rab27a	30805.6	39237.9	38100	0	0	0
Q9Z2M7	Pmm2	30743.5	22027.3	21897.1	0	0	0
Q6ZQ93	Usp34	30732.5	28859.2	14229.2	0	0	0
Q8K124	Plekho2	30625.7	32128.3	28002.8	0	0	0
Q80TL7	Mon2	30565.3	27663.3	23783.3	0	0	0
Q9D0R2	Tars1	30538.8	38713.3	39352.4	0	0	0
A2AF47	Dock11	30514.7	23506.6	25978	0	0	0
P01887	B2m	30464.4	17082.1	19726.2	0	0	0
O70309	Itgb5	30419.5	30157.7	35967.6	0	0	0
Q6EDY6	Carmil1	30405.9	27682.7	23191.5	0	0	0
Q99KR3	Lactb2	30349.4	26339.4	27702.4	0	0	0
Q640N1	Aebp1	30331.6	32977.1	35376.4	0	0	0
Q9D8U8	Snx5	30322.4	25410.4	20417.9	0	0	0
Q8BRN9	Cc2d1b	30175.9	26848.1	25280.3	0	0	0
Q91YH5	Atl3	30075.4	15313.8	15760.7	0	0	0
Q920E5	Fdps	30066	29269.8	30797	0	0	0
P43407	Sdc2	30056.8	34836.6	57210.8	0	0	0
Q6NTA4;Q80X95	Rraga	30021.3	29927.9	22220.8	0	0	0
Q61166	Mapre1	29971	24791.3	29845.2	0	0	0
Q9D1E6	Tbcb	29855.3	24576.3	17657.7	0	0	0
Q91VR7;Q9CQV6	Map1lc3b	29837.7	35335.6	28556.3	0	0	0
Q9WUK2	Eif4h	29828	25145.1	24850.1	0	0	0
P54822	Adsl	29638	26155	21602.4	0	0	0
O35682	Myadm	29587.9	113495	87144.7	0	0	0
Q9WVJ3	Cpq	29567.8	26092.9	27862.7	0	0	0
Q7TSH2	Phkb	29536.7	22288.7	17767.6	0	0	0
Q60787	Lcp2	29481.5	18149.3	22599.5	0	0	0
Q62376	Snrnp70	29432.6	30864.5	33518.5	0	0	0
Q06806	Tie1	29411	18943	26937	0	0	0
O70250	Pgam2	29384.4	24539	27734.8	0	0	0
P12960	Cntn1	29280.9	20968.5	20542.2	0	0	0
Q9D6G5	Tmem138	29218.8	22074	28425.9	0	0	0
Q8C4Q6	Aida	29058.7	19416.1	25321.1	0	0	0
Q9EST5	Anp32b	28990.8	30018.6	24623.8	0	0	0
Q9Z2H5	Epb41l1	28947.7	33409.6	32712.6	0	0	0
P55288	Cdh11	28914.6	25878.3	25445.1	0	0	0
Q5F2E8	Taok1	28881.5	23773.8	20928	0	0	0
P04345	Cryga	28839.8	32113.8	32248	0	0	0
P15864	H1-2	28826.1	23549.8	18061.9	0	0	0
P61514	Rpl37a	28811.1	20668.2	33121	0	0	0
O88569	Hnrnpa2b1	28722.9	44381.4	30030.4	0	0	0
Q07079	Igfbp5	28670.9	23229	23875.4	0	0	0
Q8VHR0	Pcdh18	28624	30644	33070.7	0	0	0
P04095;P04768	Prl2c2	28494.9	32486.5	36924.5	0	0	0
Q922Y1	Ubxn1	28431.6	21100.8	13506.8	0	0	0
Q9Z138	Ror2	28376.2	28210	24930.2	0	0	0
Q60854	Serpinb6	28356.8	28776.5	27473.8	0	0	0
Q8BHD7	Ptbp3	28347.8	28604.4	32220.1	0	0	0
Q8VC12	Uroc1	28304	27542.7	23084.2	0	0	0
O70404	Vamp8	28299.1	52042	41607.2	0	0	0
A2ASS6	Ttn	28297.8	49059.6	17781	0	0	0
P62746	Rhob	28236.4	30243.5	28706.8	0	0	0
P30681;P63158	Hmgb1	28199.5	30507.4	27625.8	0	0	0
Q00993	Axl	28181.1	26060.2	28753.9	0	0	0
Q9DC11	Plxdc2	28165.9	27051.2	25853.2	0	0	0
Q93092	Taldo1	28094.7	43934.1	41071	0	0	0
Q11136	Pepd	27994.2	36321.3	31644.7	0	0	0
Q9R087	Gpc6	27958.1	37615.1	33718.7	0	0	0
P35951	Ldlr	27859.1	26174.9	25967.4	0	0	0
Q8C7R4	Uba6	27830	33039.3	37487.3	0	0	0
Q60972	Rbbp4	27810.3	23805.1	27424.5	0	0	0
Q02819	Nucb1	27777.2	31712	30208.4	0	0	0
P08556	Nras	27661.2	39189.4	39150.2	0	0	0
P62830	Rpl23	27661.2	212449	203413	0	0	0
Q9EPL2	Clstn1	27655.9	24417.3	28281.8	0	0	0
P18653	Rps6ka1	27629.5	48930.3	21637.7	0	0	0
P97765	Wbp2	27628.3	20849.7	26529.9	0	0	0
P63073	Eif4e	27610.2	20357.9	27514.8	0	0	0
Q7TNV0	Dek	27575.3	27367.8	20937.8	0	0	0
Q61391	Mme	27552.4	24314.4	24965.6	0	0	0
O88384	Vti1b	27537.6	10771.8	20781.5	0	0	0
P54726;P54728	Rad23b	27512.9	37084.6	41338.8	0	0	0
Q6ZWX6	Eif2s1	27470	22932.9	23383.7	0	0	0
P68037	Ube2l3	27342.6	27993.7	30280.3	0	0	0
Q61081	Cdc37	27309.5	30140	26366.3	0	0	0
P47880	Igfbp6	27272.8	37671.9	28737.6	0	0	0
Q8N7N5	Dcaf8	27243.2	23384.9	46182.7	0	0	0
O88393	Tgfbr3	27224.2	31601.6	25350	0	0	0
Q62312	Tgfbr2	27220.6	20392.6	22521.9	0	0	0
O70325	Gpx4	27177.8	25854.5	20061.7	0	0	0
Q9WTZ2	Mbtps1	27158.6	26103	26693	0	0	0
P37172	Acvr1	27147.1	20061.3	18096.5	0	0	0
Q9WV54	Asah1	27121.6	28675.8	20985.6	0	0	0
Q8C3J5	Dock2	27029.5	22421.5	22045.2	0	0	0
O55201	Supt5h	26945.3	9272.45	30136.8	0	0	0
Q99PP7	Trim33	26939.4	67650.2	81531.2	0	0	0
Q8BZZ3	Wwp1	26808.2	19991.7	23480.8	0	0	0
Q99020	Hnrnpab	26802.9	22122.4	12094.8	0	0	0
Q6PEB6	Mob4	26795	22233	15638.3	0	0	0
P70296	Pebp1	26794.6	65403.2	60100	0	0	0
P63044;P63024	Vamp2	26721.6	41570	33977.9	0	0	0
Q9QY33	Tspan3	26675.9	27380.1	29192.8	0	0	0
Q8R5M8	Cadm1	26672.9	22649.5	21874.4	0	0	0
Q9D819	Ppa1	26626.9	28641.7	34570.9	0	0	0
O08539	Bin1	26609	32530.1	33543.1	0	0	0
D3Z7H8	Cilp2	26591.3	22510.6	23361.3	0	0	0
Q2M2N2	Spopl	26567.7	24166.9	26841.3	0	0	0
P50543	S100a11	26539.6	17467.3	12207	0	0	0
Q6PGH1	Bud31	26524.2	16782.4	20649.8	0	0	0
P28659	Celf1	26498.2	36360.5	25589.1	0	0	0
Q8CJ53	Trip10	26484.4	21151.3	20466.2	0	0	0
P26928	Mst1	26468	28488.7	29250.2	0	0	0
Q62148;P47738	Aldh2	26456.1	27332.4	26294.6	0	0	0
Q9ES56	Trappc4	26409.7	16410.4	19904.6	0	0	0
Q9EQU5	Set	26394.4	23133.9	22698.8	0	0	0
Q4VBE8	Wdr18	26367.2	19845.8	24592.3	0	0	0
Q99K48	Nono	26340	28837.7	23241.5	0	0	0
Q62137	Jak3	26283.6	20129.7	23031.3	0	0	0
Q64012	Raly	26271.9	8474.08	12333.4	0	0	0
Q91VK1	Bzw2	26240.2	18861.4	21431.2	0	0	0
Q3TJD7	Pdlim7	26235.6	33624.1	26399.5	0	0	0
Q9D2Q3	Paat	26232.4	21031.6	20933.2	0	0	0
Q9Z0J1	Reck	26200	24470	17431.8	0	0	0
O09061	Psmb1	26170.7	20923.6	28241.3	0	0	0
O54724	Cavin1	26159.1	29837	19639.5	0	0	0
Q8CEG0	Panx3	26150	31504.5	31391.2	0	0	0
P50446;Q8BGZ7;Q9Z331	Krt6a	26100.1	27001.3	17825.6	0	0	0
Q62443	Nptx1	26082	25036.1	18406.4	0	0	0
Q9CQI3	Gmfb	26010.3	23416	15222.9	0	0	0
Q80Z24	Negr1	25905.8	20733.6	26837.9	0	0	0
Q9CQM5	Txndc17	25825.7	24226.9	40343.4	0	0	0
Q8BNU0	Armc6	25816.4	13114.1	17874.3	0	0	0
Q7TQH0	Atxn2l	25814.5	29324.3	24286.7	0	0	0
Q3USZ8	Dipk2a	25782.3	21278.9	24355.6	0	0	0
Q91VS8	Farp2	25749.9	21299.5	26450.6	0	0	0
Q9CQW1	Ykt6	25723.4	37443.4	28232.2	0	0	0
O09159	Man2b1	25587.3	27480.9	30892.6	0	0	0
Q80ZA4	Pkhd1l1	25552.9	19592.6	23285	0	0	0
P28740	Kif2a	25543.7	16688.2	21549.3	0	0	0
P40630	Tfam	25476.4	17698.9	25898.5	0	0	0
Q8BZZ3;Q9DBH0	Wwp2	25462.4	24423.1	27122.5	0	0	0
O70624	Myoc	25453	18893.4	16285.9	0	0	0
Q8K4G1	Ltbp4	25442.2	21181.8	20347.5	0	0	0
P49718	Mcm5	25432.5	22010.4	27961.4	0	0	0
P61750	Arf4	25422.8	24290.5	18691.8	0	0	0
P58774	Tpm2	25333.6	62702.9	52307.4	0	0	0
Q8BY71	Hat1	25333.5	12930.2	8784.62	0	0	0
Q8R1G2	Cmbl	25328.8	23949.2	17817.1	0	0	0
Q80XC3	Usp6nl	25310.2	22879.9	20016.6	0	0	0
Q05909	Ptprg	25310.1	31847.5	29378.5	0	0	0
Q62165	Dag1	25260.6	31282.4	27025.2	0	0	0
P39053	Dnm1	25167.8	31844.4	28238.7	0	0	0
Q8VCT3	Rnpep	25137.2	25429	29277.8	0	0	0
Q01405	Sec23a	25113.1	19554.7	20172.3	0	0	0
Q9JK38	Gnpnat1	25066.1	20016.2	18550.2	0	0	0
Q61792	Lasp1	24986.8	23707.2	23397.6	0	0	0
Q9D1A2	Cndp2	24971.5	43001	31472.6	0	0	0
Q5SSH7	Zzef1	24911	25388.3	28224.4	0	0	0
Q05512	Mark2	24840.3	23440.7	19815.6	0	0	0
Q8CG19	Ltbp1	24817.5	16777.1	17804.6	0	0	0
Q9QWL7	Krt17	24757.5	32021.3	18093.6	0	0	0
P36895	Bmpr1a	24650	15460.5	18744.8	0	0	0
P97372;P97371	Psme1	24630.5	17354.8	25262.5	0	0	0
Q9DBV4	Mxra8	24593.9	27153.1	27509.8	0	0	0
Q60996	Ppp2r5c	24582.7	16915.7	17999.1	0	0	0
Q9CZU3	Mtrex	24470	20848.1	23702.6	0	0	0
O88545	Cops6	24461.4	16503.2	18091	0	0	0
P58466	Ctdsp1	24359.9	24309.9	27597.6	0	0	0
Q9WTL7	Lypla2	24339.9	20704	29369.4	0	0	0
Q3UW53	Niban1	24329.9	16967.2	20161.6	0	0	0
Q62318	Trim28	24300.3	14217.3	12006.5	0	0	0
Q7TNC9	Inpp5a	24267.3	21292.1	14280.5	0	0	0
P61079;Q6ZWY6;P62838	Ube2d3	24239.7	40568.4	63163.4	0	0	0
Q9Z172;P61957	Sumo2	24191.9	17639.6	23339.7	0	0	0
P61087	Ube2k	24129.7	20094.9	22820.8	0	0	0
O88958	Gnpda1	24053.3	17972.4	15325.1	0	0	0
Q91WM1	Strbp	24026.8	17698.5	21842.8	0	0	0
Q149F3;Q8R050	Gspt1	23981.1	26117.6	25662.7	0	0	0
Q08093	Cnn2	23948.5	49584.8	76015	0	0	0
Q5FWK3	Arhgap1	23938.6	19021.2	17298.7	0	0	0
Q9DB60	Prxl2b	23905	26615.4	23780.7	0	0	0
Q80U19;Q8BPM0	Daam1	23874.6	17808.6	15127.5	0	0	0
O35350	Capn1	23853.8	29341.6	21172	0	0	0
E9Q5C9	Nolc1	23807.3	21161	13892.3	0	0	0
Q9JIF0	Prmt1	23770.2	26137.7	23849.9	0	0	0
Q91X83	Mat1a	23769.7	22792.9	17723.6	0	0	0
Q501J7	Phactr4	23667.6	41371.5	35372.8	0	0	0
Q9R1P3	Psmb2	23660.4	29452.5	29512.1	0	0	0
Q6NZC7	Sec23ip	23659.2	22157	18998.6	0	0	0
Q2PZL6	Fat4	23616.2	20189.1	19428	0	0	0
Q8CGB6	Tns2	23539.8	15060.9	17680.3	0	0	0
P68181;P05132	Prkacb	23539.5	23656.4	19644.4	0	0	0
Q7TMR0	Prcp	23502.1	17242.1	18898	0	0	0
O89112	Lancl1	23451.1	33978.1	23879.9	0	0	0
Q8BZ98	Dnm3	23447.2	21195.7	26900	0	0	0
F7BWT7	Tspan15	23388	25212.5	20879.9	0	0	0
Q06194	F8	23350.5	24075.6	23996.1	0	0	0
Q8BFY6	Pef1	23348	21983.4	24098	0	0	0
Q9QWR8	Naga	23268.5	20697.1	16195.1	0	0	0
Q8BTI8	Srrm2	23217.8	9176.98	18161.3	0	0	0
Q3U0V1	Khsrp	23168.5	24880.9	23066.2	0	0	0
Q60870	Reep5	23164.2	21659.9	26777.5	0	0	0
Q80X90	Flnb	23137.6	22081.6	21677.4	0	0	0
Q8C145	Slc39a6	23123	16891.1	18136.7	0	0	0
P15105	Glul	23100.7	9482.22	9277.41	0	0	0
P62869	Elob	23051.7	25835.9	19338.3	0	0	0
E9Q236	Abcc4	23028.3	18697.3	21232.9	0	0	0
Q9Z1B5	Mad2l1	22957.3	24981.1	14054.6	0	0	0
O35099;A2AQW0	Map3k5	22903.3	18029.5	18606.2	0	0	0
P29351	Ptpn6	22876.2	13250	18948.4	0	0	0
Q8K1S3;O08747	Unc5b	22861.4	23613.7	24762.7	0	0	0
Q6PDH0	Phldb1	22853.9	21646.4	19784.1	0	0	0
P61793	Lpar1	22850.2	24072.5	22912	0	0	0
P83741	Wnk1	22841	17195.8	17909.9	0	0	0
Q61235	Sntb2	22834.9	22138.7	24137.7	0	0	0
Q5DQR4	Stxbp5l	22781.2	20851.2	18752.8	0	0	0
Q5DTM8	Rnf20	22775.8	3106.49	6870.96	0	0	0
Q9EPK7	Xpo7	22765.1	17985.4	17656.7	0	0	0
Q8VBT0	Tmx1	22738.6	5090.56	12723.5	0	0	0
Q61097	Ksr1	22658.2	18195.5	16425.3	0	0	0
P47941	Crkl	22644.3	37803.6	22061.8	0	0	0
Q9JKB1;P58321	Uchl3	22635.6	26898.2	29060.9	0	0	0
A2AGT5	Ckap5	22611.9	21140.3	19793.2	0	0	0
P59325	Eif5	22590.6	20005.6	16893.4	0	0	0
P62743	Ap2s1	22575.6	26129.3	36336.7	0	0	0
O35286	Dhx15	22554.9	21612.9	20476.1	0	0	0
Q8BNA6	Fat3	22538.1	23143.8	18084.6	0	0	0
P41105	Rpl28	22480.7	33203.1	33574.1	0	0	0
Q9JM76	Arpc3	22434.5	19231.8	20492.5	0	0	0
Q91YT7	Ythdf2	22356.6	24451.3	17141.9	0	0	0
P62080	Tspan5	22334.7	15528.6	16051.6	0	0	0
Q91WQ3	Yars1	22316.1	21474.7	17575.9	0	0	0
Q8CJF9;Q8CJG0;Q8CJG1	Ago2	22293	25559.9	22032.9	0	0	0
Q8CHG3	Gcc2	22292.2	26161.4	18799.9	0	0	0
O09117	Sypl1	22278.3	46557.6	23033.2	0	0	0
Q05144	Rac2	22239.6	24748.2	20230.8	0	0	0
Q9QZQ1	Afdn	22221.9	23955.5	22752.7	0	0	0
Q9JM99	Prg4	22183.2	13822.6	19149	0	0	0
P70460	Vasp	22168.5	144423	123234	0	0	0
Q6ZWY3	Rps27l	22110.7	8215.86	13901.4	0	0	0
Q64449	Mrc2	22080.2	38010.1	34251.6	0	0	0
Q78ZA7	Nap1l4	22077	14550.7	18367.7	0	0	0
O35381	Anp32a	22076.6	26593.2	22482.5	0	0	0
P70663	Sparcl1	22057.3	18519.7	19868.4	0	0	0
O55013	Trappc3	22050.2	27801	12618.3	0	0	0
P17439	Gba	22020.1	22552.2	13675.1	0	0	0
P54823	Ddx6	21995.9	23939.4	23124.9	0	0	0
P97430	Slpi	21995	17056.6	19252.5	0	0	0
P24527	Lta4h	21980	15872.3	20533.8	0	0	0
Q6NVE8	Wdr44	21977.2	24632.2	25245.2	0	0	0
P55249	Alox12e	21974.7	18729.4	13067.7	0	0	0
P15535	B4galt1	21926.8	76039.4	76040	0	0	0
Q9JI58;O08602;O08603	Raet1d	21905.9	15909.9	23563.9	0	0	0
Q9CXY6	Ilf2	21866.5	27219	20149.2	0	0	0
Q61738	Itga7	21852.5	23723	38511.2	0	0	0
Q9DBD0	Ica	21824.2	18834.6	16553.5	0	0	0
P07310	Ckm	21815.4	12043.2	14969.6	0	0	0
O09172	Gclm	21775.8	26159.7	24351.8	0	0	0
Q8R3Q2	Ppp6r2	21719.4	22818.9	30587.2	0	0	0
Q3UHX2	Pdap1	21711.7	29854.7	26826.4	0	0	0
Q8VCR7	Abhd14b	21699	27718	20674.5	0	0	0
Q99JX3	Gorasp2	21695.2	16433.4	16874.6	0	0	0
Q91VR8	Brk1	21685.4	17822.2	15503	0	0	0
Q62523	Zyx	21625.8	49360.4	20331.6	0	0	0
O35640	Anxa8	21620.8	25927.9	25950.2	0	0	0
Q9DAK9	Phpt1	21554.9	14659	17306.2	0	0	0
Q8R146	Apeh	21551.3	22688.1	22367	0	0	0
P48774	Gstm5	21533.5	20324	20256.8	0	0	0
Q91VZ6	Smap1	21504.3	16533.1	15036.8	0	0	0
Q8BZ03;Q62101	Prkd2	21400.5	14591.4	16310.2	0	0	0
Q9CZ44	Nsfl1c	21399.6	23602.1	14330.5	0	0	0
P58710	Gulo	21388.8	19130.2	18556.1	0	0	0
P34152	Ptk2	21359.2	21765.8	25055.2	0	0	0
Q8R480	Nup85	21352.4	3231.64	8394.11	0	0	0
Q91VU0	Fam3c	21337.6	22097	21524.6	0	0	0
Q9JLV1	Bag3	21319.3	14771.7	19401.6	0	0	0
Q9JKC8	Ap3m1	21307.5	21089.9	18033	0	0	0
P41245	Mmp9	21262	26563.2	22140.8	0	0	0
Q920B9	Supt16h	21247.4	20948.5	14167.8	0	0	0
Q8C7K6	Pcyox1l	21241.3	23375.2	28598.9	0	0	0
P70372	Elavl1	21197.7	15878.1	15409.4	0	0	0
P70266	Pfkfb1	21175.9	49903	10053.8	0	0	0
Q3U1J0	Slc38a5	21119.9	18656.2	17637.6	0	0	0
P26262	Klkb1	21068.2	26117.4	24746.1	0	0	0
B1AY13	Usp24	21008	22710.5	17344.6	0	0	0
Q9CQF9	Pcyox1	20998	11773.1	19400.7	0	0	0
O55100	Syngr1	20978	19681.4	17902.5	0	0	0
Q3U962	Col5a2	20937	29548.1	19441	0	0	0
Q04750	Top1	20935.3	31408.4	20657	0	0	0
Q8CIN4	Pak2	20908.3	20226.4	23571.4	0	0	0
Q64692	St8sia4	20907	26055.3	19098.7	0	0	0
Q8CG03	Pde5a	20889.3	19156.7	21719.4	0	0	0
O88543	Cops3	20843.5	16665.9	15279.6	0	0	0
Q8CGB3	Uaca	20823.1	20196.1	19851	0	0	0
Q91WJ8	Fubp1	20810.3	23838.8	23000.7	0	0	0
Q9JI10	Stk3	20787.5	17073.5	13827.1	0	0	0
Q922M3	Kctd10	20776.4	19753.4	23275.2	0	0	0
P16330	Cnp	20747.7	21377	18842.1	0	0	0
Q8VH51	Rbm39	20746.5	14731.2	19249.7	0	0	0
Q5XF89	Atp13a3	20732.7	15588.7	17543	0	0	0
O35685	Nudc	20723.1	14384.3	16367.6	0	0	0
Q60932	Vdac1	20709.9	14235.2	12704.1	0	0	0
P18406	Ccn1	20703.5	18931.1	18259.8	0	0	0
Q3UM83	Klrg2	20672	13311	15525.3	0	0	0
O55098	Stk10	20644.4	26419.1	22096	0	0	0
P58389	Ptpa	20619	17424.6	17174.7	0	0	0
Q3TBD2	Arhgap45	20561.5	19736.2	19124.7	0	0	0
Q9CPU0	Glo1	20553.1	33054	25803.7	0	0	0
Q6IRU2	Tpm4	20512.8	19123.4	24226.3	0	0	0
Q8BJF9	Chmp2b	20487.5	13882.4	13037.6	0	0	0
Q9DCR2	Ap3s1	20443.6	14329.6	16282.6	0	0	0
Q91VW3	Sh3bgrl3	20432	20660.6	20720.7	0	0	0
Q99LD4	Gps1	20396.2	22160.4	23013.3	0	0	0
P61025	Cks1b	20393.1	20531.7	19271.5	0	0	0
Q9JMA1	Usp14	20367.9	25585.2	25921.6	0	0	0
Q9QYY8	Spast	20358.5	14209	13017.8	0	0	0
Q6ZPT1	Klhl9	20324.1	15857.7	17015.1	0	0	0
Q9CQ19	Myl9	20314.3	19579.3	19952.2	0	0	0
P47713	Pla2g4a	20231.8	21338.1	18298	0	0	0
Q9Z0G0;Q8R5M0	Gipc1	20183.8	17029.3	19464.3	0	0	0
P35283	Rab12	20160	13147.2	13991.2	0	0	0
Q8VEK0	Tmem30a	20138.5	20164.2	7700.51	0	0	0
Q05895	Thbs3	20106.7	24213.7	26204.4	0	0	0
Q9Z2P8	Vamp5	20088.3	19268.2	19223.1	0	0	0
P14733	Lmnb1	20052	18183.6	18291.2	0	0	0
O54865	Gucy1b1	20045.7	12012.2	12056.7	0	0	0
O70378	Emc8	20041.2	3317.13	3317.68	0	0	0
Q9QY36;Q3UX61	Naa10	20036.1	9903.43	13741.4	0	0	0
P00493	Hprt1	20013.9	23458.6	26206.8	0	0	0
O08574	Mesp2	20006.7	24814.7	19574.5	0	0	0
Q9CPW4	Arpc5	19990.9	8647.5	155357	0	0	0
P13707	Gpd1	19977.7	16418	14638.2	0	0	0
P70428	Ext2	19971.3	18478.9	19831.3	0	0	0
E9Q8I9	Fry	19901.3	15386.1	14908.8	0	0	0
Q3UE37	Ube2z	19890.6	18245.1	18100.5	0	0	0
Q9CQI6	Cotl1	19888.4	14954.7	17498.4	0	0	0
Q9QXS1	Plec	19860.9	17274.9	16869.9	0	0	0
P70261	Pald1	19860.3	19363.8	15467.1	0	0	0
Q924K8	Mta3	19831.7	11970.9	912.066	0	0	0
Q8BUR4	Dock1	19817.3	12521.5	16519	0	0	0
Q8BYC6	Taok3	19798.5	21786.3	22324.8	0	0	0
P70335	Rock1	19713.3	21040.8	13686.9	0	0	0
Q8CI11	Gnl3	19680.8	25492.2	1882.52	0	0	0
Q9JM58	Crlf1	19662.9	24570.8	19720.3	0	0	0
Q923Z0	Gprc5b	19660.5	15914.1	13760.8	0	0	0
Q61333	Tnfaip2	19625.1	17805.5	17530.1	0	0	0
Q3UPH1	Prrc1	19607.9	6063.28	2333.52	0	0	0
Q9EQQ9	Oga	19591.9	16587.6	24113.6	0	0	0
Q61165	Slc9a1	19553.1	15680.7	15318	0	0	0
Q62426	Cstb	19520.5	23740.7	19536.3	0	0	0
O08858	Sstr5	19453.6	27123.9	28122.8	0	0	0
Q8BTW9	Pak4	19443.3	8287.66	11432.3	0	0	0
O35671	Itgb1bp1	19393.6	14198.6	18026.4	0	0	0
Q9CZ04	Cops7a	19367.6	8716.41	14218.6	0	0	0
P13439	Umps	19326.2	17079.1	15385.8	0	0	0
Q9Z1R2	Bag6	19310.7	11641.6	19161.1	0	0	0
Q9Z2M6	Ubl3	19296.6	9874.11	26287.4	0	0	0
Q9JHI9	Slc40a1	19270.2	14778.9	17574.8	0	0	0
Q9R1S8	Capn7	19243.9	17029	15796.6	0	0	0
Q9ESE1	Lrba	19189.6	19373.1	19938.7	0	0	0
P00920	Ca2	19169.8	22866.6	20955.7	0	0	0
Q9R257	Hebp1	19130.9	21395.3	23130	0	0	0
P83887;Q8VCK3	Tubg1	19124.7	24729	17250.4	0	0	0
Q9R182	Angptl3	19103.3	10568.7	14672.4	0	0	0
Q8VHH5;Q8BXK8	Agap1	19091	13733.4	14340.3	0	0	0
Q3UFY7	Nt5c3b	19078.8	15392.3	17877.1	0	0	0
Q91Y97	Aldob	19047.7	40179.5	31233.7	0	0	0
Q80U87	Usp8	19047	21831.5	16829.3	0	0	0
Q9DBR3	Armc8	19032.6	11863.7	7404.92	0	0	0
P39098	Man1a2	18987.8	20718.3	5864.3	0	0	0
Q3V0J1	Tmem237	18975.7	25469.3	31493.1	0	0	0
Q9DB50;P61967	Ap1s1	18956.2	27204.2	22531.2	0	0	0
Q99K70	Rragc	18949.7	21528.6	16316.3	0	0	0
Q3UPH7	Arhgef40	18913.5	18250.3	17169.7	0	0	0
O08808	Diaph1	18891.6	12994.4	14243.7	0	0	0
P62715	Ppp2cb	18875.1	16107.9	14400.1	0	0	0
Q91XV3	Basp1	18797.8	16120.2	13621.1	0	0	0
Q9D898	Arpc5l	18790.4	24098.5	20863	0	0	0
P62069;Q9D9M2	Usp12	18770.6	14825.8	13559	0	0	0
Q68FE6	Ripor1	18737.7	17529.9	16235.2	0	0	0
Q8C7D2	Crbn	18733.9	16102.6	16939.1	0	0	0
P38647	Hspa9	18727.2	21718.8	18612.3	0	0	0
P60904	Dnajc5	18718.2	21206.2	24490.9	0	0	0
P11438	Lamp1	18716.7	13046	15964.1	0	0	0
Q8C0E2	Vps26b	18695.1	9524.86	11575.3	0	0	0
Q91XD4	Ftcd	18629.5	16938.2	17115.3	0	0	0
Q8CHP8	Pgp	18615.3	18322.7	19276	0	0	0
Q64669	Nqo1	18606.2	17696.5	15272.6	0	0	0
Q8BGB7	Enoph1	18572.2	8417.3	9682.35	0	0	0
P18337	Sell	18561.4	17658.7	18934.3	0	0	0
Q08509	Eps8	18533.8	19550.6	18108	0	0	0
P62257	Ube2h	18527.5	16675.7	10563.4	0	0	0
Q99MS7	Ehbp1l1	18499.3	19194	16622.2	0	0	0
P70670;Q60817	Naca	18438.6	8650.3	10746.2	0	0	0
P11157	Rrm2	18383.4	14919	16422.1	0	0	0
Q91ZR2	Snx18	18377.8	18153.3	13931.4	0	0	0
Q60967	Papss1	18371.3	22335.3	20143.9	0	0	0
Q8VCC9	Spon1	18369.6	17729.5	15527.5	0	0	0
Q8BHL5	Elmo2	18360.5	11348.5	14010.8	0	0	0
Q9QYC0	Add1	18359.6	14642.5	17439.3	0	0	0
Q9CR16	Ppid	18357.6	16336.3	20332.2	0	0	0
Q8BWW9	Pkn2	18347.7	20562.5	21998.1	0	0	0
P70122	Sbds	18338.7	18362.1	19951.8	0	0	0
P58465	Ctdspl	18296.1	12661.3	13952.1	0	0	0
Q61937	Npm1	18295.9	21912.5	19290.6	0	0	0
Q9ESY9	Ifi30	18271.9	18406.1	15865.9	0	0	0
Q9WTK7	Stk11	18234.7	13758.6	16513.5	0	0	0
O54988	Slk	18214	14728.4	16700.1	0	0	0
Q8R349	Cdc16	18191.2	16466.1	16477.6	0	0	0
P42669	Pura	18147.4	32774	27879.1	0	0	0
P36916	Gnl1	18144.5	12523.1	12601.1	0	0	0
Q9CQC6	Bzw1	18142.9	16788.3	18964.1	0	0	0
Q8K2J0	Plcd3	18133	16241.1	16173.2	0	0	0
Q9CXW3	Cacybp	18130.8	19262.9	18068	0	0	0
Q8VIJ6	Sfpq	18086.9	21169.5	15990.7	0	0	0
P52432	Polr1c	18081.8	16587.1	12180	0	0	0
Q8C8U0;O35711	Ppfibp1	18058.2	18235.6	15930.2	0	0	0
Q6DFW4	Nop58	18050.9	22939.4	21254	0	0	0
P04925	Prnp	18031.6	27874.7	17044.8	0	0	0
O08759	Ube3a	18030.5	13856.7	15759.7	0	0	0
Q9QXG4	Acss2	18021.4	30979.3	22587.6	0	0	0
Q80ZJ1	Rap2a	17984.3	14608.2	13299.5	0	0	0
Q9JJV2	Pfn2	17950.7	11522.6	19861.6	0	0	0
P23927	Cryab	17932	11724.2	11635.4	0	0	0
Q80UP8	Slc20a2	17924.4	18022.4	17664.3	0	0	0
Q99K01	Pdxdc1	17913.4	19858.4	17711.8	0	0	0
Q9WV55	Vapa	17908.9	9623.81	11433	0	0	0
Q03265	Atp5f1a	17904	9282.9	13489.9	0	0	0
Q8VHL0	Slc14a1	17890.3	13760.6	12539.1	0	0	0
P17710	Hk1	17887.6	12150.1	12373.5	0	0	0
Q9DCN2	Cyb5r3	17869.4	18153.4	27210.5	0	0	0
O54950	Prkag1	17827.4	15377.1	16985.8	0	0	0
P42225	Stat1	17825.2	26703.5	25582	0	0	0
Q8BP48	Metap1	17801.9	12283.3	10688.3	0	0	0
P70202	Lxn	17800.9	16097	17664.9	0	0	0
Q9JM98	Wrap73	17798.5	32664.5	16855	0	0	0
Q6Y7W8	Gigyf2	17787.4	9161.7	5256.56	0	0	0
Q8C129	Lnpep	17786.4	17241.3	17706.4	0	0	0
Q6PAV2	Herc4	17782.2	14636	15530.6	0	0	0
P20060	Hexb	17753.2	16047.7	11570.4	0	0	0
Q9D1D6	Cthrc1	17740	10254.8	16554.7	0	0	0
Q91WM1;Q9Z1X4	Ilf3	17730.1	29039.7	20887.9	0	0	0
O88693	Ugcg	17722.8	19216.5	15277.5	0	0	0
Q9CQE8	RTRAF	17719.1	15105.4	15067.1	0	0	0
Q9JHR7	Ide	17703.4	25531.5	22561.7	0	0	0
Q60716	P4ha2	17699.3	13487.4	13049.3	0	0	0
Q8C1A5	Thop1	17687	26220.9	17820.2	0	0	0
P35922	Fmr1	17664.3	18998.5	13544.3	0	0	0
Q9JJ11	Tacc3	17642.3	12514.4	14120	0	0	0
Q9ET43	Cldn12	17640.4	14090.9	17635.8	0	0	0
Q9QWY8	Asap1	17627.4	13945.6	27775.7	0	0	0
Q69ZR2	Hectd1	17618.9	18671.2	17066.3	0	0	0
Q9CXU9;P48024	Eif1	17618.1	11138.9	10721.8	0	0	0
Q8BSK8;Q9Z1M4	Rps6kb2	17616.7	9464.5	13484.1	0	0	0
Q99J72	Apobec3	17616.2	13348.9	13126	0	0	0
O08915	Aip	17615.8	22402	16293.7	0	0	0
Q6PFR5	Tra2a	17527.6	16549.9	21044.9	0	0	0
Q8K1X4	Nckap1l	17494	20208.1	18402.6	0	0	0
Q8K2V6	Ipo11	17472.6	11485.9	16774.7	0	0	0
P42232	Stat5b	17457.9	19373.9	19593.5	0	0	0
P32037	Slc2a3	17416.5	25078	20829.7	0	0	0
P10649	Gstm1	17400.6	14845.3	20016.3	0	0	0
O35604	Npc1	17390.7	12823.6	11164	0	0	0
P15261	Ifngr1	17376.4	16559.6	9701.41	0	0	0
Q7TQH7	Lrp10	17353.4	11229.6	14287.1	0	0	0
P70207	Plxna2	17351.6	14872.9	16457	0	0	0
Q8BJW6	Eif2a	17292.6	17423.8	9890.34	0	0	0
Q6ZPJ3	Ube2o	17284.1	16196.9	16891.4	0	0	0
Q9QYK7	Rnf11	17274.8	16030.1	15587.4	0	0	0
P27046	Man2a1	17245.4	16029.6	16977.2	0	0	0
P61294	Rab6b	17228.6	20385.2	19700.3	0	0	0
P62627	Dynlrb1	17226.8	14797.8	14131.2	0	0	0
P61924	Copz1	17218.1	8714.97	14737.6	0	0	0
Q91YJ2	Snx4	17175.3	17787.5	18838	0	0	0
P12023	App	17164.6	13147.1	11482.3	0	0	0
Q07813	Bax	17154.8	14033.1	16268.1	0	0	0
Q80TV8	Clasp1	17152.5	32207.4	23040.4	0	0	0
Q80WQ2	Vac14	17085.8	11180.9	14797.3	0	0	0
Q9CZQ6	Raet1e	17085.3	16964.1	13782.8	0	0	0
Q6ZQ58	Larp1	17075.7	16347.1	10980.8	0	0	0
P28654	Dcn	17056.7	12368.9	13583	0	0	0
Q8R081	Hnrnpl	17047.9	23149	20704	0	0	0
Q5SVL6	Rap1gap2	17036.2	9924.6	11165.4	0	0	0
Q62186	Ssr4	17009.6	14352.4	12136.4	0	0	0
Q922T2	Mfap3	16945.2	18215.6	14058.7	0	0	0
Q9QZB7	Actr10	16940.3	19238.6	13594.3	0	0	0
P12367	Prkar2a	16905.6	20826.7	15673.7	0	0	0
P56959	Fus	16898.1	16510.3	15386.1	0	0	0
Q9D8Y0	Efhd2	16863.4	13735	11991.6	0	0	0
Q8BI06	Cemip	16863.1	21692.2	17584.7	0	0	0
Q5FWI3	Cemip2	16786.4	14375	13109.8	0	0	0
P45591	Cfl2	16767.3	17592.4	13346	0	0	0
Q9JKK1	Stx6	16765.4	17762.4	19298.1	0	0	0
Q8BH57	Wdr48	16760	17134.5	14565.9	0	0	0
Q3UZZ6	Sult1d1	16758.2	28715.3	31468.5	0	0	0
Q8BG26	Rusc1	16704.9	9736.79	9336.07	0	0	0
Q9JL15	Lgals8	16687.4	11440.2	17331.5	0	0	0
P61759	Vbp1	16650.9	19955.7	13872.1	0	0	0
P07141	Csf1	16636.7	10948.3	12651	0	0	0
Q9QXK3	Copg2	16610	15170.8	15791.5	0	0	0
Q9Z0Y1	Dctn3	16600.1	33050.1	15445.5	0	0	0
Q03173	Enah	16593.6	34323.1	30086.1	0	0	0
P42227	Stat3	16591.3	21195.9	18259.8	0	0	0
Q9D868	Ppih	16587.2	12073.9	13439.6	0	0	0
Q3U7R1	Esyt1	16583.2	18949.8	16957.2	0	0	0
Q61468	Msln	16504.2	12033.5	11864.3	0	0	0
P35550	Fbl	16482.8	17930.7	17454.1	0	0	0
B2RSH2	Gnai1	16397.8	15003.9	17753.2	0	0	0
Q922D4	Ppp6r3	16392.4	15574.4	13732.4	0	0	0
Q62179	Sema4b	16386.7	18465.4	22473.5	0	0	0
Q6PIP5	Nudcd1	16373	19765.2	27756.9	0	0	0
Q6S5C2	Gnptg	16368.4	10991.6	12374.9	0	0	0
P56812	Pdcd5	16365.7	17100.3	19215.5	0	0	0
Q8VC52	Rbpms2	16359.5	11129	16595.9	0	0	0
Q9D8T2	Gsdmd	16333.2	8408.41	14505.5	0	0	0
Q61033	Tmpo	16312.4	14082.9	7549.83	0	0	0
Q9JKX6	Nudt5	16296.2	13515.6	14219.3	0	0	0
E2JF22	Piezo1	16293.7	11506.8	23711.8	0	0	0
Q3UQ44	Iqgap2	16278.1	15393.6	17100.9	0	0	0
Q6DIB5	Megf10	16276.7	28027.3	33344.3	0	0	0
Q9D4H8	Cul2	16272.3	12762.8	11443.9	0	0	0
O35864	Cops5	16219.7	27423.5	24083.8	0	0	0
Q99L45	Eif2s2	16190.1	14418.9	12129.4	0	0	0
P56546;O88712	Ctbp1	16183	22006.8	17103	0	0	0
O35632	Hyal2	16181	13463.4	18442.5	0	0	0
Q60598	Cttn	16146.3	13596.7	13762.9	0	0	0
Q9ES30	C1qtnf3	16137.5	30273.7	29769.4	0	0	0
P16546	Sptan1	16118	13624.1	14527.9	0	0	0
Q501P1	Fbln7	16113.4	22882.1	26489.4	0	0	0
P59108	Cpne2	16099.5	16582.3	21072.6	0	0	0
Q9DCE5	Pak1ip1	16097.6	10275.7	3718.05	0	0	0
Q6ZQK5	Acap2	16084.6	14905.3	16517.9	0	0	0
Q2NL51;Q9WV60	Gsk3a	16079	18255.8	19258.6	0	0	0
P63318;P20444	Prkca	16066.8	13655.7	14571.5	0	0	0
Q6P9N1;Q8C729	Fam126a	16062.2	17237.7	19408.8	0	0	0
P61290	Psme3	16055.1	24965.9	14190	0	0	0
Q8BGS1	Epb41l5	16047.5	15355.1	12065.5	0	0	0
P70677	Casp3	16000.9	18333.9	17611.9	0	0	0
Q9QYB5	Add3	15995.2	14612.8	18499.2	0	0	0
Q9JLV5	Cul3	15985.1	12635.3	16009.9	0	0	0
Q9CWZ7	Napg	15969.3	17325.4	19453.4	0	0	0
Q8K1N2	Phldb2	15965.4	15986.3	17781	0	0	0
O88668	Creg1	15955	14158.2	7315.48	0	0	0
B2RY04	Dock5	15932.1	18736.2	18399.3	0	0	0
Q91VJ4	Stk38	15903.1	21138.4	19569.7	0	0	0
Q7TSV4	Pgm2	15886.8	20307.9	21590.6	0	0	0
O35344	Kpna3	15883.5	20576.3	17545.6	0	0	0
P17047	Lamp2	15881	9029.89	10916.5	0	0	0
Q99KD5	Unc45a	15853.9	19695.1	21595.3	0	0	0
Q9QVP9	Ptk2b	15833.4	16547.3	15004.5	0	0	0
P08249	Mdh2	15829.4	9485.01	6961.76	0	0	0
O35382	Exoc4	15815.3	12759.9	16832	0	0	0
Q6P2B1	Tnpo3	15786.7	22001.9	13901	0	0	0
Q9D1C1	Ube2c	15779.2	13530.7	6827.67	0	0	0
Q3UBX0	Tmem109	15778.4	13763.6	18665.6	0	0	0
Q8R1S4	Mtss1	15772.5	11073.6	11970.3	0	0	0
P24288	Bcat1	15760.8	12356	16941.8	0	0	0
Q9JHW9	Aldh1a3	15753.6	11355.5	11642.6	0	0	0
P35585	Ap1m1	15738.5	12831.7	14933.3	0	0	0
Q80V53	Chst14	15713.3	11295.1	9484.53	0	0	0
E9PYK3	Parp4	15676.4	10629.7	13913.4	0	0	0
O88643	Pak1	15673.2	10725.9	15296.9	0	0	0
Q8R0L9	Tada3	15666.3	8345.45	31609.8	0	0	0
Q9JIW5;P70340	Smad1	15664.1	12974.5	15335.2	0	0	0
Q9EQC5	Scyl1	15651.6	15946.6	12135.1	0	0	0
Q6P9R2	Oxsr1	15627.3	16967.4	20082.4	0	0	0
P70218	Map4k1	15623.7	11639.2	19610.1	0	0	0
Q2YDW2	Msto1	15604.7	14662.9	9920.93	0	0	0
Q9D0J4	Arl2	15602.2	13510.1	10209.2	0	0	0
Q9JLN9	Mtor	15597	9708.67	10560.5	0	0	0
Q8R5A3	Apbb1ip	15551.5	10413.9	7288.96	0	0	0
P63011	Rab3a	15545.6	10730.3	14200.1	0	0	0
P55144;Q60805	Mertk;Tyro3	15531.9	12888.6	12183.3	0	0	0
Q9CZT5	Vasn	15523.1	14060.7	12050.8	0	0	0
Q9CRC8	Lrrc40	15517	11537.5	13311.9	0	0	0
Q9CQ48	Nudcd2	15507.3	12022.7	18069.1	0	0	0
Q5SSL4	Abr	15500.7	14152.9	14448.4	0	0	0
Q9D662	Sec23b	15497.3	21360.2	21897.8	0	0	0
Q91X97;P84075	Ncald	15495.8	11037.2	13232.9	0	0	0
O89001	Cpd	15489.2	15212.2	17338.9	0	0	0
P26443	Glud1	15450.9	10397.8	21173.5	0	0	0
Q9WUU7	Ctsz	15427.3	25057.3	21166.9	0	0	0
Q9CQM9	Glrx3	15415	10904.4	14386.5	0	0	0
E9Q634	Myo1e	15372.7	16666.8	17793.3	0	0	0
Q8VBW6	Nae1	15348.8	13105.9	14638.2	0	0	0
P11031	Sub1	15348.5	17627.4	13738.1	0	0	0
Q8R4H2	Arhgef12	15346.5	13768.7	10298	0	0	0
Q7TQJ1	Marveld1	15343.5	8613.3	8234.73	0	0	0
Q3U1T9	Dennd1b	15282.1	9205.53	10033.3	0	0	0
A2A5R2	Arfgef2	15278.5	17410.1	16982.2	0	0	0
Q99LS3	Psph	15262.7	13558.9	18188.9	0	0	0
Q3U2P1	Sec24a	15259.3	11186.1	9026.91	0	0	0
Q6NT99	Dusp23	15250.4	14097.4	13445	0	0	0
Q91YI4	Arrb2	15208.2	4769.37	14120.3	0	0	0
Q6P8X1	Snx6	15202.5	18963.7	14052.4	0	0	0
Q8BWY2	Clec1a	15162.6	14568.2	13345.9	0	0	0
Q9Z0L0	Tpbg	15097.1	20512.2	22402.4	0	0	0
P70333	Hnrnph2	15058.8	8276.34	12149.3	0	0	0
O89113	Ier5	15017.3	17862.8	18379.7	0	0	0
Q3U2C5	Rnf149	15007.9	7927.37	10370	0	0	0
Q9DBR7	Ppp1r12a	14995.2	12165	10945	0	0	0
Q6PDN3	Mylk	14989.1	8726.38	10243.7	0	0	0
Q9WUP7	Uchl5	14986.1	17729	16510.5	0	0	0
Q8K2V1	Ppp4r1	14979.1	9030.47	12591.8	0	0	0
B9EJR8	Dnaaf5	14966.1	7106.07	11648.2	0	0	0
Q8VC03	Eml3	14964.5	12059.8	9884.73	0	0	0
Q3TB82	Plekhf1	14944	15414.6	13268.5	0	0	0
Q921M3	Sf3b3	14927.4	17136.1	11781.8	0	0	0
Q9QZM0	Ubqln2	14925.1	22148.9	18537.4	0	0	0
Q9JI33	Ntn4	14919.9	13830.9	13254.2	0	0	0
Q91VK4	Itm2c	14894.2	39685.4	29406.3	0	0	0
P10810	Cd14	14892.3	26767.9	17954.3	0	0	0
Q8R0I0	Ace2	14883.3	16726.8	11052.3	0	0	0
Q9D8N2	Dennd10	14870.7	13125.3	34110	0	0	0
Q9WV85	Nme3	14845.1	10536.9	12519.6	0	0	0
Q3UIA2	Arhgap17	14839.9	19970.4	13119.5	0	0	0
Q9CUN6	Smurf1	14828.7	9632.84	12385.9	0	0	0
Q9CR75	Tnfrsf12a	14827.7	17304.2	17726.8	0	0	0
Q8K012	Fnbp1l	14826.5	16326.8	17132.4	0	0	0
Q80SY4	Mib1	14824.6	10495	9752	0	0	0
Q3UM45	Ppp1r7	14816.7	12017.7	12414.8	0	0	0
Q80U95	Ube3c	14813.7	15013.4	17252.4	0	0	0
Q02357	Ank1	14797.7	15480.6	15104.8	0	0	0
Q8BWG8	Arrb1	14794.7	13740.4	13731.4	0	0	0
Q99M51	Nck1	14793.9	18120.9	14352.4	0	0	0
Q99KY4	Gak	14789.6	11588.1	10472.5	0	0	0
Q9ES74	Nek7	14742.2	12381.1	16451.9	0	0	0
Q6Y5D8	Arhgap10	14731.1	8619.97	11315.2	0	0	0
Q9CRA5	Golph3	14704.4	10307	14915.3	0	0	0
O08599	Stxbp1	14694.1	19787.8	20654.7	0	0	0
Q60865	Caprin1	14693.8	10705.3	11057.4	0	0	0
Q6ZQ08	Cnot1	14693.6	12873.1	13331.5	0	0	0
Q8K1Y2;Q8BZ03	Prkd3	14683.7	13718.8	16649.4	0	0	0
Q8K3H0	Appl1	14679.3	16345.7	17325.8	0	0	0
Q3V3R4	Itga1	14676.3	17806.6	15132.4	0	0	0
Q3THW5;P0C0S6	H2az1;H2az2	14676.2	7630.96	9554.94	0	0	0
Q8BTU1	Cfap20	14651.9	18672.4	11436.1	0	0	0
Q8BRF7	Scfd1	14648.2	13399.5	12918.1	0	0	0
Q99KK7	Dpp3	14642.9	22469	20193.7	0	0	0
Q8K310	Matr3	14624.8	18389.9	18020	0	0	0
Q8BHG1	Nrdc	14616.8	11851.9	10372.7	0	0	0
Q8BH24	Tm9sf4	14608	10139.1	13323.7	0	0	0
Q00PI9	Hnrnpul2	14577.3	15701.2	14027.7	0	0	0
Q9DC29	Abcb6	14576.7	26059.1	27191.3	0	0	0
Q920Q4	Vps16	14574.4	10713.7	9297.84	0	0	0
P98156	Vldlr	14570.3	13445.1	19382.4	0	0	0
Q61205	Pafah1b3	14516.8	18894.6	8332.82	0	0	0
Q9CZX0	Elp3	14516.7	14177	23392	0	0	0
Q3B7Z2	Osbp	14487.2	13651.1	17557.6	0	0	0
P48722	Hspa4l	14470.6	13079.2	11502.6	0	0	0
Q9DAX2	Plpp2	14462.3	10207.5	6679.52	0	0	0
P47811	Mapk14	14449.2	13316.5	12344.8	0	0	0
Q80Y17	Llgl1	14432.8	9865.88	9406.74	0	0	0
Q9CYG7	Tomm34	14398.9	18973.7	12594.5	0	0	0
Q9QXL2	Kif21a	14391.2	12891.4	10039.6	0	0	0
Q6PGB8;Q91ZW3	Smarca5	14371.4	15000.8	12402.7	0	0	0
Q8CFI7	Polr2b	14358.5	13181.5	13628.5	0	0	0
Q9EPK2	Rp2	14355.4	18727.8	19056.7	0	0	0
Q66K08	Cilp	14348.4	11910.8	9720.28	0	0	0
Q8BVF7	Aph1a	14345.2	28783.1	26051.2	0	0	0
O54819	Tfpi	14324.3	13729.6	11225.1	0	0	0
Q99JH8	Kdelr1	14323.9	17412.4	22026.3	0	0	0
P22725	Wnt5a	14313.4	22985.5	26167.7	0	0	0
Q8BVL3	Snx17	14307.2	10127.8	11025.4	0	0	0
Q04519	Smpd1	14306	22411.9	23639.4	0	0	0
Q8BJU0	Sgta	14304	8403.64	13892.6	0	0	0
Q8CG48	Smc2	14280	11589.8	13211.8	0	0	0
P70193	Lrig1	14279.4	15381.5	13154.8	0	0	0
Q99K41	Emilin1	14276.6	13159.8	12715	0	0	0
Q5SSW2	Psme4	14270.7	11026	15632.9	0	0	0
Q9R0M6	Rab9a	14258.2	13823	11257.7	0	0	0
Q8VDW0	Ddx39a	14233.3	21581.6	18586.9	0	0	0
Q8BFW7	Lpp	14229.2	13863.1	15126.2	0	0	0
Q6DIC0;Q3TKT4	Smarca4	14203	9094.48	5956.88	0	0	0
Q3TIU4	Pde12	14174.4	11050	16130.7	0	0	0
Q99L20	Gstt3	14165.4	10753.7	11386.9	0	0	0
Q3UMG5	Lrch2	14125.9	1038.66	974.388	0	0	0
P62311	Lsm3	14118.2	9353.14	9940.49	0	0	0
Q9D035	Nkain1	14092.3	13663.1	10933.1	0	0	0
Q8BX70	Vps13c	14085.2	14933.9	13684.3	0	0	0
O88811	Stam2	14078.1	9243.05	10226.6	0	0	0
P58404	Strn4	14068.5	8277.36	13544.2	0	0	0
P60670	Nploc4	14065	18505.7	16330.9	0	0	0
Q9CQ60	Pgls	14063.5	17691.7	14015.7	0	0	0
[truncated: 1,535 more rows]

## Sheet: mouse cancer cell lines common
Protein ID	Genes	MC38-EXO-1	MC38-EXO-2	MC38-EXO-3	LFQ intensity GXJ-B16-exo-1	LFQ intensity GXJ-B16-exo-2	LFQ intensity GXJ-B16-exo-3
P30285	Cdk4	2614.43	2003.89	3819.69	380370	272560	390610
P61205;P84078	Arf1;Arf3	3035.71	2005.96	6515.72	407330	1012300	859230
Q62418	Dbnl	3668.05	9699.47	7170.23	160660	250510	168360
Q9ERN0	Scamp2	3777.83	3408.84	6430.77	512950	490250	462760
Q9DBG6	Rpn2	3859.27	2581.59	4896.19	2393100	681890	876890
E9Q5G3	Kif23	4537.94	5392.12	7165.47	1358200	1159200	1478100
Q80VP0	Tecpr1	4692.93	3936.74	3597.39	1107900	1118100	1440900
P97857	Adamts1	4708.88	5059.13	4851.32	3229400	2073900	2881100
Q6ZQ73	Cand2	4813.01	2343.32	5590.33	792210	764940	822460
Q9R1C7	Prpf40a	4900.04	2682.52	3391.11	189420	115490	184860
P56395	Cyb5a	5093.01	7516.59	11259	850340	1107800	982710
Q9Z2A0	Pdpk1	5193.27	5040.04	4264.65	113110	147730	147140
Q5SQX6	Cyfip2	5208.45	5109.04	7063.18	378680	342370	388030
Q8R2Y2	Mcam	5662.85	5824.62	530.077	3385800	2485400	3466200
Q921F2	Tardbp	5685.58	4589.47	5757.96	1091900	1238100	1092600
Q8R180	Ero1a	5749.12	3463.32	4807.51	848800	990540	1004700
Q9D6Y9	Gbe1	5973.43	4559.51	4358.55	710210	854360	751900
Q4VAA7	Snx33	6033.84	3141.95	5263.19	816800	876880	751220
Q9JM52	Mink1	6054.29	9971.15	19930.5	303660	322940	321680
Q921G8	Tubgcp2	6619.15	6486.16	9155.06	215020	172550	243050
Q6IQX7	Chpf	6627.64	6358.27	7682.93	149610	150400	131060
Q9WVM1	Racgap1	6627.87	9078.87	6308.51	1618300	1577700	1761200
Q8VD75	Hip1	6637.29	10728.5	13354.2	1723600	1810100	1857100
Q99P91	Gpnmb	6677.24	39324.3	17705.2	3203300	3123700	2716200
Q9Z1F9	Uba2	7179.83	10921.5	6739.46	134030	156090	68994
Q8K021	Scamp1	7298.81	16553.5	7077.06	2193800	2806500	2624700
Q9Z0S1	Bpnt1	7326.78	12200	9290.29	161830	238080	190730
B0V2N1	Ptprs	7329.02	6521.95	6062.25	236150	448030	1279900
P62855	Rps26	7341.94	6295.56	5314.3	2270600	2449600	2430600
Q80T21	Adamtsl4	7444.87	6378.76	7805.67	347200	360500	355150
Q05816	Fabp5	7737.07	5924.24	8006.97	1328900	1345500	1064900
Q8K3G9	Appl2	7782.27	3791.33	5320.27	514770	456760	486220
Q8VEH6	Cbwd1	7834.14	7560.93	13885.5	156610	174430	117950
O08528;Q91W97	Hk2	7958.21	10054.4	7544.04	7828700	8394700	7998400
Q8VDV8	Mitd1	8331.34	6528.76	4177.28	362670	334460	318600
P84089	Erh	8393.94	5057.39	9211.73	515950	429410	391750
P97855	G3bp1	8546.36	4857.37	7481.96	139310	263450	233930
P17225	Ptbp1	8550.61	6952.39	6866.93	739080	659850	707980
P0C605	Prkg1	8739.04	6760.17	7124.24	943130	845240	555980
Q9CR51	Atp6v1g1	8797.29	6223.87	6931.96	219200	811250	526430
P26645	Marcks	8798.08	8085.98	10378	766930	708710	655940
P97927	Lama4	8846.71	13758.5	10197.3	658750	627680	646960
O09167	Rpl21	9216.29	19541.1	15032.7	771560	767840	713660
P62889	Rpl30	9274.95	7110.41	7064.24	559440	554850	552980
Q8R010	Aimp2	9295.64	9705.37	8194.36	1692000	1705400	1619600
O88487	Dync1i2	9458.04	13772.9	18398.5	2050400	2133700	2448200
Q60737	Csnk2a1	9505.69	13332.4	12921	1634000	1615200	2119400
Q9D1D4	Tmed10	9530.28	10187.8	10694.1	312380	518820	289700
P25206	Mcm3	9677.94	14028	14157.9	416170	713600	557730
P63024	Vamp3	9744.14	10341.3	13618.6	890350	859650	910180
P08003	Pdia4	9878.4	7194.03	7450.91	687540	712350	670800
Q91W90	Txndc5	9952.82	4056.43	4559.15	288230	283500	192860
P31786	Dbi	10024.8	18050.8	18862.7	4857200	7475400	7491300
Q61881	Mcm7	10039.1	19734.1	17628.2	646440	614890	818160
O70310	Nmt1	10043.5	22358.5	24911.6	145520	163060	151590
O35609	Scamp3	10175.3	18163.3	13022.8	876580	1082100	1120500
P62996	Tra2b	10234	19199.3	22509.4	1067000	624590	1035700
Q9Z0U1	Tjp2	10627.3	8742.72	7500.05	35911	93018	75721
Q9CQ26	Stambp	10663.9	13703	8539.02	301480	443110	268360
Q9DBY8	Nvl	11099.4	19640.3	10511.8	147320	129740	114970
Q924C1	Xpo5	11141.7	15959.3	16001.8	337970	286330	331970
P31324	Prkar2b	11206.4	30235.6	28074.2	279800	297550	274360
Q64105	Spr	11302.3	11851.4	9523.54	434420	296190	437670
P16254	Srp14	11579.6	14786.2	7290.99	1453800	1470300	1420100
Q68FH4	Galk2	11689	16799.5	12983.7	269980	298350	309800
Q8CI32	Bag5	11863.7	12466.7	10815	1108000	1087000	1054600
Q9Z1G4	Atp6v0a1	11896.8	13401.4	13319.3	530270	649530	614150
Q810B6	Ankfy1	11902	20408.5	14404.4	291650	448080	357340
P97311	Mcm6	12188.8	19568.1	29932.7	188610	121130	172580
Q61655	Ddx19a	12292.4	18089.5	14306.4	901430	780940	816720
Q3UDW8	Hgsnat	12480.8	1971.35	9355.1	279970	322270	307740
A2ASQ1	Agrn	12547.1	15301.3	11166.3	2234600	2198200	2171900
Q9Z2X1	Hnrnpf	12654.8	13912.1	12944.3	1019700	1041500	705350
Q8R1A4	Dock7	12685.7	17914.3	13531.8	208770	209740	153510
P70699	Gaa	12790.6	20079.6	12837.5	252490	261890	294960
Q80UM3	Naa15	12964.1	13528.5	16452	770240	692220	949000
Q99JX4	Eif3m	13171.7	29005.2	28303.7	970410	898200	954030
O70133	Dhx9	13227.9	16316.1	13345.5	1444700	1521900	1674000
Q99PV0	Prpf8	13254.8	14698.2	12223.9	987350	712010	1395100
Q99104	Myo5a	13280.2	9943.21	10956.5	431080	467550	475660
Q99JB8	Pacsin3	13306.8	16511.1	15573.9	681510	687790	738350
Q99M28	Rnps1	13331.2	7198.52	10027.9	548770	1038900	1146800
P47226	Tes	13534.2	20958.4	13464.4	1121400	1207200	984410
P35802	Gpm6a	13540.3	23399.6	9808.71	347450	359310	346440
P97377	Cdk2	13774.6	12312.9	14019.6	4118300	4084500	4170400
Q9EPU0	Upf1	13841	15741.7	15766.8	1888500	1789700	2053200
Q91VR5	Ddx1	13875.4	15031.7	16419.3	297850	354420	365850
Q9JJK2	Lancl2	13884.1	11611	14431.2	322880	274280	402640
Q8K354	Cbr3	13929	23872	24714.2	155670	185470	225620
P41241	Csk	14041.8	11601.5	10820.8	251470	414890	533950
Q08943	Ssrp1	14207.5	10992.9	9740.86	235180	279080	257690
Q9CPY7	Lap3	14289.2	20425.1	16109.4	3760300	3445300	3309500
Q922R8	Pdia6	14293.9	15817.4	16403.8	502890	467870	290480
O55143	Atp2a2	14443.2	11754	14231.2	665220	621730	733370
O88413	Tulp3	14528.3	11154.5	11530.6	386980	523080	444170
P35564	Canx	14740.7	9935.74	18796.7	2365400	2292500	2166200
P49717	Mcm4	14750.4	18079.9	17106.9	604090	375590	477820
Q01320	Top2a	14798.3	13495.2	14760.4	274050	355580	381970
P07147	Tyrp1	14855.7	15771.5	13734.7	7279900	5597000	6134100
Q9WUA3	Pfkp	14872.1	16658.6	12379.8	13532000	13820000	13179000
O54833	Csnk2a2	14999.4	14553.1	13927.3	156690	145480	160050
P97310	Mcm2	15088.6	15267.6	12675.4	682790	591000	630760
Q9JM14	Nt5c	15105.5	38121.5	25291.7	856700	426150	881700
Q6KAU4	Mvb12b	15146.4	25668.3	17607.9	3638700	4157400	3860100
O89051	Itm2b	15215.1	15583.3	15217.1	182190	200290	209450
Q9R0B9	Plod2	15303.4	16942.9	12881	974870	1257200	1303600
O08788	Dctn1	15532	14993.7	12992.6	711330	744270	565480
O89086	Rbm3	15715.4	13604.6	12942.1	456460	478160	425390
Q8BZ20	Parp12	15762.2	13006.7	13602.1	232000	268810	268790
Q8VDJ3	Hdlbp	15844.5	16258.3	15864.2	566290	555430	607240
P14211	Calr	16090.9	24769.5	37716.4	777900	958840	710220
P63038	Hspd1	16092.3	15776.1	8844.51	195230	187800	151090
Q91YQ5	Rpn1	16127.4	16463.4	14718.1	1410400	1453300	1366200
Q9CQT1	Mri1	16187.8	18822.7	13780.6	2046500	1432500	2147900
Q8C0C7	Farsa	16209.4	19208.8	14365.8	2092100	1926100	1923600
Q64337	Sqstm1	16514.4	45616.5	28261.7	5439900	5332900	5297700
O35226	Psmd4	16736.6	19594.5	28220.7	575370	298430	590880
Q9QZW0	Atp11c	16737.4	16010.3	10393.4	336210	304990	336500
Q3UH93	Plxnd1	16874.1	15625.8	15667	247610	321230	378800
Q60715	P4ha1	16885.1	20457.4	18613.5	164010	145700	161360
Q5SRX1	Tom1l2	16895.5	6579.63	9007.63	242560	273270	225100
Q61292	Lamb2	16939.4	10445.9	12383.9	2802900	2597400	2087100
Q60634	Flot2	17007.8	17279.7	18680.2	3013800	3047300	2903200
Q9JJ28	Flii	17045.4	19779	13192.9	1327400	1251800	1015600
Q8BMA6	Srp68	17046	7254.31	11359.5	125710	252670	264870
O88738	Birc6	17140.3	12773.3	11975.6	419660	449630	370890
Q8BYA0	Tbcd	17147.8	14154.5	18719.3	1230600	794980	879120
P32067	Ssb	17189.4	16609.5	13372.8	529250	535900	571830
Q8BML9	Qars1	17359.2	15293	13612.4	969180	1224000	1002500
P23591	Gfus	17465.3	27332.3	51315.1	2346400	1358100	2256500
P97315	Csrp1	17568.1	11600.4	15195.5	3912600	3946000	3908900
Q9WV60	Gsk3b	17793.2	18667.6	23710.7	1812100	1767800	1754400
Q04447	Ckb	17835.8	14211.1	10732.4	12983000	13618000	12958000
Q63836;P17563	Selenbp1;Selenbp2	17837.2	17140.8	11823.6	883800	888290	922310
Q9WVL3	Slc12a7	17866.8	18315.1	18649.3	3026000	3226900	3477600
Q9QZ06	Tollip	17877.5	19324.8	15528.6	757900	766940	826920
Q80UY2	Kcmf1	18251.8	27722.8	29872.8	311730	245350	233920
Q8BJY1	Psmd5	18285.6	20944.1	20376.9	353730	354230	346060
Q3UHJ0	Aak1	18336.5	24610.3	17670.2	587530	598400	601700
Q9WV32	Arpc1b	18351.8	20742.5	15882.2	900180	912650	918560
Q6P542	Abcf1	18386.5	16684.8	14122.3	429210	541920	451680
P62264	Rps14	18462.2	31495.5	27886.2	836030	706760	808100
Q9QZE5	Copg1	18604.6	17806.1	21616	523020	935990	533130
P61021	Rab5b	18618.7	15734.5	16114.8	581910	505200	558180
Q62448	Eif4g2	18624.3	19627.9	19032.2	166240	96028	129430
Q5XJY5	Arcn1	18891.2	17341.5	12637.3	259500	333980	330320
Q64324	Stxbp2	19154.9	16845.9	16647.5	393380	373380	397060
Q5SUR0	Pfas	19478.8	24214.6	17748.2	356170	399260	325400
Q91WK2	Eif3h	19733.9	22353	16751.6	1078000	833620	843710
Q64514	Tpp2	20101.6	19721.2	19751.6	2257600	1607600	2268200
Q91YR1	Twf1	20203	21228.2	21162.3	446130	444810	481830
P62082	Rps7	20206.2	18767.5	20076.7	886960	1202100	1282800
P28658	Atxn10	20256.9	18517.8	19933.4	316980	457190	496700
Q3THG9	Aarsd1	20258.5	8102.55	8153.52	1294300	958810	1043400
Q1HFZ0	Nsun2	20363.4	19204.5	15832	677410	694180	640380
P54775	Psmc4	20364	33057.9	33241.9	3270000	3277100	3481900
Q9D1G1	Rab1b	20585.2	168491	66050.8	1090200	768710	816370
O88572	Lrp6	20650.2	25379.1	19912.1	629040	2004200	1605300
P47857	Pfkm	20689.3	24226.6	18038.7	663220	512580	699180
Q8CGY8	Ogt	20717.5	20115.4	21452.9	310800	357010	335250
P31230	Aimp1	20765.2	15226.6	17812.6	1624700	1432200	1430500
Q9DCL9	Paics	20987.5	39699.7	32097.2	987560	1005000	1053900
Q91XL3	Uxs1	20999.1	31702.9	26876.4	493720	524980	551920
P48758	Cbr1	21142.2	33789.6	30504.8	913960	847580	811050
Q9ERG2	Strn3	21365.6	26513.9	25381.1	389370	522070	496620
P61164	Actr1a	21419.9	15295.1	17652	599790	653000	682770
Q99KQ4	Nampt	21508.5	23928.7	22532.3	4772300	5238700	5304600
P24668	M6pr	21642.4	20357.2	24789.9	2903400	2788200	2745700
P50431	Shmt1	21712	22445.8	17777.8	1073100	1122200	1300000
B2RXV4	Flvcr1	21841.4	21344.8	15626.8	409740	434250	423410
Q9Z1Z2	Strap	22491	18210.4	16702.3	3849800	4520900	3906300
Q6PAR5	Gapvd1	22869.3	17994.2	18333.1	178030	159700	188820
P63168;Q9D0M5	Dynll1	23167.4	51248.7	44609.6	442640	453540	459970
P31938;Q63932	Map2k1	23430.2	34338.1	32096.1	1757100	1021100	1372300
Q6PDI5	Ecpas	23433.5	22048.5	20287.1	108510	95857	132930
Q99KF1	Tmed9	23634.7	26271.4	18507.6	411330	411030	376890
Q8CFI0	Nedd4l	24035.1	20742.9	22931.2	1213900	1068200	1008200
Q91XD6	Vps36	24043.3	23945.1	24275	411400	405410	411310
O08810	Eftud2	24099.8	25336.7	20303.1	611500	746670	584720
Q6P4T2	Snrnp200	24279.3	30353	23288.2	397240	290130	504310
P84104	Srsf3	24325.3	59473.6	65544.6	1796200	1752600	1823200
Q8JZZ7	Adgrl2	24422.2	26015.2	27033.8	2080900	1806200	2060700
Q6A0A9	FAM120A	24472.6	25926.2	26806.7	1039000	1852800	2187900
O88447;O88448	Klc1	24677.8	18052.7	19648	236370	173180	195210
P40142	Tkt	25185.5	24465.4	16633.5	793400	395990	358700
Q9DCH4	Eif3f	25245.7	24029.5	24994.4	838600	1069800	938700
F8VQB6	Myo10	25549.5	22076.7	22296.2	671160	619930	632330
P56480	Atp5f1b	25565.1	17404.3	16090	559910	294040	258420
Q8K0C9	Gmds	25592.2	17681.7	19267.4	243270	232650	220280
Q8R5C5	Actr1b	25610.7	22961.7	27640.6	365600	350220	289860
Q6P5F7	Ttyh3	25732.1	31293.2	20751.6	2240600	2199600	2421100
Q99KJ8	Dctn2	25824.6	23810.4	18322.6	313250	409280	229810
Q8K1M6	Dnm1l	25988.6	29637.7	26956.2	339650	255750	239920
O35379	Abcc1	26021.3	23173	23948.4	228510	294620	214980
Q9JKR6	Hyou1	26680.8	24851.5	25617.9	289060	259370	285810
Q3UPL0	Sec31a	26854.3	36535.7	28607.3	584260	724790	788310
O88746	Tom1	26942.1	26567.2	28936.7	244080	458750	225760
P62814	Atp6v1b2	26996.6	26646.1	23267.1	854990	978370	987250
P17918	Pcna	27321.8	23029.2	37240.1	80660	117140	302510
Q9QYI3	Dnajc7	27338.1	19553.8	25344.8	476740	659550	500950
Q91W50	Csde1	27366.2	29059.9	23242	556210	498370	555140
Q8CI59	Steap3	27603.3	19129.1	17649.4	214200	192300	205300
P26516	Psmd7	27807.3	24914.3	30151.1	2153300	2180300	2495800
Q61543	Glg1	28005.5	26137.8	30238.4	143050	152680	161010
Q99MN1	Kars1	28519.2	22474.2	23775	267520	733570	527050
Q6PHZ2	Camk2d	28724	20452.9	23053.3	914240	923660	1105200
Q9Z1E4	Gys1	28735.3	27390.1	27217	1360400	1027300	985600
Q9QYB1	Clic4	28868.5	32673.6	38809.9	1554700	858630	1111600
Q8BH00	Aldh8a1	28944.6	34340.6	32213.5	1251200	1243500	1324600
Q99KP6	Prpf19	29044	29860.6	28374.9	206460	193290	189810
Q8R1Q8	Dync1li1	29277.8	33443.7	27725.7	3106200	3061500	3191700
Q99LF4	Rtcb	29291.7	24235.3	26493.7	442210	423480	134310
Q05D44	Eif5b	29299.2	29968.8	31648.1	535960	476580	573230
P46735	Myo1b	29336.5	38277.5	39520	1230700	1317500	1130200
Q8K1A6	Cc2d1a	29531.2	22499.8	22469.4	205850	199460	236570
Q9R0E2	Plod1	29747.6	32887.1	36246.8	1322300	1248400	1232000
Q9JLQ0	Cd2ap	29916.7	34646.2	34477.5	3457100	3217500	3155900
P57776	Eef1d	29957.2	41521.2	55062	2001700	2254300	2117300
Q3UDE2	Ttll12	30112	34806.6	36445.2	476760	548350	503110
P18242	Ctsd	30161.3	15867.4	22616.4	1442400	1232900	1459000
P63276	Rps17	30312	30132.1	24598.9	3301500	3681400	2755200
P24369	Ppib	30448.8	23339.5	32347.9	1052400	1078800	1048400
P11152	Lpl	30457	28380.9	28660.4	157590	166040	101240
P49312	Hnrnpa1	30754.4	37948.8	49174.8	304430	336180	232690
P61222	Abce1	30765.1	28676.5	31196.2	2781800	2477100	2367500
Q9EQH3	Vps35	30798.6	21682.4	25555.2	978500	1193300	1623700
O08688	Capn5	30962.4	33015.5	27744.1	476190	360370	438790
Q3TXS7	Psmd1	31145.4	45032.7	41207.5	2098800	2686700	2238500
Q7TPV4	Mybbp1a	31610.6	39275.7	25357.4	359430	301220	412310
P17156	Hspa2	31680.1	67606.2	73151.9	327150	420850	248060
P61979	Hnrnpk	32036.2	43724.2	42891	2025700	2329700	1880500
P83940	Eloc	32080.9	23465.5	22301.2	1963600	1742300	2082400
Q62433	Ndrg1	32754.5	36702.5	45720.6	794040	798800	817700
Q78PY7	Snd1	32992	35994.9	41873.4	8112300	7807100	7947600
Q63844	Mapk3	33148.6	35715.8	32740.9	1482900	1315100	1592000
E9PVA8	Gcn1	33218.3	28111.4	28438.1	869730	780920	847920
Q02248;Q02257	Ctnnb1	33363.8	38922.4	38149.8	920030	914630	933360
Q8VDZ4	Zdhhc5	33521.6	35789.4	28530.1	269190	282370	289660
Q6ZWY8	Tmsb10	33748.3	53106.3	46627.1	3935600	4054900	4464700
Q9ER00	Stx12	33901.3	31459.8	36199.6	1189200	1459000	1012900
Q80U72	Scrib	33961.8	29206.5	23693.8	469800	516810	447120
O55131	Septin7	33986.5	52437.9	49268.8	2796000	2701000	2781200
P35282	Rab21	34058.5	28458.5	31367	812250	571480	471980
Q6IRU5	Cltb	34477.7	26785.7	25696.2	1893200	2493400	1571500
Q9QZD9	Eif3i	34645.1	32903.7	34628.8	3187300	3161800	2954900
Q64430	Atp7a	35031.7	29414.3	32947.9	1111000	1104900	1143600
Q9WVA3	Bub3	35045.3	27281.4	31005.8	905640	867010	968360
Q5SWU9	Acaca	35311.6	32037.2	36476.2	2005300	2157400	2254700
Q9D7S9	Chmp5	35314.2	31216.4	34371.4	1505800	1613200	1628100
O35593	Psmd14	35562.8	41030.6	58373.5	1235100	1297400	1339900
P20352	F3	35662.4	43125.4	47261.9	492990	509620	466830
Q60875	Arhgef2	36067.8	40351.8	36723	552570	181210	74343
P08207	S100a10	36083	27133.8	30726	1247400	1031600	1005900
O55106	Strn	36121	37302.8	32827.7	185730	218840	173630
Q9QZI8	Serinc1	36652	38198.5	33128	896230	861810	872640
Q7TMY8	Huwe1	36804.5	39030.4	29702.6	148690	88472	100280
O08917	Flot1	37071	36000.6	35034.6	2708400	2708900	2813100
O55135	Eif6	37149.1	50702.7	44299	439500	307650	431740
Q8CIB5	Fermt2	37164.4	35701.6	38050.2	459190	333700	396360
Q9CPR4	Rpl17	37789.6	40115	34633.7	5047300	5352300	5661300
Q8CBW3	Abi1	38199.4	42491.3	43707.5	806330	672840	614960
Q9CZ30	Ola1	38272.6	36902.8	33951.4	441790	359200	231480
Q9JLJ2	Aldh9a1	38280.2	41542	42737.9	2607900	4016300	3586000
P29387	Gnb4	38457.6	28035.8	36167.2	126940	131880	141950
P09405	Ncl	38802.7	32191.6	32121.6	842390	671800	831640
P70206;Q80UG2	Plxna1	38853	36105.3	36848.3	948140	960760	892460
Q3TW96	Uap1l1	39039.7	31958.1	47537.8	262030	232050	252210
Q68FL6	Mars1	39291.3	33855.3	29047.3	1540900	1799900	1620800
P20029	Hspa5	39549.9	36538.8	35241.6	10396000	10235000	10678000
O08529	Capn2	39679.6	45249	33381.9	243890	148120	202700
O70194	Eif3d	39893.7	33593.6	29292.6	1424600	2264000	2248000
P62301	Rps13	40032.9	62283.7	56718.6	2140800	2149400	1247100
Q6PB44	Ptpn23	40057.1	36234.3	45031.3	1485400	1071200	1031700
Q63844;Q61532;P63085;Q6P5G0	Mapk1	40129.3	57506.8	56528.9	1146400	644520	1024100
P57780	Actn4	40376.8	50506.7	43674.6	226850	199610	204360
P26043	Rdx	40913.6	40945	35697	398750	467920	449130
P62137	Ppp1ca	41207.7	82733.8	76847.9	2805700	2410900	2285000
P24547	Impdh2	41586.6	58705.9	51195.8	776170	721880	554440
Q9WVG6	Carm1	41742.8	28154.8	37252	357740	364770	354040
Q9D8W5	Psmd12	41790.9	35217.4	39357.9	2526300	3003300	2735100
Q99JI4	Psmd6	42250.4	65785.2	58444.4	1615400	1824200	1764100
Q91VC3	Eif4a3	42292.9	31944.5	37154.8	632860	750690	749360
Q9CQ80	Vps25	42655.6	84398.6	48991.3	1159500	1079200	1027400
Q91ZJ5	Ugp2	42708.9	44326.1	31096.2	1188000	962710	925170
Q61553	Fscn1	42948.1	42572.3	81458.3	160600	154460	146170
P99027	Rplp2	43047.5	70167.7	66245.4	2704600	2819200	3423200
Q6NZJ6	Eif4g1	43371.4	39163.5	33746.6	832310	820540	744550
Q3THS6	Mat2a	43690.7	32310.4	29025	1321500	1291000	1310900
Q9D0E1	Hnrnpm	43710.4	41725.8	32040.2	428450	439100	327730
P47911	Rpl6	43884.9	38466.8	36478.3	3572300	3655800	3034700
Q61072	Adam9	44064.2	41315.7	37938.1	710410	717840	769880
Q9DBZ5	Eif3k	44115.7	50680.9	56560.1	838930	961530	779020
P27659	Rpl3	44678.6	88556.4	76787.1	6646800	5486200	5486600
O70475	Ugdh	44729.1	56630.9	48330.2	2053500	2096100	1956700
Q3UH60	Dip2b	45081	48743.4	43602.9	9346600	8941500	9691200
Q80W68	Kirrel1	45293.1	45753.1	42007.1	429350	390950	426560
Q9Z2U1	Psma5	45865.5	49685.9	49431.2	583160	614900	463500
P30412	Ppic	45895.5	40941.2	39959.9	2394700	2602400	2526400
P97461	Rps5	46199.5	50923.2	43876.1	2388100	2399100	2944600
Q8BMJ2	Lars1	46274.1	41849.7	40909.7	5307600	4447200	5290200
P28474	Adh5	46335.8	62885.2	58949.8	2715800	2673000	2623900
P33175;Q61768;P28738	Kif5b	46452.7	41699.8	50368.6	4466700	4647800	4270000
P06745	Gpi	46548.7	59484	42165.7	5430400	5108800	5104400
P70398	Usp9x	46583.9	54948.3	48020.9	1365800	1412500	1128200
Q9WUM4	Coro1c	46869.6	52519.3	36568.2	332480	437500	133450
Q9QXB9	Drg2	47550.2	36975.6	35383.5	148770	182720	147730
P10630	Eif4a2	47558.4	51709.6	55217.1	453680	522140	496580
P46935	Nedd4	48023.6	49170.5	46094.8	1932000	2000200	2016400
P35979	Rpl12	48071.3	48367.7	53143.8	1341000	1467500	1071800
Q8BK67	Rcc2	48204.2	36492.4	37268.7	1797600	1526200	1340800
Q3UPF5	Zc3hav1	48211.4	39688.6	40073.3	841700	1327400	886970
P52293	Kpna2	48301.1	70665.2	69328.1	882540	832960	1008500
P50580	Pa2g4	48556.1	43949.6	42388.1	1370400	1420800	1067500
Q6P1B1	Xpnpep1	48566.4	44299.2	44889	1931500	2033800	1947500
P23116	Eif3a	49059.4	51735.3	48157.8	2152300	2325000	1976400
P39054;Q8BZ98	Dnm2	49083.5	52093.6	43835.7	1350300	1213500	1346600
P62196	Psmc5	49091.4	51201.8	52009.8	4518400	4508600	4579800
Q8QZY1	Eif3l	49487.4	47739.2	51395.8	2173500	2501800	1994900
Q3TWW8	Srsf6	49492	47908	38411.4	1633600	1669400	1666000
Q9WVJ2	Psmd13	49494.4	49609	48455.4	1577500	1395300	1492200
Q8BU30	Iars1	49532.7	49389.4	47238.1	5969700	5765500	4908700
P63242;Q8BGY2	Eif5a	49567.3	56898.5	53536.8	1048600	747130	921000
P27773	Pdia3	49592.8	36372.2	34463	2990600	2480000	2844300
P19253	Rpl13a	49872.5	58454.6	58069.4	2498900	2486000	2525300
Q9D0I9	Rars1	50077.6	47637.8	41989.8	2092800	2136400	2225200
Q64374	Rgn	50129	43642.8	39136.1	3341400	3331500	3317700
O08848	RO60	50484.9	61990.1	59561.7	776260	863720	1053300
P56399	Usp5	50879.6	53564.2	55507.2	4976600	4674600	4291400
P60867	Rps20	50918.8	43208.1	44813.5	872340	1361600	1138800
Q9ERK4	Cse1l	50922.4	43617.3	48422.4	440300	363230	414620
P63323	Rps12	50990.5	63309.3	53814.3	952190	703720	915290
P47856	Gfpt1	51042.9	56759	54259.6	2064500	1993700	1753700
Q8VEJ9	Vps4a	51277.1	51896.4	52279.1	465450	477050	424640
P53026	Rpl10a	51415.3	46027.5	35887.6	6240500	4857300	5135700
Q9WUD1	Stub1	51458.2	46899.2	47269.6	975900	868140	819950
P17427;P17426	Ap2a2	51466.5	45410.3	41594.2	143980	175540	145760
P02468	Lamc1	51745.2	67664	72012.6	1504800	1091500	970880
P17751	Tpi1	51953.5	70163.7	75028.6	29110000	26086000	29353000
Q8CGC7	Eprs1	52164.7	63160.6	55384	17417000	14717000	13839000
Q6P5F9	Xpo1	52585.9	58132.3	63100.4	268720	165570	154920
Q00612;P97324	G6pdx	52668.7	37002.2	42695.2	646260	580710	469170
P19324	Serpinh1	52970.7	44434.4	47055.4	1022700	1126800	906250
Q60973	Rbbp7	53138.8	46219.8	37456.2	1084600	968510	1409400
O08547	Sec22b	53551.9	139658	134512	347180	509770	333980
P12970	Rpl7a	54039.4	59422.1	54201	3963900	3861700	4015800
Q7TT50	Cdc42bpb	54197.2	55658.3	55810.1	731450	544560	564200
Q61739	Itga6	54287.3	40792.7	42746.6	7257500	7919900	8791300
P55258	Rab8a	54652.5	47912.8	47307.3	1777200	1675600	1779200
P62192	Psmc1	55089.4	65153	58078.3	3484700	3330100	3516200
Q9Z0N1;Q9Z0N2	Eif2s3x	55156.2	47044.5	45623.3	429250	539410	540860
Q8JZQ9	Eif3b	55641.2	63045.2	61197.6	1676300	1514700	1756300
Q8BHZ0;Q921M7	Cyrib	55668	73997.6	61614.8	489790	481580	399460
O55029	Copb2	55726	48979.7	42722.8	881830	888590	807800
Q9CZD3	Gars1	55859	52313.5	54800	2698800	2706900	2730900
Q6ZQA6	Igsf3	55865	52226.3	54700.9	7203700	6841200	6668500
P07742	Rrm1	56260.3	38523.8	48494.7	1881600	2165900	2212000
O35474	Edil3	56372.6	68953.9	70660.6	2851400	2754100	2703500
Q99J77	Nans	56404.6	51391.3	58380.9	1304900	1458600	1249500
P58021	Tm9sf2	56764.3	59241.7	53787.6	758840	777000	752070
P61027	Rab10	56920.1	79516.3	72444.2	1819400	1695200	1808600
Q8R1F1	Niban2	57016.1	54851.8	62656.4	567640	658420	528040
Q64737	Gart	57590	51647.9	59625.9	2164600	1906800	1932100
P09103	P4hb	58070.1	47180	38181.4	3123400	2957200	3179800
Q91WG8	Gne	58675	47020	40271.8	653580	767150	786670
P11440	Cdk1	58774.3	58681	58879.5	2307400	2232600	2302900
P14685	Psmd3	59386.9	60794.3	52515.2	1151100	1476600	1455000
P61161	Actr2	59516.9	86012.9	75751.2	518300	510640	374510
P97351	Rps3a	59549.6	61486	57093.4	6067900	5100400	6162800
P62281	Rps11	59832.4	238852	204535	5001200	4994800	4961800
P18654	Rps6ka3	59836.2	61702	60335.4	1009200	971340	781020
Q8VDM4	Psmd2	60093.2	59941.4	51959.7	3278000	3829800	2796600
P26638	Sars1	60129.8	54816.3	55596	1195500	1132500	1422400
P08113	Hsp90b1	60516.7	60124.6	57191.3	5594700	5947600	5352900
Q8CDN6	Txnl1	60645.1	73344	69436.8	441920	408980	420810
B2RQC6	Cad	60657.6	65301.7	54569.9	9989800	9964200	9939100
Q6ZQ38	Cand1	60759.4	64441.1	49832.9	301150	255870	530730
P47955	Rplp1	60852.7	53565.1	55545	2196800	2036000	2211000
Q9WVE8	Pacsin2	60898.3	72854.8	64338.8	2173500	2974800	2676500
Q9JKF1	Iqgap1	61030.4	54159.9	49768.3	710530	786310	718880
P62717	Rpl18a	61712.6	64186.9	74752	4408300	5723600	5528200
P28660	Nckap1	61723.2	60983.1	53070.3	1106200	982480	1117100
P26040	Ezr	62071.8	65347.9	66729.9	228440	218080	149950
P50516	Atp6v1a	62347.6	64019.8	63810.9	2114500	2266300	2004300
P70168	Kpnb1	62717.6	65512.1	65717.2	872430	854680	1092100
O70439	Stx7	62736.4	50111.5	52292.2	2763200	2703600	2869600
Q6P1F6	Ppp2r2a	62773	82347.1	72775	888570	1378400	1394600
Q9DBG3;O35643	Ap2b1	62982	52359.1	58198.2	189640	167310	43019
Q8BT07	Cep55	63003.3	74703.6	71308.1	2100000	1827300	898710
Q62167;Q62095;P16381	Ddx3x	63043.1	95430.5	89445.6	1310800	1762900	1510000
Q9CXW4	Rpl11	63386.9	47934.1	45698.7	4123500	4125400	4008400
P62245	Rps15a	63403.3	115686	115283	496980	1093200	764350
P61255	Rpl26	63567.2	91480.1	80675.7	812930	1772900	2439300
P42208	Septin2	63817.3	64451	73335.5	1974900	2000800	2399700
P70452	Stx4	63905.9	78363.8	52895.9	656350	703520	629360
P62334	Psmc6	64115.5	62986.3	86798.5	4803100	5004700	4302200
B2RXS4	Plxnb2	64271	75292	67568	714220	766940	769780
Q8BKC5	Ipo5	64345.9	57681.5	50990	96161	66741	103450
Q61301;P26231	Ctnna1	64606.9	59481.5	59709	338690	331310	363690
P25444	Rps2	65789.1	59804.7	47275.3	5788800	5426000	4745100
P61226	Rap2b	66328.7	50992.6	51485.7	2559300	2535200	2459000
Q9CZM2	Rpl15	66371.7	100589	85129.4	3577100	3846600	3943600
Q8VEK3	Hnrnpu	66549.8	78013.7	71636.4	6900600	6154800	6000200
Q9Z1Q9	Vars1	66815.2	84403.2	67667.1	8158200	9624900	9306200
Q99JY9	Actr3	66924.8	110551	87803.8	4147700	5138700	4317500
A2AN08	Ubr4	66969.8	69038	64857.4	2381700	3328700	2748100
Q62093	Srsf2	67162.6	36692.5	42334.3	1251600	1360900	1355700
P62918	Rpl8	67581.4	58511	50069.3	3334900	3528300	3877500
Q61316	Hspa4	67830.6	68007.7	66265.7	1262000	1514300	1404800
P60122	Ruvbl1	67847.6	76704.3	78547.6	1326300	1258700	1306900
P83510;Q9JM52;P97820	Map4k4	67994.6	57412.3	52748.6	1599300	1535700	1474600
P63321	Rala	68106.6	80596.3	86944.5	521270	454870	479060
Q9R1Q6	Tmem176b	68328.5	81427.3	81516.7	1113600	1125000	1092000
Q8R1B4	Eif3c	68633.3	71957.2	68344.7	3214600	3250800	3448700
P47753	Capza1	68651.5	56379.7	65615.4	2312400	2069800	2067900
Q9CYL5	Glipr2	69000	48983.8	49781.2	550870	564380	581040
Q8R105	Vps37c	69539.5	80331.6	64675.5	2874200	2853500	2899100
P47962	Rpl5	69626.1	74728.4	62702.9	2630400	3253200	3661600
P14148	Rpl7	69639.1	84462.1	77710.8	6464800	5874300	6241100
Q07797	Lgals3bp	70190.3	128792	140352	3917000	1185100	1602800
P14824	Anxa6	70305.2	61734.4	61953.9	3630000	3474100	3710700
Q8BL97	Srsf7	70874.6	64379.7	68427.1	1212100	1265100	1309100
Q9CR57	Rpl14	71185.4	59362.5	60852.2	1508200	1017100	1526300
Q9JIM1	Slc29a1	72685.8	82528	103090	140210	131930	152540
Q07113	Igf2r	72944.9	71003.4	57046	1681900	1472800	1503600
Q61699	Hsph1	73011.2	64927.5	65884.1	74759	73372	97944
Q922B2	Dars1	73104.9	75923.7	73823	7144000	6927200	7313000
P70698;P70303	Ctps1	74396.5	79481.8	64940	1046700	1139500	1099500
Q8K2Y3	Eva1b	74617.9	45304.5	82592.8	3732300	3554800	3556700
Q6P9J9	Ano6	74900.6	58034.2	60750.8	830610	855670	858550
Q9Z127	Slc7a5	75049.7	87753.3	99245.3	2604100	2681000	2569900
P97429	Anxa4	75102.9	78654.1	80544	4469900	4294800	4744300
Q8CIE6	Copa	76041	74576.7	71228.6	2046200	2140300	2599600
Q9JII6	Akr1a1	76906.2	69680.3	65836.4	5992800	5894200	5906400
P80315	Cct4	77344.4	67484.3	82980.8	11510000	11670000	12033000
P19157	Gstp1	77400.2	132524	97248.7	5568000	6156800	4377800
Q01149	Col1a2	77450.2	147133	156365	195370	216470	225190
P10605	Ctsb	77660.5	82178.9	71017.4	575540	402340	527570
P80313	Cct7	78072.7	59316.7	63021.1	6805000	6564500	6970200
P84096	Rhog	78102.7	89854.4	78782.8	2717600	3058800	2987400
P14206	Rpsa	78617.8	86789.1	84432	18758000	19127000	17050000
Q91W53	Golga7	78857.5	64689.4	57122.1	513890	515190	522960
P30999	Ctnnd1	79180.4	80473.2	71872.8	1789500	1406500	1608600
P97333	Nrp1	79912.5	67995.9	73449	1303800	691820	1307700
Q61656	Ddx5	80180.8	75366.3	73957	648750	572000	809110
Q8CI94;Q9WUB3	Pygb	80360.1	77027.3	83749	1119300	1164700	909630
P21278	Gna11	80377.8	63838.9	66891.3	1506800	1529200	1039300
Q80UG5	Septin9	80483	98801.4	91258.1	866490	676320	752670
Q6ZWY3;Q6ZWU9	Rps27	80723.5	58032.8	60150	1792600	2238900	2485200
Q9QZF2	Gpc1	81045.6	79647.1	89201.6	919190	1190500	1216000
Q9ET01	Pygl	82034.6	82517.5	73752	1457400	1511500	1447900
Q8BGQ7	Aars1	82037.3	80098.5	92008.7	4161100	3894400	4432000
P35279	Rab6a	82133.5	138294	132770	1334300	1200700	1162300
O09044	Snap23	82210	56478.4	80591.2	732820	417280	676130
P84099	Rpl19	82364.6	75532.9	64189	1626200	1411600	1348000
Q9R0P3	Esd	82918.9	134762	123530	1243200	1227200	1291900
Q91WS4;O35490	Bhmt	84557.7	65822.6	77631	1615700	1587700	1645000
O08585	Clta	84832.1	96384	87864.7	17493000	12984000	16404000
P55258;P61028	Rab8b	85232.4	78414.2	77074.5	845400	827390	770160
P61982	Ywhag	86609	115833	102766	2756600	2270400	2121100
Q8QZY6	Tspan14	87831.8	71492.2	72257.2	1715200	1748300	1801100
P47877	Igfbp2	87906.3	140556	125990	975600	956590	976290
Q8BG32	Psmd11	87921	85004.6	78200.2	3666000	4140100	4309800
P20152	Vim	87931.9	82475.8	87109.5	23304000	30315000	29801000
O35737	Hnrnph1	88392.4	79709.8	76749.1	1768500	1503100	1663300
Q04736	Yes1	88447.4	132627	130832	1353400	1249700	874410
P14152	Mdh1	88839.2	96878.7	91488.7	899610	980860	1002300
Q9CR26	Vta1	89473.8	87344.9	64552.1	3443300	2846200	2476300
Q922D8	Mthfd1	89665.5	67606.3	72514.9	7205900	7876000	6856900
Q9WTM5	Ruvbl2	89856.4	90458.6	86280.5	3698100	3379800	3595000
Q9D8E6	Rpl4	89887.6	96474.1	78441.5	8773700	7921600	7936900
Q80SW1	Ahcyl1	90082.6	78622	86739	615260	427900	376870
P40124	Cap1	90426.8	86019	71140.1	387620	437400	411810
P54116	Stom	90533.7	107231	127139	1124200	990130	926290
P63005	Pafah1b1	90711	94836.6	86762	1216300	1259600	1258500
P11370	Fv4	92037.6	141703	123636	52972000	50272000	49695000
O35375	Nrp2	92989.2	90936	97517.4	1673600	1500400	1783500
Q7TMB8	Cyfip1	93160.5	92704	87906.5	380800	1037700	903480
Q9CX00	Ist1	95103.8	104038	124851	2354100	2246200	2309800
P35762	Cd81	95145.1	117390	99886.1	40406000	39829000	39052000
Q76MZ3	Ppp2r1a	96055.3	91375.4	87844.8	816120	1016500	1070900
P80314	Cct2	96803.7	102086	103448	12927000	13802000	13263000
P47754	Capza2	98747.3	100176	90096.8	1530700	1683600	1662800
P19096	Fasn	99025.8	90956.1	103776	31815000	30706000	31623000
P47757	Capzb	99215.3	117657	115920	478640	657500	603090
Q9CQD1;P61021;P35278	Rab5c	99649.6	135457	116194	2701900	2755000	2646300
Q8BP47	NARS1	100174	110725	106804	2598400	2366500	2191000
P47963	Rpl13	100821	78407.1	91588.8	3351300	2967900	3038900
P60229	Eif3e	101935	49911.8	65543.6	964290	771130	920080
Q61024	Asns	104975	89159.7	82966.3	5224700	5115400	5129500
P23249	Mov10	105192	156862	147584	5689200	5486800	5633000
Q9D1C8	Vps28	105949	109288	97131.3	5056100	5050300	4886800
Q9WVA4	Tagln2	108274	270360	128163	254740	252790	257830
P46471	Psmc2	110216	94517.1	94209.3	8528100	8259400	7747300
P62702	Rps4x	110874	75817.5	98059	3472000	2606600	4261800
P11983	Tcp1	111794	116052	116427	9896200	9310200	9420200
Q9EQP2;Q9QXY6	Ehd4	112923	93389.1	92749.7	1668700	1599900	2120900
Q91V92	Acly	113273	120401	126166	8832900	8232800	8622000
P63330;P62715	Ppp2ca	114464	106938	110520	1314400	1090700	1134700
P08030	Aprt	116162	113864	92795.9	1866800	1306500	1831900
O88322	Nid2	116414	140412	129710	213890	190480	214510
Q8K2Q7	Brox	117193	105329	109815	1116500	1484700	1441800
P14131	Rps16	118497	95393.3	181845	2713800	2423900	3200600
P68040	Rack1	118844	113008	105656	12005000	11620000	12148000
P86048;Q6ZWV3	Rpl10	120171	123701	70889.5	4881200	5565900	4605500
P59999	Arpc4	121942	166784	180170	512700	518100	473370
Q9D8N0	Eef1g	124573	187553	203626	7821800	8730300	8112100
Q6X893	Slc44a1	126565	161402	113990	232060	257760	249080
Q6PHN9	Rab35	127209	118838	147872	667140	723170	650450
P12382	Pfkl	129095	141459	136505	12019000	11314000	11553000
Q60864	Stip1	129418	120830	117252	709620	411950	2818300
O88685	Psmc3	129574	148646	132423	3934200	3839100	4097000
Q02053;P31254	Uba1	129894	129688	123974	21429000	22929000	22470000
P14869	Rplp0	130580	96203.6	114342	5936200	6237000	6072100
Q8R0J7	Vps37b	131172	83918.2	104192	3978000	4330100	4137500
P35980	Rpl18	132306	85034.4	99205.5	4061800	4045000	3937700
P46467	Vps4b	133317	168028	150480	4097400	4033100	4046000
P17879;Q61696	Hspa1a;Hspa1b	134545	145360	128181	3609800	3469600	3848000
Q61753	Phgdh	137502	216297	186964	12792000	11794000	12482000
P07901	Hsp90aa1	139098	142630	154535	14117000	14135000	14624000
Q9QYJ0	Dnaja2	139376	159250	154234	10636000	10770000	10714000
Q9JIW9	Ralb	139739	147114	178496	1394500	1380700	1429900
Q3TH73	Ttyh2	142470	149429	153930	1790100	2025900	2007600
P62754	Rps6	143017	125443	125538	7059700	6941300	7078300
Q09143	Slc7a1	144376	226098	270542	4638300	4999500	3181800
P80316	Cct5	145546	108102	111583	11378000	11411000	11179000
Q62351	Tfrc	145714	140492	136251	2998100	3206400	3000600
P29341	Pabpc1	146499	150738	147778	11798000	12589000	11822000
Q60790	Rasa3	147056	133513	137679	2005500	2158500	2110600
Q9D2U9;P70696;Q8CGP0;Q64525;Q6ZWY9;Q8CGP2;Q64524;P10853;Q64478;P10854;Q8CGP1;Q64475	H2bc12;H2bc4;H2bc7;H2bc9	147402	156404	146425	9890800	7692100	7189700
Q9D0F9	Pgm1	149376	137979	144925	1604700	1417600	1260300
P05064	Aldoa	149910	159737	143804	16982000	16237000	17948000
P62835	Rap1a	151938	190547	209122	655310	677510	627320
P97384	Anxa11	154364	159390	160303	7786000	8067800	7870000
Q07076	Anxa7	154407	101768	117146	2493500	2329600	2400700
O08553	Dpysl2	154592	122954	120415	4766400	4660600	4648400
P60843	Eif4a1	156141	154837	151026	9446600	10021000	8433500
Q6PDM2	Srsf1	156466	114740	129218	2048900	2128200	1887500
Q9CQ65	Mtap	161312	171826	141802	1137000	1494900	1563700
Q9Z1T2	Thbs4	162152	193751	201093	1239200	1324900	1275100
Q9EQK5	Mvp	164070	106207	120007	4302400	3534500	3803000
P62242	Rps8	165176	139746	134521	12656000	12891000	12427000
P80317	Cct6a	165856	154130	145196	10060000	9396800	9265500
G5E829;Q6Q477	Atp2b1	165864	168412	175043	1731300	2393400	2050500
P16460	Ass1	166976	139019	141658	1989400	2341900	2356200
O88342	Wdr1	167680	188746	188929	7794800	7933000	7373200
Q9WTI7	Myo1c	168408	184979	177289	5121300	5569400	5838900
Q99JW4	Lims1	169697	159819	157928	396370	435470	432970
P16045	Lgals1	169709	166397	166234	4194300	4510600	3511700
P80318	Cct3	170261	167247	160763	10523000	10872000	10917000
P68254	Ywhaq	171872	212100	260190	4349100	4665700	4630500
P23242	Gja1	172741	158184	150479	566060	588440	588240
P08226	Apoe	173493	181026	191519	25147000	25134000	24626000
Q78HU3	Mvb12a	175232	156069	168189	3021200	2831400	2846900
P48193	Epb41	175615	140580	158167	417960	557600	456620
P63037	Dnaja1	177240	176779	207012	6676600	6624900	6565400
P14115	Rpl27a	180911	159908	145239	1039000	1202100	1117100
Q61598	Gdi2	181578	174931	177076	2434200	2034500	1884300
P62908	Rps3	182534	145600	146368	11746000	11542000	12692000
Q9DB34	Chmp2a	182884	119138	151725	1198400	861160	1165700
Q9CQV8	Ywhab	185146	214540	189727	4434900	4812300	4704200
Q9Z1R3	Apom	185359	175288	152128	1449100	1386700	1386200
O08709	Prdx6	187078	223321	206332	577470	934370	772380
Q91V41	Rab14	190620	232546	225277	2925800	2954500	2464200
O35598	Adam10	190660	134178	194613	1220600	1014700	1012500
Q8BH61	F13a1	191124	166269	181000	1150500	1154500	1087400
P68372;Q9D6F9	Tubb4b	191438	185631	214842	171140000	181590000	162060000
P60335	Pcbp1	193456	175065	177480	8776400	8691400	8215600
Q01853	Vcp	200615	228732	220634	9165200	8973800	8748600
Q60605	Myl6	201843	180044	223584	3393700	3468200	3766200
P58252	Eef2	202175	239608	221213	17326000	17368000	18190000
P42932	Cct8	202700	151899	162638	13127000	13233000	14397000
Q91VH2	Snx9	203431	218506	202718	202430	285790	230000
Q9CWJ9	Atic	204529	185953	179551	6059100	5273600	6186900
Q99K85	Psat1	205224	246042	220410	363090	649120	377130
Q6ZWN5	Rps9	209055	197094	205341	2864800	2719600	2691700
Q9Z1Q5	Clic1	214539	220677	205586	3842300	3815900	3868200
Q61990;P57722	Pcbp2	216239	143261	183360	2000500	2036200	2054600
Q9JHU4	Dync1h1	216849	219142	218466	28305000	26831000	26862000
P35700	Prdx1	220540	156150	271001	1950600	1268100	1429900
P45376	Akr1b1	220577	197540	179873	4942400	5147500	4842100
P28656	Nap1l1	222754	197036	185376	2628600	1846200	1698600
Q9D8B3	Chmp4b	229144	251851	241039	4897500	4998400	5170200
P45591;P18760	Cfl1	230485	258116	193530	16508000	17191000	17492000
Q9DAS9	Gng12	232725	152262	141450	4845800	3397400	2593300
P32883	Kras	233210	239270	222860	799620	1575300	763690
Q8BJU2	Tspan9	233758	236968	302095	3847400	3869800	3760200
Q8CFE6	Slc38a2	234115	177587	192014	1692100	1778900	1831200
P97370	Atp1b3	235532	217354	203744	2714700	3157200	3014300
Q91ZX7	Lrp1	236443	249911	243986	4542300	4447400	4716800
Q61187	Tsg101	238598	238220	220053	4092700	4924400	7200800
P62962	Pfn1	239100	280833	261215	2514500	2893300	2378900
P12815	Pdcd6	243573	184281	194979	3300600	2712200	3172500
Q9QXY6	Ehd3	245368	242979	246327	957500	851560	968140
Q9DC51	Gnai3	245978	260386	230198	4422200	4429600	4297800
Q64727	Vcl	253115	221924	220293	378240	489110	504960
P10493	Nid1	256994	293726	291882	337340	386110	302910
Q8R366	Igsf8	262055	208649	198218	177610000	175130000	177820000
P62492;P46638	Rab11b	266569	274812	282259	2051200	2064200	2543600
P51912	Slc1a5	269878	241253	248750	2159500	2089100	2259500
Q9ERD7;Q922F4	Tubb6	271071	172070	174956	951610	756910	736530
Q62465	Vat1	271467	193454	203642	3349000	3650500	3245600
P62827	Ran	271731	297878	292061	18826000	18314000	18273000
P60766	Cdc42	275318	206015	288345	7476100	8467200	6588900
P17182	Eno1	281119	263487	197314	87949000	84744000	91958000
P62874	Gnb1	285314	394946	445184	14674000	13773000	14092000
P63094;Q6R0H7	Gnas	297300	356500	389754	6675000	5857500	5863800
Q99PT1	Arhgdia	304281	305862	385451	5237300	5329600	5102200
P16627;P17879;Q61696	Hspa1l	305665	503911	472721	1156600	916610	896270
P21279	Gnaq	310455	342628	340211	408940	437540	428180
Q9DBJ1	Pgam1	313525	338634	332316	71546000	73885000	71166000
Q9R0N0	Galk1	319582	327190	340278	7446400	7350800	7702100
Q9QXY6;Q9WVK4	Ehd1	325772	367625	360216	6981000	6222400	7181900
P62259	Ywhae	326187	302207	344346	7105300	8763100	8757600
P48036	Anxa5	326486	299072	291301	12259000	16870000	14985000
P09411	Pgk1	329237	335908	311414	29530000	28217000	27671000
P51150	Rab7a	332181	426810	392080	6024900	5667200	5721500
P09055	Itgb1	351577	329382	359615	14626000	15586000	14145000
Q62419	Sh3gl1	355635	254124	254555	14959000	14884000	15613000
O08992	Sdcbp	361697	386548	355302	134010000	132720000	132020000
P21956	Mfge8	365251	498052	421341	7277800	7287200	7329900
P40240	Cd9	366111	246747	198973	9183100	9176600	8990500
P07356	Anxa2	377286	297965	254174	30886000	31043000	39645000
P62806	H4c1	383919	522552	484167	13786000	14963000	13948000
O70318	Epb41l2	384525	372191	347190	2442600	2653300	2981100
P10404	NA	401746	1014180	998293	9093300	9848800	11266000
P16858	Gapdh	403982	303327	307878	521050000	546440000	525560000
P10107	Anxa1	407188	280904	314142	38081000	34793000	35852000
Q9R045;Q8R0Z6	Angptl2	408855	392971	396681	6430300	6246200	6422100
E9Q414	Apob	430977	480243	475957	815540	780630	806270
O55222	Ilk	456258	382596	383389	627380	920090	659840
Q68FD5	Cltc	472412	492707	486139	100450000	97753000	99630000
P26040;P26043;P26041	Msn	488319	509882	472390	3888800	3641200	4317900
P50247	Ahcy	496471	426466	503600	12299000	14063000	12621000
P27601	Gna13	496744	422621	501884	348790	353800	291720
P52480	Pkm	500556	463621	473523	65630000	69190000	66754000
Q8BTM8	Flna	500650	556673	520388	3430600	5337800	3203000
Q8VDN2	Atp1a1	509999	583728	560178	27433000	24543000	33636000
P06151	Ldha	516523	583583	578794	4521500	3834000	3635000
Q9D1G1;P62821	Rab1A	522065	388087	350414	3154600	3529400	3094400
Q8VDD5	Myh9	545019	615868	654961	18903000	18331000	18227000
P26039	Tln1	554909	609981	586138	10604000	10341000	9456500
P53986	Slc16a1	568761	546359	514601	2768600	2701500	2826200
P60764;Q05144;P63001	Rac1	570649	810862	675808	2434000	3065900	3324200
P11499;P07901	Hsp90ab1	603974	785953	768936	65303000	67088000	61179000
P17742	Ppia	604690	689617	632298	23656000	23561000	22534000
P62874;P62880	Gnb2	604761	825439	834811	9563500	9340800	9634100
F8VPU2	Farp1	624550	542364	541782	5320900	5414200	5718900
Q8VCM7	Fgg	646623	653070	650280	2469600	2602700	2396100
P63101	Ywhaz	673182	634663	678234	12341000	11754000	11579000
P63260;P60710	Actg1	679264	530626	564966	217730000	210330000	203760000
Q99JR5	Tinagl1	730389	527587	672430	863300	912240	850330
P63017	Hspa8	749585	888525	866172	197140000	202570000	195910000
P10126	Eef1a1	772916	783476	817612	92945000	88806000	92601000
P18572	Bsg	817061	805217	758629	4689000	4606000	4552300
P17809	Slc2a1	863120	673676	644716	8365000	8556700	8095500
Q9WU78	Pdcd6ip	885623	1024140	954427	133420000	118830000	121520000
P68373;P05214;P68369;Q9JJZ2	Tuba1c	930920	908110	877981	3752900	3671900	3548900
Q02788	Col6a2	956161	928553	969079	1851300	1918000	1869000
P68372;Q9D6F9;P99024	Tubb5	1172760	1100900	1154560	77330000	76242000	78836000
Q04857	Col6a1	1221420	1108130	1135050	929420	962070	937100
P08752	Gnai2	1352550	1312160	1223620	15052000	13153000	14190000
Q05793	Hspg2	1402460	1794860	1691800	108020000	108320000	108200000
P62835;Q99JI6	Rap1b	1508910	1551190	1861150	5146700	5308700	5059000
P10852	Slc3a2	1578000	1509770	1671820	6498100	7019000	6905500
P62983	Rps27a	1715670	1842530	1541190	13701000	16617000	17822000
P11276	Fn1	3409370	4169140	4167940	16067000	15908000	16213000
P68373;P68369;Q3UX10;P68368;P05213	Tuba4a	4152940	4115990	4701420	13377000	14870000	13089000

## Sheet: human and mouse common
Protein ID	Genes	B16 exo-1	B16 exo-2	B16 exo-3	MC38 exo-1	MC38 exo-2	MC38 exo-3	EA549-1	EA549-2	Esw480-1	Esw480-2	Ehela-1	Ehela-2	EBEAS-1	EBEAS-2	EMCF-1	EMCF-2
Q99P91	Gpnmb	3203300	3123700	3089000	6677.24	39324.3	17705.2	4400.85	3531.63	9549.64	1080.82	10243.6	8603.29
Q9R1Q6	Tmem176b	1113600	1125000	1087400	68328.5	81427.3	81516.7	48232.3	43346.3	1057.63	663.966	696650	881154
B2RXV4	Flvcr1	409740	434250	378800	21841.4	21344.8	15626.8	4505.78	4158.2	4954.46	5631.42	12650.1	12555.1
Q9CR51	Atp6v1g1	219200	811250	809110	8797.29	6223.87	6931.96	1804.02	1136.14	6391.47	4583.67	3854.43	2846.37

## Sheet: B16 exo vs cell>2
Protein IDs	Entry	Gene	Peptide counts (unique)	Sequence coverage [%]	Score	LFQ intensity GXJ-B16-exo-1	LFQ intensity GXJ-B16-exo-2	LFQ intensity GXJ-B16-exo-3	LFQ intensity GXJ-B16-pro-1	LFQ intensity GXJ-B16-pro-2	LFQ intensity GXJ-B16-pro-3	exo_average	cell_average	exo/cell
Q91WG8	Q91WG8	Gne	14;14;11;11;6;2;1;1;1	25.9	39.709	653580	767150	786670	346620	328010	423020	735800	365883	2.01102
A0A0H2UH25	A0A0H2UH25	Vangl1	4;4;4;2;1	13.2	7.3495	0	105870	216720	55900	55435	48557	107530	53297.3	2.01755
O08848	O08848	RO60	13	42.8	45.525	776260	863720	1053300	460160	459130	407470	897760	442253	2.02997
P61021	P61021	Rab5b	4	36.7	43.895	581910	505200	558180	277920	270610	261090	548430	269873	2.03218
Q99JB8	Q99JB8	Pacsin3	10;3	32.8	37.039	681510	687790	738350	346870	348570	329240	702550	341560	2.05689
P10107	P10107	Anxa1	34;27	70.2	323.31	38081000	34793000	35852000	17837000	18264000	16341000	36242000	1.74807e+07	2.07326
Q9D2V7	Q9D2V7	Coro7	31;7;7	56	146.71	4485000	4282800	3927400	2135300	2065900	1915500	4.23173e+06	2038900	2.0755
Q61469	Q61469	Plpp1	1	5.7	3.6452	122710	0	120930	38036	42092	36801	81213.3	38976.3	2.08366
P62874	P62874	Gnb1	10;7;4;0	63.2	323.31	14674000	13773000	14092000	6773400	6680900	6823200	1.41797e+07	6.75917e+06	2.09784
P16627	P16627	Hspa1l	4	24	6.0783	1156600	916610	896270	710560	688920	0	989827	466493	2.12185
P54116	P54116	Stom	7	34.9	40.218	1124200	990130	926290	496620	467280	448400	1013540	470767	2.15296
Q9WV60	Q9WV60	Gsk3b	9;9	38.3	39.176	1812100	1767800	1754400	812020	831460	815040	1778100	819507	2.16972
Q9QZF2	Q9QZF2	Gpc1	13	40	34.468	919190	1190500	1216000	658800	425950	439800	1.10856e+06	508183	2.18142
P10833	P10833	Rras	3	29.4	12.194	496460	0	420160	132560	164280	114810	305540	137217	2.2267
O35375	O35375	Nrp2	15	25.2	74.571	1673600	1500400	1783500	771950	708030	695180	1652500	725053	2.27914
Q8R1Q8	Q8R1Q8	Dync1li1	24	52.2	89.439	3106200	3061500	3191700	1366600	1316000	1407700	3119800	1.36343e+06	2.28819
Q9ERN0	Q9ERN0	Scamp2	2;1	9.7	7.5626	512950	490250	462760	201870	204880	212610	488653	206453	2.36689
F8VQ29	F8VQ29	Iqgap3	12;8;4	11.3	33.989	450670	486540	481630	191860	205600	195930	472947	197797	2.39108
P28474	P28474	Adh5	12;2	45.5	174.12	2715800	2673000	2623900	1151200	1073000	1091700	2670900	1105300	2.41645
A0A0U1RPX4	A0A0U1RPX4	Mapk3	7;7;6;2;1	39.4	21.903	1482900	1315100	1592000	626610	566300	612600	1.46333e+06	601837	2.43145
Q62159	Q62159	Rhoc	6;2	46.6	20.326	2071900	2627700	1920100	925340	951910	844030	2.20657e+06	907093	2.43257
P12382	P12382	Pfkl	26;3;1	46.9	323.31	12019000	11314000	11553000	4669200	4787100	4859900	1.16287e+07	4.77207e+06	2.43682
Q07797	Q07797	Lgals3bp	8;6;1	18.7	140.2	3917000	1185100	1602800	968940	780540	940600	2.23497e+06	896693	2.49245
P63321	P63321	Rala	3;1	20.4	6.0615	521270	454870	479060	150960	141100	289940	485067	194000	2.50034
A0A494B9F0	A0A494B9F0	Nedd4l	12;12;12;11;11;11;10;10;9;6;4;1	20.6	44.296	1213900	1068200	1008200	544230	208560	554770	1.09677e+06	435853	2.51637
Q91XW8	Q91XW8	Fkbp6	10	29.1	25.916	1258700	1277400	1171600	494920	474940	485310	1235900	485057	2.54795
P61027	P61027	Rab10	5	29	115.02	1819400	1695200	1808600	697030	668850	704400	1774400	690093	2.57125
P50247	P50247	Ahcy	22;2	59.3	323.31	12299000	14063000	12621000	4741800	4939200	5472700	1.29943e+07	5.05123e+06	2.57251
P16858	P16858	Gapdh	0;0;0;0;0;0;0;0;0	85.6	323.31	521050000	546440000	525560000	197290000	211160000	206060000	5.31017e+08	2.04837e+08	2.59239
A0A1B0GR63	A0A1B0GR63	Chmp2a	6;6;5;1	20.9	57.917	1198400	861160	1165700	0	598720	644230	1.07509e+06	414317	2.59484
Q9WVK4	Q9WVK4	Ehd1	23;1	52.4	170.38	6981000	6222400	7181900	2431400	2629600	2790100	6795100	2.61703e+06	2.59649
P61226	P61226	Rap2b	5	66.7	107.73	2559300	2535200	2459000	845660	1029000	1005400	2.51783e+06	960020	2.62269
Q8K094	Q8K094	Pvr	5	19.6	36.418	1014300	1009700	923840	379570	375350	366640	982613	373853	2.62834
P30412	P30412	Ppic	10	57.5	80.171	2394700	2602400	2526400	955290	929450	967580	2.50783e+06	950773	2.63768
Q8C5G6	Q8C5G6	Tollip	6;6;4;3	43.6	28.951	757900	766940	826920	276390	266170	348430	783920	296997	2.63949
Q8K2Q7	Q8K2Q7	Brox	12;2;1;1	35	56.066	1116500	1484700	1441800	430470	544960	553670	1.34767e+06	509700	2.64404
P08752	P08752	Gnai2	18;12;3;0;0;0;0;0;0;0;0	67.3	323.31	15052000	13153000	14190000	5431900	5195200	5324700	1.41317e+07	5.31727e+06	2.65769
P62880	P62880	Gnb2	7;6;4;3;3;4	50.6	217.35	9563500	9340800	9634100	3532500	3548100	3643000	9512800	3.57453e+06	2.66127
Q9EQP2	Q9EQP2	Ehd4	16	40.7	59.067	1668700	1599900	2120900	651420	802200	545840	1796500	666487	2.69548
Q9CWF2	Q9CWF2	Tubb2b	1	71.9	27.141	1655900	1507500	1634800	648830	606730	521260	1599400	592273	2.70044
P68372	P68372	Tubb4b	2;0	81.8	323.31	171140000	181590000	162060000	62282000	62442000	65148000	1.71597e+08	6.32907e+07	2.71125
P62983	P62983	Rps27a	14;9;9;9;9;9;9;9;9;9	72.4	186.52	13701000	16617000	17822000	5499300	5817400	6071500	1.60467e+07	5.79607e+06	2.76854
Q04736	Q04736	Yes1	7;3	28.3	17.663	1353400	1249700	874410	386160	490780	375670	1159170	417537	2.77621
Q5SXR6	Q5SXR6	Cltc	104;104;10	59.9	323.31	100450000	97753000	99630000	35701000	36049000	35027000	9.92777e+07	3.55923e+07	2.7893
Q64430	Q64430	Atp7a	18;18;1;1	21.1	86.311	1111000	1104900	1143600	382080	411310	408480	1.11983e+06	400623	2.79523
P17156	P17156	Hspa2	6	31.1	12.361	327150	420850	248060	159530	0	172280	332020	110603	3.0019
Q9JLQ0	Q9JLQ0	Cd2ap	19;16	40	91.36	3457100	3217500	3155900	1094700	1104100	959390	3.27683e+06	1052730	3.1127
P10630	P10630	Eif4a2	7;4;6;4;1;1	49.1	12.396	453680	522140	496580	131240	239810	99758	490800	156936	3.12739
Q6P9J9	Q6P9J9	Ano6	8;8;5;3	12.4	60.969	830610	855670	858550	256390	276170	274550	848277	269037	3.15302
Q8VD75	Q8VD75	Hip1	25;19;3;2;1;0	38.2	122.02	1723600	1810100	1857100	585920	621730	499770	1.79693e+06	569140	3.15728
P21278	P21278	Gna11	8	35.1	24.231	1506800	1529200	1039300	413890	366270	504560	1.35843e+06	428240	3.17213
P55258	P55258	Rab8a	3	18.4	28.01	1777200	1675600	1779200	516940	538560	552460	1744000	535987	3.25381
P97370	P97370	Atp1b3	9	44.6	109.06	2714700	3157200	3014300	837910	862860	1020300	2.96207e+06	907023	3.2657
Q9QXY6	Q9QXY6	Ehd3	13	36.3	37.664	957500	851560	968140	232770	222720	388340	925733	281277	3.29118
P62835	P62835	Rap1a	4;4;1;1	67.4	20.771	655310	677510	627320	190760	197190	202760	653380	196903	3.31828
P63094	P63094	Gnas	14;13;13;2;2;2	47	133.14	6675000	5857500	5863800	1958500	1777200	1808100	6132100	1.84793e+06	3.31836
P63037	P63037	Dnaja1	24;18;15;11	68.8	236.63	6676600	6624900	6565400	1952800	1986800	2039100	6622300	1992900	3.32295
P10852	P10852	Slc3a2	16;11;5;5;5;4;1	37.3	244.2	6498100	7019000	6905500	2049900	2051000	2022500	6.80753e+06	2.04113e+06	3.33517
P08207	P08207	S100a10	6	61.9	23.478	1247400	1031600	1005900	342500	335250	297930	1.09497e+06	325227	3.36678
Q9JIW9	Q9JIW9	Ralb	3;3	19.9	7.8607	1394500	1380700	1429900	410370	394870	430830	1401700	412023	3.40199
A0A0G2JFV3	A0A0G2JFV3	Adgrl2	20;20;20;18;18;18;18;18;11;11;7;6;1	23.3	47.541	2080900	1806200	2060700	570890	541020	584770	1982600	565560	3.50555
O54890	O54890	Itgb3	6	9.3	21.955	595940	233730	0	117570	0	118910	276557	78826.7	3.50842
E9QNH6	E9QNH6	Myo1b	15;15;15;15;8;1	20.8	49.399	1230700	1317500	1130200	342540	339730	352580	1.22613e+06	344950	3.55452
P08030	P08030	Aprt	10;2	72.2	25.933	1866800	1306500	1831900	463080	464910	477830	1668400	468607	3.56034
A0A2C9F2D2	A0A2C9F2D2	Anxa7	11;11;2	23.1	80.255	2493500	2329600	2400700	757630	555800	712090	2.40793e+06	675173	3.56639
Q9DC51	Q9DC51	Gnai3	14	50.3	168.9	4422200	4429600	4297800	1084400	1269200	1305500	4383200	1219700	3.59367
Q62351	Q62351	Tfrc	18;14	29	147.79	2998100	3206400	3000600	872760	879040	802970	3.06837e+06	851590	3.6031
Q9WTI7	Q9WTI7	Myo1c	24	30.1	87.986	5121300	5569400	5838900	1512400	1472000	1457200	5.50987e+06	1.48053e+06	3.72154
D6RFN5	D6RFN5	Ninj1	1;1;1	18.2	12.251	85315	76391	0	15476	14897	12983	53902	14452	3.72973
Q99JI6	Q99JI6	Rap1b	6;1	67.4	160.16	5146700	5308700	5059000	1322200	1331500	1461300	5.17147e+06	1.37167e+06	3.77021
Q9CQ80	Q9CQ80	Vps25	7;6;5;3;3	56.2	56.852	1159500	1079200	1027400	328890	280650	242320	1088700	283953	3.83408
Q09143	Q09143	Slc7a1	8;7;2	15.1	224.28	4638300	4999500	3181800	953230	941810	1443600	4273200	1112880	3.83977
Q5DTK1	Q5DTK1	Chsy3	8;1	15.6	17.288	414740	364610	167180	83256	70969	83664	315510	79296.3	3.97887
P09055	P09055	Itgb1	33	42.5	300.93	14626000	15586000	14145000	3588900	3758800	3762900	1.47857e+07	3.70353e+06	3.99231
P70206	P70206	Plxna1	19;1	16.9	41.601	948140	960760	892460	236840	229390	228450	933787	231560	4.03259
Q8BRB1	Q8BRB1	Epha3	29;28;25;17;7;2;2;0	48.3	323.31	8777400	8842300	9299300	2076500	2168500	2185600	8973000	2.14353e+06	4.18608
B7ZMZ7	B7ZMZ7	Dip2c	9;8;8;3;2;2;1;1	9.4	21.569	584080	377300	511420	104420	129970	116990	490933	117127	4.19147
P53986	P53986	Slc16a1	9	16.4	82.188	2768600	2701500	2826200	608410	635670	673790	2.76543e+06	639290	4.32579
O35598	O35598	Adam10	8;6;3	18.4	19.056	1220600	1014700	1012500	317210	207780	217010	1082600	247333	4.37709
Q9CR26	Q9CR26	Vta1	5;2;1	23	174.96	3443300	2846200	2476300	661550	698820	634500	2.92193e+06	664957	4.39417
F8VQB6	F8VQB6	Myo10	12;6;6;1;1	10.1	46.231	671160	619930	632330	146590	138710	135650	641140	140317	4.56924
B1AWE0	B1AWE0	Clta	16;16;14;14;14;14	37	249.72	17493000	12984000	16404000	3422000	3280000	3453400	15627000	3.38513e+06	4.61636
F8VQJ3	F8VQJ3	Lamc1	16;14;2;1	15.7	24.036	1504800	1091500	970880	209400	314050	248220	1189060	257223	4.62268
Q6PHN9	Q6PHN9	Rab35	6	32.8	11.708	667140	723170	650450	143140	154550	139990	680253	145893	4.66268
Q9QYJ0	Q9QYJ0	Dnaja2	21	51.7	230.99	10636000	10770000	10714000	2227500	2212400	2253900	1.07067e+07	2.23127e+06	4.79847
Q9WVM1	Q9WVM1	Racgap1	10;3;1;1	23.7	50.524	1618300	1577700	1761200	345880	352460	300470	1652400	332937	4.96311
Q3UH60	Q3UH60	Dip2b	13	30.2	229.22	9346600	8941500	9691200	1721500	1997500	1875500	9.32643e+06	1.86483e+06	5.00122
P97384	P97384	Anxa11	16;12	33	149.32	7786000	8067800	7870000	1551000	1576100	1580000	7.90793e+06	1.56903e+06	5.04
P84096	P84096	Rhog	7;3	46.6	68.236	2717600	3058800	2987400	490510	557340	608150	2.92127e+06	552000	5.29215
Q62419	Q62419	Sh3gl1	16;14;2;2;2;1;1	49.2	189.5	14959000	14884000	15613000	2862600	2840500	2843100	15152000	2.84873e+06	5.31886
Q3U1V6	Q3U1V6	Uevld	4	16.8	11.761	0	479190	463370	59554	56869	59912	314187	58778.3	5.34528
P70452	P70452	Stx4	6	35.9	12.937	656350	703520	629360	112130	117990	127110	663077	119077	5.56849
P27601	P27601	Gna13	8;3	27.6	10.56	348790	353800	291720	0	0	175680	331437	58560	5.65978
P40749	P40749	Syt4	7	26.6	13.71	586650	392960	270660	116260	0	98817	416757	71692.3	5.81313
D3Z3E8	D3Z3E8	Mov10	21;21;21;21	26.6	199.43	5689200	5486800	5633000	757070	949390	1098400	5603000	934953	5.99281
Q61072	Q61072	Adam9	10;10;9;1	20	20.789	710410	717840	769880	117940	122520	113850	732710	118103	6.20397
E9Q5G3	E9Q5G3	Kif23	20;13	30.8	48.612	1358200	1159200	1478100	191890	250360	197350	1.33183e+06	213200	6.24687
Q2TA50	Q2TA50	Mlana	8;1	48.7	64.142	11478000	10310000	10353000	1666100	1687300	1533300	1.07137e+07	1628900	6.57724
Q9D1C8	Q9D1C8	Vps28	10;7	59.3	116.6	5056100	5050300	4886800	753360	773250	711800	4.99773e+06	746137	6.69815
P46467	P46467	Vps4b	11	44.4	129.27	4097400	4033100	4046000	531830	546110	580690	4.05883e+06	552877	7.3413
P12815	P12815	Pdcd6	6	40.8	89.861	3300600	2712200	3172500	417850	399440	423220	3.06177e+06	413503	7.40445
Q9ESU7	Q9ESU7	Slc1a5	11;7	20.5	37.191	2159500	2089100	2259500	295190	252570	330550	2.16937e+06	292770	7.4098
A2AUM6	A2AUM6	Srp14	3;3	27.8	42.129	1453800	1470300	1420100	583140	0	0	1.44807e+06	194380	7.44967
Q61739	Q61739	Itga6	6	33.6	177.96	7257500	7919900	8791300	1117300	1104800	911010	7.98957e+06	1044370	7.65013
Q9CX00	Q9CX00	Ist1	9	37	117.4	2354100	2246200	2309800	304480	293850	291960	2.30337e+06	296763	7.76163
P17809	P17809	Slc2a1	6;1;1;1;1	12.2	159.3	8365000	8556700	8095500	1078000	1014700	1111000	8.33907e+06	1067900	7.80885
Q8K2J7	Q8K2J7	Rell1	2	22.1	11.771	0	252380	225660	56210	0	0	159347	18736.7	8.50454
Q9D8B3	Q9D8B3	Chmp4b	12	40.2	141.5	4897500	4998400	5170200	406690	647770	527430	5.02203e+06	527297	9.52411
F8VPU2	F8VPU2	Farp1	18;7	23.7	91.881	5320900	5414200	5718900	452960	297020	830720	5.48467e+06	526900	10.4093
P10404	P10404	NA	9;0	20.3	165.06	9093300	9848800	11266000	1084700	943250	868140	1.00694e+07	965363	10.4306
P11370	P11370	Fv4	5	10	279.26	52972000	50272000	49695000	4593600	4652400	4626000	5.09797e+07	4624000	11.025
A2AMH3	A2AMH3	Slc44a1	4;4;4;4	11	7.9694	232060	257760	249080	0	65856	0	246300	21952	11.2199
Q61187	Q61187	Tsg101	8;6;2;2;1;1	26.1	27.71	4092700	4924400	7200800	297710	524300	491510	5.40597e+06	437840	12.3469
Q78HU3	Q78HU3	Mvb12a	9	42.1	48.561	3021200	2831400	2846900	220540	238740	200730	2.89983e+06	220003	13.1809
Q8BT07	Q8BT07	Cep55	11	34.2	28.847	2100000	1827300	898710	0	109810	247870	1608670	119227	13.4925
E9Q3X0	E9Q3X0	Mvp	31;30;6	47	78.955	4302400	3534500	3803000	270490	232270	311540	3.87997e+06	271433	14.2944
A0A0A6YX40	A0A0A6YX40	Igsf3	32;31	33.5	107.66	7203700	6841200	6668500	381560	401340	611790	6.90447e+06	464897	14.8516
P68368	P68368	Tuba4a	5;5;3;0;0;0	67	113.38	13377000	14870000	13089000	615550	966000	450250	1.37787e+07	677267	20.3445
Q810U5	Q810U5	Ccdc50	19;18	58	163.51	5358500	5339400	5105600	261260	242230	266150	5.26783e+06	256547	20.5336
P35762	P35762	Cd81	4;3	28.8	323.31	40406000	39829000	39052000	1776700	2140400	1890600	3.97623e+07	1935900	20.5395
P97333	P97333	Nrp1	6	10.5	10.976	1303800	691820	1307700	150270	0	0	1.10111e+06	50090	21.9826
A0A0R4J0I9	A0A0R4J0I9	Lrp1	38;38;7;1	13.6	99.277	4542300	4447400	4716800	252030	183590	183750	4.56883e+06	206457	22.1297
Q9WU78	Q9WU78	Pdcd6ip	75	70.8	323.31	133420000	118830000	121520000	4758400	5678600	5458500	124590000	5298500	23.5142
Q8VEJ9	Q8VEJ9	Vps4a	4	20.8	27.409	465450	477050	424640	0	0	57672	455713	19224	23.7054
Q9CYL5	Q9CYL5	Glipr2	2	19.5	21.475	550870	564380	581040	0	35259	34570	565430	23276.3	24.2921
Q8R0J7	Q8R0J7	Vps37b	10	38.6	95.546	3978000	4330100	4137500	182820	285010	0	4.14853e+06	155943	26.6028
P32037	P32037	Slc2a3	4	12.4	8.885	532710	511520	0	0	0	37779	348077	12593	27.6405
Q8K274	Q8K274	Fn3krp	2	13.3	7.9219	356410	0	361360	22986	0	0	239257	7662	31.2264
Q61292	Q61292	Lamb2	18;2;1	14.8	70.473	2802900	2597400	2087100	65662	64691	65748	2495800	65367	38.1813
Q4VAA7	Q4VAA7	Snx33	9	15.7	26.051	816800	876880	751220	0	0	51953	814967	17317.7	47.0598
Q3TH73	Q3TH73	Ttyh2	8	17.3	32.876	1790100	2025900	2007600	58104	59014	0	1941200	39039.3	49.7242
Q9R1Q6	Q9R1Q6	Tmem176b	4	9.9	22.575	1113600	1125000	1092000	26218	31962	0	1110200	19393.3	57.2465
Q60634	Q60634	Flot2	21;20	56.3	40.604	3013800	3047300	2903200	148240	0	0	2988100	49413.3	60.4715
A0A0A6YWR8	A0A0A6YWR8	Map4k4	1;1;1	16.1	63.166	1599300	1535700	1474600	42232	0	33561	1.53653e+06	25264.3	60.8183
P08226	P08226	Apoe	21;13;13;9	53.7	209.86	25147000	25134000	24626000	382590	382890	435400	24969000	400293	62.3768
P97857	P97857	Adamts1	14;10	25.3	61.511	3229400	2073900	2881100	35067	33816	31568	2.72813e+06	33483.7	81.4765
O08992	O08992	Sdcbp	1;1;1;1	78.3	323.31	134010000	132720000	132020000	1604400	1568400	1368800	1.32917e+08	1.51387e+06	87.7995
P40240	P40240	Cd9	3	21.2	87.032	9183100	9176600	8990500	0	287640	0	9.11673e+06	95880	95.0848
Q792F9	Q792F9	Itga4	20;19	26.3	158.19	11505000	11708000	11544000	110160	117270	129290	1.15857e+07	118907	97.435
A0A0R4J0A9	A0A0R4J0A9	Lrp6	12;12	11.1	36.393	629040	2004200	1605300	42874	0	0	1.41285e+06	14291.3	98.8604
Q6P5F7	Q6P5F7	Ttyh3	7	17.2	76.263	2240600	2199600	2421100	0	0	34101	2287100	11367	201.205
G3UYZ1	G3UYZ1	Igsf8	3;2	63	323.31	177610000	175130000	177820000	815550	895300	830780	1.76853e+08	847210	208.748
E9PZ16	E9PZ16	Hspg2	134;133;105	48.4	323.31	108020000	108320000	108200000	554300	461790	461950	108180000	492680	219.575
Q61696	Q61696	Hspa1a	7;7	28.9	28.289	3609800	3469600	3848000	47291	0	0	3.64247e+06	15763.7	231.067
Q8K1B8	Q8K1B8	Fermt3	4;2;1;1	7.2	9.0389	151390	106870	0	0	0	0	86086.7	0	#DIV/0!
D3Z4N4	D3Z4N4	Igf2	2;2	18.4	4.2226	108830	109610	0	0	0	0	72813.3	0	#DIV/0!
A2A5Z6	A2A5Z6	Smurf2	3;1;1;1;1;1	5.6	4.2158	121890	134820	0	0	0	0	85570	0	#DIV/0!
Q99KN1	Q99KN1	Arrdc1	2;1;1;1	10.8	7.8512	198390	190310	0	0	0	0	129567	0	#DIV/0!
P82198	P82198	Tgfbi	2;1	4.2	3.615	202080	199120	0	0	0	0	133733	0	#DIV/0!
P21460	P21460	Cst3	3;2	39.3	7.3632	249440	267630	0	0	0	0	172357	0	#DIV/0!
Q640N1	Q640N1	Aebp1	6	9.1	8.1776	435960	270630	0	0	0	0	235530	0	#DIV/0!
Q8BSB7	Q8BSB7	Tfpi	2;2;2;2;2	13.6	20.505	342890	350770	0	0	0	0	231220	0	#DIV/0!
O09173	O09173	Hgd	2;1	6.1	4.278	417770	408010	0	0	0	0	275260	0	#DIV/0!
P32261	P32261	Serpinc1	2;1;1;1	6.9	1.5475	536740	557550	0	0	0	0	364763	0	#DIV/0!
Q9CZ52	Q9CZ52	Antxr1	3;3;2	7.7	3.2896	90619	0	99052	0	0	0	63223.7	0	#DIV/0!
P11152	P11152	Lpl	3	7.6	6.3072	157590	166040	101240	0	0	0	141623	0	#DIV/0!
A0A0G2JDU7	A0A0G2JDU7	Fscn1	2;2	10.8	3.0073	160600	154460	146170	0	0	0	153743	0	#DIV/0!
Q9JIM1	Q9JIM1	Slc29a1	2;2;1	7	5.4148	140210	131930	152540	0	0	0	141560	0	#DIV/0!
Q9DBH0	Q9DBH0	Wwp2	2;2;1	3	2.631	0	192850	159390	0	0	0	117413	0	#DIV/0!
E9Q0X2	E9Q0X2	Apold1	2	14.2	3.4677	169280	0	166830	0	0	0	112037	0	#DIV/0!
P98063	P98063	Bmp1	4;1;1	5.9	7.0548	0	161500	168270	0	0	0	109923	0	#DIV/0!
Q8BGG7	Q8BGG7	Ubash3b	2;1	7.4	3.882	150250	0	182870	0	0	0	111040	0	#DIV/0!
Q9QXP6	Q9QXP6	Mkrn1	5;3;3;3;3;1;1	20.2	11.932	0	185210	183600	0	0	0	122937	0	#DIV/0!
Q8C669	Q8C669	Peli1	2	10.5	4.8411	210690	213240	190580	0	0	0	204837	0	#DIV/0!
A0A0R4J1G9	A0A0R4J1G9	Steap3	7;7;7;6	16.6	9.8976	214200	192300	205300	0	0	0	203933	0	#DIV/0!
O89051	O89051	Itm2b	3;1;1	18	4.7217	182190	200290	209450	0	0	0	197310	0	#DIV/0!
A0A286YCQ5	A0A286YCQ5	Nid2	2;2	2.7	7.6141	213890	190480	214510	0	0	0	206293	0	#DIV/0!
Q01149	Q01149	Col1a2	2	2.6	5.9993	195370	216470	225190	0	0	0	212343	0	#DIV/0!
Q91Y97	Q91Y97	Aldob	2	8.5	3.0577	233640	0	233360	0	0	0	155667	0	#DIV/0!
Q8K1A6	Q8K1A6	Cc2d1a	4;2	7.4	5.905	205850	199460	236570	0	0	0	213960	0	#DIV/0!
[truncated: 62 more rows]
