# Supplementary material for: Cancer cells impede T cell early activation and drive immune evasion by transferring Tmem176b
Source: Research Square preprint supplement (doi:10.21203/rs.3.rs-6199894/v1), 2025-07-07
Supplement: Supplementary file 3 [file Supplementary Table_2_B16-Flag(Tmem176b) IP-MS.xlsx]

## Sheet: merge
gene name	Description	V1	V2	T1	T2
Tubb2b	Tubulin beta-2B chain OS=Mus musculus OX=10090 GN=Tubb2b PE=1 SV=1	NA	NA	283	279
Ubb	Polyubiquitin-B (Fragment) OS=Mus musculus OX=10090 GN=Ubb PE=4 SV=2	NA	NA	274	250
Ubc	Polyubiquitin-C (Fragment) OS=Mus musculus OX=10090 GN=Ubc PE=1 SV=1	NA	NA	274	250
Plxna1	Plexin-A1 OS=Mus musculus OX=10090 GN=Plxna1 PE=1 SV=1	NA	NA	240	220
Epha3	Receptor protein-tyrosine kinase OS=Mus musculus OX=10090 GN=Epha3 PE=1 SV=1	NA	NA	229	221
Hspa1b	Heat shock 70 kDa protein 1B OS=Mus musculus OX=10090 GN=Hspa1b PE=1 SV=3	NA	NA	225	215
Tuba4a	Tubulin alpha-4A chain OS=Mus musculus OX=10090 GN=Tuba4a PE=1 SV=1	NA	NA	223	197
Fat1	FAT atypical cadherin 1 OS=Mus musculus OX=10090 GN=Fat1 PE=1 SV=1	NA	NA	198	163
Flna	Filamin alpha OS=Mus musculus OX=10090 GN=Flna PE=1 SV=1	NA	NA	173	149
Unc5c	Netrin receptor UNC5C OS=Mus musculus OX=10090 GN=Unc5c PE=1 SV=1	NA	NA	156	154
Plxnd1	Plexin-D1 OS=Mus musculus OX=10090 GN=Plxnd1 PE=1 SV=1	NA	NA	153	147
Bmpr2	Bone morphogenetic protein receptor type-2 OS=Mus musculus OX=10090 GN=Bmpr2 PE=1 SV=1	NA	NA	153	145
Itch	E3 ubiquitin-protein ligase Itchy OS=Mus musculus OX=10090 GN=Itch PE=1 SV=2	NA	NA	141	137
Nrp2	Neuropilin-2 OS=Mus musculus OX=10090 GN=Nrp2 PE=1 SV=2	NA	NA	131	119
Notch2	Neurogenic locus notch homolog protein 2 OS=Mus musculus OX=10090 GN=Notch2 PE=1 SV=2	NA	NA	107	103
Nedd4l	HECT-type E3 ubiquitin transferase OS=Mus musculus OX=10090 GN=Nedd4l PE=1 SV=1	NA	NA	101	99
Hgs	Hepatocyte growth factor-regulated tyrosine kinase substrate OS=Mus musculus OX=10090 GN=Hgs PE=1 SV=2	NA	NA	102	94
Ssrp1	FACT complex subunit SSRP1 (Fragment) OS=Mus musculus OX=10090 GN=Ssrp1 PE=1 SV=1	NA	NA	108	85
Ptpra	Receptor-type tyrosine-protein phosphatase alpha OS=Mus musculus OX=10090 GN=Ptpra PE=1 SV=1	NA	NA	98	95
Ddr1	Epithelial discoidin domain-containing receptor 1 OS=Mus musculus OX=10090 GN=Ddr1 PE=2 SV=2	NA	NA	89	95
Atp7a	Copper-transporting ATPase 1 OS=Mus musculus OX=10090 GN=Atp7a PE=1 SV=3	NA	NA	90	86
Stub1	STIP1 homology and U box-containing protein 1 OS=Mus musculus OX=10090 GN=Stub1 PE=1 SV=1	NA	NA	85	86
Daam2	Disheveled-associated activator of morphogenesis 2 OS=Mus musculus OX=10090 GN=Daam2 PE=1 SV=4	NA	NA	90	80
Vamp7	Vesicle-associated membrane protein 7 OS=Mus musculus OX=10090 GN=Vamp7 PE=1 SV=1	NA	NA	79	85
Adgrl2	Adhesion G protein-coupled receptor L2 OS=Mus musculus OX=10090 GN=Adgrl2 PE=1 SV=1	NA	NA	80	82
Stam2	Signal transducing adapter molecule 2 OS=Mus musculus OX=10090 GN=Stam2 PE=1 SV=1	NA	NA	73	86
Wwp1	NEDD4-like E3 ubiquitin-protein ligase WWP1 OS=Mus musculus OX=10090 GN=Wwp1 PE=1 SV=2	NA	NA	82	76
Usp8	Ubiquitin carboxyl-terminal hydrolase 8 OS=Mus musculus OX=10090 GN=Usp8 PE=1 SV=2	NA	NA	79	79
Bcap31	B-cell receptor-associated protein 31 OS=Mus musculus OX=10090 GN=Bcap31 PE=1 SV=4	NA	NA	72	73
Il6st	Interleukin-6 receptor subunit beta OS=Mus musculus OX=10090 GN=Il6st PE=1 SV=2	NA	NA	70	68
Marchf7	E3 ubiquitin-protein ligase MARCHF7 OS=Mus musculus OX=10090 GN=Marchf7 PE=2 SV=1	NA	NA	59	74
Rnf130	E3 ubiquitin-protein ligase RNF130 OS=Mus musculus OX=10090 GN=Rnf130 PE=1 SV=1	NA	NA	66	66
Rnf149	E3 ubiquitin-protein ligase RNF149 OS=Mus musculus OX=10090 GN=Rnf149 PE=1 SV=3	NA	NA	70	61
Igkv1-117	Immunoglobulin kappa variable 1-117 (Fragment) OS=Mus musculus OX=10090 GN=Igkv1-117 PE=4 SV=2	NA	NA	43	86
Tmem59	Transmembrane protein 59 OS=Mus musculus OX=10090 GN=Tmem59 PE=1 SV=2	NA	NA	61	60
Erbb3	Receptor tyrosine-protein kinase erbB-3 OS=Mus musculus OX=10090 GN=Erbb3 PE=1 SV=2	NA	NA	62	55
Mmp14	Matrix metalloproteinase-14 OS=Mus musculus OX=10090 GN=Mmp14 PE=2 SV=3	NA	NA	55	60
Scamp3	Secretory carrier-associated membrane protein OS=Mus musculus OX=10090 GN=Scamp3 PE=1 SV=1	NA	NA	51	63
Lrp12	Low-density lipoprotein receptor-related protein 12 OS=Mus musculus OX=10090 GN=Lrp12 PE=2 SV=2	NA	NA	60	53
Pi4k2b	Phosphatidylinositol 4-kinase type 2-beta OS=Mus musculus OX=10090 GN=Pi4k2b PE=1 SV=1	NA	NA	54	56
Tgfbr2	TGF-beta receptor type-2 OS=Mus musculus OX=10090 GN=Tgfbr2 PE=1 SV=1	NA	NA	54	56
Acvr2a	Activin receptor type-2A OS=Mus musculus OX=10090 GN=Acvr2a PE=1 SV=1	NA	NA	57	52
Ptprm	Receptor-type tyrosine-protein phosphatase mu OS=Mus musculus OX=10090 GN=Ptprm PE=1 SV=2	NA	NA	53	56
Ankrd28	Serine/threonine-protein phosphatase 6 regulatory ankyrin repeat subunit A OS=Mus musculus OX=10090 GN=Ankrd28 PE=1 SV=1	NA	NA	52	57
Slc4a2	Anion exchange protein OS=Mus musculus OX=10090 GN=Slc4a2 PE=1 SV=1	NA	NA	53	55
Tm9sf3	Transmembrane 9 superfamily member 3 OS=Mus musculus OX=10090 GN=Tm9sf3 PE=1 SV=1	NA	NA	56	52
Capn6	Calpain-6 OS=Mus musculus OX=10090 GN=Capn6 PE=1 SV=2	NA	NA	48	53
Laptm4a	Lysosomal-associated transmembrane protein 4A OS=Mus musculus OX=10090 GN=Laptm4a PE=1 SV=1	NA	NA	55	46
Pi4k2a	Phosphatidylinositol 4-kinase type 2-alpha OS=Mus musculus OX=10090 GN=Pi4k2a PE=1 SV=1	NA	NA	48	51
Stx12	Syntaxin-12 OS=Mus musculus OX=10090 GN=Stx12 PE=1 SV=1	NA	NA	51	48
Abca3	ATP-binding cassette sub-family A member 3 OS=Mus musculus OX=10090 GN=Abca3 PE=1 SV=3	NA	NA	53	45
Gnptab	N-acetylglucosamine-1-phosphotransferase subunits alpha/beta OS=Mus musculus OX=10090 GN=Gnptab PE=2 SV=2	NA	NA	54	42
Atp2c1	Calcium-transporting ATPase OS=Mus musculus OX=10090 GN=Atp2c1 PE=1 SV=1	NA	NA	53	41
Mgrn1	E3 ubiquitin-protein ligase MGRN1 OS=Mus musculus OX=10090 GN=Mgrn1 PE=1 SV=2	NA	NA	48	44
Acvrl1	Serine/threonine-protein kinase receptor R3 OS=Mus musculus OX=10090 GN=Acvrl1 PE=1 SV=2	NA	NA	45	46
Chp1	Calcineurin B homologous protein 1 OS=Mus musculus OX=10090 GN=Chp1 PE=1 SV=2	NA	NA	42	48
Gpd2	Glycerol-3-phosphate dehydrogenase mitochondrial OS=Mus musculus OX=10090 GN=Gpd2 PE=1 SV=2	NA	NA	41	49
Pip4p2	Type 2 phosphatidylinositol 4 5-bisphosphate 4-phosphatase OS=Mus musculus OX=10090 GN=Pip4p2 PE=1 SV=1	NA	NA	41	48
Cyp20a1	Cytochrome P450 20A1 OS=Mus musculus OX=10090 GN=Cyp20a1 PE=1 SV=1	NA	NA	46	42
Galnt1	Polypeptide N-acetylgalactosaminyltransferase 1 OS=Mus musculus OX=10090 GN=Galnt1 PE=1 SV=1	NA	NA	45	42
Ephb4	Ephrin type-B receptor 4 OS=Mus musculus OX=10090 GN=Ephb4 PE=1 SV=2	NA	NA	48	37
Slc4a7	Anion exchange protein OS=Mus musculus OX=10090 GN=Slc4a7 PE=1 SV=1	NA	NA	44	40
Cmip	C-Maf-inducing protein OS=Mus musculus OX=10090 GN=Cmip PE=1 SV=3	NA	NA	39	44
Kidins220	Kinase D-interacting substrate 220 OS=Mus musculus OX=10090 GN=Kidins220 PE=1 SV=1	NA	NA	43	40
Stx6	Syntaxin-6 OS=Mus musculus OX=10090 GN=Stx6 PE=1 SV=1	NA	NA	41	42
Stxbp2	Syntaxin-binding protein 2 OS=Mus musculus OX=10090 GN=Stxbp2 PE=1 SV=1	NA	NA	35	46
Abcb1b	ATP-dependent translocase ABCB1 OS=Mus musculus OX=10090 GN=Abcb1b PE=1 SV=1	NA	NA	43	37
Stam	Signal transducing adapter molecule 1 OS=Mus musculus OX=10090 GN=Stam PE=1 SV=1	NA	NA	36	42
Ubl3	Ubiquitin-like protein 3 OS=Mus musculus OX=10090 GN=Ubl3 PE=1 SV=1	NA	NA	36	41
Atp6v0d1	V-type proton ATPase subunit d 1 OS=Mus musculus OX=10090 GN=Atp6v0d1 PE=1 SV=2	NA	NA	42	35
Slc3a2	4F2 cell-surface antigen heavy chain OS=Mus musculus OX=10090 GN=Slc3a2 PE=1 SV=1	NA	NA	41	34
Acvr1	Activin receptor type-1 OS=Mus musculus OX=10090 GN=Acvr1 PE=2 SV=2	NA	NA	39	36
Tm9sf2	Transmembrane 9 superfamily member 2 OS=Mus musculus OX=10090 GN=Tm9sf2 PE=1 SV=1	NA	NA	35	40
Chsy3	Chondroitin sulfate synthase 3 OS=Mus musculus OX=10090 GN=Chsy3 PE=2 SV=3	NA	NA	37	37
Stxbp3	Syntaxin-binding protein 3 OS=Mus musculus OX=10090 GN=Stxbp3 PE=1 SV=1	NA	NA	36	38
Lrrc8a	Volume-regulated anion channel subunit LRRC8A OS=Mus musculus OX=10090 GN=Lrrc8a PE=1 SV=1	NA	NA	38	36
Brox	BRO1 domain-containing protein BROX OS=Mus musculus OX=10090 GN=Brox PE=1 SV=1	NA	NA	36	37
Ecpas	Proteasome adapter and scaffold protein ECM29 OS=Mus musculus OX=10090 GN=Ecpas PE=1 SV=3	NA	NA	36	37
Rell1	RELT-like protein 1 OS=Mus musculus OX=10090 GN=Rell1 PE=2 SV=2	NA	NA	40	33
Syt11	Synaptotagmin-11 OS=Mus musculus OX=10090 GN=Syt11 PE=1 SV=2	NA	NA	38	35
Plxna2	Plexin-A2 OS=Mus musculus OX=10090 GN=Plxna2 PE=1 SV=2	NA	NA	35	36
Bmpr1a	Bone morphogenetic protein receptor type-1A OS=Mus musculus OX=10090 GN=Bmpr1a PE=1 SV=1	NA	NA	34	36
Tnpo1	Transportin-1 OS=Mus musculus OX=10090 GN=Tnpo1 PE=1 SV=2	NA	NA	33	37
Apold1	Apolipoprotein L domain-containing 1 OS=Mus musculus OX=10090 GN=Apold1 PE=3 SV=1	NA	NA	36	33
Erbin	Erbb2ip protein OS=Mus musculus OX=10090 GN=Erbin PE=1 SV=1	NA	NA	39	30
	Phosphatidylglycerophosphatase and protein-tyrosine phosphatase 1 OS=Mus musculus OX=10090 GN=Ptpmt1 PE=1 SV=1	NA	NA	35	34
Met	Hepatocyte growth factor receptor OS=Mus musculus OX=10090 GN=Met PE=1 SV=1	NA	NA	34	34
H1-5	Histone H1.5 OS=Mus musculus OX=10090 GN=H1-5 PE=1 SV=2	NA	NA	28	40
Mfap3	Microfibril-associated glycoprotein 3 OS=Mus musculus OX=10090 GN=Mfap3 PE=2 SV=1	NA	NA	37	31
Pcdhgb2	Protocadherin gamma B2 OS=Mus musculus OX=10090 GN=Pcdhgb2 PE=1 SV=1	NA	NA	34	34
Arrdc3	Arrestin domain-containing protein 3 OS=Mus musculus OX=10090 GN=Arrdc3 PE=2 SV=1	NA	NA	34	33
Sec63	Translocation protein SEC63 homolog OS=Mus musculus OX=10090 GN=Sec63 PE=1 SV=4	NA	NA	33	34
Abcc4	ATP-binding cassette sub-family C (CFTR/MRP) member 4 OS=Mus musculus OX=10090 GN=Abcc4 PE=1 SV=1	NA	NA	37	29
Aup1	Lipid droplet-regulating VLDL assembly factor AUP1 OS=Mus musculus OX=10090 GN=Aup1 PE=1 SV=1	NA	NA	36	30
Lrp10	Low-density lipoprotein receptor-related protein 10 OS=Mus musculus OX=10090 GN=Lrp10 PE=2 SV=2	NA	NA	31	35
Plxnb1	Plexin-B1 OS=Mus musculus OX=10090 GN=Plxnb1 PE=1 SV=2	NA	NA	35	30
Tgfbr1	Receptor protein serine/threonine kinase OS=Mus musculus OX=10090 GN=Tgfbr1 PE=1 SV=1	NA	NA	31	34
Scamp1	Secretory carrier-associated membrane protein 1 OS=Mus musculus OX=10090 GN=Scamp1 PE=1 SV=1	NA	NA	33	32
Atrn	Attractin OS=Mus musculus OX=10090 GN=Atrn PE=1 SV=3	NA	NA	35	28
Ccdc47	Coiled-coil domain-containing protein 47 OS=Mus musculus OX=10090 GN=Ccdc47 PE=1 SV=2	NA	NA	32	31
Atp13a3	Probable cation-transporting ATPase 13A3 OS=Mus musculus OX=10090 GN=Atp13a3 PE=1 SV=1	NA	NA	34	29
Comtd1	Catechol O-methyltransferase domain-containing protein 1 OS=Mus musculus OX=10090 GN=Comtd1 PE=1 SV=1	NA	NA	34	28
Tmem176a	Transmembrane protein 176A OS=Mus musculus OX=10090 GN=Tmem176a PE=1 SV=2	NA	NA	31	31
Zw10	Centromere/kinetochore protein zw10 homolog OS=Mus musculus OX=10090 GN=Zw10 PE=1 SV=3	NA	NA	31	30
Ggt7	Glutathione hydrolase 7 OS=Mus musculus OX=10090 GN=Ggt7 PE=1 SV=2	NA	NA	31	30
Itm2c	Integral membrane protein 2C OS=Mus musculus OX=10090 GN=Itm2c PE=1 SV=2	NA	NA	29	32
Adam10	Disintegrin and metalloproteinase domain-containing protein 10 OS=Mus musculus OX=10090 GN=Adam10 PE=1 SV=2	NA	NA	30	30
Cnnm3	Metal transporter CNNM3 OS=Mus musculus OX=10090 GN=Cnnm3 PE=1 SV=2	NA	NA	32	28
Zdhhc20	Palmitoyltransferase ZDHHC20 OS=Mus musculus OX=10090 GN=Zdhhc20 PE=1 SV=1	NA	NA	31	29
Cip2a	Protein CIP2A OS=Mus musculus OX=10090 GN=Cip2a PE=1 SV=1	NA	NA	32	28
Snx27	Sorting nexin-27 OS=Mus musculus OX=10090 GN=Snx27 PE=1 SV=2	NA	NA	26	34
Spred1	Sprouty-related EVH1 domain-containing protein 1 OS=Mus musculus OX=10090 GN=Spred1 PE=1 SV=1	NA	NA	29	31
Wdfy1	WD repeat and FYVE domain-containing protein 1 OS=Mus musculus OX=10090 GN=Wdfy1 PE=1 SV=1	NA	NA	30	30
Gaa	Lysosomal alpha-glucosidase OS=Mus musculus OX=10090 GN=Gaa PE=1 SV=2	NA	NA	31	28
Scfd1	Sec1 family domain-containing protein 1 OS=Mus musculus OX=10090 GN=Scfd1 PE=1 SV=1	NA	NA	33	26
Chchd6	MICOS complex subunit Mic25 OS=Mus musculus OX=10090 GN=Chchd6 PE=1 SV=2	NA	NA	31	27
Abcc1	Multidrug resistance-associated protein 1 OS=Mus musculus OX=10090 GN=Abcc1 PE=1 SV=1	NA	NA	30	28
Plekhh3	Pleckstrin homology domain-containing family H member 3 OS=Mus musculus OX=10090 GN=Plekhh3 PE=2 SV=1	NA	NA	31	26
Smpd4	Sphingomyelin phosphodiesterase 4 OS=Mus musculus OX=10090 GN=Smpd4 PE=1 SV=1	NA	NA	28	29
Cers2	Ceramide synthase 2 OS=Mus musculus OX=10090 GN=Cers2 PE=1 SV=1	NA	NA	28	28
Atp1a4	Sodium/potassium-transporting ATPase subunit alpha-4 OS=Mus musculus OX=10090 GN=Atp1a4 PE=1 SV=3	NA	NA	29	27
Slc12a9	Solute carrier family 12 member 9 OS=Mus musculus OX=10090 GN=Slc12a9 PE=1 SV=2	NA	NA	29	27
Tmem30a	Cell cycle control protein 50A OS=Mus musculus OX=10090 GN=Tmem30a PE=1 SV=1	NA	NA	28	27
Sptlc1	Serine palmitoyltransferase 1 OS=Mus musculus OX=10090 GN=Sptlc1 PE=1 SV=2	NA	NA	30	25
Rnf19a	E3 ubiquitin-protein ligase RNF19A OS=Mus musculus OX=10090 GN=Rnf19a PE=1 SV=2	NA	NA	30	24
Il1rap	Interleukin-1 receptor accessory protein OS=Mus musculus OX=10090 GN=Il1rap PE=1 SV=1	NA	NA	28	26
Rab1b	Ras-related protein Rab-1B OS=Mus musculus OX=10090 GN=Rab1b PE=1 SV=1	NA	NA	28	26
Slc6a6	Sodium- and chloride-dependent taurine transporter OS=Mus musculus OX=10090 GN=Slc6a6 PE=1 SV=2	NA	NA	32	22
Iars1	Isoleucine--tRNA ligase cytoplasmic OS=Mus musculus OX=10090 GN=Iars1 PE=1 SV=2	NA	NA	27	26
Nup210	Nuclear pore membrane glycoprotein 210 OS=Mus musculus OX=10090 GN=Nup210 PE=1 SV=1	NA	NA	33	20
Gm20671	Phosphatidylserine decarboxylase (Fragment) OS=Mus musculus OX=10090 GN=Gm20671 PE=3 SV=1	NA	NA	28	25
Pisd	Phosphatidylserine decarboxylase proenzyme mitochondrial OS=Mus musculus OX=10090 GN=Pisd PE=2 SV=1	NA	NA	28	25
Tmx4	Thioredoxin-related transmembrane protein 4 OS=Mus musculus OX=10090 GN=Tmx4 PE=1 SV=2	NA	NA	25	28
Tnpo3	Transportin-3 OS=Mus musculus OX=10090 GN=Tnpo3 PE=1 SV=1	NA	NA	28	25
Tnfrsf1a	Tumor necrosis factor receptor superfamily member 1A OS=Mus musculus OX=10090 GN=Tnfrsf1a PE=1 SV=1	NA	NA	26	27
Napa	Alpha-soluble NSF attachment protein OS=Mus musculus OX=10090 GN=Napa PE=1 SV=1	NA	NA	26	26
Csnk1e	Casein kinase I isoform epsilon OS=Mus musculus OX=10090 GN=Csnk1e PE=1 SV=2	NA	NA	29	23
Stard3	StAR-related lipid transfer protein 3 OS=Mus musculus OX=10090 GN=Stard3 PE=1 SV=1	NA	NA	29	23
Stx7	Syntaxin-7 OS=Mus musculus OX=10090 GN=Stx7 PE=1 SV=1	NA	NA	26	26
Abcc5	Multidrug resistance-associated protein 5 OS=Mus musculus OX=10090 GN=Abcc5 PE=1 SV=2	NA	NA	28	23
Tmem63b	CSC1-like protein 2 OS=Mus musculus OX=10090 GN=Tmem63b PE=1 SV=1	NA	NA	24	26
Gja1	Gap junction alpha-1 protein OS=Mus musculus OX=10090 GN=Gja1 PE=1 SV=2	NA	NA	25	24
Ifitm3	Interferon-induced transmembrane protein 3 OS=Mus musculus OX=10090 GN=Ifitm3 PE=1 SV=1	NA	NA	24	25
Cnnm4	Metal transporter CNNM4 OS=Mus musculus OX=10090 GN=Cnnm4 PE=1 SV=2	NA	NA	25	24
Igsf3	Immunoglobulin superfamily member 3 OS=Mus musculus OX=10090 GN=Igsf3 PE=1 SV=2	NA	NA	24	24
Aplp2	Amyloid-like protein 2 OS=Mus musculus OX=10090 GN=Aplp2 PE=1 SV=1	NA	NA	26	21
Ankrd46	Ankyrin repeat domain-containing protein 46 OS=Mus musculus OX=10090 GN=Ankrd46 PE=1 SV=1	NA	NA	22	25
Gnptg	N-acetylglucosamine-1-phosphotransferase subunit gamma OS=Mus musculus OX=10090 GN=Gnptg PE=1 SV=1	NA	NA	22	25
Neto2	Neto2 protein OS=Mus musculus OX=10090 GN=Neto2 PE=1 SV=1	NA	NA	24	23
Rhou	Rho-related GTP-binding protein RhoU OS=Mus musculus OX=10090 GN=Rhou PE=2 SV=1	NA	NA	22	25
Vps35	Vacuolar protein sorting-associated protein 35 OS=Mus musculus OX=10090 GN=Vps35 PE=1 SV=1	NA	NA	24	23
Atp6v1h	V-type proton ATPase subunit H OS=Mus musculus OX=10090 GN=Atp6v1h PE=1 SV=1	NA	NA	23	24
Mpst	3-mercaptopyruvate sulfurtransferase OS=Mus musculus OX=10090 GN=Mpst PE=1 SV=4	NA	NA	26	20
Ubr4	E3 ubiquitin-protein ligase UBR4 OS=Mus musculus OX=10090 GN=Ubr4 PE=1 SV=1	NA	NA	23	23
Ezr	Ezrin OS=Mus musculus OX=10090 GN=Ezr PE=1 SV=3	NA	NA	28	18
Il17ra	Interleukin-17 receptor A OS=Mus musculus OX=10090 GN=Il17ra PE=1 SV=1	NA	NA	24	22
Kit	Mast/stem cell growth factor receptor Kit OS=Mus musculus OX=10090 GN=Kit PE=1 SV=3	NA	NA	22	24
Neo1	Neogenin OS=Mus musculus OX=10090 GN=Neo1 PE=1 SV=1	NA	NA	25	21
Rala	Ras-related protein Ral-A OS=Mus musculus OX=10090 GN=Rala PE=1 SV=1	NA	NA	24	22
Ralb	Ras-related protein Ral-B OS=Mus musculus OX=10090 GN=Ralb PE=1 SV=1	NA	NA	24	22
Tbc1d15	TBC1 domain family member 15 OS=Mus musculus OX=10090 GN=Tbc1d15 PE=1 SV=1	NA	NA	23	23
Rab7a	Ras-related protein Rab-7a OS=Mus musculus OX=10090 GN=Rab7a PE=1 SV=2	NA	NA	21	24
Ankrd13a	Ankyrin repeat domain-containing protein 13A OS=Mus musculus OX=10090 GN=Ankrd13a PE=1 SV=2	NA	NA	20	24
Cdh19	Cadherin 19 type 2 OS=Mus musculus OX=10090 GN=Cdh19 PE=1 SV=1	NA	NA	21	23
Far1	Fatty acyl-CoA reductase 1 OS=Mus musculus OX=10090 GN=Far1 PE=1 SV=1	NA	NA	23	21
Ifnar1	Interferon alpha/beta receptor 1 OS=Mus musculus OX=10090 GN=Ifnar1 PE=1 SV=2	NA	NA	25	19
Ldlr	Low-density lipoprotein receptor OS=Mus musculus OX=10090 GN=Ldlr PE=1 SV=2	NA	NA	23	21
Clptm1	Cleft lip and palate transmembrane protein 1 homolog OS=Mus musculus OX=10090 GN=Clptm1 PE=1 SV=1	NA	NA	23	20
Kcmf1	E3 ubiquitin-protein ligase KCMF1 OS=Mus musculus OX=10090 GN=Kcmf1 PE=1 SV=1	NA	NA	24	19
Ubr2	E3 ubiquitin-protein ligase UBR2 OS=Mus musculus OX=10090 GN=Ubr2 PE=1 SV=2	NA	NA	27	16
Eng	Endoglin OS=Mus musculus OX=10090 GN=Eng PE=1 SV=1	NA	NA	22	21
Ndufs1	NADH-ubiquinone oxidoreductase 75 kDa subunit mitochondrial OS=Mus musculus OX=10090 GN=Ndufs1 PE=1 SV=2	NA	NA	22	21
Tmem168	Transmembrane protein 168 OS=Mus musculus OX=10090 GN=Tmem168 PE=1 SV=1	NA	NA	25	18
Dcbld2	Discoidin CUB and LCCL domain-containing protein 2 OS=Mus musculus OX=10090 GN=Dcbld2 PE=1 SV=1	NA	NA	23	19
Lrp5	Low-density lipoprotein receptor-related protein 5 OS=Mus musculus OX=10090 GN=Lrp5 PE=1 SV=3	NA	NA	21	21
Galnt2	Polypeptide N-acetylgalactosaminyltransferase 2 OS=Mus musculus OX=10090 GN=Galnt2 PE=1 SV=1	NA	NA	17	25
Stom	Stomatin OS=Mus musculus OX=10090 GN=Stom PE=1 SV=3	NA	NA	23	19
Adcy3	Adenylate cyclase type 3 OS=Mus musculus OX=10090 GN=Adcy3 PE=1 SV=1	NA	NA	22	19
Adcy7	Adenylate cyclase type 7 OS=Mus musculus OX=10090 GN=Adcy7 PE=1 SV=2	NA	NA	22	19
Timm23	Mitochondrial import inner membrane translocase subunit TIM23 OS=Mus musculus OX=10090 GN=Timm23 PE=1 SV=1	NA	NA	20	21
Vac14	Protein VAC14 homolog OS=Mus musculus OX=10090 GN=Vac14 PE=1 SV=1	NA	NA	23	18
Rpa2	Replication protein A 32 kDa subunit OS=Mus musculus OX=10090 GN=Rpa2 PE=1 SV=1	NA	NA	22	19
Asph	Aspartyl/asparaginyl beta-hydroxylase OS=Mus musculus OX=10090 GN=Asph PE=1 SV=1	NA	NA	17	23
Atp5pd	ATP synthase subunit d mitochondrial OS=Mus musculus OX=10090 GN=Atp5pd PE=1 SV=3	NA	NA	20	20
Atrnl1	Attractin-like protein 1 OS=Mus musculus OX=10090 GN=Atrnl1 PE=1 SV=2	NA	NA	22	18
Bag5	BAG family molecular chaperone regulator 5 OS=Mus musculus OX=10090 GN=Bag5 PE=1 SV=1	NA	NA	18	22
Bace2	Beta-secretase 2 OS=Mus musculus OX=10090 GN=Bace2 PE=1 SV=1	NA	NA	22	18
Tomm40	Mitochondrial import receptor subunit TOM40 homolog OS=Mus musculus OX=10090 GN=Tomm40 PE=1 SV=3	NA	NA	20	20
Slc38a2	Sodium-coupled neutral amino acid transporter 2 OS=Mus musculus OX=10090 GN=Slc38a2 PE=1 SV=1	NA	NA	21	19
Tmx1	Thioredoxin-related transmembrane protein 1 OS=Mus musculus OX=10090 GN=Tmx1 PE=1 SV=1	NA	NA	23	17
Hvcn1	Voltage-gated hydrogen channel 1 OS=Mus musculus OX=10090 GN=Hvcn1 PE=1 SV=2	NA	NA	22	18
Alg2	Alpha-1 3/1 6-mannosyltransferase ALG2 OS=Mus musculus OX=10090 GN=Alg2 PE=1 SV=2	NA	NA	18	21
Ca14	Carbonic anhydrase 14 OS=Mus musculus OX=10090 GN=Ca14 PE=1 SV=1	NA	NA	19	20
Ugcg	Ceramide glucosyltransferase OS=Mus musculus OX=10090 GN=Ugcg PE=1 SV=1	NA	NA	21	18
Stt3a	Dolichyl-diphosphooligosaccharide--protein glycosyltransferase subunit STT3A OS=Mus musculus OX=10090 GN=Stt3a PE=1 SV=1	NA	NA	21	18
Slc4a8	Electroneutral sodium bicarbonate exchanger 1 OS=Mus musculus OX=10090 GN=Slc4a8 PE=2 SV=1	NA	NA	21	18
Ifitm2	Interferon-induced transmembrane protein 2 OS=Mus musculus OX=10090 GN=Ifitm2 PE=1 SV=1	NA	NA	20	19
Epha7	Receptor protein-tyrosine kinase OS=Mus musculus OX=10090 GN=Epha7 PE=1 SV=1	NA	NA	18	21
Tmcc2	Transmembrane and coiled-coil domains protein 2 OS=Mus musculus OX=10090 GN=Tmcc2 PE=1 SV=1	NA	NA	20	19
Agk	Acylglycerol kinase mitochondrial OS=Mus musculus OX=10090 GN=Agk PE=1 SV=1	NA	NA	21	17
Antxr2	Anthrax toxin receptor 2 OS=Mus musculus OX=10090 GN=Antxr2 PE=1 SV=1	NA	NA	18	20
Cerk	Ceramide kinase OS=Mus musculus OX=10090 GN=Cerk PE=1 SV=2	NA	NA	19	19
Dync1li1	Cytoplasmic dynein 1 light intermediate chain 1 OS=Mus musculus OX=10090 GN=Dync1li1 PE=1 SV=1	NA	NA	21	17
Eno2	Gamma-enolase OS=Mus musculus OX=10090 GN=Eno2 PE=1 SV=2	NA	NA	20	18
Slc7a1	High affinity cationic amino acid transporter 1 OS=Mus musculus OX=10090 GN=Slc7a1 PE=1 SV=1	NA	NA	22	16
Igsf8	Immunoglobulin superfamily member 8 OS=Mus musculus OX=10090 GN=Igsf8 PE=1 SV=1	NA	NA	20	18
Insr	Insulin receptor OS=Mus musculus OX=10090 GN=Insr PE=1 SV=2	NA	NA	21	17
Tm9sf4	Transmembrane 9 superfamily member 4 OS=Mus musculus OX=10090 GN=Tm9sf4 PE=1 SV=1	NA	NA	22	16
Pld3	5'-3' exonuclease PLD3 OS=Mus musculus OX=10090 GN=Pld3 PE=1 SV=1	NA	NA	21	16
Adam17	Disintegrin and metalloproteinase domain-containing protein 17 OS=Mus musculus OX=10090 GN=Adam17 PE=1 SV=3	NA	NA	18	19
Acsl3	Long-chain-fatty-acid--CoA ligase 3 OS=Mus musculus OX=10090 GN=Acsl3 PE=1 SV=2	NA	NA	21	16
Mreg	Melanoregulin OS=Mus musculus OX=10090 GN=Mreg PE=1 SV=1	NA	NA	20	17
Atp11a	Phospholipid-transporting ATPase OS=Mus musculus OX=10090 GN=Atp11a PE=1 SV=1	NA	NA	18	19
Slc20a1	Sodium-dependent phosphate transporter 1 OS=Mus musculus OX=10090 GN=Slc20a1 PE=1 SV=1	NA	NA	18	19
Snx3	Sorting nexin-3 OS=Mus musculus OX=10090 GN=Snx3 PE=1 SV=1	NA	NA	20	17
Ankib1	Ankyrin repeat and IBR domain-containing protein 1 OS=Mus musculus OX=10090 GN=Ankib1 PE=1 SV=2	NA	NA	19	17
Ano6	Anoctamin-6 OS=Mus musculus OX=10090 GN=Ano6 PE=1 SV=1	NA	NA	16	20
Znrf3	E3 ubiquitin-protein ligase ZNRF3 OS=Mus musculus OX=10090 GN=Znrf3 PE=1 SV=1	NA	NA	18	18
Pom121	Nuclear envelope pore membrane protein POM 121 OS=Mus musculus OX=10090 GN=Pom121 PE=1 SV=2	NA	NA	19	17
Sh3pxd2b	SH3 and PX domain-containing protein 2B OS=Mus musculus OX=10090 GN=Sh3pxd2b PE=1 SV=1	NA	NA	20	16
Tulp4	Tubby-related protein 4 OS=Mus musculus OX=10090 GN=Tulp4 PE=1 SV=1	NA	NA	19	17
Tyro3	Tyrosine-protein kinase receptor TYRO3 OS=Mus musculus OX=10090 GN=Tyro3 PE=1 SV=2	NA	NA	17	19
Aaas	Aladin OS=Mus musculus OX=10090 GN=Aaas PE=1 SV=1	NA	NA	18	17
Adam9	Disintegrin and metalloproteinase domain-containing protein 9 OS=Mus musculus OX=10090 GN=Adam9 PE=1 SV=2	NA	NA	19	16
Sgce	Epsilon-sarcoglycan OS=Mus musculus OX=10090 GN=Sgce PE=1 SV=2	NA	NA	19	16
Gna12	Guanine nucleotide-binding protein subunit alpha-12 OS=Mus musculus OX=10090 GN=Gna12 PE=1 SV=3	NA	NA	17	18
Gna14	Guanine nucleotide-binding protein subunit alpha-14 OS=Mus musculus OX=10090 GN=Gna14 PE=1 SV=2	NA	NA	16	19
Pdgfra	Platelet-derived growth factor receptor alpha OS=Mus musculus OX=10090 GN=Pdgfra PE=1 SV=3	NA	NA	17	18
Ctdspl	Protein-serine/threonine phosphatase OS=Mus musculus OX=10090 GN=Ctdspl PE=1 SV=1	NA	NA	16	19
Retreg3	Reticulophagy regulator 3 OS=Mus musculus OX=10090 GN=Retreg3 PE=1 SV=1	NA	NA	20	15
Pds5a	Sister chromatid cohesion protein PDS5 homolog A OS=Mus musculus OX=10090 GN=Pds5a PE=1 SV=3	NA	NA	22	13
Frk	Tyrosine-protein kinase FRK OS=Mus musculus OX=10090 GN=Frk PE=1 SV=3	NA	NA	19	16
Ube3c	Ubiquitin-protein ligase E3C OS=Mus musculus OX=10090 GN=Ube3c PE=1 SV=2	NA	NA	16	19
Lman2	Vesicular integral-membrane protein VIP36 OS=Mus musculus OX=10090 GN=Lman2 PE=1 SV=2	NA	NA	16	19
Chpf	Chondroitin sulfate synthase 2 OS=Mus musculus OX=10090 GN=Chpf PE=1 SV=1	NA	NA	18	16
Itgb1	Integrin beta-1 OS=Mus musculus OX=10090 GN=Itgb1 PE=1 SV=1	NA	NA	17	17
Pgrmc2	Membrane-associated progesterone receptor component 2 OS=Mus musculus OX=10090 GN=Pgrmc2 PE=1 SV=2	NA	NA	17	17
Mpzl1	Myelin protein zero-like protein 1 OS=Mus musculus OX=10090 GN=Mpzl1 PE=1 SV=1	NA	NA	20	14
Stx8	Syntaxin-8 OS=Mus musculus OX=10090 GN=Stx8 PE=1 SV=1	NA	NA	19	15
Kiaa2013	Uncharacterized protein KIAA2013 OS=Mus musculus OX=10090 GN=Kiaa2013 PE=1 SV=1	NA	NA	18	16
Umps	Uridine 5'-monophosphate synthase OS=Mus musculus OX=10090 GN=Umps PE=1 SV=3	NA	NA	19	15
Aldh3b1	Aldehyde dehydrogenase family 3 member B1 OS=Mus musculus OX=10090 GN=Aldh3b1 PE=1 SV=1	NA	NA	17	16
Gbf1	Golgi-specific brefeldin A-resistance factor 1 OS=Mus musculus OX=10090 GN=Gbf1 PE=1 SV=1	NA	NA	17	16
Il10rb	Interleukin-10 receptor subunit beta OS=Mus musculus OX=10090 GN=Il10rb PE=1 SV=1	NA	NA	15	18
Lnpep	Leucyl-cystinyl aminopeptidase OS=Mus musculus OX=10090 GN=Lnpep PE=1 SV=1	NA	NA	18	15
Evc2	Limbin OS=Mus musculus OX=10090 GN=Evc2 PE=1 SV=1	NA	NA	18	15
Slc45a2	Membrane-associated transporter protein OS=Mus musculus OX=10090 GN=Slc45a2 PE=2 SV=1	NA	NA	17	16
Fam210b	Protein FAM210B mitochondrial OS=Mus musculus OX=10090 GN=Fam210b PE=1 SV=3	NA	NA	17	16
Scamp2	Secretory carrier-associated membrane protein 2 OS=Mus musculus OX=10090 GN=Scamp2 PE=1 SV=1	NA	NA	18	15
Slc20a2	Sodium-dependent phosphate transporter 2 OS=Mus musculus OX=10090 GN=Slc20a2 PE=1 SV=2	NA	NA	19	14
Stxbp1	Syntaxin-binding protein 1 OS=Mus musculus OX=10090 GN=Stxbp1 PE=1 SV=2	NA	NA	17	16
Igf1r	Tyrosine-protein kinase receptor OS=Mus musculus OX=10090 GN=Igf1r PE=1 SV=1	NA	NA	16	17
Cherp	Calcium homeostasis endoplasmic reticulum protein OS=Mus musculus OX=10090 GN=Cherp PE=1 SV=2	NA	NA	20	12
Ldlrad3	Low-density lipoprotein receptor class A domain-containing protein 3 OS=Mus musculus OX=10090 GN=Ldlrad3 PE=1 SV=1	NA	NA	18	14
Slc12a4	Solute carrier family 12 member 4 OS=Mus musculus OX=10090 GN=Slc12a4 PE=1 SV=2	NA	NA	16	16
Stx4	Syntaxin-4 OS=Mus musculus OX=10090 GN=Stx4 PE=1 SV=1	NA	NA	16	16
Acvr1b	Activin receptor type-1B OS=Mus musculus OX=10090 GN=Acvr1b PE=1 SV=1	NA	NA	16	15
Adgrg1	Adhesion G-protein coupled receptor G1 OS=Mus musculus OX=10090 GN=Adgrg1 PE=1 SV=1	NA	NA	15	16
Rnf144a	E3 ubiquitin-protein ligase RNF144A OS=Mus musculus OX=10090 GN=Rnf144a PE=1 SV=1	NA	NA	15	16
Pigs	GPI transamidase component PIG-S OS=Mus musculus OX=10090 GN=Pigs PE=1 SV=3	NA	NA	13	18
Irgm1	Immunity-related GTPase family M protein 1 OS=Mus musculus OX=10090 GN=Irgm1 PE=1 SV=1	NA	NA	18	13
Rnf19b	RBR-type E3 ubiquitin transferase OS=Mus musculus OX=10090 GN=Rnf19b PE=1 SV=1	NA	NA	15	16
Sema4c	Semaphorin-4C OS=Mus musculus OX=10090 GN=Sema4c PE=1 SV=1	NA	NA	17	14
Evc	Ellis-van Creveld syndrome protein homolog OS=Mus musculus OX=10090 GN=Evc PE=1 SV=2	NA	NA	17	13
Ndufa10	NADH dehydrogenase [ubiquinone] 1 alpha subcomplex subunit 10 mitochondrial OS=Mus musculus OX=10090 GN=Ndufa10 PE=1 SV=1	NA	NA	14	16
Nup188	Nucleoporin NUP188 OS=Mus musculus OX=10090 GN=Nup188 PE=1 SV=2	NA	NA	14	16
Fkbp8	Peptidyl-prolyl cis-trans isomerase FKBP8 OS=Mus musculus OX=10090 GN=Fkbp8 PE=1 SV=2	NA	NA	12	18
Ptprk	Protein-tyrosine-phosphatase OS=Mus musculus OX=10090 GN=Ptprk PE=1 SV=1	NA	NA	16	14
Atp1b3	Sodium/potassium-transporting ATPase subunit beta-3 OS=Mus musculus OX=10090 GN=Atp1b3 PE=1 SV=1	NA	NA	16	14
Snx17	Sorting nexin-17 OS=Mus musculus OX=10090 GN=Snx17 PE=1 SV=2	NA	NA	15	15
Srebf1	Sterol regulatory element-binding protein 1 (Fragment) OS=Mus musculus OX=10090 GN=Srebf1 PE=1 SV=1	NA	NA	14	16
Cpd	Carboxypeptidase D OS=Mus musculus OX=10090 GN=Cpd PE=1 SV=2	NA	NA	14	15
Dcakd	Dephospho-CoA kinase domain-containing protein OS=Mus musculus OX=10090 GN=Dcakd PE=1 SV=1	NA	NA	18	11
Ipo11	Importin-11 OS=Mus musculus OX=10090 GN=Ipo11 PE=1 SV=1	NA	NA	17	12
Panx1	Pannexin-1 OS=Mus musculus OX=10090 GN=Panx1 PE=1 SV=3	NA	NA	14	15
Praf2	PRA1 family protein 2 OS=Mus musculus OX=10090 GN=Praf2 PE=1 SV=1	NA	NA	14	15
Pdia6	Protein disulfide-isomerase A6 OS=Mus musculus OX=10090 GN=Pdia6 PE=1 SV=1	NA	NA	16	13
Rras2	Ras-related protein R-Ras2 OS=Mus musculus OX=10090 GN=Rras2 PE=1 SV=1	NA	NA	14	15
Eif2b1	Translation initiation factor eIF-2B subunit alpha OS=Mus musculus OX=10090 GN=Eif2b1 PE=1 SV=1	NA	NA	14	15
Tm7sf3	Transmembrane 7 superfamily member 3 OS=Mus musculus OX=10090 GN=Tm7sf3 PE=2 SV=2	NA	NA	18	11
Vps45	Vacuolar protein sorting-associated protein 45 OS=Mus musculus OX=10090 GN=Vps45 PE=1 SV=1	NA	NA	14	15
Abcb6	ATP-binding cassette sub-family B member 6 mitochondrial OS=Mus musculus OX=10090 GN=Abcb6 PE=1 SV=1	NA	NA	14	14
Ctdsp2	Carboxy-terminal domain RNA polymerase II polypeptide A small phosphatase 2 OS=Mus musculus OX=10090 GN=Ctdsp2 PE=2 SV=1	NA	NA	15	13
Amfr	E3 ubiquitin-protein ligase AMFR OS=Mus musculus OX=10090 GN=Amfr PE=1 SV=2	NA	NA	14	14
Xpot	Exportin-T OS=Mus musculus OX=10090 GN=Xpot PE=1 SV=1	NA	NA	14	14
Itm2a	Integral membrane protein 2A OS=Mus musculus OX=10090 GN=Itm2a PE=2 SV=2	NA	NA	15	13
Klhl22	Kelch-like protein 22 OS=Mus musculus OX=10090 GN=Klhl22 PE=1 SV=1	NA	NA	14	14
Abhd12	Lysophosphatidylserine lipase ABHD12 OS=Mus musculus OX=10090 GN=Abhd12 PE=1 SV=2	NA	NA	15	13
Mtch1	Mitochondrial carrier homolog 1 OS=Mus musculus OX=10090 GN=Mtch1 PE=1 SV=1	NA	NA	15	13
Ttyh2	Protein tweety homolog 2 OS=Mus musculus OX=10090 GN=Ttyh2 PE=1 SV=1	NA	NA	13	15
Rab34	Rab34 OS=Mus musculus OX=10090 GN=Rab34 PE=1 SV=1	NA	NA	14	14
Rdh11	Retinol dehydrogenase 11 OS=Mus musculus OX=10090 GN=Rdh11 PE=1 SV=1	NA	NA	17	11
Tk1	Thymidine kinase cytosolic OS=Mus musculus OX=10090 GN=Tk1 PE=1 SV=3	NA	NA	14	14
Tmem51	Transmembrane protein 51 OS=Mus musculus OX=10090 GN=Tmem51 PE=1 SV=1	NA	NA	14	14
Cd44	CD44 antigen OS=Mus musculus OX=10090 GN=Cd44 PE=1 SV=1	NA	NA	14	13
Acad9	Complex I assembly factor ACAD9 mitochondrial OS=Mus musculus OX=10090 GN=Acad9 PE=1 SV=2	NA	NA	13	14
Dhdds	Dehydrodolichyl diphosphate synthase complex subunit Dhdds OS=Mus musculus OX=10090 GN=Dhdds PE=2 SV=1	NA	NA	15	12
Dnaaf5	Dynein assembly factor 5 axonemal OS=Mus musculus OX=10090 GN=Dnaaf5 PE=1 SV=1	NA	NA	15	12
Gpat4	Glycerol-3-phosphate acyltransferase 4 OS=Mus musculus OX=10090 GN=Gpat4 PE=1 SV=1	NA	NA	16	11
Kif5b	Kinesin-1 heavy chain OS=Mus musculus OX=10090 GN=Kif5b PE=1 SV=3	NA	NA	15	12
Spg21	Maspardin OS=Mus musculus OX=10090 GN=Spg21 PE=1 SV=1	NA	NA	13	14
Galnt7	N-acetylgalactosaminyltransferase 7 OS=Mus musculus OX=10090 GN=Galnt7 PE=1 SV=2	NA	NA	12	15
Unc5b	Netrin receptor UNC5B OS=Mus musculus OX=10090 GN=Unc5b PE=1 SV=1	NA	NA	12	15
Npdc1	Neural proliferation differentiation and control protein 1 (Fragment) OS=Mus musculus OX=10090 GN=Npdc1 PE=1 SV=1	NA	NA	13	14
Rab10	Ras-related protein Rab-10 OS=Mus musculus OX=10090 GN=Rab10 PE=1 SV=1	NA	NA	14	13
Rhobtb3	Rho-related BTB domain-containing protein 3 OS=Mus musculus OX=10090 GN=Rhobtb3 PE=2 SV=3	NA	NA	11	16
Sema6a	Semaphorin-6A OS=Mus musculus OX=10090 GN=Sema6a PE=1 SV=1	NA	NA	14	13
Stambp	STAM-binding protein OS=Mus musculus OX=10090 GN=Stambp PE=1 SV=1	NA	NA	11	16
Rhoa	Transforming protein RhoA OS=Mus musculus OX=10090 GN=Rhoa PE=1 SV=1	NA	NA	17	10
Guf1	Translation factor Guf1 mitochondrial OS=Mus musculus OX=10090 GN=Guf1 PE=1 SV=1	NA	NA	12	15
Wbp1l	WW domain binding protein 1-like OS=Mus musculus OX=10090 GN=Wbp1l PE=2 SV=1	NA	NA	13	14
Adamts1	A disintegrin and metalloproteinase with thrombospondin motifs 1 OS=Mus musculus OX=10090 GN=Adamts1 PE=1 SV=4	NA	NA	14	12
Prkacb	cAMP-dependent protein kinase catalytic subunit beta OS=Mus musculus OX=10090 GN=Prkacb PE=1 SV=2	NA	NA	13	13
Dnajb12	DnaJ homolog subfamily B member 12 OS=Mus musculus OX=10090 GN=Dnajb12 PE=1 SV=2	NA	NA	12	14
Rnf13	E3 ubiquitin-protein ligase RNF13 OS=Mus musculus OX=10090 GN=Rnf13 PE=1 SV=1	NA	NA	13	13
Esyt2	Extended synaptotagmin-2 OS=Mus musculus OX=10090 GN=Esyt2 PE=1 SV=1	NA	NA	12	14
Acsl5	Long-chain-fatty-acid--CoA ligase 5 OS=Mus musculus OX=10090 GN=Acsl5 PE=1 SV=1	NA	NA	15	11
Zdhhc15	Palmitoyltransferase ZDHHC15 OS=Mus musculus OX=10090 GN=Zdhhc15 PE=1 SV=1	NA	NA	14	12
Lamtor1	Ragulator complex protein LAMTOR1 OS=Mus musculus OX=10090 GN=Lamtor1 PE=1 SV=1	NA	NA	13	13
Rab35	Ras-related protein Rab-35 OS=Mus musculus OX=10090 GN=Rab35 PE=1 SV=1	NA	NA	13	13
Rab5a	Ras-related protein Rab-5A OS=Mus musculus OX=10090 GN=Rab5a PE=1 SV=1	NA	NA	14	12
Scarf2	Scavenger receptor class F member 2 OS=Mus musculus OX=10090 GN=Scarf2 PE=1 SV=1	NA	NA	11	15
Ppp2r5a	Serine/threonine-protein phosphatase 2A 56 kDa regulatory subunit alpha isoform OS=Mus musculus OX=10090 GN=Ppp2r5a PE=1 SV=1	NA	NA	15	11
Tbcd	Tubulin-specific chaperone D OS=Mus musculus OX=10090 GN=Tbcd PE=1 SV=1	NA	NA	15	11
St3gal6	Type 2 lactosamine alpha-2 3-sialyltransferase OS=Mus musculus OX=10090 GN=St3gal6 PE=2 SV=3	NA	NA	14	12
Lrrc8d	Volume-regulated anion channel subunit LRRC8D OS=Mus musculus OX=10090 GN=Lrrc8d PE=1 SV=1	NA	NA	13	13
Fam174b	Membrane protein FAM174B OS=Mus musculus OX=10090 GN=Fam174b PE=2 SV=2	NA	NA	14	11
Ncapg	Non-SMC condensin I complex subunit G OS=Mus musculus OX=10090 GN=Ncapg PE=1 SV=1	NA	NA	13	12
Sacm1l	Phosphatidylinositol-3-phosphatase SAC1 OS=Mus musculus OX=10090 GN=Sacm1l PE=1 SV=1	NA	NA	12	13
Fam3c	Protein FAM3C OS=Mus musculus OX=10090 GN=Fam3c PE=1 SV=1	NA	NA	12	13
Mon2	Protein MON2 homolog OS=Mus musculus OX=10090 GN=Mon2 PE=1 SV=1	NA	NA	17	8
Rap2b	Ras-related protein Rap-2b OS=Mus musculus OX=10090 GN=Rap2b PE=1 SV=1	NA	NA	15	10
Atp6ap2	Renin receptor OS=Mus musculus OX=10090 GN=Atp6ap2 PE=1 SV=2	NA	NA	9	16
Sppl2b	Signal peptide peptidase-like 2B OS=Mus musculus OX=10090 GN=Sppl2b PE=1 SV=2	NA	NA	14	11
Slc12a2	Solute carrier family 12 member 2 OS=Mus musculus OX=10090 GN=Slc12a2 PE=1 SV=1	NA	NA	15	10
Mrpl16	39S ribosomal protein L16 mitochondrial OS=Mus musculus OX=10090 GN=Mrpl16 PE=1 SV=1	NA	NA	10	14
Mgat5	Alpha-1 6-mannosylglycoprotein 6-beta-N-acetylglucosaminyltransferase A OS=Mus musculus OX=10090 GN=Mgat5 PE=1 SV=1	NA	NA	13	11
Man2a1	Alpha-mannosidase 2 OS=Mus musculus OX=10090 GN=Man2a1 PE=1 SV=2	NA	NA	12	12
Btaf1	B-TFIID TATA-box-binding protein-associated factor 1 OS=Mus musculus OX=10090 GN=Btaf1 PE=1 SV=1	NA	NA	15	9
M6pr	Cation-dependent mannose-6-phosphate receptor OS=Mus musculus OX=10090 GN=M6pr PE=1 SV=1	NA	NA	14	10
Cdc42ep1	Cdc42 effector protein 1 OS=Mus musculus OX=10090 GN=Cdc42ep1 PE=1 SV=1	NA	NA	12	12
Mtco2	Cytochrome c oxidase subunit 2 OS=Mus musculus OX=10090 GN=Mtco2 PE=1 SV=1	NA	NA	11	13
Glce	D-glucuronyl C5-epimerase OS=Mus musculus OX=10090 GN=Glce PE=1 SV=2	NA	NA	10	14
Map2k2	Dual-specificity mitogen-activated protein kinase kinase 2 OS=Mus musculus OX=10090 GN=Map2k2 PE=1 SV=1	NA	NA	12	12
Gsk3b	Glycogen synthase kinase-3 beta OS=Mus musculus OX=10090 GN=Gsk3b PE=1 SV=2	NA	NA	14	10
Klhl13	Kelch-like protein 13 OS=Mus musculus OX=10090 GN=Klhl13 PE=2 SV=3	NA	NA	12	12
Lpcat2	Lysophosphatidylcholine acyltransferase 2 OS=Mus musculus OX=10090 GN=Lpcat2 PE=1 SV=1	NA	NA	13	11
Mlec	Malectin OS=Mus musculus OX=10090 GN=Mlec PE=1 SV=2	NA	NA	11	13
Nectin3	Nectin-3 OS=Mus musculus OX=10090 GN=Nectin3 PE=1 SV=1	NA	NA	12	12
Fam234b	Protein FAM234B OS=Mus musculus OX=10090 GN=Fam234b PE=1 SV=1	NA	NA	11	13
Rasal3	RAS protein activator-like-3 OS=Mus musculus OX=10090 GN=Rasal3 PE=1 SV=1	NA	NA	10	14
Rnf11	RING finger protein 11 (Fragment) OS=Mus musculus OX=10090 GN=Rnf11 PE=1 SV=1	NA	NA	11	13
Snx12	Sorting nexin-12 OS=Mus musculus OX=10090 GN=Snx12 PE=1 SV=1	NA	NA	13	11
Sec22b	Vesicle-trafficking protein SEC22b OS=Mus musculus OX=10090 GN=Sec22b PE=1 SV=3	NA	NA	13	11
Fads2	Acyl-CoA 6-desaturase OS=Mus musculus OX=10090 GN=Fads2 PE=1 SV=1	NA	NA	15	8
Abhd17b	Alpha/beta hydrolase domain-containing protein 17B OS=Mus musculus OX=10090 GN=Abhd17b PE=1 SV=1	NA	NA	11	12
Bax	Apoptosis regulator BAX OS=Mus musculus OX=10090 GN=Bax PE=1 SV=1	NA	NA	13	10
Bag3	BAG family molecular chaperone regulator 3 OS=Mus musculus OX=10090 GN=Bag3 PE=1 SV=2	NA	NA	12	11
Hs2st1	Heparan sulfate 2-O-sulfotransferase 1 OS=Mus musculus OX=10090 GN=Hs2st1 PE=1 SV=2	NA	NA	14	9
Dgcr2	Integral membrane protein DGCR2/IDD OS=Mus musculus OX=10090 GN=Dgcr2 PE=4 SV=1	NA	NA	13	10
Napepld	N-acyl-phosphatidylethanolamine-hydrolyzing phospholipase D OS=Mus musculus OX=10090 GN=Napepld PE=1 SV=1	NA	NA	9	14
Gm20518	Predicted gene 20518 OS=Mus musculus OX=10090 GN=Gm20518 PE=4 SV=1	NA	NA	13	10
Mro	Protein maestro OS=Mus musculus OX=10090 GN=Mro PE=4 SV=1	NA	NA	11	12
Rab18	Ras-related protein Rab-18 OS=Mus musculus OX=10090 GN=Rab18 PE=1 SV=2	NA	NA	10	13
Slc25a1	Tricarboxylate transport protein mitochondrial OS=Mus musculus OX=10090 GN=Slc25a1 PE=1 SV=1	NA	NA	12	11
Tnfrsf19	Tumor necrosis factor receptor superfamily member 19 OS=Mus musculus OX=10090 GN=Tnfrsf19 PE=1 SV=2	NA	NA	12	11
Ptpn23	Tyrosine-protein phosphatase non-receptor type 23 OS=Mus musculus OX=10090 GN=Ptpn23 PE=1 SV=2	NA	NA	14	9
Atp6v1e1	V-type proton ATPase subunit E 1 OS=Mus musculus OX=10090 GN=Atp6v1e1 PE=1 SV=2	NA	NA	11	12
Adcy6	Adenylate cyclase type 6 OS=Mus musculus OX=10090 GN=Adcy6 PE=1 SV=1	NA	NA	10	12
Bcap29	B-cell receptor-associated protein 29 OS=Mus musculus OX=10090 GN=Bcap29 PE=1 SV=1	NA	NA	13	9
B4galt7	Beta-1 4-galactosyltransferase 7 OS=Mus musculus OX=10090 GN=B4galt7 PE=2 SV=1	NA	NA	10	12
Bri3bp	BRI3-binding protein OS=Mus musculus OX=10090 GN=Bri3bp PE=1 SV=1	NA	NA	14	8
Cdk18	Cyclin-dependent kinase 18 OS=Mus musculus OX=10090 GN=Cdk18 PE=1 SV=1	NA	NA	10	12
Uqcrq	Cytochrome b-c1 complex subunit 8 OS=Mus musculus OX=10090 GN=Uqcrq PE=1 SV=3	NA	NA	12	10
Nus1	Dehydrodolichyl diphosphate synthase complex subunit Nus1 OS=Mus musculus OX=10090 GN=Nus1 PE=2 SV=1	NA	NA	12	10
Rnf128	E3 ubiquitin-protein ligase RNF128 OS=Mus musculus OX=10090 GN=Rnf128 PE=1 SV=1	NA	NA	12	10
Fndc3c1	Fibronectin type III domain containing protein 3C1 OS=Mus musculus OX=10090 GN=Fndc3c1 PE=2 SV=1	NA	NA	13	9
Slc25a32	Mitochondrial folate transporter/carrier (Fragment) OS=Mus musculus OX=10090 GN=Slc25a32 PE=1 SV=1	NA	NA	13	9
Timm17a	Mitochondrial import inner membrane translocase subunit Tim17-A OS=Mus musculus OX=10090 GN=Timm17a PE=1 SV=1	NA	NA	11	11
Ndufb10	NADH dehydrogenase [ubiquinone] 1 beta subcomplex subunit 10 OS=Mus musculus OX=10090 GN=Ndufb10 PE=1 SV=3	NA	NA	11	11
Ncstn	Nicastrin OS=Mus musculus OX=10090 GN=Ncstn PE=1 SV=3	NA	NA	11	11
Nomo1	Nodal modulator 1 OS=Mus musculus OX=10090 GN=Nomo1 PE=1 SV=1	NA	NA	13	9
Ociad1	OCIA domain-containing protein 1 OS=Mus musculus OX=10090 GN=Ociad1 PE=1 SV=1	NA	NA	9	13
Atp11c	Phospholipid-transporting ATPase OS=Mus musculus OX=10090 GN=Atp11c PE=1 SV=1	NA	NA	12	10
Cnih4	Protein cornichon homolog 4 OS=Mus musculus OX=10090 GN=Cnih4 PE=1 SV=1	NA	NA	10	12
Rab6a	Ras-related protein Rab-6A OS=Mus musculus OX=10090 GN=Rab6a PE=1 SV=4	NA	NA	12	10
Rhoj	Rho-related GTP-binding protein RhoJ OS=Mus musculus OX=10090 GN=Rhoj PE=1 SV=2	NA	NA	12	10
Tyw1	S-adenosyl-L-methionine-dependent tRNA 4-demethylwyosine synthase TYW1 OS=Mus musculus OX=10090 GN=Tyw1 PE=1 SV=1	NA	NA	11	11
Ppp2r1b	Serine/threonine-protein phosphatase 2A 65 kDa regulatory subunit A beta isoform OS=Mus musculus OX=10090 GN=Ppp2r1b PE=1 SV=1	NA	NA	10	12
Snx8	Sorting nexin-8 OS=Mus musculus OX=10090 GN=Snx8 PE=1 SV=1	NA	NA	10	12
Stx2	Syntaxin-2 OS=Mus musculus OX=10090 GN=Stx2 PE=1 SV=1	NA	NA	12	10
Tmem132a	Transmembrane protein 132A OS=Mus musculus OX=10090 GN=Tmem132a PE=1 SV=2	NA	NA	12	10
Mrpl39	39S ribosomal protein L39 mitochondrial OS=Mus musculus OX=10090 GN=Mrpl39 PE=1 SV=4	NA	NA	13	8
Acvr2b	Activin receptor type-2B OS=Mus musculus OX=10090 GN=Acvr2b PE=1 SV=1	NA	NA	9	12
Mcam	Cell surface glycoprotein MUC18 OS=Mus musculus OX=10090 GN=Mcam PE=1 SV=1	NA	NA	10	11
Acsbg1	Long-chain-fatty-acid--CoA ligase ACSBG1 OS=Mus musculus OX=10090 GN=Acsbg1 PE=1 SV=1	NA	NA	8	13
Tyk2	Non-receptor tyrosine-protein kinase TYK2 OS=Mus musculus OX=10090 GN=Tyk2 PE=1 SV=3	NA	NA	11	10
Rhob	Rho-related GTP-binding protein RhoB OS=Mus musculus OX=10090 GN=Rhob PE=1 SV=1	NA	NA	13	8
Ppp2r5c	Serine/threonine-protein phosphatase 2A 56 kDa regulatory subunit gamma isoform OS=Mus musculus OX=10090 GN=Ppp2r5c PE=1 SV=2	NA	NA	10	11
Saraf	Store-operated calcium entry-associated regulatory factor OS=Mus musculus OX=10090 GN=Saraf PE=1 SV=2	NA	NA	10	11
Ryk	Tyrosine-protein kinase RYK OS=Mus musculus OX=10090 GN=Ryk PE=1 SV=2	NA	NA	11	10
Uxs1	UDP-glucuronic acid decarboxylase 1 OS=Mus musculus OX=10090 GN=Uxs1 PE=1 SV=1	NA	NA	10	11
Vps28	Vacuolar protein sorting-associated protein 28 homolog OS=Mus musculus OX=10090 GN=Vps28 PE=1 SV=1	NA	NA	11	10
Vps37b	Vacuolar protein sorting-associated protein 37B OS=Mus musculus OX=10090 GN=Vps37b PE=1 SV=1	NA	NA	12	9
Uqcrfs1	Cytochrome b-c1 complex subunit Rieske mitochondrial OS=Mus musculus OX=10090 GN=Uqcrfs1 PE=1 SV=1	NA	NA	10	10
Alg5	Dolichyl-phosphate beta-glucosyltransferase OS=Mus musculus OX=10090 GN=Alg5 PE=1 SV=1	NA	NA	10	10
Kct2	Keratinocyte-associated transmembrane protein 2 OS=Mus musculus OX=10090 GN=Kct2 PE=1 SV=2	NA	NA	10	10
Lgr4	Leucine-rich repeat-containing G-protein coupled receptor 4 OS=Mus musculus OX=10090 GN=Lgr4 PE=1 SV=1	NA	NA	11	9
Mavs	Mitochondrial antiviral-signaling protein OS=Mus musculus OX=10090 GN=Mavs PE=1 SV=1	NA	NA	8	12
Rngtt	mRNA-capping enzyme OS=Mus musculus OX=10090 GN=Rngtt PE=1 SV=1	NA	NA	12	8
Mcoln3	Mucolipin-3 OS=Mus musculus OX=10090 GN=Mcoln3 PE=1 SV=1	NA	NA	11	9
Nle1	Notchless protein homolog 1 OS=Mus musculus OX=10090 GN=Nle1 PE=1 SV=4	NA	NA	11	9
P2rx4	P2X purinoceptor OS=Mus musculus OX=10090 GN=P2rx4 PE=1 SV=2	NA	NA	8	12
Pnkd	Probable hydrolase PNKD OS=Mus musculus OX=10090 GN=Pnkd PE=1 SV=2	NA	NA	10	10
Plod2	Procollagen-lysine 2-oxoglutarate 5-dioxygenase 2 OS=Mus musculus OX=10090 GN=Plod2 PE=1 SV=2	NA	NA	11	9
Wls	Protein wntless homolog OS=Mus musculus OX=10090 GN=Wls PE=1 SV=1	NA	NA	11	9
Ranbp1	Ran-specific GTPase-activating protein OS=Mus musculus OX=10090 GN=Ranbp1 PE=1 SV=2	NA	NA	9	11
Rab8b	Ras-related protein Rab-8B OS=Mus musculus OX=10090 GN=Rab8b PE=1 SV=1	NA	NA	10	10
Erbb2	Receptor tyrosine-protein kinase erbB-2 OS=Mus musculus OX=10090 GN=Erbb2 PE=1 SV=3	NA	NA	10	10
Rhoc	Rho-related GTP-binding protein RhoC OS=Mus musculus OX=10090 GN=Rhoc PE=1 SV=2	NA	NA	12	8
9530068E07Rik	RIKEN cDNA 9530068E07 gene OS=Mus musculus OX=10090 GN=9530068E07Rik PE=1 SV=1	NA	NA	10	10
Rbms1	RNA-binding motif single-stranded-interacting protein 1 OS=Mus musculus OX=10090 GN=Rbms1 PE=1 SV=1	NA	NA	10	10
Ppp2r2d	Serine/threonine-protein phosphatase 2A 55 kDa regulatory subunit B delta isoform OS=Mus musculus OX=10090 GN=Ppp2r2d PE=1 SV=1	NA	NA	11	9
Snx5	Sorting nexin-5 OS=Mus musculus OX=10090 GN=Snx5 PE=1 SV=1	NA	NA	9	11
Tmem9b	Transmembrane protein 9B OS=Mus musculus OX=10090 GN=Tmem9b PE=1 SV=1	NA	NA	9	11
Tyr	Tyrosinase OS=Mus musculus OX=10090 GN=Tyr PE=1 SV=3	NA	NA	9	11
Uqcc1	Ubiquinol-cytochrome-c reductase complex assembly factor 1 OS=Mus musculus OX=10090 GN=Uqcc1 PE=1 SV=1	NA	NA	11	9
Znf281	Zinc finger protein 281 OS=Mus musculus OX=10090 GN=Znf281 PE=1 SV=1	NA	NA	8	12
Slc30a1	Zinc transporter 1 OS=Mus musculus OX=10090 GN=Slc30a1 PE=1 SV=1	NA	NA	9	11
Bnip2	BCL2/adenovirus E1B 19 kDa protein-interacting protein 2 OS=Mus musculus OX=10090 GN=Bnip2 PE=1 SV=1	NA	NA	10	9
Slc25a24	Calcium-binding mitochondrial carrier protein SCaMC-1 OS=Mus musculus OX=10090 GN=Slc25a24 PE=1 SV=1	NA	NA	9	10
Card19	Caspase recruitment domain-containing protein 19 OS=Mus musculus OX=10090 GN=Card19 PE=1 SV=1	NA	NA	10	9
Dagla	Diacylglycerol lipase-alpha OS=Mus musculus OX=10090 GN=Dagla PE=1 SV=2	NA	NA	10	9
Ltn1	E3 ubiquitin-protein ligase listerin OS=Mus musculus OX=10090 GN=Ltn1 PE=1 SV=3	NA	NA	12	7
Slc29a1	Equilibrative nucleoside transporter 1 OS=Mus musculus OX=10090 GN=Slc29a1 PE=1 SV=3	NA	NA	8	11
Fam171a1	Family with sequence similarity 171 member A1 OS=Mus musculus OX=10090 GN=Fam171a1 PE=1 SV=1	NA	NA	13	6
Faah	Fatty-acid amide hydrolase 1 OS=Mus musculus OX=10090 GN=Faah PE=1 SV=1	NA	NA	8	11
Laptm4b	Lysosomal-associated transmembrane protein 4B OS=Mus musculus OX=10090 GN=Laptm4b PE=2 SV=1	NA	NA	9	10
Man1a2	Mannosyl-oligosaccharide 1 2-alpha-mannosidase IB OS=Mus musculus OX=10090 GN=Man1a2 PE=1 SV=1	NA	NA	10	9
Micos13	MICOS complex subunit MIC13 OS=Mus musculus OX=10090 GN=Micos13 PE=1 SV=1	NA	NA	9	10
Mms19	MMS19 nucleotide excision repair protein homolog OS=Mus musculus OX=10090 GN=Mms19 PE=1 SV=1	NA	NA	10	9
Myof	Myoferlin OS=Mus musculus OX=10090 GN=Myof PE=1 SV=2	NA	NA	14	5
Ndufs3	NADH dehydrogenase [ubiquinone] iron-sulfur protein 3 mitochondrial OS=Mus musculus OX=10090 GN=Ndufs3 PE=1 SV=2	NA	NA	10	9
Atad1	Outer mitochondrial transmembrane helix translocase OS=Mus musculus OX=10090 GN=Atad1 PE=1 SV=1	NA	NA	9	10
Sgk3	Serine/threonine-protein kinase Sgk3 OS=Mus musculus OX=10090 GN=Sgk3 PE=1 SV=1	NA	NA	9	10
Slc38a1	Sodium-coupled neutral amino acid transporter 1 OS=Mus musculus OX=10090 GN=Slc38a1 PE=1 SV=1	NA	NA	10	9
Snx1	Sorting nexin-1 OS=Mus musculus OX=10090 GN=Snx1 PE=1 SV=1	NA	NA	11	8
Vamp3	Vesicle-associated membrane protein 3 OS=Mus musculus OX=10090 GN=Vamp3 PE=1 SV=1	NA	NA	10	9
Lrrc8c	Volume-regulated anion channel subunit LRRC8C OS=Mus musculus OX=10090 GN=Lrrc8c PE=1 SV=1	NA	NA	10	9
Atp6v1d	V-type proton ATPase subunit D OS=Mus musculus OX=10090 GN=Atp6v1d PE=1 SV=1	NA	NA	9	10
Rapsn	43 kDa receptor-associated protein of the synapse OS=Mus musculus OX=10090 GN=Rapsn PE=2 SV=4	NA	NA	8	10
Slc1a5	Amino acid transporter OS=Mus musculus OX=10090 GN=Slc1a5 PE=1 SV=1	NA	NA	8	10
Cope	Coatomer subunit epsilon OS=Mus musculus OX=10090 GN=Cope PE=1 SV=3	NA	NA	10	8
Tmem63a	CSC1-like protein 1 OS=Mus musculus OX=10090 GN=Tmem63a PE=1 SV=1	NA	NA	8	10
Dtl	Denticleless protein homolog OS=Mus musculus OX=10090 GN=Dtl PE=1 SV=2	NA	NA	7	11
Xpo7	Exportin-7 OS=Mus musculus OX=10090 GN=Xpo7 PE=1 SV=3	NA	NA	8	10
Fabp5	Fatty acid-binding protein 5 OS=Mus musculus OX=10090 GN=Fabp5 PE=1 SV=3	NA	NA	11	7
Pign	GPI ethanolamine phosphate transferase 1 OS=Mus musculus OX=10090 GN=Pign PE=1 SV=1	NA	NA	11	7
Hmox2	Heme oxygenase 2 OS=Mus musculus OX=10090 GN=Hmox2 PE=1 SV=1	NA	NA	11	7
Itm2b	Integral membrane protein 2B OS=Mus musculus OX=10090 GN=Itm2b PE=1 SV=1	NA	NA	10	8
Mtfr1l	Mitochondrial fission regulator 1-like OS=Mus musculus OX=10090 GN=Mtfr1l PE=1 SV=1	NA	NA	11	7
Psen1	Presenilin-1 OS=Mus musculus OX=10090 GN=Psen1 PE=1 SV=1	NA	NA	9	9
Fam171a2	Protein FAM171A2 OS=Mus musculus OX=10090 GN=Fam171a2 PE=1 SV=1	NA	NA	9	9
Ppp6r3	Serine/threonine-protein phosphatase 6 regulatory subunit 3 OS=Mus musculus OX=10090 GN=Ppp6r3 PE=1 SV=1	NA	NA	10	8
Soat1	Sterol O-acyltransferase 1 OS=Mus musculus OX=10090 GN=Soat1 PE=1 SV=2	NA	NA	8	10
Tes	Testin OS=Mus musculus OX=10090 GN=Tes PE=1 SV=1	NA	NA	7	11
Ptpn11	Tyrosine-protein phosphatase non-receptor type 11 OS=Mus musculus OX=10090 GN=Ptpn11 PE=1 SV=3	NA	NA	8	10
Golt1b	Vesicle transport protein GOT1B OS=Mus musculus OX=10090 GN=Golt1b PE=1 SV=1	NA	NA	7	11
Adipor1	Adiponectin receptor protein 1 OS=Mus musculus OX=10090 GN=Adipor1 PE=1 SV=1	NA	NA	9	8
Boc	Brother of CDO OS=Mus musculus OX=10090 GN=Boc PE=1 SV=2	NA	NA	10	7
Cul2	Cullin-2 OS=Mus musculus OX=10090 GN=Cul2 PE=1 SV=2	NA	NA	9	8
Gnpat	Dihydroxyacetone phosphate acyltransferase OS=Mus musculus OX=10090 GN=Gnpat PE=1 SV=1	NA	NA	9	8
Ehd4	EH domain-containing protein 4 OS=Mus musculus OX=10090 GN=Ehd4 PE=1 SV=1	NA	NA	7	10
Lgals8	Galectin-8 OS=Mus musculus OX=10090 GN=Lgals8 PE=1 SV=1	NA	NA	9	8
Ifngr1	Interferon gamma receptor 1 OS=Mus musculus OX=10090 GN=Ifngr1 PE=1 SV=3	NA	NA	8	9
Josd1	Josephin-1 OS=Mus musculus OX=10090 GN=Josd1 PE=1 SV=1	NA	NA	9	8
Rhot2	Mitochondrial Rho GTPase 2 OS=Mus musculus OX=10090 GN=Rhot2 PE=1 SV=1	NA	NA	10	7
Plekhb2	Pleckstrin homology domain-containing family B member 2 OS=Mus musculus OX=10090 GN=Plekhb2 PE=1 SV=1	NA	NA	8	9
Phb	Prohibitin OS=Mus musculus OX=10090 GN=Phb PE=1 SV=1	NA	NA	10	7
Ptp4a1	Protein tyrosine phosphatase type IVA 1 OS=Mus musculus OX=10090 GN=Ptp4a1 PE=1 SV=1	NA	NA	8	9
Rpa3	Replication protein A 14 kDa subunit OS=Mus musculus OX=10090 GN=Rpa3 PE=1 SV=1	NA	NA	10	7
Rhod	Rho-related GTP-binding protein RhoD OS=Mus musculus OX=10090 GN=Rhod PE=1 SV=1	NA	NA	11	6
Slc24a5	Sodium/potassium/calcium exchanger 5 OS=Mus musculus OX=10090 GN=Slc24a5 PE=2 SV=1	NA	NA	9	8
Vps29	Vacuolar protein sorting-associated protein 29 OS=Mus musculus OX=10090 GN=Vps29 PE=1 SV=1	NA	NA	7	10
Vti1a	Vesicle transport through interaction with t-SNAREs homolog 1A OS=Mus musculus OX=10090 GN=Vti1a PE=1 SV=1	NA	NA	9	8
Cyfip1	Cytoplasmic FMR1-interacting protein 1 OS=Mus musculus OX=10090 GN=Cyfip1 PE=1 SV=1	NA	NA	7	9
Dnajc16	DnaJ homolog subfamily C member 16 OS=Mus musculus OX=10090 GN=Dnajc16 PE=1 SV=2	NA	NA	9	7
Pigk	GPI-anchor transamidase OS=Mus musculus OX=10090 GN=Pigk PE=1 SV=2	NA	NA	9	7
Lmbrd2	G-protein coupled receptor-associated protein LMBRD2 OS=Mus musculus OX=10090 GN=Lmbrd2 PE=1 SV=1	NA	NA	8	8
Letmd1	LETM1 domain-containing protein 1 OS=Mus musculus OX=10090 GN=Letmd1 PE=1 SV=1	NA	NA	10	6
Lrig2	Leucine-rich repeats and immunoglobulin-like domains protein 2 OS=Mus musculus OX=10090 GN=Lrig2 PE=1 SV=1	NA	NA	8	8
Fis1	Mitochondrial fission 1 protein OS=Mus musculus OX=10090 GN=Fis1 PE=1 SV=1	NA	NA	8	8
Timm29	Mitochondrial import inner membrane translocase subunit Tim29 OS=Mus musculus OX=10090 GN=Timm29 PE=1 SV=1	NA	NA	7	9
Nrp1	Neuropilin-1 OS=Mus musculus OX=10090 GN=Nrp1 PE=1 SV=2	NA	NA	9	7
Rac1	Ras-related C3 botulinum toxin substrate 1 OS=Mus musculus OX=10090 GN=Rac1 PE=1 SV=1	NA	NA	6	10
Rab32	Ras-related protein Rab-32 OS=Mus musculus OX=10090 GN=Rab32 PE=1 SV=3	NA	NA	8	8
Arhgap1	Rho GTPase-activating protein 1 OS=Mus musculus OX=10090 GN=Arhgap1 PE=1 SV=1	NA	NA	6	10
Itfg1	T-cell immunomodulatory protein OS=Mus musculus OX=10090 GN=Itfg1 PE=1 SV=2	NA	NA	9	7
Relt	Tumor necrosis factor receptor superfamily member 19L OS=Mus musculus OX=10090 GN=Relt PE=1 SV=2	NA	NA	10	6
Atp6v1c1	V-type proton ATPase subunit C 1 OS=Mus musculus OX=10090 GN=Atp6v1c1 PE=1 SV=4	NA	NA	8	8
Wdtc1	WD and tetratricopeptide repeats protein 1 OS=Mus musculus OX=10090 GN=Wdtc1 PE=1 SV=1	NA	NA	8	8
Mrps23	28S ribosomal protein S23 mitochondrial OS=Mus musculus OX=10090 GN=Mrps23 PE=1 SV=1	NA	NA	7	8
Abhd17c	Alpha/beta hydrolase domain-containing protein 17C OS=Mus musculus OX=10090 GN=Abhd17c PE=1 SV=2	NA	NA	7	8
Arfgef1	Brefeldin A-inhibited guanine nucleotide-exchange protein 1 OS=Mus musculus OX=10090 GN=Arfgef1 PE=1 SV=1	NA	NA	8	7
Dcaf8	DDB1- and CUL4-associated factor 8 OS=Mus musculus OX=10090 GN=Dcaf8 PE=1 SV=1	NA	NA	9	6
Dtx2	E3 ubiquitin-protein ligase OS=Mus musculus OX=10090 GN=Dtx2 PE=1 SV=1	NA	NA	7	8
Grk6	G protein-coupled receptor kinase OS=Mus musculus OX=10090 GN=Grk6 PE=1 SV=1	NA	NA	5	10
Mvb12a	Multivesicular body subunit 12A OS=Mus musculus OX=10090 GN=Mvb12a PE=1 SV=1	NA	NA	7	8
Abhd16a	Phosphatidylserine lipase ABHD16A OS=Mus musculus OX=10090 GN=Abhd16a PE=1 SV=3	NA	NA	6	9
Psen2	Presenilin OS=Mus musculus OX=10090 GN=Psen2 PE=1 SV=1	NA	NA	9	6
Rer1	Protein RER1 OS=Mus musculus OX=10090 GN=Rer1 PE=1 SV=1	NA	NA	9	6
Pacc1	Proton-activated chloride channel OS=Mus musculus OX=10090 GN=Pacc1 PE=1 SV=1	NA	NA	8	7
Raf1	RAF proto-oncogene serine/threonine-protein kinase OS=Mus musculus OX=10090 GN=Raf1 PE=1 SV=2	NA	NA	6	9
Rab9a	Ras-related protein Rab-9A OS=Mus musculus OX=10090 GN=Rab9a PE=1 SV=1	NA	NA	7	8
Rras	Ras-related protein R-Ras OS=Mus musculus OX=10090 GN=Rras PE=1 SV=1	NA	NA	8	7
Scpep1	Retinoid-inducible serine carboxypeptidase OS=Mus musculus OX=10090 GN=Scpep1 PE=1 SV=2	NA	NA	8	7
Thada	Thyroid adenoma-associated protein homolog OS=Mus musculus OX=10090 GN=Thada PE=1 SV=1	NA	NA	9	6
Sox10	Transcription factor SOX-10 OS=Mus musculus OX=10090 GN=Sox10 PE=1 SV=2	NA	NA	8	7
Tmc6	Transmembrane channel-like protein 6 OS=Mus musculus OX=10090 GN=Tmc6 PE=1 SV=2	NA	NA	8	7
Tmc8	Transmembrane channel-like protein OS=Mus musculus OX=10090 GN=Tmc8 PE=1 SV=1	NA	NA	7	8
Tmed1	Transmembrane emp24 domain-containing protein 1 OS=Mus musculus OX=10090 GN=Tmed1 PE=1 SV=1	NA	NA	9	6
Trim59	Tripartite motif-containing protein 59 (Fragment) OS=Mus musculus OX=10090 GN=Trim59 PE=1 SV=1	NA	NA	8	7
Vps26a	Vacuolar protein sorting-associated protein 26A OS=Mus musculus OX=10090 GN=Vps26a PE=1 SV=1	NA	NA	7	8
Wdfy2	WD repeat and FYVE domain-containing protein 2 OS=Mus musculus OX=10090 GN=Wdfy2 PE=1 SV=2	NA	NA	7	8
Ackr3	Atypical chemokine receptor 3 OS=Mus musculus OX=10090 GN=Ackr3 PE=1 SV=2	NA	NA	6	8
Cox4i1	Cytochrome c oxidase subunit 4 isoform 1 mitochondrial OS=Mus musculus OX=10090 GN=Cox4i1 PE=1 SV=2	NA	NA	9	5
Ndufa4	Cytochrome c oxidase subunit NDUFA4 OS=Mus musculus OX=10090 GN=Ndufa4 PE=1 SV=1	NA	NA	7	7
Daglb	Diacylglycerol lipase-beta OS=Mus musculus OX=10090 GN=Daglb PE=1 SV=2	NA	NA	7	7
Dlgap4	Disks large-associated protein 4 OS=Mus musculus OX=10090 GN=Dlgap4 PE=1 SV=1	NA	NA	6	8
Grb2	Growth factor receptor-bound protein 2 OS=Mus musculus OX=10090 GN=Grb2 PE=1 SV=1	NA	NA	6	8
Hat1	Histone acetyltransferase type B catalytic subunit OS=Mus musculus OX=10090 GN=Hat1 PE=1 SV=1	NA	NA	7	7
Cux2	Homeobox protein cut-like 2 OS=Mus musculus OX=10090 GN=Cux2 PE=2 SV=2	NA	NA	7	7
Pgrmc1	Membrane-associated progesterone receptor component 1 OS=Mus musculus OX=10090 GN=Pgrmc1 PE=1 SV=4	NA	NA	8	6
Plaa	Phospholipase A-2-activating protein OS=Mus musculus OX=10090 GN=Plaa PE=1 SV=4	NA	NA	6	8
Tmem9	Proton-transporting V-type ATPase complex assembly regulator TMEM9 OS=Mus musculus OX=10090 GN=Tmem9 PE=1 SV=1	NA	NA	8	6
Rap2c	Ras-related protein Rap-2c OS=Mus musculus OX=10090 GN=Rap2c PE=1 SV=1	NA	NA	8	6
Rtn3	Reticulon-3 OS=Mus musculus OX=10090 GN=Rtn3 PE=1 SV=2	NA	NA	6	8
Rtn4	Reticulon-4 OS=Mus musculus OX=10090 GN=Rtn4 PE=1 SV=2	NA	NA	7	7
Stk16	Serine/threonine-protein kinase 16 OS=Mus musculus OX=10090 GN=Stk16 PE=1 SV=3	NA	NA	7	7
Trpv2	Transient receptor potential cation channel subfamily V member 2 OS=Mus musculus OX=10090 GN=Trpv2 PE=1 SV=2	NA	NA	8	6
Vps26b	Vacuolar protein sorting-associated protein 26B OS=Mus musculus OX=10090 GN=Vps26b PE=1 SV=1	NA	NA	8	6
Gga2	ADP-ribosylation factor-binding protein GGA2 OS=Mus musculus OX=10090 GN=Gga2 PE=1 SV=1	NA	NA	7	6
Afg3l1	AFG3-like protein 1 OS=Mus musculus OX=10090 GN=Afg3l1 PE=1 SV=2	NA	NA	7	6
Abhd17a	Alpha/beta hydrolase domain-containing protein 17A OS=Mus musculus OX=10090 GN=Abhd17a PE=1 SV=1	NA	NA	7	6
Cers5	Ceramide synthase 5 OS=Mus musculus OX=10090 GN=Cers5 PE=1 SV=1	NA	NA	6	7
Clcn6	Chloride transport protein 6 OS=Mus musculus OX=10090 GN=Clcn6 PE=1 SV=1	NA	NA	6	7
Clvs1	Clavesin-1 OS=Mus musculus OX=10090 GN=Clvs1 PE=1 SV=1	NA	NA	7	6
Cyb5b	Cytochrome b5 type B OS=Mus musculus OX=10090 GN=Cyb5b PE=1 SV=1	NA	NA	9	4
Stau2	Double-stranded RNA-binding protein Staufen homolog 2 OS=Mus musculus OX=10090 GN=Stau2 PE=1 SV=1	NA	NA	6	7
Rffl	E3 ubiquitin-protein ligase rififylin OS=Mus musculus OX=10090 GN=Rffl PE=1 SV=1	NA	NA	6	7
Xpo4	Exportin-4 OS=Mus musculus OX=10090 GN=Xpo4 PE=1 SV=2	NA	NA	8	5
Gpaa1	Glycosylphosphatidylinositol anchor attachment 1 protein OS=Mus musculus OX=10090 GN=Gpaa1 PE=1 SV=3	NA	NA	7	6
Gpc1	Glypican-1 OS=Mus musculus OX=10090 GN=Gpc1 PE=1 SV=1	NA	NA	5	8
Pigg	GPI ethanolamine phosphate transferase 2 OS=Mus musculus OX=10090 GN=Pigg PE=1 SV=1	NA	NA	6	7
Mfsd14b	Hippocampus abundant transcript-like protein 1 OS=Mus musculus OX=10090 GN=Mfsd14b PE=2 SV=3	NA	NA	6	7
Ighv1-4	Immunoglobulin heavy variable 1-4 (Fragment) OS=Mus musculus OX=10090 GN=Ighv1-4 PE=4 SV=1	NA	NA	5	8
Lrp4	Low-density lipoprotein receptor-related protein 4 OS=Mus musculus OX=10090 GN=Lrp4 PE=1 SV=3	NA	NA	4	9
Mitf	Microphthalmia-associated transcription factor OS=Mus musculus OX=10090 GN=Mitf PE=1 SV=1	NA	NA	8	5
Npc1	NPC intracellular cholesterol transporter 1 OS=Mus musculus OX=10090 GN=Npc1 PE=1 SV=2	NA	NA	7	6
Nop9	Nucleolar protein 9 OS=Mus musculus OX=10090 GN=Nop9 PE=1 SV=1	NA	NA	5	8
Zdhhc13	Palmitoyltransferase ZDHHC13 OS=Mus musculus OX=10090 GN=Zdhhc13 PE=1 SV=2	NA	NA	8	5
Galnt13	Polypeptide N-acetylgalactosaminyltransferase 13 OS=Mus musculus OX=10090 GN=Galnt13 PE=2 SV=1	NA	NA	8	5
Slc35a4	Probable UDP-sugar transporter protein SLC35A4 OS=Mus musculus OX=10090 GN=Slc35a4 PE=1 SV=1	NA	NA	8	5
Ptges2	Prostaglandin E synthase 2 OS=Mus musculus OX=10090 GN=Ptges2 PE=1 SV=3	NA	NA	4	9
Rab5b	Ras-related protein Rab-5B OS=Mus musculus OX=10090 GN=Rab5b PE=1 SV=1	NA	NA	7	6
Slc2a3	Solute carrier family 2 facilitated glucose transporter member 3 OS=Mus musculus OX=10090 GN=Slc2a3 PE=1 SV=1	NA	NA	7	6
Smpd2	Sphingomyelin phosphodiesterase 2 OS=Mus musculus OX=10090 GN=Smpd2 PE=1 SV=1	NA	NA	6	7
Ssr1	Translocon-associated protein subunit alpha OS=Mus musculus OX=10090 GN=Ssr1 PE=1 SV=1	NA	NA	6	7
Tmem115	Transmembrane protein 115 OS=Mus musculus OX=10090 GN=Tmem115 PE=1 SV=1	NA	NA	6	7
Sirpa	Tyrosine-protein phosphatase non-receptor type substrate 1 OS=Mus musculus OX=10090 GN=Sirpa PE=1 SV=2	NA	NA	7	6
Uqcc2	Ubiquinol-cytochrome-c reductase complex assembly factor 2 OS=Mus musculus OX=10090 GN=Uqcc2 PE=1 SV=1	NA	NA	6	7
Psmd9	26S proteasome non-ATPase regulatory subunit 9 OS=Mus musculus OX=10090 GN=Psmd9 PE=1 SV=1	NA	NA	6	6
Adgre5	Adhesion G protein-coupled receptor E5 OS=Mus musculus OX=10090 GN=Adgre5 PE=1 SV=1	NA	NA	5	7
Anxa5	Annexin A5 OS=Mus musculus OX=10090 GN=Anxa5 PE=1 SV=1	NA	NA	4	8
Ap1m1	AP-1 complex subunit mu-1 OS=Mus musculus OX=10090 GN=Ap1m1 PE=1 SV=3	NA	NA	8	4
Map2k1	Dual specificity mitogen-activated protein kinase kinase 1 OS=Mus musculus OX=10090 GN=Map2k1 PE=1 SV=2	NA	NA	7	5
Ergic1	Endoplasmic reticulum-Golgi intermediate compartment protein 1 OS=Mus musculus OX=10090 GN=Ergic1 PE=1 SV=1	NA	NA	5	7
Efna5	Ephrin-A5 OS=Mus musculus OX=10090 GN=Efna5 PE=1 SV=1	NA	NA	8	4
Gk	Glycerol kinase OS=Mus musculus OX=10090 GN=Gk PE=1 SV=1	NA	NA	8	4
Golim4	Golgi integral membrane protein 4 OS=Mus musculus OX=10090 GN=Golim4 PE=1 SV=1	NA	NA	6	6
Larp7	La-related protein 7 OS=Mus musculus OX=10090 GN=Larp7 PE=1 SV=2	NA	NA	6	6
Lmbrd1	Lysosomal cobalamin transport escort protein LMBD1 OS=Mus musculus OX=10090 GN=Lmbrd1 PE=1 SV=1	NA	NA	7	5
Ndufs7	NADH dehydrogenase [ubiquinone] iron-sulfur protein 7 mitochondrial OS=Mus musculus OX=10090 GN=Ndufs7 PE=1 SV=1	NA	NA	6	6
Pdf	Peptide deformylase OS=Mus musculus OX=10090 GN=Pdf PE=1 SV=1	NA	NA	3	9
Fkbp1a	Peptidyl-prolyl cis-trans isomerase FKBP1A OS=Mus musculus OX=10090 GN=Fkbp1a PE=1 SV=2	NA	NA	6	6
Cds2	Phosphatidate cytidylyltransferase 2 OS=Mus musculus OX=10090 GN=Cds2 PE=1 SV=1	NA	NA	6	6
Ttyh3	Protein tweety homolog 3 OS=Mus musculus OX=10090 GN=Ttyh3 PE=1 SV=1	NA	NA	7	5
Rragc	Ras-related GTP-binding protein C OS=Mus musculus OX=10090 GN=Rragc PE=1 SV=1	NA	NA	7	5
Rab31	Ras-related protein Rab-31 OS=Mus musculus OX=10090 GN=Rab31 PE=1 SV=1	NA	NA	5	7
Rap2a	Ras-related protein Rap-2a OS=Mus musculus OX=10090 GN=Rap2a PE=1 SV=2	NA	NA	7	5
Serinc1	Serine incorporator 1 OS=Mus musculus OX=10090 GN=Serinc1 PE=1 SV=1	NA	NA	5	7
Slc15a4	Solute carrier family 15 member 4 OS=Mus musculus OX=10090 GN=Slc15a4 PE=1 SV=1	NA	NA	6	6
Snx6	Sorting nexin-6 OS=Mus musculus OX=10090 GN=Snx6 PE=1 SV=2	NA	NA	7	5
Spred2	Sprouty-related EVH1 domain-containing protein 2 OS=Mus musculus OX=10090 GN=Spred2 PE=1 SV=1	NA	NA	6	6
Stk39	STE20/SPS1-related proline-alanine-rich protein kinase OS=Mus musculus OX=10090 GN=Stk39 PE=1 SV=1	NA	NA	7	5
Snap47	Synaptosomal-associated protein 47 OS=Mus musculus OX=10090 GN=Snap47 PE=1 SV=1	NA	NA	7	5
Tmem131	Transmembrane protein 131 OS=Mus musculus OX=10090 GN=Tmem131 PE=2 SV=2	NA	NA	6	6
Usp5	Ubiquitin carboxyl-terminal hydrolase OS=Mus musculus OX=10090 GN=Usp5 PE=1 SV=1	NA	NA	6	6
Xpnpep3	Xaa-Pro aminopeptidase 3 OS=Mus musculus OX=10090 GN=Xpnpep3 PE=1 SV=1	NA	NA	6	6
Prkaa1	Acetyl-CoA carboxylase kinase OS=Mus musculus OX=10090 GN=Prkaa1 PE=1 SV=1	NA	NA	6	5
Arf6	ADP-ribosylation factor 6 OS=Mus musculus OX=10090 GN=Arf6 PE=1 SV=2	NA	NA	6	5
Arl6ip1	ADP-ribosylation factor-like protein 6-interacting protein 1 OS=Mus musculus OX=10090 GN=Arl6ip1 PE=1 SV=1	NA	NA	5	6
Asns	Asparagine synthetase [glutamine-hydrolyzing] OS=Mus musculus OX=10090 GN=Asns PE=1 SV=3	NA	NA	6	5
Cbr4	Carbonyl reductase family member 4 OS=Mus musculus OX=10090 GN=Cbr4 PE=1 SV=2	NA	NA	6	5
Chmp5	Charged multivesicular body protein 5 OS=Mus musculus OX=10090 GN=Chmp5 PE=1 SV=1	NA	NA	5	6
Ccdc115	Coiled-coil domain-containing protein 115 OS=Mus musculus OX=10090 GN=Ccdc115 PE=1 SV=1	NA	NA	5	6
Ccdc124	Coiled-coil domain-containing protein 124 OS=Mus musculus OX=10090 GN=Ccdc124 PE=1 SV=1	NA	NA	8	3
Cr1l	Complement component receptor 1-like protein OS=Mus musculus OX=10090 GN=Cr1l PE=1 SV=1	NA	NA	5	6
Marchf9	E3 ubiquitin-protein ligase MARCHF9 OS=Mus musculus OX=10090 GN=Marchf9 PE=2 SV=1	NA	NA	8	3
Tmem175	Endosomal/lysosomal potassium channel TMEM175 OS=Mus musculus OX=10090 GN=Tmem175 PE=1 SV=2	NA	NA	6	5
Slc29a3	Equilibrative nucleoside transporter 3 OS=Mus musculus OX=10090 GN=Slc29a3 PE=1 SV=1	NA	NA	6	5
Glt8d1	Glycosyltransferase 8 domain-containing protein 1 OS=Mus musculus OX=10090 GN=Glt8d1 PE=1 SV=1	NA	NA	7	4
Rheb	GTP-binding protein Rheb OS=Mus musculus OX=10090 GN=Rheb PE=1 SV=1	NA	NA	5	6
Ilk	Integrin-linked protein kinase OS=Mus musculus OX=10090 GN=Ilk PE=1 SV=2	NA	NA	5	6
Idh3a	Isocitrate dehydrogenase [NAD] subunit alpha mitochondrial OS=Mus musculus OX=10090 GN=Idh3a PE=1 SV=1	NA	NA	6	5
Rae1	mRNA export factor OS=Mus musculus OX=10090 GN=Rae1 PE=1 SV=1	NA	NA	5	6
Pin1	Peptidyl-prolyl cis-trans isomerase NIMA-interacting 1 OS=Mus musculus OX=10090 GN=Pin1 PE=1 SV=1	NA	NA	5	6
Pdcd2	Programmed cell death protein 2 OS=Mus musculus OX=10090 GN=Pdcd2 PE=1 SV=1	NA	NA	7	4
Zwilch	Protein zwilch homolog OS=Mus musculus OX=10090 GN=Zwilch PE=1 SV=1	NA	NA	7	4
Ppp2r5e	Serine/threonine-protein phosphatase 2A 56 kDa regulatory subunit OS=Mus musculus OX=10090 GN=Ppp2r5e PE=1 SV=1	NA	NA	5	6
Sf3b5	Splicing factor 3B subunit 5 OS=Mus musculus OX=10090 GN=Sf3b5 PE=1 SV=1	NA	NA	5	6
Tfap4	Transcription factor AP4 (Fragment) OS=Mus musculus OX=10090 GN=Tfap4 PE=1 SV=1	NA	NA	7	4
Tmed2	Transmembrane emp24 domain-containing protein 2 OS=Mus musculus OX=10090 GN=Tmed2 PE=1 SV=1	NA	NA	5	6
Tmed3	Transmembrane emp24 domain-containing protein 3 OS=Mus musculus OX=10090 GN=Tmed3 PE=1 SV=1	NA	NA	5	6
Tcirg1	V-type proton ATPase subunit a OS=Mus musculus OX=10090 GN=Tcirg1 PE=1 SV=1	NA	NA	7	4
Mrpl12	39S ribosomal protein L12 mitochondrial OS=Mus musculus OX=10090 GN=Mrpl12 PE=1 SV=2	NA	NA	5	5
Get3	ATPase GET3 OS=Mus musculus OX=10090 GN=Get3 PE=1 SV=2	NA	NA	5	5
Bag1	BAG family molecular chaperone regulator 1 OS=Mus musculus OX=10090 GN=Bag1 PE=1 SV=3	NA	NA	5	5
Clstn1	Calsyntenin-1 OS=Mus musculus OX=10090 GN=Clstn1 PE=1 SV=1	NA	NA	5	5
Cog5	Conserved oligomeric Golgi complex subunit 5 OS=Mus musculus OX=10090 GN=Cog5 PE=1 SV=3	NA	NA	6	4
Nubp2	Cytosolic Fe-S cluster assembly factor NUBP2 OS=Mus musculus OX=10090 GN=Nubp2 PE=1 SV=1	NA	NA	6	4
Dnajc8	DnaJ homolog subfamily C member 8 OS=Mus musculus OX=10090 GN=Dnajc8 PE=1 SV=2	NA	NA	7	3
Dstyk	Dual serine/threonine and tyrosine protein kinase OS=Mus musculus OX=10090 GN=Dstyk PE=1 SV=1	NA	NA	5	5
Exosc9	Exosome complex component RRP45 OS=Mus musculus OX=10090 GN=Exosc9 PE=1 SV=1	NA	NA	6	4
Fbxl17	F-box/LRR-repeat protein 17 OS=Mus musculus OX=10090 GN=Fbxl17 PE=1 SV=3	NA	NA	5	5
Ccnb2	G2/mitotic-specific cyclin-B2 OS=Mus musculus OX=10090 GN=Ccnb2 PE=1 SV=2	NA	NA	4	6
Ghdc	GH3 domain-containing protein OS=Mus musculus OX=10090 GN=Ghdc PE=2 SV=2	NA	NA	6	4
G6pc3	Glucose-6-phosphatase 3 OS=Mus musculus OX=10090 GN=G6pc3 PE=1 SV=1	NA	NA	5	5
Fam20b	Glycosaminoglycan xylosylkinase OS=Mus musculus OX=10090 GN=Fam20b PE=1 SV=1	NA	NA	4	6
Nmt2	Glycylpeptide N-tetradecanoyltransferase OS=Mus musculus OX=10090 GN=Nmt2 PE=1 SV=1	NA	NA	5	5
Tmem120a	Ion channel TACAN OS=Mus musculus OX=10090 GN=Tmem120a PE=1 SV=1	NA	NA	6	4
Lpcat1	Lysophosphatidylcholine acyltransferase 1 OS=Mus musculus OX=10090 GN=Lpcat1 PE=1 SV=1	NA	NA	5	5
Gdpd1	Lysophospholipase D GDPD1 OS=Mus musculus OX=10090 GN=Gdpd1 PE=1 SV=1	NA	NA	5	5
Pex10	Peroxisome biogenesis factor 10 OS=Mus musculus OX=10090 GN=Pex10 PE=2 SV=1	NA	NA	5	5
Pip4p1	Phosphatidylinositol-4 5-bisphosphate 4-phosphatase OS=Mus musculus OX=10090 GN=Pip4p1 PE=1 SV=1	NA	NA	4	6
Gm10320	Predicted pseudogene 10320 OS=Mus musculus OX=10090 GN=Gm10320 PE=3 SV=1	NA	NA	6	4
Sec61b	Protein transport protein Sec61 subunit beta OS=Mus musculus OX=10090 GN=Sec61b PE=1 SV=3	NA	NA	6	4
Stat1	Signal transducer and activator of transcription OS=Mus musculus OX=10090 GN=Stat1 PE=1 SV=1	NA	NA	4	6
Smarcc2	SWI/SNF complex subunit SMARCC2 OS=Mus musculus OX=10090 GN=Smarcc2 PE=1 SV=1	NA	NA	6	4
Stx16	Syntaxin-16 (Fragment) OS=Mus musculus OX=10090 GN=Stx16 PE=1 SV=1	NA	NA	6	4
Tapt1	Transmembrane anterior posterior transformation protein 1 OS=Mus musculus OX=10090 GN=Tapt1 PE=1 SV=2	NA	NA	6	4
Tmem106b	Transmembrane protein 106B (Fragment) OS=Mus musculus OX=10090 GN=Tmem106b PE=1 SV=8	NA	NA	6	4
Usp4	Ubiquitin carboxyl-terminal hydrolase OS=Mus musculus OX=10090 GN=Usp4 PE=1 SV=1	NA	NA	6	4
Use1	Vesicle transport protein USE1 OS=Mus musculus OX=10090 GN=Use1 PE=1 SV=1	NA	NA	5	5
Vamp4	Vesicle-associated membrane protein 4 OS=Mus musculus OX=10090 GN=Vamp4 PE=1 SV=1	NA	NA	5	5
Trim27	Zinc finger protein RFP OS=Mus musculus OX=10090 GN=Trim27 PE=1 SV=2	NA	NA	5	5
Slc39a7	Zinc transporter SLC39A7 OS=Mus musculus OX=10090 GN=Slc39a7 PE=1 SV=2	NA	NA	5	5
Bpnt1	3'(2') 5'-bisphosphate nucleotidase 1 OS=Mus musculus OX=10090 GN=Bpnt1 PE=1 SV=2	NA	NA	4	5
Ebp	3-beta-hydroxysteroid-Delta(8) Delta(7)-isomerase OS=Mus musculus OX=10090 GN=Ebp PE=1 SV=3	NA	NA	5	4
Slc35b2	Adenosine 3'-phospho 5'-phosphosulfate transporter 1 OS=Mus musculus OX=10090 GN=Slc35b2 PE=1 SV=1	NA	NA	5	4
Adgra3	Adhesion G protein-coupled receptor A3 OS=Mus musculus OX=10090 GN=Adgra3 PE=2 SV=3	NA	NA	6	3
Bri3	Brain protein I3 OS=Mus musculus OX=10090 GN=Bri3 PE=1 SV=1	NA	NA	5	4
Clcc1	Chloride channel CLIC-like protein 1 OS=Mus musculus OX=10090 GN=Clcc1 PE=1 SV=1	NA	NA	6	3
Cog1	Conserved oligomeric Golgi complex subunit 1 OS=Mus musculus OX=10090 GN=Cog1 PE=1 SV=3	NA	NA	3	6
Cog7	Conserved oligomeric Golgi complex subunit 7 OS=Mus musculus OX=10090 GN=Cog7 PE=1 SV=1	NA	NA	5	4
Nr2f2	COUP transcription factor 2 OS=Mus musculus OX=10090 GN=Nr2f2 PE=1 SV=2	NA	NA	4	5
Cyb5a	Cytochrome b5 OS=Mus musculus OX=10090 GN=Cyb5a PE=1 SV=1	NA	NA	5	4
Map2k7	Dual specificity mitogen-activated protein kinase kinase 7 OS=Mus musculus OX=10090 GN=Map2k7 PE=1 SV=1	NA	NA	4	5
Man1b1	Endoplasmic reticulum mannosyl-oligosaccharide 1 2-alpha-mannosidase OS=Mus musculus OX=10090 GN=Man1b1 PE=1 SV=1	NA	NA	6	3
Glmp	Glycosylated lysosomal membrane protein OS=Mus musculus OX=10090 GN=Glmp PE=1 SV=1	NA	NA	4	5
Itih3	Inter-alpha-trypsin inhibitor heavy chain H3 OS=Mus musculus OX=10090 GN=Itih3 PE=1 SV=1	NA	NA	3	6
Acadm	Medium-chain specific acyl-CoA dehydrogenase mitochondrial OS=Mus musculus OX=10090 GN=Acadm PE=1 SV=1	NA	NA	3	6
Smad7	Mothers against decapentaplegic homolog 7 OS=Mus musculus OX=10090 GN=Smad7 PE=1 SV=1	NA	NA	4	5
Megf10	Multiple epidermal growth factor-like domains protein 10 OS=Mus musculus OX=10090 GN=Megf10 PE=1 SV=1	NA	NA	5	4
Orc4	Origin recognition complex subunit 4 OS=Mus musculus OX=10090 GN=Orc4 PE=1 SV=2	NA	NA	6	3
P3h2	Prolyl 3-hydroxylase 2 OS=Mus musculus OX=10090 GN=P3h2 PE=1 SV=1	NA	NA	5	4
Msto1	Protein misato homolog 1 OS=Mus musculus OX=10090 GN=Msto1 PE=1 SV=1	NA	NA	5	4
Sco2	Protein SCO2 homolog mitochondrial OS=Mus musculus OX=10090 GN=Sco2 PE=1 SV=1	NA	NA	5	4
Sccpdh	Saccharopine dehydrogenase-like oxidoreductase OS=Mus musculus OX=10090 GN=Sccpdh PE=1 SV=1	NA	NA	5	4
Serpinb6a	Serine (or cysteine) peptidase inhibitor clade B member 6a OS=Mus musculus OX=10090 GN=Serpinb6a PE=1 SV=1	NA	NA	6	3
Serpinb6	Serpin B6 OS=Mus musculus OX=10090 GN=Serpinb6 PE=1 SV=1	NA	NA	6	3
Tmed4	Transmembrane emp24 domain-containing protein 4 OS=Mus musculus OX=10090 GN=Tmed4 PE=1 SV=1	NA	NA	6	3
Tmem109	Transmembrane protein 109 OS=Mus musculus OX=10090 GN=Tmem109 PE=1 SV=2	NA	NA	5	4
Tnfrsf10b	Tumor necrosis factor receptor superfamily member 10B OS=Mus musculus OX=10090 GN=Tnfrsf10b PE=2 SV=3	NA	NA	6	3
Uap1l1	UDP-N-acetylhexosamine pyrophosphorylase-like protein 1 OS=Mus musculus OX=10090 GN=Uap1l1 PE=1 SV=1	NA	NA	5	4
Zfp219	Zfp219 protein OS=Mus musculus OX=10090 GN=Zfp219 PE=1 SV=1	NA	NA	4	5
Zfyve21	Zinc finger FYVE domain-containing protein 21 OS=Mus musculus OX=10090 GN=Zfyve21 PE=1 SV=2	NA	NA	5	4
Znf219	Zinc finger protein 219 OS=Mus musculus OX=10090 GN=Znf219 PE=1 SV=1	NA	NA	4	5
Retsat	All-trans-retinol 13 14-reductase OS=Mus musculus OX=10090 GN=Retsat PE=1 SV=1	NA	NA	3	5
St6galnac4	Alpha-N-acetyl-neuraminyl-2 3-beta-galactosyl-1 3-N-acetyl-galactosaminide alpha-2 6-sialyltransferase OS=Mus musculus OX=10090 GN=St6galnac4 PE=1 SV=1	NA	NA	2	6
Atp5f1d	ATP synthase subunit delta mitochondrial OS=Mus musculus OX=10090 GN=Atp5f1d PE=1 SV=1	NA	NA	3	5
Ntpcr	Cancer-related nucleoside-triphosphatase homolog OS=Mus musculus OX=10090 GN=Ntpcr PE=1 SV=1	NA	NA	3	5
Cisd1	CDGSH iron-sulfur domain-containing protein 1 OS=Mus musculus OX=10090 GN=Cisd1 PE=1 SV=1	NA	NA	4	4
Cdipt	CDP-diacylglycerol--inositol 3-phosphatidyltransferase OS=Mus musculus OX=10090 GN=Cdipt PE=1 SV=1	NA	NA	4	4
Cdca3	Cell division cycle-associated protein 3 OS=Mus musculus OX=10090 GN=Cdca3 PE=1 SV=2	NA	NA	4	4
Chtf18	Chromosome transmission fidelity protein 18 homolog OS=Mus musculus OX=10090 GN=Chtf18 PE=1 SV=2	NA	NA	5	3
Copz1	Coatomer subunit zeta-1 OS=Mus musculus OX=10090 GN=Copz1 PE=1 SV=1	NA	NA	5	3
Polb	DNA polymerase beta OS=Mus musculus OX=10090 GN=Polb PE=1 SV=3	NA	NA	4	4
Hsd17b11	Estradiol 17-beta-dehydrogenase 11 OS=Mus musculus OX=10090 GN=Hsd17b11 PE=1 SV=1	NA	NA	4	4
Eif4h	Eukaryotic translation initiation factor 4H OS=Mus musculus OX=10090 GN=Eif4h PE=1 SV=3	NA	NA	4	4
Exosc5	Exosome complex component RRP46 OS=Mus musculus OX=10090 GN=Exosc5 PE=1 SV=1	NA	NA	5	3
Fzd7	Frizzled-7 OS=Mus musculus OX=10090 GN=Fzd7 PE=1 SV=2	NA	NA	4	4
Gjc3	Gap junction gamma-3 protein OS=Mus musculus OX=10090 GN=Gjc3 PE=1 SV=2	NA	NA	6	2
Gpr143	G-protein coupled receptor 143 OS=Mus musculus OX=10090 GN=Gpr143 PE=2 SV=1	NA	NA	5	3
Gpsm2	G-protein-signaling modulator 2 OS=Mus musculus OX=10090 GN=Gpsm2 PE=1 SV=2	NA	NA	5	3
H13	Histocompatibility 13 (Fragment) OS=Mus musculus OX=10090 GN=H13 PE=1 SV=1	NA	NA	5	3
Impa2	Inositol monophosphatase 2 OS=Mus musculus OX=10090 GN=Impa2 PE=1 SV=1	NA	NA	4	4
Ints5	Integrator complex subunit 5 OS=Mus musculus OX=10090 GN=Ints5 PE=2 SV=1	NA	NA	4	4
Tha1	L-threonine aldolase OS=Mus musculus OX=10090 GN=Tha1 PE=1 SV=1	NA	NA	6	2
Lamp2	Lysosome-associated membrane glycoprotein 2 OS=Mus musculus OX=10090 GN=Lamp2 PE=1 SV=2	NA	NA	4	4
Lyz1	Lysozyme C-1 OS=Mus musculus OX=10090 GN=Lyz1 PE=1 SV=1	NA	NA	3	5
Lyz2	Lysozyme C-2 OS=Mus musculus OX=10090 GN=Lyz2 PE=1 SV=2	NA	NA	3	5
Slc25a51	Mitochondrial nicotinamide adenine dinucleotide transporter SLC25A51 OS=Mus musculus OX=10090 GN=Slc25a51 PE=1 SV=1	NA	NA	3	5
Ncdn	Neurochondrin OS=Mus musculus OX=10090 GN=Ncdn PE=1 SV=1	NA	NA	5	3
Zc3hc1	Nuclear-interacting partner of ALK OS=Mus musculus OX=10090 GN=Zc3hc1 PE=1 SV=1	NA	NA	4	4
Zdhhc9	Palmitoyltransferase ZDHHC9 OS=Mus musculus OX=10090 GN=Zdhhc9 PE=2 SV=1	NA	NA	3	5
Prpf38a	Pre-mRNA-splicing factor 38A OS=Mus musculus OX=10090 GN=Prpf38a PE=1 SV=1	NA	NA	5	3
Osgep	Probable tRNA N6-adenosine threonylcarbamoyltransferase OS=Mus musculus OX=10090 GN=Osgep PE=1 SV=2	NA	NA	4	4
Ptp4a2	Protein tyrosine phosphatase type IVA 2 OS=Mus musculus OX=10090 GN=Ptp4a2 PE=1 SV=1	NA	NA	4	4
Yipf6	Protein YIPF (Fragment) OS=Mus musculus OX=10090 GN=Yipf6 PE=1 SV=1	NA	NA	5	3
Yipf5	Protein YIPF5 OS=Mus musculus OX=10090 GN=Yipf5 PE=1 SV=1	NA	NA	3	5
Ahcyl2	Putative adenosylhomocysteinase 3 OS=Mus musculus OX=10090 GN=Ahcyl2 PE=1 SV=1	NA	NA	4	4
Rrm2	Ribonucleoside-diphosphate reductase subunit M2 OS=Mus musculus OX=10090 GN=Rrm2 PE=1 SV=1	NA	NA	4	4
Rcl1	RNA 3'-terminal phosphate cyclase-like protein OS=Mus musculus OX=10090 GN=Rcl1 PE=1 SV=1	NA	NA	5	3
Ahcyl1	S-adenosylhomocysteine hydrolase-like protein 1 OS=Mus musculus OX=10090 GN=Ahcyl1 PE=1 SV=1	NA	NA	4	4
Ppp2r5d	Serine/threonine-protein phosphatase 2A 56 kDa regulatory subunit OS=Mus musculus OX=10090 GN=Ppp2r5d PE=1 SV=1	NA	NA	3	5
Sigmar1	Sigma non-opioid intracellular receptor 1 OS=Mus musculus OX=10090 GN=Sigmar1 PE=1 SV=1	NA	NA	3	5
Slc9a8	Sodium/hydrogen exchanger OS=Mus musculus OX=10090 GN=Slc9a8 PE=1 SV=1	NA	NA	3	5
Slc23a2	Solute carrier family 23 member 2 OS=Mus musculus OX=10090 GN=Slc23a2 PE=1 SV=2	NA	NA	4	4
Tlr3	Toll-like receptor 3 OS=Mus musculus OX=10090 GN=Tlr3 PE=1 SV=2	NA	NA	5	3
Tpt1	Translationally-controlled tumor protein OS=Mus musculus OX=10090 GN=Tpt1 PE=1 SV=1	NA	NA	4	4
Sec62	Translocation protein SEC62 OS=Mus musculus OX=10090 GN=Sec62 PE=1 SV=1	NA	NA	4	4
Tdrkh	Tudor and KH domain-containing protein OS=Mus musculus OX=10090 GN=Tdrkh PE=1 SV=1	NA	NA	4	4
Mrpl45	39S ribosomal protein L45 mitochondrial OS=Mus musculus OX=10090 GN=Mrpl45 PE=1 SV=1	NA	NA	3	4
Arl6ip6	ADP-ribosylation factor-like protein 6-interacting protein 6 OS=Mus musculus OX=10090 GN=Arl6ip6 PE=1 SV=1	NA	NA	4	3
Atp5mf	ATP synthase subunit f mitochondrial OS=Mus musculus OX=10090 GN=Atp5mf PE=1 SV=3	NA	NA	4	3
Cib1	Calcium and integrin-binding protein 1 OS=Mus musculus OX=10090 GN=Cib1 PE=1 SV=1	NA	NA	2	5
Cnot9	CCR4-NOT transcription complex subunit 9 OS=Mus musculus OX=10090 GN=Cnot9 PE=1 SV=1	NA	NA	4	3
St3gal4	CMP-N-acetylneuraminate-beta-galactosamide-alpha-2 3-sialyltransferase 4 OS=Mus musculus OX=10090 GN=St3gal4 PE=1 SV=1	NA	NA	3	4
Cbwd1	COBW domain-containing protein 1 OS=Mus musculus OX=10090 GN=Cbwd1 PE=1 SV=1	NA	NA	5	2
Ccdc126	Coiled-coil domain-containing protein 126 OS=Mus musculus OX=10090 GN=Ccdc126 PE=2 SV=1	NA	NA	4	3
Cystm1	Cysteine-rich and transmembrane domain-containing protein 1 (Fragment) OS=Mus musculus OX=10090 GN=Cystm1 PE=1 SV=1	NA	NA	4	3
Exosc7	Exosome complex exonuclease RRP42 OS=Mus musculus OX=10090 GN=Exosc7 PE=1 SV=2	NA	NA	4	3
Gnl3l	Guanine nucleotide-binding protein-like 3-like protein OS=Mus musculus OX=10090 GN=Gnl3l PE=1 SV=1	NA	NA	3	4
Hspa13	Heat shock 70 kDa protein 13 OS=Mus musculus OX=10090 GN=Hspa13 PE=1 SV=1	NA	NA	5	2
Hmox1	Heme oxygenase 1 OS=Mus musculus OX=10090 GN=Hmox1 PE=1 SV=1	NA	NA	5	2
Hbb-bs	Hemoglobin beta adult s chain (Fragment) OS=Mus musculus OX=10090 GN=Hbb-bs PE=1 SV=1	NA	NA	3	4
Itga6	Integrin alpha-6 OS=Mus musculus OX=10090 GN=Itga6 PE=1 SV=3	NA	NA	4	3
Ist1	IST1 homolog OS=Mus musculus OX=10090 GN=Ist1 PE=1 SV=1	NA	NA	4	3
Slc7a5	Large neutral amino acids transporter small subunit 1 OS=Mus musculus OX=10090 GN=Slc7a5 PE=1 SV=2	NA	NA	4	3
Mettl7a1	Methyltransferase-like 7A1 (Fragment) OS=Mus musculus OX=10090 GN=Mettl7a1 PE=1 SV=1	NA	NA	4	3
Casd1	N-acetylneuraminate 9-O-acetyltransferase OS=Mus musculus OX=10090 GN=Casd1 PE=2 SV=1	NA	NA	4	3
Ndufs8	NADH dehydrogenase [ubiquinone] iron-sulfur protein 8 mitochondrial OS=Mus musculus OX=10090 GN=Ndufs8 PE=1 SV=1	NA	NA	4	3
Nhlrc3	NHL repeat-containing protein 3 OS=Mus musculus OX=10090 GN=Nhlrc3 PE=1 SV=1	NA	NA	4	3
Plekha1	Pleckstrin homology domain-containing family A member 1 OS=Mus musculus OX=10090 GN=Plekha1 PE=1 SV=2	NA	NA	4	3
Tsr1	Pre-rRNA-processing protein TSR1 homolog OS=Mus musculus OX=10090 GN=Tsr1 PE=1 SV=1	NA	NA	4	3
Saal1	Protein SAAL1 OS=Mus musculus OX=10090 GN=Saal1 PE=1 SV=1	NA	NA	3	4
Yipf3	Protein YIPF3 OS=Mus musculus OX=10090 GN=Yipf3 PE=1 SV=1	NA	NA	4	3
Rraga	Ras-related GTP-binding protein A OS=Mus musculus OX=10090 GN=Rraga PE=1 SV=1	NA	NA	4	3
Rab13	Ras-related protein Rab-13 OS=Mus musculus OX=10090 GN=Rab13 PE=1 SV=1	NA	NA	3	4
Rap1a	Ras-related protein Rap-1A OS=Mus musculus OX=10090 GN=Rap1a PE=1 SV=1	NA	NA	4	3
Rgs19	Regulator of G-protein signaling 19 OS=Mus musculus OX=10090 GN=Rgs19 PE=1 SV=1	NA	NA	3	4
Rhbdd1	Rhomboid-related protein 4 OS=Mus musculus OX=10090 GN=Rhbdd1 PE=1 SV=1	NA	NA	3	4
4933434E20Rik	RIKEN cDNA 4933434E20 gene OS=Mus musculus OX=10090 GN=4933434E20Rik PE=1 SV=1	NA	NA	4	3
Vrk2	Serine/threonine-protein kinase VRK2 OS=Mus musculus OX=10090 GN=Vrk2 PE=1 SV=2	NA	NA	3	4
Snx25	Sorting nexin-25 OS=Mus musculus OX=10090 GN=Snx25 PE=1 SV=1	NA	NA	3	4
Ric8a	Synembryn-A OS=Mus musculus OX=10090 GN=Ric8a PE=1 SV=2	NA	NA	4	3
Ttc37	Tetratricopeptide repeat domain 37 OS=Mus musculus OX=10090 GN=Ttc37 PE=1 SV=1	NA	NA	4	3
Tor2a	Torsin-2A OS=Mus musculus OX=10090 GN=Tor2a PE=1 SV=1	NA	NA	5	2
Tfe3	Transcription factor E3 OS=Mus musculus OX=10090 GN=Tfe3 PE=1 SV=1	NA	NA	3	4
Ssr3	Translocon-associated protein subunit gamma OS=Mus musculus OX=10090 GN=Ssr3 PE=1 SV=1	NA	NA	3	4
Mrpl10	39S ribosomal protein L10 mitochondrial OS=Mus musculus OX=10090 GN=Mrpl10 PE=1 SV=2	NA	NA	3	3
Arl15	ADP-ribosylation factor-like protein 15 OS=Mus musculus OX=10090 GN=Arl15 PE=1 SV=1	NA	NA	3	3
Mgat4b	Alpha-1 3-mannosyl-glycoprotein 4-beta-N-acetylglucosaminyltransferase B OS=Mus musculus OX=10090 GN=Mgat4b PE=2 SV=1	NA	NA	3	3
Atl2	Atlastin-2 OS=Mus musculus OX=10090 GN=Atl2 PE=1 SV=1	NA	NA	3	3
Cldn12	Claudin-12 OS=Mus musculus OX=10090 GN=Cldn12 PE=1 SV=2	NA	NA	3	3
Cops7a	COP9 signalosome complex subunit 7a OS=Mus musculus OX=10090 GN=Cops7a PE=1 SV=2	NA	NA	3	3
Ermp1	Endoplasmic reticulum metallopeptidase 1 OS=Mus musculus OX=10090 GN=Ermp1 PE=1 SV=2	NA	NA	3	3
Selenoi	Ethanolaminephosphotransferase 1 OS=Mus musculus OX=10090 GN=Selenoi PE=2 SV=3	NA	NA	2	4
Exoc2	Exocyst complex component 2 OS=Mus musculus OX=10090 GN=Exoc2 PE=1 SV=1	NA	NA	3	3
Exoc8	Exocyst complex component 8 OS=Mus musculus OX=10090 GN=Exoc8 PE=1 SV=1	NA	NA	3	3
Exosc6	Exosome complex component MTR3 OS=Mus musculus OX=10090 GN=Exosc6 PE=1 SV=1	NA	NA	3	3
Tbrg4	FAST kinase domain-containing protein 4 OS=Mus musculus OX=10090 GN=Tbrg4 PE=1 SV=1	NA	NA	3	3
Gmcl1	Germ cell-less protein-like 1 OS=Mus musculus OX=10090 GN=Gmcl1 PE=1 SV=2	NA	NA	3	3
Hsdl1	Inactive hydroxysteroid dehydrogenase-like protein 1 OS=Mus musculus OX=10090 GN=Hsdl1 PE=1 SV=1	NA	NA	3	3
Itih2	Inter-alpha-trypsin inhibitor heavy chain H2 OS=Mus musculus OX=10090 GN=Itih2 PE=1 SV=1	NA	NA	2	4
Ifnar2	Interferon alpha/beta receptor 2 OS=Mus musculus OX=10090 GN=Ifnar2 PE=1 SV=2	NA	NA	3	3
Lpp	Lipoma-preferred partner homolog OS=Mus musculus OX=10090 GN=Lpp PE=1 SV=1	NA	NA	2	4
Miga2	Mitoguardin 2 OS=Mus musculus OX=10090 GN=Miga2 PE=1 SV=1	NA	NA	4	2
Nup37	Nucleoporin Nup37 OS=Mus musculus OX=10090 GN=Nup37 PE=1 SV=2	NA	NA	4	2
Nup43	Nucleoporin Nup43 OS=Mus musculus OX=10090 GN=Nup43 PE=1 SV=2	NA	NA	3	3
Ormdl3	ORM1-like protein 3 OS=Mus musculus OX=10090 GN=Ormdl3 PE=2 SV=1	NA	NA	3	3
Sparc	Osteonectin OS=Mus musculus OX=10090 GN=Sparc PE=1 SV=1	NA	NA	3	3
Gpr107	Protein GPR107 OS=Mus musculus OX=10090 GN=Gpr107 PE=1 SV=2	NA	NA	3	3
Soga3	Protein SOGA3 OS=Mus musculus OX=10090 GN=Soga3 PE=1 SV=2	NA	NA	3	3
Pcmt1	Protein-L-isoaspartate(D-aspartate) O-methyltransferase OS=Mus musculus OX=10090 GN=Pcmt1 PE=1 SV=3	NA	NA	3	3
Araf	Serine/threonine-protein kinase A-Raf OS=Mus musculus OX=10090 GN=Araf PE=1 SV=2	NA	NA	3	3
Sppl2a	Signal peptide peptidase-like 2A OS=Mus musculus OX=10090 GN=Sppl2a PE=1 SV=2	NA	NA	3	3
Snx2	Sorting nexin-2 OS=Mus musculus OX=10090 GN=Snx2 PE=1 SV=2	NA	NA	4	2
Degs1	Sphingolipid delta(4)-desaturase DES1 OS=Mus musculus OX=10090 GN=Degs1 PE=1 SV=1	NA	NA	4	2
Txn	Thioredoxin OS=Mus musculus OX=10090 GN=Txn PE=1 SV=3	NA	NA	3	3
E2f6	Transcription factor E2F6 OS=Mus musculus OX=10090 GN=E2f6 PE=2 SV=2	NA	NA	2	4
Tmem104	Transmembrane protein 104 OS=Mus musculus OX=10090 GN=Tmem104 PE=1 SV=1	NA	NA	3	3
Zfyve16	Zinc finger FYVE domain-containing protein 16 OS=Mus musculus OX=10090 GN=Zfyve16 PE=1 SV=2	NA	NA	4	2
Agpat3	1-acyl-sn-glycerol-3-phosphate acyltransferase gamma OS=Mus musculus OX=10090 GN=Agpat3 PE=1 SV=2	NA	NA	4	1
Mrps10	28S ribosomal protein S10 mitochondrial OS=Mus musculus OX=10090 GN=Mrps10 PE=1 SV=1	NA	NA	2	3
Coq5	2-methoxy-6-polyprenyl-1 4-benzoquinol methylase mitochondrial OS=Mus musculus OX=10090 GN=Coq5 PE=1 SV=2	NA	NA	2	3
Necap2	Adaptin ear-binding coat-associated protein 2 OS=Mus musculus OX=10090 GN=Necap2 PE=1 SV=1	NA	NA	3	2
Aldh3a2	Aldehyde dehydrogenase family 3 member A2 OS=Mus musculus OX=10090 GN=Aldh3a2 PE=1 SV=2	NA	NA	2	3
Tmbim6	Bax inhibitor 1 (Fragment) OS=Mus musculus OX=10090 GN=Tmbim6 PE=1 SV=1	NA	NA	3	2
Cisd2	CDGSH iron-sulfur domain-containing protein 2 OS=Mus musculus OX=10090 GN=Cisd2 PE=1 SV=1	NA	NA	2	3
Chmp1a	Charged multivesicular body protein 1a OS=Mus musculus OX=10090 GN=Chmp1a PE=1 SV=1	NA	NA	3	2
Ctdnep1	CTD nuclear envelope phosphatase 1 OS=Mus musculus OX=10090 GN=Ctdnep1 PE=1 SV=2	NA	NA	3	2
Cyb561d2	Cytochrome b561 domain-containing protein 2 OS=Mus musculus OX=10090 GN=Cyb561d2 PE=1 SV=1	NA	NA	3	2
Dhrs1	Dehydrogenase/reductase SDR family member 1 OS=Mus musculus OX=10090 GN=Dhrs1 PE=1 SV=1	NA	NA	3	2
Emc2	ER membrane protein complex subunit 2 OS=Mus musculus OX=10090 GN=Emc2 PE=1 SV=1	NA	NA	3	2
Fbxo6	F-box only protein 6 (Fragment) OS=Mus musculus OX=10090 GN=Fbxo6 PE=1 SV=1	NA	NA	3	2
Fbxl2	F-box/LRR-repeat protein 2 OS=Mus musculus OX=10090 GN=Fbxl2 PE=1 SV=1	NA	NA	3	2
Flcn	Folliculin OS=Mus musculus OX=10090 GN=Flcn PE=1 SV=1	NA	NA	3	2
Suv39h1	Histone-lysine N-methyltransferase SUV39H1 OS=Mus musculus OX=10090 GN=Suv39h1 PE=1 SV=1	NA	NA	4	1
Mfsd10	Major facilitator superfamily domain-containing protein 10 OS=Mus musculus OX=10090 GN=Mfsd10 PE=1 SV=1	NA	NA	3	2
Mdh1	Malate dehydrogenase cytoplasmic OS=Mus musculus OX=10090 GN=Mdh1 PE=1 SV=3	NA	NA	1	4
Ndufa12	NADH dehydrogenase [ubiquinone] 1 alpha subcomplex subunit 12 OS=Mus musculus OX=10090 GN=Ndufa12 PE=1 SV=2	NA	NA	2	3
Ndufa6	NADH dehydrogenase [ubiquinone] 1 alpha subcomplex subunit 6 OS=Mus musculus OX=10090 GN=Ndufa6 PE=1 SV=1	NA	NA	4	1
Gpm6a	Neuronal membrane glycoprotein M6-a OS=Mus musculus OX=10090 GN=Gpm6a PE=1 SV=1	NA	NA	2	3
Ppp1r8	Nuclear inhibitor of protein phosphatase 1 OS=Mus musculus OX=10090 GN=Ppp1r8 PE=1 SV=1	NA	NA	3	2
Ppie	Peptidyl-prolyl cis-trans isomerase E OS=Mus musculus OX=10090 GN=Ppie PE=1 SV=2	NA	NA	3	2
Pex11b	Peroxisomal membrane protein 11B OS=Mus musculus OX=10090 GN=Pex11b PE=1 SV=1	NA	NA	3	2
Pik3c3	Phosphatidylinositol 3-kinase catalytic subunit type 3 OS=Mus musculus OX=10090 GN=Pik3c3 PE=1 SV=1	NA	NA	3	2
Pip5k1a	Phosphatidylinositol 4-phosphate 5-kinase type-1 alpha OS=Mus musculus OX=10090 GN=Pip5k1a PE=1 SV=1	NA	NA	2	3
Fig4	Polyphosphoinositide phosphatase OS=Mus musculus OX=10090 GN=Fig4 PE=1 SV=1	NA	NA	2	3
Gm20431	Predicted gene 20431 OS=Mus musculus OX=10090 GN=Gm20431 PE=3 SV=1	NA	NA	2	3
Gm42957	Predicted gene 42957 OS=Mus musculus OX=10090 GN=Gm42957 PE=1 SV=1	NA	NA	3	2
Yipf4	Protein YIPF4 OS=Mus musculus OX=10090 GN=Yipf4 PE=1 SV=1	NA	NA	2	3
Reep5	Receptor expression-enhancing protein OS=Mus musculus OX=10090 GN=Reep5 PE=1 SV=1	NA	NA	4	1
Rmdn3	Regulator of microtubule dynamics protein 3 OS=Mus musculus OX=10090 GN=Rmdn3 PE=1 SV=2	NA	NA	3	2
C330007P06Rik	RIKEN cDNA C330007P06 gene OS=Mus musculus OX=10090 GN=C330007P06Rik PE=1 SV=1	NA	NA	3	2
Shcbp1	SHC SH2 domain-binding protein 1 OS=Mus musculus OX=10090 GN=Shcbp1 PE=1 SV=1	NA	NA	3	2
Stx11	Syntaxin-11 OS=Mus musculus OX=10090 GN=Stx11 PE=1 SV=1	NA	NA	2	3
Telo2	Telomere length regulation protein TEL2 homolog OS=Mus musculus OX=10090 GN=Telo2 PE=1 SV=2	NA	NA	1	4
Txndc15	Thioredoxin domain-containing protein 15 OS=Mus musculus OX=10090 GN=Txndc15 PE=1 SV=1	NA	NA	1	4
Mertk	Tyrosine-protein kinase Mer OS=Mus musculus OX=10090 GN=Mertk PE=1 SV=1	NA	NA	3	2
Usp30	Ubiquitin carboxyl-terminal hydrolase 30 (Fragment) OS=Mus musculus OX=10090 GN=Usp30 PE=1 SV=1	NA	NA	2	3
Ube2v1	Ubiquitin-conjugating enzyme E2 variant 1 OS=Mus musculus OX=10090 GN=Ube2v1 PE=1 SV=1	NA	NA	2	3
Wapl	Wapal protein OS=Mus musculus OX=10090 GN=Wapl PE=1 SV=1	NA	NA	3	2
Zmat2	Zinc finger matrin-type protein 2 OS=Mus musculus OX=10090 GN=Zmat2 PE=2 SV=1	NA	NA	4	1
Serpinc1	Antithrombin-III OS=Mus musculus OX=10090 GN=Serpinc1 PE=1 SV=1	NA	NA	1	3
Atp5me	ATP synthase subunit e mitochondrial OS=Mus musculus OX=10090 GN=Atp5me PE=1 SV=2	NA	NA	2	2
Bag4	BAG family molecular chaperone regulator 4 OS=Mus musculus OX=10090 GN=Bag4 PE=1 SV=2	NA	NA	2	2
Cog3	Conserved oligomeric Golgi complex subunit 3 OS=Mus musculus OX=10090 GN=Cog3 PE=1 SV=3	NA	NA	2	2
Dag1	Dystroglycan OS=Mus musculus OX=10090 GN=Dag1 PE=1 SV=4	NA	NA	2	2
Uhrf2	E3 ubiquitin-protein ligase UHRF2 OS=Mus musculus OX=10090 GN=Uhrf2 PE=1 SV=1	NA	NA	2	2
Entpd7	Ectonucleoside triphosphate diphosphohydrolase 7 OS=Mus musculus OX=10090 GN=Entpd7 PE=1 SV=1	NA	NA	3	1
Eif1	Eukaryotic translation initiation factor 1 OS=Mus musculus OX=10090 GN=Eif1 PE=1 SV=2	NA	NA	2	2
Ercc3	General transcription and DNA repair factor IIH helicase subunit XPB OS=Mus musculus OX=10090 GN=Ercc3 PE=2 SV=1	NA	NA	2	2
Golm1	Golgi membrane protein 1 OS=Mus musculus OX=10090 GN=Golm1 PE=1 SV=2	NA	NA	2	2
Plp1	Myelin proteolipid protein OS=Mus musculus OX=10090 GN=Plp1 PE=1 SV=2	NA	NA	2	2
Ntmt1	N-terminal Xaa-Pro-Lys N-methyltransferase 1 (Fragment) OS=Mus musculus OX=10090 GN=Ntmt1 PE=1 SV=1	NA	NA	2	2
Pigu	Phosphatidylinositol glycan anchor biosynthesis class U protein OS=Mus musculus OX=10090 GN=Pigu PE=1 SV=4	NA	NA	3	1
Pdcd6	Programmed cell death protein 6 OS=Mus musculus OX=10090 GN=Pdcd6 PE=1 SV=2	NA	NA	2	2
Prr14	Proline-rich protein 14 OS=Mus musculus OX=10090 GN=Prr14 PE=1 SV=1	NA	NA	2	2
Gm26938	Proteasome assembly chaperone 3 (Fragment) OS=Mus musculus OX=10090 GN=Gm26938 PE=3 SV=1	NA	NA	3	1
Psmg3	Proteasome assembly chaperone 3 OS=Mus musculus OX=10090 GN=Psmg3 PE=1 SV=1	NA	NA	3	1
Fam177a1	Protein FAM177A1 OS=Mus musculus OX=10090 GN=Fam177a1 PE=1 SV=1	NA	NA	2	2
Spry2	Protein sprouty homolog 2 OS=Mus musculus OX=10090 GN=Spry2 PE=1 SV=1	NA	NA	2	2
Repin1	Replication initiator 1 OS=Mus musculus OX=10090 GN=Repin1 PE=1 SV=1	NA	NA	2	2
Spr	Sepiapterin reductase OS=Mus musculus OX=10090 GN=Spr PE=1 SV=1	NA	NA	2	2
Shc1	SHC-transforming protein 1 OS=Mus musculus OX=10090 GN=Shc1 PE=1 SV=3	NA	NA	2	2
Susd6	Sushi domain-containing protein 6 OS=Mus musculus OX=10090 GN=Susd6 PE=2 SV=1	NA	NA	1	3
Tmed5	Transmembrane emp24 domain-containing protein 5 OS=Mus musculus OX=10090 GN=Tmed5 PE=1 SV=1	NA	NA	3	1
Tsc2	Tuberin OS=Mus musculus OX=10090 GN=Tsc2 PE=1 SV=1	NA	NA	1	3
Tpcn1	Two pore calcium channel protein 1 OS=Mus musculus OX=10090 GN=Tpcn1 PE=1 SV=1	NA	NA	2	2
Znf24	Zinc finger protein 24 OS=Mus musculus OX=10090 GN=Znf24 PE=1 SV=1	NA	NA	2	2
Birc6	Baculoviral IAP repeat-containing protein 6 OS=Mus musculus OX=10090 GN=Birc6 PE=1 SV=1	NA	NA	2	1
Cln6	Ceroid-lipofuscinosis neuronal 6 OS=Mus musculus OX=10090 GN=Cln6 PE=1 SV=1	NA	NA	2	1
Cog4	Component of oligomeric Golgi complex 4 OS=Mus musculus OX=10090 GN=Cog4 PE=1 SV=1	NA	NA	2	1
Krtcap2	Dolichyl-diphosphooligosaccharide--protein glycosyltransferase subunit KCP2 OS=Mus musculus OX=10090 GN=Krtcap2 PE=1 SV=1	NA	NA	1	2
Eef1e1	Eukaryotic translation elongation factor 1 epsilon-1 OS=Mus musculus OX=10090 GN=Eef1e1 PE=1 SV=1	NA	NA	1	2
Ginm1	Glycoprotein integral membrane protein 1 OS=Mus musculus OX=10090 GN=Ginm1 PE=2 SV=1	NA	NA	1	2
Gosr1	Golgi SNAP receptor complex member 1 OS=Mus musculus OX=10090 GN=Gosr1 PE=1 SV=2	NA	NA	2	1
Garre1	Granule-associated Rac and RHOG effector 1 OS=Mus musculus OX=10090 GN=Garre1 PE=1 SV=1	NA	NA	2	1
Map4k4	Mitogen-activated protein kinase kinase kinase kinase 4 OS=Mus musculus OX=10090 GN=Map4k4 PE=1 SV=1	NA	NA	1	2
Farsb	Phenylalanine--tRNA ligase beta subunit OS=Mus musculus OX=10090 GN=Farsb PE=1 SV=2	NA	NA	1	2
Sco1	Protein SCO1 homolog mitochondrial OS=Mus musculus OX=10090 GN=Sco1 PE=1 SV=1	NA	NA	2	1
Rab24	Ras-related protein Rab-24 OS=Mus musculus OX=10090 GN=Rab24 PE=1 SV=2	NA	NA	1	2
B630019K06Rik	RIKEN cDNA B630019K06 gene OS=Mus musculus OX=10090 GN=B630019K06Rik PE=1 SV=1	NA	NA	2	1
Paf1	RNA polymerase II-associated factor 1 homolog OS=Mus musculus OX=10090 GN=Paf1 PE=1 SV=1	NA	NA	1	2
Srm	Spermidine synthase OS=Mus musculus OX=10090 GN=Srm PE=1 SV=1	NA	NA	1	2
Sapcd2	Suppressor APC domain-containing protein 2 OS=Mus musculus OX=10090 GN=Sapcd2 PE=1 SV=1	NA	NA	2	1
Ttn	Titin OS=Mus musculus OX=10090 GN=Ttn PE=1 SV=1	NA	NA	1	2
Ahsa2	Activator of 90 kDa heat shock protein ATPase homolog 2 OS=Mus musculus OX=10090 GN=Ahsa2 PE=1 SV=2	NA	NA	1	1
Atl1	Atlastin-1 OS=Mus musculus OX=10090 GN=Atl1 PE=1 SV=1	NA	NA	1	1
Atp5mc1	ATP synthase F(0) complex subunit C1 mitochondrial OS=Mus musculus OX=10090 GN=Atp5mc1 PE=1 SV=1	NA	NA	1	1
Cept1	Choline/ethanolaminephosphotransferase 1 (Fragment) OS=Mus musculus OX=10090 GN=Cept1 PE=1 SV=1	NA	NA	1	1
Cnksr3	Connector enhancer of kinase suppressor of ras 3 OS=Mus musculus OX=10090 GN=Cnksr3 PE=1 SV=1	NA	NA	1	1
Polr2d	DNA-directed RNA polymerase II subunit RPB4 OS=Mus musculus OX=10090 GN=Polr2d PE=1 SV=1	NA	NA	1	1
Alg3	Dol-P-Man:Man(5)GlcNAc(2)-PP-Dol alpha-1 3-mannosyltransferase OS=Mus musculus OX=10090 GN=Alg3 PE=1 SV=1	NA	NA	1	1
Uso1	General vesicular transport factor p115 OS=Mus musculus OX=10090 GN=Uso1 PE=1 SV=2	NA	NA	1	1
Tvp23b	Golgi apparatus membrane protein TVP23 homolog B OS=Mus musculus OX=10090 GN=Tvp23b PE=1 SV=1	NA	NA	1	1
Hjurp	Holliday junction recognition protein OS=Mus musculus OX=10090 GN=Hjurp PE=1 SV=1	NA	NA	1	1
Mboat2	Lysophospholipid acyltransferase 2 OS=Mus musculus OX=10090 GN=Mboat2 PE=1 SV=1	NA	NA	1	1
Mrgpre	Mas-related G-protein coupled receptor member E OS=Mus musculus OX=10090 GN=Mrgpre PE=2 SV=1	NA	NA	1	1
Syne1	Nesprin-1 OS=Mus musculus OX=10090 GN=Syne1 PE=1 SV=1	NA	NA	1	1
Ogg1	N-glycosylase/DNA lyase OS=Mus musculus OX=10090 GN=Ogg1 PE=1 SV=2	NA	NA	1	1
Nr2c2	Nr2c2 protein OS=Mus musculus OX=10090 GN=Nr2c2 PE=1 SV=1	NA	NA	1	1
Fam219b	Protein FAM219B OS=Mus musculus OX=10090 GN=Fam219b PE=1 SV=1	NA	NA	1	1
Hook3	Protein Hook homolog 3 OS=Mus musculus OX=10090 GN=Hook3 PE=1 SV=2	NA	NA	1	1
Pomk	Protein O-mannose kinase OS=Mus musculus OX=10090 GN=Pomk PE=1 SV=2	NA	NA	1	1
Scly	Selenocysteine lyase (Fragment) OS=Mus musculus OX=10090 GN=Scly PE=1 SV=1	NA	NA	1	1
Slc49a4	Solute carrier family 49 member 4 OS=Mus musculus OX=10090 GN=Slc49a4 PE=1 SV=1	NA	NA	1	1
Sptbn5	Spectrin beta non-erythrocytic 5 OS=Mus musculus OX=10090 GN=Sptbn5 PE=1 SV=1	NA	NA	1	1
Tti1	TELO2-interacting protein 1 homolog OS=Mus musculus OX=10090 GN=Tti1 PE=1 SV=2	NA	NA	1	1
Tns3	Tensin-3 OS=Mus musculus OX=10090 GN=Tns3 PE=1 SV=1	NA	NA	1	1
Tm2d2	TM2 domain-containing protein 2 OS=Mus musculus OX=10090 GN=Tm2d2 PE=2 SV=1	NA	NA	1	1
Trappc5	Trafficking protein particle complex subunit 5 OS=Mus musculus OX=10090 GN=Trappc5 PE=1 SV=1	NA	NA	1	1
Jund	Transcription factor jun-D OS=Mus musculus OX=10090 GN=Jund PE=1 SV=1	NA	NA	1	1
Mterf3	Transcription termination factor 3 mitochondrial OS=Mus musculus OX=10090 GN=Mterf3 PE=2 SV=1	NA	NA	1	1
Tmem143	Transmembrane protein 143 OS=Mus musculus OX=10090 GN=Tmem143 PE=1 SV=1	NA	NA	1	1
Zrsr2	U2 small nuclear ribonucleoprotein auxiliary factor 35 kDa subunit-related protein 2 OS=Mus musculus OX=10090 GN=Zrsr2 PE=1 SV=1	NA	NA	1	1
Vamp5	Vesicle-associated membrane protein 5 OS=Mus musculus OX=10090 GN=Vamp5 PE=1 SV=1	NA	NA	1	1
Slc12a7	Solute carrier family 12 member 7 OS=Mus musculus OX=10090 GN=Slc12a7 PE=1 SV=1	1	NA	179	167
Daam1	Disheveled-associated activator of morphogenesis 1 OS=Mus musculus OX=10090 GN=Daam1 PE=1 SV=4	4	NA	148	144
Ddr2	Discoidin domain-containing receptor 2 OS=Mus musculus OX=10090 GN=Ddr2 PE=1 SV=2	1	NA	141	133
Atp1a1	Sodium/potassium-transporting ATPase subunit alpha-1 OS=Mus musculus OX=10090 GN=Atp1a1 PE=1 SV=1	7	NA	136	145
Sdcbp	Syntenin-1 OS=Mus musculus OX=10090 GN=Sdcbp PE=1 SV=1	5	NA	117	120
Samm50	Sorting and assembly machinery component 50 homolog OS=Mus musculus OX=10090 GN=Samm50 PE=1 SV=1	3	NA	96	109
Tyrp1	5 6-dihydroxyindole-2-carboxylic acid oxidase OS=Mus musculus OX=10090 GN=Tyrp1 PE=1 SV=1	7	NA	99	98
Steap3	Metalloreductase STEAP3 OS=Mus musculus OX=10090 GN=Steap3 PE=1 SV=1	1	NA	75	83
Xpo1	Exportin-1 OS=Mus musculus OX=10090 GN=Xpo1 PE=1 SV=1	2	NA	55	49
Ndfip1	NEDD4 family-interacting protein 1 OS=Mus musculus OX=10090 GN=Ndfip1 PE=1 SV=1	3	NA	57	47
Pgs1	CDP-diacylglycerol--glycerol-3-phosphate 3-phosphatidyltransferase mitochondrial OS=Mus musculus OX=10090 GN=Pgs1 PE=1 SV=1	3	NA	52	49
Dnajc7	DnaJ homolog subfamily C member 7 OS=Mus musculus OX=10090 GN=Dnajc7 PE=1 SV=2	2	NA	45	45
Atp2b1	Plasma membrane calcium-transporting ATPase 1 OS=Mus musculus OX=10090 GN=Atp2b1 PE=1 SV=1	1	NA	45	43
Csnk1g2	Non-specific serine/threonine protein kinase OS=Mus musculus OX=10090 GN=Csnk1g2 PE=1 SV=1	13	NA	57	50
Mlana	Melan-A OS=Mus musculus OX=10090 GN=Mlana PE=2 SV=1	2	NA	41	42
Cct7	T-complex protein 1 subunit eta OS=Mus musculus OX=10090 GN=Cct7 PE=1 SV=1	9	NA	51	44
Fv4	Retrovirus-related Env polyprotein from Fv-4 locus OS=Mus musculus OX=10090 GN=Fv4 PE=1 SV=2	8	NA	42	49
Hspbp1	Hsp70-binding protein 1 OS=Mus musculus OX=10090 GN=Hspbp1 PE=1 SV=1	3	NA	38	34
Ipo7	Importin-7 OS=Mus musculus OX=10090 GN=Ipo7 PE=1 SV=2	1	NA	37	31
Mtx2	Metaxin-2 OS=Mus musculus OX=10090 GN=Mtx2 PE=1 SV=1	10	NA	41	44
Ddost	Dolichyl-diphosphooligosaccharide--protein glycosyltransferase 48 kDa subunit OS=Mus musculus OX=10090 GN=Ddost PE=1 SV=2	7	NA	35	41
Bdh1	D-beta-hydroxybutyrate dehydrogenase mitochondrial OS=Mus musculus OX=10090 GN=Bdh1 PE=1 SV=2	4	NA	33	35
Vdac2	Voltage-dependent anion-selective channel protein 2 OS=Mus musculus OX=10090 GN=Vdac2 PE=1 SV=2	4	NA	35	33
Tamm41	Phosphatidate cytidylyltransferase mitochondrial OS=Mus musculus OX=10090 GN=Tamm41 PE=1 SV=2	3	NA	34	31
Preb	Prolactin regulatory element-binding protein OS=Mus musculus OX=10090 GN=Preb PE=1 SV=1	1	NA	28	32
Slc25a10	Mitochondrial dicarboxylate carrier OS=Mus musculus OX=10090 GN=Slc25a10 PE=1 SV=2	4	NA	33	31
Gna13	Guanine nucleotide-binding protein subunit alpha-13 OS=Mus musculus OX=10090 GN=Gna13 PE=1 SV=1	3	NA	31	30
Nars	Asparagine--tRNA ligase OS=Mus musculus OX=10090 GN=Nars PE=1 SV=1	20	NA	50	43
Lgals9	Galectin OS=Mus musculus OX=10090 GN=Lgals9 PE=1 SV=1	3	NA	28	30
Smurf2	E3 ubiquitin-protein ligase SMURF2 OS=Mus musculus OX=10090 GN=Smurf2 PE=1 SV=1	1	NA	27	24
Npepps	Puromycin-sensitive aminopeptidase OS=Mus musculus OX=10090 GN=Npepps PE=1 SV=2	2	NA	26	26
Atp6v0a2	V-type proton ATPase 116 kDa subunit a2 OS=Mus musculus OX=10090 GN=Atp6v0a2 PE=1 SV=2	1	NA	29	21
Antxr1	Anthrax toxin receptor 1 OS=Mus musculus OX=10090 GN=Antxr1 PE=1 SV=2	6	NA	29	28
Cfl1	Cofilin-1 OS=Mus musculus OX=10090 GN=Cfl1 PE=1 SV=3	36	NA	58	58
Tmx3	Protein disulfide-isomerase TMX3 OS=Mus musculus OX=10090 GN=Tmx3 PE=1 SV=2	3	NA	24	26
Sort1	Sortilin OS=Mus musculus OX=10090 GN=Sort1 PE=1 SV=1	2	NA	22	24
Tomm22	Mitochondrial import receptor subunit TOM22 homolog OS=Mus musculus OX=10090 GN=Tomm22 PE=1 SV=3	3	NA	20	23
Plk1	Serine/threonine-protein kinase PLK1 OS=Mus musculus OX=10090 GN=Plk1 PE=1 SV=2	1	NA	20	19
Aifm1	Apoptosis-inducing factor 1 mitochondrial OS=Mus musculus OX=10090 GN=Aifm1 PE=1 SV=1	4	NA	22	22
Erlin2	Erlin-2 OS=Mus musculus OX=10090 GN=Erlin2 PE=1 SV=1	2	NA	24	16
Ndc1	Nucleoporin NDC1 OS=Mus musculus OX=10090 GN=Ndc1 PE=1 SV=1	2	NA	19	21
Slc16a1	Monocarboxylate transporter 1 OS=Mus musculus OX=10090 GN=Slc16a1 PE=1 SV=1	6	NA	22	24
Gars1	Glycine--tRNA ligase OS=Mus musculus OX=10090 GN=Gars1 PE=1 SV=1	8	NA	24	25
Rab5c	Ras-related protein Rab-5C OS=Mus musculus OX=10090 GN=Rab5c PE=1 SV=2	1	NA	17	18
Vdac1	Voltage-dependent anion-selective channel protein 1 OS=Mus musculus OX=10090 GN=Vdac1 PE=1 SV=3	3	NA	19	20
Gm21992	Predicted gene 21992 OS=Mus musculus OX=10090 GN=Gm21992 PE=4 SV=1	15	NA	30	32
Surf4	Surfeit locus protein 4 OS=Mus musculus OX=10090 GN=Surf4 PE=1 SV=1	1	NA	17	17
Atp6v0a1	V-type proton ATPase subunit a OS=Mus musculus OX=10090 GN=Atp6v0a1 PE=1 SV=1	3	NA	20	17
Atp5pb	ATP synthase F(0) complex subunit B1 mitochondrial OS=Mus musculus OX=10090 GN=Atp5pb PE=1 SV=1	2	NA	19	15
Nup93	Nuclear pore complex protein Nup93 OS=Mus musculus OX=10090 GN=Nup93 PE=1 SV=1	2	NA	18	16
Vdac3	Voltage-dependent anion-selective channel protein 3 OS=Mus musculus OX=10090 GN=Vdac3 PE=1 SV=1	4	NA	18	20
Cul3	Cullin-3 OS=Mus musculus OX=10090 GN=Cul3 PE=1 SV=1	2	NA	18	15
Copb2	Coatomer subunit beta' OS=Mus musculus OX=10090 GN=Copb2 PE=1 SV=2	6	NA	22	18
Palm	Paralemmin-1 OS=Mus musculus OX=10090 GN=Palm PE=1 SV=1	5	NA	20	18
Nipsnap1	Protein NipSnap homolog 1 OS=Mus musculus OX=10090 GN=Nipsnap1 PE=1 SV=1	3	NA	17	17
Pdlim7	PDZ and LIM domain protein 7 OS=Mus musculus OX=10090 GN=Pdlim7 PE=1 SV=1	2	NA	15	15
Dnmt1	DNA (cytosine-5)-methyltransferase 1 OS=Mus musculus OX=10090 GN=Dnmt1 PE=1 SV=5	26	NA	48	29
Qki	Protein quaking OS=Mus musculus OX=10090 GN=Qki PE=1 SV=1	5	NA	19	16
Suclg2	Succinate--CoA ligase [GDP-forming] subunit beta mitochondrial OS=Mus musculus OX=10090 GN=Suclg2 PE=1 SV=3	2	NA	18	11
Vps4b	Vacuolar protein sorting-associated protein 4B OS=Mus musculus OX=10090 GN=Vps4b PE=1 SV=2	8	NA	23	18
Wrnip1	ATPase WRNIP1 OS=Mus musculus OX=10090 GN=Wrnip1 PE=1 SV=2	2	NA	11	17
Tax1bp1	Tax1-binding protein 1 homolog OS=Mus musculus OX=10090 GN=Tax1bp1 PE=1 SV=2	1	NA	15	11
Tmem33	Transmembrane protein 33 OS=Mus musculus OX=10090 GN=Tmem33 PE=1 SV=1	1	NA	15	11
Dnajc11	DnaJ homolog subfamily C member 11 OS=Mus musculus OX=10090 GN=Dnajc11 PE=1 SV=2	1	NA	11	14
Ndufv1	NADH dehydrogenase [ubiquinone] flavoprotein 1 mitochondrial OS=Mus musculus OX=10090 GN=Ndufv1 PE=1 SV=1	1	NA	13	12
Ppa1	Inorganic pyrophosphatase OS=Mus musculus OX=10090 GN=Ppa1 PE=1 SV=1	13	NA	27	21
Srprb	Signal recognition particle receptor subunit beta OS=Mus musculus OX=10090 GN=Srprb PE=1 SV=1	3	NA	13	15
Apob	Apolipoprotein B-100 (Fragment) OS=Mus musculus OX=10090 GN=Apob PE=1 SV=1	1	NA	10	13
Tmtc3	Dolichyl-phosphate-mannose--protein mannosyltransferase OS=Mus musculus OX=10090 GN=Tmtc3 PE=1 SV=1	3	NA	14	13
Golga7	Golgin subfamily A member 7 OS=Mus musculus OX=10090 GN=Golga7 PE=1 SV=1	3	NA	13	14
Pi4ka	Phosphatidylinositol 4-kinase alpha OS=Mus musculus OX=10090 GN=Pi4ka PE=1 SV=2	1	NA	10	13
Dek	Protein DEK OS=Mus musculus OX=10090 GN=Dek PE=1 SV=1	10	NA	24	17
Tdp1	Tyrosyl-DNA phosphodiesterase 1 OS=Mus musculus OX=10090 GN=Tdp1 PE=1 SV=2	3	NA	14	13
Gnb4	Guanine nucleotide-binding protein subunit beta-4 OS=Mus musculus OX=10090 GN=Gnb4 PE=1 SV=4	17	NA	27	27
Pdhb	Pyruvate dehydrogenase E1 component subunit beta mitochondrial OS=Mus musculus OX=10090 GN=Pdhb PE=1 SV=1	4	NA	15	13
Rnh1	Ribonuclease inhibitor OS=Mus musculus OX=10090 GN=Rnh1 PE=1 SV=1	2	NA	14	10
Ptpn1	Tyrosine-protein phosphatase non-receptor type 1 OS=Mus musculus OX=10090 GN=Ptpn1 PE=1 SV=2	1	NA	13	9
Ppib	Peptidyl-prolyl cis-trans isomerase B OS=Mus musculus OX=10090 GN=Ppib PE=1 SV=2	20	NA	40	19
Smc4	Structural maintenance of chromosomes protein 4 OS=Mus musculus OX=10090 GN=Smc4 PE=1 SV=1	5	NA	16	13
Hmbox1	Homeobox-containing protein 1 OS=Mus musculus OX=10090 GN=Hmbox1 PE=1 SV=1	2	NA	11	11
Crip2	Cysteine-rich protein 2 OS=Mus musculus OX=10090 GN=Crip2 PE=1 SV=1	16	NA	24	25
Psme3	Proteasome activator complex subunit 3 OS=Mus musculus OX=10090 GN=Psme3 PE=1 SV=1	2	NA	12	9
Psmb4	Proteasome subunit beta type-4 OS=Mus musculus OX=10090 GN=Psmb4 PE=1 SV=1	5	NA	11	16
Mrpl4	39S ribosomal protein L4 mitochondrial OS=Mus musculus OX=10090 GN=Mrpl4 PE=1 SV=1	1	NA	10	8
Ahsa1	Activator of 90 kDa heat shock protein ATPase homolog 1 OS=Mus musculus OX=10090 GN=Ahsa1 PE=1 SV=2	4	NA	11	12
Fam120c	Constitutive coactivator of PPAR-gamma-like protein 2 OS=Mus musculus OX=10090 GN=Fam120c PE=1 SV=3	6	NA	13	14
Arhgdia	Rho GDP-dissociation inhibitor 1 OS=Mus musculus OX=10090 GN=Arhgdia PE=1 SV=3	5	NA	14	11
Slfn9	Schlafen family member 9 OS=Mus musculus OX=10090 GN=Slfn9 PE=2 SV=1	1	NA	7	10
Pnkp	Bifunctional polynucleotide phosphatase/kinase OS=Mus musculus OX=10090 GN=Pnkp PE=1 SV=2	9	NA	19	13
Dgke	Diacylglycerol kinase epsilon OS=Mus musculus OX=10090 GN=Dgke PE=1 SV=1	1	NA	8	8
Exoc1	Exocyst complex component 1 OS=Mus musculus OX=10090 GN=Exoc1 PE=1 SV=4	1	NA	8	8
Kpna3	Importin subunit alpha-4 OS=Mus musculus OX=10090 GN=Kpna3 PE=1 SV=1	6	NA	13	13
Mapk1	Mitogen-activated protein kinase 1 OS=Mus musculus OX=10090 GN=Mapk1 PE=1 SV=3	4	NA	14	8
Gipc1	PDZ domain-containing protein GIPC1 OS=Mus musculus OX=10090 GN=Gipc1 PE=1 SV=1	8	NA	16	14
Ssr4	Translocon-associated protein subunit delta OS=Mus musculus OX=10090 GN=Ssr4 PE=1 SV=1	4	NA	12	10
Aplf	Aprataxin and PNK-like factor OS=Mus musculus OX=10090 GN=Aplf PE=1 SV=2	1	NA	7	8
Bsg	Basigin (Fragment) OS=Mus musculus OX=10090 GN=Bsg PE=1 SV=1	1	NA	8	7
Exoc4	Exocyst complex component 4 OS=Mus musculus OX=10090 GN=Exoc4 PE=1 SV=2	1	NA	10	5
Psmb2	Proteasome subunit beta type-2 OS=Mus musculus OX=10090 GN=Psmb2 PE=1 SV=1	5	NA	11	12
Dap3	28S ribosomal protein S29 mitochondrial OS=Mus musculus OX=10090 GN=Dap3 PE=1 SV=1	3	NA	8	10
Mrps7	28S ribosomal protein S7 mitochondrial OS=Mus musculus OX=10090 GN=Mrps7 PE=1 SV=1	5	NA	12	10
Rps21	40S ribosomal protein S21 OS=Mus musculus OX=10090 GN=Rps21 PE=1 SV=1	3	NA	9	9
Rplp1	60S acidic ribosomal protein P1 OS=Mus musculus OX=10090 GN=Rplp1 PE=1 SV=1	7	NA	15	11
Mcm7	DNA replication licensing factor MCM7 OS=Mus musculus OX=10090 GN=Mcm7 PE=1 SV=1	3	NA	11	7
Erlin1	Erlin-1 OS=Mus musculus OX=10090 GN=Erlin1 PE=1 SV=2	2	NA	10	6
Max	Protein max OS=Mus musculus OX=10090 GN=Max PE=1 SV=2	6	NA	11	13
Sae1	SUMO-activating enzyme subunit 1 OS=Mus musculus OX=10090 GN=Sae1 PE=1 SV=1	3	NA	10	8
Usp39	U4/U6.U5 tri-snRNP-associated protein 2 OS=Mus musculus OX=10090 GN=Usp39 PE=1 SV=2	11	NA	18	16
Ctsb	Cathepsin B OS=Mus musculus OX=10090 GN=Ctsb PE=1 SV=2	3	NA	6	11
Gpi	Glucose-6-phosphate isomerase OS=Mus musculus OX=10090 GN=Gpi PE=1 SV=4	2	NA	9	6
Glg1	Golgi apparatus protein 1 (Fragment) OS=Mus musculus OX=10090 GN=Glg1 PE=1 SV=1	2	NA	7	8
Hnrnph3	Heterogeneous nuclear ribonucleoprotein H3 OS=Mus musculus OX=10090 GN=Hnrnph3 PE=1 SV=1	1	NA	7	6
Kars1	Lysine--tRNA ligase OS=Mus musculus OX=10090 GN=Kars1 PE=1 SV=1	16	NA	24	19
Metap1	Methionine aminopeptidase 1 OS=Mus musculus OX=10090 GN=Metap1 PE=1 SV=1	7	NA	15	10
Ndufa13	NADH dehydrogenase [ubiquinone] 1 alpha subcomplex subunit 13 OS=Mus musculus OX=10090 GN=Ndufa13 PE=1 SV=3	1	NA	7	6
Psmb6	Proteasome subunit beta type-6 OS=Mus musculus OX=10090 GN=Psmb6 PE=1 SV=3	2	NA	7	8
Rspry1	RING finger and SPRY domain-containing protein 1 OS=Mus musculus OX=10090 GN=Rspry1 PE=1 SV=1	1	NA	9	4
Tarbp2	RISC-loading complex subunit TARBP2 (Fragment) OS=Mus musculus OX=10090 GN=Tarbp2 PE=1 SV=1	3	NA	8	9
Ppp2ca	Serine/threonine-protein phosphatase 2A catalytic subunit alpha isoform OS=Mus musculus OX=10090 GN=Ppp2ca PE=1 SV=1	4	NA	8	11
Pgd	6-phosphogluconate dehydrogenase decarboxylating OS=Mus musculus OX=10090 GN=Pgd PE=1 SV=3	1	NA	7	5
Aimp1	Aminoacyl tRNA synthase complex-interacting multifunctional protein 1 OS=Mus musculus OX=10090 GN=Aimp1 PE=1 SV=2	5	NA	8	12
Armc10	Armadillo repeat-containing protein 10 OS=Mus musculus OX=10090 GN=Armc10 PE=1 SV=1	4	NA	6	12
Eif5a	Eukaryotic translation initiation factor 5A (Fragment) OS=Mus musculus OX=10090 GN=Eif5a PE=1 SV=1	4	NA	11	7
Nipsnap2	Glioblastoma amplified sequence OS=Mus musculus OX=10090 GN=Nipsnap2 PE=1 SV=1	3	NA	9	7
Nob1	RNA-binding protein NOB1 OS=Mus musculus OX=10090 GN=Nob1 PE=1 SV=1	3	NA	7	9
Skp1	S-phase kinase-associated protein 1 OS=Mus musculus OX=10090 GN=Skp1 PE=1 SV=3	7	NA	12	12
Sdf2l1	Stromal cell-derived factor 2-like protein 1 OS=Mus musculus OX=10090 GN=Sdf2l1 PE=1 SV=2	3	NA	5	11
Vps4a	Vacuolar protein sorting-associated protein 4A OS=Mus musculus OX=10090 GN=Vps4a PE=1 SV=1	6	NA	11	11
Nsun5	28S rRNA (cytosine-C(5))-methyltransferase OS=Mus musculus OX=10090 GN=Nsun5 PE=1 SV=2	7	NA	15	8
G6pdx	Glucose-6-phosphate 1-dehydrogenase X OS=Mus musculus OX=10090 GN=G6pdx PE=1 SV=3	4	NA	7	10
Stoml2	Stomatin-like protein 2 mitochondrial OS=Mus musculus OX=10090 GN=Stoml2 PE=1 SV=1	1	NA	6	5
Sdf2	Stromal cell-derived factor 2 OS=Mus musculus OX=10090 GN=Sdf2 PE=1 SV=1	4	NA	6	11
Chaf1a	Chromatin assembly factor 1 subunit A OS=Mus musculus OX=10090 GN=Chaf1a PE=1 SV=1	4	NA	10	6
Hdgf	Hepatoma-derived growth factor OS=Mus musculus OX=10090 GN=Hdgf PE=1 SV=2	2	NA	7	5
Nelfe	Negative elongation factor E OS=Mus musculus OX=10090 GN=Nelfe PE=1 SV=2	3	NA	6	8
Ddx28	Probable ATP-dependent RNA helicase DDX28 OS=Mus musculus OX=10090 GN=Ddx28 PE=2 SV=2	3	NA	6	8
Rasa3	Ras GTPase-activating protein 3 OS=Mus musculus OX=10090 GN=Rasa3 PE=1 SV=2	9	NA	13	13
Shmt2	Serine hydroxymethyltransferase mitochondrial OS=Mus musculus OX=10090 GN=Shmt2 PE=1 SV=1	5	NA	11	7
Pon2	Serum paraoxonase/arylesterase 2 OS=Mus musculus OX=10090 GN=Pon2 PE=1 SV=2	1	NA	5	5
Hacd3	Very-long-chain (3R)-3-hydroxyacyl-CoA dehydratase 3 OS=Mus musculus OX=10090 GN=Hacd3 PE=1 SV=2	4	NA	10	6
Aldh2	Aldehyde dehydrogenase mitochondrial OS=Mus musculus OX=10090 GN=Aldh2 PE=1 SV=1	7	NA	10	11
Ndufaf1	Complex I intermediate-associated protein 30 mitochondrial OS=Mus musculus OX=10090 GN=Ndufaf1 PE=1 SV=2	3	NA	6	7
Polr1c	DNA-directed RNA polymerases I and III subunit RPAC1 (Fragment) OS=Mus musculus OX=10090 GN=Polr1c PE=1 SV=1	1	NA	4	5
Mbnl1	Muscleblind-like protein 1 OS=Mus musculus OX=10090 GN=Mbnl1 PE=1 SV=1	4	NA	6	9
Ndufa8	NADH dehydrogenase [ubiquinone] 1 alpha subcomplex subunit 8 OS=Mus musculus OX=10090 GN=Ndufa8 PE=1 SV=3	10	NA	15	12
Pax3	Paired box protein Pax-3 OS=Mus musculus OX=10090 GN=Pax3 PE=1 SV=2	3	NA	7	6
Ptbp2	Polypyrimidine tract-binding protein 2 OS=Mus musculus OX=10090 GN=Ptbp2 PE=1 SV=2	4	NA	8	7
Smarcb1	SWI/SNF-related matrix-associated actin-dependent regulator of chromatin subfamily B member 1 OS=Mus musculus OX=10090 GN=Smarcb1 PE=1 SV=1	2	NA	7	4
Usp19	Ubiquitin carboxyl-terminal hydrolase 19 OS=Mus musculus OX=10090 GN=Usp19 PE=1 SV=1	1	NA	5	4
Ubp1	Upstream-binding protein 1 OS=Mus musculus OX=10090 GN=Ubp1 PE=1 SV=1	11	NA	15	14
Mrps25	28S ribosomal protein S25 mitochondrial OS=Mus musculus OX=10090 GN=Mrps25 PE=1 SV=1	3	NA	5	7
Mrpl46	39S ribosomal protein L46 mitochondrial OS=Mus musculus OX=10090 GN=Mrpl46 PE=1 SV=1	1	NA	4	4
Tfcp2	Alpha-globin transcription factor CP2 OS=Mus musculus OX=10090 GN=Tfcp2 PE=1 SV=1	4	NA	9	5
Gtpbp1	GTP-binding protein 1 OS=Mus musculus OX=10090 GN=Gtpbp1 PE=1 SV=2	2	NA	5	5
Helz2	Helicase with zinc finger domain 2 OS=Mus musculus OX=10090 GN=Helz2 PE=1 SV=2	3	NA	7	5
Ppih	Peptidyl-prolyl cis-trans isomerase (Fragment) OS=Mus musculus OX=10090 GN=Ppih PE=1 SV=1	5	NA	7	9
Pacsin2	Protein kinase C and casein kinase substrate in neurons protein 2 OS=Mus musculus OX=10090 GN=Pacsin2 PE=1 SV=1	5	NA	11	5
Tcerg1	Transcription elongation regulator 1 OS=Mus musculus OX=10090 GN=Tcerg1 PE=1 SV=2	11	NA	17	11
Trps1	Zinc finger transcription factor Trps1 OS=Mus musculus OX=10090 GN=Trps1 PE=1 SV=1	3	NA	6	6
Mrpl19	39S ribosomal protein L19 mitochondrial OS=Mus musculus OX=10090 GN=Mrpl19 PE=1 SV=1	1	NA	3	4
Tubgcp2	Gamma-tubulin complex component (Fragment) OS=Mus musculus OX=10090 GN=Tubgcp2 PE=1 SV=1	3	NA	7	4
Nmt1	Glycylpeptide N-tetradecanoyltransferase 1 OS=Mus musculus OX=10090 GN=Nmt1 PE=1 SV=1	3	NA	6	5
Pbdc1	Protein PBDC1 OS=Mus musculus OX=10090 GN=Pbdc1 PE=1 SV=1	1	NA	2	5
Srp68	Signal recognition particle subunit SRP68 OS=Mus musculus OX=10090 GN=Srp68 PE=1 SV=1	1	NA	3	4
Uba1	Ubiquitin-like modifier-activating enzyme 1 OS=Mus musculus OX=10090 GN=Uba1 PE=1 SV=1	5	NA	7	8
Acat1	Acetyl-CoA acetyltransferase mitochondrial OS=Mus musculus OX=10090 GN=Acat1 PE=1 SV=1	13	NA	16	14
Atl3	Atlastin-3 OS=Mus musculus OX=10090 GN=Atl3 PE=1 SV=1	1	NA	4	2
Cdk4	Cyclin-dependent kinase 4 OS=Mus musculus OX=10090 GN=Cdk4 PE=1 SV=1	4	NA	7	5
Zfp36l2	mRNA decay activator protein ZFP36L2 OS=Mus musculus OX=10090 GN=Zfp36l2 PE=1 SV=2	2	NA	4	4
Nelfb	Negative elongation factor B OS=Mus musculus OX=10090 GN=Nelfb PE=1 SV=2	1	NA	4	2
Nap1l4	Nucleosome assembly protein 1-like 4 OS=Mus musculus OX=10090 GN=Nap1l4 PE=1 SV=1	9	NA	10	12
Ostc	Oligosaccharyltransferase complex subunit OSTC OS=Mus musculus OX=10090 GN=Ostc PE=1 SV=1	1	NA	3	3
Wdr12	Ribosome biogenesis protein WDR12 OS=Mus musculus OX=10090 GN=Wdr12 PE=1 SV=1	5	NA	7	7
Tmem237	Transmembrane protein 237 (Fragment) OS=Mus musculus OX=10090 GN=Tmem237 PE=1 SV=1	4	NA	6	6
Ambra1	Activating molecule in BECN1-regulated autophagy protein 1 OS=Mus musculus OX=10090 GN=Ambra1 PE=1 SV=1	2	NA	4	3
Ccdc137	Coiled-coil domain-containing protein 137 OS=Mus musculus OX=10090 GN=Ccdc137 PE=2 SV=1	3	NA	5	4
Kif22	Kinesin-like protein KIF22 OS=Mus musculus OX=10090 GN=Kif22 PE=2 SV=2	3	NA	5	4
Mbd3	Methyl-CpG-binding domain protein 3 OS=Mus musculus OX=10090 GN=Mbd3 PE=1 SV=1	4	NA	6	5
Paics	Multifunctional protein ADE2 OS=Mus musculus OX=10090 GN=Paics PE=1 SV=4	5	NA	6	7
Pard3	Pard3 protein OS=Mus musculus OX=10090 GN=Pard3 PE=1 SV=1	1	NA	3	2
Acadsb	Short/branched chain specific acyl-CoA dehydrogenase mitochondrial OS=Mus musculus OX=10090 GN=Acadsb PE=1 SV=1	1	NA	3	2
Sdf4	45 kDa calcium-binding protein OS=Mus musculus OX=10090 GN=Sdf4 PE=1 SV=1	1	NA	2	2
Chd7	Chromodomain-helicase-DNA-binding protein 7 OS=Mus musculus OX=10090 GN=Chd7 PE=1 SV=1	1	NA	2	2
Cyth2	Cytohesin-2 OS=Mus musculus OX=10090 GN=Cyth2 PE=1 SV=1	1	NA	2	2
Ctu1	Cytoplasmic tRNA 2-thiolation protein 1 OS=Mus musculus OX=10090 GN=Ctu1 PE=2 SV=1	1	NA	2	2
Rad51	DNA repair protein RAD51 homolog 1 OS=Mus musculus OX=10090 GN=Rad51 PE=1 SV=1	2	NA	2	4
Nsd2	Histone-lysine N-methyltransferase NSD2 (Fragment) OS=Mus musculus OX=10090 GN=Nsd2 PE=1 SV=1	1	NA	2	2
Kif20a	Kinesin-like protein KIF20A OS=Mus musculus OX=10090 GN=Kif20a PE=1 SV=1	2	NA	4	2
Nme1	Nucleoside diphosphate kinase (Fragment) OS=Mus musculus OX=10090 GN=Nme1 PE=1 SV=1	3	NA	6	2
Gm20390	Nucleoside diphosphate kinase OS=Mus musculus OX=10090 GN=Gm20390 PE=3 SV=1	3	NA	6	2
Pdha1	Pyruvate dehydrogenase E1 component subunit alpha somatic form mitochondrial OS=Mus musculus OX=10090 GN=Pdha1 PE=1 SV=1	2	NA	4	2
Rbm42	RNA-binding motif protein 42 OS=Mus musculus OX=10090 GN=Rbm42 PE=1 SV=1	2	NA	4	2
Rbm8a	RNA-binding protein 8A OS=Mus musculus OX=10090 GN=Rbm8a PE=1 SV=4	12	NA	14	12
Yap1	Transcriptional coactivator YAP1 OS=Mus musculus OX=10090 GN=Yap1 PE=1 SV=2	9	NA	9	11
Znf771	Zinc finger protein 771 OS=Mus musculus OX=10090 GN=Znf771 PE=2 SV=1	1	NA	2	2
Rps28	40S ribosomal protein S28 (Fragment) OS=Mus musculus OX=10090 GN=Rps28 PE=1 SV=1	3	NA	4	3
Cbr3	Carbonyl reductase [NADPH] 3 OS=Mus musculus OX=10090 GN=Cbr3 PE=1 SV=1	1	NA	1	2
Eif3m	Eukaryotic translation initiation factor 3 subunit M OS=Mus musculus OX=10090 GN=Eif3m PE=1 SV=1	8	NA	11	6
Marcksl1	MARCKS-related protein OS=Mus musculus OX=10090 GN=Marcksl1 PE=1 SV=2	1	NA	1	2
Memo1	Protein MEMO1 OS=Mus musculus OX=10090 GN=Memo1 PE=1 SV=1	1	NA	1	2
Srp14	Signal recognition particle 14 kDa protein OS=Mus musculus OX=10090 GN=Srp14 PE=1 SV=1	3	NA	4	3
Srpk2	SRSF protein kinase 2 OS=Mus musculus OX=10090 GN=Srpk2 PE=1 SV=2	5	NA	6	5
Mrps35	28S ribosomal protein S35 mitochondrial OS=Mus musculus OX=10090 GN=Mrps35 PE=1 SV=1	3	NA	4	2
Cmtr1	Cap-specific mRNA (nucleoside-2'-O-)-methyltransferase 1 OS=Mus musculus OX=10090 GN=Cmtr1 PE=1 SV=1	7	NA	8	6
Cdk9	Cyclin-dependent kinase 9 OS=Mus musculus OX=10090 GN=Cdk9 PE=1 SV=1	4	NA	4	4
Ighmbp2	DNA-binding protein SMUBP-2 OS=Mus musculus OX=10090 GN=Ighmbp2 PE=1 SV=1	1	NA	1	1
Naa40	N-alpha-acetyltransferase 40 OS=Mus musculus OX=10090 GN=Naa40 PE=1 SV=1	2	NA	1	3
Pycr2	Pyrroline-5-carboxylate reductase 2 OS=Mus musculus OX=10090 GN=Pycr2 PE=1 SV=1	2	NA	2	2
Ctr9	RNA polymerase-associated protein CTR9 homolog OS=Mus musculus OX=10090 GN=Ctr9 PE=1 SV=2	3	NA	3	3
Ythdf3	YTH domain-containing family protein 3 OS=Mus musculus OX=10090 GN=Ythdf3 PE=1 SV=2	13	NA	14	12
Kin	DNA/RNA-binding protein KIN17 OS=Mus musculus OX=10090 GN=Kin PE=1 SV=1	3	NA	3	2
Raver1	Ribonucleoprotein PTB-binding 1 OS=Mus musculus OX=10090 GN=Raver1 PE=1 SV=2	6	NA	8	3
Tagln2	Transgelin-2 OS=Mus musculus OX=10090 GN=Tagln2 PE=1 SV=4	2	NA	2	1
Cdh2	Cadherin-2 OS=Mus musculus OX=10090 GN=Cdh2 PE=1 SV=2	5	NA	4	4
Dctn2	Dynactin subunit 2 OS=Mus musculus OX=10090 GN=Dctn2 PE=1 SV=3	9	NA	9	7
Rnf2	E3 ubiquitin-protein ligase RING2 OS=Mus musculus OX=10090 GN=Rnf2 PE=1 SV=1	7	NA	6	6
Mcrip2	MAPK-regulated corepressor-interacting protein 2 OS=Mus musculus OX=10090 GN=Mcrip2 PE=1 SV=1	2	NA	1	1
Morf4l1	Mortality factor 4-like protein 1 OS=Mus musculus OX=10090 GN=Morf4l1 PE=1 SV=1	3	NA	3	1
Cnn3	Calponin-3 OS=Mus musculus OX=10090 GN=Cnn3 PE=1 SV=1	11	NA	10	8
Naca	Nascent polypeptide-associated complex subunit alpha muscle-specific form OS=Mus musculus OX=10090 GN=Naca PE=1 SV=2	4	NA	2	2
Nucks1	Nuclear ubiquitous casein and cyclin-dependent kinase substrate 1 OS=Mus musculus OX=10090 GN=Nucks1 PE=1 SV=1	6	NA	6	2
Sf3b6	Splicing factor 3B subunit 6 (Fragment) OS=Mus musculus OX=10090 GN=Sf3b6 PE=1 SV=1	4	NA	1	3
RO60	60 kDa SS-A/Ro ribonucleoprotein OS=Mus musculus OX=10090 GN=RO60 PE=1 SV=1	8	NA	6	5
Fmn1	Formin-1 OS=Mus musculus OX=10090 GN=Fmn1 PE=1 SV=1	6	NA	4	3
Plod3	Multifunctional procollagen lysine hydroxylase and glycosyltransferase LH3 OS=Mus musculus OX=10090 GN=Plod3 PE=1 SV=1	7	NA	5	4
Septin11	Septin-11 OS=Mus musculus OX=10090 GN=Septin11 PE=1 SV=1	4	NA	1	1
Maz	Myc-associated zinc finger protein OS=Mus musculus OX=10090 GN=Maz PE=1 SV=1	8	NA	4	5
Nemf	Nuclear export mediator factor Nemf OS=Mus musculus OX=10090 GN=Nemf PE=1 SV=2	9	NA	5	6
Rbm26	RNA-binding protein 26 OS=Mus musculus OX=10090 GN=Rbm26 PE=1 SV=1	5	NA	1	2
Hdlbp	Vigilin OS=Mus musculus OX=10090 GN=Hdlbp PE=1 SV=1	7	NA	4	2
Actr1a	Alpha-centractin OS=Mus musculus OX=10090 GN=Actr1a PE=1 SV=1	16	NA	12	11
Iqgap1	Ras GTPase-activating-like protein IQGAP1 OS=Mus musculus OX=10090 GN=Iqgap1 PE=1 SV=2	10	NA	8	3
Septin2	Septin-2 OS=Mus musculus OX=10090 GN=Septin2 PE=1 SV=1	8	NA	4	2
Krt72	Keratin type II cytoskeletal 72 OS=Mus musculus OX=10090 GN=Krt72 PE=3 SV=1	28	NA	23	19
Wdr26	WD repeat-containing protein 26 OS=Mus musculus OX=10090 GN=Wdr26 PE=1 SV=1	17	NA	10	5
Krt1	Keratin type II cytoskeletal 1 OS=Mus musculus OX=10090 GN=Krt1 PE=1 SV=4	68	NA	51	51
Krt6a	Keratin type II cytoskeletal 6A OS=Mus musculus OX=10090 GN=Krt6a PE=1 SV=3	92	NA	62	55
Tpm1	Tropomyosin alpha-1 chain OS=Mus musculus OX=10090 GN=Tpm1 PE=1 SV=1	792	NA	511	575
Actb	Actin cytoplasmic 1 OS=Mus musculus OX=10090 GN=Actb PE=1 SV=1	5989	NA	3364	3156
Ptprd	Protein-tyrosine-phosphatase OS=Mus musculus OX=10090 GN=Ptprd PE=1 SV=1	NA	1	136	127
Ptprf	Receptor-type tyrosine-protein phosphatase F OS=Mus musculus OX=10090 GN=Ptprf PE=1 SV=1	NA	1	66	69
Bzw1	Basic leucine zipper and W2 domain-containing protein 1 OS=Mus musculus OX=10090 GN=Bzw1 PE=1 SV=1	NA	1	45	38
Plxna4	Plexin-A4 OS=Mus musculus OX=10090 GN=Plxna4 PE=1 SV=3	NA	1	38	34
Ppp6r1	Serine/threonine-protein phosphatase 6 regulatory subunit 1 OS=Mus musculus OX=10090 GN=Ppp6r1 PE=1 SV=1	NA	1	30	31
Tmed10	Transmembrane emp24 domain-containing protein 10 OS=Mus musculus OX=10090 GN=Tmed10 PE=1 SV=1	NA	1	28	30
Rhox5	Homeobox protein Rhox5 OS=Mus musculus OX=10090 GN=Rhox5 PE=1 SV=1	NA	4	28	25
Ncln	Nicalin OS=Mus musculus OX=10090 GN=Ncln PE=1 SV=1	NA	1	22	24
Arf2	ADP-ribosylation factor 2 OS=Mus musculus OX=10090 GN=Arf2 PE=1 SV=2	NA	2	20	25
Celf2	CUGBP Elav-like family member 2 OS=Mus musculus OX=10090 GN=Celf2 PE=1 SV=1	NA	3	23	24
Tsg101	Tumor susceptibility gene 101 protein OS=Mus musculus OX=10090 GN=Tsg101 PE=1 SV=2	NA	3	25	22
Ehd1	EH domain-containing protein 1 OS=Mus musculus OX=10090 GN=Ehd1 PE=1 SV=1	NA	2	20	22
Qsox2	Sulfhydryl oxidase 2 OS=Mus musculus OX=10090 GN=Qsox2 PE=1 SV=1	NA	1	22	17
Tmed9	Transmembrane emp24 domain-containing protein 9 OS=Mus musculus OX=10090 GN=Tmed9 PE=1 SV=2	NA	1	18	18
Tmem214	Transmembrane protein 214 OS=Mus musculus OX=10090 GN=Tmem214 PE=1 SV=1	NA	3	20	17
Nisch	Nischarin OS=Mus musculus OX=10090 GN=Nisch PE=1 SV=2	NA	3	23	13
Ppp6c	Serine/threonine-protein phosphatase 6 catalytic subunit OS=Mus musculus OX=10090 GN=Ppp6c PE=1 SV=1	NA	1	14	16
Nup205	Nucleoporin 205 OS=Mus musculus OX=10090 GN=Nup205 PE=1 SV=1	NA	11	28	21
Trim32	E3 ubiquitin-protein ligase TRIM32 OS=Mus musculus OX=10090 GN=Trim32 PE=1 SV=2	NA	1	15	13
Ints6	Integrator complex subunit 6 OS=Mus musculus OX=10090 GN=Ints6 PE=1 SV=1	NA	1	13	13
Pigt	GPI transamidase component PIG-T OS=Mus musculus OX=10090 GN=Pigt PE=1 SV=2	NA	1	11	14
Dync1i2	Cytoplasmic dynein 1 intermediate chain 2 OS=Mus musculus OX=10090 GN=Dync1i2 PE=1 SV=1	NA	1	12	12
Stx18	Syntaxin-18 OS=Mus musculus OX=10090 GN=Stx18 PE=1 SV=2	NA	1	11	12
Bzw2	Basic leucine zipper and W2 domain-containing protein 2 OS=Mus musculus OX=10090 GN=Bzw2 PE=1 SV=1	NA	1	12	10
Dbnl	Drebrin-like protein OS=Mus musculus OX=10090 GN=Dbnl PE=1 SV=2	NA	1	14	7
Pds5b	Sister chromatid cohesion protein PDS5 homolog B OS=Mus musculus OX=10090 GN=Pds5b PE=1 SV=1	NA	1	13	8
Zcchc8	Zinc finger CCHC domain-containing protein 8 OS=Mus musculus OX=10090 GN=Zcchc8 PE=1 SV=3	NA	2	12	9
Arl8a	ADP-ribosylation factor-like protein 8A (Fragment) OS=Mus musculus OX=10090 GN=Arl8a PE=1 SV=1	NA	3	11	10
Nudt5	ADP-sugar pyrophosphatase OS=Mus musculus OX=10090 GN=Nudt5 PE=1 SV=1	NA	5	12	13
Wdr74	WD repeat-containing protein 74 OS=Mus musculus OX=10090 GN=Wdr74 PE=2 SV=1	NA	1	9	8
Atp6v0c	V-type proton ATPase proteolipid subunit (Fragment) OS=Mus musculus OX=10090 GN=Atp6v0c PE=1 SV=1	NA	1	8	8
Cap1	Adenylyl cyclase-associated protein 1 OS=Mus musculus OX=10090 GN=Cap1 PE=1 SV=4	NA	2	7	10
Edc4	Enhancer of mRNA-decapping protein 4 OS=Mus musculus OX=10090 GN=Edc4 PE=1 SV=1	NA	12	21	16
Idh3g	Isocitrate dehydrogenase [NAD] subunit gamma 1 mitochondrial OS=Mus musculus OX=10090 GN=Idh3g PE=1 SV=1	NA	2	9	8
Drg1	Developmentally-regulated GTP-binding protein 1 OS=Mus musculus OX=10090 GN=Drg1 PE=1 SV=1	NA	2	10	6
Znf32	Zinc finger protein 32 OS=Mus musculus OX=10090 GN=Znf32 PE=2 SV=1	NA	1	7	7
Hk2	Hexokinase OS=Mus musculus OX=10090 GN=Hk2 PE=1 SV=1	NA	1	8	5
Nup107	Nuclear pore complex protein Nup107 OS=Mus musculus OX=10090 GN=Nup107 PE=1 SV=1	NA	1	5	8
Rbfox2	RNA binding protein fox-1 homolog 2 OS=Mus musculus OX=10090 GN=Rbfox2 PE=1 SV=2	NA	3	9	8
Gm10439	Predicted gene 10439 OS=Mus musculus OX=10090 GN=Gm10439 PE=4 SV=1	NA	19	23	25
Sdhb	Succinate dehydrogenase [ubiquinone] iron-sulfur subunit mitochondrial OS=Mus musculus OX=10090 GN=Sdhb PE=1 SV=1	NA	1	5	7
Cdc123	Cell division cycle protein 123 homolog OS=Mus musculus OX=10090 GN=Cdc123 PE=1 SV=2	NA	1	5	6
Adck1	AarF domain-containing protein kinase 1 OS=Mus musculus OX=10090 GN=Adck1 PE=1 SV=1	NA	1	5	5
Baz1a	Bromodomain adjacent to zinc finger domain protein 1A OS=Mus musculus OX=10090 GN=Baz1a PE=1 SV=1	NA	9	15	11
Mrpl14	39S ribosomal protein L14 mitochondrial OS=Mus musculus OX=10090 GN=Mrpl14 PE=1 SV=1	NA	1	5	4
Mrpl40	39S ribosomal protein L40 mitochondrial OS=Mus musculus OX=10090 GN=Mrpl40 PE=1 SV=1	NA	1	6	3
Plod1	Procollagen-lysine 2-oxoglutarate 5-dioxygenase 1 OS=Mus musculus OX=10090 GN=Plod1 PE=1 SV=1	NA	1	4	5
Ddx19a	ATP-dependent RNA helicase DDX19A OS=Mus musculus OX=10090 GN=Ddx19a PE=1 SV=2	NA	1	4	4
Rpl39	60S ribosomal protein L39 OS=Mus musculus OX=10090 GN=Rpl39 PE=1 SV=2	NA	2	5	4
Atf2	Cyclic AMP-dependent transcription factor ATF-2 OS=Mus musculus OX=10090 GN=Atf2 PE=1 SV=2	NA	2	4	5
Cdc73	Parafibromin OS=Mus musculus OX=10090 GN=Cdc73 PE=1 SV=1	NA	1	4	3
Gak	Cyclin-G-associated kinase OS=Mus musculus OX=10090 GN=Gak PE=1 SV=2	NA	1	3	3
Dlg1	Disks large homolog 1 OS=Mus musculus OX=10090 GN=Dlg1 PE=1 SV=1	NA	2	5	3
Mcrip1	Mapk-regulated corepressor-interacting protein 1 OS=Mus musculus OX=10090 GN=Mcrip1 PE=1 SV=1	NA	2	4	4
Phf14	PHD finger protein 14 OS=Mus musculus OX=10090 GN=Phf14 PE=1 SV=1	NA	1	3	3
Rpl22l1	60S ribosomal protein L22-like 1 OS=Mus musculus OX=10090 GN=Rpl22l1 PE=1 SV=1	NA	11	17	8
Nup153	Nucleoporin 153 OS=Mus musculus OX=10090 GN=Nup153 PE=1 SV=1	NA	2	3	4
Plekha5	Pleckstrin homology domain-containing family A member 5 OS=Mus musculus OX=10090 GN=Plekha5 PE=1 SV=1	NA	5	5	8
Ccny	Cyclin-Y OS=Mus musculus OX=10090 GN=Ccny PE=1 SV=1	NA	3	5	3
Hmg20a	High mobility group protein 20A OS=Mus musculus OX=10090 GN=Hmg20a PE=1 SV=1	NA	3	4	4
Try10	Trypsin 10 OS=Mus musculus OX=10090 GN=Try10 PE=1 SV=1	NA	5	6	6
Nip7	60S ribosome subunit biogenesis protein NIP7 homolog OS=Mus musculus OX=10090 GN=Nip7 PE=1 SV=1	NA	6	5	8
Adnp	Activity-dependent neuroprotector homeobox protein OS=Mus musculus OX=10090 GN=Adnp PE=1 SV=2	NA	3	5	2
Gpatch4	G patch domain-containing protein 4 OS=Mus musculus OX=10090 GN=Gpatch4 PE=1 SV=1	NA	2	2	3
Glmn	Glomulin OS=Mus musculus OX=10090 GN=Glmn PE=1 SV=1	NA	1	1	2
Kri1	Protein KRI1 homolog OS=Mus musculus OX=10090 GN=Kri1 PE=1 SV=3	NA	1	2	1
Nsa2	Ribosome biogenesis protein NSA2 homolog OS=Mus musculus OX=10090 GN=Nsa2 PE=2 SV=1	NA	4	5	4
Secisbp2	SECIS-binding protein 2 OS=Mus musculus OX=10090 GN=Secisbp2 PE=1 SV=1	NA	2	3	2
Anln	Anillin OS=Mus musculus OX=10090 GN=Anln PE=1 SV=2	NA	3	2	4
Senp7	Sentrin-specific protease 7 OS=Mus musculus OX=10090 GN=Senp7 PE=1 SV=1	NA	2	2	1
Mtfr1	Mitochondrial fission regulator 1 OS=Mus musculus OX=10090 GN=Mtfr1 PE=1 SV=1	NA	4	3	3
Phip	PH-interacting protein OS=Mus musculus OX=10090 GN=Phip PE=1 SV=1	NA	6	5	5
Afap1	Actin filament-associated protein 1 (Fragment) OS=Mus musculus OX=10090 GN=Afap1 PE=1 SV=1	NA	7	4	7
Suz12	Polycomb protein Suz12 OS=Mus musculus OX=10090 GN=Suz12 PE=1 SV=2	NA	3	2	1
Nol7	Nucleolar protein 7 OS=Mus musculus OX=10090 GN=Nol7 PE=1 SV=1	NA	5	3	3
Wdr46	WD repeat-containing protein 46 OS=Mus musculus OX=10090 GN=Wdr46 PE=2 SV=1	NA	10	8	8
Prr11	Proline-rich protein 11 OS=Mus musculus OX=10090 GN=Prr11 PE=2 SV=1	NA	6	4	3
Utp14a	U3 small nucleolar RNA-associated protein 14 homolog A OS=Mus musculus OX=10090 GN=Utp14a PE=1 SV=1	NA	11	7	10
Cwf19l2	CWF19-like protein 2 OS=Mus musculus OX=10090 GN=Cwf19l2 PE=1 SV=1	NA	5	2	2
Hmga2	High mobility group protein HMGI-C OS=Mus musculus OX=10090 GN=Hmga2 PE=1 SV=1	NA	15	11	12
Kif23	Kinesin-like protein KIF23 OS=Mus musculus OX=10090 GN=Kif23 PE=1 SV=1	NA	16	10	12
Tbl3	Transducin beta-like protein 3 OS=Mus musculus OX=10090 GN=Tbl3 PE=2 SV=1	NA	17	10	13
Dyrk1a	Dual-specificity kinase OS=Mus musculus OX=10090 GN=Dyrk1a PE=1 SV=1	NA	22	14	13
Dnttip2	Deoxynucleotidyltransferase terminal-interacting protein 2 OS=Mus musculus OX=10090 GN=Dnttip2 PE=1 SV=1	NA	15	4	4
Baz1b	Tyrosine-protein kinase BAZ1B OS=Mus musculus OX=10090 GN=Baz1b PE=1 SV=2	NA	25	13	12
Pdcd11	Protein RRP5 homolog OS=Mus musculus OX=10090 GN=Pdcd11 PE=1 SV=2	NA	29	4	3
Snrpn	Small nuclear ribonucleoprotein-associated protein N OS=Mus musculus OX=10090 GN=Snrpn PE=1 SV=1	NA	73	38	33
Tmem176b	Transmembrane protein 176B OS=Mus musculus OX=10090 GN=Tmem176b PE=1 SV=1	20	13	1803	1818
Actg1	Actin cytoplasmic 2 OS=Mus musculus OX=10090 GN=Actg1 PE=1 SV=1	1392	1555	3356	3139
Hspa8	Heat shock cognate 71 kDa protein OS=Mus musculus OX=10090 GN=Hspa8 PE=1 SV=1	351	245	1726	1728
Plxnb2	Plexin-B2 OS=Mus musculus OX=10090 GN=Plxnb2 PE=1 SV=1	3	2	492	468
Ptprs	Receptor-type tyrosine-protein phosphatase S OS=Mus musculus OX=10090 GN=Ptprs PE=1 SV=1	3	1	456	433
Immt	MICOS complex subunit Mic60 OS=Mus musculus OX=10090 GN=Immt PE=1 SV=1	69	42	494	452
Hspa2	Heat shock-related 70 kDa protein 2 OS=Mus musculus OX=10090 GN=Hspa2 PE=1 SV=2	64	52	389	431
Gapdh	Glyceraldehyde-3-phosphate dehydrogenase OS=Mus musculus OX=10090 GN=Gapdh PE=1 SV=2	184	159	481	489
Gm10358	Glyceraldehyde-3-phosphate dehydrogenase OS=Mus musculus OX=10090 GN=Gm10358 PE=1 SV=1	163	140	446	450
Nono	Non-POU domain-containing octamer-binding protein OS=Mus musculus OX=10090 GN=Nono PE=1 SV=3	259	213	493	514
Sqstm1	Sequestosome-1 OS=Mus musculus OX=10090 GN=Sqstm1 PE=1 SV=1	60	64	309	296
Wwp2	NEDD4-like E3 ubiquitin-protein ligase WWP2 OS=Mus musculus OX=10090 GN=Wwp2 PE=1 SV=1	14	4	252	243
Hspa5	Endoplasmic reticulum chaperone BiP OS=Mus musculus OX=10090 GN=Hspa5 PE=1 SV=3	265	167	419	430
Rps27a	Ubiquitin-40S ribosomal protein S27a OS=Mus musculus OX=10090 GN=Rps27a PE=1 SV=2	69	70	283	258
Sfpq	Splicing factor proline- and glutamine-rich OS=Mus musculus OX=10090 GN=Sfpq PE=1 SV=1	317	325	494	528
Tubb5	Tubulin beta-5 chain OS=Mus musculus OX=10090 GN=Tubb5 PE=1 SV=1	176	136	352	340
Tubb4b	Tubulin beta-4B chain OS=Mus musculus OX=10090 GN=Tubb4b PE=1 SV=1	152	118	324	325
Pabpc1	Polyadenylate-binding protein 1 OS=Mus musculus OX=10090 GN=Pabpc1 PE=1 SV=2	352	301	457	541
Atp2a2	Sarcoplasmic/endoplasmic reticulum calcium ATPase 2 OS=Mus musculus OX=10090 GN=Atp2a2 PE=1 SV=2	15	8	179	179
Syt4	Synaptotagmin-4 OS=Mus musculus OX=10090 GN=Syt4 PE=1 SV=2	7	6	177	170
Tubb2a	Tubulin beta-2A chain OS=Mus musculus OX=10090 GN=Tubb2a PE=1 SV=1	135	106	286	282
Tuba1a	Tubulin alpha-1A chain OS=Mus musculus OX=10090 GN=Tuba1a PE=1 SV=1	122	69	271	246
Tuba1c	Tubulin alpha-1C chain OS=Mus musculus OX=10090 GN=Tuba1c PE=1 SV=1	122	70	261	241
Hspa4	Heat shock 70 kDa protein 4 OS=Mus musculus OX=10090 GN=Hspa4 PE=1 SV=1	22	13	164	154
Tfrc	Transferrin receptor protein 1 OS=Mus musculus OX=10090 GN=Tfrc PE=1 SV=1	15	8	155	140
Hsp90ab1	Heat shock protein HSP 90-beta OS=Mus musculus OX=10090 GN=Hsp90ab1 PE=1 SV=3	91	43	194	196
Kirrel1	Kin of IRRE-like protein 1 OS=Mus musculus OX=10090 GN=Kirrel1 PE=1 SV=1	3	1	125	133
Atp5f1b	ATP synthase subunit beta mitochondrial OS=Mus musculus OX=10090 GN=Atp5f1b PE=1 SV=2	29	14	137	147
Eno1	Alpha-enolase OS=Mus musculus OX=10090 GN=Eno1 PE=1 SV=3	137	70	222	219
Slc25a5	ADP/ATP translocase 2 OS=Mus musculus OX=10090 GN=Slc25a5 PE=1 SV=3	114	109	229	220
Rpn1	Dolichyl-diphosphooligosaccharide--protein glycosyltransferase subunit 1 OS=Mus musculus OX=10090 GN=Rpn1 PE=1 SV=1	29	17	139	133
Tmpo	Lamina-associated polypeptide 2 isoforms alpha/zeta OS=Mus musculus OX=10090 GN=Tmpo PE=1 SV=4	101	73	205	195
Slc25a4	ADP/ATP translocase 1 OS=Mus musculus OX=10090 GN=Slc25a4 PE=1 SV=4	88	69	185	185
Eef1a1	Elongation factor 1-alpha 1 OS=Mus musculus OX=10090 GN=Eef1a1 PE=1 SV=3	147	84	225	215
Tubb3	Tubulin beta-3 chain OS=Mus musculus OX=10090 GN=Tubb3 PE=1 SV=1	93	62	179	177
Eef2	Elongation factor 2 OS=Mus musculus OX=10090 GN=Eef2 PE=1 SV=2	59	34	149	142
Atp5f1a	ATP synthase subunit alpha mitochondrial OS=Mus musculus OX=10090 GN=Atp5f1a PE=1 SV=1	26	15	117	117
Gnai2	Guanine nucleotide-binding protein G(i) subunit alpha-2 OS=Mus musculus OX=10090 GN=Gnai2 PE=1 SV=5	67	41	154	146
Chchd3	MICOS complex subunit Mic19 OS=Mus musculus OX=10090 GN=Chchd3 PE=1 SV=1	15	14	106	107
Upf1	Regulator of nonsense transcripts 1 OS=Mus musculus OX=10090 GN=Upf1 PE=1 SV=2	112	107	194	205
Ddx3x	ATP-dependent RNA helicase DDX3X OS=Mus musculus OX=10090 GN=Ddx3x PE=1 SV=3	210	152	282	257
Gnb2	Guanine nucleotide-binding protein G(I)/G(S)/G(T) subunit beta-2 OS=Mus musculus OX=10090 GN=Gnb2 PE=1 SV=3	56	34	125	131
Hnrnpm	Heterogeneous nuclear ribonucleoprotein M OS=Mus musculus OX=10090 GN=Hnrnpm PE=1 SV=3	140	132	211	219
Gpnmb	Transmembrane glycoprotein NMB OS=Mus musculus OX=10090 GN=Gpnmb PE=1 SV=2	42	33	123	110
Dct	L-dopachrome tautomerase OS=Mus musculus OX=10090 GN=Dct PE=1 SV=2	3	3	75	83
Lmna	Prelamin-A/C OS=Mus musculus OX=10090 GN=Lmna PE=1 SV=2	141	99	206	186
Tubb6	Tubulin beta-6 chain OS=Mus musculus OX=10090 GN=Tubb6 PE=1 SV=1	76	50	138	140
Ptbp1	Polypyrimidine tract-binding protein 1 OS=Mus musculus OX=10090 GN=Ptbp1 PE=1 SV=1	149	129	208	221
Hsph1	Heat shock protein 105 kDa OS=Mus musculus OX=10090 GN=Hsph1 PE=1 SV=2	13	3	82	83
Hnrnpa2b1	Heterogeneous nuclear ribonucleoproteins A2/B1 OS=Mus musculus OX=10090 GN=Hnrnpa2b1 PE=1 SV=2	386	276	401	404
Cltc	Clathrin heavy chain 1 OS=Mus musculus OX=10090 GN=Cltc PE=1 SV=3	196	144	253	229
Atxn2l	Ataxin-2-like protein OS=Mus musculus OX=10090 GN=Atxn2l PE=1 SV=1	81	149	184	187
Eprs1	Bifunctional glutamate/proline--tRNA ligase OS=Mus musculus OX=10090 GN=Eprs1 PE=1 SV=4	30	19	101	88
Top2a	DNA topoisomerase 2-alpha OS=Mus musculus OX=10090 GN=Top2a PE=1 SV=2	42	44	119	105
Ddx5	DEAD box protein 5 OS=Mus musculus OX=10090 GN=Ddx5 PE=1 SV=1	272	241	320	326
Hnrnpu	Heterogeneous nuclear ribonucleoprotein U OS=Mus musculus OX=10090 GN=Hnrnpu PE=1 SV=1	225	150	248	258
Gnb1	Guanine nucleotide-binding protein G(I)/G(S)/G(T) subunit beta-1 OS=Mus musculus OX=10090 GN=Gnb1 PE=1 SV=3	52	33	109	105
Hnrnpl	Heterogeneous nuclear ribonucleoprotein L (Fragment) OS=Mus musculus OX=10090 GN=Hnrnpl PE=1 SV=1	159	138	193	233
Gnas	Guanine nucleotide-binding protein G(s) subunit alpha isoforms XLas OS=Mus musculus OX=10090 GN=Gnas PE=1 SV=1	27	17	89	83
Atp6v1a	V-type proton ATPase catalytic subunit A OS=Mus musculus OX=10090 GN=Atp6v1a PE=1 SV=2	14	2	75	69
Phgdh	D-3-phosphoglycerate dehydrogenase OS=Mus musculus OX=10090 GN=Phgdh PE=1 SV=3	5	2	68	64
Dnaja1	DnaJ homolog subfamily A member 1 OS=Mus musculus OX=10090 GN=Dnaja1 PE=1 SV=1	35	13	91	82
Xpo5	Exportin-5 OS=Mus musculus OX=10090 GN=Xpo5 PE=1 SV=1	12	6	72	71
Ipo5	Importin-5 OS=Mus musculus OX=10090 GN=Ipo5 PE=1 SV=3	3	3	63	68
Nedd4	E3 ubiquitin-protein ligase NEDD4 OS=Mus musculus OX=10090 GN=Nedd4 PE=1 SV=3	13	6	72	71
Hspa9	Stress-70 protein mitochondrial OS=Mus musculus OX=10090 GN=Hspa9 PE=1 SV=3	117	71	154	158
Rps3	40S ribosomal protein S3 OS=Mus musculus OX=10090 GN=Rps3 PE=1 SV=1	88	55	134	132
Syncrip	Heterogeneous nuclear ribonucleoprotein Q OS=Mus musculus OX=10090 GN=Syncrip PE=1 SV=2	108	62	146	147
Ppia	Peptidyl-prolyl cis-trans isomerase A OS=Mus musculus OX=10090 GN=Ppia PE=1 SV=2	15	11	72	75
G3bp1	Ras GTPase-activating protein-binding protein 1 OS=Mus musculus OX=10090 GN=G3bp1 PE=1 SV=1	249	257	305	322
Tom1	Target of Myb protein 1 OS=Mus musculus OX=10090 GN=Tom1 PE=1 SV=1	18	7	73	72
Gnai3	Guanine nucleotide-binding protein G(i) subunit alpha-3 OS=Mus musculus OX=10090 GN=Gnai3 PE=1 SV=3	52	32	106	97
Yes1	Tyrosine-protein kinase Yes OS=Mus musculus OX=10090 GN=Yes1 PE=1 SV=3	28	13	76	84
Cct8	T-complex protein 1 subunit theta OS=Mus musculus OX=10090 GN=Cct8 PE=1 SV=3	11	3	68	64
Ybx3	Y-box-binding protein 3 OS=Mus musculus OX=10090 GN=Ybx3 PE=1 SV=2	153	92	173	190
Canx	Calnexin OS=Mus musculus OX=10090 GN=Canx PE=1 SV=1	6	1	62	61
Nufip2	Nuclear fragile X mental retardation-interacting protein 2 OS=Mus musculus OX=10090 GN=Nufip2 PE=1 SV=1	39	88	117	126
Pkp4	Plakophilin-4 OS=Mus musculus OX=10090 GN=Pkp4 PE=1 SV=1	9	10	64	71
Dhx9	RNA helicase OS=Mus musculus OX=10090 GN=Dhx9 PE=1 SV=1	141	149	210	196
Csnk1g3	Casein kinase I isoform gamma-3 OS=Mus musculus OX=10090 GN=Csnk1g3 PE=1 SV=2	15	5	73	60
Elavl1	ELAV-like protein 1 OS=Mus musculus OX=10090 GN=Elavl1 PE=1 SV=2	86	59	118	140
Fyn	Tyrosine-protein kinase Fyn OS=Mus musculus OX=10090 GN=Fyn PE=1 SV=4	22	11	76	70
Pabpc4	Polyadenylate-binding protein OS=Mus musculus OX=10090 GN=Pabpc4 PE=1 SV=1	151	127	174	216
Gna11	Guanine nucleotide-binding protein subunit alpha-11 OS=Mus musculus OX=10090 GN=Gna11 PE=1 SV=1	15	8	67	65
Rps5	40S ribosomal protein S5 OS=Mus musculus OX=10090 GN=Rps5 PE=1 SV=1	38	27	88	85
Slc25a13	Calcium-binding mitochondrial carrier protein Aralar2 OS=Mus musculus OX=10090 GN=Slc25a13 PE=1 SV=1	31	18	82	75
Dnaja2	DnaJ homolog subfamily A member 2 OS=Mus musculus OX=10090 GN=Dnaja2 PE=1 SV=1	23	8	74	65
Cct3	T-complex protein 1 subunit gamma OS=Mus musculus OX=10090 GN=Cct3 PE=1 SV=1	26	13	79	67
Ddx6	Probable ATP-dependent RNA helicase DDX6 OS=Mus musculus OX=10090 GN=Ddx6 PE=1 SV=1	143	92	175	166
Pcna	Proliferating cell nuclear antigen OS=Mus musculus OX=10090 GN=Pcna PE=1 SV=2	15	2	62	61
FAM120A	Constitutive coactivator of PPAR-gamma-like protein 1 OS=Mus musculus OX=10090 GN=FAM120A PE=1 SV=2	112	107	149	175
Farsa	Phenylalanine--tRNA ligase OS=Mus musculus OX=10090 GN=Farsa PE=1 SV=1	12	9	63	63
Hnrnpk	Heterogeneous nuclear ribonucleoprotein K OS=Mus musculus OX=10090 GN=Hnrnpk PE=1 SV=1	140	106	183	167
Tcp1	T-complex protein 1 subunit alpha OS=Mus musculus OX=10090 GN=Tcp1 PE=1 SV=3	58	28	102	88
Psmc3	26S proteasome regulatory subunit 6A OS=Mus musculus OX=10090 GN=Psmc3 PE=1 SV=2	44	18	82	82
Mib1	E3 ubiquitin-protein ligase MIB1 OS=Mus musculus OX=10090 GN=Mib1 PE=1 SV=1	4	2	59	49
	MLV-related proviral Env polyprotein OS=Mus musculus OX=10090 PE=1 SV=3	12	9	57	63
Hsp90aa1	Heat shock protein HSP 90-alpha OS=Mus musculus OX=10090 GN=Hsp90aa1 PE=1 SV=4	53	24	86	86
Lyn	Tyrosine-protein kinase Lyn OS=Mus musculus OX=10090 GN=Lyn PE=1 SV=4	36	11	74	68
Matr3	Matrin-3 OS=Mus musculus OX=10090 GN=Matr3 PE=1 SV=1	99	107	141	158
Rps18	40S ribosomal protein S18 OS=Mus musculus OX=10090 GN=Rps18 PE=1 SV=3	56	63	103	108
Rps18-ps6	40S ribosomal protein S18 OS=Mus musculus OX=10090 GN=Rps18-ps6 PE=3 SV=2	56	63	103	108
Copa	Coatomer subunit alpha OS=Mus musculus OX=10090 GN=Copa PE=1 SV=2	14	7	56	57
Pmel	Melanocyte protein PMEL OS=Mus musculus OX=10090 GN=Pmel PE=2 SV=1	6	4	47	55
Hadha	Trifunctional enzyme subunit alpha mitochondrial OS=Mus musculus OX=10090 GN=Hadha PE=1 SV=1	43	28	89	73
Cand1	Cullin-associated NEDD8-dissociated protein 1 OS=Mus musculus OX=10090 GN=Cand1 PE=1 SV=2	3	2	50	44
Ctnnb1	Catenin beta-1 OS=Mus musculus OX=10090 GN=Ctnnb1 PE=1 SV=1	20	19	60	67
Rbm14	RNA-binding protein 14 OS=Mus musculus OX=10090 GN=Rbm14 PE=1 SV=1	48	76	109	103
Sorbs3	Sorbs3 protein OS=Mus musculus OX=10090 GN=Sorbs3 PE=1 SV=1	7	10	54	51
Cse1l	Exportin-2 OS=Mus musculus OX=10090 GN=Cse1l PE=1 SV=1	3	1	43	47
Gfpt1	Glutamine--fructose-6-phosphate aminotransferase [isomerizing] 1 OS=Mus musculus OX=10090 GN=Gfpt1 PE=1 SV=3	6	4	54	41
Safb	Scaffold attachment factor B1 OS=Mus musculus OX=10090 GN=Safb PE=1 SV=2	52	42	87	91
Ddx21	Nucleolar RNA helicase 2 OS=Mus musculus OX=10090 GN=Ddx21 PE=1 SV=3	40	34	73	83
Hnrnpab	Heterogeneous nuclear ribonucleoprotein A/B OS=Mus musculus OX=10090 GN=Hnrnpab PE=1 SV=1	104	79	129	135
Hnrnpc	Heterogeneous nuclear ribonucleoproteins C1/C2 OS=Mus musculus OX=10090 GN=Hnrnpc PE=1 SV=1	71	51	94	106
Ctnna1	Catenin alpha-1 OS=Mus musculus OX=10090 GN=Ctnna1 PE=1 SV=1	34	17	69	59
Rpa1	Replication protein A 70 kDa DNA-binding subunit OS=Mus musculus OX=10090 GN=Rpa1 PE=1 SV=1	43	33	77	76
Mov10	RNA helicase OS=Mus musculus OX=10090 GN=Mov10 PE=1 SV=1	23	25	59	66
Vat1	Synaptic vesicle membrane protein VAT-1 homolog OS=Mus musculus OX=10090 GN=Vat1 PE=1 SV=3	3	2	40	42
Ass1	Argininosuccinate synthase OS=Mus musculus OX=10090 GN=Ass1 PE=1 SV=1	11	6	49	43
Rab38	Ras-related protein Rab-38 OS=Mus musculus OX=10090 GN=Rab38 PE=1 SV=1	6	4	39	46
Slc25a12	Calcium-binding mitochondrial carrier protein Aralar1 OS=Mus musculus OX=10090 GN=Slc25a12 PE=1 SV=1	23	11	48	60
Snd1	Staphylococcal nuclease domain-containing protein 1 OS=Mus musculus OX=10090 GN=Snd1 PE=1 SV=1	28	5	65	42
Gcn1	eIF-2-alpha kinase activator GCN1 OS=Mus musculus OX=10090 GN=Gcn1 PE=1 SV=1	7	4	48	35
Hnrnpd	Heterogeneous nuclear ribonucleoprotein D0 OS=Mus musculus OX=10090 GN=Hnrnpd PE=1 SV=2	71	54	100	97
Slc25a3	Phosphate carrier protein mitochondrial OS=Mus musculus OX=10090 GN=Slc25a3 PE=1 SV=1	15	9	46	50
Atp6v1b2	V-type proton ATPase subunit B brain isoform OS=Mus musculus OX=10090 GN=Atp6v1b2 PE=1 SV=1	9	1	41	41
Uqcrc2	Cytochrome b-c1 complex subunit 2 mitochondrial OS=Mus musculus OX=10090 GN=Uqcrc2 PE=1 SV=1	18	12	52	49
Ipo9	Importin-9 OS=Mus musculus OX=10090 GN=Ipo9 PE=1 SV=1	6	7	45	39
Psmd11	26S proteasome non-ATPase regulatory subunit 11 OS=Mus musculus OX=10090 GN=Psmd11 PE=1 SV=3	39	19	63	65
Psmc6	26S proteasome regulatory subunit 10B OS=Mus musculus OX=10090 GN=Psmc6 PE=1 SV=1	50	30	76	74
Fubp3	Far upstream element (FUSE)-binding protein 3 OS=Mus musculus OX=10090 GN=Fubp3 PE=1 SV=1	20	12	49	53
Hnrnpr	Heterogeneous nuclear ribonucleoprotein R OS=Mus musculus OX=10090 GN=Hnrnpr PE=1 SV=1	28	17	54	61
Ilf2	Interleukin enhancer-binding factor 2 OS=Mus musculus OX=10090 GN=Ilf2 PE=1 SV=1	31	21	59	63
Msn	Moesin OS=Mus musculus OX=10090 GN=Msn PE=1 SV=3	27	8	60	45
Flot2	Flotillin-2 OS=Mus musculus OX=10090 GN=Flot2 PE=1 SV=2	9	4	40	42
Hadhb	Trifunctional enzyme subunit beta mitochondrial OS=Mus musculus OX=10090 GN=Hadhb PE=1 SV=1	16	7	55	37
Galk1	Galactokinase OS=Mus musculus OX=10090 GN=Galk1 PE=1 SV=2	8	4	40	40
Gnaq	Guanine nucleotide-binding protein G(q) subunit alpha OS=Mus musculus OX=10090 GN=Gnaq PE=1 SV=4	11	5	43	41
Pcbp1	Poly(rC)-binding protein 1 OS=Mus musculus OX=10090 GN=Pcbp1 PE=1 SV=1	19	2	48	41
Rps14	40S ribosomal protein S14 OS=Mus musculus OX=10090 GN=Rps14 PE=1 SV=3	37	24	62	66
Pspc1	Paraspeckle component 1 OS=Mus musculus OX=10090 GN=Pspc1 PE=1 SV=1	47	22	61	75
Cct4	T-complex protein 1 subunit delta OS=Mus musculus OX=10090 GN=Cct4 PE=1 SV=3	13	7	45	42
Ap2a1	AP-2 complex subunit alpha-1 OS=Mus musculus OX=10090 GN=Ap2a1 PE=1 SV=1	47	20	74	59
Cand2	Cullin-associated NEDD8-dissociated protein 2 OS=Mus musculus OX=10090 GN=Cand2 PE=1 SV=2	4	2	36	36
Cdk17	Cyclin-dependent kinase 17 OS=Mus musculus OX=10090 GN=Cdk17 PE=1 SV=2	3	1	36	34
Vangl1	Vang-like protein 1 OS=Mus musculus OX=10090 GN=Vangl1 PE=1 SV=2	4	2	39	33
Psmd1	26S proteasome non-ATPase regulatory subunit 1 OS=Mus musculus OX=10090 GN=Psmd1 PE=1 SV=1	79	33	89	88
Rps4x	40S ribosomal protein S4 X isoform OS=Mus musculus OX=10090 GN=Rps4x PE=1 SV=2	163	164	202	190
Rpl13a	60S ribosomal protein L13a OS=Mus musculus OX=10090 GN=Rpl13a PE=1 SV=4	29	16	57	53
Fxr1	Fragile X mental retardation syndrome-related protein 1 OS=Mus musculus OX=10090 GN=Fxr1 PE=1 SV=2	75	84	112	112
Hsd17b12	Very-long-chain 3-oxoacyl-CoA reductase OS=Mus musculus OX=10090 GN=Hsd17b12 PE=1 SV=1	12	12	44	44
Lig3	DNA ligase OS=Mus musculus OX=10090 GN=Lig3 PE=1 SV=1	17	18	53	45
Pgk1	Phosphoglycerate kinase 1 OS=Mus musculus OX=10090 GN=Pgk1 PE=1 SV=4	12	11	47	39
Sfxn1	Sideroflexin-1 OS=Mus musculus OX=10090 GN=Sfxn1 PE=1 SV=3	3	1	37	30
Cdk1	Cyclin-dependent kinase 1 OS=Mus musculus OX=10090 GN=Cdk1 PE=1 SV=3	15	10	42	45
Mogs	Mannosyl-oligosaccharide glucosidase OS=Mus musculus OX=10090 GN=Mogs PE=1 SV=1	22	9	50	43
Slc25a11	Mitochondrial 2-oxoglutarate/malate carrier protein OS=Mus musculus OX=10090 GN=Slc25a11 PE=1 SV=3	11	6	40	39
G3bp2	Ras GTPase-activating protein-binding protein 2 OS=Mus musculus OX=10090 GN=G3bp2 PE=1 SV=2	48	85	94	101
Abcb7	ATP-binding cassette sub-family B member 7 mitochondrial OS=Mus musculus OX=10090 GN=Abcb7 PE=1 SV=3	9	3	44	29
Ndufa9	NADH dehydrogenase [ubiquinone] 1 alpha subcomplex subunit 9 mitochondrial OS=Mus musculus OX=10090 GN=Ndufa9 PE=1 SV=1	5	5	33	38
Gart	Trifunctional purine biosynthetic protein adenosine-3 OS=Mus musculus OX=10090 GN=Gart PE=1 SV=3	32	8	49	51
Abcd3	ATP-binding cassette sub-family D member 3 OS=Mus musculus OX=10090 GN=Abcd3 PE=1 SV=2	15	10	51	33
Cep55	Centrosomal protein of 55 kDa OS=Mus musculus OX=10090 GN=Cep55 PE=1 SV=2	7	6	42	30
Ubtd1	Ubiquitin domain-containing protein 1 OS=Mus musculus OX=10090 GN=Ubtd1 PE=2 SV=1	9	2	35	35
Psmc2	26S proteasome regulatory subunit 7 OS=Mus musculus OX=10090 GN=Psmc2 PE=1 SV=5	43	23	65	59
P4hb	Protein disulfide-isomerase OS=Mus musculus OX=10090 GN=P4hb PE=1 SV=2	24	9	46	45
Tollip	Toll-interacting protein OS=Mus musculus OX=10090 GN=Tollip PE=1 SV=1	4	3	29	36
Ybx1	Y-box-binding protein 1 OS=Mus musculus OX=10090 GN=Ybx1 PE=1 SV=3	235	149	204	238
Copb1	Coatomer subunit beta OS=Mus musculus OX=10090 GN=Copb1 PE=1 SV=1	15	5	37	40
NARS1	Asparagine--tRNA ligase cytoplasmic OS=Mus musculus OX=10090 GN=NARS1 PE=1 SV=2	20	17	50	43
Kpna2	Importin subunit alpha-1 OS=Mus musculus OX=10090 GN=Kpna2 PE=1 SV=2	16	8	42	38
Rack1	Receptor of activated protein C kinase 1 OS=Mus musculus OX=10090 GN=Rack1 PE=1 SV=3	40	16	58	54
Cbx3	Cbx3 protein OS=Mus musculus OX=10090 GN=Cbx3 PE=1 SV=1	37	16	57	51
Igf2bp3	Insulin-like growth factor 2 mRNA-binding protein 3 OS=Mus musculus OX=10090 GN=Igf2bp3 PE=1 SV=1	55	44	69	85
Snrpa	U1 small nuclear ribonucleoprotein A OS=Mus musculus OX=10090 GN=Snrpa PE=1 SV=3	19	5	39	39
Psmd12	26S proteasome non-ATPase regulatory subunit 12 OS=Mus musculus OX=10090 GN=Psmd12 PE=1 SV=4	37	28	58	60
Psmc1	26S proteasome regulatory subunit 4 OS=Mus musculus OX=10090 GN=Psmc1 PE=1 SV=1	64	21	71	67
Psmc4	26S proteasome regulatory subunit 6B OS=Mus musculus OX=10090 GN=Psmc4 PE=1 SV=2	70	29	80	72
Rps12	40S ribosomal protein S12 OS=Mus musculus OX=10090 GN=Rps12 PE=1 SV=1	15	14	45	37
Rps16	40S ribosomal protein S16 OS=Mus musculus OX=10090 GN=Rps16 PE=1 SV=4	32	47	65	67
Hspd1	60 kDa heat shock protein mitochondrial OS=Mus musculus OX=10090 GN=Hspd1 PE=1 SV=1	44	33	67	63
Atxn10	Ataxin-10 OS=Mus musculus OX=10090 GN=Atxn10 PE=1 SV=2	21	13	47	40
Cdk2	Cyclin-dependent kinase 2 OS=Mus musculus OX=10090 GN=Cdk2 PE=1 SV=2	4	3	28	32
Dnaja3	DnaJ homolog subfamily A member 3 mitochondrial OS=Mus musculus OX=10090 GN=Dnaja3 PE=1 SV=1	12	6	34	37
Limch1	LIM and calponin homology domains-containing protein 1 OS=Mus musculus OX=10090 GN=Limch1 PE=1 SV=1	76	46	91	84
Mlf2	Myeloid leukemia factor 2 OS=Mus musculus OX=10090 GN=Mlf2 PE=1 SV=1	6	7	31	35
Fmr1	Synaptic functional regulator FMR1 OS=Mus musculus OX=10090 GN=Fmr1 PE=1 SV=1	62	88	99	104
Rpl23	60S ribosomal protein L23 OS=Mus musculus OX=10090 GN=Rpl23 PE=1 SV=1	49	50	75	76
Cbx1	Chromobox protein homolog 1 OS=Mus musculus OX=10090 GN=Cbx1 PE=1 SV=1	33	7	50	42
Frs2	Fibroblast growth factor receptor substrate 2 OS=Mus musculus OX=10090 GN=Frs2 PE=1 SV=3	7	6	30	35
Fxr2	Fragile X mental retardation syndrome-related protein 2 OS=Mus musculus OX=10090 GN=Fxr2 PE=1 SV=1	47	74	87	86
Hnrnpdl	Heterogeneous nuclear ribonucleoprotein D-like OS=Mus musculus OX=10090 GN=Hnrnpdl PE=1 SV=1	58	28	69	69
Eftud2	116 kDa U5 small nuclear ribonucleoprotein component OS=Mus musculus OX=10090 GN=Eftud2 PE=1 SV=1	46	36	72	61
Ctps1	CTP synthase 1 OS=Mus musculus OX=10090 GN=Ctps1 PE=1 SV=2	6	3	28	32
Cul1	Cullin-1 OS=Mus musculus OX=10090 GN=Cul1 PE=1 SV=1	15	4	35	35
Cyc1	Cytochrome c1 heme protein mitochondrial OS=Mus musculus OX=10090 GN=Cyc1 PE=1 SV=1	19	6	39	37
Trip12	E3 ubiquitin-protein ligase TRIP12 OS=Mus musculus OX=10090 GN=Trip12 PE=1 SV=1	24	17	49	43
Eif2ak2	Interferon-induced double-stranded RNA-activated protein kinase OS=Mus musculus OX=10090 GN=Eif2ak2 PE=1 SV=2	25	25	49	52
Pa2g4	Proliferation-associated protein 2G4 OS=Mus musculus OX=10090 GN=Pa2g4 PE=1 SV=3	29	11	56	35
Sgpl1	Sphingosine-1-phosphate lyase 1 OS=Mus musculus OX=10090 GN=Sgpl1 PE=1 SV=1	9	16	36	40
Arf4	ADP-ribosylation factor 4 OS=Mus musculus OX=10090 GN=Arf4 PE=1 SV=2	3	2	25	30
Kpnb1	Importin subunit beta-1 OS=Mus musculus OX=10090 GN=Kpnb1 PE=1 SV=2	17	11	36	42
Psmb1	Proteasome subunit beta type-1 OS=Mus musculus OX=10090 GN=Psmb1 PE=1 SV=1	13	4	34	33
Efr3a	Protein EFR3 homolog A OS=Mus musculus OX=10090 GN=Efr3a PE=1 SV=1	25	13	44	44
Rps8	40S ribosomal protein S8 OS=Mus musculus OX=10090 GN=Rps8 PE=1 SV=2	94	71	101	113
Lmnb1	Lamin-B1 OS=Mus musculus OX=10090 GN=Lmnb1 PE=1 SV=3	51	37	70	67
Lmnb2	Lamin-B2 OS=Mus musculus OX=10090 GN=Lmnb2 PE=1 SV=2	30	16	51	44
Sptlc2	Serine palmitoyltransferase 2 OS=Mus musculus OX=10090 GN=Sptlc2 PE=1 SV=2	4	6	29	30
Vangl2	Vang-like protein 2 OS=Mus musculus OX=10090 GN=Vangl2 PE=1 SV=3	4	2	29	26
Psmd3	26S proteasome non-ATPase regulatory subunit 3 OS=Mus musculus OX=10090 GN=Psmd3 PE=1 SV=3	66	39	76	77
Bag2	BAG family molecular chaperone regulator 2 OS=Mus musculus OX=10090 GN=Bag2 PE=1 SV=1	4	4	27	29
Ktn1	Kinectin OS=Mus musculus OX=10090 GN=Ktn1 PE=1 SV=1	25	13	49	37
Rpl26	60S ribosomal protein L26 OS=Mus musculus OX=10090 GN=Rpl26 PE=1 SV=1	82	62	89	102
Arcn1	Coatomer subunit delta OS=Mus musculus OX=10090 GN=Arcn1 PE=1 SV=2	9	4	29	31
Eif4a1	Eukaryotic initiation factor 4A-I OS=Mus musculus OX=10090 GN=Eif4a1 PE=1 SV=1	71	38	87	69
H1-4	Histone H1.4 OS=Mus musculus OX=10090 GN=H1-4 PE=1 SV=2	88	96	110	121
Ubap2l	Ubiquitin-associated protein 2-like OS=Mus musculus OX=10090 GN=Ubap2l PE=1 SV=1	31	13	54	37
Naglu	Alpha-N-acetylglucosaminidase OS=Mus musculus OX=10090 GN=Naglu PE=1 SV=1	4	2	29	23
Top1	DNA topoisomerase 1 OS=Mus musculus OX=10090 GN=Top1 PE=1 SV=2	42	36	64	60
Rdx	Radixin OS=Mus musculus OX=10090 GN=Rdx PE=1 SV=1	11	3	36	24
Smarca5	SWI/SNF-related matrix-associated actin-dependent regulator of chromatin subfamily A member 5 OS=Mus musculus OX=10090 GN=Smarca5 PE=1 SV=1	35	57	80	58
Cct5	T-complex protein 1 subunit epsilon OS=Mus musculus OX=10090 GN=Cct5 PE=1 SV=1	22	10	38	40
Rps6	40S ribosomal protein S6 OS=Mus musculus OX=10090 GN=Rps6 PE=1 SV=1	80	96	105	116
Atad3	ATPase family AAA domain-containing protein 3 OS=Mus musculus OX=10090 GN=Atad3 PE=1 SV=1	12	21	38	40
Abcf2	ATP-binding cassette sub-family F member 2 OS=Mus musculus OX=10090 GN=Abcf2 PE=1 SV=1	26	14	44	41
Pdcd6ip	Programmed cell death 6-interacting protein OS=Mus musculus OX=10090 GN=Pdcd6ip PE=1 SV=3	2	1	25	23
Ppp2r1a	Serine/threonine-protein phosphatase 2A 65 kDa regulatory subunit A alpha isoform OS=Mus musculus OX=10090 GN=Ppp2r1a PE=1 SV=3	17	14	36	40
Psmd13	26S proteasome non-ATPase regulatory subunit 13 OS=Mus musculus OX=10090 GN=Psmd13 PE=1 SV=1	30	13	45	42
Rpl21	60S ribosomal protein L21 OS=Mus musculus OX=10090 GN=Rpl21 PE=1 SV=1	34	20	49	49
Arf1	ADP-ribosylation factor 1 OS=Mus musculus OX=10090 GN=Arf1 PE=1 SV=2	7	2	25	28
Arf3	ADP-ribosylation factor 3 OS=Mus musculus OX=10090 GN=Arf3 PE=2 SV=2	7	2	25	28
Atp5po	ATP synthase subunit O mitochondrial OS=Mus musculus OX=10090 GN=Atp5po PE=1 SV=1	5	1	24	26
Abce1	ATP-binding cassette sub-family E member 1 OS=Mus musculus OX=10090 GN=Abce1 PE=1 SV=1	19	11	36	38
Xrcc1	DNA repair protein XRCC1 OS=Mus musculus OX=10090 GN=Xrcc1 PE=1 SV=2	22	11	40	37
Hsp90b1	Endoplasmin OS=Mus musculus OX=10090 GN=Hsp90b1 PE=1 SV=2	18	4	33	33
Idh3b	Isocitrate dehydrogenase [NAD] subunit mitochondrial OS=Mus musculus OX=10090 GN=Idh3b PE=1 SV=1	14	11	33	36
Mtch2	Mitochondrial carrier homolog 2 OS=Mus musculus OX=10090 GN=Mtch2 PE=1 SV=1	7	2	22	31
Cct6a	T-complex protein 1 subunit zeta OS=Mus musculus OX=10090 GN=Cct6a PE=1 SV=3	13	5	31	31
Psmd2	26S proteasome non-ATPase regulatory subunit 2 OS=Mus musculus OX=10090 GN=Psmd2 PE=1 SV=1	92	49	100	84
Psmc5	26S proteasome regulatory subunit 8 OS=Mus musculus OX=10090 GN=Psmc5 PE=1 SV=1	52	30	65	60
Rpl12	60S ribosomal protein L12 OS=Mus musculus OX=10090 GN=Rpl12 PE=1 SV=2	34	10	45	42
Ddb1	DNA damage-binding protein 1 OS=Mus musculus OX=10090 GN=Ddb1 PE=1 SV=2	43	27	57	56
Ncoa5	Nuclear receptor coactivator 5 OS=Mus musculus OX=10090 GN=Ncoa5 PE=1 SV=1	32	32	56	51
Safb2	Scaffold attachment factor B2 OS=Mus musculus OX=10090 GN=Safb2 PE=1 SV=2	34	28	53	52
Rps17	40S ribosomal protein S17 OS=Mus musculus OX=10090 GN=Rps17 PE=1 SV=2	55	43	71	69
Dnajc13	DnaJ heat shock protein family (Hsp40) member C13 OS=Mus musculus OX=10090 GN=Dnajc13 PE=1 SV=1	84	86	116	96
H1-3	Histone H1.3 OS=Mus musculus OX=10090 GN=H1-3 PE=1 SV=2	83	122	120	127
Nsun2	RNA cytosine C(5)-methyltransferase NSUN2 OS=Mus musculus OX=10090 GN=Nsun2 PE=1 SV=2	21	9	39	33
U2af2	U2 snRNP auxiliary factor large subunit OS=Mus musculus OX=10090 GN=U2af2 PE=1 SV=1	53	24	60	59
Yme1l1	ATP-dependent zinc metalloprotease YME1L1 OS=Mus musculus OX=10090 GN=Yme1l1 PE=1 SV=1	5	1	25	22
Ppp1r9b	Neurabin-2 OS=Mus musculus OX=10090 GN=Ppp1r9b PE=1 SV=1	94	93	112	116
Ptbp3	Polypyrimidine tract-binding protein 3 OS=Mus musculus OX=10090 GN=Ptbp3 PE=1 SV=1	19	18	31	47
Rtcb	RNA-splicing ligase RtcB homolog OS=Mus musculus OX=10090 GN=Rtcb PE=1 SV=1	91	123	127	128
Xrcc5	X-ray repair cross-complementing protein 5 OS=Mus musculus OX=10090 GN=Xrcc5 PE=1 SV=4	15	17	39	34
Rps19	40S ribosomal protein S19 OS=Mus musculus OX=10090 GN=Rps19 PE=1 SV=3	33	39	58	54
Arf5	ADP-ribosylation factor 5 OS=Mus musculus OX=10090 GN=Arf5 PE=1 SV=2	3	2	20	25
Ap2a2	AP-2 complex subunit alpha-2 OS=Mus musculus OX=10090 GN=Ap2a2 PE=1 SV=2	39	19	54	44
Ftl1	Ferritin OS=Mus musculus OX=10090 GN=Ftl1 PE=1 SV=1	9	13	28	34
Flot1	Flotillin-1 OS=Mus musculus OX=10090 GN=Flot1 PE=1 SV=1	21	10	37	34
Hnrnpul2	Heterogeneous nuclear ribonucleoprotein U-like protein 2 OS=Mus musculus OX=10090 GN=Hnrnpul2 PE=1 SV=2	12	6	29	29
Igf2bp1	Insulin-like growth factor 2 mRNA-binding protein 1 OS=Mus musculus OX=10090 GN=Igf2bp1 PE=1 SV=1	18	14	36	36
Csnk1a1	Casein kinase I isoform alpha OS=Mus musculus OX=10090 GN=Csnk1a1 PE=1 SV=1	10	8	28	29
Iap	IgE-binding protein OS=Mus musculus OX=10090 GN=Iap PE=2 SV=1	171	231	223	218
Ubtf	Nucleolar transcription factor 1 OS=Mus musculus OX=10090 GN=Ubtf PE=1 SV=1	24	19	48	34
Prpf19	Pre-mRNA-processing factor 19 OS=Mus musculus OX=10090 GN=Prpf19 PE=1 SV=1	32	25	49	47
Sec61a1	Protein transport protein Sec61 subunit alpha isoform 1 OS=Mus musculus OX=10090 GN=Sec61a1 PE=1 SV=2	3	2	25	19
Csde1	Cold shock domain-containing protein E1 OS=Mus musculus OX=10090 GN=Csde1 PE=1 SV=1	39	19	45	51
Mlph	Melanophilin OS=Mus musculus OX=10090 GN=Mlph PE=1 SV=1	30	47	56	59
Prodh	Proline dehydrogenase 1 mitochondrial OS=Mus musculus OX=10090 GN=Prodh PE=1 SV=2	5	2	20	25
Upf2	Regulator of nonsense transcripts 2 OS=Mus musculus OX=10090 GN=Upf2 PE=1 SV=1	10	8	33	23
Raly	RNA-binding protein Raly (Fragment) OS=Mus musculus OX=10090 GN=Raly PE=1 SV=1	56	47	68	73
Rps27	40S ribosomal protein S27 OS=Mus musculus OX=10090 GN=Rps27 PE=1 SV=3	13	12	34	28
Maoa	Amine oxidase [flavin-containing] A OS=Mus musculus OX=10090 GN=Maoa PE=1 SV=3	3	2	19	23
Ctdsp1	Carboxy-terminal domain RNA polymerase II polypeptide A small phosphatase 1 OS=Mus musculus OX=10090 GN=Ctdsp1 PE=1 SV=1	1	1	19	20
Dnajb6	DnaJ homolog subfamily B member 6 OS=Mus musculus OX=10090 GN=Dnajb6 PE=1 SV=4	7	3	23	24
Rpn2	Dolichyl-diphosphooligosaccharide--protein glycosyltransferase subunit 2 OS=Mus musculus OX=10090 GN=Rpn2 PE=1 SV=1	11	3	28	23
Npm1	Nucleophosmin OS=Mus musculus OX=10090 GN=Npm1 PE=1 SV=1	106	77	117	103
Psma2	Proteasome subunit alpha type-2 OS=Mus musculus OX=10090 GN=Psma2 PE=1 SV=3	10	4	23	28
Fam98a	Protein FAM98A OS=Mus musculus OX=10090 GN=Fam98a PE=1 SV=1	36	47	62	58
Pum3	Pumilio homolog 3 OS=Mus musculus OX=10090 GN=Pum3 PE=1 SV=2	20	28	40	45
Rsl1d1	Ribosomal L1 domain-containing protein 1 OS=Mus musculus OX=10090 GN=Rsl1d1 PE=1 SV=1	31	36	48	56
Dhx36	ATP-dependent DNA/RNA helicase DHX36 OS=Mus musculus OX=10090 GN=Dhx36 PE=1 SV=2	43	34	57	56
Copg1	Coatomer subunit gamma-1 OS=Mus musculus OX=10090 GN=Copg1 PE=1 SV=1	6	1	17	26
Ncapd2	Condensin complex subunit 1 OS=Mus musculus OX=10090 GN=Ncapd2 PE=1 SV=1	10	4	24	26
Dync1h1	Cytoplasmic dynein 1 heavy chain 1 OS=Mus musculus OX=10090 GN=Dync1h1 PE=1 SV=2	3	1	21	19
Rcn2	Reticulocalbin-2 OS=Mus musculus OX=10090 GN=Rcn2 PE=1 SV=1	12	3	26	25
Rbm3	RNA-binding protein 3 OS=Mus musculus OX=10090 GN=Rbm3 PE=1 SV=1	45	26	58	49
Atp5f1c	ATP synthase subunit gamma mitochondrial OS=Mus musculus OX=10090 GN=Atp5f1c PE=1 SV=1	7	7	26	23
Atp5c1	ATP synthase subunit gamma OS=Mus musculus OX=10090 GN=Atp5c1 PE=1 SV=1	7	7	26	23
Specc1l	Cytospin-A OS=Mus musculus OX=10090 GN=Specc1l PE=1 SV=1	62	164	128	133
Top2b	DNA topoisomerase 2-beta OS=Mus musculus OX=10090 GN=Top2b PE=1 SV=2	13	30	43	35
Gemin5	Gem-associated protein 5 OS=Mus musculus OX=10090 GN=Gemin5 PE=1 SV=2	26	22	46	37
H1-2	Histone H1.2 OS=Mus musculus OX=10090 GN=H1-2 PE=1 SV=2	103	132	134	136
Pdlim5	PDZ and LIM domain protein 5 OS=Mus musculus OX=10090 GN=Pdlim5 PE=1 SV=4	14	4	25	28
Ddx17	Probable ATP-dependent RNA helicase DDX17 OS=Mus musculus OX=10090 GN=Ddx17 PE=1 SV=1	141	117	156	137
Psma3	Proteasome subunit alpha type-3 OS=Mus musculus OX=10090 GN=Psma3 PE=1 SV=3	6	2	22	21
Rp2	Protein XRP2 OS=Mus musculus OX=10090 GN=Rp2 PE=1 SV=3	13	1	28	21
Lactb	Serine beta-lactamase-like protein LACTB mitochondrial OS=Mus musculus OX=10090 GN=Lactb PE=1 SV=1	19	8	31	31
Zc3hav1	Zinc finger CCCH-type antiviral protein 1 OS=Mus musculus OX=10090 GN=Zc3hav1 PE=1 SV=1	27	17	43	36
Xrn2	5'-3' exoribonuclease 2 OS=Mus musculus OX=10090 GN=Xrn2 PE=1 SV=1	54	30	58	60
Csnk1d	Casein kinase I isoform delta OS=Mus musculus OX=10090 GN=Csnk1d PE=1 SV=2	13	12	31	28
Cbx5	Chromobox protein homolog 5 OS=Mus musculus OX=10090 GN=Cbx5 PE=1 SV=1	17	12	36	27
Ap2m1	AP-2 complex subunit mu OS=Mus musculus OX=10090 GN=Ap2m1 PE=1 SV=1	34	19	43	43
Xrcc6	ATP-dependent DNA helicase 2 subunit 1 OS=Mus musculus OX=10090 GN=Xrcc6 PE=1 SV=1	26	25	45	39
Gng12	Guanine nucleotide-binding protein G(I)/G(S)/G(O) subunit gamma-12 OS=Mus musculus OX=10090 GN=Gng12 PE=1 SV=3	5	2	21	19
Ncbp3	Nuclear cap-binding protein subunit 3 OS=Mus musculus OX=10090 GN=Ncbp3 PE=1 SV=1	6	2	21	20
Psma7	Proteasome subunit alpha type-7 OS=Mus musculus OX=10090 GN=Psma7 PE=1 SV=1	10	4	26	21
Ap2b1	AP-2 complex subunit beta OS=Mus musculus OX=10090 GN=Ap2b1 PE=1 SV=1	59	41	66	66
Znf326	DBIRD complex subunit ZNF326 OS=Mus musculus OX=10090 GN=Znf326 PE=1 SV=1	20	14	30	36
Mcm3	DNA replication licensing factor MCM3 OS=Mus musculus OX=10090 GN=Mcm3 PE=1 SV=2	13	5	27	23
Dnajc10	DnaJ homolog subfamily C member 10 OS=Mus musculus OX=10090 GN=Dnajc10 PE=1 SV=2	43	19	49	45
Gnao1	Guanine nucleotide-binding protein G(o) subunit alpha OS=Mus musculus OX=10090 GN=Gnao1 PE=1 SV=3	22	9	33	30
Rhot1	Mitochondrial Rho GTPase 1 OS=Mus musculus OX=10090 GN=Rhot1 PE=1 SV=1	4	2	21	17
Psma6	Proteasome subunit alpha type-6 OS=Mus musculus OX=10090 GN=Psma6 PE=1 SV=1	14	7	26	27
Zfp326	Zinc finger protein 326 OS=Mus musculus OX=10090 GN=Zfp326 PE=1 SV=1	20	14	30	36
Psmd14	26S proteasome non-ATPase regulatory subunit 14 OS=Mus musculus OX=10090 GN=Psmd14 PE=1 SV=2	26	7	32	32
Rpl10	60S ribosomal protein L10 OS=Mus musculus OX=10090 GN=Rpl10 PE=1 SV=3	75	91	97	100
Rars1	Arginine--tRNA ligase cytoplasmic OS=Mus musculus OX=10090 GN=Rars1 PE=1 SV=2	10	1	20	22
Cul4a	Cullin-4A OS=Mus musculus OX=10090 GN=Cul4a PE=1 SV=1	5	5	21	20
Hax1	HCLS1-associated protein X-1 OS=Mus musculus OX=10090 GN=Hax1 PE=1 SV=1	4	2	20	17
Nxf1	Nuclear RNA export factor 1 OS=Mus musculus OX=10090 GN=Nxf1 PE=1 SV=3	17	9	23	34
Atrx	Transcriptional regulator ATRX OS=Mus musculus OX=10090 GN=Atrx PE=1 SV=3	25	25	50	31
Rps10	40S ribosomal protein S10 OS=Mus musculus OX=10090 GN=Rps10 PE=1 SV=1	49	25	52	52
Rpl5	60S ribosomal protein L5 OS=Mus musculus OX=10090 GN=Rpl5 PE=1 SV=3	52	32	59	55
Dars1	Aspartate--tRNA ligase cytoplasmic OS=Mus musculus OX=10090 GN=Dars1 PE=1 SV=2	10	6	24	22
Dazap1	DAZ-associated protein 1 OS=Mus musculus OX=10090 GN=Dazap1 PE=1 SV=1	33	18	41	40
Eif2s3x	Eukaryotic translation initiation factor 2 subunit 3 X-linked OS=Mus musculus OX=10090 GN=Eif2s3x PE=1 SV=2	31	17	43	35
Kdm2a	Lysine-specific demethylase 2A OS=Mus musculus OX=10090 GN=Kdm2a PE=1 SV=2	6	3	22	17
Psmb5	Proteasome subunit beta type-5 OS=Mus musculus OX=10090 GN=Psmb5 PE=1 SV=3	7	4	19	22
Pkm	Pyruvate kinase PKM OS=Mus musculus OX=10090 GN=Pkm PE=1 SV=4	74	40	75	69
Prpf4	U4/U6 small nuclear ribonucleoprotein Prp4 OS=Mus musculus OX=10090 GN=Prpf4 PE=1 SV=1	25	10	31	34
Rps27l	40S ribosomal protein S27-like OS=Mus musculus OX=10090 GN=Rps27l PE=1 SV=3	10	6	24	21
Arl8b	ADP-ribosylation factor-like protein 8B OS=Mus musculus OX=10090 GN=Arl8b PE=1 SV=1	7	7	21	22
Csnk2b	Casein kinase II subunit beta OS=Mus musculus OX=10090 GN=Csnk2b PE=1 SV=1	9	9	21	26
Ctnnd1	Catenin delta-1 OS=Mus musculus OX=10090 GN=Ctnnd1 PE=1 SV=1	13	8	27	23
Dnm2	Dynamin GTPase (Fragment) OS=Mus musculus OX=10090 GN=Dnm2 PE=1 SV=1	1	1	13	18
Emd	Emerin OS=Mus musculus OX=10090 GN=Emd PE=1 SV=1	7	2	17	21
Faf2	FAS-associated factor 2 OS=Mus musculus OX=10090 GN=Faf2 PE=1 SV=2	3	4	21	15
C1qbp	Complement component 1 Q subcomponent-binding protein mitochondrial OS=Mus musculus OX=10090 GN=C1qbp PE=1 SV=1	15	3	25	21
Hnrnpa0	Heterogeneous nuclear ribonucleoprotein A0 OS=Mus musculus OX=10090 GN=Hnrnpa0 PE=1 SV=1	69	67	75	89
Vrk3	Inactive serine/threonine-protein kinase VRK3 OS=Mus musculus OX=10090 GN=Vrk3 PE=1 SV=2	3	2	14	19
Prpf6	Pre-mRNA-processing factor 6 OS=Mus musculus OX=10090 GN=Prpf6 PE=1 SV=1	14	4	24	22
Psma5	Proteasome subunit alpha type-5 OS=Mus musculus OX=10090 GN=Psma5 PE=1 SV=1	5	2	15	20
Strap	Serine-threonine kinase receptor-associated protein OS=Mus musculus OX=10090 GN=Strap PE=1 SV=2	60	38	64	62
Tardbp	TAR DNA-binding protein 43 OS=Mus musculus OX=10090 GN=Tardbp PE=1 SV=1	42	25	52	43
Tom1l2	TOM1-like protein 2 OS=Mus musculus OX=10090 GN=Tom1l2 PE=1 SV=1	19	18	30	35
Snrnp70	U1 small nuclear ribonucleoprotein 70 kDa OS=Mus musculus OX=10090 GN=Snrnp70 PE=1 SV=2	50	20	52	46
Vapa	Vesicle-associated membrane protein-associated protein A OS=Mus musculus OX=10090 GN=Vapa PE=1 SV=2	18	9	26	29
Eif4e	Eukaryotic translation initiation factor 4E OS=Mus musculus OX=10090 GN=Eif4e PE=1 SV=1	11	10	23	25
Qars1	Glutamine--tRNA ligase OS=Mus musculus OX=10090 GN=Qars1 PE=1 SV=1	12	3	20	22
H1-1	Histone H1.1 OS=Mus musculus OX=10090 GN=H1-1 PE=1 SV=2	19	25	34	37
Impdh2	Inosine-5'-monophosphate dehydrogenase 2 OS=Mus musculus OX=10090 GN=Impdh2 PE=1 SV=2	26	21	40	34
Idh2	Isocitrate dehydrogenase [NADP] mitochondrial OS=Mus musculus OX=10090 GN=Idh2 PE=1 SV=3	17	3	24	23
Mars1	Methionine--tRNA ligase cytoplasmic OS=Mus musculus OX=10090 GN=Mars1 PE=1 SV=1	6	2	19	16
Timm50	Mitochondrial import inner membrane translocase subunit TIM50 OS=Mus musculus OX=10090 GN=Timm50 PE=1 SV=1	9	3	20	19
Ssbp1	Single-stranded DNA-binding protein mitochondrial OS=Mus musculus OX=10090 GN=Ssbp1 PE=1 SV=1	6	4	22	15
Uggt1	UDP-glucose:glycoprotein glucosyltransferase 1 OS=Mus musculus OX=10090 GN=Uggt1 PE=1 SV=4	15	5	22	25
Rpsa	40S ribosomal protein SA OS=Mus musculus OX=10090 GN=Rpsa PE=1 SV=4	53	30	62	47
Rpl23a	60S ribosomal protein L23a OS=Mus musculus OX=10090 GN=Rpl23a PE=1 SV=1	70	51	77	70
Rpl24	60S ribosomal protein L24 OS=Mus musculus OX=10090 GN=Rpl24 PE=1 SV=2	29	26	43	38
Aurka	Aurora kinase A OS=Mus musculus OX=10090 GN=Aurka PE=1 SV=1	9	4	21	18
Lbr	Delta(14)-sterol reductase LBR OS=Mus musculus OX=10090 GN=Lbr PE=1 SV=2	8	9	26	17
Eloc	Elongin-C (Fragment) OS=Mus musculus OX=10090 GN=Eloc PE=1 SV=1	5	3	16	18
Eif2s1	Eukaryotic translation initiation factor 2 subunit 1 OS=Mus musculus OX=10090 GN=Eif2s1 PE=1 SV=3	31	9	32	34
Nbr1	Next to BRCA1 gene 1 protein OS=Mus musculus OX=10090 GN=Nbr1 PE=1 SV=1	2	1	18	11
Psip1	PC4 and SFRS1-interacting protein OS=Mus musculus OX=10090 GN=Psip1 PE=1 SV=1	26	11	33	30
Psmd6	26S proteasome non-ATPase regulatory subunit 6 OS=Mus musculus OX=10090 GN=Psmd6 PE=1 SV=1	56	33	56	58
Dhrs7b	Dehydrogenase/reductase SDR family member 7B OS=Mus musculus OX=10090 GN=Dhrs7b PE=1 SV=1	8	4	20	17
Dnmt3a	DNA (cytosine-5)-methyltransferase 3A OS=Mus musculus OX=10090 GN=Dnmt3a PE=1 SV=2	13	5	27	16
Dnajb11	DnaJ homolog subfamily B member 11 OS=Mus musculus OX=10090 GN=Dnajb11 PE=1 SV=1	15	3	22	21
Dynll1	Dynein light chain 1 cytoplasmic OS=Mus musculus OX=10090 GN=Dynll1 PE=1 SV=1	21	8	31	23
Prkra	Interferon-inducible double-stranded RNA-dependent protein kinase activator A OS=Mus musculus OX=10090 GN=Prkra PE=1 SV=1	13	14	27	25
Pura	Transcriptional activator protein Pur-alpha OS=Mus musculus OX=10090 GN=Pura PE=1 SV=1	16	15	26	30
Rpl31	60S ribosomal protein L31 OS=Mus musculus OX=10090 GN=Rpl31 PE=1 SV=1	17	19	36	24
Pfkl	ATP-dependent 6-phosphofructokinase liver type OS=Mus musculus OX=10090 GN=Pfkl PE=1 SV=4	11	2	19	18
Cenpv	Centromere protein V OS=Mus musculus OX=10090 GN=Cenpv PE=1 SV=2	5	2	14	17
Clta	Clathrin light chain OS=Mus musculus OX=10090 GN=Clta PE=1 SV=1	10	6	20	20
Copg2	Coatomer subunit gamma-2 OS=Mus musculus OX=10090 GN=Copg2 PE=1 SV=1	3	1	15	13
Khsrp	Far upstream element-binding protein 2 OS=Mus musculus OX=10090 GN=Khsrp PE=1 SV=1	32	18	36	38
Lgals1	Galectin-1 OS=Mus musculus OX=10090 GN=Lgals1 PE=1 SV=3	6	6	20	16
Krt14	Keratin type I cytoskeletal 14 OS=Mus musculus OX=10090 GN=Krt14 PE=1 SV=2	45	32	62	39
Psma1	Proteasome subunit alpha type-1 OS=Mus musculus OX=10090 GN=Psma1 PE=1 SV=1	19	10	28	25
Ago2	Protein argonaute-2 OS=Mus musculus OX=10090 GN=Ago2 PE=1 SV=3	25	21	32	38
Pacsin3	Protein kinase C and casein kinase II substrate protein 3 OS=Mus musculus OX=10090 GN=Pacsin3 PE=1 SV=1	7	2	18	15
Ik	Protein Red OS=Mus musculus OX=10090 GN=Ik PE=1 SV=2	16	8	25	23
Srsf2	Serine/arginine-rich splicing factor 2 OS=Mus musculus OX=10090 GN=Srsf2 PE=1 SV=4	13	9	28	18
Sfxn3	Sideroflexin-3 OS=Mus musculus OX=10090 GN=Sfxn3 PE=1 SV=1	3	1	10	18
Prpf3	U4/U6 small nuclear ribonucleoprotein Prp3 OS=Mus musculus OX=10090 GN=Prpf3 PE=1 SV=1	28	10	33	29
Vti1b	Vesicle transport through interaction with t-SNAREs 1B homolog OS=Mus musculus OX=10090 GN=Vti1b PE=1 SV=1	1	1	13	13
Vapb	Vesicle-associated membrane protein associated protein B and C OS=Mus musculus OX=10090 GN=Vapb PE=1 SV=1	2	1	14	13
Afg3l2	AFG3-like protein 2 OS=Mus musculus OX=10090 GN=Afg3l2 PE=1 SV=1	7	2	18	14
Uqcrc1	Cytochrome b-c1 complex subunit 1 mitochondrial OS=Mus musculus OX=10090 GN=Uqcrc1 PE=1 SV=2	11	10	24	20
Cpeb4	Cytoplasmic polyadenylation element-binding protein 4 OS=Mus musculus OX=10090 GN=Cpeb4 PE=1 SV=1	9	19	28	23
Elob	Elongin-B OS=Mus musculus OX=10090 GN=Elob PE=1 SV=1	3	1	11	16
Gxylt2	Glucoside xylosyltransferase 2 OS=Mus musculus OX=10090 GN=Gxylt2 PE=2 SV=1	1	3	13	14
Hnrnpul1	Heterogeneous nuclear ribonucleoprotein U-like protein 1 OS=Mus musculus OX=10090 GN=Hnrnpul1 PE=1 SV=1	15	9	24	23
Nifk	MKI67 FHA domain-interacting nucleolar phosphoprotein OS=Mus musculus OX=10090 GN=Nifk PE=1 SV=1	4	7	14	20
Mtdh	Protein LYRIC OS=Mus musculus OX=10090 GN=Mtdh PE=1 SV=1	9	6	19	19
Eefsec	Selenocysteine-specific elongation factor OS=Mus musculus OX=10090 GN=Eefsec PE=1 SV=2	5	1	16	13
Snx33	Sorting nexin-33 OS=Mus musculus OX=10090 GN=Snx33 PE=1 SV=1	2	2	13	14
Sf1	Splicing factor 1 OS=Mus musculus OX=10090 GN=Sf1 PE=1 SV=1	20	13	29	27
Zc3h11a	Zinc finger CCCH domain-containing protein 11A OS=Mus musculus OX=10090 GN=Zc3h11a PE=1 SV=1	29	18	37	33
Caprin1	Caprin-1 OS=Mus musculus OX=10090 GN=Caprin1 PE=1 SV=2	170	157	168	181
Tufm	Elongation factor Tu mitochondrial OS=Mus musculus OX=10090 GN=Tufm PE=1 SV=1	33	17	35	37
Mark3	MAP/microtubule affinity-regulating kinase 3 OS=Mus musculus OX=10090 GN=Mark3 PE=1 SV=2	14	15	29	22
Rab8a	Ras-related protein Rab-8A OS=Mus musculus OX=10090 GN=Rab8a PE=1 SV=2	1	1	12	12
Mrto4	Ribosome assembly factor mrt4 OS=Mus musculus OX=10090 GN=Mrto4 PE=1 SV=1	15	8	22	23
Ruvbl2	RuvB-like 2 OS=Mus musculus OX=10090 GN=Ruvbl2 PE=1 SV=3	7	2	17	14
Smc2	Structural maintenance of chromosomes protein 2 OS=Mus musculus OX=10090 GN=Smc2 PE=1 SV=2	3	1	13	13
Supt5h	Transcription elongation factor SPT5 OS=Mus musculus OX=10090 GN=Supt5h PE=1 SV=1	21	9	31	21
Psmd4	26S proteasome non-ATPase regulatory subunit 4 OS=Mus musculus OX=10090 GN=Psmd4 PE=1 SV=1	21	14	26	30
Alb	Albumin OS=Mus musculus OX=10090 GN=Alb PE=1 SV=3	12	7	17	23
Cul4b	Cullin-4B OS=Mus musculus OX=10090 GN=Cul4b PE=1 SV=2	5	5	16	15
Gemin4	Gem (Nuclear organelle) associated protein 4 OS=Mus musculus OX=10090 GN=Gemin4 PE=1 SV=1	9	4	21	13
Ppfibp1	Liprin-beta-1 OS=Mus musculus OX=10090 GN=Ppfibp1 PE=1 SV=3	14	18	28	25
Bop1	Ribosome biogenesis protein BOP1 OS=Mus musculus OX=10090 GN=Bop1 PE=1 SV=1	15	20	30	26
Rbm39	RNA-binding protein 39 OS=Mus musculus OX=10090 GN=Rbm39 PE=1 SV=2	25	17	35	28
Trim28	Transcription intermediary factor 1-beta OS=Mus musculus OX=10090 GN=Trim28 PE=1 SV=3	24	4	23	26
Tdrd3	Tudor domain-containing protein 3 OS=Mus musculus OX=10090 GN=Tdrd3 PE=1 SV=4	8	12	21	20
Ubap2	Ubiquitin-associated protein 2 OS=Mus musculus OX=10090 GN=Ubap2 PE=1 SV=1	8	3	16	16
Rpl36	60S ribosomal protein L36 OS=Mus musculus OX=10090 GN=Rpl36 PE=1 SV=1	7	8	19	16
Eif2s2	Eukaryotic translation initiation factor 2 subunit 2 OS=Mus musculus OX=10090 GN=Eif2s2 PE=1 SV=1	14	5	24	15
Eif2a	Eukaryotic translation initiation factor 2A OS=Mus musculus OX=10090 GN=Eif2a PE=1 SV=2	10	5	20	15
Mtrex	Exosome RNA helicase MTR4 OS=Mus musculus OX=10090 GN=Mtrex PE=1 SV=1	21	15	33	23
Krt42	Keratin type I cytoskeletal 42 OS=Mus musculus OX=10090 GN=Krt42 PE=1 SV=1	32	20	43	29
Lemd2	LEM domain-containing protein 2 OS=Mus musculus OX=10090 GN=Lemd2 PE=1 SV=1	15	11	24	22
Puf60	Poly(U)-binding-splicing factor PUF60 OS=Mus musculus OX=10090 GN=Puf60 PE=1 SV=2	12	3	20	15
Rcc2	Protein RCC2 OS=Mus musculus OX=10090 GN=Rcc2 PE=1 SV=1	23	15	36	22
Gdi2	Rab GDP dissociation inhibitor beta OS=Mus musculus OX=10090 GN=Gdi2 PE=1 SV=1	16	4	19	21
Rfc3	Replication factor C subunit 3 OS=Mus musculus OX=10090 GN=Rfc3 PE=1 SV=1	9	11	22	18
Rpf2	Ribosome production factor 2 homolog OS=Mus musculus OX=10090 GN=Rpf2 PE=2 SV=2	13	18	25	26
Tmem43	Transmembrane protein 43 OS=Mus musculus OX=10090 GN=Tmem43 PE=1 SV=1	11	5	16	20
Tecr	Very-long-chain enoyl-CoA reductase OS=Mus musculus OX=10090 GN=Tecr PE=1 SV=1	12	6	18	20
Vcl	Vinculin OS=Mus musculus OX=10090 GN=Vcl PE=1 SV=4	12	9	18	23
Smu1	WD40 repeat-containing protein SMU1 OS=Mus musculus OX=10090 GN=Smu1 PE=2 SV=2	19	11	21	29
Arl1	ADP-ribosylation factor-like protein 1 OS=Mus musculus OX=10090 GN=Arl1 PE=1 SV=1	2	1	11	11
Atxn2	Ataxin-2 OS=Mus musculus OX=10090 GN=Atxn2 PE=1 SV=1	24	19	31	31
Abcf1	ATP-binding cassette sub-family F member 1 OS=Mus musculus OX=10090 GN=Abcf1 PE=1 SV=1	25	7	29	22
Prkar1a	cAMP-dependent protein kinase type I-alpha regulatory subunit OS=Mus musculus OX=10090 GN=Prkar1a PE=1 SV=3	3	1	10	13
Ccar2	Cell cycle and apoptosis regulator protein 2 OS=Mus musculus OX=10090 GN=Ccar2 PE=1 SV=2	12	4	14	21
Dpm1	Dolichol-phosphate mannosyltransferase subunit 1 OS=Mus musculus OX=10090 GN=Dpm1 PE=1 SV=1	2	1	13	9
Hip1	Huntingtin-interacting protein 1 OS=Mus musculus OX=10090 GN=Hip1 PE=1 SV=2	11	4	22	12
Larp4b	La-related protein 4B OS=Mus musculus OX=10090 GN=Larp4b PE=1 SV=2	13	5	17	20
Ninj1	Ninjurin-1 OS=Mus musculus OX=10090 GN=Ninj1 PE=1 SV=1	11	9	19	20
Nop58	Nucleolar protein 58 OS=Mus musculus OX=10090 GN=Nop58 PE=1 SV=1	15	41	40	35
Tial1	Nucleolysin TIAR OS=Mus musculus OX=10090 GN=Tial1 PE=1 SV=1	8	1	17	11
Ddx27	Probable ATP-dependent RNA helicase DDX27 OS=Mus musculus OX=10090 GN=Ddx27 PE=1 SV=3	5	12	17	19
Psma4	Proteasome subunit alpha type-4 OS=Mus musculus OX=10090 GN=Psma4 PE=1 SV=1	10	3	15	17
Tpi1	Triosephosphate isomerase OS=Mus musculus OX=10090 GN=Tpi1 PE=1 SV=5	19	13	27	24
Upf3b	UPF3 regulator of nonsense transcripts homolog B (yeast) OS=Mus musculus OX=10090 GN=Upf3b PE=1 SV=1	13	9	21	20
Vta1	Vacuolar protein sorting-associated protein VTA1 homolog OS=Mus musculus OX=10090 GN=Vta1 PE=1 SV=1	7	1	15	12
Wdr1	WD repeat-containing protein 1 OS=Mus musculus OX=10090 GN=Wdr1 PE=1 SV=3	68	31	59	59
Mrps9	28S ribosomal protein S9 mitochondrial OS=Mus musculus OX=10090 GN=Mrps9 PE=1 SV=3	3	2	13	10
Rps25	40S ribosomal protein S25 OS=Mus musculus OX=10090 GN=Rps25 PE=1 SV=1	24	18	31	29
Rpl14	60S ribosomal protein L14 OS=Mus musculus OX=10090 GN=Rpl14 PE=1 SV=3	30	21	29	40
Rpl17	60S ribosomal protein L17 OS=Mus musculus OX=10090 GN=Rpl17 PE=1 SV=1	81	63	81	81
Ddx1	ATP-dependent RNA helicase DDX1 OS=Mus musculus OX=10090 GN=Ddx1 PE=1 SV=1	120	182	164	156
Prkaca	cAMP-dependent protein kinase catalytic subunit alpha OS=Mus musculus OX=10090 GN=Prkaca PE=1 SV=3	7	9	17	17
Eps8	Epidermal growth factor receptor kinase substrate 8 OS=Mus musculus OX=10090 GN=Eps8 PE=1 SV=2	19	8	27	18
Gtf2i	General transcription factor II-I OS=Mus musculus OX=10090 GN=Gtf2i PE=1 SV=1	34	22	43	31
Rbbp4	Histone-binding protein RBBP4 OS=Mus musculus OX=10090 GN=Rbbp4 PE=1 SV=5	32	14	36	28
Idh1	Isocitrate dehydrogenase [NADP] cytoplasmic OS=Mus musculus OX=10090 GN=Idh1 PE=1 SV=2	4	2	12	12
Keap1	Kelch-like ECH-associated protein 1 OS=Mus musculus OX=10090 GN=Keap1 PE=1 SV=1	3	6	14	13
Acp1	Low molecular weight phosphotyrosine protein phosphatase OS=Mus musculus OX=10090 GN=Acp1 PE=1 SV=3	9	2	15	14
Ddx47	Probable ATP-dependent RNA helicase DDX47 OS=Mus musculus OX=10090 GN=Ddx47 PE=2 SV=2	14	14	24	22
Phb2	Prohibitin-2 OS=Mus musculus OX=10090 GN=Phb2 PE=1 SV=1	9	6	16	17
Psmb7	Proteasome subunit beta type-7 OS=Mus musculus OX=10090 GN=Psmb7 PE=1 SV=1	5	6	14	15
Rbm28	RNA-binding protein 28 OS=Mus musculus OX=10090 GN=Rbm28 PE=1 SV=4	12	11	17	24
Ppp2r2a	Serine/threonine-protein phosphatase 2A 55 kDa regulatory subunit B alpha isoform OS=Mus musculus OX=10090 GN=Ppp2r2a PE=1 SV=1	28	17	32	31
Cct2	T-complex protein 1 subunit beta OS=Mus musculus OX=10090 GN=Cct2 PE=1 SV=4	25	10	28	25
Snrpa1	U2 small nuclear ribonucleoprotein A' OS=Mus musculus OX=10090 GN=Snrpa1 PE=1 SV=2	16	5	19	20
Rpl18a	60S ribosomal protein L18a OS=Mus musculus OX=10090 GN=Rpl18a PE=1 SV=1	54	37	53	55
Rpl9	60S ribosomal protein L9 OS=Mus musculus OX=10090 GN=Rpl9 PE=1 SV=2	44	40	54	47
Rpl9-ps6	60S ribosomal protein L9 OS=Mus musculus OX=10090 GN=Rpl9-ps6 PE=3 SV=1	44	40	54	47
Angptl2	Angiopoietin-related protein 2 OS=Mus musculus OX=10090 GN=Angptl2 PE=2 SV=2	5	4	13	13
Tfap2a	AP-2 transcription factor OS=Mus musculus OX=10090 GN=Tfap2a PE=1 SV=1	5	4	17	9
Calu	Calumenin OS=Mus musculus OX=10090 GN=Calu PE=1 SV=1	16	10	20	23
Cpsf3	Cleavage and polyadenylation specificity factor subunit 3 OS=Mus musculus OX=10090 GN=Cpsf3 PE=1 SV=2	13	7	20	17
Polr2b	DNA-directed RNA polymerase II subunit RPB2 OS=Mus musculus OX=10090 GN=Polr2b PE=1 SV=2	10	12	20	19
Mta1	Metastasis-associated protein MTA1 OS=Mus musculus OX=10090 GN=Mta1 PE=1 SV=1	24	4	26	19
Ruvbl1	RuvB-like 1 OS=Mus musculus OX=10090 GN=Ruvbl1 PE=1 SV=1	7	4	14	14
Atp6v1g1	V-type proton ATPase subunit G 1 OS=Mus musculus OX=10090 GN=Atp6v1g1 PE=1 SV=3	1	2	10	10
Rpl27a	60S ribosomal protein L27a OS=Mus musculus OX=10090 GN=Rpl27a PE=1 SV=5	18	21	27	28
Clasp2	CLIP-associating protein 2 OS=Mus musculus OX=10090 GN=Clasp2 PE=1 SV=1	4	3	14	9
Cfl2	Cofilin-2 OS=Mus musculus OX=10090 GN=Cfl2 PE=1 SV=1	19	7	21	21
Top3b	DNA topoisomerase 3-beta-1 OS=Mus musculus OX=10090 GN=Top3b PE=1 SV=1	17	25	29	29
Arhgef2	Guanine nucleotide exchange factor H1 OS=Mus musculus OX=10090 GN=Arhgef2 PE=1 SV=1	14	13	24	19
Trap1	Heat shock protein 75 kDa mitochondrial OS=Mus musculus OX=10090 GN=Trap1 PE=1 SV=1	4	3	12	11
Rbbp7	Histone-binding protein RBBP7 OS=Mus musculus OX=10090 GN=Rbbp7 PE=1 SV=1	28	14	31	27
Lrrc59	Leucine-rich repeat-containing protein 59 OS=Mus musculus OX=10090 GN=Lrrc59 PE=1 SV=1	13	5	18	16
Metap2	Methionine aminopeptidase 2 OS=Mus musculus OX=10090 GN=Metap2 PE=1 SV=1	5	2	14	9
Plrg1	Pleiotropic regulator 1 OS=Mus musculus OX=10090 GN=Plrg1 PE=1 SV=1	24	10	23	27
Pawr	PRKC apoptosis WT1 regulator protein OS=Mus musculus OX=10090 GN=Pawr PE=1 SV=2	22	14	27	25
Rbm19	Probable RNA-binding protein 19 OS=Mus musculus OX=10090 GN=Rbm19 PE=1 SV=1	5	5	14	12
Iws1	Protein IWS1 homolog OS=Mus musculus OX=10090 GN=Iws1 PE=1 SV=1	9	4	17	12
Parp12	Protein mono-ADP-ribosyltransferase PARP12 OS=Mus musculus OX=10090 GN=Parp12 PE=1 SV=3	11	8	16	19
Rpl19	Ribosomal protein L19 OS=Mus musculus OX=10090 GN=Rpl19 PE=1 SV=1	60	43	67	52
Vrk1	Serine/threonine-protein kinase VRK1 OS=Mus musculus OX=10090 GN=Vrk1 PE=1 SV=2	22	14	29	23
Sf3a3	Splicing factor 3A subunit 3 OS=Mus musculus OX=10090 GN=Sf3a3 PE=1 SV=2	18	14	24	24
Nsf	Vesicle-fusing ATPase OS=Mus musculus OX=10090 GN=Nsf PE=1 SV=2	49	27	47	45
Zc3h14	Zinc finger CCCH domain-containing protein 14 OS=Mus musculus OX=10090 GN=Zc3h14 PE=1 SV=1	8	7	18	13
Pdk3	[Pyruvate dehydrogenase (acetyl-transferring)] kinase isozyme 3 mitochondrial OS=Mus musculus OX=10090 GN=Pdk3 PE=1 SV=1	4	3	10	12
Rps11	40S ribosomal protein S11 OS=Mus musculus OX=10090 GN=Rps11 PE=1 SV=3	66	68	76	73
Bysl	Bystin OS=Mus musculus OX=10090 GN=Bysl PE=1 SV=3	12	10	22	15
Cstf3	Cleavage stimulation factor subunit 3 OS=Mus musculus OX=10090 GN=Cstf3 PE=1 SV=1	11	2	14	14
Celf1	CUGBP Elav-like family member 1 OS=Mus musculus OX=10090 GN=Celf1 PE=1 SV=2	25	9	27	22
Hnrnpll	Heterogeneous nuclear ribonucleoprotein L-like OS=Mus musculus OX=10090 GN=Hnrnpll PE=1 SV=3	25	10	23	27
Krt16	Keratin type I cytoskeletal 16 OS=Mus musculus OX=10090 GN=Krt16 PE=1 SV=3	17	11	24	19
Oat	Ornithine aminotransferase mitochondrial OS=Mus musculus OX=10090 GN=Oat PE=1 SV=1	7	2	14	10
Prrc2a	Protein PRRC2A OS=Mus musculus OX=10090 GN=Prrc2a PE=1 SV=1	22	21	32	26
Scd2	Stearoyl-CoA desaturase 2 OS=Mus musculus OX=10090 GN=Scd2 PE=1 SV=2	3	4	11	11
Sdha	Succinate dehydrogenase [ubiquinone] flavoprotein subunit mitochondrial OS=Mus musculus OX=10090 GN=Sdha PE=1 SV=1	7	3	15	10
Psmd7	26S proteasome non-ATPase regulatory subunit 7 OS=Mus musculus OX=10090 GN=Psmd7 PE=1 SV=2	44	23	43	38
Rps3a	40S ribosomal protein S3a OS=Mus musculus OX=10090 GN=Rps3a PE=1 SV=3	139	125	142	136
Anxa2	Annexin A2 OS=Mus musculus OX=10090 GN=Anxa2 PE=1 SV=2	15	6	14	21
Eif6	Eukaryotic translation initiation factor 6 OS=Mus musculus OX=10090 GN=Eif6 PE=1 SV=2	1	5	10	10
Zdhhc5	Palmitoyltransferase ZDHHC5 OS=Mus musculus OX=10090 GN=Zdhhc5 PE=1 SV=1	9	7	16	14
Pfn1	Profilin-1 OS=Mus musculus OX=10090 GN=Pfn1 PE=1 SV=2	1	2	8	9
Rangap1	Ran GTPase-activating protein 1 OS=Mus musculus OX=10090 GN=Rangap1 PE=1 SV=2	7	5	16	10
Rrbp1	Ribosome-binding protein 1 OS=Mus musculus OX=10090 GN=Rrbp1 PE=1 SV=1	43	30	49	38
Rbms2	RNA-binding motif single-stranded-interacting protein 2 OS=Mus musculus OX=10090 GN=Rbms2 PE=1 SV=1	9	3	14	12
Lmtk2	Serine/threonine-protein kinase LMTK2 OS=Mus musculus OX=10090 GN=Lmtk2 PE=1 SV=3	8	4	12	14
Sorbs1	Sorbin and SH3 domain-containing protein 1 OS=Mus musculus OX=10090 GN=Sorbs1 PE=1 SV=1	32	24	33	37
Ythdf2	YTH domain-containing family protein 2 OS=Mus musculus OX=10090 GN=Ythdf2 PE=1 SV=1	9	8	18	13
Ywhab	14-3-3 protein beta/alpha OS=Mus musculus OX=10090 GN=Ywhab PE=1 SV=3	42	20	40	35
Rps15	40S ribosomal protein S15 OS=Mus musculus OX=10090 GN=Rps15 PE=1 SV=2	47	36	45	51
Rpl34	60S ribosomal protein L34 OS=Mus musculus OX=10090 GN=Rpl34 PE=1 SV=2	6	7	14	12
Arpc5l	Actin-related protein 2/3 complex subunit 5-like protein OS=Mus musculus OX=10090 GN=Arpc5l PE=1 SV=1	16	11	19	21
Cdc42	Cell division control protein 42 homolog OS=Mus musculus OX=10090 GN=Cdc42 PE=1 SV=2	15	9	18	19
Cltb	Clathrin light chain B OS=Mus musculus OX=10090 GN=Cltb PE=1 SV=1	4	2	10	9
Ccdc69	Coiled-coil domain-containing protein 69 OS=Mus musculus OX=10090 GN=Ccdc69 PE=1 SV=1	10	4	12	15
Stt3b	Dolichyl-diphosphooligosaccharide--protein glycotransferase OS=Mus musculus OX=10090 GN=Stt3b PE=1 SV=1	2	5	11	9
Frmd4a	FERM domain-containing protein 4A OS=Mus musculus OX=10090 GN=Frmd4a PE=1 SV=2	2	3	10	8
Mta2	Metastasis-associated protein MTA2 OS=Mus musculus OX=10090 GN=Mta2 PE=1 SV=1	14	5	15	17
Mbp	Myelin basic protein OS=Mus musculus OX=10090 GN=Mbp PE=1 SV=2	6	6	11	14
Myef2	Myelin expression factor 2 OS=Mus musculus OX=10090 GN=Myef2 PE=1 SV=2	43	33	41	48
Tia1	Nucleolysin TIA-1 OS=Mus musculus OX=10090 GN=Tia1 PE=1 SV=1	5	1	13	6
Fam98b	Protein FAM98B OS=Mus musculus OX=10090 GN=Fam98b PE=1 SV=1	12	10	19	16
Pum1	Pumilio homolog 1 OS=Mus musculus OX=10090 GN=Pum1 PE=1 SV=2	4	3	8	12
Septin9	Septin-9 OS=Mus musculus OX=10090 GN=Septin9 PE=1 SV=1	11	3	15	12
Serpinh1	Serpin H1 OS=Mus musculus OX=10090 GN=Serpinh1 PE=1 SV=3	9	3	15	10
Acads	Short-chain specific acyl-CoA dehydrogenase mitochondrial OS=Mus musculus OX=10090 GN=Acads PE=1 SV=2	3	1	10	7
Thoc1	THO complex subunit 1 OS=Mus musculus OX=10090 GN=Thoc1 PE=1 SV=1	16	7	18	18
Ugdh	UDP-glucose 6-dehydrogenase OS=Mus musculus OX=10090 GN=Ugdh PE=1 SV=1	15	4	18	14
Spata5	Vesicle-fusing ATPase OS=Mus musculus OX=10090 GN=Spata5 PE=1 SV=1	5	3	12	9
Zfr	Zinc finger RNA-binding protein OS=Mus musculus OX=10090 GN=Zfr PE=1 SV=2	19	18	21	29
Rpl6	60S ribosomal protein L6 OS=Mus musculus OX=10090 GN=Rpl6 PE=1 SV=3	107	83	111	91
Aurkb	Aurora kinase B OS=Mus musculus OX=10090 GN=Aurkb PE=1 SV=2	4	7	14	9
Gspt1	Eukaryotic peptide chain release factor GTP-binding subunit ERF3A OS=Mus musculus OX=10090 GN=Gspt1 PE=1 SV=2	21	9	24	18
Eif3f	Eukaryotic translation initiation factor 3 subunit F OS=Mus musculus OX=10090 GN=Eif3f PE=1 SV=2	6	2	13	7
Eif4g1	Eukaryotic translation initiation factor 4 gamma 1 OS=Mus musculus OX=10090 GN=Eif4g1 PE=1 SV=1	79	49	80	60
Krt17	Keratin type I cytoskeletal 17 OS=Mus musculus OX=10090 GN=Krt17 PE=1 SV=3	43	29	50	34
Ldha	L-lactate dehydrogenase OS=Mus musculus OX=10090 GN=Ldha PE=1 SV=1	18	9	18	21
Myadm	Myeloid-associated differentiation marker OS=Mus musculus OX=10090 GN=Myadm PE=1 SV=2	8	1	10	11
Mark2	Non-specific serine/threonine protein kinase OS=Mus musculus OX=10090 GN=Mark2 PE=1 SV=1	5	5	10	12
Pgam1	Phosphoglycerate mutase 1 OS=Mus musculus OX=10090 GN=Pgam1 PE=1 SV=3	8	4	12	12
Bud31	Protein BUD31 homolog OS=Mus musculus OX=10090 GN=Bud31 PE=1 SV=2	4	4	11	9
Rab21	Ras-related protein Rab-21 OS=Mus musculus OX=10090 GN=Rab21 PE=1 SV=4	1	3	7	9
Rrs1	Ribosome biogenesis regulatory protein homolog OS=Mus musculus OX=10090 GN=Rrs1 PE=1 SV=1	12	22	26	20
Rrp12	RRP12-like protein OS=Mus musculus OX=10090 GN=Rrp12 PE=1 SV=1	12	9	18	15
Sltm	SAFB-like transcription modulator OS=Mus musculus OX=10090 GN=Sltm PE=1 SV=1	9	13	15	19
Wbp11	WW domain-binding protein 11 OS=Mus musculus OX=10090 GN=Wbp11 PE=1 SV=2	8	3	13	10
Zeb2	Zinc finger E-box-binding homeobox 2 OS=Mus musculus OX=10090 GN=Zeb2 PE=1 SV=1	12	9	17	16
Psmd8	26S proteasome non-ATPase regulatory subunit 8 OS=Mus musculus OX=10090 GN=Psmd8 PE=1 SV=2	12	9	16	16
Rpl27	60S ribosomal protein L27 OS=Mus musculus OX=10090 GN=Rpl27 PE=1 SV=2	41	38	48	42
Rpl28	60S ribosomal protein L28 OS=Mus musculus OX=10090 GN=Rpl28 PE=1 SV=2	29	33	38	35
Rpl7	60S ribosomal protein L7 OS=Mus musculus OX=10090 GN=Rpl7 PE=1 SV=2	120	106	117	120
Afdn	Afadin OS=Mus musculus OX=10090 GN=Afdn PE=1 SV=2	8	3	13	9
Csnk2a2	Casein kinase II subunit alpha' OS=Mus musculus OX=10090 GN=Csnk2a2 PE=1 SV=1	41	35	43	44
Cdc5l	Cell division cycle 5-like protein OS=Mus musculus OX=10090 GN=Cdc5l PE=1 SV=2	36	27	36	38
Dnajc9	DnaJ homolog subfamily C member 9 OS=Mus musculus OX=10090 GN=Dnajc9 PE=1 SV=2	17	8	18	18
Stau1	Double-stranded RNA-binding protein Staufen homolog 1 OS=Mus musculus OX=10090 GN=Stau1 PE=1 SV=1	18	16	27	18
Rnf114	E3 ubiquitin-protein ligase RNF114 OS=Mus musculus OX=10090 GN=Rnf114 PE=1 SV=2	3	1	8	7
Ubr5	E3 ubiquitin-protein ligase UBR5 OS=Mus musculus OX=10090 GN=Ubr5 PE=1 SV=2	1	1	6	7
Eif3c	Eukaryotic translation initiation factor 3 subunit C OS=Mus musculus OX=10090 GN=Eif3c PE=1 SV=1	14	4	16	13
Kpna4	Importin subunit alpha-3 OS=Mus musculus OX=10090 GN=Kpna4 PE=1 SV=1	12	4	12	15
Fkbp6	Inactive peptidyl-prolyl cis-trans isomerase FKBP6 OS=Mus musculus OX=10090 GN=Fkbp6 PE=1 SV=1	26	25	33	29
Jup	Junction plakoglobin OS=Mus musculus OX=10090 GN=Jup PE=1 SV=3	14	9	17	17
Klhdc10	Kelch domain-containing protein 10 OS=Mus musculus OX=10090 GN=Klhdc10 PE=1 SV=1	5	1	9	8
Lars1	Leucine--tRNA ligase cytoplasmic OS=Mus musculus OX=10090 GN=Lars1 PE=1 SV=2	8	2	11	10
Mapre1	Microtubule-associated protein RP/EB family member 1 OS=Mus musculus OX=10090 GN=Mapre1 PE=1 SV=3	27	13	27	24
Ola1	Obg-like ATPase 1 OS=Mus musculus OX=10090 GN=Ola1 PE=1 SV=1	7	1	12	7
Prdx1	Peroxiredoxin-1 OS=Mus musculus OX=10090 GN=Prdx1 PE=1 SV=1	65	57	65	68
Pes1	Pescadillo homolog OS=Mus musculus OX=10090 GN=Pes1 PE=1 SV=1	7	9	14	13
Ftsj3	pre-rRNA 2'-O-ribose RNA methyltransferase FTSJ3 OS=Mus musculus OX=10090 GN=Ftsj3 PE=1 SV=1	15	18	23	21
Dimt1	Probable dimethyladenosine transferase OS=Mus musculus OX=10090 GN=Dimt1 PE=2 SV=1	6	2	9	10
Pop1	Processing of precursor 1 ribonuclease P/MRP family (S. cerevisiae) OS=Mus musculus OX=10090 GN=Pop1 PE=1 SV=1	16	9	20	16
Pdia3	Protein disulfide-isomerase A3 OS=Mus musculus OX=10090 GN=Pdia3 PE=1 SV=2	5	3	12	7
Pum2	Pumilio homolog 2 OS=Mus musculus OX=10090 GN=Pum2 PE=1 SV=1	5	4	9	11
Rprd1b	Regulation of nuclear pre-mRNA domain-containing protein 1B OS=Mus musculus OX=10090 GN=Rprd1b PE=1 SV=1	4	1	8	8
Rtkn	Rhotekin OS=Mus musculus OX=10090 GN=Rtkn PE=1 SV=3	6	3	11	9
Rbm45	RNA-binding protein 45 OS=Mus musculus OX=10090 GN=Rbm45 PE=1 SV=1	4	3	9	9
Tpp1	Tripeptidyl-peptidase 1 OS=Mus musculus OX=10090 GN=Tpp1 PE=1 SV=2	1	1	6	7
Fau	40S ribosomal protein S30 OS=Mus musculus OX=10090 GN=Fau PE=1 SV=1	5	4	11	8
Rpl35a	60S ribosomal protein L35a OS=Mus musculus OX=10090 GN=Rpl35a PE=1 SV=2	9	9	12	16
Alx1	ALX homeobox protein 1 OS=Mus musculus OX=10090 GN=Alx1 PE=1 SV=1	1	2	7	6
Sntb2	Beta-2-syntrophin OS=Mus musculus OX=10090 GN=Sntb2 PE=1 SV=2	1	1	7	5
Clint1	Clathrin interactor 1 OS=Mus musculus OX=10090 GN=Clint1 PE=1 SV=1	9	8	13	14
Cpsf6	Cleavage and polyadenylation specificity factor subunit 6 OS=Mus musculus OX=10090 GN=Cpsf6 PE=1 SV=1	22	13	22	23
Crnkl1	Crooked neck-like protein 1 OS=Mus musculus OX=10090 GN=Crnkl1 PE=1 SV=1	5	4	9	10
Mcm5	DNA replication licensing factor MCM5 OS=Mus musculus OX=10090 GN=Mcm5 PE=1 SV=2	11	4	14	11
Map2k3	Dual specificity mitogen-activated protein kinase kinase 3 OS=Mus musculus OX=10090 GN=Map2k3 PE=1 SV=2	3	5	9	9
Eif3d	Eukaryotic translation initiation factor 3 subunit D OS=Mus musculus OX=10090 GN=Eif3d PE=1 SV=2	19	12	23	18
Trip13	Pachytene checkpoint protein 2 homolog OS=Mus musculus OX=10090 GN=Trip13 PE=1 SV=1	3	2	8	7
Psmb3	Proteasome subunit beta type-3 OS=Mus musculus OX=10090 GN=Psmb3 PE=1 SV=1	12	4	13	13
Aatf	Protein AATF OS=Mus musculus OX=10090 GN=Aatf PE=1 SV=1	5	5	9	11
Ewsr1	RNA-binding protein EWS OS=Mus musculus OX=10090 GN=Ewsr1 PE=1 SV=1	41	19	39	31
Snrpe	Small nuclear ribonucleoprotein E OS=Mus musculus OX=10090 GN=Snrpe PE=1 SV=1	6	2	8	10
Tprn	Taperin OS=Mus musculus OX=10090 GN=Tprn PE=1 SV=1	2	3	7	8
Sox5	Transcription factor SOX-5 OS=Mus musculus OX=10090 GN=Sox5 PE=1 SV=1	4	1	8	7
Ythdf1	YTH domain-containing family protein 1 OS=Mus musculus OX=10090 GN=Ythdf1 PE=1 SV=1	16	10	19	17
Ywhag	14-3-3 protein gamma OS=Mus musculus OX=10090 GN=Ywhag PE=1 SV=2	50	34	52	41
Rps29	40S ribosomal protein S29 OS=Mus musculus OX=10090 GN=Rps29 PE=1 SV=2	4	5	10	8
Rpl30	60S ribosomal protein L30 OS=Mus musculus OX=10090 GN=Rpl30 PE=1 SV=2	18	11	16	22
Rpl7l1	60S ribosomal protein L7-like 1 OS=Mus musculus OX=10090 GN=Rpl7l1 PE=1 SV=1	3	8	10	10
Ap3b1	AP-3 complex subunit beta-1 OS=Mus musculus OX=10090 GN=Ap3b1 PE=1 SV=2	5	4	9	9
Csnk2a1	Casein kinase II subunit alpha OS=Mus musculus OX=10090 GN=Csnk2a1 PE=1 SV=2	53	85	77	70
Dynll2	Dynein light chain 2 cytoplasmic OS=Mus musculus OX=10090 GN=Dynll2 PE=1 SV=1	12	4	14	11
Eef1d	Elongation factor 1-delta (Fragment) OS=Mus musculus OX=10090 GN=Eef1d PE=1 SV=1	9	6	11	13
Eif4a3	Eukaryotic initiation factor 4A-III OS=Mus musculus OX=10090 GN=Eif4a3 PE=1 SV=3	83	64	81	75
Fbxo11	F-box only protein 11 OS=Mus musculus OX=10090 GN=Fbxo11 PE=1 SV=3	6	11	11	15
H1f6	H1.6 linker histone cluster member OS=Mus musculus OX=10090 GN=H1f6 PE=1 SV=1	48	56	58	55
Lmod1	Leiomodin-1 OS=Mus musculus OX=10090 GN=Lmod1 PE=1 SV=1		10	9	10
Bub3	Mitotic checkpoint protein BUB3 OS=Mus musculus OX=10090 GN=Bub3 PE=1 SV=1	5	2	10	6
Numa1	Nuclear mitotic apparatus protein 1 OS=Mus musculus OX=10090 GN=Numa1 PE=1 SV=1	29	6	38	6
Nop16	Nucleolar protein 16 OS=Mus musculus OX=10090 GN=Nop16 PE=1 SV=1	10	8	14	13
Nop56	Nucleolar protein 56 OS=Mus musculus OX=10090 GN=Nop56 PE=1 SV=2	25	37	35	36
Pcid2	PCI domain-containing protein 2 OS=Mus musculus OX=10090 GN=Pcid2 PE=1 SV=1	3	1	7	6
Rfc2	Replication factor C subunit 2 OS=Mus musculus OX=10090 GN=Rfc2 PE=1 SV=1	6	3	9	9
Rnps1	RNA-binding protein with serine-rich domain 1 OS=Mus musculus OX=10090 GN=Rnps1 PE=1 SV=1	18	10	23	14
Scaf11	SR-related CTD-associated factor 11 OS=Mus musculus OX=10090 GN=Scaf11 PE=1 SV=1	8	4	13	8
Tpx2	Targeting protein for Xklp2 OS=Mus musculus OX=10090 GN=Tpx2 PE=1 SV=1	12	11	17	15
Purb	Transcriptional activator protein Pur-beta OS=Mus musculus OX=10090 GN=Purb PE=1 SV=3	18	19	25	21
Usp10	Ubiquitin carboxyl-terminal hydrolase 10 OS=Mus musculus OX=10090 GN=Usp10 PE=1 SV=3	33	41	45	38
Rps2	40S ribosomal protein S2 OS=Mus musculus OX=10090 GN=Rps2 PE=1 SV=3	85	93	92	94
Ddx54	ATP-dependent RNA helicase DDX54 OS=Mus musculus OX=10090 GN=Ddx54 PE=1 SV=1	1	2	5	6
Calm1	Calmodulin-1 OS=Mus musculus OX=10090 GN=Calm1 PE=1 SV=1	93	120	115	106
Calm2	Calmodulin-2 OS=Mus musculus OX=10090 GN=Calm2 PE=1 SV=1	93	120	115	106
Calm3	Calmodulin-3 OS=Mus musculus OX=10090 GN=Calm3 PE=1 SV=1	93	120	115	106
Prkar2b	cAMP-dependent protein kinase type II-beta regulatory subunit OS=Mus musculus OX=10090 GN=Prkar2b PE=1 SV=3	4	6	8	10
Chmp4b	Charged multivesicular body protein 4b OS=Mus musculus OX=10090 GN=Chmp4b PE=1 SV=2	5	4	8	9
Chtop	Chromatin target of PRMT1 protein OS=Mus musculus OX=10090 GN=Chtop PE=1 SV=2	8	7	13	10
Uqcrh	Cytochrome b-c1 complex subunit 6 mitochondrial OS=Mus musculus OX=10090 GN=Uqcrh PE=1 SV=2	1	1	5	5
Dst	Dystonin OS=Mus musculus OX=10090 GN=Dst PE=1 SV=1	50	90	80	68
Fth1	Ferritin heavy chain OS=Mus musculus OX=10090 GN=Fth1 PE=1 SV=2	9	2	9	10
Gmds	GDP-mannose 4 6 dehydratase OS=Mus musculus OX=10090 GN=Gmds PE=1 SV=1	3	1	5	7
Nop14	Nucleolar protein 14 OS=Mus musculus OX=10090 GN=Nop14 PE=1 SV=2	7	7	12	10
Ptcd1	Pentatricopeptide repeat-containing protein 1 mitochondrial OS=Mus musculus OX=10090 GN=Ptcd1 PE=2 SV=2	2	1	7	4
Paip1	Polyadenylate-binding protein-interacting protein 1 OS=Mus musculus OX=10090 GN=Paip1 PE=1 SV=1	7	2	10	7
Nop2	Probable 28S rRNA (cytosine-C(5))-methyltransferase OS=Mus musculus OX=10090 GN=Nop2 PE=1 SV=1	22	21	30	21
Ebna1bp2	Probable rRNA-processing protein EBP2 OS=Mus musculus OX=10090 GN=Ebna1bp2 PE=2 SV=1	5	15	16	12
Strbp	Spermatid perinuclear RNA-binding protein OS=Mus musculus OX=10090 GN=Strbp PE=1 SV=1	10	10	12	16
Smc1a	Structural maintenance of chromosomes protein 1A OS=Mus musculus OX=10090 GN=Smc1a PE=1 SV=4	3	8	9	10
Synpo	Synaptopodin OS=Mus musculus OX=10090 GN=Synpo PE=1 SV=1	44	141	92	101
Alyref	THO complex subunit 4 OS=Mus musculus OX=10090 GN=Alyref PE=1 SV=3	29	20	31	26
Rps24	40S ribosomal protein S24 OS=Mus musculus OX=10090 GN=Rps24 PE=1 SV=1	37	29	37	36
Paat	ATPase PAAT OS=Mus musculus OX=10090 GN=Paat PE=2 SV=1	3	3	7	6
Ddx50	ATP-dependent RNA helicase DDX50 OS=Mus musculus OX=10090 GN=Ddx50 PE=2 SV=1	7	4	9	9
Ctnnbl1	Beta-catenin-like protein 1 OS=Mus musculus OX=10090 GN=Ctnnbl1 PE=1 SV=1	6	4	10	7
Cdkn2aip	CDKN2A-interacting protein OS=Mus musculus OX=10090 GN=Cdkn2aip PE=1 SV=1	4	2	6	7
Cstf1	Cleavage stimulation factor subunit 1 OS=Mus musculus OX=10090 GN=Cstf1 PE=1 SV=1	6	5	11	7
Coro1b	Coronin-1B OS=Mus musculus OX=10090 GN=Coro1b PE=1 SV=1	22	7	20	16
Atf7	Cyclic AMP-dependent transcription factor ATF-7 OS=Mus musculus OX=10090 GN=Atf7 PE=1 SV=1	2	2	5	6
Eef1g	Elongation factor 1-gamma OS=Mus musculus OX=10090 GN=Eef1g PE=1 SV=3	23	12	21	21
Exosc4	Exosome complex component RRP41 OS=Mus musculus OX=10090 GN=Exosc4 PE=1 SV=3	2	1	6	4
Lrpprc	Leucine-rich PPR motif-containing protein mitochondrial OS=Mus musculus OX=10090 GN=Lrpprc PE=1 SV=2	10	4	14	7
Snu13	NHP2-like protein 1 OS=Mus musculus OX=10090 GN=Snu13 PE=1 SV=4	2	5	6	8
Nvl	Nuclear valosin-containing protein-like OS=Mus musculus OX=10090 GN=Nvl PE=1 SV=1	8	11	14	12
Rbm22	Pre-mRNA-splicing factor RBM22 OS=Mus musculus OX=10090 GN=Rbm22 PE=1 SV=1	7	7	7	14
Emg1	Ribosomal RNA small subunit methyltransferase NEP1 OS=Mus musculus OX=10090 GN=Emg1 PE=1 SV=1	16	7	14	16
Snrpd2	Small nuclear ribonucleoprotein Sm D2 OS=Mus musculus OX=10090 GN=Snrpd2 PE=1 SV=1	30	24	34	27
Snx9	Sorting nexin-9 OS=Mus musculus OX=10090 GN=Snx9 PE=1 SV=1	4	2	8	5
Cwc15	Spliceosome-associated protein CWC15 homolog OS=Mus musculus OX=10090 GN=Cwc15 PE=1 SV=1	8	3	8	10
Sf3a1	Splicing factor 3A subunit 1 OS=Mus musculus OX=10090 GN=Sf3a1 PE=1 SV=1	32	18	30	27
Scaf4	SR-related and CTD-associated factor 4 OS=Mus musculus OX=10090 GN=Scaf4 PE=1 SV=1	2	1	6	4
Tbl2	Transducin beta-like protein 2 OS=Mus musculus OX=10090 GN=Tbl2 PE=1 SV=2	3	1	6	5
Rpl22	60S ribosomal protein L22 OS=Mus musculus OX=10090 GN=Rpl22 PE=1 SV=2	27	19	29	23
Banf1	Barrier-to-autointegration factor OS=Mus musculus OX=10090 GN=Banf1 PE=1 SV=1	7	27	19	21
Dsp	Desmoplakin OS=Mus musculus OX=10090 GN=Dsp PE=1 SV=1	10	2	14	4
Magt1	Dolichyl-diphosphooligosaccharide--protein glycosyltransferase subunit MAGT1 OS=Mus musculus OX=10090 GN=Magt1 PE=1 SV=1	4	5	8	7
Esf1	ESF1 homolog OS=Mus musculus OX=10090 GN=Esf1 PE=1 SV=1	7	5	10	8
Grwd1	Glutamate-rich WD repeat-containing protein 1 OS=Mus musculus OX=10090 GN=Grwd1 PE=1 SV=2	15	14	19	16
Golph3	Golgi phosphoprotein 3 OS=Mus musculus OX=10090 GN=Golph3 PE=1 SV=1	1	1	3	5
Gnl3	Guanine nucleotide-binding protein-like 3 OS=Mus musculus OX=10090 GN=Gnl3 PE=1 SV=2	6	6	8	10
Dlx6	Homeobox protein DLX-6 (Fragment) OS=Mus musculus OX=10090 GN=Dlx6 PE=1 SV=1	1	1	4	4
Mybbp1a	Myb-binding protein 1A OS=Mus musculus OX=10090 GN=Mybbp1a PE=1 SV=2	98	108	112	100
Noc2l	Nucleolar complex protein 2 homolog OS=Mus musculus OX=10090 GN=Noc2l PE=1 SV=1	5	10	12	9
Pak1ip1	p21-activated protein kinase-interacting protein 1 OS=Mus musculus OX=10090 GN=Pak1ip1 PE=1 SV=2	9	9	13	11
Ddx56	Probable ATP-dependent RNA helicase DDX56 OS=Mus musculus OX=10090 GN=Ddx56 PE=2 SV=1	8	8	9	13
Fam207a	Protein FAM207A (Fragment) OS=Mus musculus OX=10090 GN=Fam207a PE=1 SV=1	1	3	5	5
Mak16	Protein MAK16 homolog OS=Mus musculus OX=10090 GN=Mak16 PE=1 SV=1	4	6	8	8
Suclg1	Succinate--CoA ligase [ADP/GDP-forming] subunit alpha mitochondrial OS=Mus musculus OX=10090 GN=Suclg1 PE=1 SV=4	3	1	5	5
Nudt16l1	Tudor-interacting repair regulator protein OS=Mus musculus OX=10090 GN=Nudt16l1 PE=1 SV=2	11	1	9	9
Ywhaz	14-3-3 protein zeta/delta OS=Mus musculus OX=10090 GN=Ywhaz PE=1 SV=1	54	32	47	44
Rps23	40S ribosomal protein S23 OS=Mus musculus OX=10090 GN=Rps23 PE=1 SV=3	23	14	20	22
Rpl11	60S ribosomal protein L11 OS=Mus musculus OX=10090 GN=Rpl11 PE=1 SV=4	31	34	35	35
Ahcy	Adenosylhomocysteinase OS=Mus musculus OX=10090 GN=Ahcy PE=1 SV=3	1	1	4	3
Nudt21	Cleavage and polyadenylation specificity factor subunit 5 OS=Mus musculus OX=10090 GN=Nudt21 PE=1 SV=1	16	9	16	14
Cpsf7	Cleavage and polyadenylation specificity factor subunit 7 OS=Mus musculus OX=10090 GN=Cpsf7 PE=1 SV=2	3	4	5	7
Ccdc86	Coiled-coil domain-containing protein 86 OS=Mus musculus OX=10090 GN=Ccdc86 PE=1 SV=2	1	1	2	5
Eif3e	Eukaryotic translation initiation factor 3 subunit E OS=Mus musculus OX=10090 GN=Eif3e PE=1 SV=1	8	4	9	8
Eif3i	Eukaryotic translation initiation factor 3 subunit I OS=Mus musculus OX=10090 GN=Eif3i PE=1 SV=1	9	2	7	9
Eif3l	Eukaryotic translation initiation factor 3 subunit L OS=Mus musculus OX=10090 GN=Eif3l PE=1 SV=1	12	5	11	11
Fn1	Fibronectin OS=Mus musculus OX=10090 GN=Fn1 PE=1 SV=1	4	1	5	5
H2bu1	Histone H2B type 3-B OS=Mus musculus OX=10090 GN=H2bu1 PE=1 SV=3	23	101	62	67
Krt2	Keratin type II cytoskeletal 2 epidermal OS=Mus musculus OX=10090 GN=Krt2 PE=1 SV=1	76	44	65	60
Lmo7	LIM domain only 7 OS=Mus musculus OX=10090 GN=Lmo7 PE=1 SV=1	116	191	159	153
Gnl2	Nucleolar GTP-binding protein 2 OS=Mus musculus OX=10090 GN=Gnl2 PE=1 SV=2	7	7	9	10
Phf5a	PHD finger-like domain-containing protein 5A OS=Mus musculus OX=10090 GN=Phf5a PE=1 SV=1	3	2	5	5
Parp1	Poly [ADP-ribose] polymerase OS=Mus musculus OX=10090 GN=Parp1 PE=1 SV=1	81	54	82	58
Bcas2	Pre-mRNA-splicing factor SPF27 OS=Mus musculus OX=10090 GN=Bcas2 PE=1 SV=1	10	8	12	11
Prc1	Protein regulator of cytokinesis 1 OS=Mus musculus OX=10090 GN=Prc1 PE=1 SV=1	14	25	24	20
Gulp1	PTB domain-containing engulfment adapter protein 1 OS=Mus musculus OX=10090 GN=Gulp1 PE=1 SV=1	2	1	6	2
Racgap1	Rac GTPase-activating protein 1 OS=Mus musculus OX=10090 GN=Racgap1 PE=1 SV=1	3	13	13	8
Reps1	RalBP1-associated Eps domain-containing protein 1 OS=Mus musculus OX=10090 GN=Reps1 PE=1 SV=1	8	5	7	11
RTRAF	RNA transcription translation and transport factor protein OS=Mus musculus OX=10090 GN=RTRAF PE=1 SV=1	54	70	71	58
Spop	Speckle-type POZ protein OS=Mus musculus OX=10090 GN=Spop PE=1 SV=1	3	5	7	6
Spats2	Spermatogenesis-associated serine-rich protein 2 OS=Mus musculus OX=10090 GN=Spats2 PE=1 SV=1	11	11	13	14
Smn1	Survival motor neuron protein OS=Mus musculus OX=10090 GN=Smn1 PE=1 SV=1	2	1	4	4
Smarcc1	SWI/SNF complex subunit SMARCC1 OS=Mus musculus OX=10090 GN=Smarcc1 PE=1 SV=1	12	7	14	10
Sox6	Transcription factor SOX-6 OS=Mus musculus OX=10090 GN=Sox6 PE=1 SV=2	4	1	6	4
Snrpc	U1 small nuclear ribonucleoprotein C OS=Mus musculus OX=10090 GN=Snrpc PE=1 SV=1	6	3	7	7
Snrpb2	U2 small nuclear ribonucleoprotein B'' OS=Mus musculus OX=10090 GN=Snrpb2 PE=1 SV=1	7	9	10	11
Ywhah	14-3-3 protein eta OS=Mus musculus OX=10090 GN=Ywhah PE=1 SV=2	25	19	28	20
Ddx39a	ATP-dependent RNA helicase DDX39A OS=Mus musculus OX=10090 GN=Ddx39a PE=1 SV=1	27	14	28	17
Macroh2a1	Core histone macro-H2A.1 OS=Mus musculus OX=10090 GN=Macroh2a1 PE=1 SV=3	5	27	18	18
Dhx16	DEAH (Asp-Glu-Ala-His) box polypeptide 16 OS=Mus musculus OX=10090 GN=Dhx16 PE=1 SV=1	3	3	5	5
Rlim	E3 ubiquitin-protein ligase RLIM OS=Mus musculus OX=10090 GN=Rlim PE=1 SV=2	3	3	5	5
Gemin2	Gem-associated protein 2 OS=Mus musculus OX=10090 GN=Gemin2 PE=2 SV=1	5	2	5	6
Kank1	KN motif and ankyrin repeat domains 1 OS=Mus musculus OX=10090 GN=Kank1 PE=1 SV=1	3	3	5	5
Mta3	Metastasis-associated protein MTA3 OS=Mus musculus OX=10090 GN=Mta3 PE=1 SV=1	8	4	9	7
Nfia	Nuclear factor 1 (Fragment) OS=Mus musculus OX=10090 GN=Nfia PE=1 SV=1	6	3	7	6
Nol10	Nucleolar protein 10 OS=Mus musculus OX=10090 GN=Nol10 PE=2 SV=1	8	7	7	12
Gm5269	Predicted gene 5269 OS=Mus musculus OX=10090 GN=Gm5269 PE=4 SV=1	18	14	18	18
Lsm12	Protein LSM12 homolog OS=Mus musculus OX=10090 GN=Lsm12 PE=1 SV=1	14	34	27	25
Rcc1	Regulator of chromosome condensation OS=Mus musculus OX=10090 GN=Rcc1 PE=1 SV=1	9	23	18	18
Msi2	RNA-binding protein Musashi homolog 2 OS=Mus musculus OX=10090 GN=Msi2 PE=1 SV=1	11	6	9	12
Srbd1	S1 RNA-binding domain-containing protein 1 OS=Mus musculus OX=10090 GN=Srbd1 PE=1 SV=1	9	5	10	8
Trmt2a	tRNA (uracil-5-)-methyltransferase homolog A OS=Mus musculus OX=10090 GN=Trmt2a PE=1 SV=1	6	3	8	5
Utp25	UTP25 small subunit processome component OS=Mus musculus OX=10090 GN=Utp25 PE=1 SV=1	8	5	13	4
Rplp0	60S acidic ribosomal protein P0 OS=Mus musculus OX=10090 GN=Rplp0 PE=1 SV=3	109	75	96	91
Rplp2	60S acidic ribosomal protein P2 OS=Mus musculus OX=10090 GN=Rplp2 PE=1 SV=3	36	11	26	24
Rpl18	60S ribosomal protein L18 OS=Mus musculus OX=10090 GN=Rpl18 PE=1 SV=3	45	32	43	37
Arpc1a	Actin-related protein 2/3 complex subunit 1A OS=Mus musculus OX=10090 GN=Arpc1a PE=1 SV=1	33	23	31	28
Cad	Aspartate carbamoyltransferase OS=Mus musculus OX=10090 GN=Cad PE=1 SV=1	25	7	21	14
Ckap4	Cytoskeleton-associated protein 4 OS=Mus musculus OX=10090 GN=Ckap4 PE=1 SV=2	8	4	7	8
Polrmt	DNA-directed RNA polymerase mitochondrial OS=Mus musculus OX=10090 GN=Polrmt PE=1 SV=1	7	8	9	9
Gtf2h2	General transcription factor IIH subunit 2 OS=Mus musculus OX=10090 GN=Gtf2h2 PE=1 SV=1	3	2	5	3
Dkc1	H/ACA ribonucleoprotein complex subunit DKC1 OS=Mus musculus OX=10090 GN=Dkc1 PE=1 SV=4	13	29	21	24
Hdgfl2	Hepatoma-derived growth factor-related protein 2 OS=Mus musculus OX=10090 GN=Hdgfl2 PE=1 SV=1	7	2	7	5
Hnrnpf	Heterogeneous nuclear ribonucleoprotein F OS=Mus musculus OX=10090 GN=Hnrnpf PE=1 SV=3	137	135	138	137
Hmgb2	High mobility group protein B2 OS=Mus musculus OX=10090 GN=Hmgb2 PE=1 SV=3	8	4	12	3
[truncated: 387 more rows]

## Sheet: all_diff_gene
logFC	logCPM	LR	PValue	FDR	log10FDR	DEG
Tubb2b	10.8229	10.3316	124.435	6.76e-29	6.97e-26	25.1568	Up
Ubc	10.7207	10.2341	123.986	8.48e-29	6.97e-26	25.1568	Up
Ubb	10.7207	10.2341	123.921	8.77e-29	6.97e-26	25.1568	Up
Plxna1	10.533	10.0554	120.881	4.06e-28	1.97e-25	24.7055	Up
Epha3	10.5021	10.0261	120.849	4.12e-28	1.97e-25	24.7055	Up
Hspa1b	10.4695	9.99519	119.327	8.88e-28	3.53e-25	24.4522	Up
Tuba4a	10.4012	9.93062	118.298	1.49e-27	5.08e-25	24.2941	Up
Fat1	10.182	9.72386	114.018	1.29e-26	3.85e-24	23.4145	Up
Flna	10.0179	9.56986	112.857	2.32e-26	5.53e-24	23.2573	Up
Unc5c	9.96519	9.52041	112.856	2.32e-26	5.53e-24	23.2573	Up
Plxnd1	9.91753	9.47593	112.34	3.01e-26	6.17e-24	23.2097	Up
Bmpr2	9.90769	9.46677	112.28	3.1e-26	6.17e-24	23.2097	Up
Notch2	9.40361	9.0003	111.168	5.43e-26	9.97e-24	23.0013	Up
Itch	9.80793	9.37382	110.74	6.75e-26	1.15e-23	22.9393	Up
Nrp2	9.654	9.23108	108.256	2.36e-25	3.76e-23	22.4248	Up
Nedd4l	9.33356	8.9361	107.12	4.19e-25	6.25e-23	22.2041	Up
Plxnb2	6.82031	11.0866	106.842	4.82e-25	6.76e-23	22.1701	Up
Slc12a7	7.47781	9.67317	106.465	5.83e-25	7.73e-23	22.1118	Up
Hgs	9.30367	8.90878	106.316	6.29e-25	7.89e-23	22.1029	Up
Ptprs	7.02888	10.9771	105.35	1.02e-24	1.21e-22	21.9172	Up
Ptpra	9.28209	8.88905	105.272	1.06e-24	1.21e-22	21.9172	Up
Ddr2	7.14095	9.3604	101.881	5.9e-24	6.29e-22	21.2013	Up
Ssrp1	9.27942	8.8867	101.825	6.07e-24	6.29e-22	21.2013	Up
Ddr1	9.21452	8.82736	101.406	7.49e-24	7.45e-22	21.1278	Up
Ptprd	7.07065	9.30742	100.312	1.3e-23	1.19e-21	20.9245	Up
Atp7a	9.14911	8.76786	99.9464	1.57e-23	1.38e-21	20.8601	Up
Daam2	9.09829	8.72171	98.5391	3.19e-23	2.71e-21	20.567	Up
Stub1	9.1083	8.73078	98.1992	3.78e-23	3.11e-21	20.5072	Up
Usp8	8.99427	8.62753	97.0718	6.69e-23	5.29e-21	20.2765	Up
Wwp1	8.9934	8.62672	97.0156	6.88e-23	5.29e-21	20.2765	Up
Adgrl2	9.03058	8.66035	96.2814	9.97e-23	7.43e-21	20.129	Up
Vamp7	9.04884	8.67687	96.1287	1.08e-22	7.78e-21	20.109	Up
Il6st	8.79906	8.45185	95.753	1.3e-22	9.13e-21	20.0395	Up
Bcap31	8.87076	8.51624	95.6793	1.35e-22	9.21e-21	20.0357	Up
Stam2	9.00531	8.63749	94.5268	2.42e-22	1.6e-20	19.7959	Up
Rnf130	8.73535	8.39486	93.1725	4.79e-22	3.09e-20	19.51	Up
Rnf149	8.7231	8.3837	92.4177	7.02e-22	4.4e-20	19.3565	Up
Lrp12	8.51071	8.19472	89.048	3.85e-21	2.36e-19	18.6271	Up
Tmem59	8.60995	8.28305	88.3568	5.47e-21	3.26e-19	18.4868	Up
Marchf7	8.74864	8.40684	87.9691	6.65e-21	3.87e-19	18.4123	Up
Steap3	6.34799	8.63895	87.0366	1.07e-20	6.05e-19	18.2182	Up
Erbb3	8.56069	8.2391	86.8475	1.17e-20	6.5e-19	18.1871	Up
Tgfbr2	8.47315	8.162	86.6081	1.32e-20	7.05e-19	18.1518	Up
Pi4k2b	8.47315	8.162	86.5539	1.36e-20	7.05e-19	18.1518	Up
Daam1	5.4309	9.46366	86.5526	1.36e-20	7.05e-19	18.1518	Up
Samm50	5.30787	8.99492	86.3965	1.47e-20	7.47e-19	18.1267	Up
Acvr2a	8.45909	8.1492	86.1357	1.68e-20	8.35e-19	18.0783	Up
Mmp14	8.53762	8.21908	85.9511	1.84e-20	8.98e-19	18.0467	Up
Ptprm	8.46015	8.15057	85.6844	2.11e-20	1.01e-18	17.9957	Up
Scamp3	8.52608	8.20912	85.3909	2.45e-20	1.15e-18	17.9393	Up
Tm9sf3	8.44596	8.13767	85.2753	2.6e-20	1.19e-18	17.9245	Up
Ankrd28	8.46043	8.15092	85.1789	2.73e-20	1.23e-18	17.9101	Up
Slc4a2	8.44675	8.1387	84.9822	3.01e-20	1.33e-18	17.8761	Up
Ptprf	6.11487	8.43854	84.6477	3.57e-20	1.55e-18	17.8097	Up
Kirrel1	5.24173	9.30344	84.3781	4.09e-20	1.74e-18	17.7595	Up
Mgrn1	8.21538	7.93528	79.5106	4.8e-19	2.01e-17	16.6968	Up
Laptm4a	8.34881	8.05189	79.2817	5.39e-19	2.21e-17	16.6556	Up
Capn6	8.35082	8.0544	79.2269	5.54e-19	2.24e-17	16.6498	Up
Stx12	8.3209	8.02772	79.0346	6.1e-19	2.43e-17	16.6144	Up
Tmem176b	6.0656	12.9787	78.7809	6.94e-19	2.7e-17	16.5686	Up
Abca3	8.30563	8.014	78.7604	7.01e-19	2.7e-17	16.5686	Up
Pi4k2a	8.32175	8.02881	78.5598	7.76e-19	2.94e-17	16.5317	Up
Acvrl1	8.20014	7.92253	78.5162	7.93e-19	2.96e-17	16.5287	Up
Atp2c1	8.24525	7.96078	77.492	1.33e-18	4.89e-17	16.3107	Up
Gnptab	8.2754	7.98728	77.021	1.69e-18	6.11e-17	16.214	Up
Chp1	8.18486	7.90966	76.138	2.65e-18	9.28e-17	16.0325	Up
Cyp20a1	8.15144	7.87962	75.6293	3.42e-18	1.18e-16	15.9281	Up
Gpd2	8.18517	7.91004	75.2972	4.05e-18	1.38e-16	15.8601	Up
Galnt1	8.13511	7.86554	74.8726	5.02e-18	1.69e-16	15.7721	Up
Pip4p2	8.16897	7.89588	74.705	5.47e-18	1.79e-16	15.7471	Up
Kidins220	8.06748	7.80689	74.6952	5.49e-18	1.79e-16	15.7471	Up
Stx6	8.06775	7.80769	74.6536	5.61e-18	1.81e-16	15.7423	Up
Cmip	8.06809	7.8085	73.8981	8.23e-18	2.58e-16	15.5884	Up
Slc4a7	8.08458	7.82159	73.4504	1.03e-17	3.2e-16	15.4949	Up
Ephb4	8.10076	7.83494	72.4772	1.69e-17	5.17e-16	15.2865	Up
Abcb1b	8.01436	7.76056	71.976	2.18e-17	6.58e-16	15.1818	Up
Stxbp2	8.034	7.77944	69.2924	8.49e-17	2.5e-15	14.6021	Up
Stam	7.97896	7.7317	68.9341	1.02e-16	2.96e-15	14.5287	Up
Atp6v0d1	7.95929	7.71304	68.5578	1.23e-16	3.54e-15	14.451	Up
Ubl3	7.96031	7.71555	68.3006	1.4e-16	3.99e-15	14.399	Up
Acvr1	7.92182	7.6814	67.4956	2.11e-16	5.87e-15	14.2314	Up
Slc3a2	7.92151	7.68055	67.3281	2.3e-16	6.23e-15	14.2055	Up
Atp2b1	5.50207	7.89709	67.2823	2.35e-16	6.3e-15	14.2007	Up
Lrrc8a	7.9026	7.66508	66.9573	2.77e-16	7.27e-15	14.1385	Up
Chsy3	7.90274	7.66551	66.9285	2.82e-16	7.3e-15	14.1367	Up
Tm9sf2	7.92247	7.6831	66.8861	2.88e-16	7.38e-15	14.1319	Up
Stxbp3	7.90289	7.66594	66.7759	3.04e-16	7.72e-15	14.1124	Up
Ecpas	7.88326	7.64899	66.1709	4.13e-16	1.02e-14	13.9914	Up
Syt11	7.88299	7.64813	66.1672	4.14e-16	1.02e-14	13.9914	Up
Brox	7.88326	7.64899	66.1243	4.23e-16	1.03e-14	13.9872	Up
Rell1	7.88268	7.64727	65.6833	5.3e-16	1.28e-14	13.8928	Up
Igkv1-117	8.71126	8.37193	64.9932	7.52e-16	1.79e-14	13.7471	Up
Plxna2	7.84336	7.6149	64.2558	1.09e-15	2.58e-14	13.5884	Up
	7.80216	7.57948	63.6558	1.48e-15	3.46e-14	13.4609	Up
Apold1	7.80206	7.57904	63.6048	1.52e-15	3.52e-14	13.4535	Up
Bzw1	5.41558	7.82697	63.431	1.66e-15	3.77e-14	13.4237	Up
Pcdhgb2	7.78122	7.56187	63.2357	1.83e-15	4.09e-14	13.3883	Up
Met	7.78122	7.56187	63.2178	1.85e-15	4.09e-14	13.3883	Up
Bmpr1a	7.82307	7.59775	63.1679	1.9e-15	4.15e-14	13.382	Up
Tnpo1	7.82324	7.59819	62.9291	2.14e-15	4.65e-14	13.3325	Up
Mfap3	7.78097	7.56053	62.9055	2.17e-15	4.66e-14	13.3316	Up
Erbin	7.80165	7.5777	62.7684	2.33e-15	4.95e-14	13.3054	Up
Arrdc3	7.75991	7.54358	62.3042	2.94e-15	6.21e-14	13.2069	Up
Sec63	7.75999	7.54403	62.2347	3.05e-15	6.34e-14	13.1979	Up
Aup1	7.73812	7.52412	61.2687	4.98e-15	1.01e-13	12.9957	Up
Scamp1	7.71638	7.50669	61.2169	5.11e-15	1.02e-13	12.9914	Up
Plxnb1	7.7163	7.50578	61.1045	5.41e-15	1.08e-13	12.9666	Up
Tgfbr1	7.71647	7.50761	61.0668	5.52e-15	1.09e-13	12.9626	Up
Abcc4	7.73799	7.52367	60.9944	5.72e-15	1.12e-13	12.9508	Up
Lrp10	7.73857	7.5264	60.9023	6e-15	1.16e-13	12.9355	Up
H1-5	7.78257	7.56456	60.0651	9.18e-15	1.75e-13	12.757	Up
Ccdc47	7.67151	7.46878	59.2299	1.4e-14	2.63e-13	12.58	Up
Atp13a3	7.67141	7.46785	59.0281	1.55e-14	2.9e-13	12.5376	Up
Atrn	7.67131	7.46738	58.7549	1.79e-14	3.3e-13	12.4815	Up
Tmem176a	7.64857	7.44965	58.1169	2.47e-14	4.53e-13	12.3439	Up
Comtd1	7.64841	7.44824	58.0958	2.5e-14	4.55e-13	12.342	Up
Ggt7	7.6252	7.42977	57.198	3.94e-14	7.12e-13	12.1475	Up
Zw10	7.6252	7.42977	57.1681	4e-14	7.17e-13	12.1445	Up
Itm2c	7.62533	7.43071	57.018	4.32e-14	7.63e-13	12.1175	Up
Plxna4	5.21205	7.65424	56.6333	5.25e-14	9.14e-13	12.0391	Up
Adam10	7.6015	7.41007	56.3125	6.18e-14	1.06e-12	11.9747	Up
Zdhhc20	7.60145	7.4096	56.289	6.26e-14	1.07e-12	11.9706	Up
Wdfy1	7.60151	7.41007	56.2375	6.42e-14	1.09e-12	11.9626	Up
Cip2a	7.60139	7.40912	56.1442	6.73e-14	1.13e-12	11.9469	Up
Cnnm3	7.60138	7.40912	56.1062	6.87e-14	1.15e-12	11.9393	Up
Spred1	7.60158	7.41055	56.0535	7.05e-14	1.17e-12	11.9318	Up
Gaa	7.5773	7.38912	55.3954	9.86e-14	1.62e-12	11.7905	Up
Scfd1	7.57714	7.38816	55.0445	1.18e-13	1.92e-12	11.7167	Up
Snx27	7.6021	7.41198	54.8984	1.27e-13	2.06e-12	11.6861	Up
Abcc1	7.5528	7.36882	54.5141	1.54e-13	2.49e-12	11.6038	Up
Chchd6	7.55274	7.36834	54.4438	1.6e-13	2.56e-12	11.5918	Up
Ipo7	5.13091	7.5817	54.1687	1.84e-13	2.93e-12	11.5331	Up
Plekhh3	7.52776	7.34723	53.5164	2.56e-13	4.05e-12	11.3925	Up
Smpd4	7.52793	7.3487	53.4328	2.68e-13	4.2e-12	11.3768	Up
Cers2	7.50249	7.32727	52.6625	3.96e-13	6.12e-12	11.2132	Up
Atp1a4	7.50244	7.32678	52.6472	3.99e-13	6.12e-12	11.2132	Up
Slc12a9	7.50244	7.32678	52.6409	4e-13	6.12e-12	11.2132	Up
Tmem30a	7.47662	7.30551	51.5577	6.95e-13	1.04e-11	10.983	Up
Sptlc1	7.47648	7.30451	51.3954	7.55e-13	1.13e-11	10.9469	Up
Rab1b	7.45027	7.28339	50.783	1.03e-12	1.52e-11	10.8182	Up
Il1rap	7.45027	7.28339	50.752	1.05e-12	1.53e-11	10.8153	Up
Rnf19a	7.45014	7.28239	50.6072	1.13e-12	1.64e-11	10.7852	Up
Iars1	7.42348	7.26141	50.3093	1.31e-12	1.89e-11	10.7235	Up
Tnpo3	7.42346	7.26091	50.2453	1.36e-12	1.94e-11	10.7122	Up
Pisd	7.42346	7.26091	50.2113	1.38e-12	1.96e-11	10.7077	Up
Gm20671	7.42346	7.26091	50.1907	1.4e-12	1.97e-11	10.7055	Up
Tnfrsf1a	7.42351	7.26192	50.173	1.41e-12	1.97e-11	10.7055	Up
Tmx4	7.42355	7.26243	50.085	1.47e-12	2.05e-11	10.6882	Up
Slc6a6	7.44984	7.28139	50.057	1.49e-12	2.07e-11	10.684	Up
Napa	7.39618	7.23907	49.1497	2.37e-12	3.25e-11	10.4881	Up
Stx7	7.39618	7.23907	49.1486	2.37e-12	3.25e-11	10.4881	Up
Stard3	7.39604	7.23754	48.916	2.67e-12	3.6e-11	10.4437	Up
Csnk1e	7.39603	7.23754	48.8778	2.72e-12	3.65e-11	10.4377	Up
Abcc5	7.36825	7.21481	48.2317	3.79e-12	5.05e-11	10.2967	Up
Nup210	7.42243	7.25838	48.0753	4.1e-12	5.43e-11	10.2652	Up
Tmem63b	7.33999	7.19323	47.1215	6.67e-12	8.7e-11	10.0605	Up
Ifitm3	7.31095	7.16919	46.6693	8.4e-12	1.08e-10	9.96658	Up
Gja1	7.31095	7.16866	46.6693	8.4e-12	1.08e-10	9.96658	Up
Cnnm4	7.31095	7.16866	46.6693	8.4e-12	1.08e-10	9.96658	Up
Igsf3	7.2814	7.14471	45.7175	1.37e-11	1.72e-10	9.76447	Up
Ankrd46	7.25122	7.12085	44.7656	2.22e-11	2.69e-10	9.57025	Up
Gnptg	7.25122	7.12085	44.7656	2.22e-11	2.69e-10	9.57025	Up
Atp6v1h	7.25122	7.12032	44.7656	2.22e-11	2.69e-10	9.57025	Up
Neto2	7.25122	7.11979	44.7656	2.22e-11	2.69e-10	9.57025	Up
Vps35	7.25122	7.11979	44.7656	2.22e-11	2.69e-10	9.57025	Up
Aplp2	7.25122	7.11872	44.7656	2.22e-11	2.69e-10	9.57025	Up
Rhou	7.25122	7.12085	44.7574	2.23e-11	2.69e-10	9.57025	Up
Kit	7.2204	7.09547	43.8136	3.61e-11	4.16e-10	9.38091	Up
Ubr4	7.2204	7.09494	43.8136	3.61e-11	4.16e-10	9.38091	Up
Tbc1d15	7.2204	7.09494	43.8136	3.61e-11	4.16e-10	9.38091	Up
Il17ra	7.2204	7.0944	43.8136	3.61e-11	4.16e-10	9.38091	Up
Rala	7.2204	7.0944	43.8136	3.61e-11	4.16e-10	9.38091	Up
Ralb	7.2204	7.0944	43.8136	3.61e-11	4.16e-10	9.38091	Up
Neo1	7.2204	7.09386	43.8136	3.61e-11	4.16e-10	9.38091	Up
Mpst	7.2204	7.09332	43.8136	3.61e-11	4.16e-10	9.38091	Up
Ezr	7.2204	7.09224	43.8136	3.61e-11	4.16e-10	9.38091	Up
Rab7a	7.1889	7.07016	42.8616	5.88e-11	6.7e-10	9.17393	Up
Ankrd13a	7.15671	7.04435	41.9095	9.56e-11	1.07e-09	8.97062	Up
Cdh19	7.15671	7.04381	41.9095	9.56e-11	1.07e-09	8.97062	Up
Far1	7.15671	7.04271	41.9095	9.56e-11	1.07e-09	8.97062	Up
Ldlr	7.15671	7.04271	41.9095	9.56e-11	1.07e-09	8.97062	Up
Ifnar1	7.15671	7.04161	41.9095	9.56e-11	1.07e-09	8.97062	Up
Eng	7.12378	7.01638	40.9573	1.56e-10	1.68e-09	8.77469	Up
Ndufs1	7.12378	7.01638	40.9573	1.56e-10	1.68e-09	8.77469	Up
Clptm1	7.12377	7.01583	40.9573	1.56e-10	1.68e-09	8.77469	Up
Kcmf1	7.12377	7.01527	40.9573	1.56e-10	1.68e-09	8.77469	Up
Tmem168	7.12377	7.01472	40.9573	1.56e-10	1.68e-09	8.77469	Up
Ubr2	7.12377	7.01361	40.9573	1.56e-10	1.68e-09	8.77469	Up
Galnt2	7.09008	6.99176	40.0052	2.53e-10	2.63e-09	8.58004	Up
Lrp5	7.09007	6.98952	40.0052	2.53e-10	2.63e-09	8.58004	Up
Dcbld2	7.09007	6.98841	40.0051	2.53e-10	2.63e-09	8.58004	Up
Stom	7.09007	6.98841	40.0051	2.53e-10	2.63e-09	8.58004	Up
Timm23	7.05557	6.96212	39.0529	4.12e-10	4.17e-09	8.37986	Up
Adcy3	7.05557	6.96099	39.0529	4.12e-10	4.17e-09	8.37986	Up
Adcy7	7.05557	6.96099	39.0529	4.12e-10	4.17e-09	8.37986	Up
Rpa2	7.05557	6.96099	39.0529	4.12e-10	4.17e-09	8.37986	Up
Vac14	7.05557	6.96042	39.0529	4.12e-10	4.17e-09	8.37986	Up
Asph	7.02021	6.93527	38.1007	6.72e-10	6.41e-09	8.19314	Up
Bag5	7.02021	6.9347	38.1006	6.72e-10	6.41e-09	8.19314	Up
Atp5pd	7.02021	6.93356	38.1006	6.72e-10	6.41e-09	8.19314	Up
Tomm40	7.02021	6.93356	38.1006	6.72e-10	6.41e-09	8.19314	Up
Slc38a2	7.02021	6.93299	38.1006	6.72e-10	6.41e-09	8.19314	Up
Atrnl1	7.02021	6.93242	38.1006	6.72e-10	6.41e-09	8.19314	Up
Bace2	7.02021	6.93242	38.1006	6.72e-10	6.41e-09	8.19314	Up
Hvcn1	7.02021	6.93242	38.1006	6.72e-10	6.41e-09	8.19314	Up
Tmx1	7.02021	6.93185	38.1006	6.72e-10	6.41e-09	8.19314	Up
Alg2	6.98397	6.90555	37.1483	1.09e-09	9.97e-09	8.0013	Up
Epha7	6.98397	6.90555	37.1483	1.09e-09	9.97e-09	8.0013	Up
Ca14	6.98397	6.90498	37.1483	1.09e-09	9.97e-09	8.0013	Up
Ifitm2	6.98397	6.9044	37.1483	1.09e-09	9.97e-09	8.0013	Up
Tmcc2	6.98397	6.9044	37.1483	1.09e-09	9.97e-09	8.0013	Up
Ugcg	6.98397	6.90382	37.1483	1.09e-09	9.97e-09	8.0013	Up
Stt3a	6.98397	6.90382	37.1483	1.09e-09	9.97e-09	8.0013	Up
Slc4a8	6.98397	6.90382	37.1483	1.09e-09	9.97e-09	8.0013	Up
Antxr2	6.9468	6.87576	36.196	1.78e-09	1.56e-08	7.80688	Up
Cerk	6.9468	6.87518	36.196	1.78e-09	1.56e-08	7.80688	Up
Eno2	6.9468	6.8746	36.196	1.78e-09	1.56e-08	7.80688	Up
Igsf8	6.9468	6.8746	36.196	1.78e-09	1.56e-08	7.80688	Up
Agk	6.9468	6.87402	36.196	1.78e-09	1.56e-08	7.80688	Up
Dync1li1	6.9468	6.87402	36.196	1.78e-09	1.56e-08	7.80688	Up
Insr	6.9468	6.87402	36.196	1.78e-09	1.56e-08	7.80688	Up
Slc7a1	6.9468	6.87344	36.196	1.78e-09	1.56e-08	7.80688	Up
Tm9sf4	6.9468	6.87344	36.196	1.78e-09	1.56e-08	7.80688	Up
Adam17	6.90864	6.84531	35.2436	2.91e-09	2.44e-08	7.61261	Up
Atp11a	6.90864	6.84531	35.2436	2.91e-09	2.44e-08	7.61261	Up
Slc20a1	6.90864	6.84531	35.2436	2.91e-09	2.44e-08	7.61261	Up
Mreg	6.90864	6.84414	35.2436	2.91e-09	2.44e-08	7.61261	Up
Snx3	6.90864	6.84414	35.2436	2.91e-09	2.44e-08	7.61261	Up
Pld3	6.90864	6.84355	35.2436	2.91e-09	2.44e-08	7.61261	Up
Acsl3	6.90864	6.84355	35.2436	2.91e-09	2.44e-08	7.61261	Up
Ano6	6.86945	6.81535	34.2912	4.75e-09	3.8e-08	7.42022	Up
Tyro3	6.86945	6.81476	34.2912	4.75e-09	3.8e-08	7.42022	Up
Znrf3	6.86945	6.81416	34.2912	4.75e-09	3.8e-08	7.42022	Up
Ankib1	6.86945	6.81357	34.2912	4.75e-09	3.8e-08	7.42022	Up
Pom121	6.86945	6.81357	34.2912	4.75e-09	3.8e-08	7.42022	Up
Tulp4	6.86945	6.81357	34.2912	4.75e-09	3.8e-08	7.42022	Up
Sh3pxd2b	6.86945	6.81298	34.2912	4.75e-09	3.8e-08	7.42022	Up
Gna14	6.82916	6.78349	33.3388	7.74e-09	5.92e-08	7.22768	Up
Ctdspl	6.82916	6.78349	33.3388	7.74e-09	5.92e-08	7.22768	Up
Ube3c	6.82916	6.78349	33.3388	7.74e-09	5.92e-08	7.22768	Up
Lman2	6.82916	6.78349	33.3388	7.74e-09	5.92e-08	7.22768	Up
Gna12	6.82916	6.78289	33.3388	7.74e-09	5.92e-08	7.22768	Up
Pdgfra	6.82916	6.78289	33.3388	7.74e-09	5.92e-08	7.22768	Up
Aaas	6.82916	6.78229	33.3388	7.74e-09	5.92e-08	7.22768	Up
Adam9	6.82916	6.78169	33.3388	7.74e-09	5.92e-08	7.22768	Up
Sgce	6.82916	6.78169	33.3388	7.74e-09	5.92e-08	7.22768	Up
Frk	6.82916	6.78169	33.3388	7.74e-09	5.92e-08	7.22768	Up
Retreg3	6.82916	6.78109	33.3388	7.74e-09	5.92e-08	7.22768	Up
Pds5a	6.82916	6.77989	33.3388	7.74e-09	5.92e-08	7.22768	Up
Itgb1	6.78771	6.75026	32.3864	1.26e-08	9.39e-08	7.02733	Up
Pgrmc2	6.78771	6.75026	32.3864	1.26e-08	9.39e-08	7.02733	Up
Chpf	6.78771	6.74965	32.3864	1.26e-08	9.39e-08	7.02733	Up
Kiaa2013	6.78771	6.74965	32.3864	1.26e-08	9.39e-08	7.02733	Up
Stx8	6.78771	6.74904	32.3864	1.26e-08	9.39e-08	7.02733	Up
Umps	6.78771	6.74904	32.3864	1.26e-08	9.39e-08	7.02733	Up
Mpzl1	6.78771	6.74844	32.3864	1.26e-08	9.39e-08	7.02733	Up
Il10rb	6.74504	6.71805	31.4339	2.06e-08	1.48e-07	6.82974	Up
Igf1r	6.74504	6.71744	31.4339	2.06e-08	1.48e-07	6.82974	Up
Aldh3b1	6.74504	6.71683	31.4339	2.06e-08	1.48e-07	6.82974	Up
Gbf1	6.74504	6.71683	31.4339	2.06e-08	1.48e-07	6.82974	Up
Slc45a2	6.74504	6.71683	31.4339	2.06e-08	1.48e-07	6.82974	Up
Fam210b	6.74504	6.71683	31.4339	2.06e-08	1.48e-07	6.82974	Up
Stxbp1	6.74504	6.71683	31.4339	2.06e-08	1.48e-07	6.82974	Up
Lnpep	6.74504	6.71621	31.4339	2.06e-08	1.48e-07	6.82974	Up
Evc2	6.74504	6.71621	31.4339	2.06e-08	1.48e-07	6.82974	Up
Scamp2	6.74504	6.71621	31.4339	2.06e-08	1.48e-07	6.82974	Up
Slc20a2	6.74504	6.7156	31.4339	2.06e-08	1.48e-07	6.82974	Up
Slc12a4	6.70106	6.68318	30.4815	3.37e-08	2.36e-07	6.62709	Up
Stx4	6.70106	6.68318	30.4815	3.37e-08	2.36e-07	6.62709	Up
Ldlrad3	6.70106	6.68194	30.4815	3.37e-08	2.36e-07	6.62709	Up
Cherp	6.70106	6.6807	30.4815	3.37e-08	2.36e-07	6.62709	Up
Pigs	6.65571	6.64991	29.529	5.51e-08	3.7e-07	6.4318	Up
Adgrg1	6.65571	6.64866	29.529	5.51e-08	3.7e-07	6.4318	Up
Rnf144a	6.65571	6.64866	29.529	5.51e-08	3.7e-07	6.4318	Up
Rnf19b	6.65571	6.64866	29.529	5.51e-08	3.7e-07	6.4318	Up
Acvr1b	6.65571	6.64803	29.529	5.51e-08	3.7e-07	6.4318	Up
Sema4c	6.65571	6.64741	29.529	5.51e-08	3.7e-07	6.4318	Up
Irgm1	6.65571	6.64678	29.529	5.51e-08	3.7e-07	6.4318	Up
Fkbp8	6.60888	6.61449	28.5765	9.01e-08	5.82e-07	6.23508	Up
Ndufa10	6.60888	6.61323	28.5765	9.01e-08	5.82e-07	6.23508	Up
Nup188	6.60888	6.61323	28.5765	9.01e-08	5.82e-07	6.23508	Up
Srebf1	6.60888	6.61323	28.5765	9.01e-08	5.82e-07	6.23508	Up
Snx17	6.60888	6.61259	28.5765	9.01e-08	5.82e-07	6.23508	Up
Ptprk	6.60888	6.61196	28.5765	9.01e-08	5.82e-07	6.23508	Up
Atp1b3	6.60888	6.61196	28.5765	9.01e-08	5.82e-07	6.23508	Up
Evc	6.60888	6.61133	28.5765	9.01e-08	5.82e-07	6.23508	Up
Cpd	6.56048	6.57619	27.624	1.47e-07	9.18e-07	6.03716	Up
Panx1	6.56048	6.57619	27.624	1.47e-07	9.18e-07	6.03716	Up
Praf2	6.56048	6.57619	27.624	1.47e-07	9.18e-07	6.03716	Up
Rras2	6.56048	6.57619	27.624	1.47e-07	9.18e-07	6.03716	Up
Eif2b1	6.56048	6.57619	27.624	1.47e-07	9.18e-07	6.03716	Up
Vps45	6.56048	6.57619	27.624	1.47e-07	9.18e-07	6.03716	Up
Pdia6	6.56048	6.57491	27.624	1.47e-07	9.18e-07	6.03716	Up
Ipo11	6.56048	6.57427	27.624	1.47e-07	9.18e-07	6.03716	Up
Tm7sf3	6.56035	6.57363	27.4717	1.59e-07	9.82e-07	6.00789	Up
Dcakd	6.56032	6.57363	27.4378	1.62e-07	9.97e-07	6.0013	Up
Ttyh2	6.5104	6.53877	26.6715	2.41e-07	1.42e-06	5.84771	Up
Abcb6	6.5104	6.53812	26.6715	2.41e-07	1.42e-06	5.84771	Up
Amfr	6.5104	6.53812	26.6715	2.41e-07	1.42e-06	5.84771	Up
Xpot	6.5104	6.53812	26.6715	2.41e-07	1.42e-06	5.84771	Up
Klhl22	6.5104	6.53812	26.6715	2.41e-07	1.42e-06	5.84771	Up
Rab34	6.5104	6.53812	26.6715	2.41e-07	1.42e-06	5.84771	Up
Tk1	6.5104	6.53812	26.6715	2.41e-07	1.42e-06	5.84771	Up
Tmem51	6.5104	6.53812	26.6715	2.41e-07	1.42e-06	5.84771	Up
Ctdsp2	6.5104	6.53747	26.6715	2.41e-07	1.42e-06	5.84771	Up
Itm2a	6.5104	6.53747	26.6715	2.41e-07	1.42e-06	5.84771	Up
Abhd12	6.5104	6.53747	26.6715	2.41e-07	1.42e-06	5.84771	Up
Mtch1	6.5104	6.53747	26.6715	2.41e-07	1.42e-06	5.84771	Up
Rdh11	6.5104	6.53617	26.6715	2.41e-07	1.42e-06	5.84771	Up
Rhobtb3	6.45852	6.50093	25.719	3.95e-07	2.2e-06	5.65758	Up
Stambp	6.45852	6.50093	25.719	3.95e-07	2.2e-06	5.65758	Up
Galnt7	6.45852	6.50027	25.719	3.95e-07	2.2e-06	5.65758	Up
Unc5b	6.45852	6.50027	25.719	3.95e-07	2.2e-06	5.65758	Up
Guf1	6.45852	6.50027	25.719	3.95e-07	2.2e-06	5.65758	Up
Acad9	6.45851	6.49961	25.719	3.95e-07	2.2e-06	5.65758	Up
Spg21	6.45851	6.49961	25.719	3.95e-07	2.2e-06	5.65758	Up
Npdc1	6.45851	6.49961	25.719	3.95e-07	2.2e-06	5.65758	Up
Wbp1l	6.45851	6.49961	25.719	3.95e-07	2.2e-06	5.65758	Up
Cd44	6.45851	6.49896	25.719	3.95e-07	2.2e-06	5.65758	Up
Rab10	6.45851	6.49896	25.719	3.95e-07	2.2e-06	5.65758	Up
Sema6a	6.45851	6.49896	25.719	3.95e-07	2.2e-06	5.65758	Up
Dhdds	6.45851	6.4983	25.719	3.95e-07	2.2e-06	5.65758	Up
Dnaaf5	6.45851	6.4983	25.719	3.95e-07	2.2e-06	5.65758	Up
Kif5b	6.45851	6.4983	25.719	3.95e-07	2.2e-06	5.65758	Up
Gpat4	6.45851	6.49765	25.719	3.95e-07	2.2e-06	5.65758	Up
Rhoa	6.45851	6.49699	25.719	3.95e-07	2.2e-06	5.65758	Up
Scarf2	6.4047	6.46063	24.7664	6.47e-07	3.4e-06	5.46852	Up
Dnajb12	6.4047	6.45997	24.7664	6.47e-07	3.4e-06	5.46852	Up
Esyt2	6.4047	6.45997	24.7664	6.47e-07	3.4e-06	5.46852	Up
Prkacb	6.4047	6.45931	24.7664	6.47e-07	3.4e-06	5.46852	Up
Rnf13	6.4047	6.45931	24.7664	6.47e-07	3.4e-06	5.46852	Up
Lamtor1	6.4047	6.45931	24.7664	6.47e-07	3.4e-06	5.46852	Up
Rab35	6.4047	6.45931	24.7664	6.47e-07	3.4e-06	5.46852	Up
Lrrc8d	6.4047	6.45931	24.7664	6.47e-07	3.4e-06	5.46852	Up
Adamts1	6.4047	6.45864	24.7664	6.47e-07	3.4e-06	5.46852	Up
Zdhhc15	6.4047	6.45864	24.7664	6.47e-07	3.4e-06	5.46852	Up
Rab5a	6.4047	6.45864	24.7664	6.47e-07	3.4e-06	5.46852	Up
St3gal6	6.4047	6.45864	24.7664	6.47e-07	3.4e-06	5.46852	Up
Acsl5	6.4047	6.45798	24.7664	6.47e-07	3.4e-06	5.46852	Up
Ppp2r5a	6.4047	6.45798	24.7664	6.47e-07	3.4e-06	5.46852	Up
Tbcd	6.4047	6.45798	24.7664	6.47e-07	3.4e-06	5.46852	Up
Atp6ap2	6.3488	6.42046	23.8139	1.06e-06	5.4e-06	5.26761	Up
Sacm1l	6.3488	6.41844	23.8139	1.06e-06	5.4e-06	5.26761	Up
Fam3c	6.3488	6.41844	23.8139	1.06e-06	5.4e-06	5.26761	Up
Ncapg	6.3488	6.41777	23.8139	1.06e-06	5.4e-06	5.26761	Up
Fam174b	6.3488	6.4171	23.8139	1.06e-06	5.4e-06	5.26761	Up
Sppl2b	6.3488	6.4171	23.8139	1.06e-06	5.4e-06	5.26761	Up
Rap2b	6.3488	6.41643	23.8139	1.06e-06	5.4e-06	5.26761	Up
Slc12a2	6.3488	6.41643	23.8139	1.06e-06	5.4e-06	5.26761	Up
Mon2	6.3488	6.41509	23.8139	1.06e-06	5.4e-06	5.26761	Up
Mrpl16	6.29064	6.37698	22.8614	1.74e-06	8.41e-06	5.0752	Up
Glce	6.29064	6.37698	22.8614	1.74e-06	8.41e-06	5.0752	Up
Rasal3	6.29064	6.37698	22.8614	1.74e-06	8.41e-06	5.0752	Up
Mtco2	6.29064	6.3763	22.8614	1.74e-06	8.41e-06	5.0752	Up
Mlec	6.29064	6.3763	22.8614	1.74e-06	8.41e-06	5.0752	Up
Fam234b	6.29064	6.3763	22.8614	1.74e-06	8.41e-06	5.0752	Up
Rnf11	6.29064	6.3763	22.8614	1.74e-06	8.41e-06	5.0752	Up
Man2a1	6.29064	6.37562	22.8614	1.74e-06	8.41e-06	5.0752	Up
Cdc42ep1	6.29064	6.37562	22.8614	1.74e-06	8.41e-06	5.0752	Up
Map2k2	6.29064	6.37562	22.8614	1.74e-06	8.41e-06	5.0752	Up
Klhl13	6.29064	6.37562	22.8614	1.74e-06	8.41e-06	5.0752	Up
Nectin3	6.29064	6.37562	22.8614	1.74e-06	8.41e-06	5.0752	Up
Mgat5	6.29064	6.37494	22.8614	1.74e-06	8.41e-06	5.0752	Up
Lpcat2	6.29064	6.37494	22.8614	1.74e-06	8.41e-06	5.0752	Up
Snx12	6.29064	6.37494	22.8614	1.74e-06	8.41e-06	5.0752	Up
Sec22b	6.29064	6.37494	22.8614	1.74e-06	8.41e-06	5.0752	Up
M6pr	6.29064	6.37426	22.8614	1.74e-06	8.41e-06	5.0752	Up
Gsk3b	6.29064	6.37426	22.8614	1.74e-06	8.41e-06	5.0752	Up
Btaf1	6.29064	6.37358	22.8614	1.74e-06	8.41e-06	5.0752	Up
Napepld	6.23004	6.33347	21.9088	2.86e-06	1.32e-05	4.87943	Up
Rab18	6.23004	6.33278	21.9088	2.86e-06	1.32e-05	4.87943	Up
Abhd17b	6.23004	6.33209	21.9088	2.86e-06	1.32e-05	4.87943	Up
Mro	6.23004	6.33209	21.9088	2.86e-06	1.32e-05	4.87943	Up
Atp6v1e1	6.23004	6.33209	21.9088	2.86e-06	1.32e-05	4.87943	Up
Bag3	6.23004	6.33141	21.9088	2.86e-06	1.32e-05	4.87943	Up
Slc25a1	6.23004	6.33141	21.9088	2.86e-06	1.32e-05	4.87943	Up
Tnfrsf19	6.23004	6.33141	21.9088	2.86e-06	1.32e-05	4.87943	Up
Bax	6.23004	6.33072	21.9088	2.86e-06	1.32e-05	4.87943	Up
Dgcr2	6.23004	6.33072	21.9088	2.86e-06	1.32e-05	4.87943	Up
Gm20518	6.23004	6.33072	21.9088	2.86e-06	1.32e-05	4.87943	Up
Hs2st1	6.23004	6.33003	21.9088	2.86e-06	1.32e-05	4.87943	Up
Ptpn23	6.23004	6.33003	21.9088	2.86e-06	1.32e-05	4.87943	Up
Fads2	6.23004	6.32934	21.9088	2.86e-06	1.32e-05	4.87943	Up
Ociad1	6.16678	6.28781	20.9563	4.7e-06	2.01e-05	4.6968	Up
Adcy6	6.16678	6.28711	20.9563	4.7e-06	2.01e-05	4.6968	Up
B4galt7	6.16678	6.28711	20.9563	4.7e-06	2.01e-05	4.6968	Up
Cdk18	6.16678	6.28711	20.9563	4.7e-06	2.01e-05	4.6968	Up
Cnih4	6.16678	6.28711	20.9563	4.7e-06	2.01e-05	4.6968	Up
Ppp2r1b	6.16678	6.28711	20.9563	4.7e-06	2.01e-05	4.6968	Up
Snx8	6.16678	6.28711	20.9563	4.7e-06	2.01e-05	4.6968	Up
Timm17a	6.16678	6.28641	20.9563	4.7e-06	2.01e-05	4.6968	Up
Ndufb10	6.16678	6.28641	20.9563	4.7e-06	2.01e-05	4.6968	Up
Ncstn	6.16678	6.28641	20.9563	4.7e-06	2.01e-05	4.6968	Up
Tyw1	6.16678	6.28641	20.9563	4.7e-06	2.01e-05	4.6968	Up
Uqcrq	6.16678	6.28572	20.9563	4.7e-06	2.01e-05	4.6968	Up
Nus1	6.16678	6.28572	20.9563	4.7e-06	2.01e-05	4.6968	Up
Rnf128	6.16678	6.28572	20.9563	4.7e-06	2.01e-05	4.6968	Up
Atp11c	6.16678	6.28572	20.9563	4.7e-06	2.01e-05	4.6968	Up
Rab6a	6.16678	6.28572	20.9563	4.7e-06	2.01e-05	4.6968	Up
Rhoj	6.16678	6.28572	20.9563	4.7e-06	2.01e-05	4.6968	Up
Stx2	6.16678	6.28572	20.9563	4.7e-06	2.01e-05	4.6968	Up
Tmem132a	6.16678	6.28572	20.9563	4.7e-06	2.01e-05	4.6968	Up
Bcap29	6.16678	6.28502	20.9563	4.7e-06	2.01e-05	4.6968	Up
Fndc3c1	6.16678	6.28502	20.9563	4.7e-06	2.01e-05	4.6968	Up
Slc25a32	6.16678	6.28502	20.9563	4.7e-06	2.01e-05	4.6968	Up
Nomo1	6.16678	6.28502	20.9563	4.7e-06	2.01e-05	4.6968	Up
Bri3bp	6.16678	6.28432	20.9563	4.7e-06	2.01e-05	4.6968	Up
Acsbg1	6.10062	6.24128	20.0037	7.73e-06	3.16e-05	4.50031	Up
Acvr2b	6.10062	6.24057	20.0037	7.73e-06	3.16e-05	4.50031	Up
Mcam	6.10062	6.23986	20.0037	7.73e-06	3.16e-05	4.50031	Up
Ppp2r5c	6.10062	6.23986	20.0037	7.73e-06	3.16e-05	4.50031	Up
Saraf	6.10062	6.23986	20.0037	7.73e-06	3.16e-05	4.50031	Up
Uxs1	6.10062	6.23986	20.0037	7.73e-06	3.16e-05	4.50031	Up
Tyk2	6.10062	6.23916	20.0037	7.73e-06	3.16e-05	4.50031	Up
Ryk	6.10062	6.23916	20.0037	7.73e-06	3.16e-05	4.50031	Up
Vps28	6.10062	6.23916	20.0037	7.73e-06	3.16e-05	4.50031	Up
Vps37b	6.10062	6.23845	20.0037	7.73e-06	3.16e-05	4.50031	Up
Mrpl39	6.10062	6.23775	20.0037	7.73e-06	3.16e-05	4.50031	Up
Rhob	6.10062	6.23775	20.0037	7.73e-06	3.16e-05	4.50031	Up
Mavs	6.03129	6.19236	19.0512	1.27e-05	4.9e-05	4.3098	Up
P2rx4	6.03129	6.19236	19.0512	1.27e-05	4.9e-05	4.3098	Up
Znf281	6.03129	6.19236	19.0512	1.27e-05	4.9e-05	4.3098	Up
Ranbp1	6.03129	6.19164	19.0512	1.27e-05	4.9e-05	4.3098	Up
Snx5	6.03129	6.19164	19.0512	1.27e-05	4.9e-05	4.3098	Up
Tmem9b	6.03129	6.19164	19.0512	1.27e-05	4.9e-05	4.3098	Up
Tyr	6.03129	6.19164	19.0512	1.27e-05	4.9e-05	4.3098	Up
Slc30a1	6.03129	6.19164	19.0512	1.27e-05	4.9e-05	4.3098	Up
Uqcrfs1	6.03129	6.19093	19.0512	1.27e-05	4.9e-05	4.3098	Up
Alg5	6.03129	6.19093	19.0512	1.27e-05	4.9e-05	4.3098	Up
Kct2	6.03129	6.19093	19.0512	1.27e-05	4.9e-05	4.3098	Up
Pnkd	6.03129	6.19093	19.0512	1.27e-05	4.9e-05	4.3098	Up
Rab8b	6.03129	6.19093	19.0512	1.27e-05	4.9e-05	4.3098	Up
Erbb2	6.03129	6.19093	19.0512	1.27e-05	4.9e-05	4.3098	Up
9530068E07Rik	6.03129	6.19093	19.0512	1.27e-05	4.9e-05	4.3098	Up
Rbms1	6.03129	6.19093	19.0512	1.27e-05	4.9e-05	4.3098	Up
Lgr4	6.03129	6.19021	19.0512	1.27e-05	4.9e-05	4.3098	Up
Mcoln3	6.03129	6.19021	19.0512	1.27e-05	4.9e-05	4.3098	Up
Nle1	6.03129	6.19021	19.0512	1.27e-05	4.9e-05	4.3098	Up
Plod2	6.03129	6.19021	19.0512	1.27e-05	4.9e-05	4.3098	Up
Wls	6.03129	6.19021	19.0512	1.27e-05	4.9e-05	4.3098	Up
Ppp2r2d	6.03129	6.19021	19.0512	1.27e-05	4.9e-05	4.3098	Up
Uqcc1	6.03129	6.19021	19.0512	1.27e-05	4.9e-05	4.3098	Up
Rngtt	6.03129	6.1895	19.0512	1.27e-05	4.9e-05	4.3098	Up
Rhoc	6.03129	6.1895	19.0512	1.27e-05	4.9e-05	4.3098	Up
Slc29a1	5.95845	6.14163	18.0986	2.1e-05	7.64e-05	4.11691	Up
Faah	5.95845	6.14163	18.0986	2.1e-05	7.64e-05	4.11691	Up
Slc25a24	5.95845	6.1409	18.0986	2.1e-05	7.64e-05	4.11691	Up
Laptm4b	5.95845	6.1409	18.0986	2.1e-05	7.64e-05	4.11691	Up
Micos13	5.95845	6.1409	18.0986	2.1e-05	7.64e-05	4.11691	Up
Atad1	5.95845	6.1409	18.0986	2.1e-05	7.64e-05	4.11691	Up
Sgk3	5.95845	6.1409	18.0986	2.1e-05	7.64e-05	4.11691	Up
Atp6v1d	5.95845	6.1409	18.0986	2.1e-05	7.64e-05	4.11691	Up
Bnip2	5.95845	6.14018	18.0986	2.1e-05	7.64e-05	4.11691	Up
Card19	5.95845	6.14018	18.0986	2.1e-05	7.64e-05	4.11691	Up
Dagla	5.95845	6.14018	18.0986	2.1e-05	7.64e-05	4.11691	Up
Man1a2	5.95845	6.14018	18.0986	2.1e-05	7.64e-05	4.11691	Up
Mms19	5.95845	6.14018	18.0986	2.1e-05	7.64e-05	4.11691	Up
Ndufs3	5.95845	6.14018	18.0986	2.1e-05	7.64e-05	4.11691	Up
Slc38a1	5.95845	6.14018	18.0986	2.1e-05	7.64e-05	4.11691	Up
Vamp3	5.95845	6.14018	18.0986	2.1e-05	7.64e-05	4.11691	Up
Lrrc8c	5.95845	6.14018	18.0986	2.1e-05	7.64e-05	4.11691	Up
Snx1	5.95845	6.13945	18.0986	2.1e-05	7.64e-05	4.11691	Up
Ltn1	5.95845	6.13873	18.0986	2.1e-05	7.64e-05	4.11691	Up
Fam171a1	5.95845	6.13801	18.0986	2.1e-05	7.64e-05	4.11691	Up
Myof	5.95791	6.13728	17.8927	2.34e-05	8.46e-05	4.07263	Up
Dtl	5.88173	6.08968	17.1461	3.46e-05	0.000119811	3.9215	Up
Tes	5.88173	6.08968	17.1461	3.46e-05	0.000119811	3.9215	Up
Golt1b	5.88173	6.08968	17.1461	3.46e-05	0.000119811	3.9215	Up
Rapsn	5.88173	6.08895	17.1461	3.46e-05	0.000119811	3.9215	Up
Slc1a5	5.88173	6.08895	17.1461	3.46e-05	0.000119811	3.9215	Up
Tmem63a	5.88173	6.08895	17.1461	3.46e-05	0.000119811	3.9215	Up
Xpo7	5.88173	6.08895	17.1461	3.46e-05	0.000119811	3.9215	Up
Soat1	5.88173	6.08895	17.1461	3.46e-05	0.000119811	3.9215	Up
Ptpn11	5.88173	6.08895	17.1461	3.46e-05	0.000119811	3.9215	Up
Psen1	5.88173	6.08821	17.1461	3.46e-05	0.000119811	3.9215	Up
Fam171a2	5.88173	6.08821	17.1461	3.46e-05	0.000119811	3.9215	Up
Cope	5.88173	6.08748	17.1461	3.46e-05	0.000119811	3.9215	Up
Itm2b	5.88173	6.08748	17.1461	3.46e-05	0.000119811	3.9215	Up
Ppp6r3	5.88173	6.08748	17.1461	3.46e-05	0.000119811	3.9215	Up
Fabp5	5.88173	6.08674	17.1461	3.46e-05	0.000119811	3.9215	Up
Pign	5.88173	6.08674	17.1461	3.46e-05	0.000119811	3.9215	Up
Hmox2	5.88173	6.08674	17.1461	3.46e-05	0.000119811	3.9215	Up
Mtfr1l	5.88173	6.08674	17.1461	3.46e-05	0.000119811	3.9215	Up
Ehd4	5.80071	6.0349	16.1935	5.72e-05	0.000191567	3.71768	Up
Vps29	5.80071	6.0349	16.1935	5.72e-05	0.000191567	3.71768	Up
Ifngr1	5.80071	6.03416	16.1935	5.72e-05	0.000191567	3.71768	Up
Plekhb2	5.80071	6.03416	16.1935	5.72e-05	0.000191567	3.71768	Up
Ptp4a1	5.80071	6.03416	16.1935	5.72e-05	0.000191567	3.71768	Up
Adipor1	5.80071	6.03341	16.1935	5.72e-05	0.000191567	3.71768	Up
Cul2	5.80071	6.03341	16.1935	5.72e-05	0.000191567	3.71768	Up
Gnpat	5.80071	6.03341	16.1935	5.72e-05	0.000191567	3.71768	Up
Lgals8	5.80071	6.03341	16.1935	5.72e-05	0.000191567	3.71768	Up
Josd1	5.80071	6.03341	16.1935	5.72e-05	0.000191567	3.71768	Up
Slc24a5	5.80071	6.03341	16.1935	5.72e-05	0.000191567	3.71768	Up
Vti1a	5.80071	6.03341	16.1935	5.72e-05	0.000191567	3.71768	Up
Boc	5.80071	6.03267	16.1935	5.72e-05	0.000191567	3.71768	Up
Rhot2	5.80071	6.03267	16.1935	5.72e-05	0.000191567	3.71768	Up
Phb	5.80071	6.03267	16.1935	5.72e-05	0.000191567	3.71768	Up
Rpa3	5.80071	6.03267	16.1935	5.72e-05	0.000191567	3.71768	Up
Rhod	5.80071	6.03193	16.1935	5.72e-05	0.000191567	3.71768	Up
Rac1	5.71486	5.9786	15.241	9.46e-05	0.000302935	3.51865	Up
Arhgap1	5.71486	5.9786	15.241	9.46e-05	0.000302935	3.51865	Up
Cyfip1	5.71486	5.97785	15.241	9.46e-05	0.000302935	3.51865	Up
Timm29	5.71486	5.97785	15.241	9.46e-05	0.000302935	3.51865	Up
Lmbrd2	5.71486	5.97709	15.241	9.46e-05	0.000302935	3.51865	Up
Lrig2	5.71486	5.97709	15.241	9.46e-05	0.000302935	3.51865	Up
Fis1	5.71486	5.97709	15.241	9.46e-05	0.000302935	3.51865	Up
Rab32	5.71486	5.97709	15.241	9.46e-05	0.000302935	3.51865	Up
Atp6v1c1	5.71486	5.97709	15.241	9.46e-05	0.000302935	3.51865	Up
Wdtc1	5.71486	5.97709	15.241	9.46e-05	0.000302935	3.51865	Up
Dnajc16	5.71486	5.97634	15.241	9.46e-05	0.000302935	3.51865	Up
Pigk	5.71486	5.97634	15.241	9.46e-05	0.000302935	3.51865	Up
Nrp1	5.71486	5.97634	15.241	9.46e-05	0.000302935	3.51865	Up
Itfg1	5.71486	5.97634	15.241	9.46e-05	0.000302935	3.51865	Up
Letmd1	5.71486	5.97558	15.241	9.46e-05	0.000302935	3.51865	Up
Relt	5.71486	5.97558	15.241	9.46e-05	0.000302935	3.51865	Up
Grk6	5.62358	5.91985	14.2884	0.000156826	0.00047769	3.32085	Up
Abhd16a	5.62358	5.91908	14.2884	0.000156826	0.00047769	3.32085	Up
Raf1	5.62358	5.91908	14.2884	0.000156826	0.00047769	3.32085	Up
Vps26a	5.62358	5.91832	14.2884	0.000156826	0.00047769	3.32085	Up
Wdfy2	5.62358	5.91832	14.2884	0.000156826	0.00047769	3.32085	Up
Tmc8	5.62358	5.91832	14.2884	0.000156827	0.00047769	3.32085	Up
Rab9a	5.62358	5.91832	14.2884	0.000156827	0.00047769	3.32085	Up
Mvb12a	5.62358	5.91832	14.2884	0.000156827	0.00047769	3.32085	Up
Mrps23	5.62358	5.91832	14.2884	0.000156827	0.00047769	3.32085	Up
Dtx2	5.62358	5.91832	14.2884	0.000156827	0.00047769	3.32085	Up
Abhd17c	5.62358	5.91832	14.2884	0.000156827	0.00047769	3.32085	Up
Trim59	5.62358	5.91755	14.2884	0.000156827	0.00047769	3.32085	Up
Tmc6	5.62358	5.91755	14.2884	0.000156827	0.00047769	3.32085	Up
Sox10	5.62358	5.91755	14.2884	0.000156827	0.00047769	3.32085	Up
Scpep1	5.62358	5.91755	14.2884	0.000156827	0.00047769	3.32085	Up
Rras	5.62358	5.91755	14.2884	0.000156827	0.00047769	3.32085	Up
Pacc1	5.62358	5.91755	14.2884	0.000156827	0.00047769	3.32085	Up
Arfgef1	5.62358	5.91755	14.2884	0.000156827	0.00047769	3.32085	Up
Tmed1	5.62358	5.91679	14.2884	0.000156827	0.00047769	3.32085	Up
Thada	5.62358	5.91679	14.2884	0.000156827	0.00047769	3.32085	Up
Rer1	5.62358	5.91679	14.2884	0.000156827	0.00047769	3.32085	Up
Psen2	5.62358	5.91679	14.2884	0.000156827	0.00047769	3.32085	Up
Dcaf8	5.62358	5.91679	14.2884	0.000156827	0.00047769	3.32085	Up
Plaa	5.52614	5.85687	13.3359	0.000260378	0.0007601	3.11913	Up
Grb2	5.52614	5.85687	13.3359	0.000260378	0.0007601	3.11913	Up
Rtn3	5.52614	5.85687	13.3359	0.000260378	0.0007601	3.11913	Up
Stk16	5.52614	5.85609	13.3359	0.000260378	0.0007601	3.11913	Up
Dlgap4	5.52614	5.85687	13.3359	0.000260378	0.0007601	3.11913	Up
Cux2	5.52614	5.85609	13.3359	0.000260378	0.0007601	3.11913	Up
Rtn4	5.52614	5.85609	13.3359	0.000260378	0.0007601	3.11913	Up
Ackr3	5.52614	5.85687	13.3359	0.000260378	0.0007601	3.11913	Up
Ndufa4	5.52614	5.85609	13.3359	0.000260378	0.0007601	3.11913	Up
Daglb	5.52614	5.85609	13.3359	0.000260378	0.0007601	3.11913	Up
Hat1	5.52614	5.85609	13.3359	0.000260378	0.0007601	3.11913	Up
Trpv2	5.52614	5.85532	13.3359	0.000260378	0.0007601	3.11913	Up
Vps26b	5.52614	5.85532	13.3359	0.000260378	0.0007601	3.11913	Up
Rap2c	5.52614	5.85532	13.3359	0.000260378	0.0007601	3.11913	Up
Tmem9	5.52614	5.85532	13.3359	0.000260378	0.0007601	3.11913	Up
Pgrmc1	5.52614	5.85532	13.3359	0.000260378	0.0007601	3.11913	Up
Cox4i1	5.52614	5.85454	13.3359	0.000260378	0.0007601	3.11913	Up
Uqcc2	5.42163	5.7917	12.3833	0.000433189	0.00119995	2.92084	Up
Tmem115	5.42163	5.7917	12.3833	0.000433189	0.00119995	2.92084	Up
Rffl	5.42163	5.7917	12.3833	0.000433189	0.00119995	2.92084	Up
Stau2	5.42163	5.7917	12.3833	0.000433189	0.00119995	2.92084	Up
Clcn6	5.42163	5.7917	12.3833	0.000433189	0.00119995	2.92084	Up
Cers5	5.42163	5.7917	12.3833	0.000433189	0.00119995	2.92084	Up
Ssr1	5.42163	5.7917	12.3833	0.000433189	0.00119995	2.92084	Up
Pigg	5.42163	5.7917	12.3833	0.000433189	0.00119995	2.92084	Up
Mfsd14b	5.42163	5.7917	12.3833	0.000433189	0.00119995	2.92084	Up
Smpd2	5.42163	5.7917	12.3833	0.000433189	0.00119995	2.92084	Up
Sirpa	5.42163	5.79092	12.3833	0.000433189	0.00119995	2.92084	Up
Gpc1	5.42163	5.79249	12.3833	0.000433189	0.00119995	2.92084	Up
Slc2a3	5.42163	5.79092	12.3833	0.000433189	0.00119995	2.92084	Up
Rab5b	5.42163	5.79092	12.3833	0.000433189	0.00119995	2.92084	Up
Npc1	5.42163	5.79092	12.3833	0.000433189	0.00119995	2.92084	Up
Ighv1-4	5.42163	5.79249	12.3833	0.000433189	0.00119995	2.92084	Up
Gpaa1	5.42163	5.79092	12.3833	0.000433189	0.00119995	2.92084	Up
Nop9	5.42163	5.79249	12.3833	0.000433189	0.00119995	2.92084	Up
Clvs1	5.42163	5.79092	12.3833	0.000433189	0.00119995	2.92084	Up
Abhd17a	5.42163	5.79092	12.3833	0.000433189	0.00119995	2.92084	Up
Afg3l1	5.42163	5.79092	12.3833	0.000433189	0.00119995	2.92084	Up
Gga2	5.42163	5.79092	12.3833	0.000433189	0.00119995	2.92084	Up
Ptges2	5.42163	5.79328	12.3833	0.00043319	0.00119995	2.92084	Up
Lrp4	5.42163	5.79328	12.3833	0.00043319	0.00119995	2.92084	Up
Slc35a4	5.42163	5.79013	12.3833	0.00043319	0.00119995	2.92084	Up
Galnt13	5.42163	5.79013	12.3833	0.00043319	0.00119995	2.92084	Up
Zdhhc13	5.42163	5.79013	12.3833	0.00043319	0.00119995	2.92084	Up
Mitf	5.42163	5.79013	12.3833	0.00043319	0.00119995	2.92084	Up
Xpo4	5.42163	5.79013	12.3833	0.00043319	0.00119995	2.92084	Up
Cyb5b	5.42163	5.78934	12.3833	0.00043319	0.00119995	2.92084	Up
Serinc1	5.30895	5.7241	11.4307	0.000722387	0.00189746	2.72183	Up
Rab31	5.30895	5.7241	11.4307	0.000722387	0.00189746	2.72183	Up
Adgre5	5.30895	5.7241	11.4307	0.000722387	0.00189746	2.72183	Up
Ergic1	5.30895	5.7241	11.4307	0.000722387	0.00189746	2.72183	Up
Slc15a4	5.30895	5.7233	11.4307	0.000722387	0.00189746	2.72183	Up
Spred2	5.30895	5.7233	11.4307	0.000722387	0.00189746	2.72183	Up
Tmem131	5.30895	5.7233	11.4307	0.000722387	0.00189746	2.72183	Up
Cds2	5.30895	5.7233	11.4307	0.000722387	0.00189746	2.72183	Up
Fkbp1a	5.30895	5.7233	11.4307	0.000722387	0.00189746	2.72183	Up
Usp5	5.30895	5.7233	11.4307	0.000722387	0.00189746	2.72183	Up
Golim4	5.30895	5.7233	11.4307	0.000722387	0.00189746	2.72183	Up
Ndufs7	5.30895	5.7233	11.4307	0.000722387	0.00189746	2.72183	Up
Psmd9	5.30895	5.7233	11.4307	0.000722387	0.00189746	2.72183	Up
Larp7	5.30895	5.7233	11.4307	0.000722387	0.00189746	2.72183	Up
Xpnpep3	5.30895	5.7233	11.4307	0.000722387	0.00189746	2.72183	Up
Anxa5	5.30895	5.7249	11.4307	0.000722387	0.00189746	2.72183	Up
Snap47	5.30895	5.7225	11.4307	0.000722387	0.00189746	2.72183	Up
Stk39	5.30895	5.7225	11.4307	0.000722387	0.00189746	2.72183	Up
Snx6	5.30895	5.7225	11.4307	0.000722387	0.00189746	2.72183	Up
Pdf	5.30895	5.72569	11.4307	0.000722387	0.00189746	2.72183	Up
Rap2a	5.30895	5.7225	11.4307	0.000722387	0.00189746	2.72183	Up
Rragc	5.30895	5.7225	11.4307	0.000722387	0.00189746	2.72183	Up
Ttyh3	5.30895	5.7225	11.4307	0.000722387	0.00189746	2.72183	Up
Lmbrd1	5.30895	5.7225	11.4307	0.000722387	0.00189746	2.72183	Up
Map2k1	5.30895	5.7225	11.4307	0.000722387	0.00189746	2.72183	Up
Ap1m1	5.30895	5.7217	11.4307	0.000722387	0.00189746	2.72183	Up
Gk	5.30895	5.7217	11.4307	0.000722387	0.00189746	2.72183	Up
Efna5	5.30895	5.7217	11.4307	0.000722387	0.00189746	2.72183	Up
Tmed3	5.18673	5.65213	10.4782	0.00120792	0.00301665	2.52048	Up
Tmed2	5.18673	5.65213	10.4782	0.00120792	0.00301665	2.52048	Up
Sf3b5	5.18673	5.65213	10.4782	0.00120792	0.00301665	2.52048	Up
Ppp2r5e	5.18673	5.65213	10.4782	0.00120792	0.00301665	2.52048	Up
Pin1	5.18673	5.65213	10.4782	0.00120792	0.00301665	2.52048	Up
Rae1	5.18673	5.65213	10.4782	0.00120792	0.00301665	2.52048	Up
Ilk	5.18673	5.65213	10.4782	0.00120792	0.00301665	2.52048	Up
Rheb	5.18673	5.65213	10.4782	0.00120792	0.00301665	2.52048	Up
Cr1l	5.18673	5.65213	10.4782	0.00120792	0.00301665	2.52048	Up
Ccdc115	5.18673	5.65213	10.4782	0.00120792	0.00301665	2.52048	Up
Chmp5	5.18673	5.65213	10.4782	0.00120792	0.00301665	2.52048	Up
Arl6ip1	5.18673	5.65213	10.4782	0.00120792	0.00301665	2.52048	Up
Idh3a	5.18673	5.65132	10.4782	0.00120792	0.00301665	2.52048	Up
Slc29a3	5.18673	5.65132	10.4782	0.00120792	0.00301665	2.52048	Up
Tmem175	5.18673	5.65132	10.4782	0.00120792	0.00301665	2.52048	Up
Cbr4	5.18673	5.65132	10.4782	0.00120792	0.00301665	2.52048	Up
Asns	5.18673	5.65132	10.4782	0.00120792	0.00301665	2.52048	Up
Arf6	5.18673	5.65132	10.4782	0.00120792	0.00301665	2.52048	Up
Prkaa1	5.18673	5.65132	10.4782	0.00120792	0.00301665	2.52048	Up
Tcirg1	5.18673	5.65051	10.4782	0.00120792	0.00301665	2.52048	Up
Tfap4	5.18673	5.65051	10.4782	0.00120792	0.00301665	2.52048	Up
Zwilch	5.18673	5.65051	10.4782	0.00120792	0.00301665	2.52048	Up
Pdcd2	5.18673	5.65051	10.4782	0.00120792	0.00301665	2.52048	Up
Glt8d1	5.18673	5.65051	10.4782	0.00120792	0.00301665	2.52048	Up
Marchf9	5.18673	5.6497	10.4782	0.00120792	0.00301665	2.52048	Up
Ccdc124	5.18673	5.6497	10.4782	0.00120792	0.00301665	2.52048	Up
Stat1	5.05318	5.57702	9.52562	0.00202623	0.00474244	2.324	Up
Pip4p1	5.05318	5.57702	9.52562	0.00202623	0.00474244	2.324	Up
Fam20b	5.05318	5.57702	9.52562	0.00202623	0.00474244	2.324	Up
Slc39a7	5.05318	5.5762	9.52562	0.00202623	0.00474244	2.324	Up
Ccnb2	5.05318	5.57702	9.52562	0.00202623	0.00474244	2.324	Up
Trim27	5.05318	5.5762	9.52562	0.00202623	0.00474244	2.324	Up
Vamp4	5.05318	5.5762	9.52562	0.00202623	0.00474244	2.324	Up
Use1	5.05318	5.5762	9.52562	0.00202623	0.00474244	2.324	Up
Pex10	5.05318	5.5762	9.52562	0.00202623	0.00474244	2.324	Up
Gdpd1	5.05318	5.5762	9.52562	0.00202623	0.00474244	2.324	Up
Lpcat1	5.05318	5.5762	9.52562	0.00202623	0.00474244	2.324	Up
Nmt2	5.05318	5.5762	9.52562	0.00202623	0.00474244	2.324	Up
G6pc3	5.05318	5.5762	9.52562	0.00202623	0.00474244	2.324	Up
Fbxl17	5.05318	5.5762	9.52562	0.00202623	0.00474244	2.324	Up
Dstyk	5.05318	5.5762	9.52562	0.00202623	0.00474244	2.324	Up
Mrpl12	5.05318	5.5762	9.52562	0.00202623	0.00474244	2.324	Up
Clstn1	5.05318	5.5762	9.52562	0.00202623	0.00474244	2.324	Up
Get3	5.05318	5.5762	9.52562	0.00202623	0.00474244	2.324	Up
Bag1	5.05318	5.5762	9.52562	0.00202623	0.00474244	2.324	Up
Tmem106b	5.05318	5.57538	9.52562	0.00202623	0.00474244	2.324	Up
Smarcc2	5.05318	5.57538	9.52562	0.00202623	0.00474244	2.324	Up
Stx16	5.05318	5.57538	9.52562	0.00202623	0.00474244	2.324	Up
Tapt1	5.05318	5.57538	9.52562	0.00202623	0.00474244	2.324	Up
Gm10320	5.05318	5.57538	9.52562	0.00202623	0.00474244	2.324	Up
Sec61b	5.05318	5.57538	9.52562	0.00202623	0.00474244	2.324	Up
Usp4	5.05318	5.57538	9.52562	0.00202623	0.00474244	2.324	Up
Tmem120a	5.05318	5.57538	9.52562	0.00202623	0.00474244	2.324	Up
Ghdc	5.05318	5.57538	9.52562	0.00202623	0.00474244	2.324	Up
Cog5	5.05318	5.57538	9.52562	0.00202623	0.00474244	2.324	Up
Nubp2	5.05318	5.57538	9.52562	0.00202623	0.00474244	2.324	Up
Exosc9	5.05318	5.57538	9.52562	0.00202623	0.00474244	2.324	Up
Dnajc8	5.05318	5.57456	9.52562	0.00202623	0.00474244	2.324	Up

## Sheet: passway
	ONTOLOGY	ID	Description	GeneRatio	BgRatio	pvalue	p.adjust	qvalue	geneID	Count
GO:0006886	BP	GO:0006886	intracellular protein transport	190/1480	857/28891	3.8827e-69	2.24653e-65	1.42761e-65	Flna/Hgs/Vamp7/Bcap31/Samm50/Scamp3/Stx12/Gnptab/Chp1/Stx6/Stxbp2/Stam/Xpo1/Stxbp3/Tnpo1/Erbin/Sec63/Aup1/Ipo5/Zdhhc20/Scfd1/Snx27/Ipo7/Cse1l/Tmem30a/Rab1b/Tnpo3/Tnfrsf1a/Napa/Stx7/Preb/Tmed10/Vps35/Stom/Timm23/Asph/Tomm40/Agk/Tm9sf4/Snx3/Pom121/Hspa4/Itgb1/Stx8/Stxbp1/Xpo5/Sort1/Arf2/Irgm1/Nedd4/Rab38/Nup188/Srebf1/Snx17/Vps45/Ipo11/Ehd1/Tmed9/Arf4/Xpot/Mtch1/Rab5c/Rab10/Kif5b/Zdhhc15/Rab5a/Tomm…	190
GO:0051668	BP	GO:0051668	localization within membrane	144/1480	724/28891	4.07812e-46	1.1798e-42	7.49731e-43	Epha3/Flna/Hgs/Vamp7/Tmem59/Samm50/Mmp14/Tm9sf3/Stx12/Atp2c1/Stx6/Tm9sf2/Sec63/Ccdc47/Adam10/Zdhhc20/Snx27/Tnfrsf1a/Stx7/Neto2/Vps35/Rala/Ezr/Ssh1/Stom/Tomm40/Lgals9/Agk/Tm9sf4/Ncln/Snx3/Acsl3/Sh3pxd2b/Hspa4/Itgb1/Stx8/Stxbp1/Rab38/Snx17/Atp1b3/Ehd1/Rab34/Mtch1/Ndc1/Rab10/Kif5b/Lamtor1/Rab35/Zdhhc15/Ppp2r5a/Tomm22/Sacm1l/Nectin3/Snx12/Gsk3b/Bax/Ptpn23/Flot2/Adcy6/Rab6a/Vps37b/Rab8b/Erbb2/Sec61a1/…	144
GO:0033365	BP	GO:0033365	protein localization to organelle	168/1480	976/28891	6.12696e-45	1.18169e-41	7.50929e-42	Flna/Hgs/Vamp7/Bcap31/Samm50/Gnptab/Chp1/Stam/Xpo1/Syt11/Tnpo1/Sec63/Aup1/Ipo5/Ccdc47/Zw10/Adam10/Ipo7/Cse1l/Tmem30a/Tnpo3/Tnfrsf1a/Gja1/Tmed10/Tfrc/Neto2/Vps35/Rala/Ezr/Ankrd13a/Morc3/Timm23/Rpa2/Tomm40/Agk/Ncln/Cct8/Cct7/Pom121/Hspa4/Gbf1/Sort1/Plk1/Irgm1/Nedd4/Fkbp8/Nup188/Srebf1/Tsg101/Ipo11/Ehd1/Tollip/Arf4/Rab34/Mtch1/Rab10/Lamtor1/Rab35/Zdhhc15/Tomm22/M6pr/Gsk3b/Ipo9/Aifm1/Abhd17b/Bag3/Bax…	168
GO:0048193	BP	GO:0048193	Golgi vesicle transport	87/1480	281/28891	5.62153e-44	8.13154e-41	5.16737e-41	Vamp7/Bcap31/Atp2c1/Stx6/Zw10/Scfd1/Ankfy1/Rab1b/Preb/Tmed10/Snx3/Acsl3/Lman2/Gbf1/Sort1/Tmed9/Arf4/Rab34/Rab10/Snx12/Sec22b/Cnih4/Snx8/Rab6a/Bcap29/Copa/Cul3/Arf5/Rab8b/Dnm2/Vamp3/Snx1/Golt1b/Cope/Vps29/Vti1a/Arf1/Arf3/Stx18/Sptbn1/Tmed1/Rer1/Vti1b/Copb2/Copg1/Arcn1/Rab8a/Tmem115/Gga2/Golga7/Vapb/Rab31/Ergic1/Myo5a/Myo18a/Tmed3/Tmed2/Copg2/Copb1/Exoc1/Vamp4/Use1/Cog5/Exoc4/Tmed4/Cog1/Cog7/Arl1/C…	87
GO:0072657	BP	GO:0072657	protein localization to membrane	126/1480	641/28891	8.2789e-40	9.58034e-37	6.08804e-37	Epha3/Flna/Hgs/Vamp7/Tmem59/Samm50/Mmp14/Tm9sf3/Atp2c1/Tm9sf2/Sec63/Ccdc47/Adam10/Zdhhc20/Snx27/Tnfrsf1a/Stx7/Neto2/Vps35/Ezr/Ssh1/Stom/Tomm40/Lgals9/Agk/Tm9sf4/Ncln/Acsl3/Sh3pxd2b/Hspa4/Itgb1/Stx8/Stxbp1/Rab38/Atp1b3/Ehd1/Rab34/Mtch1/Rab10/Kif5b/Lamtor1/Zdhhc15/Ppp2r5a/Tomm22/Sacm1l/Nectin3/Gsk3b/Bax/Flot2/Adcy6/Rab6a/Vps37b/Rab8b/Erbb2/Sec61a1/Atad1/Vamp3/Rapsn/Ehd4/Mtch2/Sptbn1/Rac1/Timm29/Fis…	126
GO:0061024	BP	GO:0061024	membrane organization	134/1480	765/28891	1.17161e-36	1.12983e-33	7.17973e-34	Hgs/Ptprd/Vamp7/Samm50/Stx12/Atp2c1/Chp1/Stx6/Abcb1b/Syt4/Syt11/Brox/Ccdc47/Snx27/Abcc1/Chchd6/Ankfy1/Tmem30a/Atp2a2/Stx7/Preb/Tmed10/Ssh1/Vdac2/Tomm40/Ugcg/Agk/Ncln/Atp11a/Snx3/Ano6/Hspa4/Itgb1/Stx8/Gbf1/Stxbp1/Plk1/Pdcd6ip/Chchd3/Tmed9/Rab34/Mtch1/Immt/Kif5b/Rhoa/Tomm22/Lpcat2/Sec22b/Gsk3b/Bax/Tom1/Atp11c/Stx2/Nup93/Cul3/Rab8b/Sec61a1/Dnm2/Tmem33/Laptm4b/Micos13/Vamp3/Myof/Cep55/Dnajc11/Rapsn/G…	134
GO:0032880	BP	GO:0032880	regulation of protein localization	155/1480	995/28891	4.49624e-36	3.71646e-33	2.36171e-33	Epha3/Flna/Nedd4l/Usp8/Vamp7/Bcap31/Tmem59/Mmp14/Atp2c1/Chp1/Stx6/Xpo1/Syt4/Syt11/Wwp2/Ndfip1/Ipo5/Adam10/Scfd1/Snx27/Ipo7/Tmem30a/Tnfrsf1a/Stx7/Csnk1e/Gja1/Tmed10/Tfrc/Neto2/Vps35/Neo1/Ezr/Ankrd13a/Ssh1/Lrp5/Stom/Asph/Tm9sf4/Snx3/Acsl3/Cct8/Cct7/Adam9/Itgb1/Stx8/Gbf1/Plk1/Rab38/Srebf1/Tsg101/Tm7sf3/Rab34/Kif5b/Lamtor1/Ppp2r5a/Slc12a2/Snx12/Gsk3b/Abhd17b/Bag3/Ptpn23/Gna11/Ppia/Tmem132a/Epb41/Tyk2…	155
GO:0010256	BP	GO:0010256	endomembrane system organization	111/1480	563/28891	2.9615e-35	2.14191e-32	1.36112e-32	Usp8/Vamp7/Pi4k2b/Stx12/Pi4k2a/Stx6/Arhgap21/Syt4/Syt11/Brox/Ccdc47/Zw10/Smpd4/Atp2a2/Rab1b/Tmed10/Bag5/Ugcg/Ncln/Snx3/Ano6/Retreg3/Gbf1/Stxbp1/Plk1/Rab38/Cul7/Tmed9/Rab5c/Rab10/Surf4/Esyt2/Lamtor1/Fam174b/Map2k2/Sec22b/Naglu/Rab18/Tom1/Stx2/Nup93/Sec61a1/Dnm2/Tmem33/Laptm4b/Myof/Vti1a/Stx18/Sptbn1/Prmt5/Arfgef1/Tmed1/Vti1b/Rtn3/Rtn4/Tmem9/Rab8a/Rab5b/Vapb/Sqstm1/Snap47/Map2k1/Ap1m1/Myo5a/Myo18a/…	111
GO:0016050	BP	GO:0016050	vesicle organization	85/1480	359/28891	2.90876e-33	1.87001e-30	1.18834e-30	Usp8/Vamp7/Pi4k2b/Stx12/Pi4k2a/Sdcbp/Chp1/Stx6/Stam/Atp6v0d1/Tyrp1/Syt4/Syt11/Zdhhc20/Ankfy1/Stx7/Preb/Tmed10/Atp6v1h/Bace2/Pmel/Snx3/Stx8/Gbf1/Stxbp1/Sort1/Atp6v1a/Rab38/Atp6v1b2/Pdcd6ip/Tsg101/Tmed9/Abcb6/Rab34/Rab5c/Kif5b/Lamtor1/Zdhhc15/Atp6ap2/Sec22b/Atp6v1e1/Tom1/Stx2/Cul3/Atp6v0a1/Rab8b/Laptm4b/Atp6v1d/Vamp3/Vti1a/Arf1/Rab32/Atp6v1c1/Vti1b/Tmem9/Rab8a/Rab5b/Vapb/Sqstm1/Snap47/Ap1m1/Myo18a/…	85
GO:1901137	BP	GO:1901137	carbohydrate derivative biosynthetic process	112/1480	624/28891	1.0608e-31	6.13781e-29	3.90041e-29	Atp7a/Tmem59/Chp1/Galnt1/Chsy3/Tm9sf2/Prpsap2/Itm2c/Abcc5/Ndufs1/Prps2/Galnt2/Adcy3/Adcy7/Atp5pd/Bace2/Prps1l3/Prps1/Alg2/Ugcg/Stt3a/Slc25a10/Insr/Prpsap1/Gfpt1/Ddost/Chpf/Umps/Pigs/Ndufa10/Dcakd/Tk1/Itm2a/Galnt7/Dhdds/St3gal6/Acsl5/Vangl2/Atp5f1b/Ndufa9/Glce/Mlec/Mgat5/Hs2st1/Rpn1/Vdac1/Adcy6/B4galt7/Ndufb10/Ncstn/Tyw1/Nus1/Atp5f1a/Atp5pb/Atp5po/Uxs1/Ctps1/Alg5/Ndufs3/Ndufv1/Pigt/Soat1/Psen1/Itm…	112
GO:1903829	BP	GO:1903829	positive regulation of protein localization	97/1480	531/28891	3.5049e-28	1.84358e-25	1.17154e-25	Epha3/Flna/Bcap31/Atp2c1/Chp1/Syt11/Ipo5/Snx27/Ipo7/Tmem30a/Tnfrsf1a/Gja1/Tmed10/Tfrc/Vps35/Ezr/Ssh1/Stom/Asph/Tm9sf4/Acsl3/Cct8/Cct7/Adam9/Itgb1/Rab38/Tsg101/Tm7sf3/Rab34/Kif5b/Lamtor1/Gsk3b/Abhd17b/Bag3/Ptpn23/Gna11/Ppia/Tmem132a/Epb41/Tyk2/Vps28/Mavs/Erbb2/Wls/Kif20b/Gnaq/Psen1/Arf1/Sptbn1/Rac1/Lrig2/Fis1/Fyn/Coro2b/Cct4/Abhd17c/Rer1/Rtn4/Pgrmc1/Abhd17a/Lrp4/Xpo4/Myo1c/Sqstm1/Psmd9/Larp7/Gnas/…	97
GO:0007030	BP	GO:0007030	Golgi organization	48/1480	137/28891	1.58027e-27	7.61953e-25	4.842e-25	Vamp7/Pi4k2b/Pi4k2a/Arhgap21/Zw10/Rab1b/Tmed10/Bag5/Gbf1/Cul7/Tmed9/Surf4/Fam174b/Map2k2/Sec22b/Naglu/Dnm2/Vti1a/Stx18/Prmt5/Arfgef1/Tmed1/Vti1b/Rab8a/Map2k1/Myo18a/Tmed3/Tmed2/Vamp4/Cog5/Cdk1/Tmed4/Cog1/Cog7/Arl1/Yipf5/Mapk1/Atl2/Yipf4/Cog3/Tmed5/Cog4/Gak/Atl3/Uso1/Syne1/Sptbn5/Golph3	48
GO:0072594	BP	GO:0072594	establishment of protein localization to organelle	86/1480	452/28891	2.22873e-26	9.91954e-24	6.30359e-24	Flna/Hgs/Vamp7/Bcap31/Samm50/Gnptab/Chp1/Stam/Tnpo1/Sec63/Ipo5/Ipo7/Cse1l/Tnpo3/Tnfrsf1a/Rala/Timm23/Tomm40/Agk/Cct8/Cct7/Pom121/Hspa4/Sort1/Irgm1/Nedd4/Nup188/Srebf1/Tsg101/Ipo11/Mtch1/Rab10/Zdhhc15/Tomm22/M6pr/Ipo9/Aifm1/Bag3/Bax/Ptpn23/Timm17a/Nup93/Vps28/Vps37b/Mavs/Rab8b/Sec61a1/Psen1/Mtch2/Timm29/Fis1/Cct4/Srprb/Sqstm1/Hspa8/Cct3/Prkaa1/Pex10/Get3/Gm10320/Sec61b/Cdk1/Dnaja1/Ipo8/Kpna2/Cct6a…	86
GO:0030036	BP	GO:0030036	actin cytoskeleton organization	111/1480	723/28891	2.00344e-25	8.27991e-23	5.26165e-23	Epha3/Fat1/Flna/Daam2/Daam1/Slc4a2/Kirrel1/Atp2c1/Met/Tgfbr1/Gja1/Rhou/Kit/Rala/Ezr/Ssh1/Sh3pxd2b/Pdgfra/Itgb1/Capza2/Pdcd6ip/Capza1/Rhoa/Antxr1/Vangl2/Add1/Flnb/Tjp1/Cdc42ep1/Sorbs3/Pakap/Capzb/Phldb2/Rhoj/Epb41/Rhob/Cul3/Trim32/Mob2/Rhoc/Nisch/Zyx/Dapk3/Fam171a1/Pdlim7/Cald1/Rhot2/Rhod/Arf1/Arpc1b/Cracd/Sptbn1/Rac1/Cyfip1/Nrp1/Coro2b/Inf2/Ptpn1/Arfgef1/Dbnl/Sipa1l1/Sptan1/Grb2/Flii/Rhot1/Gas2l3…	111
GO:0090150	BP	GO:0090150	establishment of protein localization to membrane	64/1480	270/28891	2.31913e-25	8.94567e-23	5.68473e-23	Vamp7/Samm50/Atp2c1/Sec63/Ccdc47/Zdhhc20/Snx27/Vps35/Stom/Tomm40/Agk/Ncln/Acsl3/Hspa4/Rab34/Mtch1/Rab10/Zdhhc15/Tomm22/Sacm1l/Nectin3/Bax/Vps37b/Rab8b/Erbb2/Sec61a1/Atad1/Vamp3/Rapsn/Mtch2/Sptbn1/Timm29/Fis1/Fyn/Srprb/Rab8a/Npc1/Gga2/Golga7/Myo1c/Rab31/Snap47/Rdx/Arl6ip1/Arpc2/Vamp4/Clstn1/Get3/Gm10320/Sec61b/Exoc4/Sec62/Zdhhc9/Actr3/Scrib/Ndufa13/Cib1/Ssr3/Emc2/Tsc2/Srp68/Vamp5/Golph3/Pard3	64
GO:0051603	BP	GO:0051603	proteolysis involved in protein catabolic process	118/1480	804/28891	3.10244e-25	1.12192e-22	7.12948e-23	Ubc/Ubb/Hspa1b/Itch/Nedd4l/Stub1/Usp8/Wwp1/Bcap31/Rnf130/Rnf149/Marchf7/Stam/Xpo1/Ecpas/Wwp2/Ndfip1/Aup1/Ccdc47/Canx/Rnf19a/Mib1/Usp15/Csnk1e/Hspbp1/Ubr4/Tmem168/Ubr2/Smurf2/Bag5/Znrf3/Ankib1/Ube3c/Gna12/Gid8/Plk1/Rnf144a/Rnf19b/Nedd4/Pdcd6ip/Tsg101/Cul7/Tollip/Amfr/Klhl22/Erlin2/Rhobtb3/Dnajb12/Rnf13/Rnf11/Gsk3b/Naglu/Ptpn23/Rnf128/Ppp2r5c/Vps28/Vps37b/Cul3/Bag2/Trim32/Yme1l1/Man1a2/Ltn1/Dtl/Pse…	118
GO:0090407	BP	GO:0090407	organophosphate biosynthetic process	93/1480	550/28891	1.65158e-24	5.6212e-22	3.57212e-22	Pi4k2b/Pi4k2a/Chp1/Slc4a7/Prpsap2/Pgs1/Sptlc1/Pisd/Far1/Tamm41/Ndufs1/Prps2/Adcy3/Adcy7/Vac14/Atp5pd/Prps1l3/Prps1/Slc25a10/Acsl3/Prpsap1/Umps/Pigs/Rab38/Ndufa10/Dcakd/Tk1/Dhdds/Gpat4/Acsl5/Atp5f1b/Ndufa9/Lpcat2/Vdac1/Adcy6/Ndufb10/Nus1/Atp5f1a/Atp5pb/Atp5po/Ctps1/Ndufs3/Ndufv1/Pigt/Fabp5/Pign/Sptlc2/Gnpat/Pi4ka/Pigk/Tyms/Pigg/Gpaa1/Serinc1/Cds2/Ndufs7/Map2k1/Gk/Pdhb/Pgk1/Dgke/Lpcat1/Bpnt1/Dpm1/C…	93
GO:0098657	BP	GO:0098657	import into cell	128/1480	935/28891	1.75421e-24	5.63881e-22	3.5833e-22	Epha3/Itch/Nedd4l/Slc12a7/Hgs/Vamp7/Lrp12/Tgfbr2/Sdcbp/Pip4p2/Arhgap21/Atp1a1/Slc3a2/Lrrc8a/Syt4/Syt11/Met/Scamp1/Abcc1/Atp1a4/Canx/Ankfy1/Mib1/Slc6a6/Csnk1e/Ifitm3/Tfrc/Atp6v1h/Rhou/Rala/Ralb/Ezr/Ankrd13a/Ldlr/Lrp5/Vac14/Slc38a2/Insr/Slc7a1/Tm9sf4/Snx3/Acsl3/Ano6/Tyro3/Lman2/Itgb1/Sort1/Slc12a4/Ldlrad3/Nedd4/Snx17/Atp1b3/Tsg101/Ehd1/Rab34/Rab5c/Csnk1g2/Cd44/Csnk1g3/Esyt2/Rab5a/Acsl5/Add1/Slc12a2…	128
GO:0030029	BP	GO:0030029	actin filament-based process	117/1480	810/28891	1.99908e-24	6.08773e-22	3.86858e-22	Epha3/Fat1/Flna/Nedd4l/Daam2/Daam1/Slc4a2/Kirrel1/Atp2c1/Atp1a1/Met/Tgfbr1/Atp2a2/Gja1/Rhou/Kit/Rala/Ezr/Ssh1/Sh3pxd2b/Pdgfra/Itgb1/Capza2/Pdcd6ip/Capza1/Rhoa/Antxr1/Vangl2/Add1/Flnb/Tjp1/Cdc42ep1/Sorbs3/Pakap/Capzb/Phldb2/Rhoj/Epb41/Rhob/Cul3/Trim32/Mob2/Rhoc/Nisch/Zyx/Dapk3/Fam171a1/Pdlim7/Cald1/Rhot2/Rhod/Arf1/Arpc1b/Cracd/Sptbn1/Rac1/Cyfip1/Nrp1/Coro2b/Inf2/Ptpn1/Arfgef1/Dbnl/Sipa1l1/Sptan1/G…	117
GO:0019637	BP	GO:0019637	organophosphate metabolic process	126/1480	934/28891	1.54562e-23	4.47149e-21	2.84151e-21	Atp7a/Pi4k2b/Abca3/Pi4k2a/Chp1/Gpd2/Pip4p2/Slc4a7/Prpsap2/Pgs1/Smpd4/Sptlc1/Pisd/Far1/Ldlr/Tamm41/Ndufs1/Prps2/Adcy3/Adcy7/Vac14/Atp5pd/Prps1l3/Prps1/Slc25a10/Acsl3/Prpsap1/Gfpt1/Umps/Atp6v1a/Pigs/Rab38/Atp6v1b2/Ndufa10/Dcakd/Pfkfb3/Tk1/Abhd12/Dhdds/Gpat4/Rhoa/Acsl5/Sacm1l/Atp5f1b/Ndufa9/Lpcat2/Napepld/Vdac1/Adcy6/Ndufb10/Nus1/Atp5f1a/Atp5pb/Atp5po/Ctps1/Ndufs3/Ndufv1/Pigt/Fabp5/Pign/Sptlc2/Suclg…	126
GO:1990778	BP	GO:1990778	protein localization to cell periphery	76/1480	400/28891	2.09926e-23	5.78396e-21	3.67555e-21	Epha3/Flna/Vamp7/Tmem59/Mmp14/Atp2c1/Adam10/Snx27/Tnfrsf1a/Stx7/Neto2/Vps35/Ezr/Acsl3/Itgb1/Stx8/Stxbp1/Plk1/Rab38/Atp1b3/Ehd1/Rab34/Rab10/Kif5b/Ppp2r5a/Sacm1l/Nectin3/Gsk3b/Flot2/Adcy6/Epb41/Rab8b/Erbb2/Vamp3/Rapsn/Ehd4/Sptbn1/Rac1/Palm/Rer1/Vti1b/Pgrmc1/Rab8a/Gga2/Golga7/Sqstm1/Rab31/Snap47/Rap2a/Map2k1/Rdx/Myo5a/Tmed2/Arf6/Vamp4/Clstn1/Bsg/Gpsm2/Actr3/Scrib/Cib1/Rab13/Rap1a/Myl12a/Pip5k1a/Tsc2…	76
GO:0022603	BP	GO:0022603	regulation of anatomical structure morphogenesis	127/1480	961/28891	6.44399e-23	1.69477e-20	1.07698e-20	Plxna1/Plxnd1/Bmpr2/Nedd4l/Plxnb2/Hgs/Ptprs/Myo10/Ptprd/Vamp7/Tgfbr2/Ptprm/Ptprf/Acvrl1/Ephb4/Syt4/Plxna2/Met/Bmpr1a/Plxnb1/Plxna4/Pgam5/Adam10/Spred1/Tnfrsf1a/Gja1/Tfrc/Vps35/Rhou/Kit/Rala/Ezr/Vat1/Eng/Gna13/Epha7/Znrf3/Gna12/Pdgfra/Itgb1/Sema4c/Irgm1/Nedd4/Cul7/Cd44/Sema6a/Adamts1/Zdhhc15/Vangl2/Add1/Slc12a2/Tjp1/Cdc42ep1/Map2k2/Gsk3b/Pakap/Capzb/Phldb2/Rhoj/Epb41/Ryk/Rhob/Lgr4/Wls/Dapk3/Fam171…	127
GO:0051640	BP	GO:0051640	organelle localization	98/1480	638/28891	1.42736e-22	3.59074e-20	2.28182e-20	Ubb/Hgs/Vamp7/Steap3/Stx12/Sdcbp/Chp1/Stx6/Arhgap21/Stxbp2/Stam/Xpo1/Stxbp3/Syt4/Syt11/Zw10/Atp2a2/Stx7/Stard3/Preb/Tmed10/Kit/Ralb/Ezr/Mreg/Actr10/Itgb1/Stx8/Gbf1/Stxbp1/Plk1/Pdcd6ip/Tsg101/Tmed9/Rab34/Kif5b/Esyt2/Rnf13/Lamtor1/Naglu/Stx2/Cul3/Dync1h1/Rab8b/Rbm10/Psen1/Rhot2/Arf1/Psen2/Copg1/Arcn1/Rhot1/Rab8a/Nop9/Myo6/Vapb/Myo1c/Map2k1/Myo5a/Vps4b/Chmp5/Tcirg1/Copg2/Myo19/Exoc1/Pip4p1/Tmem106b/…	98
GO:0031344	BP	GO:0031344	regulation of cell projection organization	112/1480	795/28891	1.5862e-22	3.82407e-20	2.43009e-20	Tubb2b/Plxna1/Epha3/Flna/Plxnd1/Bmpr2/Nedd4l/Plxnb2/Ptprs/Ddr2/Ddr1/Myo10/Ptprd/Atp7a/Daam2/Vamp7/Ptprf/Kidins220/Plxna2/Met/Plxnb1/Tgfbr1/Itm2c/Plxna4/Adam10/Cers2/Tmem30a/Vps35/Kit/Rala/Neo1/Ezr/Bag5/Epha7/Adam17/Snx3/Retreg3/Itgb1/Igf1r/Setx/Sema4c/Nedd4/Ehd1/Cul7/Arf4/Cd44/Sema6a/Rhoa/Adamts1/Zdhhc15/Rab5a/Cdc42ep1/Map2k2/Gsk3b/Capzb/Abhd17b/Adcy6/Ryk/Mob2/Ranbp1/Rab8b/Wls/Dnm2/Psen1/Prag1/Dy…	112
GO:0016197	BP	GO:0016197	endosomal transport	56/1480	238/28891	3.4556e-22	7.99764e-20	5.08228e-20	Hgs/Stx12/Stx6/Stam/Snx27/Ankfy1/Vps35/Snx3/Gbf1/Sort1/Snx17/Ehd1/Rhobtb3/Rab10/Lamtor1/Rab35/Dennd2a/Snx12/Ptpn23/Tom1/Snx8/Rab6a/Vps28/Snx5/Rab8b/Laptm4b/Vamp3/Snx1/Golt1b/Ehd4/Vps29/Vti1a/Arhgap1/Vps26a/Mvb12a/Vti1b/Vps26b/Rab8a/Snx6/Vps4b/Chmp5/Arf6/Snx33/Trim27/Vamp4/Stx16/Arl1/Scrib/Usp7/Rab13/Zfyve16/Snx2/Chmp1a/Vta1/Vps4a/Gosr1	56
GO:0043632	BP	GO:0043632	modification-dependent macromolecule catabolic process	102/1480	690/28891	3.60267e-22	8.01733e-20	5.09479e-20	Ubc/Ubb/Hspa1b/Itch/Nedd4l/Stub1/Usp8/Wwp1/Bcap31/Rnf130/Rnf149/Stam/Xpo1/Ecpas/Wwp2/Ndfip1/Aup1/Ccdc47/Canx/Rnf19a/Mib1/Usp15/Csnk1e/Hspbp1/Ubr4/Tmem168/Ubr2/Smurf2/Bag5/Znrf3/Ankib1/Ube3c/Gna12/Gid8/Plk1/Rnf144a/Rnf19b/Nedd4/Tsg101/Cul7/Tollip/Amfr/Klhl22/Erlin2/Rhobtb3/Rnf13/Rnf11/Gsk3b/Naglu/Ptpn23/Rnf128/Ppp2r5c/Vps28/Vps37b/Cul3/Trim32/Man1a2/Ltn1/Dtl/Psen1/Cul2/Psen2/Plaa/Rffl/Psma3/Eif3h/…	102
GO:0120035	BP	GO:0120035	regulation of plasma membrane bounded cell projection organization	110/1480	781/28891	3.93968e-22	8.44258e-20	5.36502e-20	Tubb2b/Plxna1/Epha3/Flna/Plxnd1/Bmpr2/Nedd4l/Plxnb2/Ptprs/Ddr2/Ddr1/Myo10/Ptprd/Atp7a/Daam2/Vamp7/Ptprf/Kidins220/Plxna2/Met/Plxnb1/Tgfbr1/Itm2c/Plxna4/Adam10/Cers2/Tmem30a/Vps35/Kit/Rala/Neo1/Ezr/Bag5/Epha7/Adam17/Snx3/Retreg3/Itgb1/Igf1r/Setx/Sema4c/Nedd4/Ehd1/Cul7/Arf4/Cd44/Sema6a/Rhoa/Adamts1/Zdhhc15/Rab5a/Cdc42ep1/Map2k2/Gsk3b/Capzb/Abhd17b/Adcy6/Ryk/Mob2/Ranbp1/Wls/Dnm2/Psen1/Prag1/Dync1i2/…	110
GO:0006888	BP	GO:0006888	endoplasmic reticulum to Golgi vesicle-mediated transport	40/1480	124/28891	1.21727e-21	2.5154e-19	1.59847e-19	Vamp7/Bcap31/Zw10/Scfd1/Rab1b/Preb/Tmed10/Lman2/Tmed9/Sec22b/Cnih4/Bcap29/Copa/Cul3/Golt1b/Cope/Vti1a/Arf1/Stx18/Tmed1/Copb2/Copg1/Arcn1/Vapb/Ergic1/Tmed3/Tmed2/Copg2/Copb1/Use1/Tmed4/Yipf6/Yipf5/Yipf4/Cog3/Pdcd6/Tmed5/Gosr1/Uso1/Trappc5	40
GO:0034330	BP	GO:0034330	cell junction organization	114/1480	839/28891	1.26569e-21	2.52527e-19	1.60474e-19	Epha3/Flna/Plxnd1/Nrp2/Nedd4l/Plxnb2/Ptprs/Ptpra/Ptprd/Adgrl2/Mmp14/Ptprf/Kirrel1/Acvrl1/Sdcbp/Plxnb1/Tgfbr1/Plxna4/Adam10/Snx27/Il1rap/Gja1/Vps35/Ezr/Cdh19/Ssh1/Epha7/Insr/Itgb1/Igf1r/Sort1/Nedd4/Ptprk/Pdcd6ip/Capza1/Pkp4/Arf4/Rhoa/Zdhhc15/Tbcd/Add1/Tjp1/Gsk3b/Abhd17b/Ptpn23/Phldb2/Stk38l/Rhob/Rab8b/Erbb2/Rhoc/Dapk3/Chd4/Rapsn/Ptpn11/Psen1/Gnpat/Rhod/Arf1/Rac1/Cyfip1/Nrp1/Palm/Fyn/Coro2b/Abhd17c…	114
GO:0019941	BP	GO:0019941	modification-dependent protein catabolic process	100/1480	680/28891	1.38169e-21	2.66483e-19	1.69342e-19	Ubc/Ubb/Hspa1b/Itch/Nedd4l/Stub1/Usp8/Wwp1/Bcap31/Rnf130/Rnf149/Stam/Xpo1/Ecpas/Wwp2/Ndfip1/Aup1/Ccdc47/Canx/Rnf19a/Mib1/Usp15/Csnk1e/Hspbp1/Ubr4/Tmem168/Ubr2/Smurf2/Bag5/Znrf3/Ankib1/Ube3c/Gna12/Gid8/Plk1/Rnf144a/Rnf19b/Nedd4/Tsg101/Cul7/Tollip/Amfr/Klhl22/Erlin2/Rhobtb3/Rnf13/Rnf11/Gsk3b/Naglu/Ptpn23/Rnf128/Ppp2r5c/Vps28/Vps37b/Cul3/Trim32/Man1a2/Ltn1/Dtl/Psen1/Cul2/Psen2/Plaa/Rffl/Psma3/Eif3h/…	100
GO:0009894	BP	GO:0009894	regulation of catabolic process	127/1480	997/28891	1.63434e-21	3.05041e-19	1.93845e-19	Ubb/Hspa1b/Flna/Itch/Nedd4l/Stub1/Usp8/Bcap31/Tmem59/Marchf7/Xpo1/Ndfip1/Scfd1/Sptlc1/Rnf19a/Csnk1e/Gja1/Hspbp1/Vps35/Ralb/Ezr/Ldlr/Tmem168/Bag5/Insr/Snx3/Ankib1/Gna12/Adam9/Itgb1/Plk1/Rnf144a/Rnf19b/Irgm1/Nedd4/Fkbp8/Srebf1/Klhl22/Acsl5/Snx12/Sec22b/Gsk3b/Aifm1/Bag3/Bax/Tom1/Vdac1/Stk38l/Magoh/Tmem132a/Vps28/Cul3/Bag2/Trim32/Atp6v0a1/Thrap3/Laptm4b/Snx1/Rbm10/Dtl/Psen1/Sptlc2/Mtch2/Lrig2/Fyn/Ptp…	127
GO:0006511	BP	GO:0006511	ubiquitin-dependent protein catabolic process	97/1480	668/28891	1.4207e-20	2.56881e-18	1.63241e-18	Hspa1b/Itch/Nedd4l/Stub1/Usp8/Wwp1/Bcap31/Rnf130/Rnf149/Stam/Xpo1/Ecpas/Wwp2/Ndfip1/Aup1/Ccdc47/Canx/Rnf19a/Mib1/Usp15/Csnk1e/Hspbp1/Ubr4/Tmem168/Ubr2/Smurf2/Bag5/Znrf3/Ankib1/Ube3c/Gna12/Gid8/Plk1/Rnf144a/Rnf19b/Nedd4/Tsg101/Cul7/Tollip/Amfr/Klhl22/Erlin2/Rhobtb3/Rnf13/Rnf11/Gsk3b/Naglu/Ptpn23/Rnf128/Ppp2r5c/Vps28/Vps37b/Cul3/Trim32/Man1a2/Ltn1/Dtl/Psen1/Cul2/Psen2/Plaa/Rffl/Psma3/Eif3h/Usp5/Vps…	97
GO:0006605	BP	GO:0006605	protein targeting	61/1480	303/28891	2.39109e-20	4.19237e-18	2.66414e-18	Hgs/Vamp7/Bcap31/Samm50/Gnptab/Erbin/Sec63/Zdhhc20/Stom/Timm23/Tomm40/Agk/Hspa4/Sort1/Irgm1/Nedd4/Srebf1/Mtch1/Zdhhc15/Tomm22/M6pr/Aifm1/Bag3/Timm17a/Vps37b/Rab8b/Erbb2/Sec61a1/Rhod/Mtch2/Timm29/Fis1/Fyn/Srprb/Myo6/Golga7/Myo1c/Sqstm1/Hspa8/Arl6ip1/Prkaa1/Arpc2/Pex10/Get3/Gm10320/Sec61b/Exoc4/Lamp2/Sec62/Zdhhc9/Actr3/Ndufa13/Cib1/Ssr3/Zfyve16/Gipc1/Pik3c3/Bag4/Vps4a/Srp68/Pard3	61
GO:0098876	BP	GO:0098876	vesicle-mediated transport to the plasma membrane	43/1480	155/28891	2.69156e-20	4.58041e-18	2.91072e-18	Hgs/Vamp7/Stx12/Atp2c1/Stx6/Snx27/Vps35/Snx3/Acsl3/Snx17/Ehd1/Rab34/Rab10/Rab35/Sacm1l/Snx12/Ptpn23/Rab8b/Dnm2/Vamp3/Ehd4/Vps29/Vti1a/Sptbn1/Arhgap1/Vps26a/Rab8a/Gga2/Golga7/Rab31/Snap47/Arf6/Exoc1/Vamp4/Clstn1/Stx16/Exoc4/Scrib/Rab13/Exoc8/Exoc2/Vamp5/Golph3	43
GO:0048284	BP	GO:0048284	organelle fusion	45/1480	171/28891	3.61764e-20	5.98047e-18	3.80042e-18	Vamp7/Stx12/Chp1/Stx6/Syt4/Syt11/Ankfy1/Stx7/Tfrc/Vat1/Stx8/Stxbp1/Chchd3/Rab34/Kif5b/Sec22b/Bax/Tom1/Stx2/Rab8b/Vamp3/Vti1a/Mtch2/Fis1/Vti1b/Rab8a/Afg3l1/Snap47/Chmp5/Tmem175/Vamp4/Stx16/Yipf5/Rab13/Miga2/Stoml2/Afg3l2/Adck1/Usp30/Stx11/Yipf4/Chmp1a/Vps4a/Gosr1/Uso1	45
GO:0006897	BP	GO:0006897	endocytosis	100/1480	712/28891	4.05175e-20	6.51206e-18	4.13823e-18	Epha3/Itch/Nedd4l/Hgs/Vamp7/Lrp12/Tgfbr2/Sdcbp/Pip4p2/Arhgap21/Syt4/Syt11/Met/Scamp1/Canx/Ankfy1/Mib1/Csnk1e/Ifitm3/Tfrc/Atp6v1h/Rhou/Rala/Ralb/Ezr/Ankrd13a/Ldlr/Lrp5/Vac14/Insr/Tm9sf4/Snx3/Ano6/Tyro3/Lman2/Itgb1/Sort1/Ldlrad3/Nedd4/Snx17/Tsg101/Ehd1/Rab34/Rab5c/Csnk1g2/Cd44/Csnk1g3/Esyt2/Rab5a/Add1/Atp5f1b/Snx12/Rhoj/Vps28/Snx5/Dnm2/Atad1/Snx1/Ehd4/Arf1/Rac1/Letmd1/Ptpn1/Scyl2/Dbnl/Grb2/Ackr3/Si…	100
GO:0006396	BP	GO:0006396	RNA processing	117/1480	930/28891	1.87182e-19	2.91029e-17	1.84941e-17	Srrm2/Slc38a2/Srsf9/Clk3/Cherp/Tra2b/Setx/Srsf5/Snrpb/Srsf6/Celf2/Ivns1abp/Snrpd1/Srsf10/Srrm1/Tra2a/Clns1a/Pdcd11/Magoh/Tyw1/Magohb/Srsf3/Cpsf1/Rngtt/Rbm6/Riok1/Prpf31/Thrap3/Ints6/Rbm10/Rbm17/Wdr33/U2surp/Snrnp200/Prmt5/Thada/U2af1/Pnn/Rbm5/Qki/Cwc22/Sf3b1/Nop9/Larp7/Fbl/Sf3b2/Ncbp3/Hspa8/Rbm25/Sf3b5/Wdr74/Zcchc8/Pcbp1/Cpsf2/Rpl10a/Wtap/Lyar/Snrpd3/Srpk1/Usp4/Exosc9/Wdr77/Sf3b3/Srrt/Taf15/Sfswa…	117
GO:0016482	BP	GO:0016482	cytosolic transport	44/1480	170/28891	1.91135e-19	2.91029e-17	1.84941e-17	Flna/Stx6/Syt4/Ankfy1/Vps35/Ezr/Snx3/Stx8/Gbf1/Sort1/Rhobtb3/Kif5b/Srsf10/Rab5a/Dennd2a/Map2k2/Snx12/Ptpn23/Snx8/Rab6a/Snx5/Vamp3/Snx1/Golt1b/Vps29/Vti1a/Vps26a/Vti1b/Vps26b/Snx6/Map2k1/Rdx/Trim27/Stx16/Arl1/Usp7/Mapk1/Snx2/Pik3c3/Dab2/Rab21/Gosr1/Gak/Hook3	44
GO:0070201	BP	GO:0070201	regulation of establishment of protein localization	90/1480	615/28891	2.15706e-19	3.20019e-17	2.03363e-17	Flna/Vamp7/Bcap31/Atp2c1/Chp1/Xpo1/Syt4/Wwp2/Ndfip1/Ipo5/Scfd1/Tmem30a/Tnfrsf1a/Gja1/Tmed10/Vps35/Neo1/Lrp5/Stom/Asph/Tm9sf4/Snx3/Acsl3/Cct8/Cct7/Adam9/Srebf1/Tsg101/Tm7sf3/Rab34/Kif5b/Slc12a2/Snx12/Gsk3b/Bag3/Ptpn23/Gna11/Ppia/Tmem132a/Vps28/Mavs/Erbb2/Wls/Kif20b/Gnaq/Slc16a1/Ptpn11/Psen1/Arf1/Rac1/Fis1/Fyn/Coro2b/Ptpn1/Cct4/Rab8a/Uqcc2/Xpo4/Myo1c/Psmd9/Anxa5/Efna5/Gnas/Cct3/Myo18a/Arf6/Prkaa1/T…	90
GO:0010975	BP	GO:0010975	regulation of neuron projection development	87/1480	583/28891	2.46695e-19	3.56845e-17	2.26765e-17	Tubb2b/Plxna1/Epha3/Flna/Plxnd1/Bmpr2/Nedd4l/Plxnb2/Ptprs/Ddr2/Ddr1/Ptprd/Vamp7/Ptprf/Kidins220/Plxna2/Met/Plxnb1/Itm2c/Plxna4/Adam10/Cers2/Tmem30a/Neo1/Bag5/Epha7/Adam17/Snx3/Retreg3/Itgb1/Igf1r/Setx/Sema4c/Nedd4/Ehd1/Cul7/Sema6a/Rhoa/Adamts1/Zdhhc15/Map2k2/Gsk3b/Adcy6/Ryk/Mob2/Ranbp1/Wls/Psen1/Prag1/Dync1i2/Cyfip1/Lrig2/Nrp1/Fyn/Dbnl/Sipa1l1/Cux2/Rtn4/Trpv2/Qki/Stau2/Lrp4/Dbn1/Rap2a/Map2k1/Efna…	87
GO:0007005	BP	GO:0007005	mitochondrion organization	86/1480	575/28891	3.45075e-19	4.86977e-17	3.0946e-17	Atp7a/Bcap31/Samm50/Pgam5/Chchd6/Pisd/Tfrc/Vps35/Rala/Vat1/Ndufs1/Timm23/Vdac2/Tomm40/Agk/Hspa4/Irgm1/Rab38/Fkbp8/Ndufa10/Srebf1/Mtx2/Chchd3/Mtch1/Immt/Acad9/Kif5b/Tomm22/Ndufa9/Man2a1/Gsk3b/Aifm1/Bag3/Bax/Vdac1/Timm17a/Ndufb10/Mrpl39/Uqcc1/Yme1l1/Micos13/Ndufs3/Dnajc11/Mtfr1l/Rhot2/Mtch2/Timm29/Fis1/Rab32/Letmd1/Inf2/Rhot1/Uqcc2/Afg3l1/Sqstm1/Ndufs7/Dnaja3/Prkaa1/Myo19/Myh14/Cdc37/Sco2/Msto1/Atp…	86
GO:0019725	BP	GO:0019725	cellular homeostasis	110/1480	861/28891	7.59263e-19	1.04597e-16	6.64688e-17	Flna/Slc12a7/Atp7a/Bcap31/Steap3/Slc4a2/Atp2c1/Chp1/Slc4a7/Atp1a1/Atp6v0d1/Atp2b1/Lrrc8a/Stxbp3/Ndfip1/Ccdc47/Atp13a3/Gaa/Atp1a4/Slc12a9/Atp2a2/Cnnm4/Tfrc/Atp6v1h/Aplp2/Neo1/Lrp5/Atp6v0a2/Asph/Hvcn1/Slc4a8/Tm9sf4/Ano6/Tyro3/Igf1r/Slc45a2/Atp6v1a/Slc12a4/Cherp/Tra2b/Rab38/Atp6v1b2/Atp1b3/Abcb6/Rab34/Immt/Kif5b/Lrrc8d/Add1/Atp6ap2/Slc12a2/Atp5f1b/Naglu/Atp6v1e1/Bag3/Bax/Clns1a/Trim32/Atp6v0a1/Slc30…	110
GO:0072659	BP	GO:0072659	protein localization to plasma membrane	60/1480	315/28891	8.42935e-19	1.13424e-16	7.20776e-17	Epha3/Flna/Vamp7/Tmem59/Mmp14/Atp2c1/Snx27/Tnfrsf1a/Stx7/Vps35/Ezr/Acsl3/Itgb1/Stx8/Stxbp1/Atp1b3/Ehd1/Rab34/Rab10/Kif5b/Ppp2r5a/Nectin3/Flot2/Adcy6/Rab8b/Vamp3/Ehd4/Sptbn1/Rac1/Palm/Rer1/Vti1b/Pgrmc1/Rab8a/Gga2/Golga7/Sqstm1/Rab31/Rap2a/Rdx/Myo5a/Tmed2/Arf6/Vamp4/Bsg/Actr3/Scrib/Cib1/Rab13/Rap1a/Myl12a/Pip5k1a/Bag4/Vps4a/Dab2/Sco1/Gak/Vamp5/Golph3/Dlg1	60
GO:0032386	BP	GO:0032386	regulation of intracellular transport	63/1480	346/28891	1.21435e-18	1.59687e-16	1.01477e-16	Flna/Vamp7/Bcap31/Chp1/Xpo1/Ipo5/Scfd1/Tmem30a/Tnfrsf1a/Vps35/Ezr/Stom/Asph/Tm9sf4/Snx3/Nedd4/Srebf1/Ehd1/Kif5b/Map2k2/Snx12/Gsk3b/Bag3/Ptpn23/Nus1/Dync1h1/Mavs/Erbb2/Kif20b/Rbm10/Ptpn11/Psen1/Arf1/Stx18/Arhgap1/Fis1/Fyn/Ptpn1/Rhot1/Xpo4/Dbn1/Myo1c/Map2k1/Rdx/Prkaa1/Arpc2/Use1/Cdk1/Emd/Yipf5/Actr3/Usp7/Thoc2/Ppp1cc/Cib1/Mapk1/Cep131/Ppp1r12a/Ubr5/Bag4/Dab2/Rab21/Nup153	63
GO:0007015	BP	GO:0007015	actin filament organization	75/1480	471/28891	1.90985e-18	2.45565e-16	1.5605e-16	Fat1/Flna/Daam2/Kirrel1/Met/Tgfbr1/Gja1/Rhou/Ezr/Ssh1/Sh3pxd2b/Capza2/Capza1/Rhoa/Add1/Tjp1/Cdc42ep1/Sorbs3/Pakap/Capzb/Phldb2/Rhoj/Rhob/Cul3/Rhoc/Zyx/Fam171a1/Cald1/Rhot2/Rhod/Arf1/Arpc1b/Cracd/Sptbn1/Rac1/Cyfip1/Nrp1/Coro2b/Arfgef1/Dbnl/Sptan1/Grb2/Flii/Rhot1/Gas2l3/Rnh1/Sirpa/Myo6/Hax1/Dbn1/Myo1c/Add3/Tpm4/Lima1/Rdx/Myo5a/Arf6/Myo19/Arpc2/Trim27/Arpc4/Myh10/Tmod3/Tpm3/Acta1/Actr3/Cap1/Myo1e/Pl…	75
GO:0032989	BP	GO:0032989	cellular component morphogenesis	111/1480	886/28891	2.27873e-18	2.86625e-16	1.82142e-16	Tubb2b/Ubb/Plxna1/Epha3/Unc5c/Plxnd1/Bmpr2/Nrp2/Nedd4l/Plxnb2/Ptprs/Ddr1/Ptprd/Atp7a/Vamp7/Ptprm/Ptprf/Kidins220/Syt4/Plxna2/Met/Plxnb1/Plxna4/Adam10/Gja1/Aplp2/Neo1/Epha7/Adam17/Pdgfra/Itgb1/Igf1r/Stxbp1/Sema4c/Nedd4/Cul7/Unc5b/Cd44/Rab10/Sema6a/Kif5b/Zdhhc15/Vangl2/Map2k2/Gsk3b/Bax/Phldb2/Ryk/Erbb2/Lgr4/Wls/Dnm2/Kif20b/Snx1/Ptpn11/Psen1/Gnpat/Boc/Ablim1/Rac1/Cyfip1/Fis1/Nrp1/Fyn/Dbnl/Sipa1l1/Pl…	111
GO:0007034	BP	GO:0007034	vacuolar transport	42/1480	165/28891	2.46787e-18	3.03811e-16	1.93063e-16	Hgs/Vamp7/Mgrn1/Gnptab/Stam/Atp6v0d1/Ndfip1/Snx27/Ankfy1/Stx7/Vps35/Stx8/Sort1/Irgm1/Nedd4/Tsg101/Rab34/M6pr/Ptpn23/Vps28/Vps37b/Rhob/Vps29/Vti1a/Arf1/Mvb12a/Vti1b/Scyl2/Sqstm1/Hspa8/Vps4b/Chmp5/Tmem106b/Lamp2/Zfyve16/Pik3c3/Chmp1a/Vta1/Vps4a/Gak/Hook3/Sptbn5	42
GO:0006091	BP	GO:0006091	generation of precursor metabolites and energy	76/1480	484/28891	2.55976e-18	3.08557e-16	1.9608e-16	Atp7a/Il6st/Tyrp1/Gaa/Ifnar1/Ndufs1/Prps2/Atp5pd/Prps1/Eno2/Insr/Gfpt1/Il10rb/Ndufa10/Rhoa/Galk1/Atp5f1b/Ndufa9/Gsk3b/Bax/Ndufb10/Uqcrq/Atp5f1a/Atp5pb/Atp5po/Uqcrfs1/Ndufs3/Ndufv1/Psen1/Mtfr1l/Suclg2/Mtch2/Ndufa4/Cox4i1/Uqcc2/Ndufs7/Gnas/Myo5a/Idh3a/Prkaa1/Pdhb/Pgk1/Cdk1/Acadm/Sco2/Uqcrc2/Ppp1cb/Cisd1/Atp5f1d/Idh3g/Ndufa13/Hk2/Ppp1ca/Ppp1cc/Atp5f1c/Ndufs8/Atp5mf/Pgd/Sdhb/Stoml2/Plec/Adsl/Mdh1/Ndu…	76
GO:1904951	BP	GO:1904951	positive regulation of establishment of protein localization	64/1480	362/28891	3.03955e-18	3.58915e-16	2.28081e-16	Flna/Bcap31/Atp2c1/Chp1/Ipo5/Tmem30a/Tnfrsf1a/Gja1/Tmed10/Vps35/Stom/Asph/Tm9sf4/Acsl3/Cct8/Cct7/Adam9/Tsg101/Tm7sf3/Rab34/Kif5b/Gsk3b/Bag3/Ptpn23/Gna11/Ppia/Tmem132a/Vps28/Mavs/Erbb2/Wls/Kif20b/Gnaq/Psen1/Arf1/Rac1/Fis1/Fyn/Coro2b/Cct4/Xpo4/Myo1c/Psmd9/Gnas/Cct3/Myo18a/Arf6/Prkaa1/Arpc2/Bsg/Cdk1/Myh10/Emd/Cct6a/Actr3/Prkar1a/Cib1/Mapk1/Cep131/Myh9/Ubr5/Ttn/Frmd4a/Golph3	64
GO:1902600	BP	GO:1902600	proton transmembrane transport	35/1480	117/28891	6.25493e-18	7.23821e-16	4.59968e-16	Atp7a/Chp1/Atp1a1/Atp6v0d1/Atp1a4/Atp6v1h/Atp6v0a2/Atp5pd/Hvcn1/Slc45a2/Atp6v1a/Atp6v1b2/Atp6ap2/Atp5f1b/Atp6v1e1/Atp5f1a/Atp5pb/Atp5po/Atp6v0a1/Atp6v1d/Atp6v1c1/Ndufa4/Ndufs7/Myo5a/Tmem175/Tcirg1/Atp6v0c/Slc9a8/Atp5f1d/Atp6v1g1/Atp5f1c/Atp5mf/Atp5me/Sco1/Atp5mc1	35
GO:0010498	BP	GO:0010498	proteasomal protein catabolic process	80/1480	537/28891	7.87542e-18	8.93474e-16	5.67778e-16	Ubb/Hspa1b/Itch/Nedd4l/Stub1/Wwp1/Bcap31/Marchf7/Xpo1/Ecpas/Wwp2/Aup1/Ccdc47/Canx/Rnf19a/Csnk1e/Hspbp1/Ubr2/Smurf2/Bag5/Ankib1/Gna12/Gid8/Plk1/Rnf144a/Rnf19b/Amfr/Klhl22/Erlin2/Rhobtb3/Dnajb12/Gsk3b/Naglu/Ppp2r5c/Cul3/Bag2/Man1a2/Ltn1/Dtl/Psen1/Cul2/Psen2/Plaa/Rffl/Psma3/Tmtc3/Eif3h/Usp5/Psme3/Faf2/Fbxl17/Sec61b/Cul1/Psma5/Man1b1/Eif2ak3/Trim21/Cul4a/Psmb4/H13/Psma2/Usp7/Rhbdd1/Nhlrc3/Psmb5/Erlin…	80
GO:0051129	BP	GO:0051129	negative regulation of cellular component organization	101/1480	780/28891	8.60444e-18	9.57409e-16	6.08407e-16	Epha3/Flna/Ptprs/Mmp14/Ptprf/Acvrl1/Sdcbp/Pip4p2/Syt4/Syt11/Met/Zw10/Itm2c/Scfd1/Cers2/Tnfrsf1a/Tfrc/Vps35/Neo1/Vat1/Ankrd13a/Ldlr/Ssh1/Vdac2/Bag5/Epha7/Dync1li1/Adam17/Snx3/Itgb1/Stxbp1/Capza2/Plk1/Sema4c/Irgm1/Capza1/Klhl22/Sema6a/Rhoa/Antxr1/Tbcd/Add1/Tjp1/Sec22b/Gsk3b/Capzb/Hspa2/Phldb2/Adcy6/Ryk/Dnm2/Psen1/Prag1/Dync1i2/Cracd/Sptbn1/Lrig2/Nrp1/Fyn/Coro2b/Raf1/Tmc8/Arfgef1/Sptan1/Rtn4/Pgrmc1/…	101
GO:0060627	BP	GO:0060627	regulation of vesicle-mediated transport	87/1480	618/28891	1.03565e-17	1.13062e-15	7.18479e-16	Epha3/Nedd4l/Hgs/Vamp7/Atp2c1/Sdcbp/Pip4p2/Arhgap21/Stxbp2/Stam/Stxbp3/Syt4/Syt11/Scfd1/Ankfy1/Atp2a2/Mib1/Rala/Ezr/Ankrd13a/Vac14/Slc4a8/Lgals9/Dync1li1/Insr/Snx3/Acsl3/Ano6/Lman2/Itgb1/Stxbp1/Nedd4/Pdcd6ip/Tsg101/Ehd1/Rab5c/Kif5b/Rab5a/Add1/Map2k2/Snx12/Ptpn23/Vps28/Rab8b/Dnm2/Atad1/Psen1/Ehd4/Arf1/Stx18/Arhgap1/Letmd1/Ptpn1/Scyl2/Rab8a/Sirpa/Rab5b/Rab31/Map2k1/Rdx/Myo5a/Myo18a/Vps4b/Prkaa1/Snx…	87
GO:0006397	BP	GO:0006397	mRNA processing	76/1480	496/28891	1.06242e-17	1.13836e-15	7.23396e-16	Srrm2/Srsf9/Tra2b/Setx/Srsf5/Snrpb/Srsf6/Celf2/Snrpd1/Srsf10/Srrm1/Tra2a/Clns1a/Magoh/Magohb/Srsf3/Cpsf1/Rngtt/Rbm6/Prpf31/Thrap3/Rbm10/Rbm17/Wdr33/Snrnp200/Prmt5/U2af1/Pnn/Rbm5/Qki/Cwc22/Sf3b1/Larp7/Sf3b2/Ncbp3/Hspa8/Rbm25/Sf3b5/Zcchc8/Pcbp1/Cpsf2/Wtap/Snrpd3/Srpk1/Usp4/Wdr77/Sf3b3/Srrt/Sfswap/Hnrnph1/Prpf38a/Ahcyl1/Thoc2/Prpf8/Snrpa/Virma/Prpf4b/Thoc6/Tbrg4/Ddx41/Rbfox2/Hnrnpa3/Ppie/Ppp1r8/Zmat…	76
GO:0000910	BP	GO:0000910	cytokinesis	44/1480	188/28891	1.23529e-17	1.29953e-15	8.25815e-16	Usp8/Igf1r/Plk1/Pdcd6ip/Cul7/Pkp4/Stambp/Rhoa/Rab35/Klhl13/Stx2/Rhob/Cul3/Rhoc/Kif20b/Cep55/Arf1/Sptbn1/Vps4b/Pin1/Chmp5/Myo19/Snx33/Exoc1/Exoc4/Orc4/Myh10/Actr3/Cenpv/Ist1/Exoc8/Exoc2/Plec/Myh9/Gipc1/Cetn2/Pik3c3/Flcn/Chmp1a/Vps4a/Birc6/Septin2/Cfl1/Septin11	44
GO:0006890	BP	GO:0006890	retrograde vesicle-mediated transport, Golgi to endoplasmic reticulum	22/1480	44/28891	2.48118e-17	2.56359e-15	1.62909e-15	Scfd1/Lman2/Gbf1/Arf4/Sec22b/Rab6a/Copa/Arf5/Cope/Arf3/Stx18/Rer1/Copb2/Arcn1/Tmem115/Ergic1/Use1/Cog7/Copz1/Cog3/Cog4/Golph3	22
GO:0042176	BP	GO:0042176	regulation of protein catabolic process	63/1480	369/28891	3.3149e-17	3.27537e-15	2.08141e-15	Ubb/Hspa1b/Flna/Itch/Nedd4l/Stub1/Usp8/Bcap31/Marchf7/Xpo1/Ndfip1/Rnf19a/Csnk1e/Gja1/Hspbp1/Vps35/Ezr/Ldlr/Bag5/Snx3/Ankib1/Gna12/Adam9/Plk1/Rnf144a/Rnf19b/Nedd4/Snx12/Sec22b/Gsk3b/Tmem132a/Vps28/Bag2/Trim32/Laptm4b/Snx1/Dtl/Psen1/Lrig2/Fyn/Psen2/Tmem9/Tmtc3/Eif3h/Usp5/Rdx/Pin1/Psme3/Snx33/Lpcat1/Sf3b3/Eif2ak3/Cul4a/Usp7/Ndufa13/Rhbdd1/Araf/Pacsin3/Gipc1/Ppp2ca/Usp19/Dab2/Sco1	63
GO:0006913	BP	GO:0006913	nucleocytoplasmic transport	62/1480	359/28891	3.3399e-17	3.27537e-15	2.08141e-15	Flna/Chp1/Xpo1/Tnpo1/Ipo5/Adam10/Ipo7/Cse1l/Tnpo3/Tnfrsf1a/Nup210/Pom121/Aaas/Xpo5/Nedd4/Nup188/Ipo11/Xpot/Ndc1/Gsk3b/Ipo9/Rab18/Bag3/Magoh/Magohb/Nup93/Srsf3/Mavs/Ranbp1/Rbm10/Xpo7/Ptpn11/Psen1/Nop9/Xpo4/Sqstm1/Ncbp3/Rae1/Phax/Cdk1/Ipo8/Kpna2/Emd/Ahcyl1/Thoc2/Nup107/Ppp1cc/Mapk1/Thoc6/Nup43/Nup37/Kpna3/Ppp1r12a/Ythdc1/Ubr5/Tsc2/Ddx19a/Thoc3/Eif6/Cfl1/Atf2/Nup153	62
GO:0051169	BP	GO:0051169	nuclear transport	62/1480	359/28891	3.3399e-17	3.27537e-15	2.08141e-15	Flna/Chp1/Xpo1/Tnpo1/Ipo5/Adam10/Ipo7/Cse1l/Tnpo3/Tnfrsf1a/Nup210/Pom121/Aaas/Xpo5/Nedd4/Nup188/Ipo11/Xpot/Ndc1/Gsk3b/Ipo9/Rab18/Bag3/Magoh/Magohb/Nup93/Srsf3/Mavs/Ranbp1/Rbm10/Xpo7/Ptpn11/Psen1/Nop9/Xpo4/Sqstm1/Ncbp3/Rae1/Phax/Cdk1/Ipo8/Kpna2/Emd/Ahcyl1/Thoc2/Nup107/Ppp1cc/Mapk1/Thoc6/Nup43/Nup37/Kpna3/Ppp1r12a/Ythdc1/Ubr5/Tsc2/Ddx19a/Thoc3/Eif6/Cfl1/Atf2/Nup153	62
GO:0051223	BP	GO:0051223	regulation of protein transport	83/1480	586/28891	4.12363e-17	3.97655e-15	2.52699e-15	Flna/Vamp7/Bcap31/Atp2c1/Chp1/Xpo1/Syt4/Wwp2/Ndfip1/Ipo5/Scfd1/Tmem30a/Tnfrsf1a/Gja1/Tmed10/Vps35/Neo1/Lrp5/Stom/Asph/Tm9sf4/Snx3/Acsl3/Adam9/Srebf1/Tsg101/Tm7sf3/Rab34/Kif5b/Slc12a2/Snx12/Gsk3b/Bag3/Ptpn23/Gna11/Ppia/Tmem132a/Vps28/Mavs/Erbb2/Wls/Kif20b/Gnaq/Slc16a1/Ptpn11/Psen1/Arf1/Rac1/Fis1/Fyn/Ptpn1/Rab8a/Uqcc2/Xpo4/Myo1c/Psmd9/Anxa5/Efna5/Gnas/Myo18a/Arf6/Prkaa1/Tcirg1/Arpc2/Vamp4/Bsg/Exoc4…	83
GO:0071363	BP	GO:0071363	cellular response to growth factor stimulus	91/1480	680/28891	4.80423e-17	4.55693e-15	2.8958e-15	Bmpr2/Notch2/Nrp2/Hgs/Atp7a/Stub1/Usp8/Tgfbr2/Acvr2a/Ptprf/Acvrl1/Sdcbp/Kidins220/Slc4a7/Acvr1/Bmpr1a/Tgfbr1/Spred1/Usp15/Neo1/Eng/Smurf2/Lgals9/Dync1li1/Insr/Adam17/Pdgfra/Adam9/Igf1r/Sort1/Setx/Acvr1b/Nedd4/Fkbp8/Ptprk/Ehd1/Cd44/Sema6a/Rab35/Gsk3b/Tab1/Nus1/Acvr2b/Erbb2/Zyx/Dnm2/Snx1/Myof/Ptpn11/Ehd4/Frs2/Cyfip1/Nrp1/Fyn/Ptpn1/Raf1/Grb2/Stk16/Gpc1/Dbn1/Myo1c/Spred2/Snx6/Yes1/Pin1/Ilk/Arf6/Arpc2…	91
GO:0007167	BP	GO:0007167	enzyme-linked receptor protein signaling pathway	116/1480	988/28891	5.31885e-17	4.96369e-15	3.15428e-15	Epha3/Bmpr2/Notch2/Nrp2/Hgs/Ptpra/Ddr2/Ddr1/Stub1/Il6st/Erbb3/Tgfbr2/Acvr2a/Ptprf/Acvrl1/Sdcbp/Ephb4/Acvr1/Met/Bmpr1a/Tgfbr1/Spred1/Usp15/Kit/Rala/Ralb/Neo1/Eng/Smurf2/Epha7/Lgals9/Insr/Adam17/Tyro3/Pdgfra/Adam9/Frk/Igf1r/Lnpep/Sort1/Setx/Acvr1b/Nedd4/Fkbp8/Srebf1/Ptprk/Tsg101/Arf4/Sema6a/Map2k2/Gsk3b/Pakap/Tab1/Nus1/Nup93/Srsf3/Acvr2b/Tyk2/Ryk/Snx5/Erbb2/Zyx/Dnm2/Snx1/Myof/Ptpn11/Psen1/Adipor1/F…	116
GO:0032990	BP	GO:0032990	cell part morphogenesis	99/1480	777/28891	5.49982e-17	5.0511e-15	3.20983e-15	Tubb2b/Ubb/Plxna1/Epha3/Unc5c/Plxnd1/Bmpr2/Nrp2/Nedd4l/Plxnb2/Ptprs/Ddr1/Ptprd/Atp7a/Vamp7/Ptprm/Ptprf/Kidins220/Syt4/Plxna2/Met/Plxnb1/Plxna4/Adam10/Gja1/Aplp2/Neo1/Epha7/Adam17/Itgb1/Igf1r/Stxbp1/Sema4c/Nedd4/Cul7/Unc5b/Cd44/Rab10/Sema6a/Kif5b/Zdhhc15/Vangl2/Map2k2/Gsk3b/Bax/Ryk/Erbb2/Lgr4/Wls/Dnm2/Kif20b/Snx1/Ptpn11/Psen1/Boc/Ablim1/Rac1/Cyfip1/Fis1/Nrp1/Fyn/Dbnl/Sipa1l1/Plaa/Cux2/Rtn4/Trpv2/R…	99
GO:0070848	BP	GO:0070848	response to growth factor	92/1480	695/28891	6.47514e-17	5.85393e-15	3.72001e-15	Bmpr2/Notch2/Nrp2/Hgs/Atp7a/Stub1/Usp8/Tgfbr2/Acvr2a/Ptprf/Acvrl1/Sdcbp/Kidins220/Slc4a7/Acvr1/Bmpr1a/Tgfbr1/Spred1/Usp15/Neo1/Eng/Smurf2/Lgals9/Dync1li1/Insr/Adam17/Pdgfra/Adam9/Igf1r/Sort1/Setx/Acvr1b/Nedd4/Fkbp8/Ptprk/Ehd1/Cd44/Sema6a/Rab35/Gsk3b/Tab1/Nus1/Acvr2b/Erbb2/Zyx/Dnm2/Snx1/Myof/Ptpn11/Ehd4/Frs2/Cyfip1/Nrp1/Fyn/Ptpn1/Raf1/Grb2/Stk16/Gpc1/Dbn1/Myo1c/Spred2/Snx6/Yes1/Pin1/Ilk/Arf6/Arpc2…	92
GO:0008380	BP	GO:0008380	RNA splicing	70/1480	449/28891	8.3517e-17	7.35917e-15	4.67655e-15	Srrm2/Slc38a2/Srsf9/Clk3/Tra2b/Setx/Srsf5/Snrpb/Srsf6/Celf2/Ivns1abp/Snrpd1/Srsf10/Srrm1/Tra2a/Clns1a/Magoh/Magohb/Srsf3/Rbm6/Prpf31/Thrap3/Rbm10/Rbm17/Snrnp200/Prmt5/U2af1/Pnn/Rbm5/Qki/Cwc22/Sf3b1/Larp7/Sf3b2/Hspa8/Rbm25/Sf3b5/Zcchc8/Wtap/Snrpd3/Srpk1/Usp4/Wdr77/Sf3b3/Taf15/Sfswap/Hnrnph1/Prpf38a/Thoc2/Hnrnph3/Fus/Prpf8/Snrpa/Virma/Prpf4b/Thoc6/Ddx41/Rbfox2/Hnrnpa3/Ppie/Ppp1r8/Tmbim6/Zmat2/Ythdc…	70
GO:0031647	BP	GO:0031647	regulation of protein stability	57/1480	316/28891	8.39449e-17	7.35917e-15	4.67655e-15	Flna/Nedd4l/Stub1/Usp8/Rnf149/Marchf7/Stx12/Chp1/Vps35/Morc3/Asph/Bag5/Ncln/Cct8/Cct7/Ddost/Stxbp1/Plk1/Irgm1/Srebf1/Atp1b3/Ipo9/Bag3/Wiz/Flot2/Rnf128/Cul3/Bag2/Gnaq/Cct4/Rtn4/Golga7/Dnaja3/Hspa8/Cct3/Pin1/Bag1/Usp4/Cdc37/Cog7/Smad7/Glmp/Trim21/Cct6a/Lamp2/Usp7/Gnl3l/Pfn1/Gipc1/Telo2/Ubr5/Usp19/Bag4/Cog3/Rab21/Fbxw11/Cdc73	57
GO:0015980	BP	GO:0015980	energy derivation by oxidation of organic compounds	60/1480	350/28891	1.55161e-16	1.33995e-14	8.51498e-15	Atp7a/Il6st/Gaa/Ifnar1/Ndufs1/Atp5pd/Insr/Gfpt1/Il10rb/Ndufa10/Rhoa/Atp5f1b/Ndufa9/Gsk3b/Bax/Ndufb10/Uqcrq/Atp5f1a/Atp5pb/Atp5po/Uqcrfs1/Ndufs3/Ndufv1/Mtfr1l/Suclg2/Mtch2/Cox4i1/Uqcc2/Ndufs7/Gnas/Idh3a/Pdhb/Cdk1/Acadm/Sco2/Uqcrc2/Ppp1cb/Cisd1/Atp5f1d/Idh3g/Ndufa13/Ppp1ca/Ppp1cc/Atp5f1c/Ndufs8/Atp5mf/Sdhb/Stoml2/Plec/Adsl/Mdh1/Ndufa12/Flcn/Ndufa6/Nipsnap2/Idh1/Atp5me/Shmt2/Ndufaf1/Uqcrh	60
GO:0045333	BP	GO:0045333	cellular respiration	50/1480	254/28891	1.67033e-16	1.42125e-14	9.03167e-15	Atp7a/Ifnar1/Ndufs1/Atp5pd/Il10rb/Ndufa10/Rhoa/Atp5f1b/Ndufa9/Bax/Ndufb10/Uqcrq/Atp5f1a/Atp5pb/Atp5po/Uqcrfs1/Ndufs3/Ndufv1/Mtfr1l/Suclg2/Mtch2/Cox4i1/Uqcc2/Ndufs7/Idh3a/Pdhb/Cdk1/Sco2/Uqcrc2/Cisd1/Atp5f1d/Idh3g/Ndufa13/Atp5f1c/Ndufs8/Atp5mf/Sdhb/Stoml2/Plec/Adsl/Mdh1/Ndufa12/Flcn/Ndufa6/Nipsnap2/Idh1/Atp5me/Shmt2/Ndufaf1/Uqcrh	50
GO:0051301	BP	GO:0051301	cell division	86/1480	635/28891	1.73424e-16	1.45425e-14	9.24134e-15	Usp8/Dct/Zw10/Rala/Ralb/Dync1li1/Igf1r/Plk1/Pdcd6ip/Tsg101/Cul7/Pkp4/Klhl22/Stambp/Rab10/Rhoa/Rab35/Cdk2/Vangl2/Klhl13/Stx2/Epb41/Rhob/Cul3/Dync1h1/Ppp2r2d/Rhoc/Kif20b/Cep55/Arf1/Triobp/Sptbn1/Pds5b/Vps4b/Pin1/Rae1/Chmp5/Arf6/Zwilch/Ccdc124/Myo19/Snx33/Exoc1/Ccnb2/Lzts2/Smc2/Smc4/Exoc4/Cdk1/Orc4/Myh10/Ppp1cb/Arl8a/Gpsm2/Cdca3/Fzd7/Zc3hc1/Actr3/Ncapd2/Thoc2/Ppp1ca/Ppp1cc/Cenpv/Cib1/Ist1/Exoc8/Nup4…	86
GO:0000278	BP	GO:0000278	mitotic cell cycle	107/1480	891/28891	1.93754e-16	1.60151e-14	1.01772e-14	Tubb2b/Hspa1b/Tuba4a/Flna/Ddr2/Usp8/Sdcbp/Abcb1b/Acvr1/Brox/Met/Zw10/Rhou/Cdk17/Rpa2/Dync1li1/Insr/Adam17/Ctdspl/Aaas/Itgb1/Igf1r/Gbf1/Plk1/Acvr1b/Pdcd6ip/Cul7/Klhl22/Tk1/Ctdsp2/Stambp/Rhoa/Pcna/Ctdsp1/Rab35/Adamts1/Tbcd/Cdk2/Ncapg/Ppp6c/Hspa2/Cdk18/Stx2/Ppp2r5c/Rhob/Cul3/Dync1h1/Ranbp1/Nle1/Rhoc/Dapk3/Kif20b/Cep55/Dtl/Ptpn11/Rpa3/Arf1/Sptbn1/Akap8/Larp7/Rdx/Vps4b/Rae1/Chmp5/Asns/Tfap4/Zwilch/Psm…	107
GO:0000375	BP	GO:0000375	RNA splicing, via transesterification reactions	55/1480	304/28891	2.55028e-16	2.02136e-14	1.28452e-14	Srrm2/Srsf9/Tra2b/Setx/Srsf5/Snrpb/Srsf6/Celf2/Snrpd1/Srsf10/Srrm1/Tra2a/Clns1a/Magoh/Magohb/Srsf3/Rbm6/Prpf31/Thrap3/Rbm10/Rbm17/Snrnp200/Prmt5/U2af1/Rbm5/Qki/Cwc22/Sf3b1/Larp7/Sf3b2/Hspa8/Rbm25/Sf3b5/Wtap/Snrpd3/Srpk1/Usp4/Wdr77/Sf3b3/Sfswap/Prpf38a/Prpf8/Snrpa/Prpf4b/Ddx41/Rbfox2/Hnrnpa3/Ppie/Zmat2/Ythdc1/Sf3b4/Mbnl1/Ptbp2/Zrsr2/Snrpn	55
GO:0000377	BP	GO:0000377	RNA splicing, via transesterification reactions with bulged adenosine as nucleophile	55/1480	304/28891	2.55028e-16	2.02136e-14	1.28452e-14	Srrm2/Srsf9/Tra2b/Setx/Srsf5/Snrpb/Srsf6/Celf2/Snrpd1/Srsf10/Srrm1/Tra2a/Clns1a/Magoh/Magohb/Srsf3/Rbm6/Prpf31/Thrap3/Rbm10/Rbm17/Snrnp200/Prmt5/U2af1/Rbm5/Qki/Cwc22/Sf3b1/Larp7/Sf3b2/Hspa8/Rbm25/Sf3b5/Wtap/Snrpd3/Srpk1/Usp4/Wdr77/Sf3b3/Sfswap/Prpf38a/Prpf8/Snrpa/Prpf4b/Ddx41/Rbfox2/Hnrnpa3/Ppie/Zmat2/Ythdc1/Sf3b4/Mbnl1/Ptbp2/Zrsr2/Snrpn	55
GO:0000398	BP	GO:0000398	mRNA splicing, via spliceosome	55/1480	304/28891	2.55028e-16	2.02136e-14	1.28452e-14	Srrm2/Srsf9/Tra2b/Setx/Srsf5/Snrpb/Srsf6/Celf2/Snrpd1/Srsf10/Srrm1/Tra2a/Clns1a/Magoh/Magohb/Srsf3/Rbm6/Prpf31/Thrap3/Rbm10/Rbm17/Snrnp200/Prmt5/U2af1/Rbm5/Qki/Cwc22/Sf3b1/Larp7/Sf3b2/Hspa8/Rbm25/Sf3b5/Wtap/Snrpd3/Srpk1/Usp4/Wdr77/Sf3b3/Sfswap/Prpf38a/Prpf8/Snrpa/Prpf4b/Ddx41/Rbfox2/Hnrnpa3/Ppie/Zmat2/Ythdc1/Sf3b4/Mbnl1/Ptbp2/Zrsr2/Snrpn	55
GO:0022604	BP	GO:0022604	regulation of cell morphogenesis	52/1480	277/28891	3.36988e-16	2.63489e-14	1.6744e-14	Plxna1/Plxnd1/Nedd4l/Plxnb2/Myo10/Ptprd/Vamp7/Ptprf/Syt4/Plxna2/Met/Plxnb1/Plxna4/Rhou/Kit/Ezr/Gna13/Gna12/Cul7/Cd44/Cdc42ep1/Pakap/Capzb/Rhoj/Epb41/Wls/Dapk3/Fam171a1/Prag1/Rac1/Cyfip1/Palm/Fyn/Dbnl/Plaa/Cux2/Stau2/Dbn1/Efna5/Rdx/Ilk/Myh14/Myh10/Slc23a2/Actr3/Arhgdia/Myl12a/Sparc/Myh9/Rab21/Cfl1/Dlg1	52
GO:0009060	BP	GO:0009060	aerobic respiration	43/1480	196/28891	3.62847e-16	2.79925e-14	1.77884e-14	Atp7a/Ndufs1/Atp5pd/Ndufa10/Rhoa/Atp5f1b/Ndufa9/Ndufb10/Uqcrq/Atp5f1a/Atp5pb/Atp5po/Uqcrfs1/Ndufs3/Ndufv1/Mtfr1l/Suclg2/Mtch2/Cox4i1/Uqcc2/Ndufs7/Idh3a/Pdhb/Cdk1/Uqcrc2/Atp5f1d/Idh3g/Ndufa13/Atp5f1c/Ndufs8/Atp5mf/Sdhb/Stoml2/Adsl/Mdh1/Ndufa12/Ndufa6/Nipsnap2/Idh1/Atp5me/Shmt2/Ndufaf1/Uqcrh	43
GO:0097435	BP	GO:0097435	supramolecular fiber organization	102/1480	838/28891	4.11429e-16	3.13227e-14	1.99047e-14	Fat1/Flna/Ddr2/Atp7a/Daam2/Usp8/Kirrel1/Chp1/Met/Tgfbr1/Gja1/Rhou/Ezr/Ldlr/Ssh1/Sh3pxd2b/Pdgfra/Itgb1/Capza2/Capza1/Rhoa/Tbcd/Add1/Tjp1/Cdc42ep1/Sorbs3/Pakap/Capzb/Bax/Phldb2/B4galt7/Rhoj/Rhob/Cul3/Dync1h1/Rhoc/Zyx/Dapk3/Fam171a1/Cald1/Slain2/Psen1/Rhot2/Rhod/Arf1/Arpc1b/Cracd/Sptbn1/Rac1/Cyfip1/Nrp1/Coro2b/Arfgef1/Dbnl/Sptan1/Grb2/Flii/Rhot1/Gas2l3/Rnh1/Sirpa/Myo6/Hax1/Dbn1/Myo1c/Krt90/Add3/Tpm4…	102
GO:0032535	BP	GO:0032535	regulation of cellular component size	65/1480	411/28891	5.21996e-16	3.92242e-14	2.49259e-14	Bmpr2/Slc12a7/Ptprs/Atp7a/Daam2/Kirrel1/Lrrc8a/Plxna4/Slc12a9/Ezr/Ssh1/Epha7/Ano6/Slc12a4/Capza2/Sema4c/Capza1/Sema6a/Rhoa/Rab5a/Add1/Slc12a2/Cdc42ep1/Gsk3b/Capzb/Clns1a/Ryk/Dnm2/Cracd/Sptbn1/Rac1/Cyfip1/Wdtc1/Dnajc16/Nrp1/Inf2/Arfgef1/Dbnl/Sptan1/Grb2/Rtn4/Trpv2/Flii/Hax1/Dbn1/Myo1c/Add3/Stk39/Efna5/Lima1/Rdx/Ilk/Arf6/Arpc2/Tmod3/Actr3/Ist1/Rpl4/Pfn1/Pex11b/Tsc2/Bag4/Rab21/Cfl1/Dlg1	65
GO:0051493	BP	GO:0051493	regulation of cytoskeleton organization	75/1480	526/28891	9.70203e-16	7.19692e-14	4.57344e-14	Epha3/Hspa1b/Flna/Daam2/Slc4a2/Kirrel1/Capn6/Met/Plxnb1/Tgfbr1/Gja1/Rala/Ssh1/Hsph1/Sh3pxd2b/Capza2/Plk1/Capza1/Rhoa/Tbcd/Vangl2/Add1/Tjp1/Cdc42ep1/Gsk3b/Sorbs3/Capzb/Phldb2/Dync1h1/Rhoc/Dapk3/Slain2/Rhod/Arf1/Cracd/Sptbn1/Rac1/Cyfip1/Nrp1/Coro2b/Arfgef1/Dbnl/Sptan1/Grb2/Flii/Rnh1/Stau2/Hax1/Dbn1/Myo1c/Add3/Efna5/Lima1/Rdx/Vps4b/Rae1/Ilk/Chmp5/Arf6/Prkaa1/Arpc2/Trim27/Tmod3/Gpsm2/Actr3/Cib1/Drg1/…	75
GO:0009100	BP	GO:0009100	glycoprotein metabolic process	59/1480	354/28891	1.04767e-15	7.67315e-14	4.87608e-14	Atp7a/Tmem59/Gnptab/Chp1/Galnt1/Chsy3/Tm9sf2/Itm2c/Rab1b/Galnt2/Bace2/Alg2/Stt3a/Insr/Gfpt1/Ddost/Chpf/Itm2a/Galnt7/Dhdds/St3gal6/Vangl2/Glce/Mlec/Man2a1/Mgat5/Naglu/Hs2st1/Rpn1/B4galt7/Ncstn/Nus1/Alg5/Man1a2/Soat1/Psen1/Itm2b/Arfgef1/Gpc1/Npc1/Galnt13/Tmtc3/Gxylt2/Fam20b/Man1b1/Slc35b2/Cog7/Dpm1/Rpn2/St6galnac4/St3gal4/Mgat4b/Fbxo6/Cog3/Krtcap2/Ostc/Alg3/Pomk/Golph3	59
GO:0048858	BP	GO:0048858	cell projection morphogenesis	94/1480	753/28891	1.27235e-15	9.20225e-14	5.84777e-14	Tubb2b/Ubb/Plxna1/Epha3/Unc5c/Plxnd1/Bmpr2/Nrp2/Nedd4l/Plxnb2/Ptprs/Ddr1/Ptprd/Atp7a/Vamp7/Ptprm/Ptprf/Kidins220/Syt4/Plxna2/Met/Plxnb1/Plxna4/Adam10/Gja1/Aplp2/Neo1/Epha7/Adam17/Itgb1/Igf1r/Stxbp1/Sema4c/Nedd4/Cul7/Unc5b/Cd44/Rab10/Sema6a/Kif5b/Zdhhc15/Vangl2/Map2k2/Gsk3b/Ryk/Erbb2/Lgr4/Wls/Dnm2/Kif20b/Snx1/Ptpn11/Psen1/Boc/Ablim1/Rac1/Cyfip1/Nrp1/Fyn/Dbnl/Sipa1l1/Plaa/Cux2/Rtn4/Trpv2/Rab8a/Stau…	94
GO:0051222	BP	GO:0051222	positive regulation of protein transport	58/1480	346/28891	1.40646e-15	1.00466e-13	6.38435e-14	Flna/Bcap31/Atp2c1/Chp1/Ipo5/Tmem30a/Tnfrsf1a/Gja1/Tmed10/Vps35/Stom/Asph/Tm9sf4/Acsl3/Adam9/Tsg101/Tm7sf3/Rab34/Kif5b/Gsk3b/Bag3/Ptpn23/Gna11/Ppia/Tmem132a/Vps28/Mavs/Erbb2/Wls/Kif20b/Gnaq/Psen1/Arf1/Rac1/Fis1/Fyn/Xpo4/Myo1c/Psmd9/Gnas/Myo18a/Arf6/Prkaa1/Arpc2/Bsg/Cdk1/Myh10/Emd/Actr3/Prkar1a/Cib1/Mapk1/Cep131/Myh9/Ubr5/Ttn/Frmd4a/Golph3	58
GO:0031346	BP	GO:0031346	positive regulation of cell projection organization	69/1480	463/28891	1.4646e-15	1.03344e-13	6.56722e-14	Tubb2b/Plxna1/Epha3/Flna/Plxnd1/Bmpr2/Plxnb2/Ddr2/Ddr1/Ptprd/Atp7a/Vamp7/Ptprf/Kidins220/Plxna2/Met/Plxnb1/Tgfbr1/Plxna4/Tmem30a/Kit/Rala/Adam17/Snx3/Retreg3/Itgb1/Igf1r/Setx/Ehd1/Cul7/Adamts1/Zdhhc15/Cdc42ep1/Map2k2/Gsk3b/Mob2/Ranbp1/Rab8b/Wls/Dnm2/Rac1/Cyfip1/Nrp1/Palm/Fyn/Dbnl/Cux2/Trpv2/Qki/Stau2/Dbn1/Map2k1/Efna5/Ilk/Arpc2/Tmem106b/Tapt1/Ppp2r5d/Actr3/Rap1a/Ist1/Itga6/Rpl4/Pfn1/Gpm6a/Fig4/Ts…	69
GO:0061640	BP	GO:0061640	cytoskeleton-dependent cytokinesis	31/1480	108/28891	1.75049e-15	1.22028e-13	7.75457e-14	Usp8/Plk1/Pdcd6ip/Cul7/Stambp/Rhoa/Rab35/Stx2/Rhob/Rhoc/Kif20b/Cep55/Arf1/Sptbn1/Vps4b/Chmp5/Snx33/Exoc1/Exoc4/Orc4/Myh10/Actr3/Ist1/Exoc8/Exoc2/Plec/Chmp1a/Vps4a/Septin2/Cfl1/Septin11	31
GO:0120039	BP	GO:0120039	plasma membrane bounded cell projection morphogenesis	93/1480	746/28891	1.97283e-15	1.35891e-13	8.63548e-14	Tubb2b/Ubb/Plxna1/Epha3/Unc5c/Plxnd1/Bmpr2/Nrp2/Nedd4l/Plxnb2/Ptprs/Ddr1/Ptprd/Atp7a/Vamp7/Ptprm/Ptprf/Kidins220/Syt4/Plxna2/Met/Plxnb1/Plxna4/Adam10/Gja1/Aplp2/Neo1/Epha7/Adam17/Itgb1/Igf1r/Stxbp1/Sema4c/Nedd4/Cul7/Unc5b/Cd44/Rab10/Sema6a/Kif5b/Zdhhc15/Vangl2/Map2k2/Gsk3b/Ryk/Erbb2/Lgr4/Wls/Dnm2/Kif20b/Snx1/Ptpn11/Psen1/Boc/Ablim1/Rac1/Cyfip1/Nrp1/Fyn/Dbnl/Sipa1l1/Plaa/Cux2/Rtn4/Trpv2/Rab8a/Stau…	93
GO:0016071	BP	GO:0016071	mRNA metabolic process	93/1480	747/28891	2.14418e-15	1.45956e-13	9.27508e-14	Flna/Srrm2/Srsf9/Tra2b/Setx/Srsf5/Snrpb/Srebf1/Srsf6/Celf2/Snrpd1/Srsf10/Srrm1/Tra2a/Clns1a/Magoh/Magohb/Srsf3/Cpsf1/Rngtt/Rbm6/Prpf31/Thrap3/Rbm10/Rbm17/Wdr33/Snrnp200/Prmt5/U2af1/Pnn/Rbm5/Qki/Cwc22/Sf3b1/Larp7/Sf3b2/Ncbp3/Hspa8/Rbm25/Sf3b5/Zcchc8/Pcbp1/Taf4/Cpsf2/Wtap/Snrpd3/Srpk1/Usp4/Exosc9/Wdr77/Sf3b3/Srrt/Taf15/Sfswap/Hnrnph1/Exosc5/Prpf38a/Ahcyl1/Thoc2/Fus/Prpf8/Snrpa/Exosc7/Cnot9/Virma/Pr…	93
GO:0050808	BP	GO:0050808	synapse organization	77/1480	557/28891	2.2277e-15	1.49877e-13	9.52429e-14	Epha3/Flna/Plxnd1/Nrp2/Plxnb2/Ptprs/Ptprd/Adgrl2/Ptprf/Sdcbp/Plxnb1/Plxna4/Adam10/Snx27/Il1rap/Vps35/Ezr/Ssh1/Epha7/Insr/Itgb1/Igf1r/Sort1/Nedd4/Arf4/Rhoa/Zdhhc15/Gsk3b/Abhd17b/Stk38l/Rhob/Erbb2/Chd4/Rapsn/Psen1/Gnpat/Arf1/Rac1/Cyfip1/Nrp1/Palm/Fyn/Abhd17c/Rer1/Psen2/Dbnl/Sipa1l1/Cux2/Pgrmc1/Stau2/Abhd17a/Lrp4/Myo6/Dbn1/Adgre5/Rap2a/Efna5/Dnaja3/Hspa8/Myo5a/Pin1/Rheb/Arf6/Clstn1/Stk38/Myh10/Actr3…	77
GO:0051656	BP	GO:0051656	establishment of organelle localization	71/1480	491/28891	2.75988e-15	1.83548e-13	1.1664e-13	Ubb/Hgs/Vamp7/Steap3/Sdcbp/Chp1/Arhgap21/Stxbp2/Stam/Xpo1/Syt4/Syt11/Zw10/Stard3/Preb/Tmed10/Kit/Ezr/Mreg/Actr10/Itgb1/Gbf1/Stxbp1/Plk1/Pdcd6ip/Tsg101/Tmed9/Kif5b/Naglu/Cul3/Dync1h1/Rbm10/Psen1/Rhot2/Arf1/Copg1/Rhot1/Nop9/Myo6/Myo1c/Map2k1/Myo5a/Vps4b/Chmp5/Tcirg1/Copg2/Myo19/Exoc1/Exoc4/Myh10/Gpr143/Gpsm2/Scrib/Hmox1/Exoc8/Exoc2/Myo1e/Myh9/Chmp1a/Pdcd6/Spry2/Vps4a/Fbxw11/Sapcd2/Eif6/Cfl1/Syne1/H…	71
GO:1904375	BP	GO:1904375	regulation of protein localization to cell periphery	37/1480	156/28891	2.97753e-15	1.95773e-13	1.24408e-13	Epha3/Tmem59/Mmp14/Atp2c1/Adam10/Stx7/Neto2/Vps35/Ezr/Acsl3/Itgb1/Stx8/Plk1/Rab38/Kif5b/Ppp2r5a/Gsk3b/Epb41/Sptbn1/Rer1/Vti1b/Pgrmc1/Sqstm1/Map2k1/Myo5a/Tmed2/Arf6/Vamp4/Gpsm2/Actr3/Cib1/Rap1a/Dag1/Vps4a/Dab2/Sapcd2/Dlg1	37
GO:0032940	BP	GO:0032940	secretion by cell	110/1480	969/28891	3.73654e-15	2.42917e-13	1.54367e-13	Hgs/Vamp7/Steap3/Acvr2a/Pi4k2a/Gnptab/Sdcbp/Stxbp2/Stam/Stxbp3/Syt4/Syt11/Scamp1/Abcc4/Atp2a2/Tnfrsf1a/Napa/Preb/Gja1/Tmed10/Vps35/Kit/Rala/Ralb/Neo1/Eng/Lrp5/Slc38a2/Slc4a8/Lgals9/Tyro3/Adam9/Stxbp1/Srebf1/Pdcd6ip/Tsg101/Tm7sf3/Rab34/Rab10/Kif5b/Rab5a/Sacm1l/Slc12a2/M6pr/Ptpn23/Gna11/Ppia/Stx2/Tmem132a/Acvr2b/Slc30a1/Pnkd/Rab8b/Wls/Nisch/Vamp3/Gnaq/Slc16a1/Slc1a5/Ptpn11/Psen1/Arf1/Rac1/Raf1/Copg…	110
GO:0006906	BP	GO:0006906	vesicle fusion	33/1480	126/28891	4.21578e-15	2.71028e-13	1.72231e-13	Vamp7/Stx12/Chp1/Stx6/Syt4/Syt11/Ankfy1/Stx7/Stx8/Stxbp1/Rab34/Kif5b/Sec22b/Tom1/Stx2/Rab8b/Vamp3/Vti1a/Vti1b/Rab8a/Snap47/Chmp5/Tmem175/Vamp4/Stx16/Yipf5/Rab13/Stx11/Yipf4/Chmp1a/Vps4a/Gosr1/Uso1	33
GO:0090066	BP	GO:0090066	regulation of anatomical structure size	79/1480	587/28891	4.30023e-15	2.73419e-13	1.7375e-13	Bmpr2/Slc12a7/Ptprs/Atp7a/Daam2/Ptprm/Kirrel1/Atp2b1/Lrrc8a/Plxna4/Slc12a9/Gja1/Ezr/Ssh1/Epha7/Ano6/Slc12a4/Capza2/Sema4c/Capza1/Sema6a/Rhoa/Rab5a/Add1/Slc12a2/Cdc42ep1/Gsk3b/Capzb/Clns1a/Adcy6/Ryk/P2rx4/Dnm2/Faah/Cracd/Sptbn1/Rac1/Cyfip1/Wdtc1/Dnajc16/Nrp1/Inf2/Scpep1/Arfgef1/Dbnl/Sptan1/Grb2/Rtn4/Trpv2/Flii/Hax1/Dbn1/Myo1c/Arhgap42/Add3/Stk39/Map2k1/Efna5/Lima1/Rdx/Ilk/Arf6/Plekha7/Arpc2/Tmod3/…	79
GO:0090174	BP	GO:0090174	organelle membrane fusion	33/1480	128/28891	6.94669e-15	4.36886e-13	2.77629e-13	Vamp7/Stx12/Chp1/Stx6/Syt4/Syt11/Ankfy1/Stx7/Stx8/Stxbp1/Rab34/Kif5b/Sec22b/Tom1/Stx2/Rab8b/Vamp3/Vti1a/Vti1b/Rab8a/Snap47/Chmp5/Tmem175/Vamp4/Stx16/Yipf5/Rab13/Stx11/Yipf4/Chmp1a/Vps4a/Gosr1/Uso1	33
GO:1905475	BP	GO:1905475	regulation of protein localization to membrane	43/1480	212/28891	7.14916e-15	4.44785e-13	2.82649e-13	Epha3/Vamp7/Tmem59/Mmp14/Atp2c1/Adam10/Snx27/Stx7/Neto2/Ezr/Ssh1/Stom/Acsl3/Itgb1/Stx8/Kif5b/Ppp2r5a/Gsk3b/Erbb2/Sptbn1/Fis1/Fyn/Rer1/Vti1b/Pgrmc1/Gpc1/Lrp4/Dbn1/Myo1c/Sqstm1/Map2k1/Myo5a/Tmed2/Arf6/Arpc2/Vamp4/Actr3/Cib1/Rap1a/Dag1/Vps4a/Dab2/Dlg1	43
GO:1903047	BP	GO:1903047	mitotic cell cycle process	92/1480	751/28891	8.1819e-15	5.03622e-13	3.20038e-13	Hspa1b/Flna/Ddr2/Usp8/Abcb1b/Acvr1/Brox/Met/Zw10/Rhou/Cdk17/Rpa2/Dync1li1/Insr/Adam17/Ctdspl/Aaas/Itgb1/Igf1r/Plk1/Acvr1b/Pdcd6ip/Cul7/Klhl22/Tk1/Ctdsp2/Stambp/Rhoa/Pcna/Ctdsp1/Rab35/Adamts1/Cdk2/Ncapg/Ppp6c/Hspa2/Cdk18/Stx2/Ppp2r5c/Rhob/Cul3/Dync1h1/Ranbp1/Rhoc/Kif20b/Cep55/Dtl/Arf1/Sptbn1/Akap8/Larp7/Rdx/Vps4b/Rae1/Chmp5/Tfap4/Zwilch/Psme3/Snx33/Exoc1/Ccnb2/Smarcc2/Smc2/Smc4/Exoc4/Cdk1/Myh10/Tm…	92
GO:0009101	BP	GO:0009101	glycoprotein biosynthetic process	51/1480	289/28891	8.81772e-15	5.37045e-13	3.41277e-13	Atp7a/Tmem59/Chp1/Galnt1/Chsy3/Tm9sf2/Itm2c/Galnt2/Bace2/Alg2/Stt3a/Insr/Gfpt1/Ddost/Chpf/Itm2a/Galnt7/Dhdds/St3gal6/Vangl2/Glce/Mlec/Mgat5/Hs2st1/Rpn1/B4galt7/Ncstn/Nus1/Alg5/Soat1/Psen1/Itm2b/Arfgef1/Npc1/Galnt13/Tmtc3/Gxylt2/Fam20b/Slc35b2/Cog7/Dpm1/Rpn2/St6galnac4/St3gal4/Mgat4b/Cog3/Krtcap2/Ostc/Alg3/Pomk/Golph3	51
GO:0048812	BP	GO:0048812	neuron projection morphogenesis	90/1480	731/28891	1.20069e-14	7.23666e-13	4.5987e-13	Tubb2b/Ubb/Plxna1/Epha3/Unc5c/Plxnd1/Bmpr2/Nrp2/Nedd4l/Plxnb2/Ptprs/Ddr1/Ptprd/Atp7a/Vamp7/Ptprm/Ptprf/Kidins220/Syt4/Plxna2/Met/Plxnb1/Plxna4/Adam10/Gja1/Aplp2/Neo1/Epha7/Adam17/Itgb1/Igf1r/Stxbp1/Sema4c/Nedd4/Cul7/Unc5b/Rab10/Sema6a/Kif5b/Zdhhc15/Vangl2/Map2k2/Gsk3b/Ryk/Erbb2/Lgr4/Wls/Dnm2/Kif20b/Ptpn11/Psen1/Boc/Ablim1/Rac1/Cyfip1/Nrp1/Fyn/Dbnl/Sipa1l1/Plaa/Cux2/Rtn4/Trpv2/Rab8a/Stau2/Lrp4/Dbn…	90
GO:0007264	BP	GO:0007264	small GTPase mediated signal transduction	64/1480	428/28891	1.33999e-14	7.99298e-13	5.07932e-13	Notch2/Usp8/Sdcbp/Met/Rhou/Rala/Ralb/Gna13/Gna12/Itgb1/Adgrg1/Rras2/Stambp/Rhoa/Rab35/Vangl2/Rap2b/Rasal3/Cdc42ep1/Rhoj/Rhob/Cul3/Erbb2/Rhoc/Nisch/Dnm2/Bnip2/Prag1/Rhot2/Rhod/Rac1/Arhgap1/Cyfip1/Nrp1/Sipa1/Arfgef1/Dbnl/Sipa1l1/Grb2/Rtn4/Rap2c/Rhot1/Arhgap42/Rap2a/Map2k1/Dnaja3/Rdx/Rheb/Arf6/Sipa1l3/Gpsm2/Rap1a/Hmox1/Arhgdia/Flcn/Tsc2/Spry2/Hacd3/Rab21/Map4k4/Garre1/Uso1/Tns3/Cyth2	64
GO:0006119	BP	GO:0006119	oxidative phosphorylation	35/1480	147/28891	1.46842e-14	8.66966e-13	5.50933e-13	Atp7a/Ndufs1/Atp5pd/Ndufa10/Rhoa/Atp5f1b/Ndufa9/Ndufb10/Uqcrq/Atp5f1a/Atp5pb/Atp5po/Uqcrfs1/Ndufs3/Ndufv1/Mtch2/Cox4i1/Uqcc2/Ndufs7/Cdk1/Uqcrc2/Atp5f1d/Ndufa13/Atp5f1c/Ndufs8/Atp5mf/Sdhb/Stoml2/Ndufa12/Ndufa6/Nipsnap2/Atp5me/Shmt2/Ndufaf1/Uqcrh	35
GO:0048667	BP	GO:0048667	cell morphogenesis involved in neuron differentiation	85/1480	677/28891	2.20579e-14	1.28916e-12	8.19228e-13	Tubb2b/Plxna1/Epha3/Unc5c/Plxnd1/Bmpr2/Nrp2/Nedd4l/Plxnb2/Ptprs/Ptprd/Atp7a/Vamp7/Ptprm/Ptprf/Kidins220/Plxna2/Met/Plxnb1/Plxna4/Adam10/Aplp2/Neo1/Epha7/Adam17/Itgb1/Igf1r/Stxbp1/Sema4c/Nedd4/Cul7/Unc5b/Rab10/Sema6a/Kif5b/Zdhhc15/Tbcd/Vangl2/Map2k2/Gsk3b/Ryk/Erbb2/Lgr4/Wls/Dnm2/Ptpn11/Psen1/Boc/Triobp/Ablim1/Rac1/Cyfip1/Nrp1/Fyn/Dbnl/Sipa1l1/Cux2/Rtn4/Trpv2/Rab8a/Stau2/Lrp4/Dbn1/Rap2a/Map2k1/Efna…	85
GO:0015931	BP	GO:0015931	nucleobase-containing compound transport	41/1480	202/28891	2.94643e-14	1.70481e-12	1.08336e-12	Tgfbr2/Xpo1/Lrrc8a/Abcc4/Abcc1/Abcc5/Nup210/Gja1/Pom121/Aaas/Xpo5/Nup188/Xpot/Ndc1/Magoh/Slc25a32/Magohb/Nup93/Srsf3/Slc29a1/Slc25a24/Lrrc8c/Qki/Slc35a4/Ncbp3/Rae1/Slc29a3/Phax/Slc35b2/Slc25a51/Thoc2/Nup107/Thoc6/Nup43/Nup37/Hnrnpa3/Cetn2/Ythdc1/Ddx19a/Thoc3/Nup153	41
GO:0055082	BP	GO:0055082	intracellular chemical homeostasis	91/1480	755/28891	3.0354e-14	1.71031e-12	1.08686e-12	Flna/Slc12a7/Atp7a/Bcap31/Steap3/Slc4a2/Atp2c1/Chp1/Slc4a7/Atp1a1/Atp6v0d1/Atp2b1/Stxbp3/Ndfip1/Ccdc47/Atp13a3/Atp1a4/Atp2a2/Cnnm4/Tfrc/Aplp2/Neo1/Lrp5/Atp6v0a2/Asph/Hvcn1/Slc4a8/Tm9sf4/Igf1r/Slc45a2/Atp6v1a/Cherp/Tra2b/Rab38/Atp6v1b2/Atp1b3/Abcb6/Rab34/Immt/Kif5b/Lrrc8d/Atp6ap2/Slc12a2/Atp5f1b/Naglu/Bax/Atp6v0a1/Slc30a1/Abcb7/Psen1/Slc24a5/Arf1/Rac1/Fis1/Wdtc1/Raf1/Tmc8/Thada/Psen2/Rtn4/Tmem9/Va…	91
GO:0006914	BP	GO:0006914	autophagy	70/1480	503/28891	3.04463e-14	1.71031e-12	1.08686e-12	Stub1/Tmem59/Stx12/Syt11/Aup1/Gaa/Scfd1/Sptlc1/Atp2a2/Rab1b/Ralb/Retreg3/Irgm1/Fkbp8/Srebf1/Pdcd6ip/Tollip/Klhl22/Sec22b/Gsk3b/Naglu/Bag3/Tom1/Vdac1/Stk38l/Trim32/Atp6v0a1/Psen1/Sptlc2/Lgals8/Vti1a/Fis1/Dnajc16/Vti1b/Nbr1/Plaa/Rab8a/Npc1/Sqstm1/Rragc/Map2k1/Hspa8/Myo5a/Vps4b/Chmp5/Prkaa1/Tcirg1/Trim27/Cdc37/Trim21/Cisd1/Lamp2/Hk2/Rraga/Slc7a5/Hmox1/Soga3/Ormdl3/Usp30/Cisd2/Pik3c3/Flcn/Fbxl2/Tmbim…	70
GO:0061919	BP	GO:0061919	process utilizing autophagic mechanism	70/1480	503/28891	3.04463e-14	1.71031e-12	1.08686e-12	Stub1/Tmem59/Stx12/Syt11/Aup1/Gaa/Scfd1/Sptlc1/Atp2a2/Rab1b/Ralb/Retreg3/Irgm1/Fkbp8/Srebf1/Pdcd6ip/Tollip/Klhl22/Sec22b/Gsk3b/Naglu/Bag3/Tom1/Vdac1/Stk38l/Trim32/Atp6v0a1/Psen1/Sptlc2/Lgals8/Vti1a/Fis1/Dnajc16/Vti1b/Nbr1/Plaa/Rab8a/Npc1/Sqstm1/Rragc/Map2k1/Hspa8/Myo5a/Vps4b/Chmp5/Prkaa1/Tcirg1/Trim27/Cdc37/Trim21/Cisd1/Lamp2/Hk2/Rraga/Slc7a5/Hmox1/Soga3/Ormdl3/Usp30/Cisd2/Pik3c3/Flcn/Fbxl2/Tmbim…	70
GO:0008610	BP	GO:0008610	lipid biosynthetic process	86/1480	695/28891	3.56171e-14	1.98154e-12	1.25921e-12	Pi4k2b/Abca3/Pi4k2a/Chp1/Atp1a1/Tm9sf2/Pgs1/Smpd4/Cers2/Sptlc1/Pisd/Stard3/Ubr4/Far1/Ldlr/Tamm41/Vac14/Ugcg/Agk/Acsl3/Igf1r/Pigs/Rab38/Srebf1/Erlin2/Dhdds/Gpat4/St3gal6/Acsl5/Lpcat2/Fads2/Nus1/Acsbg1/Pigt/Fabp5/Pign/Sptlc2/Gnpat/Apob/Pi4ka/Wdtc1/Pigk/Daglb/Qki/Cers5/Pigg/Smpd2/Gpaa1/Ptges2/Serinc1/Cds2/Gk/Myo5a/Cbr4/Prkaa1/Dgke/Hsd17b12/Lpcat1/Sccpdh/Ebp/Bpnt1/Dpm1/Cdipt/Hsd17b11/Impa2/St6galnac4…	86
GO:0001667	BP	GO:0001667	ameboidal-type cell migration	67/1480	471/28891	3.77249e-14	2.07882e-12	1.32104e-12	Plxnd1/Bmpr2/Nrp2/Ddr2/Daam2/Tgfbr2/Ptprm/Acvrl1/Ephb4/Acvr1/Met/Tgfbr1/Spred1/Kit/Smurf2/Lrp5/Gna13/Adam17/Gna12/Adam9/Itgb1/Acvr1b/Sema4c/Sema6a/Rhoa/Atp5f1b/Ptpn23/Nus1/Rhoj/Atp5f1a/Rhob/P2rx4/Ptpn11/Adipor1/Lgals8/Rac1/Nrp1/Sox10/Rras/Rtn4/Rffl/Ilk/Arf6/Bsg/Nr2f2/Actr3/Cap1/Acta2/Cenpv/Cib1/Rab13/Ric8a/Hmox1/Sparc/Plec/Myh9/Pfn1/Gipc1/Pip5k1a/Amotl1/Tsc2/Bag4/Pdcd6/Map4k4/Pax3/Cfl1/Tns3	67
GO:0008654	BP	GO:0008654	phospholipid biosynthetic process	43/1480	223/28891	4.6311e-14	2.52788e-12	1.6064e-12	Pi4k2b/Pi4k2a/Chp1/Pgs1/Sptlc1/Pisd/Far1/Tamm41/Vac14/Acsl3/Pigs/Rab38/Dhdds/Gpat4/Acsl5/Lpcat2/Nus1/Pigt/Fabp5/Pign/Sptlc2/Gnpat/Pi4ka/Pigk/Pigg/Gpaa1/Serinc1/Cds2/Dgke/Lpcat1/Bpnt1/Dpm1/Cdipt/Impa2/Selenoi/Ormdl3/Pip5k1a/Pik3c3/Agpat3/Idh1/Pigu/Cept1/Mboat2	43
GO:0022411	BP	GO:0022411	cellular component disassembly	66/1480	462/28891	4.77757e-14	2.58346e-12	1.64172e-12	Ddr2/Ssrp1/Ddr1/Tgfbr1/Atp2a2/Napa/Eng/Asph/Insr/Sh3pxd2b/Retreg3/Itgb1/Igf1r/Gbf1/Setx/Capza2/Plk1/Irgm1/Fkbp8/Srebf1/Capza1/Kif5b/Rhoa/Add1/Gsk3b/Capzb/Aifm1/Bax/Tom1/Vdac1/Hspa2/Cracd/Sptbn1/Fis1/Sptan1/Flii/Sqstm1/Add3/Lima1/Hspa8/Rdx/Vps4b/Chmp5/Arf6/Prkaa1/Arpc2/Smarcc2/Cdk1/Cdc37/Tmod3/Lamp2/Hk2/Cib1/Exoc8/Usp30/Cisd2/Pik3c3/Chmp1a/Eif5a/Vps4a/Smarcb1/Nes/Map4k4/Cfl1/Gak/Ambra1	66
GO:0030335	BP	GO:0030335	positive regulation of cell migration	78/1480	602/28891	5.03048e-14	2.69503e-12	1.71262e-12	Flna/Bmpr2/Ddr2/Atp7a/Daam2/Il6st/Tgfbr2/Mmp14/Sdcbp/Acvr1/Met/Tgfbr1/Adam10/Abcc1/Kit/Ssh1/Smurf2/Lgals9/Insr/Adam17/Ano6/Pdgfra/Adam9/Itgb1/Igf1r/Acvr1b/Sema4c/Rras2/Sema6a/Rhoa/Adamts1/Atp5f1b/Tjp1/Mgat5/Nus1/Rhoj/Atp5f1a/Mcam/Rhob/Trim32/P2rx4/Rhoc/Dapk3/Kif20b/Ptp4a1/Rhod/Rac1/Nrp1/Rras/Plaa/Rtn4/Ackr3/Myo1c/Stk39/Map2k1/Rdx/Myo5a/Ilk/Arf6/Arpc2/Bsg/Actr3/Acta2/Cib1/Itga6/Hmox1/Mapk1/Sparc/C…	78
GO:0006892	BP	GO:0006892	post-Golgi vesicle-mediated transport	28/1480	99/28891	6.0635e-14	3.21866e-12	2.04537e-12	Vamp7/Atp2c1/Scfd1/Ankfy1/Acsl3/Gbf1/Sort1/Rab34/Rab10/Dnm2/Vamp3/Vps29/Vti1a/Sptbn1/Vti1b/Gga2/Golga7/Rab31/Myo5a/Exoc1/Vamp4/Exoc4/Rp2/Exoc8/Exoc2/Gak/Vamp5/Golph3	28
GO:2000147	BP	GO:2000147	positive regulation of cell motility	80/1480	630/28891	7.09693e-14	3.73298e-12	2.37221e-12	Flna/Bmpr2/Ddr2/Atp7a/Daam2/Il6st/Tgfbr2/Mmp14/Sdcbp/Acvr1/Met/Tgfbr1/Adam10/Abcc1/Kit/Ssh1/Smurf2/Lgals9/Insr/Adam17/Ano6/Pdgfra/Adam9/Itgb1/Igf1r/Acvr1b/Sema4c/Rras2/Sema6a/Rhoa/Adamts1/Atp5f1b/Tjp1/Map2k2/Mgat5/Nus1/Rhoj/Atp5f1a/Mcam/Rhob/Trim32/P2rx4/Rhoc/Dapk3/Kif20b/Ptp4a1/Rhod/Rac1/Nrp1/Rras/Plaa/Rtn4/Ackr3/Myo1c/Stk39/Map2k1/Rdx/Myo5a/Ilk/Arf6/Arpc2/Bsg/Actr3/Acta2/Cib1/Itga6/Hmox1/Mapk1/…	80
GO:0010638	BP	GO:0010638	positive regulation of organelle organization	72/1480	536/28891	7.92004e-14	4.12841e-12	2.62349e-12	Flna/Kirrel1/Sdcbp/Met/Tgfbr1/Pgam5/Gja1/Vps35/Rala/Ralb/Insr/Cct8/Cct7/Sh3pxd2b/Igf1r/Irgm1/Pdcd6ip/Tmed9/Kif5b/Rhoa/Surf4/Cdk2/Ncapg/Cdc42ep1/Gsk3b/Sorbs3/Bax/Tom1/Vdac1/Cul3/Dync1h1/Rhoc/Slain2/Cracd/Stx18/Rac1/Cyfip1/Fis1/Nrp1/Cct4/Grb2/Myo1c/Add3/Hmbox1/Cct3/Vps4b/Arf6/Arpc2/Trim27/Tapt1/Smc2/Smc4/Cdk1/Map2k7/Cct6a/Gpsm2/Actr3/Ncapd2/Drg1/Mapk1/Ssbp1/Pfn1/Pphln1/Pnkp/Adck1/Ruvbl2/Bag4/Nes/Cf…	72
GO:0016567	BP	GO:0016567	protein ubiquitination	82/1480	656/28891	8.18245e-14	4.22711e-12	2.68621e-12	Ubc/Ubb/Itch/Nedd4l/Stub1/Wwp1/Marchf7/Mgrn1/Chp1/Wwp2/Arrdc3/Ndfip1/Tgfbr1/Rnf19a/Mib1/Cand1/Hspbp1/Kcmf1/Ubr2/Smurf2/Bag5/Cand2/Znrf3/Ankib1/Ube3c/Plk1/Rnf144a/Rnf19b/Nedd4/Tsg101/Cul7/Amfr/Klhl22/Ivns1abp/Wbp1l/Rnf13/Rnf11/Klhl13/Gsk3b/Ppia/Vps28/Cul3/Bag2/Trim32/Ltn1/Dtl/Psen1/Cul2/Fyn/Dtx2/Psen2/Plaa/Rffl/Sqstm1/Dnaja3/Pin1/Marchf9/Trim27/Fbxl17/Usp4/Cul1/Dnaja1/Wdr77/Smad7/Trim21/Cul4a/Rps2…	82
GO:0055086	BP	GO:0055086	nucleobase-containing small molecule metabolic process	74/1480	560/28891	8.29249e-14	4.24605e-12	2.69825e-12	Atp7a/Gpd2/Slc4a7/Prpsap2/Far1/Ndufs1/Prps2/Adcy3/Adcy7/Atp5pd/Prps1l3/Prps1/Acsl3/Prpsap1/Gfpt1/Umps/Atp6v1a/Atp6v1b2/Ndufa10/Dcakd/Tk1/Gpat4/Rhoa/Acsl5/Atp5f1b/Ndufa9/Vdac1/Adcy6/Ndufb10/Atp5f1a/Atp5pb/Atp5po/Uxs1/Ctps1/Ndufs3/Ndufv1/Suclg2/Fis1/Tyms/Ndufs7/Map2k1/Hspa8/Idh3a/Pdhb/Uap1l1/Dpm1/Rrm2/Atp5f1d/Mccc2/Idh3g/Ndufa13/Atp5f1c/Ndufs8/Atp5mf/Nudt5/Mapk1/Pgd/Sdhb/Pcmt1/Stoml2/Adsl/Mdh1/Nduf…	74
GO:0032970	BP	GO:0032970	regulation of actin filament-based process	60/1480	402/28891	9.80618e-14	4.95306e-12	3.14753e-12	Epha3/Flna/Daam2/Slc4a2/Kirrel1/Atp1a1/Met/Tgfbr1/Atp2a2/Gja1/Rala/Ssh1/Sh3pxd2b/Capza2/Capza1/Rhoa/Vangl2/Add1/Tjp1/Cdc42ep1/Sorbs3/Capzb/Phldb2/Rhoc/Dapk3/Rhod/Arf1/Cracd/Sptbn1/Rac1/Cyfip1/Nrp1/Coro2b/Arfgef1/Dbnl/Sptan1/Grb2/Flii/Rnh1/Stau2/Hax1/Dbn1/Myo1c/Add3/Efna5/Lima1/Rdx/Ilk/Arf6/Arpc2/Trim27/Tmod3/Actr3/Acta2/Myh9/Pfn1/Bag4/Cfl1/Dlg1/Pard3	60
GO:0040017	BP	GO:0040017	positive regulation of locomotion	81/1480	646/28891	9.84449e-14	4.95306e-12	3.14753e-12	Flna/Bmpr2/Ddr2/Atp7a/Daam2/Il6st/Tgfbr2/Mmp14/Sdcbp/Acvr1/Met/Tgfbr1/Adam10/Abcc1/Vps35/Kit/Ssh1/Smurf2/Lgals9/Insr/Adam17/Ano6/Pdgfra/Adam9/Itgb1/Igf1r/Acvr1b/Sema4c/Rras2/Sema6a/Rhoa/Adamts1/Atp5f1b/Tjp1/Map2k2/Mgat5/Nus1/Rhoj/Atp5f1a/Mcam/Rhob/Trim32/P2rx4/Rhoc/Dapk3/Kif20b/Ptp4a1/Rhod/Rac1/Nrp1/Rras/Plaa/Rtn4/Ackr3/Myo1c/Stk39/Map2k1/Rdx/Myo5a/Ilk/Arf6/Arpc2/Bsg/Actr3/Acta2/Cib1/Itga6/Hmox1/…	81
GO:0022406	BP	GO:0022406	membrane docking	26/1480	87/28891	1.13002e-13	5.62261e-12	3.57301e-12	Stx12/Chp1/Stx6/Stxbp2/Stxbp3/Atp2a2/Stx7/Ralb/Snx3/Stx8/Stxbp1/Esyt2/Stx2/Rab8b/Psen2/Rab8a/Vapb/Exoc1/Stx16/Exoc4/Ahcyl1/Rab13/Exoc8/Exoc2/Stx11/Uso1	26
GO:0006644	BP	GO:0006644	phospholipid metabolic process	56/1480	360/28891	1.13696e-13	5.62261e-12	3.57301e-12	Pi4k2b/Abca3/Pi4k2a/Chp1/Pip4p2/Pgs1/Smpd4/Sptlc1/Pisd/Far1/Ldlr/Tamm41/Vac14/Acsl3/Pigs/Rab38/Abhd12/Dhdds/Gpat4/Acsl5/Sacm1l/Lpcat2/Napepld/Nus1/Pigt/Fabp5/Pign/Sptlc2/Gnpat/Arf1/Pi4ka/Pigk/Abhd16a/Pigg/Smpd2/Gpaa1/Serinc1/Cds2/Dgke/Pip4p1/Gdpd1/Lpcat1/Bpnt1/Dpm1/Cdipt/Impa2/Selenoi/Ormdl3/Pip5k1a/Fig4/Pik3c3/Agpat3/Idh1/Pigu/Cept1/Mboat2	56
GO:0035239	BP	GO:0035239	tube morphogenesis	106/1480	968/28891	1.26907e-13	6.22275e-12	3.95438e-12	Flna/Plxnd1/Bmpr2/Notch2/Nrp2/Plxnb2/Hgs/Ddr1/Tgfbr2/Mmp14/Ptprm/Acvrl1/Ephb4/Acvr1/Apold1/Met/Bmpr1a/Tgfbr1/Spred1/Mib1/Tnfrsf1a/Gja1/Rala/Ldlr/Eng/Lrp5/Gna13/Epha7/Pdgfra/Itgb1/Adgrg1/Sema4c/Nedd4/Cul7/Unc5b/Cd44/Sema6a/Rhoa/Prkacb/Adamts1/Vangl2/Add1/Slc12a2/Atp5f1b/Tjp1/Naglu/Bax/Hs2st1/Mthfd1l/Nus1/Rhoj/Stx2/Acvr2b/Mcam/Rhob/Luzp1/Lgr4/Kif20b/Cald1/Psen1/Apob/Nrp1/Sox10/Rras/Rtn4/Ackr3/Qki/R…	106
GO:0032956	BP	GO:0032956	regulation of actin cytoskeleton organization	55/1480	351/28891	1.38581e-13	6.73808e-12	4.28186e-12	Epha3/Flna/Daam2/Slc4a2/Kirrel1/Met/Tgfbr1/Gja1/Rala/Ssh1/Sh3pxd2b/Capza2/Capza1/Rhoa/Vangl2/Add1/Tjp1/Cdc42ep1/Sorbs3/Capzb/Phldb2/Rhoc/Dapk3/Rhod/Arf1/Cracd/Sptbn1/Rac1/Cyfip1/Nrp1/Coro2b/Arfgef1/Dbnl/Sptan1/Grb2/Flii/Rnh1/Stau2/Hax1/Dbn1/Myo1c/Add3/Efna5/Lima1/Rdx/Ilk/Arf6/Arpc2/Trim27/Tmod3/Actr3/Pfn1/Bag4/Cfl1/Dlg1	55
GO:0051650	BP	GO:0051650	establishment of vesicle localization	39/1480	193/28891	1.44704e-13	6.97714e-12	4.43378e-12	Hgs/Vamp7/Steap3/Sdcbp/Chp1/Stam/Syt4/Syt11/Stard3/Preb/Tmed10/Mreg/Gbf1/Pdcd6ip/Tsg101/Tmed9/Kif5b/Naglu/Cul3/Psen1/Arf1/Myo6/Myo1c/Map2k1/Myo5a/Vps4b/Tcirg1/Myo19/Exoc1/Exoc4/Gpr143/Scrib/Exoc8/Exoc2/Myo1e/Pdcd6/Vps4a/Fbxw11/Trappc5	39
GO:0000281	BP	GO:0000281	mitotic cytokinesis	25/1480	81/28891	1.47071e-13	7.03267e-12	4.46907e-12	Usp8/Plk1/Pdcd6ip/Cul7/Stambp/Rhoa/Rab35/Stx2/Rhob/Rhoc/Kif20b/Cep55/Arf1/Sptbn1/Vps4b/Chmp5/Snx33/Exoc1/Exoc4/Myh10/Exoc8/Exoc2/Chmp1a/Vps4a/Cfl1	25
GO:0007033	BP	GO:0007033	vacuole organization	42/1480	221/28891	1.5272e-13	7.24294e-12	4.60268e-12	Stx12/Gnptab/Gaa/Scfd1/Atp2a2/Rab1b/Vps35/Ralb/Slc45a2/Irgm1/Rab34/Lamtor1/Atp6ap2/Man2a1/Sec22b/Naglu/Bag3/Tom1/Laptm4b/Psen1/Arf1/Dnajc16/Tmem9/Clvs1/Vps4b/Ccdc115/Chmp5/Tmem175/Tcirg1/Atp6v0c/Tmem106b/Tfe3/Fig4/Pik3c3/Flcn/Chmp1a/Tpp1/Vps4a/Cln6/Atf2/Hook3/Ambra1	42
GO:0042147	BP	GO:0042147	retrograde transport, endosome to Golgi	26/1480	89/28891	2.05192e-13	9.65237e-12	6.13382e-12	Stx6/Ankfy1/Vps35/Snx3/Gbf1/Rhobtb3/Dennd2a/Snx12/Snx8/Rab6a/Snx5/Vamp3/Snx1/Golt1b/Vps29/Vti1a/Vps26a/Vti1b/Vps26b/Snx6/Trim27/Stx16/Arl1/Usp7/Snx2/Gosr1	26
GO:0007032	BP	GO:0007032	endosome organization	23/1480	69/28891	2.18205e-13	1.01817e-11	6.47019e-12	Usp8/Pi4k2b/Stx12/Pi4k2a/Stx6/Snx3/Rab5c/Lamtor1/Tom1/Laptm4b/Vti1a/Tmem9/Rab5b/Sqstm1/Vps4b/Chmp5/Snx33/Vamp4/Exoc8/Pik3c3/Chmp1a/Vps4a/Hook3	23
GO:0015986	BP	GO:0015986	proton motive force-driven ATP synthesis	23/1480	70/28891	3.09313e-13	1.43175e-11	9.09835e-12	Ndufs1/Atp5pd/Ndufa10/Atp5f1b/Ndufa9/Ndufb10/Atp5f1a/Atp5pb/Atp5po/Ndufs3/Ndufv1/Ndufs7/Atp5f1d/Ndufa13/Atp5f1c/Ndufs8/Atp5mf/Sdhb/Stoml2/Ndufa12/Ndufa6/Atp5me/Atp5mc1	23
GO:0043254	BP	GO:0043254	regulation of protein-containing complex assembly	62/1480	437/28891	3.8358e-13	1.76142e-11	1.11934e-11	Daam2/Stub1/Kirrel1/Abca3/Syt11/Met/Napa/Cand1/Preb/Tfrc/Vps35/Ralb/Ssh1/Vdac2/Ncln/Stxbp1/Capza2/Irgm1/Capza1/Rhoa/Tbcd/Add1/Cdc42ep1/Gsk3b/Capzb/Bax/Mavs/Rhoc/Slain2/Ptpn11/Cracd/Sptbn1/Rac1/Cyfip1/Raf1/Tmc8/Arfgef1/Dbnl/Sptan1/Grb2/Flii/Hax1/Dbn1/Myo1c/Add3/Hspa8/Rdx/Arf6/Arpc2/Tmod3/Lamp2/Actr3/Gnl3l/Drg1/Pfn1/Fbxl2/Ppp2ca/Bag4/Cfl1/Hjurp/Dlg1/Ambra1	62
GO:0070647	BP	GO:0070647	protein modification by small protein conjugation or removal	94/1480	828/28891	4.07571e-13	1.85686e-11	1.17998e-11	Ubc/Ubb/Itch/Nedd4l/Stub1/Usp8/Wwp1/Marchf7/Mgrn1/Chp1/Wwp2/Arrdc3/Ndfip1/Tgfbr1/Rnf19a/Mib1/Usp15/Cand1/Hspbp1/Kcmf1/Ubr2/Smurf2/Bag5/Cand2/Znrf3/Ankib1/Ube3c/Plk1/Rnf144a/Rnf19b/Nedd4/Tsg101/Cul7/Tollip/Amfr/Klhl22/Ivns1abp/Stambp/Wbp1l/Rnf13/Rnf11/Klhl13/Gsk3b/Ppia/Vps28/Cul3/Bag2/Trim32/Ltn1/Dtl/Psen1/Cul2/Josd1/Fyn/Dtx2/Psen2/Plaa/Rffl/Sqstm1/Usp5/Dnaja3/Pin1/Marchf9/Trim27/Fbxl17/Usp4/Cul1/…	94
GO:0006873	BP	GO:0006873	intracellular monoatomic ion homeostasis	72/1480	554/28891	4.12607e-13	1.86511e-11	1.18523e-11	Flna/Atp7a/Bcap31/Steap3/Slc4a2/Atp2c1/Chp1/Slc4a7/Atp1a1/Atp6v0d1/Atp2b1/Ndfip1/Ccdc47/Atp13a3/Atp1a4/Atp2a2/Cnnm4/Tfrc/Aplp2/Neo1/Atp6v0a2/Asph/Hvcn1/Slc4a8/Tm9sf4/Slc45a2/Atp6v1a/Cherp/Rab38/Atp6v1b2/Atp1b3/Abcb6/Immt/Atp6ap2/Slc12a2/Atp5f1b/Naglu/Bax/Atp6v0a1/Slc30a1/Abcb7/Psen1/Slc24a5/Arf1/Fis1/Tmc8/Thada/Psen2/Tmem9/Vapb/Fkbp1a/Stk39/Myo5a/Ccdc115/Tmem175/Tcirg1/Atp6v0c/Slc39a7/Clstn1/Tmem…	72
GO:0046390	BP	GO:0046390	ribose phosphate biosynthetic process	41/1480	218/28891	4.2541e-13	1.90808e-11	1.21253e-11	Prpsap2/Ndufs1/Prps2/Adcy3/Adcy7/Atp5pd/Prps1l3/Prps1/Prpsap1/Umps/Ndufa10/Dcakd/Acsl5/Atp5f1b/Ndufa9/Vdac1/Adcy6/Ndufb10/Atp5f1a/Atp5pb/Atp5po/Ctps1/Ndufs3/Ndufv1/Ndufs7/Map2k1/Pdhb/Atp5f1d/Ndufa13/Atp5f1c/Ndufs8/Atp5mf/Sdhb/Stoml2/Adsl/Ndufa12/Flcn/Ndufa6/Atp5me/G6pdx/Atp5mc1	41
GO:0009165	BP	GO:0009165	nucleotide biosynthetic process	46/1480	267/28891	4.42109e-13	1.96773e-11	1.25044e-11	Slc4a7/Prpsap2/Ndufs1/Prps2/Adcy3/Adcy7/Atp5pd/Prps1l3/Prps1/Prpsap1/Umps/Ndufa10/Dcakd/Tk1/Acsl5/Atp5f1b/Ndufa9/Vdac1/Adcy6/Ndufb10/Atp5f1a/Atp5pb/Atp5po/Ctps1/Ndufs3/Ndufv1/Tyms/Ndufs7/Map2k1/Pdhb/Rrm2/Atp5f1d/Ndufa13/Atp5f1c/Ndufs8/Atp5mf/Mapk1/Sdhb/Stoml2/Adsl/Ndufa12/Flcn/Ndufa6/Atp5me/G6pdx/Atp5mc1	46
GO:0030003	BP	GO:0030003	intracellular monoatomic cation homeostasis	71/1480	543/28891	4.47371e-13	1.97595e-11	1.25566e-11	Flna/Atp7a/Bcap31/Steap3/Slc4a2/Atp2c1/Chp1/Slc4a7/Atp1a1/Atp6v0d1/Atp2b1/Ndfip1/Ccdc47/Atp13a3/Atp1a4/Atp2a2/Cnnm4/Tfrc/Aplp2/Neo1/Atp6v0a2/Asph/Hvcn1/Slc4a8/Tm9sf4/Slc45a2/Atp6v1a/Cherp/Rab38/Atp6v1b2/Atp1b3/Abcb6/Immt/Atp6ap2/Slc12a2/Atp5f1b/Naglu/Bax/Atp6v0a1/Slc30a1/Abcb7/Psen1/Slc24a5/Arf1/Fis1/Tmc8/Thada/Psen2/Tmem9/Vapb/Fkbp1a/Myo5a/Ccdc115/Tmem175/Tcirg1/Atp6v0c/Slc39a7/Clstn1/Tmem106b/S…	71
GO:0009117	BP	GO:0009117	nucleotide metabolic process	67/1480	497/28891	4.94629e-13	2.16812e-11	1.37778e-11	Atp7a/Gpd2/Slc4a7/Prpsap2/Far1/Ndufs1/Prps2/Adcy3/Adcy7/Atp5pd/Prps1l3/Prps1/Acsl3/Prpsap1/Umps/Atp6v1a/Atp6v1b2/Ndufa10/Dcakd/Tk1/Gpat4/Rhoa/Acsl5/Atp5f1b/Ndufa9/Vdac1/Adcy6/Ndufb10/Atp5f1a/Atp5pb/Atp5po/Ctps1/Ndufs3/Ndufv1/Suclg2/Fis1/Tyms/Ndufs7/Map2k1/Hspa8/Idh3a/Pdhb/Rrm2/Atp5f1d/Mccc2/Idh3g/Ndufa13/Atp5f1c/Ndufs8/Atp5mf/Nudt5/Mapk1/Pgd/Sdhb/Stoml2/Adsl/Mdh1/Ndufa12/Flcn/Ndufa6/Idh1/Atp5me/E…	67
GO:0043161	BP	GO:0043161	proteasome-mediated ubiquitin-dependent protein catabolic process	63/1480	451/28891	5.01803e-13	2.18303e-11	1.38726e-11	Hspa1b/Itch/Nedd4l/Stub1/Wwp1/Bcap31/Xpo1/Ecpas/Wwp2/Aup1/Ccdc47/Canx/Rnf19a/Csnk1e/Hspbp1/Ubr2/Smurf2/Bag5/Ankib1/Gna12/Gid8/Plk1/Rnf144a/Rnf19b/Amfr/Klhl22/Erlin2/Rhobtb3/Gsk3b/Naglu/Ppp2r5c/Cul3/Man1a2/Ltn1/Dtl/Psen1/Cul2/Psen2/Plaa/Rffl/Eif3h/Usp5/Faf2/Fbxl17/Sec61b/Cul1/Psma5/Man1b1/Eif2ak3/Cul4a/Usp7/Nhlrc3/Psmb5/Erlin1/Araf/Gipc1/Fbxl2/Fbxo6/Usp19/Skp1/Dab2/Fbxw11/Ambra1	63
GO:0042776	BP	GO:0042776	proton motive force-driven mitochondrial ATP synthesis	22/1480	65/28891	5.07533e-13	2.19148e-11	1.39263e-11	Ndufs1/Atp5pd/Ndufa10/Atp5f1b/Ndufa9/Ndufb10/Atp5f1a/Atp5pb/Atp5po/Ndufs3/Ndufv1/Ndufs7/Atp5f1d/Ndufa13/Atp5f1c/Ndufs8/Atp5mf/Sdhb/Stoml2/Ndufa12/Ndufa6/Atp5me	22
GO:0019693	BP	GO:0019693	ribose phosphate metabolic process	56/1480	373/28891	5.11362e-13	2.19166e-11	1.39274e-11	Atp7a/Prpsap2/Far1/Ndufs1/Prps2/Adcy3/Adcy7/Atp5pd/Prps1l3/Prps1/Acsl3/Prpsap1/Umps/Atp6v1a/Atp6v1b2/Ndufa10/Dcakd/Gpat4/Rhoa/Acsl5/Atp5f1b/Ndufa9/Vdac1/Adcy6/Ndufb10/Atp5f1a/Atp5pb/Atp5po/Ctps1/Ndufs3/Ndufv1/Suclg2/Fis1/Ndufs7/Map2k1/Hspa8/Pdhb/Atp5f1d/Mccc2/Ndufa13/Atp5f1c/Ndufs8/Atp5mf/Nudt5/Sdhb/Stoml2/Adsl/Ndufa12/Flcn/Ndufa6/Atp5me/Entpd7/G6pdx/Gtpbp1/Atp5mc1/Acadsb	56
GO:0007163	BP	GO:0007163	establishment or maintenance of cell polarity	43/1480	239/28891	5.59008e-13	2.37825e-11	1.51131e-11	Fat1/Zw10/Gja1/Rhou/Ezr/Itgb1/Igf1r/Gbf1/Plk1/Pdcd6ip/Arf4/Rab10/Rhoa/Vangl2/Gsk3b/Flot2/Phldb2/Rhoj/Plekhg3/Kif20b/Rac1/Sipa1/Arfgef1/Myo18a/Ilk/Arf6/Tcirg1/Exoc4/Sipa1l3/Gpsm2/Actr3/Scrib/Myh9/Amotl1/Tsc2/Spry2/Fbxw11/Sapcd2/Frmd4a/Cfl1/Golph3/Dlg1/Pard3	43
GO:1901293	BP	GO:1901293	nucleoside phosphate biosynthetic process	46/1480	269/28891	5.82637e-13	2.45611e-11	1.56079e-11	Slc4a7/Prpsap2/Ndufs1/Prps2/Adcy3/Adcy7/Atp5pd/Prps1l3/Prps1/Prpsap1/Umps/Ndufa10/Dcakd/Tk1/Acsl5/Atp5f1b/Ndufa9/Vdac1/Adcy6/Ndufb10/Atp5f1a/Atp5pb/Atp5po/Ctps1/Ndufs3/Ndufv1/Tyms/Ndufs7/Map2k1/Pdhb/Rrm2/Atp5f1d/Ndufa13/Atp5f1c/Ndufs8/Atp5mf/Mapk1/Sdhb/Stoml2/Adsl/Ndufa12/Flcn/Ndufa6/Atp5me/G6pdx/Atp5mc1	46
GO:0032388	BP	GO:0032388	positive regulation of intracellular transport	38/1480	192/28891	5.85799e-13	2.45611e-11	1.56079e-11	Flna/Bcap31/Ipo5/Tmem30a/Tnfrsf1a/Ezr/Stom/Asph/Tm9sf4/Nedd4/Ehd1/Kif5b/Gsk3b/Bag3/Ptpn23/Dync1h1/Mavs/Erbb2/Kif20b/Psen1/Arf1/Stx18/Fis1/Fyn/Xpo4/Myo1c/Rdx/Prkaa1/Arpc2/Cdk1/Emd/Actr3/Cib1/Mapk1/Cep131/Ubr5/Dab2/Rab21	38
GO:0050821	BP	GO:0050821	protein stabilization	39/1480	202/28891	6.65485e-13	2.77014e-11	1.76035e-11	Flna/Stub1/Marchf7/Stx12/Chp1/Morc3/Bag5/Ncln/Cct8/Cct7/Stxbp1/Irgm1/Atp1b3/Ipo9/Bag3/Wiz/Flot2/Bag2/Gnaq/Cct4/Rtn4/Golga7/Dnaja3/Cct3/Pin1/Bag1/Cdc37/Cog7/Smad7/Glmp/Cct6a/Lamp2/Usp7/Pfn1/Telo2/Usp19/Bag4/Cog3/Rab21	39
GO:0009199	BP	GO:0009199	ribonucleoside triphosphate metabolic process	35/1480	167/28891	8.33246e-13	3.44369e-11	2.18837e-11	Atp7a/Ndufs1/Atp5pd/Atp6v1a/Atp6v1b2/Ndufa10/Rhoa/Atp5f1b/Ndufa9/Ndufb10/Atp5f1a/Atp5pb/Atp5po/Ctps1/Ndufs3/Ndufv1/Fis1/Ndufs7/Map2k1/Hspa8/Atp5f1d/Ndufa13/Atp5f1c/Ndufs8/Atp5mf/Nudt5/Sdhb/Stoml2/Ndufa12/Flcn/Ndufa6/Atp5me/Entpd7/Gtpbp1/Atp5mc1	35
GO:0043473	BP	GO:0043473	pigmentation	29/1480	117/28891	8.79285e-13	3.60107e-11	2.28838e-11	Atp7a/Tyrp1/Dct/Atrn/Kit/Bace2/Pmel/Mreg/Vangl1/Slc45a2/Rab38/Abcb6/Atp6ap2/Bax/Gna11/Tyr/Gnaq/Slc24a5/Rab32/Sox10/Arcn1/Mitf/Map2k1/Ap1m1/Myo5a/Gpr143/Sparc/Fig4/Pax3	29
GO:0099173	BP	GO:0099173	postsynapse organization	44/1480	252/28891	8.83773e-13	3.60107e-11	2.28838e-11	Nrp2/Ptprs/Ptprd/Ptprf/Adam10/Snx27/Il1rap/Vps35/Ezr/Ssh1/Epha7/Insr/Itgb1/Igf1r/Arf4/Zdhhc15/Abhd17b/Stk38l/Rapsn/Psen1/Arf1/Rac1/Nrp1/Fyn/Abhd17c/Rer1/Psen2/Dbnl/Sipa1l1/Cux2/Stau2/Abhd17a/Lrp4/Dbn1/Dnaja3/Hspa8/Rheb/Arf6/Stk38/Myh10/Actr3/Lzts3/Tsc2/Cfl1	44
GO:0032446	BP	GO:0032446	protein modification by small protein conjugation	84/1480	712/28891	9.73616e-13	3.9394e-11	2.50338e-11	Ubc/Ubb/Itch/Nedd4l/Stub1/Wwp1/Marchf7/Mgrn1/Chp1/Wwp2/Arrdc3/Ndfip1/Tgfbr1/Rnf19a/Mib1/Cand1/Hspbp1/Kcmf1/Ubr2/Smurf2/Bag5/Cand2/Znrf3/Ankib1/Ube3c/Plk1/Rnf144a/Rnf19b/Nedd4/Tsg101/Cul7/Tollip/Amfr/Klhl22/Ivns1abp/Wbp1l/Rnf13/Rnf11/Klhl13/Gsk3b/Ppia/Vps28/Cul3/Bag2/Trim32/Ltn1/Dtl/Psen1/Cul2/Fyn/Dtx2/Psen2/Plaa/Rffl/Sqstm1/Dnaja3/Pin1/Marchf9/Trim27/Fbxl17/Usp4/Cul1/Dnaja1/Wdr77/Smad7/Trim21/Cul…	84
GO:0051648	BP	GO:0051648	vesicle localization	40/1480	214/28891	1.00801e-12	4.05025e-11	2.57382e-11	Hgs/Vamp7/Steap3/Sdcbp/Chp1/Stam/Syt4/Syt11/Stard3/Preb/Tmed10/Mreg/Gbf1/Pdcd6ip/Tsg101/Tmed9/Kif5b/Naglu/Cul3/Psen1/Arf1/Myo6/Myo1c/Map2k1/Myo5a/Vps4b/Tcirg1/Myo19/Exoc1/Exoc4/Gpr143/Scrib/Exoc8/Exoc2/Myo1e/Pdcd6/Vps4a/Fbxw11/Uso1/Trappc5	40
GO:0006753	BP	GO:0006753	nucleoside phosphate metabolic process	67/1480	505/28891	1.0451e-12	4.17031e-11	2.65012e-11	Atp7a/Gpd2/Slc4a7/Prpsap2/Far1/Ndufs1/Prps2/Adcy3/Adcy7/Atp5pd/Prps1l3/Prps1/Acsl3/Prpsap1/Umps/Atp6v1a/Atp6v1b2/Ndufa10/Dcakd/Tk1/Gpat4/Rhoa/Acsl5/Atp5f1b/Ndufa9/Vdac1/Adcy6/Ndufb10/Atp5f1a/Atp5pb/Atp5po/Ctps1/Ndufs3/Ndufv1/Suclg2/Fis1/Tyms/Ndufs7/Map2k1/Hspa8/Idh3a/Pdhb/Rrm2/Atp5f1d/Mccc2/Idh3g/Ndufa13/Atp5f1c/Ndufs8/Atp5mf/Nudt5/Mapk1/Pgd/Sdhb/Stoml2/Adsl/Mdh1/Ndufa12/Flcn/Ndufa6/Idh1/Atp5me/E…	67
GO:0051604	BP	GO:0051604	protein maturation	69/1480	529/28891	1.07731e-12	4.2694e-11	2.71308e-11	Hspa1b/Flna/Stub1/Mmp14/Dnajc7/Adam10/Canx/Vps35/Galnt2/Timm23/Asph/Bag5/Bace2/Hsph1/Adam17/Cct8/Cct7/Hspa4/Adam9/Ldlrad3/Qsox2/Fkbp8/Cpd/Dnajb12/Prkacb/Tbcd/Atp6ap2/Snx12/Naglu/Ppia/Hspa2/Timm17a/Ncstn/Bag2/Yme1l1/Mms19/Psen1/Cct4/Psen2/Dnaja2/Ppig/Afg3l1/Xpnpep3/Dnajb6/Dnaja3/Hspa8/Cct3/Pgk1/Bag1/Cdc37/Dnaja1/Cct6a/H13/Cisd1/Yipf5/Ahsa1/Rhbdd1/Tor2a/Hspa13/Glg1/Stoml2/Myh9/Afg3l2/Pik3c3/Ppie/Sd…	69
GO:0043009	BP	GO:0043009	chordate embryonic development	96/1480	869/28891	1.13984e-12	4.48646e-11	2.85102e-11	Bmpr2/Notch2/Plxnb2/Tgfbr2/Acvr2a/Mmp14/Acvrl1/Kidins220/Cmip/Acvr1/Plxna2/Bmpr1a/Tgfbr1/Phgdh/Adam10/Smpd4/Mib1/Gja1/Rala/Gna13/Atp11a/Gna12/Pdgfra/Itgb1/Acvr1b/Sema4c/Fkbp8/Prkacb/Vangl2/Add1/Atp6ap2/Tjp1/Man2a1/Tab1/Mthfd1l/Cul3/Luzp1/Slc30a1/Nle1/Kif20b/Bnip2/Psen1/Coprs/Apob/Wdtc1/Sox10/Psen2/Grb2/Rtn4/Sf3b1/Dbn1/Map2k1/Gnas/Dnajb6/Tmed2/Cr1l/Wdr74/Ccnb2/Tapt1/Specc1/Sco2/Nr2f2/Myh10/Kdm2a/C…	96
GO:0001944	BP	GO:0001944	vasculature development	92/1480	817/28891	1.16205e-12	4.51409e-11	2.86858e-11	Flna/Plxnd1/Bmpr2/Notch2/Nrp2/Hgs/Atp7a/Tgfbr2/Ptprm/Acvrl1/Slc4a7/Ephb4/Acvr1/Apold1/Bmpr1a/Tgfbr1/Adam10/Spred1/Gaa/Mib1/Tnfrsf1a/Gja1/Kit/Ldlr/Eng/Lrp5/Gna13/Pdgfra/Itgb1/Adgrg1/Nedd4/Snx17/Cul7/Unc5b/Sema6a/Rhoa/Antxr1/Adamts1/Vangl2/Add1/Slc12a2/Atp5f1b/Tjp1/Naglu/Bax/Tab1/Nus1/Rhoj/Acvr2b/Mcam/Rhob/Luzp1/Dnm2/Cald1/Psen1/Lgals8/Apob/Nrp1/Rras/Rtn4/Ackr3/Qki/Rnh1/Map2k1/Vps4b/Tmed2/Pgk1/Stat…	92
GO:0009205	BP	GO:0009205	purine ribonucleoside triphosphate metabolic process	34/1480	160/28891	1.16246e-12	4.51409e-11	2.86858e-11	Atp7a/Ndufs1/Atp5pd/Atp6v1a/Atp6v1b2/Ndufa10/Rhoa/Atp5f1b/Ndufa9/Ndufb10/Atp5f1a/Atp5pb/Atp5po/Ndufs3/Ndufv1/Fis1/Ndufs7/Map2k1/Hspa8/Atp5f1d/Ndufa13/Atp5f1c/Ndufs8/Atp5mf/Nudt5/Sdhb/Stoml2/Ndufa12/Flcn/Ndufa6/Atp5me/Entpd7/Gtpbp1/Atp5mc1	34
GO:0140056	BP	GO:0140056	organelle localization by membrane tethering	24/1480	81/28891	1.2211e-12	4.7102e-11	2.9932e-11	Stx12/Stx6/Stxbp2/Stxbp3/Atp2a2/Stx7/Ralb/Stx8/Stxbp1/Esyt2/Stx2/Rab8b/Psen2/Rab8a/Vapb/Exoc1/Stx16/Exoc4/Ahcyl1/Rab13/Exoc8/Exoc2/Stx11/Uso1	24
GO:0046034	BP	GO:0046034	ATP metabolic process	31/1480	135/28891	1.30812e-12	5.01242e-11	3.18526e-11	Atp7a/Ndufs1/Atp5pd/Atp6v1a/Atp6v1b2/Ndufa10/Atp5f1b/Ndufa9/Ndufb10/Atp5f1a/Atp5pb/Atp5po/Ndufs3/Ndufv1/Fis1/Ndufs7/Map2k1/Hspa8/Atp5f1d/Ndufa13/Atp5f1c/Ndufs8/Atp5mf/Nudt5/Sdhb/Stoml2/Ndufa12/Flcn/Ndufa6/Atp5me/Atp5mc1	31
GO:0008285	BP	GO:0008285	negative regulation of cell population proliferation	101/1480	938/28891	1.36695e-12	5.20339e-11	3.30661e-11	Epha3/Flna/Bmpr2/Itch/Ptprs/Ddr1/Marchf7/Tgfbr2/Ptprm/Slc4a2/Ptprf/Acvrl1/Ndfip1/Plxnb1/Tgfbr1/Itm2c/Cers2/Ifitm3/Gja1/Neo1/Eng/Morc3/Gna13/Asph/Bag5/Epha7/Lgals9/Adam17/Gna12/Itgb1/Cherp/Adgrg1/Sema4c/Irgm1/Ptprk/Tsg101/Cd44/Sema6a/Rhoa/Gsk3b/Capzb/Bax/Adcy6/B4galt7/Atp5f1a/Ppp2r5c/Ryk/Trim32/Erbb2/Dnm2/Rbm10/Tes/Psen1/Prag1/Dync1i2/Lrig2/Nrp1/Fyn/Raf1/Sox10/Pds5b/Rtn4/Ackr3/Trpv2/Lrp4/Map2k1/Dn…	101
GO:0006891	BP	GO:0006891	intra-Golgi vesicle-mediated transport	15/1480	29/28891	1.60998e-12	6.08846e-11	3.86905e-11	Rab6a/Copa/Cope/Vti1a/Vti1b/Copb2/Copg1/Copg2/Copb1/Cog5/Cog1/Cog7/Copz1/Cog3/Cog4	15
GO:0007041	BP	GO:0007041	lysosomal transport	30/1480	128/28891	1.70821e-12	6.418e-11	4.07846e-11	Hgs/Vamp7/Mgrn1/Gnptab/Snx27/Ankfy1/Stx7/Vps35/Stx8/Sort1/Nedd4/Tsg101/Rab34/M6pr/Rhob/Arf1/Mvb12a/Scyl2/Hspa8/Vps4b/Chmp5/Tmem106b/Lamp2/Zfyve16/Pik3c3/Chmp1a/Vps4a/Gak/Hook3/Sptbn5	30
GO:0045732	BP	GO:0045732	positive regulation of protein catabolic process	39/1480	208/28891	1.74433e-12	6.50289e-11	4.13241e-11	Hspa1b/Itch/Nedd4l/Stub1/Bcap31/Ndfip1/Rnf19a/Csnk1e/Gja1/Hspbp1/Vps35/Ezr/Ldlr/Ankib1/Adam9/Plk1/Rnf144a/Rnf19b/Nedd4/Sec22b/Gsk3b/Vps28/Bag2/Trim32/Snx1/Dtl/Psen1/Psen2/Tmtc3/Usp5/Rdx/Snx33/Lpcat1/Eif2ak3/Cul4a/Ndufa13/Rhbdd1/Pacsin3/Dab2	39
GO:0051960	BP	GO:0051960	regulation of nervous system development	74/1480	595/28891	1.75329e-12	6.50289e-11	4.13241e-11	Plxna1/Plxnd1/Bmpr2/Notch2/Plxnb2/Ptprs/Ptpra/Ptprd/Daam2/Adgrl2/Vamp7/Il6st/Ptprf/Syt4/Plxna2/Met/Bmpr1a/Dct/Plxnb1/Plxna4/Cip2a/Cers2/Il1rap/Kit/Ldlr/Epha7/Itgb1/Sema4c/Cul7/Sema6a/Rhoa/Ctdsp1/Man2a1/Map2k2/Gsk3b/Ryk/Trim32/Wls/Psen1/Cyfip1/Nrp1/Prmt5/Sox10/Dbnl/Cux2/Rtn4/Trpv2/Qki/Stau2/Lrp4/Dbn1/Adgre5/Map2k1/Efna5/Ilk/Rheb/Clstn1/Bag1/Srrt/Eif2ak3/Actr3/Ppp1cc/Slc7a5/Ist1/Rpl4/Fig4/Tsc2/Dag1…	74
GO:0006163	BP	GO:0006163	purine nucleotide metabolic process	61/1480	444/28891	2.42996e-12	8.95526e-11	5.69082e-11	Atp7a/Gpd2/Slc4a7/Prpsap2/Far1/Ndufs1/Prps2/Adcy3/Adcy7/Atp5pd/Prps1l3/Prps1/Acsl3/Prpsap1/Atp6v1a/Atp6v1b2/Ndufa10/Dcakd/Gpat4/Rhoa/Acsl5/Atp5f1b/Ndufa9/Vdac1/Adcy6/Ndufb10/Atp5f1a/Atp5pb/Atp5po/Ndufs3/Ndufv1/Suclg2/Fis1/Ndufs7/Map2k1/Hspa8/Idh3a/Pdhb/Atp5f1d/Mccc2/Idh3g/Ndufa13/Atp5f1c/Ndufs8/Atp5mf/Nudt5/Pgd/Sdhb/Stoml2/Adsl/Mdh1/Ndufa12/Flcn/Ndufa6/Idh1/Atp5me/Entpd7/G6pdx/Gtpbp1/Atp5mc1/Acad…	61
GO:0072521	BP	GO:0072521	purine-containing compound metabolic process	64/1480	479/28891	2.46245e-12	9.01757e-11	5.73042e-11	Atp7a/Gpd2/Slc4a7/Prpsap2/Far1/Ndufs1/Prps2/Adcy3/Adcy7/Atp5pd/Prps1l3/Prps1/Acsl3/Prpsap1/Atp6v1a/Atp6v1b2/Ndufa10/Dcakd/Gpat4/Rhoa/Acsl5/Atp5f1b/Ndufa9/Vdac1/Adcy6/Ndufb10/Atp5f1a/Atp5pb/Atp5po/Ndufs3/Ndufv1/Suclg2/Fis1/Ndufs7/Map2k1/Hspa8/Idh3a/Pdhb/Atp5f1d/Mccc2/Idh3g/Ndufa13/Atp5f1c/Ndufs8/Atp5mf/Nudt5/Pgd/Sdhb/Pcmt1/Stoml2/Adsl/Mdh1/Ndufa12/Flcn/Ndufa6/Idh1/Atp5me/Entpd7/G6pdx/Shmt2/Gtpbp1/…	64
GO:0110053	BP	GO:0110053	regulation of actin filament organization	46/1480	280/28891	2.52076e-12	9.17302e-11	5.8292e-11	Flna/Daam2/Kirrel1/Met/Tgfbr1/Gja1/Ssh1/Sh3pxd2b/Capza2/Capza1/Rhoa/Add1/Tjp1/Cdc42ep1/Sorbs3/Capzb/Phldb2/Rhoc/Arf1/Cracd/Sptbn1/Rac1/Cyfip1/Nrp1/Coro2b/Arfgef1/Dbnl/Sptan1/Grb2/Flii/Rnh1/Hax1/Dbn1/Myo1c/Add3/Lima1/Rdx/Arf6/Arpc2/Trim27/Tmod3/Actr3/Pfn1/Bag4/Cfl1/Dlg1	46
GO:0050767	BP	GO:0050767	regulation of neurogenesis	65/1480	494/28891	3.31559e-12	1.199e-10	7.61932e-11	Plxna1/Plxnd1/Bmpr2/Notch2/Plxnb2/Ptprs/Ptpra/Ptprd/Daam2/Vamp7/Il6st/Ptprf/Syt4/Plxna2/Met/Bmpr1a/Dct/Plxnb1/Plxna4/Cip2a/Cers2/Kit/Ldlr/Epha7/Itgb1/Sema4c/Cul7/Sema6a/Ctdsp1/Man2a1/Map2k2/Gsk3b/Ryk/Trim32/Wls/Psen1/Cyfip1/Nrp1/Prmt5/Sox10/Dbnl/Cux2/Rtn4/Trpv2/Qki/Stau2/Lrp4/Dbn1/Map2k1/Efna5/Ilk/Rheb/Bag1/Srrt/Actr3/Ppp1cc/Slc7a5/Ist1/Rpl4/Tsc2/Dag1/Vim/Rab21/Hook3/Chd7	65
GO:0009792	BP	GO:0009792	embryo development ending in birth or egg hatching	96/1480	886/28891	3.50357e-12	1.25911e-10	8.00129e-11	Bmpr2/Notch2/Plxnb2/Tgfbr2/Acvr2a/Mmp14/Acvrl1/Kidins220/Cmip/Acvr1/Plxna2/Bmpr1a/Tgfbr1/Phgdh/Adam10/Smpd4/Mib1/Gja1/Rala/Gna13/Atp11a/Gna12/Pdgfra/Itgb1/Acvr1b/Sema4c/Fkbp8/Prkacb/Vangl2/Add1/Atp6ap2/Tjp1/Man2a1/Tab1/Mthfd1l/Cul3/Luzp1/Slc30a1/Nle1/Kif20b/Bnip2/Psen1/Coprs/Apob/Wdtc1/Sox10/Psen2/Grb2/Rtn4/Sf3b1/Dbn1/Map2k1/Gnas/Dnajb6/Tmed2/Cr1l/Wdr74/Ccnb2/Tapt1/Specc1/Sco2/Nr2f2/Myh10/Kdm2a/C…	96
GO:0046486	BP	GO:0046486	glycerolipid metabolic process	55/1480	380/28891	3.67258e-12	1.3117e-10	8.33549e-11	Il6st/Pi4k2b/Abca3/Pi4k2a/Pip4p2/Pgs1/Smpd4/Pisd/Far1/Ldlr/Tamm41/Vac14/Acsl3/Pigs/Rab38/Srebf1/Abhd12/Gpat4/Acsl5/Sacm1l/Lpcat2/Napepld/Faah/Dagla/Pigt/Ptpn11/Fabp5/Pign/Gnpat/Apob/Pi4ka/Pigk/Abhd16a/Daglb/Pigg/Gpaa1/Serinc1/Cds2/Gk/Dgke/Pip4p1/Gdpd1/Lpcat1/Bpnt1/Dpm1/Cdipt/Impa2/Selenoi/Pip5k1a/Fig4/Pik3c3/Ctdnep1/Pigu/Cept1/Mboat2	55
GO:0060284	BP	GO:0060284	regulation of cell development	103/1480	984/28891	4.50334e-12	1.59855e-10	1.01583e-10	Plxna1/Plxnd1/Bmpr2/Notch2/Plxnb2/Ptprs/Ptpra/Ptprd/Daam2/Vamp7/Il6st/Tgfbr2/Acvr2a/Mmp14/Slc4a2/Ptprf/Tmem176b/Syt4/Plxna2/Met/Bmpr1a/Dct/Ndfip1/Plxnb1/Tmem176a/Plxna4/Cip2a/Cers2/Tnfrsf1a/Gja1/Kit/Ldlr/Clptm1/Epha7/Lgals9/Itgb1/Fam210b/Acvr1b/Sema4c/Irgm1/Cul7/Cd44/Sema6a/Rhoa/Ctdsp1/Add1/Man2a1/Map2k2/Gsk3b/Atp11c/Ryk/Trim32/Erbb2/Wls/Psen1/Rac1/Cyfip1/Nrp1/Prmt5/Sox10/Dbnl/Cux2/Rtn4/Trpv2/Qki…	103
GO:0050801	BP	GO:0050801	monoatomic ion homeostasis	76/1480	633/28891	5.08749e-12	1.79158e-10	1.1385e-10	Flna/Slc12a7/Atp7a/Bcap31/Steap3/Slc4a2/Atp2c1/Chp1/Slc4a7/Atp1a1/Atp6v0d1/Atp2b1/Ndfip1/Ccdc47/Atp13a3/Cnnm3/Atp1a4/Slc12a9/Atp2a2/Cnnm4/Tfrc/Aplp2/Neo1/Atp6v0a2/Asph/Hvcn1/Slc4a8/Tm9sf4/Slc45a2/Atp6v1a/Slc12a4/Cherp/Rab38/Atp6v1b2/Atp1b3/Abcb6/Immt/Atp6ap2/Slc12a2/Atp5f1b/Naglu/Bax/Atp6v0a1/Slc30a1/Abcb7/Psen1/Slc24a5/Arf1/Fis1/Tmc8/Thada/Psen2/Tmem9/Vapb/Fkbp1a/Stk39/Myo5a/Ccdc115/Tmem175/Tcir…	76
GO:0098660	BP	GO:0098660	inorganic ion transmembrane transport	93/1480	852/28891	5.10908e-12	1.79158e-10	1.1385e-10	Flna/Nedd4l/Slc12a7/Atp7a/Steap3/Atp2c1/Chp1/Atp1a1/Atp6v0d1/Atp2b1/Lrrc8a/Wwp2/Snx27/Atp1a4/Slc12a9/Atp2a2/Slc6a6/Abcc5/Atp6v1h/Tmem168/Stom/Atp6v0a2/Asph/Atp5pd/Hvcn1/Slc4a8/Slc25a10/Slc20a1/Ano6/Itgb1/Slc45a2/Slc20a2/Atp6v1a/Slc12a4/Cherp/Nedd4/Atp6v1b2/Atp1b3/Panx1/Abcb6/Kif5b/Atp6ap2/Slc12a2/Atp5f1b/Atp6v1e1/Bax/Vdac1/Hspa2/Atp5f1a/Atp5pb/Atp5po/Atp6v0a1/P2rx4/Slc30a1/Abcb7/Dnm2/Atp6v1d/Slc2…	93
GO:0008360	BP	GO:0008360	regulation of cell shape	31/1480	142/28891	5.40554e-12	1.88412e-10	1.19731e-10	Plxna1/Plxnd1/Plxnb2/Myo10/Plxna2/Plxnb1/Plxna4/Rhou/Kit/Ezr/Gna13/Gna12/Cdc42ep1/Pakap/Rhoj/Epb41/Dapk3/Fam171a1/Prag1/Rac1/Cyfip1/Palm/Fyn/Rdx/Myh14/Myh10/Arhgdia/Myl12a/Myh9/Cfl1/Dlg1	31
GO:0043484	BP	GO:0043484	regulation of RNA splicing	36/1480	187/28891	5.54838e-12	1.92233e-10	1.22159e-10	Slc38a2/Srsf9/Clk3/Tra2b/Setx/Srsf5/Srsf6/Celf2/Srsf10/Srrm1/Tra2a/Clns1a/Magoh/Srsf3/Thrap3/Rbm10/Prmt5/Rbm5/Qki/Larp7/Hspa8/Rbm25/Sf3b5/Wtap/Wdr77/Sf3b3/Sfswap/Hnrnph1/Hnrnph3/Fus/Rbfox2/Tmbim6/Ythdc1/Sf3b4/Mbnl1/Ptbp2	36
GO:0055080	BP	GO:0055080	monoatomic cation homeostasis	75/1480	622/28891	5.71173e-12	1.96715e-10	1.25007e-10	Flna/Slc12a7/Atp7a/Bcap31/Steap3/Slc4a2/Atp2c1/Chp1/Slc4a7/Atp1a1/Atp6v0d1/Atp2b1/Ndfip1/Ccdc47/Atp13a3/Cnnm3/Atp1a4/Slc12a9/Atp2a2/Cnnm4/Tfrc/Aplp2/Neo1/Atp6v0a2/Asph/Hvcn1/Slc4a8/Tm9sf4/Slc45a2/Atp6v1a/Slc12a4/Cherp/Rab38/Atp6v1b2/Atp1b3/Abcb6/Immt/Atp6ap2/Slc12a2/Atp5f1b/Naglu/Bax/Atp6v0a1/Slc30a1/Abcb7/Psen1/Slc24a5/Arf1/Fis1/Tmc8/Thada/Psen2/Tmem9/Vapb/Fkbp1a/Myo5a/Ccdc115/Tmem175/Tcirg1/Atp…	75
GO:0009144	BP	GO:0009144	purine nucleoside triphosphate metabolic process	34/1480	169/28891	5.92888e-12	2.02985e-10	1.28992e-10	Atp7a/Ndufs1/Atp5pd/Atp6v1a/Atp6v1b2/Ndufa10/Rhoa/Atp5f1b/Ndufa9/Ndufb10/Atp5f1a/Atp5pb/Atp5po/Ndufs3/Ndufv1/Fis1/Ndufs7/Map2k1/Hspa8/Atp5f1d/Ndufa13/Atp5f1c/Ndufs8/Atp5mf/Nudt5/Sdhb/Stoml2/Ndufa12/Flcn/Ndufa6/Atp5me/Entpd7/Gtpbp1/Atp5mc1	34
GO:0034220	BP	GO:0034220	monoatomic ion transmembrane transport	97/1480	909/28891	6.49418e-12	2.21031e-10	1.40459e-10	Flna/Nedd4l/Slc12a7/Atp7a/Steap3/Atp2c1/Chp1/Abcb1b/Atp1a1/Atp6v0d1/Atp2b1/Lrrc8a/Wwp2/Snx27/Atp1a4/Slc12a9/Atp2a2/Slc6a6/Abcc5/Atp6v1h/Tmem168/Stom/Atp6v0a2/Vdac2/Asph/Atp5pd/Hvcn1/Slc4a8/Ano6/Itgb1/Slc45a2/Atp6v1a/Slc12a4/Cherp/Nedd4/Atp6v1b2/Atp1b3/Panx1/Abcb6/Kif5b/Lrrc8d/Atp6ap2/Slc12a2/Atp5f1b/Atp6v1e1/Bax/Vdac1/Hspa2/Atp5f1a/Atp5pb/Atp5po/Atp6v0a1/P2rx4/Slc30a1/Abcb7/Dnm2/Atp6v1d/Lrrc8c/Vd…	97
GO:0030010	BP	GO:0030010	establishment of cell polarity	34/1480	170/28891	7.05122e-12	2.38587e-10	1.51615e-10	Fat1/Zw10/Gja1/Itgb1/Igf1r/Gbf1/Plk1/Rab10/Rhoa/Vangl2/Gsk3b/Flot2/Phldb2/Plekhg3/Kif20b/Sipa1/Arfgef1/Myo18a/Arf6/Tcirg1/Exoc4/Sipa1l3/Gpsm2/Scrib/Myh9/Amotl1/Tsc2/Spry2/Fbxw11/Sapcd2/Frmd4a/Cfl1/Golph3/Pard3	34
GO:0061025	BP	GO:0061025	membrane fusion	34/1480	171/28891	8.37377e-12	2.8169e-10	1.79006e-10	Vamp7/Stx12/Chp1/Stx6/Syt4/Syt11/Ankfy1/Stx7/Stx8/Stxbp1/Rab34/Kif5b/Sec22b/Tom1/Stx2/Rab8b/Vamp3/Myof/Vti1a/Vti1b/Rab8a/Snap47/Chmp5/Tmem175/Vamp4/Stx16/Yipf5/Rab13/Stx11/Yipf4/Chmp1a/Vps4a/Gosr1/Uso1	34
GO:0001568	BP	GO:0001568	blood vessel development	87/1480	782/28891	9.27395e-12	3.10168e-10	1.97103e-10	Flna/Plxnd1/Bmpr2/Notch2/Nrp2/Hgs/Atp7a/Tgfbr2/Ptprm/Acvrl1/Ephb4/Acvr1/Apold1/Bmpr1a/Tgfbr1/Spred1/Gaa/Mib1/Tnfrsf1a/Gja1/Ldlr/Eng/Lrp5/Gna13/Pdgfra/Itgb1/Adgrg1/Nedd4/Snx17/Cul7/Unc5b/Sema6a/Rhoa/Antxr1/Adamts1/Vangl2/Add1/Slc12a2/Atp5f1b/Tjp1/Naglu/Bax/Tab1/Nus1/Rhoj/Acvr2b/Mcam/Rhob/Luzp1/Dnm2/Cald1/Psen1/Apob/Nrp1/Rras/Rtn4/Ackr3/Qki/Rnh1/Map2k1/Vps4b/Tmed2/Pgk1/Stat1/Bsg/Smad7/Nr2f2/Myh10/J…	87
GO:0072665	BP	GO:0072665	protein localization to vacuole	23/1480	81/28891	9.56487e-12	3.18059e-10	2.02118e-10	Hgs/Vamp7/Gnptab/Stam/Sort1/Irgm1/Nedd4/Lamtor1/M6pr/Ptpn23/Vps28/Vps37b/Rtn4/Sqstm1/Rragc/Lmbrd1/Hspa8/Glmp/Lamp2/Rraga/Zfyve16/Pik3c3/Vps4a	23
GO:0007029	BP	GO:0007029	endoplasmic reticulum organization	25/1480	96/28891	1.00076e-11	3.30881e-10	2.10266e-10	Ccdc47/Smpd4/Ncln/Retreg3/Rab10/Esyt2/Rab18/Sec61a1/Tmem33/Stx18/Rtn3/Rtn4/Vapb/Myo5a/Tmed2/Arl6ip1/Use1/Get3/Eif2ak3/Atl2/Emc2/Reep5/Gak/Atl3/Atl1	25
GO:0030641	BP	GO:0030641	regulation of cellular pH	24/1480	89/28891	1.15036e-11	3.78179e-10	2.40322e-10	Slc4a2/Chp1/Slc4a7/Atp6v0d1/Atp1a4/Atp6v0a2/Hvcn1/Slc4a8/Tm9sf4/Slc45a2/Rab38/Atp6v1b2/Atp6ap2/Atp5f1b/Atp6v0a1/Tmem9/Ccdc115/Tmem175/Tcirg1/Atp6v0c/Tmem106b/Slc9a8/Mapk1/Cln6	24
GO:0030833	BP	GO:0030833	regulation of actin filament polymerization	31/1480	146/28891	1.16414e-11	3.8055e-10	2.41829e-10	Daam2/Kirrel1/Ssh1/Capza2/Capza1/Rhoa/Add1/Cdc42ep1/Capzb/Cracd/Sptbn1/Rac1/Cyfip1/Arfgef1/Dbnl/Sptan1/Grb2/Flii/Hax1/Dbn1/Myo1c/Add3/Rdx/Arf6/Arpc2/Tmod3/Actr3/Pfn1/Bag4/Cfl1/Dlg1	31
GO:0031345	BP	GO:0031345	negative regulation of cell projection organization	39/1480	221/28891	1.23194e-11	4.0045e-10	2.54475e-10	Epha3/Flna/Ptprs/Ptprf/Itm2c/Cers2/Neo1/Bag5/Epha7/Adam17/Itgb1/Sema4c/Sema6a/Rhoa/Gsk3b/Capzb/Adcy6/Ryk/Dnm2/Psen1/Prag1/Dync1i2/Lrig2/Nrp1/Fyn/Rtn4/Lrp4/Arf6/Actr3/Thoc2/Cib1/Tsc2/Spry2/Vim/Dab2/Map4k4/Cfl1/Gak/Cyth2	39
GO:0072522	BP	GO:0072522	purine-containing compound biosynthetic process	41/1480	241/28891	1.24067e-11	4.01034e-10	2.54846e-10	Slc4a7/Prpsap2/Ndufs1/Prps2/Adcy3/Adcy7/Atp5pd/Prps1l3/Prps1/Prpsap1/Ndufa10/Dcakd/Acsl5/Atp5f1b/Ndufa9/Vdac1/Adcy6/Ndufb10/Atp5f1a/Atp5pb/Atp5po/Ndufs3/Ndufv1/Ndufs7/Map2k1/Pdhb/Atp5f1d/Ndufa13/Atp5f1c/Ndufs8/Atp5mf/Sdhb/Stoml2/Adsl/Ndufa12/Flcn/Ndufa6/Atp5me/G6pdx/Shmt2/Atp5mc1	41
GO:0006650	BP	GO:0006650	glycerophospholipid metabolic process	44/1480	272/28891	1.28044e-11	4.1159e-10	2.61554e-10	Pi4k2b/Abca3/Pi4k2a/Pip4p2/Pgs1/Smpd4/Pisd/Far1/Ldlr/Tamm41/Vac14/Acsl3/Pigs/Rab38/Abhd12/Gpat4/Sacm1l/Lpcat2/Napepld/Pigt/Fabp5/Pign/Pi4ka/Pigk/Abhd16a/Pigg/Gpaa1/Serinc1/Cds2/Dgke/Pip4p1/Gdpd1/Lpcat1/Bpnt1/Dpm1/Cdipt/Impa2/Selenoi/Pip5k1a/Fig4/Pik3c3/Pigu/Cept1/Mboat2	44
GO:1902903	BP	GO:1902903	regulation of supramolecular fiber organization	55/1480	393/28891	1.40792e-11	4.50068e-10	2.86006e-10	Flna/Daam2/Usp8/Kirrel1/Met/Tgfbr1/Gja1/Ldlr/Ssh1/Sh3pxd2b/Capza2/Capza1/Rhoa/Tbcd/Add1/Tjp1/Cdc42ep1/Sorbs3/Capzb/Phldb2/Rhoc/Dapk3/Slain2/Psen1/Arf1/Cracd/Sptbn1/Rac1/Cyfip1/Nrp1/Coro2b/Arfgef1/Dbnl/Sptan1/Grb2/Flii/Rnh1/Hax1/Dbn1/Myo1c/Add3/Lima1/Hspa8/Rdx/Arf6/Arpc2/Trim27/Tmod3/Actr3/Cib1/Drg1/Pfn1/Bag4/Cfl1/Dlg1	55
GO:0022613	BP	GO:0022613	ribonucleoprotein complex biogenesis	59/1480	440/28891	1.52888e-11	4.8605e-10	3.08871e-10	Xpo1/Setx/Snrpb/Srsf6/Celf2/Snrpd1/Srsf10/Ipo9/Clns1a/Pdcd11/Nle1/Riok1/Prpf31/Rbm10/Snrnp200/Prmt5/Rbm5/Sf3b1/Nop9/Fbl/Wdr74/Rpl10a/Lyar/Snrpd3/Srpk1/Usp4/Exosc9/Wdr77/Sfswap/Cul4a/Rpl7a/Exosc5/Rcl1/Prpf8/Dnttip2/Gnl3l/Tsr1/Exosc7/Rps21/Exosc6/Mrpl10/Tarbp2/Utp4/Mrps7/Suv39h1/Ythdc1/Nob1/Ruvbl2/Ddx28/Rrp1/Eif6/Cdc73/Mbnl1/Ptbp2/Surf6/Polr2d/Mterf3/Ddx54/Chd7	59
GO:0009141	BP	GO:0009141	nucleoside triphosphate metabolic process	35/1480	184/28891	1.55479e-11	4.91585e-10	3.12389e-10	Atp7a/Ndufs1/Atp5pd/Atp6v1a/Atp6v1b2/Ndufa10/Rhoa/Atp5f1b/Ndufa9/Ndufb10/Atp5f1a/Atp5pb/Atp5po/Ctps1/Ndufs3/Ndufv1/Fis1/Ndufs7/Map2k1/Hspa8/Atp5f1d/Ndufa13/Atp5f1c/Ndufs8/Atp5mf/Nudt5/Sdhb/Stoml2/Ndufa12/Flcn/Ndufa6/Atp5me/Entpd7/Gtpbp1/Atp5mc1	35
GO:0006164	BP	GO:0006164	purine nucleotide biosynthetic process	40/1480	233/28891	1.64558e-11	5.17463e-10	3.28833e-10	Slc4a7/Prpsap2/Ndufs1/Prps2/Adcy3/Adcy7/Atp5pd/Prps1l3/Prps1/Prpsap1/Ndufa10/Dcakd/Acsl5/Atp5f1b/Ndufa9/Vdac1/Adcy6/Ndufb10/Atp5f1a/Atp5pb/Atp5po/Ndufs3/Ndufv1/Ndufs7/Map2k1/Pdhb/Atp5f1d/Ndufa13/Atp5f1c/Ndufs8/Atp5mf/Sdhb/Stoml2/Adsl/Ndufa12/Flcn/Ndufa6/Atp5me/G6pdx/Atp5mc1	40
GO:0009896	BP	GO:0009896	positive regulation of catabolic process	68/1480	550/28891	1.83884e-11	5.75111e-10	3.65467e-10	Hspa1b/Itch/Nedd4l/Stub1/Bcap31/Tmem59/Ndfip1/Sptlc1/Rnf19a/Csnk1e/Gja1/Hspbp1/Vps35/Ralb/Ezr/Ldlr/Insr/Ankib1/Adam9/Plk1/Rnf144a/Rnf19b/Irgm1/Nedd4/Acsl5/Sec22b/Gsk3b/Bag3/Bax/Tom1/Vdac1/Vps28/Bag2/Trim32/Snx1/Dtl/Psen1/Sptlc2/Ptpn1/Psen2/Daglb/Tmtc3/Sqstm1/Usp5/Map2k1/Rdx/Prkaa1/Snx33/Lpcat1/Exosc9/Eif2ak3/Trim21/Cul4a/Exosc5/Ndufa13/Rhbdd1/Exosc7/Hmox1/Ormdl3/Pacsin3/Flcn/Ppp2ca/Tsc2/Tpcn1/Dab…	68
GO:0061564	BP	GO:0061564	axon development	69/1480	563/28891	1.94593e-11	6.02103e-10	3.8262e-10	Tubb2b/Plxna1/Epha3/Flna/Unc5c/Plxnd1/Bmpr2/Nrp2/Plxnb2/Ptprs/Ddr1/Ptprm/Ptprf/Plxna2/Plxnb1/Plxna4/Cers2/Aplp2/Neo1/Epha7/Adam17/Itgb1/Igf1r/Stxbp1/Sema4c/Unc5b/Rab10/Sema6a/Kif5b/Vangl2/Map2k2/Gsk3b/Ryk/Trim32/Erbb2/Lgr4/Dnm2/Ptpn11/Psen1/Boc/Ablim1/Rac1/Cyfip1/Lrig2/Nrp1/Dbnl/Sipa1l1/Rtn4/Trpv2/Rab8a/Lrp4/Dbn1/Map2k1/Efna5/Ilk/Tfap4/Bsg/Actbl2/Myh10/Actr3/Ist1/Rpl4/Afg3l2/Tsc2/Dag1/Plp1/Vim/Ra…	69
GO:0050769	BP	GO:0050769	positive regulation of neurogenesis	49/1480	329/28891	1.94596e-11	6.02103e-10	3.8262e-10	Plxna1/Plxnd1/Bmpr2/Notch2/Plxnb2/Ptpra/Ptprd/Vamp7/Il6st/Ptprf/Plxna2/Met/Dct/Plxnb1/Plxna4/Cip2a/Kit/Itgb1/Cul7/Man2a1/Map2k2/Gsk3b/Trim32/Wls/Cyfip1/Nrp1/Prmt5/Sox10/Dbnl/Cux2/Rtn4/Trpv2/Qki/Stau2/Dbn1/Map2k1/Efna5/Ilk/Rheb/Bag1/Srrt/Actr3/Ppp1cc/Slc7a5/Ist1/Rpl4/Dag1/Vim/Rab21	49
GO:0044089	BP	GO:0044089	positive regulation of cellular component biogenesis	68/1480	551/28891	1.99558e-11	6.14172e-10	3.9029e-10	Flna/Hgs/Ptprd/Atp7a/Stub1/Adgrl2/Kirrel1/Abca3/Sdcbp/Stam/Met/Tgfbr1/Il1rap/Cand1/Tfrc/Kit/Rala/Ralb/Sh3pxd2b/Pdcd6ip/Tsg101/Rhoa/Cdk2/Cdc42ep1/Gsk3b/Sorbs3/Bax/Phldb2/Dync1h1/Mavs/Rhoc/Dnm2/Slain2/Ptpn11/Cracd/Stx18/Rac1/Cyfip1/Nrp1/Palm/Grb2/Cux2/Stau2/Myo1c/Adgre5/Efna5/Vps4b/Arf6/Arpc2/Clstn1/Tapt1/Gpsm2/Actr3/Gnl3l/Drg1/Myh9/Pfn1/Pphln1/Gpm6a/Ppp2ca/Phldb1/Bag4/Dag1/Vps4a/Map4k4/Cfl1/Dlg1/A…	68
GO:0006470	BP	GO:0006470	protein dephosphorylation	40/1480	235/28891	2.16499e-11	6.62786e-10	4.21182e-10	Ptprs/Ptpra/Ptprd/Ptprm/Ptprf/Pgam5/Ppp6r1/Ssh1/Gna12/Ptprk/Ctdsp2/Ctdsp1/Ppp2r5a/Mgat5/Ptpn23/Ppp6c/Ppia/Ppp2r1b/Ppp2r5c/Rngtt/Ptpn11/Ppp6r3/Ptp4a1/Ptpn1/Vrk3/Ppp2r5e/Pin1/Ppm1b/Ppp1cb/Ptp4a2/Ppp2r5d/Ppp1ca/Ppp1cc/Ppp1r12a/Ppp1r8/Ctdnep1/Ppp2ca/Mprip/Fbxw11/Ambra1	40
GO:0050807	BP	GO:0050807	regulation of synapse organization	47/1480	309/28891	2.3782e-11	7.24224e-10	4.60224e-10	Nrp2/Ptprs/Ptprd/Adgrl2/Ptprf/Adam10/Il1rap/Vps35/Epha7/Itgb1/Nedd4/Arf4/Rhoa/Zdhhc15/Gsk3b/Abhd17b/Rhob/Chd4/Psen1/Cyfip1/Fyn/Abhd17c/Psen2/Dbnl/Sipa1l1/Cux2/Pgrmc1/Stau2/Abhd17a/Lrp4/Dbn1/Adgre5/Rap2a/Efna5/Hspa8/Rheb/Arf6/Clstn1/Myh10/Actr3/Sparc/Lzts3/Gpm6a/Tsc2/Dag1/Cfl1/Septin11	47
GO:0032271	BP	GO:0032271	regulation of protein polymerization	37/1480	206/28891	2.41057e-11	7.30238e-10	4.64046e-10	Daam2/Kirrel1/Met/Ssh1/Vdac2/Capza2/Capza1/Rhoa/Tbcd/Add1/Cdc42ep1/Capzb/Slain2/Cracd/Sptbn1/Rac1/Cyfip1/Arfgef1/Dbnl/Sptan1/Grb2/Flii/Hax1/Dbn1/Myo1c/Add3/Rdx/Arf6/Arpc2/Tmod3/Actr3/Drg1/Pfn1/Bag4/Cfl1/Dlg1/Ambra1	37
GO:0034329	BP	GO:0034329	cell junction assembly	62/1480	481/28891	2.52342e-11	7.60443e-10	4.83241e-10	Epha3/Plxnd1/Nedd4l/Plxnb2/Ptprs/Ptpra/Ptprd/Adgrl2/Mmp14/Acvrl1/Sdcbp/Plxnb1/Il1rap/Gja1/Vps35/Cdh19/Epha7/Itgb1/Ptprk/Pdcd6ip/Capza1/Pkp4/Rhoa/Tbcd/Tjp1/Gsk3b/Phldb2/Rhoc/Dapk3/Chd4/Ptpn11/Gnpat/Rhod/Rac1/Nrp1/Coro2b/Dbnl/Sipa1l1/Cux2/Stau2/Lrp4/Myo6/Myo1c/Adgre5/Rap2a/Efna5/Arf6/Clstn1/Smad7/Actr3/Rab13/Rap1a/Plec/Myh9/Lzts3/Gpm6a/Pip5k1a/Flcn/Map4k4/Cfl1/Dlg1/Pard3	62
GO:0099072	BP	GO:0099072	regulation of postsynaptic membrane neurotransmitter receptor levels	29/1480	133/28891	2.68042e-11	8.0357e-10	5.10647e-10	Stx12/Erbin/Adam10/Snx27/Neto2/Vps35/Rala/Clptm1/Vac14/Itgb1/Nedd4/Sacm1l/Gsk3b/Flot2/Erbb2/Atad1/Rapsn/Rab8a/Myo6/Snap47/Snx6/Rap2a/Map2k1/Rdx/Clstn1/Scrib/Rap1a/Dag1/Dlg1	29
GO:0006754	BP	GO:0006754	ATP biosynthetic process	25/1480	101/28891	3.35024e-11	9.99199e-10	6.34963e-10	Ndufs1/Atp5pd/Ndufa10/Atp5f1b/Ndufa9/Ndufb10/Atp5f1a/Atp5pb/Atp5po/Ndufs3/Ndufv1/Ndufs7/Map2k1/Atp5f1d/Ndufa13/Atp5f1c/Ndufs8/Atp5mf/Sdhb/Stoml2/Ndufa12/Flcn/Ndufa6/Atp5me/Atp5mc1	25
GO:0098662	BP	GO:0098662	inorganic cation transmembrane transport	85/1480	782/28891	5.3498e-11	1.58738e-09	1.00874e-09	Flna/Nedd4l/Slc12a7/Atp7a/Steap3/Atp2c1/Chp1/Atp1a1/Atp6v0d1/Atp2b1/Wwp2/Snx27/Atp1a4/Atp2a2/Slc6a6/Abcc5/Atp6v1h/Tmem168/Stom/Atp6v0a2/Asph/Atp5pd/Hvcn1/Slc4a8/Ano6/Itgb1/Slc45a2/Atp6v1a/Slc12a4/Cherp/Nedd4/Atp6v1b2/Atp1b3/Panx1/Abcb6/Kif5b/Atp6ap2/Slc12a2/Atp5f1b/Atp6v1e1/Bax/Vdac1/Hspa2/Atp5f1a/Atp5pb/Atp5po/Atp6v0a1/P2rx4/Slc30a1/Abcb7/Dnm2/Atp6v1d/Slc24a5/Arf1/Atp6v1c1/Fyn/Psen2/Ndufa4/Trpv2…	85
GO:0006457	BP	GO:0006457	protein folding	33/1480	173/28891	5.43521e-11	1.6045e-09	1.01961e-09	Hspa1b/Stub1/Dnajc7/Canx/Bag5/Hsph1/Cct8/Cct7/Hspa4/Qsox2/Fkbp8/Dnajb12/Tbcd/Ppia/Hspa2/Cct4/Dnaja2/Ppig/Dnajb6/Dnaja3/Hspa8/Cct3/Bag1/Cdc37/Dnaja1/Cct6a/Ahsa1/Tor2a/Hspa13/Ppie/Sdf2l1/Sdf2/Ahsa2	33
GO:0050803	BP	GO:0050803	regulation of synapse structure or activity	47/1480	317/28891	5.85043e-11	1.7183e-09	1.09193e-09	Nrp2/Ptprs/Ptprd/Adgrl2/Ptprf/Adam10/Il1rap/Vps35/Epha7/Itgb1/Nedd4/Arf4/Rhoa/Zdhhc15/Gsk3b/Abhd17b/Rhob/Chd4/Psen1/Cyfip1/Fyn/Abhd17c/Psen2/Dbnl/Sipa1l1/Cux2/Pgrmc1/Stau2/Abhd17a/Lrp4/Dbn1/Adgre5/Rap2a/Efna5/Hspa8/Rheb/Arf6/Clstn1/Myh10/Actr3/Sparc/Lzts3/Gpm6a/Tsc2/Dag1/Cfl1/Septin11	47
GO:0032456	BP	GO:0032456	endocytic recycling	23/1480	88/28891	6.17338e-11	1.804e-09	1.14639e-09	Hgs/Stx12/Stx6/Snx27/Vps35/Snx3/Snx17/Ehd1/Rab35/Snx12/Ptpn23/Rab8b/Ehd4/Vps29/Vti1a/Arhgap1/Vps26a/Rab8a/Arf6/Vamp4/Stx16/Scrib/Rab13	23
GO:0007169	BP	GO:0007169	transmembrane receptor protein tyrosine kinase signaling pathway	72/1480	616/28891	6.44139e-11	1.87286e-09	1.19015e-09	Epha3/Nrp2/Hgs/Ptpra/Ddr2/Ddr1/Erbb3/Ptprf/Ephb4/Met/Kit/Rala/Ralb/Epha7/Insr/Tyro3/Pdgfra/Frk/Igf1r/Sort1/Setx/Nedd4/Srebf1/Tsg101/Arf4/Sema6a/Map2k2/Gsk3b/Nus1/Srsf3/Tyk2/Ryk/Snx5/Erbb2/Myof/Ptpn11/Psen1/Adipor1/Frs2/Rac1/Cyfip1/Lrig2/Nrp1/Fyn/Ptpn1/Raf1/Mvb12a/Psen2/Sipa1l1/Grb2/Rtn4/Gpc1/Myo1c/Map2k1/Efna5/Yes1/Prkaa1/Dstyk/Jak1/Eif2ak3/Ppp2r5d/Plekha1/Cnot9/Mapk1/Myo1e/Mertk/Shcbp1/Tsc2/Pdcd…	72
GO:0001701	BP	GO:0001701	in utero embryonic development	68/1480	566/28891	6.60496e-11	1.91081e-09	1.21427e-09	Notch2/Tgfbr2/Acvrl1/Kidins220/Cmip/Acvr1/Bmpr1a/Tgfbr1/Adam10/Smpd4/Mib1/Gja1/Gna13/Atp11a/Gna12/Pdgfra/Itgb1/Acvr1b/Add1/Tjp1/Man2a1/Tab1/Cul3/Slc30a1/Nle1/Bnip2/Coprs/Apob/Wdtc1/Sox10/Grb2/Rtn4/Sf3b1/Dbn1/Map2k1/Dnajb6/Tmed2/Cr1l/Wdr74/Ccnb2/Specc1/Sco2/Nr2f2/Myh10/Kdm2a/Cul4a/H13/Polb/Rrm2/Thoc2/Ppp1cc/Ric8a/4933434E20Rik/Mapk1/Myo1e/Myh9/Flcn/Suv39h1/Ythdc1/Eif4e2/Smarcb1/Dab2/Ttn/Birc6/Mbnl…	68
GO:0010977	BP	GO:0010977	negative regulation of neuron projection development	32/1480	165/28891	6.7542e-11	1.94427e-09	1.23553e-09	Epha3/Flna/Ptprs/Itm2c/Cers2/Neo1/Bag5/Epha7/Adam17/Sema4c/Sema6a/Rhoa/Gsk3b/Adcy6/Ryk/Psen1/Prag1/Dync1i2/Lrig2/Nrp1/Rtn4/Lrp4/Arf6/Actr3/Thoc2/Cib1/Tsc2/Vim/Dab2/Map4k4/Gak/Cyth2	32
GO:0051453	BP	GO:0051453	regulation of intracellular pH	22/1480	81/28891	7.05867e-11	2.02186e-09	1.28483e-09	Slc4a2/Chp1/Slc4a7/Atp6v0d1/Atp6v0a2/Hvcn1/Slc4a8/Tm9sf4/Slc45a2/Rab38/Atp6v1b2/Atp6ap2/Atp5f1b/Atp6v0a1/Tmem9/Ccdc115/Tmem175/Tcirg1/Atp6v0c/Tmem106b/Slc9a8/Cln6	22
GO:0009259	BP	GO:0009259	ribonucleotide metabolic process	51/1480	364/28891	7.42929e-11	2.11753e-09	1.34563e-09	Atp7a/Far1/Ndufs1/Prps2/Adcy3/Adcy7/Atp5pd/Acsl3/Umps/Atp6v1a/Atp6v1b2/Ndufa10/Dcakd/Gpat4/Rhoa/Acsl5/Atp5f1b/Ndufa9/Vdac1/Adcy6/Ndufb10/Atp5f1a/Atp5pb/Atp5po/Ctps1/Ndufs3/Ndufv1/Suclg2/Fis1/Ndufs7/Map2k1/Hspa8/Pdhb/Atp5f1d/Mccc2/Ndufa13/Atp5f1c/Ndufs8/Atp5mf/Nudt5/Sdhb/Stoml2/Adsl/Ndufa12/Flcn/Ndufa6/Atp5me/Entpd7/Gtpbp1/Atp5mc1/Acadsb	51
GO:0007265	BP	GO:0007265	Ras protein signal transduction	49/1480	342/28891	7.89503e-11	2.23925e-09	1.42298e-09	Notch2/Usp8/Sdcbp/Met/Rhou/Rala/Ralb/Gna13/Gna12/Itgb1/Adgrg1/Rras2/Stambp/Rhoa/Rab35/Vangl2/Rap2b/Rasal3/Cdc42ep1/Rhoj/Cul3/Erbb2/Nisch/Dnm2/Prag1/Rac1/Cyfip1/Nrp1/Arfgef1/Dbnl/Grb2/Rtn4/Rap2c/Arhgap42/Rap2a/Map2k1/Rdx/Arf6/Gpsm2/Rap1a/Arhgdia/Flcn/Spry2/Hacd3/Rab21/Map4k4/Garre1/Tns3/Cyth2	49
GO:0008064	BP	GO:0008064	regulation of actin polymerization or depolymerization	32/1480	166/28891	7.96138e-11	2.24705e-09	1.42794e-09	Daam2/Kirrel1/Ssh1/Capza2/Capza1/Rhoa/Add1/Cdc42ep1/Capzb/Cracd/Sptbn1/Rac1/Cyfip1/Arfgef1/Dbnl/Sptan1/Grb2/Flii/Hax1/Dbn1/Myo1c/Add3/Lima1/Rdx/Arf6/Arpc2/Tmod3/Actr3/Pfn1/Bag4/Cfl1/Dlg1	32
GO:0016311	BP	GO:0016311	dephosphorylation	48/1480	331/28891	8.04423e-11	2.25941e-09	1.43579e-09	Ptprs/Ptpra/Ptprd/Ptprm/Ptprf/Chp1/Pip4p2/Pgam5/Ppp6r1/Ssh1/Gna12/Ptprk/Ctdsp2/Ctdsp1/Ppp2r5a/Sacm1l/Mgat5/Ptpn23/Ppp6c/Ppia/Ppp2r1b/Ppp2r5c/Rngtt/Mtmr14/Ptpn11/Ppp6r3/Ptp4a1/Ptpn1/Vrk3/Ppp2r5e/Pin1/Ppm1b/Pip4p1/Ppp1cb/Ptp4a2/Ppp2r5d/Ppp1ca/Ppp1cc/Ppp1r12a/Fig4/Ppp1r8/Ctdnep1/Ppp2ca/Bag4/Mprip/Fbxw11/Tns3/Ambra1	48
GO:0070085	BP	GO:0070085	glycosylation	38/1480	225/28891	8.64485e-11	2.41638e-09	1.53554e-09	Tmem59/Chp1/Galnt1/Galnt2/Alg2/Stt3a/Gfpt1/Ddost/Galnt7/Dhdds/St3gal6/Mlec/Mgat5/Rpn1/B4galt7/Nus1/Alg5/Psen1/Arfgef1/Npc1/Galnt13/Tmtc3/Cds2/Gxylt2/Cog5/Cog1/Cog7/Dpm1/Rpn2/St6galnac4/St3gal4/Mgat4b/Cog3/Krtcap2/Cog4/Ostc/Alg3/Pomk	38
GO:0006839	BP	GO:0006839	mitochondrial transport	31/1480	158/28891	9.82024e-11	2.73173e-09	1.73594e-09	Bcap31/Samm50/Vps35/Timm23/Vdac2/Tomm40/Slc25a10/Agk/Hspa4/Srebf1/Mtx2/Mtch1/Kif5b/Tomm22/Gsk3b/Aifm1/Bag3/Bax/Timm17a/Slc25a24/Psen1/Rhot2/Mtch2/Timm29/Fis1/Rhot1/Prkaa1/Ndufa13/Hk2/Bag4/Atf2	31
GO:0098655	BP	GO:0098655	monoatomic cation transmembrane transport	85/1480	792/28891	1.01825e-10	2.81895e-09	1.79137e-09	Flna/Nedd4l/Slc12a7/Atp7a/Steap3/Atp2c1/Chp1/Atp1a1/Atp6v0d1/Atp2b1/Wwp2/Snx27/Atp1a4/Atp2a2/Slc6a6/Abcc5/Atp6v1h/Tmem168/Stom/Atp6v0a2/Asph/Atp5pd/Hvcn1/Slc4a8/Ano6/Itgb1/Slc45a2/Atp6v1a/Slc12a4/Cherp/Nedd4/Atp6v1b2/Atp1b3/Panx1/Abcb6/Kif5b/Atp6ap2/Slc12a2/Atp5f1b/Atp6v1e1/Bax/Vdac1/Hspa2/Atp5f1a/Atp5pb/Atp5po/Atp6v0a1/P2rx4/Slc30a1/Abcb7/Dnm2/Atp6v1d/Slc24a5/Arf1/Atp6v1c1/Fyn/Psen2/Ndufa4/Trpv2…	85
GO:0009150	BP	GO:0009150	purine ribonucleotide metabolic process	49/1480	345/28891	1.07776e-10	2.9695e-09	1.88703e-09	Atp7a/Far1/Ndufs1/Prps2/Adcy3/Adcy7/Atp5pd/Acsl3/Atp6v1a/Atp6v1b2/Ndufa10/Dcakd/Gpat4/Rhoa/Acsl5/Atp5f1b/Ndufa9/Vdac1/Adcy6/Ndufb10/Atp5f1a/Atp5pb/Atp5po/Ndufs3/Ndufv1/Suclg2/Fis1/Ndufs7/Map2k1/Hspa8/Pdhb/Atp5f1d/Mccc2/Ndufa13/Atp5f1c/Ndufs8/Atp5mf/Nudt5/Sdhb/Stoml2/Adsl/Ndufa12/Flcn/Ndufa6/Atp5me/Entpd7/Gtpbp1/Atp5mc1/Acadsb	49
GO:0051962	BP	GO:0051962	positive regulation of nervous system development	53/1480	391/28891	1.10246e-10	3.02314e-09	1.92112e-09	Plxna1/Plxnd1/Bmpr2/Notch2/Plxnb2/Ptpra/Ptprd/Adgrl2/Vamp7/Il6st/Ptprf/Plxna2/Met/Dct/Plxnb1/Plxna4/Cip2a/Il1rap/Kit/Itgb1/Cul7/Man2a1/Map2k2/Gsk3b/Trim32/Wls/Cyfip1/Nrp1/Prmt5/Sox10/Dbnl/Cux2/Rtn4/Trpv2/Qki/Stau2/Dbn1/Adgre5/Map2k1/Efna5/Ilk/Rheb/Clstn1/Bag1/Srrt/Actr3/Ppp1cc/Slc7a5/Ist1/Rpl4/Dag1/Vim/Rab21	53
GO:1901653	BP	GO:1901653	cellular response to peptide	49/1480	346/28891	1.19444e-10	3.25991e-09	2.07158e-09	Ptpra/Ptprf/Atp2b1/Abcc1/Gja1/Insr/Igf1r/Srebf1/Rab10/Cdk2/Gsk3b/Adcy6/Srsf3/Tyk2/Snx5/Ptpn11/Psen1/Adipor1/Rac1/Cyfip1/Fis1/Wdtc1/Fyn/Ptpn1/Raf1/Grb2/Rab8a/Myo1c/Rab31/Anxa5/Snx6/Map2k1/Gnas/Eprs1/Myo5a/Chmp5/Prkaa1/Jak1/Ahcyl1/Prkar1a/Rab13/Mapk1/Tsc2/Shc1/Vim/Sco1/H2az1/Cfl1/Uso1	49
GO:0034504	BP	GO:0034504	protein localization to nucleus	48/1480	335/28891	1.22669e-10	3.33222e-09	2.11753e-09	Flna/Chp1/Xpo1/Tnpo1/Ipo5/Ipo7/Cse1l/Tnpo3/Tnfrsf1a/Tfrc/Morc3/Pom121/Plk1/Nup188/Ipo11/Gsk3b/Ipo9/Bag3/Nup93/Tyk2/Mavs/Psen1/Fyn/Sqstm1/Larp7/Dnajb6/Pin1/Lzts2/Cdk1/Ipo8/Jak1/Eif2ak3/Kpna2/Nup107/Mapk1/Ormdl3/Kpna3/Flcn/Ctdnep1/Ubr5/Hdgf/Tsc2/Skp1/Paf1/Cfl1/Atf2/Syne1/Nup153	48
GO:0030832	BP	GO:0030832	regulation of actin filament length	32/1480	169/28891	1.29284e-10	3.49551e-09	2.2213e-09	Daam2/Kirrel1/Ssh1/Capza2/Capza1/Rhoa/Add1/Cdc42ep1/Capzb/Cracd/Sptbn1/Rac1/Cyfip1/Arfgef1/Dbnl/Sptan1/Grb2/Flii/Hax1/Dbn1/Myo1c/Add3/Lima1/Rdx/Arf6/Arpc2/Tmod3/Actr3/Pfn1/Bag4/Cfl1/Dlg1	32
GO:0006518	BP	GO:0006518	peptide metabolic process	93/1480	905/28891	1.37067e-10	3.68869e-09	2.34406e-09	Plxnb2/Bzw1/Ggt7/Adam10/Iars1/Csnk1e/Tmed10/Bace2/Npepps/Lnpep/Cpd/Eif2b1/Guf1/Gcn1/Eif4b/Atp6ap2/Farsa/Mrpl16/Magoh/Ncstn/Mrpl39/Erbb2/Dapk3/Ltn1/Psen1/Ifngr1/Cyfip1/Bzw2/Mrps23/Psen2/Cnbp/Rtn3/Rtn4/Qki/Tyms/Uqcc2/Slc35a4/Eif3h/Pdf/Mrpl4/Eprs1/Tmed2/Pin1/Rpl10a/Mrpl12/Exosc9/Rpl8/Eif2ak3/Rps27a/Rpl7a/Exosc5/H13/Eif4h/Yipf5/Mars1/Scrib/Eefsec/Ppp1ca/Rars1/Mrpl45/Nhlrc3/Exosc7/Cnot9/Drg1/Mapk1/Dap…	93
GO:0045017	BP	GO:0045017	glycerolipid biosynthetic process	37/1480	219/28891	1.50856e-10	4.04063e-09	2.56771e-09	Pi4k2b/Pi4k2a/Pgs1/Pisd/Far1/Ldlr/Tamm41/Vac14/Acsl3/Pigs/Rab38/Srebf1/Gpat4/Acsl5/Lpcat2/Pigt/Fabp5/Pign/Gnpat/Pi4ka/Pigk/Pigg/Gpaa1/Cds2/Gk/Dgke/Lpcat1/Bpnt1/Dpm1/Cdipt/Impa2/Selenoi/Pip5k1a/Pik3c3/Ctdnep1/Pigu/Cept1	37
GO:0030041	BP	GO:0030041	actin filament polymerization	32/1480	170/28891	1.51541e-10	4.04063e-09	2.56771e-09	Daam2/Kirrel1/Ssh1/Capza2/Capza1/Rhoa/Add1/Cdc42ep1/Capzb/Cracd/Sptbn1/Rac1/Cyfip1/Arfgef1/Dbnl/Sptan1/Grb2/Flii/Hax1/Dbn1/Myo1c/Add3/Rdx/Arf6/Arpc2/Arpc4/Tmod3/Actr3/Pfn1/Bag4/Cfl1/Dlg1	32
GO:0070585	BP	GO:0070585	protein localization to mitochondrion	25/1480	108/28891	1.59149e-10	4.22402e-09	2.68425e-09	Bcap31/Samm50/Rala/Timm23/Tomm40/Agk/Hspa4/Fkbp8/Srebf1/Mtch1/Tomm22/Aifm1/Bag3/Bax/Timm17a/Mavs/Mtch2/Timm29/Fis1/Prkaa1/Bag1/Dnaja1/Ndufa13/Hk2/Bag4	25
GO:0007040	BP	GO:0007040	lysosome organization	24/1480	100/28891	1.65184e-10	4.34434e-09	2.76071e-09	Gnptab/Gaa/Vps35/Slc45a2/Irgm1/Rab34/Lamtor1/Atp6ap2/Naglu/Laptm4b/Arf1/Tmem9/Clvs1/Ccdc115/Chmp5/Tmem175/Atp6v0c/Tmem106b/Tfe3/Flcn/Chmp1a/Tpp1/Cln6/Hook3	24
GO:0080171	BP	GO:0080171	lytic vacuole organization	24/1480	100/28891	1.65184e-10	4.34434e-09	2.76071e-09	Gnptab/Gaa/Vps35/Slc45a2/Irgm1/Rab34/Lamtor1/Atp6ap2/Naglu/Laptm4b/Arf1/Tmem9/Clvs1/Ccdc115/Chmp5/Tmem175/Atp6v0c/Tmem106b/Tfe3/Flcn/Chmp1a/Tpp1/Cln6/Hook3	24
GO:0030155	BP	GO:0030155	regulation of cell adhesion	88/1480	841/28891	1.74538e-10	4.53755e-09	2.88348e-09	Plxna1/Epha3/Flna/Plxnd1/Itch/Plxnb2/Ptpra/Ddr1/Myo10/Il6st/Marchf7/Erbb3/Tgfbr2/Mmp14/Slc4a2/Acvrl1/Ephb4/Plxna2/Ndfip1/Plxnb1/Plxna4/Adam10/Tfrc/Hsph1/Epha7/Lgals9/Slc7a1/Adam9/Itgb1/Adgrg1/Irgm1/Cd44/Sema6a/Rhoa/Atp5f1b/Tjp1/Rasal3/Gsk3b/Ptpn23/Flot2/Phldb2/Ass1/Tyk2/Erbb2/Dapk3/Dnm2/Ptpn11/Lgals8/Rhod/Triobp/Rac1/Nrp1/Coro2b/Rras/Sirpa/Dbn1/Map2k1/Efna5/Dnaja3/Rdx/Ilk/Arpc2/Hsd17b12/Smarcc2/M…	88
GO:0042982	BP	GO:0042982	amyloid precursor protein metabolic process	21/1480	77/28891	1.74865e-10	4.53755e-09	2.88348e-09	Itm2c/Adam10/Csnk1e/Tmed10/Bace2/Tmcc2/Adam17/Adam9/Itm2a/Naglu/Flot2/Ncstn/Soat1/Psen1/Itm2b/Ifngr1/Psen2/Rtn3/Rtn4/Pin1/Dlg1	21
GO:0009260	BP	GO:0009260	ribonucleotide biosynthetic process	36/1480	210/28891	1.74883e-10	4.53755e-09	2.88348e-09	Ndufs1/Prps2/Adcy3/Adcy7/Atp5pd/Umps/Ndufa10/Dcakd/Acsl5/Atp5f1b/Ndufa9/Vdac1/Adcy6/Ndufb10/Atp5f1a/Atp5pb/Atp5po/Ctps1/Ndufs3/Ndufv1/Ndufs7/Map2k1/Pdhb/Atp5f1d/Ndufa13/Atp5f1c/Ndufs8/Atp5mf/Sdhb/Stoml2/Adsl/Ndufa12/Flcn/Ndufa6/Atp5me/Atp5mc1	36
GO:0006612	BP	GO:0006612	protein targeting to membrane	27/1480	126/28891	1.95512e-10	5.05014e-09	3.20923e-09	Vamp7/Sec63/Zdhhc20/Stom/Zdhhc15/Vps37b/Rab8b/Erbb2/Sec61a1/Fis1/Fyn/Srprb/Golga7/Myo1c/Arl6ip1/Arpc2/Get3/Gm10320/Sec61b/Exoc4/Sec62/Zdhhc9/Actr3/Cib1/Ssr3/Srp68/Pard3	27
GO:0016032	BP	GO:0016032	viral process	47/1480	329/28891	2.11516e-10	5.43925e-09	3.45649e-09	Slc3a2/Zdhhc20/Ifitm3/Stom/Ifitm2/Insr/Snx3/Tyro3/Nedd4/Pdcd6ip/Tsg101/Nectin3/Ppia/Vps37b/Trim32/Mavs/Nrp1/Mvb12a/Trim59/Npc1/Vapb/Larp7/Hspa8/Vps4b/Chmp5/Tfap4/Pcbp1/Srpk1/Stat1/Trim27/Bsg/Kpna2/Trim21/Zdhhc9/Ist1/Ctsb/Tarbp2/Pfn1/Pik3c3/Ppie/Fbxl2/Chmp1a/Tpcn1/Vps4a/Smarcb1/Hacd3/Cfl1	47
GO:0009201	BP	GO:0009201	ribonucleoside triphosphate biosynthetic process	26/1480	118/28891	2.20659e-10	5.64925e-09	3.58994e-09	Ndufs1/Atp5pd/Ndufa10/Atp5f1b/Ndufa9/Ndufb10/Atp5f1a/Atp5pb/Atp5po/Ctps1/Ndufs3/Ndufv1/Ndufs7/Map2k1/Atp5f1d/Ndufa13/Atp5f1c/Ndufs8/Atp5mf/Sdhb/Stoml2/Ndufa12/Flcn/Ndufa6/Atp5me/Atp5mc1	26
GO:0008361	BP	GO:0008361	regulation of cell size	37/1480	222/28891	2.25115e-10	5.73796e-09	3.64631e-09	Bmpr2/Slc12a7/Ptprs/Atp7a/Lrrc8a/Plxna4/Slc12a9/Epha7/Ano6/Slc12a4/Sema4c/Sema6a/Rhoa/Add1/Slc12a2/Gsk3b/Clns1a/Ryk/Dnm2/Rac1/Cyfip1/Wdtc1/Nrp1/Dbnl/Rtn4/Trpv2/Dbn1/Stk39/Efna5/Rdx/Ilk/Actr3/Ist1/Rpl4/Tsc2/Rab21/Cfl1	37
GO:0048278	BP	GO:0048278	vesicle docking	19/1480	64/28891	2.58567e-10	6.5617e-09	4.16978e-09	Stx12/Stx6/Stxbp2/Stxbp3/Stx7/Ralb/Stx8/Stxbp1/Stx2/Rab8b/Rab8a/Exoc1/Stx16/Exoc4/Rab13/Exoc8/Exoc2/Stx11/Uso1	19
GO:0031401	BP	GO:0031401	positive regulation of protein modification process	95/1480	945/28891	2.79843e-10	7.07062e-09	4.49318e-09	Ubb/Bmpr2/Notch2/Ddr2/Stub1/Il6st/Marchf7/Erbb3/Acvr2a/Chp1/Acvr1/Met/Arrdc3/Ndfip1/Tnfrsf1a/Hspbp1/Tfrc/Kit/Ralb/Eng/Epha7/Insr/Adam17/Gna12/Pdgfra/Adam9/Itgb1/Plk1/Irgm1/Tollip/Wbp1l/Cd44/Rhoa/Ppp2r5a/Vangl2/Rap2b/Map2k2/Gsk3b/Tab1/Ppia/Hspa2/Cul3/Mob2/Mavs/Erbb2/Ptpn11/Psen1/Ehd4/Rac1/Nrp1/Fyn/Ptpn1/Raf1/Wdfy2/Rap2c/Sf3b1/Lrp4/Hax1/Myo1c/Sqstm1/Vrk3/Rap2a/Map2k1/Efna5/Gnas/Yes1/Dnaja3/Pin1/Ilk…	95
GO:0016188	BP	GO:0016188	synaptic vesicle maturation	13/1480	28/28891	2.88939e-10	7.23724e-09	4.59907e-09	Atp6v0d1/Zdhhc20/Atp6v1h/Stxbp1/Atp6v1a/Atp6v1b2/Zdhhc15/Atp6ap2/Atp6v1e1/Atp6v0a1/Atp6v1d/Atp6v1c1/Atp6v1g1	13
GO:0036010	BP	GO:0036010	protein localization to endosome	13/1480	28/28891	2.88939e-10	7.23724e-09	4.59907e-09	Tmem30a/Vps35/Ezr/Ankrd13a/Tollip/Rab35/Abhd17b/Nrp1/Abhd17c/Abhd17a/Rdx/Arf6/Scrib	13
GO:1901652	BP	GO:1901652	response to peptide	58/1480	464/28891	3.68122e-10	9.18083e-09	5.83416e-09	Ptpra/Ptprf/Atp2b1/Stxbp3/Erbin/Abcc1/Atp2a2/Gja1/Insr/Igf1r/Sort1/Srsf5/Srebf1/Eif2b1/Rab10/Cdk2/Gsk3b/Adcy6/Srsf3/Tyk2/Snx5/Ptpn11/Psen1/Adipor1/Rac1/Cyfip1/Fis1/Wdtc1/Fyn/Ptpn1/Raf1/Grb2/Rab8a/Myo1c/Rab31/Anxa5/Snx6/Map2k1/Gnas/Eprs1/Myo5a/Chmp5/Prkaa1/Stat1/Jak1/Ahcyl1/Prkar1a/Rab13/Mapk1/Tsc2/Shc1/Vim/Sco1/H2az1/Eif6/Cfl1/Uso1/Scly	58
GO:0007409	BP	GO:0007409	axonogenesis	61/1480	501/28891	3.73395e-10	9.27237e-09	5.89233e-09	Tubb2b/Plxna1/Epha3/Unc5c/Plxnd1/Bmpr2/Nrp2/Plxnb2/Ptprs/Ptprm/Plxna2/Plxnb1/Plxna4/Aplp2/Neo1/Epha7/Adam17/Itgb1/Igf1r/Stxbp1/Sema4c/Unc5b/Rab10/Sema6a/Kif5b/Vangl2/Map2k2/Gsk3b/Ryk/Erbb2/Lgr4/Dnm2/Ptpn11/Psen1/Boc/Ablim1/Rac1/Cyfip1/Nrp1/Dbnl/Sipa1l1/Rtn4/Trpv2/Rab8a/Lrp4/Dbn1/Map2k1/Efna5/Ilk/Bsg/Actbl2/Myh10/Actr3/Ist1/Rpl4/Afg3l2/Tsc2/Dag1/Vim/Rab21/Atl1	61
GO:0050684	BP	GO:0050684	regulation of mRNA processing	28/1480	139/28891	4.14205e-10	1.02418e-08	6.5084e-09	Srsf9/Tra2b/Srsf6/Celf2/Srsf10/Srrm1/Tra2a/Clns1a/Magoh/Srsf3/Thrap3/Rbm10/Prmt5/Rbm5/Qki/Larp7/Hspa8/Rbm25/Wtap/Srpk1/Wdr77/Sfswap/Ahcyl1/Rbfox2/Ythdc1/Sf3b4/Paf1/Cdc73	28
GO:0032984	BP	GO:0032984	protein-containing complex disassembly	39/1480	248/28891	4.3344e-10	1.06719e-08	6.78166e-09	Ssrp1/Atp2a2/Napa/Asph/Insr/Igf1r/Setx/Capza2/Irgm1/Capza1/Kif5b/Rhoa/Add1/Gsk3b/Capzb/Tom1/Cracd/Sptbn1/Sptan1/Flii/Add3/Lima1/Hspa8/Rdx/Vps4b/Chmp5/Arpc2/Smarcc2/Tmod3/Lamp2/Cib1/Pik3c3/Chmp1a/Eif5a/Vps4a/Smarcb1/Nes/Cfl1/Gak	39
GO:0009206	BP	GO:0009206	purine ribonucleoside triphosphate biosynthetic process	25/1480	113/28891	4.45335e-10	1.09182e-08	6.93824e-09	Ndufs1/Atp5pd/Ndufa10/Atp5f1b/Ndufa9/Ndufb10/Atp5f1a/Atp5pb/Atp5po/Ndufs3/Ndufv1/Ndufs7/Map2k1/Atp5f1d/Ndufa13/Atp5f1c/Ndufs8/Atp5mf/Sdhb/Stoml2/Ndufa12/Flcn/Ndufa6/Atp5me/Atp5mc1	25
GO:0046474	BP	GO:0046474	glycerophospholipid biosynthetic process	31/1480	168/28891	4.89532e-10	1.19512e-08	7.59464e-09	Pi4k2b/Pi4k2a/Pgs1/Pisd/Far1/Tamm41/Vac14/Acsl3/Pigs/Rab38/Gpat4/Lpcat2/Pigt/Fabp5/Pign/Pi4ka/Pigk/Pigg/Gpaa1/Cds2/Dgke/Lpcat1/Bpnt1/Dpm1/Cdipt/Impa2/Selenoi/Pip5k1a/Pik3c3/Pigu/Cept1	31
GO:0051258	BP	GO:0051258	protein polymerization	42/1480	282/28891	5.26284e-10	1.27945e-08	8.13052e-09	Daam2/Kirrel1/Met/Ssh1/Vdac2/Capza2/Capza1/Rhoa/Tbcd/Add1/Cdc42ep1/Capzb/Trim32/Slain2/Cracd/Sptbn1/Rac1/Cyfip1/Arfgef1/Dbnl/Sptan1/Grb2/Flii/Hax1/Dbn1/Myo1c/Add3/Rdx/Arf6/Arpc2/Arpc4/Orc4/Tmod3/Actr3/Drg1/Pfn1/Bag4/Septin2/Cfl1/Tubgcp2/Dlg1/Ambra1	42
GO:0009152	BP	GO:0009152	purine ribonucleotide biosynthetic process	34/1480	198/28891	5.32082e-10	1.28813e-08	8.18569e-09	Ndufs1/Prps2/Adcy3/Adcy7/Atp5pd/Ndufa10/Dcakd/Acsl5/Atp5f1b/Ndufa9/Vdac1/Adcy6/Ndufb10/Atp5f1a/Atp5pb/Atp5po/Ndufs3/Ndufv1/Ndufs7/Map2k1/Pdhb/Atp5f1d/Ndufa13/Atp5f1c/Ndufs8/Atp5mf/Sdhb/Stoml2/Adsl/Ndufa12/Flcn/Ndufa6/Atp5me/Atp5mc1	34
GO:0009145	BP	GO:0009145	purine nucleoside triphosphate biosynthetic process	25/1480	114/28891	5.42918e-10	1.30889e-08	8.3176e-09	Ndufs1/Atp5pd/Ndufa10/Atp5f1b/Ndufa9/Ndufb10/Atp5f1a/Atp5pb/Atp5po/Ndufs3/Ndufv1/Ndufs7/Map2k1/Atp5f1d/Ndufa13/Atp5f1c/Ndufs8/Atp5mf/Sdhb/Stoml2/Ndufa12/Flcn/Ndufa6/Atp5me/Atp5mc1	25
GO:0006885	BP	GO:0006885	regulation of pH	24/1480	106/28891	5.9837e-10	1.43658e-08	9.12909e-09	Slc4a2/Chp1/Slc4a7/Atp6v0d1/Atp1a4/Atp6v0a2/Hvcn1/Slc4a8/Tm9sf4/Slc45a2/Rab38/Atp6v1b2/Atp6ap2/Atp5f1b/Atp6v0a1/Tmem9/Ccdc115/Tmem175/Tcirg1/Atp6v0c/Tmem106b/Slc9a8/Mapk1/Cln6	24
GO:0006486	BP	GO:0006486	protein glycosylation	34/1480	199/28891	6.1059e-10	1.45386e-08	9.23886e-09	Tmem59/Chp1/Galnt1/Galnt2/Alg2/Stt3a/Gfpt1/Ddost/Galnt7/Dhdds/St3gal6/Mlec/Mgat5/Rpn1/B4galt7/Nus1/Alg5/Psen1/Arfgef1/Npc1/Galnt13/Tmtc3/Gxylt2/Cog7/Dpm1/Rpn2/St6galnac4/St3gal4/Mgat4b/Cog3/Krtcap2/Ostc/Alg3/Pomk	34
GO:0043413	BP	GO:0043413	macromolecule glycosylation	34/1480	199/28891	6.1059e-10	1.45386e-08	9.23886e-09	Tmem59/Chp1/Galnt1/Galnt2/Alg2/Stt3a/Gfpt1/Ddost/Galnt7/Dhdds/St3gal6/Mlec/Mgat5/Rpn1/B4galt7/Nus1/Alg5/Psen1/Arfgef1/Npc1/Galnt13/Tmtc3/Gxylt2/Cog7/Dpm1/Rpn2/St6galnac4/St3gal4/Mgat4b/Cog3/Krtcap2/Ostc/Alg3/Pomk	34
GO:0006893	BP	GO:0006893	Golgi to plasma membrane transport	18/1480	60/28891	6.30779e-10	1.49577e-08	9.50522e-09	Vamp7/Atp2c1/Acsl3/Rab34/Rab10/Dnm2/Vamp3/Sptbn1/Gga2/Golga7/Rab31/Exoc1/Vamp4/Exoc4/Exoc8/Exoc2/Vamp5/Golph3	18
GO:0010562	BP	GO:0010562	positive regulation of phosphorus metabolic process	89/1480	877/28891	6.49629e-10	1.52795e-08	9.70969e-09	Bmpr2/Notch2/Ddr2/Ddr1/Il6st/Erbb3/Acvr2a/Sdcbp/Chp1/Ephb4/Acvr1/Met/Tnfrsf1a/Tfrc/Kit/Ralb/Eng/Epha7/Insr/Adam17/Acsl3/Tyro3/Gna12/Pdgfra/Adam9/Itgb1/Igf1r/Plk1/Irgm1/Rab38/Cd44/Rhoa/Ppp2r5a/Vangl2/Rap2b/Map2k2/Gsk3b/Tab1/Ppia/Hspa2/Ryk/Mob2/Mavs/Erbb2/Ptpn11/Psen1/Ehd4/Rac1/Nrp1/Fyn/Ptpn1/Raf1/Wdfy2/Rap2c/Lrp4/Hax1/Sqstm1/Vrk3/Rap2a/Map2k1/Efna5/Gnas/Yes1/Pin1/Ilk/Dstyk/Map2k7/Fzd7/Ppp2r5d/Cib1…	89
GO:0045937	BP	GO:0045937	positive regulation of phosphate metabolic process	89/1480	877/28891	6.49629e-10	1.52795e-08	9.70969e-09	Bmpr2/Notch2/Ddr2/Ddr1/Il6st/Erbb3/Acvr2a/Sdcbp/Chp1/Ephb4/Acvr1/Met/Tnfrsf1a/Tfrc/Kit/Ralb/Eng/Epha7/Insr/Adam17/Acsl3/Tyro3/Gna12/Pdgfra/Adam9/Itgb1/Igf1r/Plk1/Irgm1/Rab38/Cd44/Rhoa/Ppp2r5a/Vangl2/Rap2b/Map2k2/Gsk3b/Tab1/Ppia/Hspa2/Ryk/Mob2/Mavs/Erbb2/Ptpn11/Psen1/Ehd4/Rac1/Nrp1/Fyn/Ptpn1/Raf1/Wdfy2/Rap2c/Lrp4/Hax1/Sqstm1/Vrk3/Rap2a/Map2k1/Efna5/Gnas/Yes1/Pin1/Ilk/Dstyk/Map2k7/Fzd7/Ppp2r5d/Cib1…	89
GO:0009142	BP	GO:0009142	nucleoside triphosphate biosynthetic process	26/1480	124/28891	6.95637e-10	1.62954e-08	1.03553e-08	Ndufs1/Atp5pd/Ndufa10/Atp5f1b/Ndufa9/Ndufb10/Atp5f1a/Atp5pb/Atp5po/Ctps1/Ndufs3/Ndufv1/Ndufs7/Map2k1/Atp5f1d/Ndufa13/Atp5f1c/Ndufs8/Atp5mf/Sdhb/Stoml2/Ndufa12/Flcn/Ndufa6/Atp5me/Atp5mc1	26
GO:0040008	BP	GO:0040008	regulation of growth	75/1480	691/28891	7.89731e-10	1.84249e-08	1.17085e-08	Bmpr2/Nedd4l/Ptprs/Ddr1/Tgfbr2/Mmp14/Acvrl1/Sdcbp/Syt4/Bmpr1a/Tgfbr1/Atrn/Plxna4/Adam10/Gja1/Ezr/Dcbld2/Epha7/Insr/Adam17/Sh3pxd2b/Igf1r/Acvr1b/Sema4c/Tsg101/Klhl22/Cd44/Sema6a/Gpat4/Rhoa/Lamtor1/Gsk3b/Ryk/Trim32/Erbb2/Dnm2/Ndufs3/Rbm10/Adipor1/Cyfip1/Nrp1/Dbnl/Plaa/Rtn4/Trpv2/Dbn1/Efna5/Gnas/Pin1/Ilk/Ccnb2/Clstn1/Exosc9/Cdk1/Smad7/Slc23a2/Actr3/Idh3g/Ndufa13/Cib1/Ist1/Mapk1/Rpl4/Afg3l2/Suv39h1/A…	75
GO:0048066	BP	GO:0048066	developmental pigmentation	17/1480	54/28891	8.14606e-10	1.8929e-08	1.20288e-08	Tyrp1/Dct/Kit/Mreg/Slc45a2/Rab38/Atp6ap2/Bax/Gna11/Gnaq/Slc24a5/Rab32/Sox10/Mitf/Ap1m1/Myo5a/Pax3	17
GO:0030162	BP	GO:0030162	regulation of proteolysis	81/1480	773/28891	8.80365e-10	2.03752e-08	1.29478e-08	Ubb/Hspa1b/Itch/Stub1/Bcap31/Marchf7/Mmp14/Xpo1/Rnf19a/Csnk1e/Tmed10/Hspbp1/Tmem168/Timm23/Asph/Bag5/Epha7/Ankib1/Gna12/Adam9/Ldlrad3/Plk1/Rnf144a/Rnf19b/Mtch1/Rhobtb3/Cd44/Rhoa/Antxr1/Prkacb/Snx12/Gsk3b/Aifm1/Bax/Timm17a/Ncstn/Bag2/Trim32/Nle1/Psen1/Mtch2/Lrig2/Fis1/Fyn/Psen2/Rffl/Psma3/Tmtc3/Eif3h/Usp5/Dnajb6/Dnaja3/Arl6ip1/Tfap4/Pdcd2/Psme3/Snx33/Stat1/Serpinb6a/Itih3/Eif2ak3/Trim21/Usp7/Ndufa…	81
GO:0030100	BP	GO:0030100	regulation of endocytosis	47/1480	344/28891	9.52631e-10	2.19598e-08	1.39549e-08	Epha3/Nedd4l/Sdcbp/Pip4p2/Arhgap21/Syt4/Syt11/Ankfy1/Mib1/Rala/Ankrd13a/Vac14/Insr/Snx3/Ano6/Lman2/Itgb1/Nedd4/Tsg101/Rab5c/Add1/Snx12/Vps28/Dnm2/Atad1/Ehd4/Arf1/Letmd1/Ptpn1/Scyl2/Sirpa/Rab5b/Rab31/Myo18a/Snx33/Lyar/Vamp4/Scrib/Rap1a/Ighg1/Myh9/Pacsin3/Mertk/Tsc2/Dab2/Rab21/Pard3	47
GO:1905039	BP	GO:1905039	carboxylic acid transmembrane transport	28/1480	144/28891	9.69583e-10	2.22619e-08	1.41468e-08	Abcb1b/Slc3a2/Lrrc8a/Abcc1/Slc6a6/Abcc5/Slc38a2/Sfxn1/Slc25a10/Slc7a1/Itgb1/Lrrc8d/Acsl5/Slc25a1/Slc25a32/Slc38a1/Lrrc8c/Slc16a1/Slc1a5/Psen1/Slc25a11/Slc15a4/Arl6ip1/Sfxn3/Slc23a2/Abcd3/Slc7a5/Septin2	28
GO:0006403	BP	GO:0006403	RNA localization	31/1480	173/28891	1.03834e-09	2.37464e-08	1.50902e-08	Tgfbr2/Xpo1/Nup210/Pom121/Aaas/Xpo5/Nup188/Xpot/Ndc1/Magoh/Magohb/Nup93/Srsf3/Cct4/Qki/Stau2/Fbl/Ncbp3/Rae1/Phax/Thoc2/Nup107/Thoc6/Nup43/Nup37/Hnrnpa3/Cetn2/Ythdc1/Ddx19a/Thoc3/Nup153	31
GO:0050657	BP	GO:0050657	nucleic acid transport	28/1480	145/28891	1.14354e-09	2.58457e-08	1.64242e-08	Tgfbr2/Xpo1/Nup210/Pom121/Aaas/Xpo5/Nup188/Xpot/Ndc1/Magoh/Magohb/Nup93/Srsf3/Qki/Ncbp3/Rae1/Phax/Thoc2/Nup107/Thoc6/Nup43/Nup37/Hnrnpa3/Cetn2/Ythdc1/Ddx19a/Thoc3/Nup153	28
GO:0050658	BP	GO:0050658	RNA transport	28/1480	145/28891	1.14354e-09	2.58457e-08	1.64242e-08	Tgfbr2/Xpo1/Nup210/Pom121/Aaas/Xpo5/Nup188/Xpot/Ndc1/Magoh/Magohb/Nup93/Srsf3/Qki/Ncbp3/Rae1/Phax/Thoc2/Nup107/Thoc6/Nup43/Nup37/Hnrnpa3/Cetn2/Ythdc1/Ddx19a/Thoc3/Nup153	28
GO:1903825	BP	GO:1903825	organic acid transmembrane transport	28/1480	145/28891	1.14354e-09	2.58457e-08	1.64242e-08	Abcb1b/Slc3a2/Lrrc8a/Abcc1/Slc6a6/Abcc5/Slc38a2/Sfxn1/Slc25a10/Slc7a1/Itgb1/Lrrc8d/Acsl5/Slc25a1/Slc25a32/Slc38a1/Lrrc8c/Slc16a1/Slc1a5/Psen1/Slc25a11/Slc15a4/Arl6ip1/Sfxn3/Slc23a2/Abcd3/Slc7a5/Septin2	28
GO:1903530	BP	GO:1903530	regulation of secretion by cell	75/1480	699/28891	1.31971e-09	2.97113e-08	1.88807e-08	Hgs/Vamp7/Acvr2a/Sdcbp/Stxbp2/Stam/Stxbp3/Syt4/Syt11/Atp2a2/Tnfrsf1a/Gja1/Tmed10/Vps35/Rala/Neo1/Lrp5/Slc38a2/Slc4a8/Lgals9/Adam9/Stxbp1/Srebf1/Pdcd6ip/Tsg101/Tm7sf3/Rab34/Kif5b/Rab5a/Slc12a2/Ptpn23/Gna11/Ppia/Tmem132a/Slc30a1/Pnkd/Rab8b/Wls/Vamp3/Gnaq/Slc16a1/Ptpn11/Arf1/Rac1/Rtn4/Rhot1/Rab8a/Uqcc2/Psmd9/Anxa5/Efna5/Gnas/Myo5a/Myo18a/Vps4b/Arf6/Tcirg1/Bsg/Myh10/Prkar1a/Rab13/Rap1a/Hmox1/Exoc2/My…	75
GO:0071786	BP	GO:0071786	endoplasmic reticulum tubular network organization	11/1480	21/28891	1.3474e-09	3.02173e-08	1.92022e-08	Retreg3/Rab10/Rab18/Tmem33/Rtn3/Rtn4/Arl6ip1/Use1/Atl2/Atl3/Atl1	11
GO:0007507	BP	GO:0007507	heart development	73/1480	673/28891	1.36828e-09	3.04496e-08	1.93499e-08	Epha3/Flna/Plxnd1/Bmpr2/Notch2/Nrp2/Erbb3/Tgfbr2/Acvrl1/Ephb4/Acvr1/Met/Bmpr1a/Tgfbr1/Plxna4/Spred1/Gaa/Mib1/Tnfrsf1a/Gja1/Eng/Insr/Sh3pxd2b/Pdgfra/Pds5a/Itgb1/Acvr1b/Nedd4/Snx17/Rhoa/Adamts1/Vangl2/Map2k2/Gsk3b/Naglu/Tab1/Gna11/Acvr2b/Luzp1/Erbb2/Dnm2/Gnaq/Rbm10/Pdlim7/Ptpn11/Psen1/Frs2/Rac1/Nrp1/Rtn4/Fkbp1a/Map2k1/Tmed2/Pin1/Ilk/Cdk1/Acadm/Smad7/Myh10/Kdm2a/Fzd7/Prkar1a/Mapk1/Plec/Tsc2/Dag1/Shc…	73
GO:0048514	BP	GO:0048514	blood vessel morphogenesis	73/1480	673/28891	1.36828e-09	3.04496e-08	1.93499e-08	Flna/Plxnd1/Bmpr2/Notch2/Nrp2/Hgs/Tgfbr2/Ptprm/Acvrl1/Ephb4/Acvr1/Apold1/Bmpr1a/Tgfbr1/Spred1/Tnfrsf1a/Gja1/Ldlr/Eng/Lrp5/Gna13/Pdgfra/Itgb1/Adgrg1/Nedd4/Cul7/Unc5b/Sema6a/Rhoa/Adamts1/Vangl2/Add1/Slc12a2/Atp5f1b/Tjp1/Naglu/Bax/Nus1/Rhoj/Mcam/Rhob/Cald1/Apob/Nrp1/Rras/Rtn4/Ackr3/Qki/Rnh1/Vps4b/Pgk1/Stat1/Bsg/Smad7/Nr2f2/Jak1/Eif2ak3/Tlr3/Hk2/Cib1/Rap1a/Hmox1/Sparc/Myo1e/Myh9/Flcn/Amotl1/Pdcd6/Spr…	73
GO:0051168	BP	GO:0051168	nuclear export	31/1480	175/28891	1.3903e-09	3.08209e-08	1.95859e-08	Chp1/Xpo1/Cse1l/Pom121/Xpo5/Nup188/Xpot/Gsk3b/Bag3/Magoh/Magohb/Nup93/Srsf3/Rbm10/Xpo7/Ptpn11/Nop9/Xpo4/Ncbp3/Rae1/Phax/Emd/Ahcyl1/Thoc2/Nup107/Thoc6/Ythdc1/Ddx19a/Thoc3/Eif6/Nup153	31
GO:0043604	BP	GO:0043604	amide biosynthetic process	90/1480	906/28891	1.51407e-09	3.34367e-08	2.12481e-08	Plxnb2/Bzw1/Ggt7/Smpd4/Cers2/Sptlc1/Iars1/Ugcg/Agk/Eif2b1/Guf1/Gcn1/Eif4b/Acsl5/Farsa/Mrpl16/Vdac1/Magoh/Ass1/Mrpl39/Erbb2/Dapk3/Ltn1/Sptlc2/Cyfip1/Bzw2/Mrps23/Cnbp/Qki/Tyms/Uqcc2/Cers5/Smpd2/Slc35a4/Eif3h/Pdf/Mrpl4/Eprs1/Tmed2/Pdhb/Rpl10a/Mrpl12/Exosc9/Rpl8/Eif2ak3/Rps27a/Rpl7a/Exosc5/Eif4h/St6galnac4/Mars1/Scrib/Eefsec/Ppp1ca/Rars1/Mrpl45/Nhlrc3/Exosc7/Cnot9/Drg1/Mapk1/Dap3/Rps21/Ormdl3/Mrpl10/…	90
GO:0007006	BP	GO:0007006	mitochondrial membrane organization	24/1480	111/28891	1.62157e-09	3.56746e-08	2.26702e-08	Samm50/Chchd6/Vdac2/Tomm40/Agk/Hspa4/Chchd3/Mtch1/Immt/Tomm22/Gsk3b/Bax/Micos13/Dnajc11/Rhot2/Mtch2/Timm29/Rhot1/Afg3l1/Ndufa13/Hk2/Afg3l2/Adck1/Atf2	24
GO:1903076	BP	GO:1903076	regulation of protein localization to plasma membrane	25/1480	120/28891	1.69634e-09	3.71782e-08	2.36257e-08	Epha3/Tmem59/Mmp14/Atp2c1/Stx7/Ezr/Acsl3/Itgb1/Stx8/Kif5b/Ppp2r5a/Sptbn1/Rer1/Vti1b/Pgrmc1/Sqstm1/Myo5a/Tmed2/Arf6/Vamp4/Actr3/Cib1/Vps4a/Dab2/Dlg1	25
GO:0009306	BP	GO:0009306	protein secretion	54/1480	434/28891	1.75109e-09	3.82332e-08	2.42961e-08	Steap3/Gnptab/Stxbp3/Syt4/Preb/Gja1/Tmed10/Vps35/Neo1/Lrp5/Slc4a8/Adam9/Srebf1/Tm7sf3/Rab34/Kif5b/Slc12a2/M6pr/Ptpn23/Gna11/Ppia/Tmem132a/Acvr2b/Rab8b/Wls/Gnaq/Slc16a1/Ptpn11/Arf1/Rac1/Raf1/Copg1/Rab8a/Uqcc2/Psmd9/Anxa5/Efna5/Gnas/Myo5a/Myo18a/Tmed2/Arf6/Tcirg1/Copg2/Bsg/Myh10/Prkar1a/Rab13/Myh9/Map4k4/Ttn/Frmd4a/Tvp23b/Golph3	54
GO:0001558	BP	GO:0001558	regulation of cell growth	56/1480	459/28891	1.81567e-09	3.94942e-08	2.50975e-08	Bmpr2/Nedd4l/Ptprs/Ddr1/Mmp14/Acvrl1/Sdcbp/Syt4/Tgfbr1/Plxna4/Adam10/Gja1/Dcbld2/Epha7/Adam17/Acvr1b/Sema4c/Tsg101/Klhl22/Cd44/Sema6a/Rhoa/Lamtor1/Gsk3b/Ryk/Trim32/Erbb2/Dnm2/Ndufs3/Rbm10/Adipor1/Cyfip1/Nrp1/Dbnl/Plaa/Rtn4/Trpv2/Dbn1/Efna5/Pin1/Ilk/Clstn1/Exosc9/Smad7/Slc23a2/Actr3/Ndufa13/Cib1/Ist1/Rpl4/G6pdx/Smarcb1/Dab2/Rab21/Cdc73/Cfl1	56
GO:0008154	BP	GO:0008154	actin polymerization or depolymerization	33/1480	197/28891	1.82938e-09	3.96434e-08	2.51923e-08	Daam2/Kirrel1/Ssh1/Capza2/Capza1/Rhoa/Add1/Cdc42ep1/Capzb/Cracd/Sptbn1/Rac1/Cyfip1/Arfgef1/Dbnl/Sptan1/Grb2/Flii/Hax1/Dbn1/Myo1c/Add3/Lima1/Rdx/Arf6/Arpc2/Arpc4/Tmod3/Actr3/Pfn1/Bag4/Cfl1/Dlg1	33
GO:0051236	BP	GO:0051236	establishment of RNA localization	28/1480	148/28891	1.85792e-09	4.01116e-08	2.54898e-08	Tgfbr2/Xpo1/Nup210/Pom121/Aaas/Xpo5/Nup188/Xpot/Ndc1/Magoh/Magohb/Nup93/Srsf3/Qki/Ncbp3/Rae1/Phax/Thoc2/Nup107/Thoc6/Nup43/Nup37/Hnrnpa3/Cetn2/Ythdc1/Ddx19a/Thoc3/Nup153	28
GO:0035592	BP	GO:0035592	establishment of protein localization to extracellular region	54/1480	435/28891	1.9019e-09	4.09086e-08	2.59963e-08	Steap3/Gnptab/Stxbp3/Syt4/Preb/Gja1/Tmed10/Vps35/Neo1/Lrp5/Slc4a8/Adam9/Srebf1/Tm7sf3/Rab34/Kif5b/Slc12a2/M6pr/Ptpn23/Gna11/Ppia/Tmem132a/Acvr2b/Rab8b/Wls/Gnaq/Slc16a1/Ptpn11/Arf1/Rac1/Raf1/Copg1/Rab8a/Uqcc2/Psmd9/Anxa5/Efna5/Gnas/Myo5a/Myo18a/Tmed2/Arf6/Tcirg1/Copg2/Bsg/Myh10/Prkar1a/Rab13/Myh9/Map4k4/Ttn/Frmd4a/Tvp23b/Golph3	54
GO:0019058	BP	GO:0019058	viral life cycle	38/1480	250/28891	1.93518e-09	4.14703e-08	2.63532e-08	Slc3a2/Ifitm3/Stom/Ifitm2/Insr/Snx3/Tyro3/Nedd4/Pdcd6ip/Tsg101/Nectin3/Ppia/Vps37b/Mavs/Nrp1/Mvb12a/Trim59/Npc1/Vapb/Hspa8/Vps4b/Chmp5/Pcbp1/Srpk1/Bsg/Kpna2/Trim21/Ist1/Ctsb/Tarbp2/Pik3c3/Ppie/Fbxl2/Chmp1a/Tpcn1/Vps4a/Smarcb1/Hacd3	38
GO:0099175	BP	GO:0099175	regulation of postsynapse organization	27/1480	139/28891	1.96789e-09	4.20155e-08	2.66997e-08	Nrp2/Ptprs/Ptprd/Ptprf/Adam10/Il1rap/Vps35/Epha7/Arf4/Zdhhc15/Abhd17b/Psen1/Fyn/Abhd17c/Psen2/Dbnl/Sipa1l1/Cux2/Stau2/Abhd17a/Dbn1/Hspa8/Rheb/Actr3/Lzts3/Tsc2/Cfl1	27
GO:0031400	BP	GO:0031400	negative regulation of protein modification process	57/1480	473/28891	2.06185e-09	4.38598e-08	2.78717e-08	Marchf7/Kirrel1/Chp1/Met/Spred1/Eng/Bag5/Insr/Hspa4/Ctdspl/Plk1/Fkbp8/Tsg101/Ctdsp2/Ivns1abp/Ctdsp1/Mgat5/Gsk3b/Bax/Ppia/Vps28/Bag2/Gnaq/Psen1/Fyn/Ptpn1/Psen2/Plaa/Sirpa/Sqstm1/Spred2/Dnaja3/Tmed2/Ilk/Prkaa1/Tfap4/Trim27/Bag1/Usp4/Stk38/Dnaja1/Smad7/Nr2f2/Trim21/Ppp2r5d/Prkar1a/Cib1/Gnl3l/Plec/Ppp1r8/Flcn/Tsc2/Spry2/G6pdx/Mprip/Cnksr3/Pard3	57
GO:1901873	BP	GO:1901873	regulation of post-translational protein modification	42/1480	295/28891	2.12104e-09	4.49536e-08	2.85668e-08	Ubb/Itch/Stub1/Marchf7/Chp1/Arrdc3/Ndfip1/Tgfbr1/Hspbp1/Bag5/Plk1/Tollip/Ivns1abp/Wbp1l/Gsk3b/Ppia/Vps28/Cul3/Bag2/Psen1/Fyn/Psen2/Plaa/Sf3b1/Myo1c/Sqstm1/Dnaja3/Pin1/Ehmt1/Usp4/Dnaja1/Smad7/Trim21/Dek/Gnl3l/Sae1/Flcn/Suv39h1/Pdcd6/Spry2/Skp1/Nelfe	42
GO:0031329	BP	GO:0031329	regulation of cellular catabolic process	68/1480	614/28891	2.14265e-09	4.5246e-08	2.87526e-08	Itch/Tmem59/Scfd1/Sptlc1/Ralb/Ldlr/Insr/Adam9/Irgm1/Fkbp8/Srebf1/Klhl22/Acsl5/Sec22b/Gsk3b/Aifm1/Bag3/Bax/Tom1/Vdac1/Stk38l/Magoh/Trim32/Atp6v0a1/Thrap3/Rbm10/Psen1/Sptlc2/Lrig2/Ptpn1/Daglb/Qki/Rab8a/Npc1/Sqstm1/Rragc/Map2k1/Prkaa1/Snx33/Trim27/Exosc9/Phax/Taf15/Trim21/Exosc5/Cisd1/Fus/Rraga/Slc7a5/Exosc7/Hmox1/Soga3/Tbrg4/Ormdl3/Pacsin3/Usp30/Cisd2/Pik3c3/Flcn/Fbxl2/Ppp2ca/Idh1/Tsc2/Tpcn1/Vim/Gt…	68
GO:0045022	BP	GO:0045022	early endosome to late endosome transport	15/1480	44/28891	2.30402e-09	4.84766e-08	3.08056e-08	Flna/Ezr/Snx3/Stx8/Rab5a/Map2k2/Snx12/Ptpn23/Map2k1/Rdx/Mapk1/Pik3c3/Dab2/Rab21/Hook3	15
GO:0071346	BP	GO:0071346	cellular response to type II interferon	25/1480	122/28891	2.43617e-09	5.10712e-08	3.24543e-08	Stxbp2/Stxbp3/Stx8/Stxbp1/Irgm1/Kif5b/Flnb/Tyk2/Zyx/Dapk3/Vamp3/Ifngr1/Vps26b/Sirpa/Myo1c/Dnaja3/Eprs1/Myo18a/Stat1/Vamp4/Cdc37/Jak1/Actr3/Stx11/Vim	25
GO:0034341	BP	GO:0034341	response to type II interferon	28/1480	150/28891	2.54762e-09	5.30236e-08	3.3695e-08	Stxbp2/Stxbp3/Ifitm3/Ifitm2/Stx8/Stxbp1/Irgm1/Kif5b/Flnb/Tyk2/Zyx/Dapk3/Vamp3/Ifngr1/Vps26b/Sirpa/Myo1c/Dnaja3/Eprs1/Myo18a/Stat1/Vamp4/Cdc37/Jak1/Trim21/Actr3/Stx11/Vim	28
GO:0090316	BP	GO:0090316	positive regulation of intracellular protein transport	28/1480	150/28891	2.54762e-09	5.30236e-08	3.3695e-08	Flna/Bcap31/Ipo5/Tmem30a/Tnfrsf1a/Stom/Asph/Tm9sf4/Kif5b/Gsk3b/Bag3/Mavs/Erbb2/Kif20b/Psen1/Fis1/Fyn/Xpo4/Myo1c/Prkaa1/Arpc2/Cdk1/Emd/Actr3/Cib1/Mapk1/Cep131/Ubr5	28
GO:0051046	BP	GO:0051046	regulation of secretion	80/1480	778/28891	2.6656e-09	5.52803e-08	3.51291e-08	Hgs/Vamp7/Erbb3/Acvr2a/Sdcbp/Stxbp2/Stam/Stxbp3/Syt4/Syt11/Atp2a2/Tnfrsf1a/Gja1/Tmed10/Vps35/Rala/Neo1/Lrp5/Slc38a2/Slc4a8/Lgals9/Acsl3/Adam9/Stxbp1/Srebf1/Pdcd6ip/Tsg101/Tm7sf3/Rab34/Kif5b/Rab5a/Slc12a2/Ptpn23/Gna11/Ppia/Tmem132a/Slc30a1/Pnkd/Rab8b/Wls/Vamp3/Gnaq/Slc16a1/Ptpn11/Arf1/Rac1/Rtn4/Rhot1/Rab8a/Uqcc2/Myo6/Psmd9/Anxa5/Stk39/Efna5/Gnas/Myo5a/Myo18a/Vps4b/Arf6/Tcirg1/Bsg/Myh10/Prkar1a/Rhb…	80
GO:0048024	BP	GO:0048024	regulation of mRNA splicing, via spliceosome	24/1480	114/28891	2.8624e-09	5.89389e-08	3.74541e-08	Srsf9/Tra2b/Srsf6/Celf2/Srsf10/Srrm1/Tra2a/Clns1a/Magoh/Srsf3/Thrap3/Rbm10/Prmt5/Rbm5/Qki/Larp7/Hspa8/Rbm25/Wtap/Wdr77/Sfswap/Rbfox2/Ythdc1/Sf3b4	24
GO:1905477	BP	GO:1905477	positive regulation of protein localization to membrane	24/1480	114/28891	2.8624e-09	5.89389e-08	3.74541e-08	Epha3/Atp2c1/Snx27/Ezr/Ssh1/Stom/Acsl3/Itgb1/Kif5b/Erbb2/Sptbn1/Fis1/Fyn/Rer1/Pgrmc1/Lrp4/Myo1c/Sqstm1/Myo5a/Arf6/Arpc2/Actr3/Cib1/Dlg1	24
GO:0033157	BP	GO:0033157	regulation of intracellular protein transport	36/1480	232/28891	2.90782e-09	5.96618e-08	3.79134e-08	Flna/Vamp7/Bcap31/Chp1/Xpo1/Ipo5/Tmem30a/Tnfrsf1a/Stom/Asph/Tm9sf4/Snx3/Srebf1/Kif5b/Gsk3b/Bag3/Mavs/Erbb2/Kif20b/Ptpn11/Psen1/Fis1/Fyn/Ptpn1/Xpo4/Myo1c/Prkaa1/Arpc2/Cdk1/Emd/Actr3/Cib1/Mapk1/Cep131/Ubr5/Bag4	36
GO:0070050	BP	GO:0070050	neuron cellular homeostasis	19/1480	73/28891	3.03708e-09	6.20937e-08	3.94588e-08	Atp7a/Atp6v0d1/Atp2a2/Atp6v1h/Tyro3/Atp6v1a/Atp6v1b2/Immt/Atp6ap2/Atp6v1e1/Atp6v0a1/Atp6v1d/Psen1/Atp6v1c1/Psen2/Tmem175/Prkaa1/Tmem106b/Atp6v1g1	19
GO:0071692	BP	GO:0071692	protein localization to extracellular region	54/1480	441/28891	3.10121e-09	6.31817e-08	4.01502e-08	Steap3/Gnptab/Stxbp3/Syt4/Preb/Gja1/Tmed10/Vps35/Neo1/Lrp5/Slc4a8/Adam9/Srebf1/Tm7sf3/Rab34/Kif5b/Slc12a2/M6pr/Ptpn23/Gna11/Ppia/Tmem132a/Acvr2b/Rab8b/Wls/Gnaq/Slc16a1/Ptpn11/Arf1/Rac1/Raf1/Copg1/Rab8a/Uqcc2/Psmd9/Anxa5/Efna5/Gnas/Myo5a/Myo18a/Tmed2/Arf6/Tcirg1/Copg2/Bsg/Myh10/Prkar1a/Rab13/Myh9/Map4k4/Ttn/Frmd4a/Tvp23b/Golph3	54
GO:0048729	BP	GO:0048729	tissue morphogenesis	74/1480	700/28891	3.24635e-09	6.59065e-08	4.18818e-08	Plxna1/Fat1/Flna/Plxnd1/Bmpr2/Notch2/Nrp2/Plxnb2/Ddr1/Atp7a/Tgfbr2/Mmp14/Acvrl1/Acvr1/Met/Bmpr1a/Tgfbr1/Mib1/Gja1/Rala/Eng/Lrp5/Gna13/Epha7/Znrf3/Pdgfra/Igf1r/Sema4c/Cd44/Rhoa/Prkacb/Vangl2/Slc12a2/Naglu/Hs2st1/Phldb2/Mthfd1l/Ryk/Rhob/Luzp1/Lgr4/Wls/Kif20b/Psen1/Frs2/Rac1/Nrp1/Sox10/Grb2/Tmtc3/Fkbp1a/Tmed2/Ilk/Lzts2/Bsg/Exoc4/Smad7/Kdm2a/Scrib/Ppp1ca/Prkar1a/Pfn1/Tsc2/Dag1/Spry2/Dab2/Ttn/Sapcd2/P…	74
GO:0097401	BP	GO:0097401	synaptic vesicle lumen acidification	10/1480	18/28891	3.62338e-09	7.33038e-08	4.65825e-08	Atp6v0d1/Atp6v1h/Atp6v1a/Atp6v1b2/Atp6ap2/Atp6v1e1/Atp6v0a1/Atp6v1d/Atp6v1c1/Atp6v1g1	10
GO:0033619	BP	GO:0033619	membrane protein proteolysis	17/1480	59/28891	3.75682e-09	7.57386e-08	4.81298e-08	Adam10/Bace2/Adam17/Adam9/Sppl2b/Ncstn/Psen1/Lrig2/Psen2/Snx33/H13/Rhbdd1/Sppl2a/Myh9/Pacsin3/Afg3l2/Dag1	17
GO:0006887	BP	GO:0006887	exocytosis	50/1480	395/28891	3.91177e-09	7.85885e-08	4.99408e-08	Hgs/Vamp7/Steap3/Pi4k2a/Sdcbp/Stxbp2/Stam/Stxbp3/Syt4/Syt11/Scamp1/Atp2a2/Napa/Tmed10/Kit/Rala/Ralb/Slc4a8/Lgals9/Stxbp1/Pdcd6ip/Tsg101/Rab10/Rab5a/Sacm1l/Stx2/Rab8b/Vamp3/Psen1/Arf1/Rab8a/Rab31/Snap47/Myo5a/Vps4b/Exoc1/Exoc4/Myh10/Scrib/Rab13/Rap1a/Hmox1/Exoc8/Exoc2/Myh9/Stx11/Vps4a/Rab21/Septin2/Sdf4	50
GO:0080135	BP	GO:0080135	regulation of cellular response to stress	72/1480	677/28891	4.11497e-09	8.23849e-08	5.23533e-08	Flna/Itch/Ptprs/Bcap31/Marchf7/Steap3/Ptprf/Rell1/Met/Spred1/Cers2/Usp15/Neo1/Ezr/Rpa2/Slc38a2/Adam17/Igf1r/Sema4c/Pdia6/Amfr/Cd44/Pcna/Rnf13/Map2k2/Tnfrsf19/Bax/Efhd1/Ppia/Vdac1/Trim32/Tmem33/Mms19/Mtch2/Lrig2/Coro2b/Ptpn1/Nbr1/Rtn4/Ackr3/Sirpa/Spred2/Stk39/Rap2a/Map2k1/Tmed2/Sf3b5/Taf4/Smarcc2/Dnaja1/Map2k7/Sf3b3/Eif2ak3/Cul4a/Tlr3/Tpt1/Dek/Fus/Mapk1/Pnkp/Tmbim6/Suv39h1/Ruvbl2/Usp19/Smarcb1/Dab…	72
GO:1901888	BP	GO:1901888	regulation of cell junction assembly	37/1480	246/28891	4.21896e-09	8.39697e-08	5.33604e-08	Epha3/Nedd4l/Ptprs/Ptpra/Ptprd/Adgrl2/Mmp14/Acvrl1/Il1rap/Gja1/Vps35/Epha7/Rhoa/Tjp1/Gsk3b/Phldb2/Dapk3/Chd4/Ptpn11/Rhod/Rac1/Nrp1/Sipa1l1/Cux2/Stau2/Myo1c/Adgre5/Rap2a/Efna5/Arf6/Clstn1/Actr3/Rap1a/Myh9/Lzts3/Map4k4/Cfl1	37
GO:0016236	BP	GO:0016236	macroautophagy	39/1480	268/28891	4.22316e-09	8.39697e-08	5.33604e-08	Stx12/Aup1/Gaa/Scfd1/Sptlc1/Atp2a2/Rab1b/Ralb/Retreg3/Irgm1/Pdcd6ip/Sec22b/Bag3/Tom1/Vdac1/Atp6v0a1/Psen1/Sptlc2/Lgals8/Vti1a/Dnajc16/Vti1b/Nbr1/Plaa/Npc1/Sqstm1/Myo5a/Vps4b/Chmp5/Tcirg1/Cdc37/Lamp2/Hmox1/Usp30/Pik3c3/Chmp1a/Tsc2/Vps4a/Ambra1	39
GO:0045862	BP	GO:0045862	positive regulation of proteolysis	48/1480	372/28891	4.27284e-09	8.46667e-08	5.38033e-08	Hspa1b/Stub1/Bcap31/Mmp14/Rnf19a/Csnk1e/Hspbp1/Timm23/Asph/Ankib1/Adam9/Plk1/Rnf144a/Rnf19b/Mtch1/Rhoa/Antxr1/Gsk3b/Aifm1/Bax/Timm17a/Ncstn/Bag2/Trim32/Psen1/Mtch2/Fis1/Fyn/Psen2/Tmtc3/Usp5/Dnaja3/Tfap4/Pdcd2/Psme3/Snx33/Stat1/Eif2ak3/Ndufa13/Rhbdd1/Ist1/Myh9/Pacsin3/Pdcd6/Dab2/Fbxw11/Cln6/Cfl1	48
GO:0072655	BP	GO:0072655	establishment of protein localization to mitochondrion	22/1480	99/28891	4.4734e-09	8.83382e-08	5.61365e-08	Bcap31/Samm50/Rala/Timm23/Tomm40/Agk/Hspa4/Srebf1/Mtch1/Tomm22/Aifm1/Bag3/Bax/Timm17a/Mtch2/Timm29/Fis1/Prkaa1/Dnaja1/Ndufa13/Hk2/Bag4	22
GO:1904377	BP	GO:1904377	positive regulation of protein localization to cell periphery	19/1480	75/28891	4.96216e-09	9.76566e-08	6.2058e-08	Epha3/Atp2c1/Vps35/Ezr/Acsl3/Itgb1/Rab38/Kif5b/Epb41/Sptbn1/Rer1/Pgrmc1/Sqstm1/Myo5a/Arf6/Gpsm2/Actr3/Cib1/Dlg1	19
GO:0072666	BP	GO:0072666	establishment of protein localization to vacuole	17/1480	60/28891	4.9927e-09	9.79246e-08	6.22284e-08	Hgs/Vamp7/Gnptab/Stam/Sort1/Irgm1/Nedd4/M6pr/Ptpn23/Vps28/Vps37b/Sqstm1/Hspa8/Lamp2/Zfyve16/Pik3c3/Vps4a	17
GO:0099003	BP	GO:0099003	vesicle-mediated transport in synapse	39/1480	270/28891	5.22591e-09	1.02152e-07	6.4915e-08	Atp6v0d1/Syt4/Syt11/Canx/Atp2a2/Napa/Atp6v1h/Vps35/Rala/Vac14/Slc4a8/Stxbp1/Atp6v1a/Nedd4/Atp6v1b2/Rab5a/Atp6ap2/Sacm1l/Atp6v1e1/Stx2/Atp6v0a1/Dnm2/Atad1/Atp6v1d/Psen1/Cyfip1/Atp6v1c1/Plaa/Rab8a/Myo6/Snap47/Arf6/Vamp4/Clstn1/Scrib/Atp6v1g1/Rap1a/Arhgdia/Stx11	39
GO:1902532	BP	GO:1902532	negative regulation of intracellular signal transduction	65/1480	589/28891	5.57831e-09	1.08674e-07	6.90591e-08	Itch/Rnf149/Marchf7/Mgrn1/Chp1/Met/Spred1/Ezr/Ubr2/Vdac2/Bag5/Itgb1/Igf1r/Irgm1/Ivns1abp/Stambp/Cd44/Sema6a/Rhoa/Prkacb/Rasal3/Gsk3b/Ppia/Cul3/Trim32/Ndufs3/Adipor1/Fyn/Ptpn1/Trim59/Ackr3/Rffl/Sirpa/Npc1/Arhgap42/Vrk3/Spred2/Map2k1/Dnaja3/Pin1/Prkaa1/Ppm1b/Stat1/Stk38/Dnaja1/Smad7/Tpt1/Usp7/Ndufa13/Cib1/Plekha1/Flcn/Tmbim6/Ppp2ca/Armc10/Tsc2/Dag1/Pdcd6/Spry2/Dab2/Fbxw11/Sco1/Cnksr3/Tns3/Dlg1	65
GO:2001233	BP	GO:2001233	regulation of apoptotic signaling pathway	53/1480	437/28891	6.04366e-09	1.17344e-07	7.45691e-08	Ubb/Bcap31/Marchf7/Steap3/Acvr1/Tgfbr1/Itm2c/Usp15/Vdac2/Bag5/Ivns1abp/Unc5b/Cd44/Acsl5/Gsk3b/Bax/Ppia/Ppp2r1b/Bclaf1/Trim32/Nle1/Dapk3/Sgk3/Ndufs3/Psen1/Mtch2/Fis1/Nrp1/Prodh/Fyn/Ptpn1/Raf1/Tmc8/Psen2/Ackr3/Rffl/Map2k1/Psme3/Dnaja1/Eif2ak3/Zc3hc1/Tpt1/Ndufa13/Ppp1ca/Itga6/Hmox1/Flcn/Tmbim6/Armc10/Dab2/Eef1e1/Birc6/Trps1	53
GO:0050770	BP	GO:0050770	regulation of axonogenesis	31/1480	186/28891	6.36526e-09	1.23175e-07	7.82745e-08	Plxna1/Plxnd1/Bmpr2/Plxnb2/Ptprs/Plxna2/Plxnb1/Plxna4/Epha7/Sema4c/Sema6a/Map2k2/Gsk3b/Ryk/Psen1/Cyfip1/Nrp1/Dbnl/Sipa1l1/Rtn4/Trpv2/Lrp4/Dbn1/Map2k1/Efna5/Ilk/Actr3/Ist1/Rpl4/Tsc2/Vim	31
GO:0006898	BP	GO:0006898	receptor-mediated endocytosis	39/1480	272/28891	6.45069e-09	1.24412e-07	7.90606e-08	Itch/Hgs/Tgfbr2/Sdcbp/Syt11/Canx/Ifitm3/Tfrc/Rala/Ralb/Ezr/Ankrd13a/Ldlr/Vac14/Insr/Itgb1/Ldlrad3/Nedd4/Snx17/Cd44/Rab5a/Atp5f1b/Dnm2/Atad1/Snx1/Arf1/Scyl2/Grb2/Ackr3/Myo6/Rab31/Lmbrd1/Scrib/Cap1/Gpr107/Dab2/Rab21/Gak/Pard3	39
GO:0042327	BP	GO:0042327	positive regulation of phosphorylation	80/1480	795/28891	7.05842e-09	1.35681e-07	8.62216e-08	Bmpr2/Notch2/Ddr2/Ddr1/Il6st/Erbb3/Acvr2a/Sdcbp/Ephb4/Acvr1/Met/Tnfrsf1a/Tfrc/Kit/Ralb/Eng/Epha7/Insr/Adam17/Tyro3/Pdgfra/Adam9/Itgb1/Igf1r/Plk1/Irgm1/Cd44/Rhoa/Vangl2/Rap2b/Map2k2/Gsk3b/Tab1/Ppia/Hspa2/Ryk/Mob2/Mavs/Erbb2/Ptpn11/Psen1/Ehd4/Rac1/Nrp1/Fyn/Ptpn1/Raf1/Wdfy2/Rap2c/Lrp4/Hax1/Sqstm1/Rap2a/Map2k1/Efna5/Gnas/Yes1/Pin1/Ilk/Dstyk/Map2k7/Fzd7/Cib1/Rap1a/Itga6/Cnot9/Mapk1/Araf/Telo2/Mertk/Fl…	80
GO:2000641	BP	GO:2000641	regulation of early endosome to late endosome transport	10/1480	19/28891	7.29649e-09	1.39793e-07	8.88346e-08	Ezr/Snx3/Map2k2/Snx12/Ptpn23/Map2k1/Rdx/Mapk1/Dab2/Rab21	10
GO:0031333	BP	GO:0031333	negative regulation of protein-containing complex assembly	28/1480	157/28891	7.34132e-09	1.40188e-07	8.90854e-08	Syt11/Vps35/Ssh1/Vdac2/Stxbp1/Capza2/Irgm1/Capza1/Tbcd/Add1/Gsk3b/Capzb/Cracd/Sptbn1/Raf1/Tmc8/Arfgef1/Sptan1/Flii/Add3/Hspa8/Rdx/Arpc2/Tmod3/Lamp2/Pfn1/Fbxl2/Cfl1	28
GO:0071375	BP	GO:0071375	cellular response to peptide hormone stimulus	41/1480	296/28891	7.40186e-09	1.40879e-07	8.95245e-08	Ptpra/Ptprf/Atp2b1/Insr/Igf1r/Srebf1/Rab10/Cdk2/Gsk3b/Adcy6/Srsf3/Tyk2/Snx5/Ptpn11/Adipor1/Rac1/Cyfip1/Wdtc1/Ptpn1/Raf1/Grb2/Rab8a/Myo1c/Rab31/Anxa5/Map2k1/Gnas/Eprs1/Myo5a/Prkaa1/Jak1/Ahcyl1/Prkar1a/Rab13/Mapk1/Tsc2/Shc1/Sco1/H2az1/Cfl1/Uso1	41
GO:0061951	BP	GO:0061951	establishment of protein localization to plasma membrane	18/1480	69/28891	7.56858e-09	1.4358e-07	9.12409e-08	Vamp7/Atp2c1/Snx27/Vps35/Acsl3/Rab34/Nectin3/Vamp3/Sptbn1/Rab8a/Gga2/Golga7/Rab31/Rdx/Vamp4/Scrib/Vamp5/Golph3	18
GO:0007007	BP	GO:0007007	inner mitochondrial membrane organization	13/1480	35/28891	8.13527e-09	1.53826e-07	9.77519e-08	Samm50/Chchd6/Agk/Chchd3/Immt/Bax/Micos13/Dnajc11/Timm29/Afg3l1/Ndufa13/Afg3l2/Adck1	13
GO:0098927	BP	GO:0098927	vesicle-mediated transport between endosomal compartments	15/1480	48/28891	9.02547e-09	1.70102e-07	1.08095e-07	Flna/Ezr/Snx3/Stx8/Rab5a/Map2k2/Snx12/Ptpn23/Map2k1/Rdx/Mapk1/Pik3c3/Dab2/Rab21/Hook3	15
GO:0061462	BP	GO:0061462	protein localization to lysosome	16/1480	55/28891	9.25208e-09	1.73807e-07	1.10449e-07	Hgs/Gnptab/Sort1/Nedd4/Lamtor1/M6pr/Rtn4/Rragc/Lmbrd1/Hspa8/Glmp/Lamp2/Rraga/Zfyve16/Pik3c3/Vps4a	16
GO:0010720	BP	GO:0010720	positive regulation of cell development	62/1480	560/28891	1.1093e-08	2.07716e-07	1.31997e-07	Plxna1/Plxnd1/Bmpr2/Notch2/Plxnb2/Ptpra/Ptprd/Vamp7/Il6st/Tgfbr2/Mmp14/Ptprf/Plxna2/Met/Dct/Plxnb1/Plxna4/Cip2a/Gja1/Kit/Lgals9/Itgb1/Cul7/Rhoa/Add1/Man2a1/Map2k2/Gsk3b/Atp11c/Trim32/Wls/Cyfip1/Nrp1/Prmt5/Sox10/Dbnl/Cux2/Rtn4/Trpv2/Qki/Stau2/Hax1/Dbn1/Map2k1/Efna5/Gnas/Ilk/Rheb/Bag1/Smarcc2/Smad7/Srrt/Actr3/Ppp1cc/Slc7a5/Ist1/Rpl4/Dag1/Vim/Smarcb1/Rab21/Ambra1	62
GO:0031503	BP	GO:0031503	protein-containing complex localization	36/1480	244/28891	1.14109e-08	2.12979e-07	1.35342e-07	Xpo1/Adam10/Stx7/Neto2/Vps35/Rala/Ralb/Ezr/Vac14/Itgb1/Nedd4/Ndc1/Kif5b/Sacm1l/Gsk3b/Ipo9/Erbb2/Atad1/Rbm10/Rapsn/Rab8a/Stau2/Nop9/Myo6/Dbn1/Snap47/Map2k1/Rdx/Clstn1/Smad7/Scrib/Rap1a/Cep131/Dag1/Eif6/Dlg1	36
GO:0070925	BP	GO:0070925	organelle assembly	93/1480	988/28891	1.17073e-08	2.17808e-07	1.38411e-07	Hspa1b/Flna/Ptprs/Ptprd/Stx12/Abca3/Sdcbp/Stam/Aup1/Abcc4/Scfd1/Atp2a2/Rab1b/Il1rap/Pisd/Stx7/Ralb/Ezr/Sh3pxd2b/Pdgfra/Aaas/Itgb1/Plk1/Irgm1/Rab38/Pdcd6ip/Tsg101/Ehd1/Arf4/Abcb6/Rab34/Dnaaf5/Rhoa/Cdk2/Vangl2/Sec22b/Gsk3b/Bag3/Ptpn23/Tom1/Dync1h1/Nle1/Nisch/Dnm2/Atp6v1d/Vdac3/Psen1/Ehd4/Stx18/Ablim1/Rab32/Dbnl/Sipa1l1/Flii/Rab8a/Prrc2c/Cds2/Ap1m1/Rdx/Vps4b/Chmp5/Tmem175/Prkaa1/Tcirg1/Arpc2/Ccnb2/T…	93
GO:0043434	BP	GO:0043434	response to peptide hormone	49/1480	396/28891	1.17559e-08	2.18011e-07	1.3854e-07	Ptpra/Ptprf/Atp2b1/Stxbp3/Atp2a2/Insr/Igf1r/Sort1/Srsf5/Srebf1/Eif2b1/Rab10/Cdk2/Gsk3b/Adcy6/Srsf3/Tyk2/Snx5/Ptpn11/Adipor1/Rac1/Cyfip1/Wdtc1/Ptpn1/Raf1/Grb2/Rab8a/Myo1c/Rab31/Anxa5/Map2k1/Gnas/Eprs1/Myo5a/Prkaa1/Stat1/Jak1/Ahcyl1/Prkar1a/Rab13/Mapk1/Tsc2/Shc1/Sco1/H2az1/Eif6/Cfl1/Uso1/Scly	49
GO:0097120	BP	GO:0097120	receptor localization to synapse	20/1480	87/28891	1.20471e-08	2.22698e-07	1.41518e-07	Adam10/Stx7/Neto2/Vps35/Itgb1/Kif5b/Sacm1l/Gsk3b/Erbb2/Rapsn/Rab8a/Dbn1/Snap47/Map2k1/Rdx/Clstn1/Scrib/Rap1a/Dag1/Dlg1	20
GO:0048813	BP	GO:0048813	dendrite morphogenesis	31/1480	192/28891	1.38063e-08	2.54406e-07	1.61668e-07	Nedd4l/Ptprd/Atp7a/Vamp7/Ptprf/Kidins220/Met/Adam10/Itgb1/Nedd4/Cul7/Zdhhc15/Gsk3b/Wls/Rac1/Nrp1/Fyn/Dbnl/Sipa1l1/Cux2/Stau2/Lrp4/Dbn1/Rap2a/Ilk/Tmem106b/Actr3/Lzts3/Rbfox2/Rab21/Cfl1	31
GO:0007035	BP	GO:0007035	vacuolar acidification	11/1480	25/28891	1.40773e-08	2.58575e-07	1.64317e-07	Atp6v0d1/Atp6v0a2/Atp6v1b2/Atp6ap2/Atp6v0a1/Tmem9/Ccdc115/Tcirg1/Atp6v0c/Tmem106b/Cln6	11
GO:0009611	BP	GO:0009611	response to wounding	60/1480	538/28891	1.46234e-08	2.67757e-07	1.70152e-07	Flna/Notch2/Ptprs/Ddr2/Ddr1/Atp7a/Ptprf/Acvrl1/Stxbp3/Syt11/Cers2/Neo1/Eng/Dcbld2/Gna13/Adam17/Ano6/Tyro3/Pdgfra/Itgb1/Igf1r/Stxbp1/Srsf5/Srsf6/Cd44/Vangl2/Rap2b/Slc12a2/Map2k2/Naglu/Bax/Ppia/Phldb2/P2rx4/Erbb2/Gnaq/Myof/Lrig2/Nrp1/Arfgef1/Anxa5/Map2k1/Gnas/Vps4b/Chmp5/Map2k7/Myh10/Tlr3/Fzd7/Scrib/St3gal4/Hmox1/Plec/Myh9/Mertk/Chmp1a/Serpinc1/Vps4a/Zfp36l2/Pard3	60
GO:0007417	BP	GO:0007417	central nervous system development	93/1480	993/28891	1.49317e-08	2.72538e-07	1.73191e-07	Tubb2b/Ubb/Plxna1/Flna/Unc5c/Nrp2/Plxnb2/Ptprs/Ptpra/Atp7a/Daam2/Il6st/Tgfbr2/Slc4a7/Abcb1b/Stxbp3/Plxna2/Met/Bmpr1a/Dct/Atrn/Phgdh/Plxna4/Abcc1/Napa/Aplp2/Ldlr/Lrp5/Epha7/Tyro3/Itgb1/Igf1r/Tra2b/Adgrg1/Sema4c/Eif2b1/Abcb6/Rhoa/Atp6ap2/Gsk3b/Naglu/Bax/Ncstn/Uqcrq/Ryk/Erbb2/Wls/Gnaq/Ptpn11/Psen1/Ifngr1/Gnpat/Frs2/Sptbn1/Rac1/Nrp1/Fyn/Prmt5/Sox10/Psen2/Scyl2/Rtn3/Rtn4/Ackr3/Arcn1/Qki/Map2k1/Vps4b/R…	93
GO:0010564	BP	GO:0010564	regulation of cell cycle process	76/1480	754/28891	1.57056e-08	2.85364e-07	1.81341e-07	Hspa1b/Ddr2/Acvr1/Xpo1/Met/Zw10/Gja1/Rpa2/Dync1li1/Insr/Adam17/Ctdspl/Igf1r/Plk1/Pdcd6ip/Cul7/Pkp4/Klhl22/Ctdsp2/Rhoa/Ctdsp1/Adamts1/Cdk2/Ncapg/Klhl13/Wiz/Hspa2/Ppp2r5c/Cul3/Dync1h1/Ranbp1/Kif20b/Dtl/Ptpn11/Larp7/Rdx/Vps4b/Pin1/Rae1/Chmp5/Tfap4/Zwilch/Psme3/Myo19/Smarcc2/Smc2/Smc4/Cdk1/Tmod3/Cul4a/Chtf18/Gpsm2/Rrm2/Ncapd2/Cenpv/Drg1/Cep131/Gipc1/Cetn2/Wapl/Pik3c3/Flcn/Chmp1a/Snd1/Ppp2ca/Usp19/Erc…	76
GO:0198738	BP	GO:0198738	cell-cell signaling by wnt	54/1480	462/28891	1.5733e-08	2.85364e-07	1.81341e-07	Daam2/Usp8/Daam1/Csnk1e/Vps35/Lrp5/Snx3/Znrf3/Gid8/Amfr/Csnk1g2/Cd44/Csnk1g3/Rab5a/Vangl2/Atp6ap2/Gsk3b/Ptpn23/Tmem132a/Spin1/Ryk/Cul3/Lgr4/Nle1/Wls/Dapk3/Gnaq/Psen1/Rac1/Grk6/Sox10/Scyl2/Lrrfip2/Tmem9/Lrp4/Mitf/Vps4b/Pin1/Ilk/Prkaa1/Atp6v0c/Ppm1b/Lzts2/Emd/Fzd7/Ctdnep1/Ubr5/Ruvbl2/Amotl1/Tsc2/Dab2/Fbxw11/Paf1/Cdc73	54
GO:0071826	BP	GO:0071826	protein-RNA complex organization	30/1480	183/28891	1.64423e-08	2.97297e-07	1.88924e-07	Setx/Snrpb/Srsf6/Celf2/Kif5b/Snrpd1/Srsf10/Clns1a/Nle1/Prpf31/Snrnp200/Prmt5/Rbm5/Sf3b1/Snrpd3/Srpk1/Usp4/Wdr77/Sfswap/Prpf8/Tarbp2/Mrps7/Ythdc1/Ruvbl2/Ddx28/Eif6/Cdc73/Mbnl1/Ptbp2/Polr2d	30
GO:0010631	BP	GO:0010631	epithelial cell migration	43/1480	328/28891	1.69064e-08	3.04737e-07	1.93652e-07	Plxnd1/Bmpr2/Daam2/Tgfbr2/Ptprm/Acvrl1/Ephb4/Met/Tgfbr1/Spred1/Kit/Adam17/Adam9/Itgb1/Rhoa/Atp5f1b/Ptpn23/Nus1/Rhoj/Atp5f1a/Rhob/P2rx4/Ptpn11/Adipor1/Lgals8/Rac1/Nrp1/Rras/Rtn4/Arf6/Bsg/Nr2f2/Cib1/Rab13/Hmox1/Sparc/Myh9/Pfn1/Gipc1/Amotl1/Pdcd6/Map4k4/Tns3	43
GO:0097190	BP	GO:0097190	apoptotic signaling pathway	69/1480	660/28891	1.72531e-08	3.10019e-07	1.97009e-07	Ubb/Atp7a/Bcap31/Marchf7/Steap3/Erbb3/Acvr1/Tgfbr1/Itm2c/Tnfrsf1a/Usp15/Vdac2/Bag5/Sort1/Acvr1b/Ivns1abp/Unc5b/Cd44/Acsl5/Gsk3b/Aifm1/Bag3/Bax/Ppia/Ppp2r1b/Ppp2r5c/Bclaf1/Trim32/P2rx4/Nle1/Dapk3/Sgk3/Ndufs3/Psen1/Rhot2/Mtch2/Fis1/Nrp1/Prodh/Fyn/Ptpn1/Raf1/Tmc8/Psen2/Ackr3/Rhot1/Rffl/Map2k1/Psme3/Dnaja1/Tnfrsf10b/Tmem109/Eif2ak3/Tlr3/Polb/Zc3hc1/Tpt1/Ndufa13/Ppp1ca/Itga6/Hmox1/Flcn/Tmbim6/Armc10/D…	69
GO:0071560	BP	GO:0071560	cellular response to transforming growth factor beta stimulus	36/1480	248/28891	1.75875e-08	3.15051e-07	2.00206e-07	Stub1/Tgfbr2/Acvrl1/Sdcbp/Acvr1/Bmpr1a/Tgfbr1/Spred1/Usp15/Eng/Smurf2/Lgals9/Adam17/Adam9/Igf1r/Ptprk/Tab1/Zyx/Dnm2/Snx1/Fyn/Stk16/Dbn1/Spred2/Snx6/Yes1/Pin1/Smad7/Actr3/Snx25/Glg1/Gipc1/Flcn/Spry2/Dab2/Zfp36l2	36
GO:0090132	BP	GO:0090132	epithelium migration	43/1480	330/28891	2.02409e-08	3.61462e-07	2.29699e-07	Plxnd1/Bmpr2/Daam2/Tgfbr2/Ptprm/Acvrl1/Ephb4/Met/Tgfbr1/Spred1/Kit/Adam17/Adam9/Itgb1/Rhoa/Atp5f1b/Ptpn23/Nus1/Rhoj/Atp5f1a/Rhob/P2rx4/Ptpn11/Adipor1/Lgals8/Rac1/Nrp1/Rras/Rtn4/Arf6/Bsg/Nr2f2/Cib1/Rab13/Hmox1/Sparc/Myh9/Pfn1/Gipc1/Amotl1/Pdcd6/Map4k4/Tns3	43
GO:0016049	BP	GO:0016049	cell growth	61/1480	556/28891	2.03595e-08	3.62463e-07	2.30335e-07	Plxna1/Bmpr2/Nrp2/Nedd4l/Ptprs/Ddr1/Tgfbr2/Mmp14/Acvrl1/Sdcbp/Syt4/Tgfbr1/Plxna4/Adam10/Gja1/Dcbld2/Epha7/Adam17/Itgb1/Acvr1b/Sema4c/Tsg101/Klhl22/Cd44/Sema6a/Rhoa/Lamtor1/Gsk3b/Ryk/Trim32/Erbb2/Sec61a1/Dnm2/Ndufs3/Rbm10/Adipor1/Cyfip1/Nrp1/Dbnl/Plaa/Rtn4/Trpv2/Dbn1/Efna5/Pin1/Ilk/Clstn1/Exosc9/Smad7/Slc23a2/Actr3/Ndufa13/Cib1/Ist1/Rpl4/G6pdx/Smarcb1/Dab2/Rab21/Cdc73/Cfl1	61
GO:0010976	BP	GO:0010976	positive regulation of neuron projection development	35/1480	239/28891	2.2021e-08	3.90839e-07	2.48367e-07	Tubb2b/Epha3/Flna/Plxnb2/Ddr2/Ddr1/Kidins220/Met/Tmem30a/Adam17/Snx3/Retreg3/Itgb1/Igf1r/Setx/Ehd1/Adamts1/Zdhhc15/Mob2/Ranbp1/Cyfip1/Nrp1/Fyn/Dbnl/Cux2/Qki/Stau2/Dbn1/Tmem106b/Ppp2r5d/Actr3/Rap1a/Itga6/Fig4/Tsc2	35
GO:0022618	BP	GO:0022618	protein-RNA complex assembly	29/1480	175/28891	2.2138e-08	3.91714e-07	2.48923e-07	Setx/Snrpb/Srsf6/Celf2/Snrpd1/Srsf10/Clns1a/Nle1/Prpf31/Snrnp200/Prmt5/Rbm5/Sf3b1/Snrpd3/Srpk1/Usp4/Wdr77/Sfswap/Prpf8/Tarbp2/Mrps7/Ythdc1/Ruvbl2/Ddx28/Eif6/Cdc73/Mbnl1/Ptbp2/Polr2d	29
GO:0071417	BP	GO:0071417	cellular response to organonitrogen compound	73/1480	719/28891	2.24558e-08	3.96126e-07	2.51727e-07	Flna/Ptpra/Atp7a/Ptprf/Atp2b1/Ipo5/Abcc1/Gja1/Vps35/Ezr/Ubr2/Ssh1/Insr/Gna14/Pdgfra/Igf1r/Srebf1/Klhl22/Rab10/Lamtor1/Cdk2/Gsk3b/Gna11/Adcy6/Ncstn/Srsf3/Tyk2/Cul3/P2rx4/Snx5/Dnm2/Gnaq/Ptpn11/Psen1/Adipor1/Rac1/Cyfip1/Fis1/Wdtc1/Palm/Fyn/Ptpn1/Prmt5/Raf1/Grb2/Rab8a/Myo1c/Rab31/Anxa5/Snx6/Map2k1/Gnas/Eprs1/Myo5a/Chmp5/Prkaa1/Arpc2/Jak1/Ahcyl1/Prkar1a/Rab13/Rap1a/Rraga/Mapk1/Tsc2/Shc1/Vim/Sco1/H2az1…	73
GO:1901699	BP	GO:1901699	cellular response to nitrogen compound	76/1480	761/28891	2.31969e-08	4.07955e-07	2.59244e-07	Flna/Ptpra/Atp7a/Ptprf/Atp2b1/Ipo5/Abcc1/Gja1/Vps35/Ralb/Ezr/Ubr2/Ssh1/Insr/Gna14/Pdgfra/Igf1r/Srebf1/Klhl22/Rab10/Lamtor1/Cdk2/Gsk3b/Gna11/Adcy6/Ncstn/Srsf3/Tyk2/Cul3/Mavs/P2rx4/Snx5/Dnm2/Gnaq/Ptpn11/Psen1/Adipor1/Rac1/Cyfip1/Fis1/Wdtc1/Palm/Fyn/Ptpn1/Prmt5/Raf1/Grb2/Rab8a/Myo1c/Rab31/Anxa5/Snx6/Map2k1/Gnas/Eprs1/Myo5a/Chmp5/Prkaa1/Arpc2/Jak1/Tlr3/Ahcyl1/Prkar1a/Rab13/Rap1a/Rraga/Mapk1/Tsc2/Shc1…	76
GO:0032868	BP	GO:0032868	response to insulin	37/1480	262/28891	2.35279e-08	4.12523e-07	2.62147e-07	Ptpra/Ptprf/Atp2b1/Stxbp3/Insr/Igf1r/Sort1/Srsf5/Srebf1/Rab10/Cdk2/Gsk3b/Srsf3/Snx5/Ptpn11/Adipor1/Cyfip1/Wdtc1/Ptpn1/Raf1/Grb2/Rab8a/Myo1c/Rab31/Map2k1/Eprs1/Myo5a/Prkaa1/Rab13/Mapk1/Tsc2/Shc1/Sco1/H2az1/Eif6/Uso1/Scly	37
GO:0090130	BP	GO:0090130	tissue migration	43/1480	332/28891	2.41893e-08	4.22068e-07	2.68213e-07	Plxnd1/Bmpr2/Daam2/Tgfbr2/Ptprm/Acvrl1/Ephb4/Met/Tgfbr1/Spred1/Kit/Adam17/Adam9/Itgb1/Rhoa/Atp5f1b/Ptpn23/Nus1/Rhoj/Atp5f1a/Rhob/P2rx4/Ptpn11/Adipor1/Lgals8/Rac1/Nrp1/Rras/Rtn4/Arf6/Bsg/Nr2f2/Cib1/Rab13/Hmox1/Sparc/Myh9/Pfn1/Gipc1/Amotl1/Pdcd6/Map4k4/Tns3	43
GO:0061077	BP	GO:0061077	chaperone-mediated protein folding	17/1480	66/28891	2.42182e-08	4.22068e-07	2.68213e-07	Hspa1b/Dnajc7/Hsph1/Cct8/Cct7/Dnajb12/Hspa2/Cct4/Dnajb6/Hspa8/Cct3/Bag1/Cct6a/Tor2a/Hspa13/Sdf2l1/Sdf2	17
GO:0071559	BP	GO:0071559	response to transforming growth factor beta	36/1480	252/28891	2.68142e-08	4.65907e-07	2.96071e-07	Stub1/Tgfbr2/Acvrl1/Sdcbp/Acvr1/Bmpr1a/Tgfbr1/Spred1/Usp15/Eng/Smurf2/Lgals9/Adam17/Adam9/Igf1r/Ptprk/Tab1/Zyx/Dnm2/Snx1/Fyn/Stk16/Dbn1/Spred2/Snx6/Yes1/Pin1/Smad7/Actr3/Snx25/Glg1/Gipc1/Flcn/Spry2/Dab2/Zfp36l2	36
GO:0042157	BP	GO:0042157	lipoprotein metabolic process	25/1480	137/28891	2.87305e-08	4.97709e-07	3.1628e-07	Zdhhc20/Ldlr/Ugcg/Pigs/Irgm1/Abhd12/Zdhhc15/Abhd17b/Pigt/Pign/Apob/Pigk/Abhd17c/Pigg/Gpaa1/Abhd17a/Zdhhc13/Golga7/Ppm1b/Nmt2/Dpm1/Zdhhc9/Pik3c3/Pigu/Nmt1	25
GO:0044403	BP	GO:0044403	biological process involved in symbiotic interaction	37/1480	264/28891	2.88277e-08	4.97902e-07	3.16403e-07	Slc3a2/Zdhhc20/Ifitm3/Stom/Ifitm2/Insr/Snx3/Tsg101/Rab5a/Nectin3/Napepld/Vps37b/Pi4ka/Nrp1/Trim59/Npc1/Vapb/Hspa8/Vps4b/Chmp5/Tfap4/Bsg/Trim21/Zdhhc9/Thoc2/Ist1/Thoc6/Exoc2/Ctsb/Pik3c3/Fbxl2/Chmp1a/Tpcn1/Vps4a/Smarcb1/Thoc3/Cfl1	37
GO:0006509	BP	GO:0006509	membrane protein ectodomain proteolysis	14/1480	45/28891	3.00926e-08	5.18201e-07	3.29302e-07	Adam10/Bace2/Adam17/Adam9/Sppl2b/Ncstn/Psen1/Lrig2/Psen2/Snx33/Sppl2a/Myh9/Pacsin3/Dag1	14
GO:0006643	BP	GO:0006643	membrane lipid metabolic process	30/1480	188/28891	3.09259e-08	5.30971e-07	3.37417e-07	Tm9sf2/Smpd4/Cers2/Sptlc1/Kit/Ugcg/Cerk/Agk/Pigs/St3gal6/Naglu/Bax/Pigt/Pign/Sptlc2/Pigk/Cers5/Pigg/Smpd2/Gpaa1/Serinc1/Sccpdh/Dpm1/St6galnac4/St3gal4/Ormdl3/Degs1/Pigu/Hacd3/Cln6	30
GO:0002009	BP	GO:0002009	morphogenesis of an epithelium	63/1480	589/28891	3.10539e-08	5.31591e-07	3.37811e-07	Plxna1/Fat1/Flna/Plxnd1/Notch2/Plxnb2/Ddr1/Atp7a/Tgfbr2/Mmp14/Acvrl1/Acvr1/Met/Mib1/Gja1/Rala/Eng/Lrp5/Gna13/Epha7/Znrf3/Pdgfra/Igf1r/Sema4c/Cd44/Rhoa/Prkacb/Vangl2/Slc12a2/Naglu/Hs2st1/Phldb2/Mthfd1l/Ryk/Rhob/Luzp1/Lgr4/Kif20b/Psen1/Frs2/Rac1/Nrp1/Sox10/Grb2/Tmtc3/Tmed2/Ilk/Lzts2/Bsg/Kdm2a/Scrib/Ppp1ca/Pfn1/Tsc2/Dag1/Spry2/Dab2/Sapcd2/Pax3/Alx1/Cfl1/Dlg1/Pard3	63
GO:0048762	BP	GO:0048762	mesenchymal cell differentiation	36/1480	254/28891	3.2978e-08	5.62863e-07	3.57684e-07	Epha3/Flna/Nrp2/Tgfbr2/Sdcbp/Acvr1/Bmpr1a/Tgfbr1/Spred1/Gja1/Eng/Sema4c/Cul7/Sema6a/Vangl2/Gsk3b/Phldb2/Adipor1/Nrp1/Sox10/Rtn4/Spred2/Aplf/Smad7/Mapk1/Ppp2ca/Phldb1/Tsc2/Dag1/Pdcd6/Spry2/Dab2/Pax3/Alx1/Cfl1/Mcrip1	36
GO:0016055	BP	GO:0016055	Wnt signaling pathway	53/1480	460/28891	3.44897e-08	5.86933e-07	3.7298e-07	Daam2/Usp8/Daam1/Csnk1e/Vps35/Lrp5/Snx3/Znrf3/Gid8/Amfr/Csnk1g2/Cd44/Csnk1g3/Rab5a/Vangl2/Atp6ap2/Gsk3b/Tmem132a/Spin1/Ryk/Cul3/Lgr4/Nle1/Wls/Dapk3/Gnaq/Psen1/Rac1/Grk6/Sox10/Scyl2/Lrrfip2/Tmem9/Lrp4/Mitf/Vps4b/Pin1/Ilk/Prkaa1/Atp6v0c/Ppm1b/Lzts2/Emd/Fzd7/Ctdnep1/Ubr5/Ruvbl2/Amotl1/Tsc2/Dab2/Fbxw11/Paf1/Cdc73	53
GO:0090100	BP	GO:0090100	positive regulation of transmembrane receptor protein serine/threonine kinase signaling pathway	21/1480	101/28891	3.46799e-08	5.88439e-07	3.73937e-07	Bmpr2/Notch2/Tgfbr2/Acvr2a/Acvrl1/Sdcbp/Acvr1/Bmpr1a/Tgfbr1/Neo1/Eng/Lgals9/Adam17/Acvr1b/Fkbp8/Nup93/Acvr2b/Ilk/Gipc1/Flcn/Dab2	21
GO:0030835	BP	GO:0030835	negative regulation of actin filament depolymerization	14/1480	46/28891	4.12217e-08	6.95361e-07	4.41883e-07	Capza2/Capza1/Add1/Capzb/Cracd/Sptbn1/Sptan1/Flii/Add3/Lima1/Rdx/Arpc2/Tmod3/Cfl1	14
GO:0051452	BP	GO:0051452	intracellular pH reduction	14/1480	46/28891	4.12217e-08	6.95361e-07	4.41883e-07	Slc4a7/Atp6v0d1/Atp6v0a2/Rab38/Atp6v1b2/Atp6ap2/Atp6v0a1/Tmem9/Ccdc115/Tcirg1/Atp6v0c/Tmem106b/Slc9a8/Cln6	14
GO:0016358	BP	GO:0016358	dendrite development	42/1480	327/28891	4.45564e-08	7.49428e-07	4.7624e-07	Nedd4l/Ptprs/Ptprd/Atp7a/Vamp7/Ptprf/Kidins220/Met/Adam10/Itgb1/Nedd4/Cul7/Arf4/Rhoa/Zdhhc15/Gsk3b/Wls/Psen1/Arf1/Rac1/Cyfip1/Nrp1/Palm/Fyn/Dbnl/Sipa1l1/Cux2/Stau2/Lrp4/Myo6/Dbn1/Rap2a/Ilk/Arf6/Tmem106b/Actr3/Lzts3/Rbfox2/Tsc2/Rab21/Cfl1/Cyth2	42
GO:0006903	BP	GO:0006903	vesicle targeting	16/1480	61/28891	4.71303e-08	7.90423e-07	5.02292e-07	Chp1/Stard3/Preb/Tmed10/Gbf1/Tmed9/Naglu/Cul3/Psen1/Exoc1/Exoc4/Scrib/Exoc8/Exoc2/Pdcd6/Trappc5	16
GO:0090158	BP	GO:0090158	endoplasmic reticulum membrane organization	8/1480	13/28891	4.75565e-08	7.95266e-07	5.0537e-07	Stx18/Rtn4/Vapb/Tmed2/Arl6ip1/Atl2/Reep5/Atl1	8
GO:0060485	BP	GO:0060485	mesenchyme development	41/1480	316/28891	4.83687e-08	8.06517e-07	5.12519e-07	Epha3/Flna/Bmpr2/Nrp2/Erbb3/Tgfbr2/Acvrl1/Sdcbp/Acvr1/Bmpr1a/Tgfbr1/Spred1/Gja1/Eng/Sema4c/Nedd4/Cul7/Sema6a/Vangl2/Gsk3b/Phldb2/Adipor1/Nrp1/Sox10/Rtn4/Spred2/Aplf/Exoc4/Smad7/Mapk1/Ppp2ca/Phldb1/Tsc2/Dag1/Pdcd6/Spry2/Dab2/Pax3/Alx1/Cfl1/Mcrip1	41
GO:0051693	BP	GO:0051693	actin filament capping	13/1480	40/28891	5.21508e-08	8.67082e-07	5.51006e-07	Capza2/Capza1/Add1/Capzb/Cracd/Sptbn1/Sptan1/Flii/Add3/Rdx/Arpc2/Tmod3/Cfl1	13
GO:1903532	BP	GO:1903532	positive regulation of secretion by cell	47/1480	390/28891	5.25144e-08	8.70626e-07	5.53259e-07	Hgs/Vamp7/Acvr2a/Sdcbp/Stxbp2/Stam/Syt4/Gja1/Tmed10/Vps35/Slc4a8/Adam9/Stxbp1/Pdcd6ip/Tsg101/Tm7sf3/Rab34/Kif5b/Rab5a/Slc12a2/Ptpn23/Gna11/Ppia/Tmem132a/Rab8b/Wls/Gnaq/Ptpn11/Arf1/Rac1/Rtn4/Psmd9/Gnas/Myo18a/Vps4b/Arf6/Bsg/Myh10/Prkar1a/Exoc2/Myh9/Aimp1/Vps4a/Dab2/Ttn/Frmd4a/Golph3	47
GO:0006623	BP	GO:0006623	protein targeting to vacuole	14/1480	47/28891	5.59466e-08	9.24878e-07	5.87734e-07	Hgs/Vamp7/Gnptab/Sort1/Irgm1/Nedd4/M6pr/Vps37b/Sqstm1/Hspa8/Lamp2/Zfyve16/Pik3c3/Vps4a	14
GO:0051338	BP	GO:0051338	regulation of transferase activity	78/1480	806/28891	5.75755e-08	9.49094e-07	6.03123e-07	Notch2/Hgs/Ddr2/Ddr1/Stub1/Erbb3/Chp1/Ephb4/Met/Arrdc3/Spred1/Aplp2/Kit/Ralb/Bag5/Insr/Adam17/Tyro3/Prpsap1/Pdgfra/Adam9/Igf1r/Plk1/Irgm1/Tsg101/Rhoa/Pcna/Ppp2r5a/Vangl2/Rap2b/Map2k2/Gsk3b/Tab1/Ppia/Ryk/Bag2/Erbb2/Gnaq/Psen1/Ptpn1/Cct4/Psen2/Rap2c/Serinc1/Map2k1/Hmbox1/Dnaja3/Pin1/Ilk/Tfap4/Ccnb2/Trim27/Dstyk/Stk38/Cdc37/Dnaja1/Smad7/Map2k7/Nr2f2/Chtf18/Prkar1a/Cib1/Rap1a/Mapk1/Ormdl3/Plec/Pnkp/T…	78
GO:0010563	BP	GO:0010563	negative regulation of phosphorus metabolic process	50/1480	430/28891	6.26287e-08	1.02654e-06	6.5234e-07	Ddr2/Kirrel1/Chp1/Met/Spred1/Eng/Insr/Hspa4/Prpsap1/Ctdspl/Plk1/Fkbp8/Tsg101/Ctdsp2/Ctdsp1/Ppp2r5a/Mgat5/Gsk3b/Bax/Ppia/Gnaq/Psen1/Fis1/Ptpn1/Psen2/Sirpa/Spred2/Dnaja3/Tmed2/Ilk/Tfap4/Trim27/Lpcat1/Bag1/Stk38/Dnaja1/Smad7/Nr2f2/Ppp2r5d/Prkar1a/Cib1/Plec/Ppp1r8/Flcn/Tsc2/Bag4/Spry2/Mprip/Cnksr3/Pard3	50
GO:0045936	BP	GO:0045936	negative regulation of phosphate metabolic process	50/1480	430/28891	6.26287e-08	1.02654e-06	6.5234e-07	Ddr2/Kirrel1/Chp1/Met/Spred1/Eng/Insr/Hspa4/Prpsap1/Ctdspl/Plk1/Fkbp8/Tsg101/Ctdsp2/Ctdsp1/Ppp2r5a/Mgat5/Gsk3b/Bax/Ppia/Gnaq/Psen1/Fis1/Ptpn1/Psen2/Sirpa/Spred2/Dnaja3/Tmed2/Ilk/Tfap4/Trim27/Lpcat1/Bag1/Stk38/Dnaja1/Smad7/Nr2f2/Ppp2r5d/Prkar1a/Cib1/Plec/Ppp1r8/Flcn/Tsc2/Bag4/Spry2/Mprip/Cnksr3/Pard3	50
GO:1903320	BP	GO:1903320	regulation of protein modification by small protein conjugation or removal	35/1480	249/28891	6.28226e-08	1.02681e-06	6.52511e-07	Ubb/Itch/Stub1/Marchf7/Chp1/Arrdc3/Ndfip1/Tgfbr1/Hspbp1/Bag5/Plk1/Tollip/Ivns1abp/Wbp1l/Gsk3b/Ppia/Vps28/Cul3/Bag2/Psen1/Fyn/Psen2/Plaa/Sqstm1/Dnaja3/Pin1/Usp4/Dnaja1/Smad7/Trim21/Gnl3l/Sae1/Pdcd6/Spry2/Skp1	35
GO:0048638	BP	GO:0048638	regulation of developmental growth	48/1480	405/28891	6.37605e-08	1.03921e-06	6.60387e-07	Bmpr2/Nedd4l/Ptprs/Tgfbr2/Syt4/Bmpr1a/Tgfbr1/Atrn/Plxna4/Gja1/Ezr/Epha7/Insr/Sh3pxd2b/Igf1r/Sema4c/Sema6a/Gpat4/Gsk3b/Ryk/Dnm2/Rbm10/Cyfip1/Nrp1/Dbnl/Plaa/Rtn4/Trpv2/Dbn1/Efna5/Gnas/Pin1/Ilk/Cdk1/Smad7/Slc23a2/Actr3/Ist1/Mapk1/Rpl4/Afg3l2/Suv39h1/Spr/G6pdx/Rab21/Cfl1/Dlg1/Chd7	48
GO:1902414	BP	GO:1902414	protein localization to cell junction	24/1480	133/28891	6.74998e-08	1.09706e-06	6.97152e-07	Flna/Adam10/Neto2/Vps35/Kif5b/Zdhhc15/Sacm1l/Tjp1/Nectin3/Gsk3b/Abhd17b/Erbb2/Rapsn/Rab8a/Stau2/Snap47/Map2k1/Tjp2/Clstn1/Jak1/Scrib/Rap1a/Dag1/Dlg1	24
GO:0051495	BP	GO:0051495	positive regulation of cytoskeleton organization	30/1480	195/28891	7.18284e-08	1.16089e-06	7.37714e-07	Flna/Kirrel1/Met/Tgfbr1/Sh3pxd2b/Rhoa/Cdc42ep1/Sorbs3/Dync1h1/Rhoc/Slain2/Cracd/Rac1/Cyfip1/Nrp1/Grb2/Myo1c/Add3/Vps4b/Arf6/Arpc2/Trim27/Gpsm2/Actr3/Drg1/Pfn1/Bag4/Nes/Cfl1/Dlg1	30
GO:0061136	BP	GO:0061136	regulation of proteasomal protein catabolic process	30/1480	195/28891	7.18284e-08	1.16089e-06	7.37714e-07	Ubb/Hspa1b/Stub1/Bcap31/Marchf7/Xpo1/Rnf19a/Csnk1e/Hspbp1/Bag5/Ankib1/Gna12/Plk1/Rnf144a/Rnf19b/Gsk3b/Bag2/Psen1/Psen2/Tmtc3/Eif3h/Usp5/Psme3/Eif2ak3/Usp7/Araf/Gipc1/Usp19/Dab2/Sco1	30
GO:0032506	BP	GO:0032506	cytokinetic process	13/1480	41/28891	7.2785e-08	1.17308e-06	7.45457e-07	Pdcd6ip/Rhoa/Stx2/Kif20b/Cep55/Arf1/Vps4b/Chmp5/Snx33/Plec/Myh9/Chmp1a/Vps4a	13
GO:0042407	BP	GO:0042407	cristae formation	9/1480	18/28891	7.57198e-08	1.21361e-06	7.71218e-07	Samm50/Chchd6/Chchd3/Immt/Micos13/Dnajc11/Afg3l1/Afg3l2/Adck1	9
GO:0046755	BP	GO:0046755	viral budding	9/1480	18/28891	7.57198e-08	1.21361e-06	7.71218e-07	Nedd4/Pdcd6ip/Tsg101/Vps37b/Mvb12a/Vps4b/Chmp5/Chmp1a/Vps4a	9
GO:0001837	BP	GO:0001837	epithelial to mesenchymal transition	27/1480	164/28891	7.69683e-08	1.23022e-06	7.81769e-07	Epha3/Flna/Tgfbr2/Sdcbp/Acvr1/Tgfbr1/Spred1/Gja1/Eng/Cul7/Vangl2/Gsk3b/Phldb2/Adipor1/Rtn4/Spred2/Aplf/Smad7/Ppp2ca/Phldb1/Tsc2/Dag1/Pdcd6/Spry2/Dab2/Alx1/Mcrip1	27
GO:0060562	BP	GO:0060562	epithelial tube morphogenesis	47/1480	395/28891	7.73741e-08	1.2333e-06	7.83725e-07	Plxnd1/Notch2/Plxnb2/Ddr1/Tgfbr2/Mmp14/Acvrl1/Acvr1/Met/Mib1/Gja1/Rala/Eng/Lrp5/Gna13/Epha7/Pdgfra/Sema4c/Cd44/Rhoa/Prkacb/Vangl2/Slc12a2/Hs2st1/Mthfd1l/Rhob/Luzp1/Lgr4/Kif20b/Psen1/Nrp1/Tmtc3/Tmed2/Ilk/Lzts2/Bsg/Kdm2a/Scrib/Ppp1ca/Pfn1/Tsc2/Dag1/Spry2/Pax3/Alx1/Cfl1/Dlg1	47
GO:0048589	BP	GO:0048589	developmental growth	80/1480	842/28891	8.475e-08	1.34715e-06	8.56078e-07	Plxna1/Bmpr2/Notch2/Nrp2/Nedd4l/Ptprs/Ddr2/Ddr1/Tgfbr2/Gpd2/Syt4/Bmpr1a/Tgfbr1/Atrn/Plxna4/Gja1/Ezr/Epha7/Insr/Sh3pxd2b/Pdgfra/Itgb1/Igf1r/Sema4c/Fkbp8/Evc/Sema6a/Gpat4/Vangl2/Add1/Slc12a2/Gsk3b/Acvr2b/Ryk/Dnm2/Rbm10/Ptpn11/Cyfip1/Wdtc1/Nrp1/Sox10/Dbnl/Plaa/Rtn4/Trpv2/Lrp4/Dbn1/Tmtc3/Efna5/Gnas/Tmed2/Pin1/Ilk/Lzts2/Cdk1/Smad7/Myh10/Kdm2a/Eif4h/Fzd7/Slc23a2/Actr3/Prkar1a/Plekha1/Ist1/Mapk1/Plec/Rp…	80
GO:0008053	BP	GO:0008053	mitochondrial fusion	12/1480	35/28891	8.67755e-08	1.37557e-06	8.74136e-07	Tfrc/Vat1/Chchd3/Bax/Mtch2/Fis1/Afg3l1/Miga2/Stoml2/Afg3l2/Adck1/Usp30	12
GO:0043162	BP	GO:0043162	ubiquitin-dependent protein catabolic process via the multivesicular body sorting pathway	11/1480	29/28891	9.0357e-08	1.42843e-06	9.07728e-07	Stam/Nedd4/Tsg101/Ptpn23/Vps28/Vps37b/Plaa/Vps4b/Chmp5/Chmp1a/Vps4a	11
GO:0032869	BP	GO:0032869	cellular response to insulin stimulus	32/1480	219/28891	9.18241e-08	1.44767e-06	9.19953e-07	Ptpra/Ptprf/Atp2b1/Insr/Igf1r/Srebf1/Rab10/Cdk2/Gsk3b/Srsf3/Snx5/Ptpn11/Adipor1/Cyfip1/Wdtc1/Ptpn1/Raf1/Grb2/Rab8a/Myo1c/Rab31/Map2k1/Eprs1/Myo5a/Prkaa1/Rab13/Mapk1/Tsc2/Shc1/Sco1/H2az1/Uso1	32
GO:0006412	BP	GO:0006412	translation	74/1480	759/28891	9.37735e-08	1.47065e-06	9.34558e-07	Plxnb2/Bzw1/Iars1/Eif2b1/Guf1/Gcn1/Eif4b/Farsa/Mrpl16/Magoh/Mrpl39/Erbb2/Dapk3/Ltn1/Cyfip1/Bzw2/Mrps23/Cnbp/Qki/Tyms/Uqcc2/Slc35a4/Eif3h/Pdf/Mrpl4/Eprs1/Tmed2/Rpl10a/Mrpl12/Exosc9/Rpl8/Eif2ak3/Rps27a/Rpl7a/Exosc5/Eif4h/Mars1/Scrib/Eefsec/Ppp1ca/Rars1/Mrpl45/Nhlrc3/Exosc7/Cnot9/Drg1/Mapk1/Dap3/Rps21/Mrpl10/Rpl4/Mrps9/Tarbp2/Mrps7/Mrps10/Rplp1/Eif5a/Mrpl14/Mrpl40/Eif4e2/Eif1/Aimp1/Mrpl46/Vim/Eef1e1…	74
GO:2001234	BP	GO:2001234	negative regulation of apoptotic signaling pathway	35/1480	253/28891	9.37902e-08	1.47065e-06	9.34558e-07	Marchf7/Acvr1/Tgfbr1/Vdac2/Bag5/Ivns1abp/Unc5b/Cd44/Gsk3b/Bax/Ppia/Trim32/Nle1/Sgk3/Ndufs3/Psen1/Nrp1/Fyn/Ptpn1/Raf1/Psen2/Ackr3/Rffl/Map2k1/Psme3/Dnaja1/Zc3hc1/Tpt1/Ndufa13/Itga6/Hmox1/Tmbim6/Armc10/Dab2/Birc6	35
GO:0051028	BP	GO:0051028	mRNA transport	22/1480	116/28891	9.41518e-08	1.47233e-06	9.35625e-07	Xpo1/Nup210/Pom121/Aaas/Nup188/Ndc1/Magoh/Magohb/Nup93/Srsf3/Qki/Ncbp3/Thoc2/Nup107/Thoc6/Nup43/Nup37/Hnrnpa3/Cetn2/Ythdc1/Ddx19a/Thoc3	22
GO:0048280	BP	GO:0048280	vesicle fusion with Golgi apparatus	7/1480	10/28891	9.55846e-08	1.49071e-06	9.47303e-07	Vamp7/Sec22b/Vti1a/Vti1b/Yipf5/Yipf4/Uso1	7
GO:0010506	BP	GO:0010506	regulation of autophagy	39/1480	300/28891	9.66988e-08	1.50403e-06	9.55769e-07	Tmem59/Scfd1/Sptlc1/Ralb/Irgm1/Fkbp8/Srebf1/Klhl22/Sec22b/Gsk3b/Bag3/Tom1/Vdac1/Stk38l/Trim32/Atp6v0a1/Sptlc2/Rab8a/Npc1/Sqstm1/Rragc/Map2k1/Prkaa1/Trim27/Trim21/Cisd1/Rraga/Slc7a5/Hmox1/Soga3/Ormdl3/Usp30/Cisd2/Pik3c3/Flcn/Fbxl2/Tsc2/Tpcn1/Ambra1	39
GO:0051170	BP	GO:0051170	import into nucleus	29/1480	187/28891	9.88182e-08	1.52883e-06	9.71526e-07	Flna/Chp1/Tnpo1/Ipo5/Ipo7/Cse1l/Tnpo3/Tnfrsf1a/Pom121/Nup188/Ipo11/Ipo9/Rab18/Bag3/Nup93/Mavs/Psen1/Sqstm1/Cdk1/Ipo8/Kpna2/Nup107/Mapk1/Kpna3/Ubr5/Tsc2/Cfl1/Atf2/Nup153	29
GO:0006405	BP	GO:0006405	RNA export from nucleus	19/1480	89/28891	9.88214e-08	1.52883e-06	9.71526e-07	Xpo1/Pom121/Xpo5/Nup188/Xpot/Magoh/Magohb/Nup93/Srsf3/Ncbp3/Rae1/Phax/Thoc2/Nup107/Thoc6/Ythdc1/Ddx19a/Thoc3/Nup153	19
GO:0006835	BP	GO:0006835	dicarboxylic acid transport	20/1480	98/28891	1.01239e-07	1.55789e-06	9.89998e-07	Lrrc8a/Syt4/Abcc5/Gja1/Slc38a2/Slc25a10/Itgb1/Stxbp1/Lrrc8d/Slc12a2/Slc25a32/Lrrc8c/Slc16a1/Slc1a5/Psen1/Slc25a11/Myo6/Arl6ip1/Gipc1/Septin2	20
GO:0031123	BP	GO:0031123	RNA 3'-end processing	20/1480	98/28891	1.01239e-07	1.55789e-06	9.89998e-07	Cpsf1/Ints6/Wdr33/Larp7/Fbl/Cpsf2/Exosc9/Exosc5/Ints5/Ahcyl1/Exosc7/Virma/Rps21/Exosc6/Rbfox2/Ythdc1/Paf1/Cdc73/Polr2d/Ptcd1	20
GO:0061061	BP	GO:0061061	muscle structure development	74/1480	761/28891	1.04138e-07	1.59826e-06	1.01565e-06	Bmpr2/Erbb3/Mmp14/Acvr1/Met/Bmpr1a/Tgfbr1/Atp2a2/Gja1/Kit/Neo1/Eng/Atp11a/Pld3/Pdgfra/Itgb1/Sort1/Sema4c/Ehd1/Rhoa/Vangl2/Flnb/Gsk3b/Naglu/Flot2/Trim32/Bnip2/Rbm10/Myof/Pdlim7/Boc/Coprs/Frs2/Flii/Qki/Uqcc2/Gpc1/Tmtc3/Vrk3/Fkbp1a/Pin1/Ilk/Prkaa1/Smarcc2/Myh14/Acadm/Megf10/Smad7/Nr2f2/Myh10/Tmod3/Acta1/Emd/Fzd7/Prkar1a/Plec/Myh9/Tarbp2/Afg3l2/Des/Eif5a/Usp19/Dag1/Prr14/Myl6/G6pdx/Smarcb1/Ttn/Pax3/M…	74
GO:0046467	BP	GO:0046467	membrane lipid biosynthetic process	24/1480	136/28891	1.04757e-07	1.6035e-06	1.01898e-06	Tm9sf2/Smpd4/Cers2/Sptlc1/Ugcg/Agk/Pigs/St3gal6/Pigt/Pign/Sptlc2/Pigk/Cers5/Pigg/Smpd2/Gpaa1/Sccpdh/Dpm1/St6galnac4/St3gal4/Ormdl3/Degs1/Pigu/Hacd3	24
GO:0038129	BP	GO:0038129	ERBB3 signaling pathway	8/1480	14/28891	1.05953e-07	1.61753e-06	1.02789e-06	Erbb3/Map2k2/Erbb2/Raf1/Grb2/Rtn4/Map2k1/Mapk1	8
GO:0009725	BP	GO:0009725	response to hormone	77/1480	804/28891	1.07323e-07	1.63414e-06	1.03845e-06	Epha3/Ptpra/Mmp14/Ptprf/Atp1a1/Atp2b1/Stxbp3/Tgfbr1/Atp2a2/Kit/Ugcg/Insr/Adam9/Igf1r/Lnpep/Sort1/Nedd4/Srsf5/Srebf1/Eif2b1/Rab10/Rhoa/Cdk2/Gsk3b/Adcy6/Ass1/Srsf3/Acsbg1/Tyk2/Snx5/Ptpn11/Adipor1/Rac1/Cyfip1/Wdtc1/Ptpn1/Raf1/Akap8/Grb2/Rab8a/Npc1/Myo1c/Strn3/Rab31/Anxa5/Stk39/Map2k1/Efna5/Gnas/Rdx/Eprs1/Myo5a/Prkaa1/Tfap4/Stat1/Dnaja1/Jak1/Ahcyl1/Mat2a/Prkar1a/Rab13/Cnot9/Hmox1/Mapk1/Rbfox2/Ubr5/Id…	77
GO:0006626	BP	GO:0006626	protein targeting to mitochondrion	18/1480	81/28891	1.11693e-07	1.69622e-06	1.0779e-06	Bcap31/Samm50/Timm23/Tomm40/Agk/Hspa4/Srebf1/Mtch1/Tomm22/Aifm1/Bag3/Timm17a/Mtch2/Timm29/Fis1/Prkaa1/Ndufa13/Bag4	18
GO:0006487	BP	GO:0006487	protein N-linked glycosylation	16/1480	65/28891	1.24039e-07	1.87876e-06	1.1939e-06	Alg2/Stt3a/Gfpt1/Ddost/Dhdds/Mlec/Mgat5/Rpn1/B4galt7/Nus1/Alg5/Dpm1/Rpn2/Mgat4b/Krtcap2/Ostc	16
GO:0051336	BP	GO:0051336	regulation of hydrolase activity	89/1480	981/28891	1.28861e-07	1.94671e-06	1.23708e-06	Plxna1/Epha3/Hspa1b/Plxnd1/Plxnb2/Bcap31/Chp1/Plxna2/Met/Plxnb1/Plxna4/Ppp6r1/Tmed10/Tbc1d15/Gna13/Asph/Epha7/Gna12/Pdgfra/Itgb1/Sort1/Eif2b1/Pkp4/Arf4/Mtch1/Cd44/Rhoa/Antxr1/Pcna/Rasal3/Mgat5/Gsk3b/Aifm1/Bax/Ncstn/Lrch1/Erbb2/Nle1/Rhoc/Gnaq/Ppp6r3/Mtch2/Arhgap1/Fis1/Sipa1/Fyn/Arfgef1/Sipa1l1/Plaa/Rffl/Psma3/Arhgap42/Vrk3/Map2k1/Efna5/Gnas/Dnajb6/Dnaja3/Rdx/Tmed2/Pin1/Arl6ip1/Tfap4/Pdcd2/Psme3/St…	89
GO:0000165	BP	GO:0000165	MAPK cascade	78/1480	822/28891	1.29626e-07	1.95316e-06	1.24118e-06	Notch2/Itch/Rnf149/Rell1/Met/Tgfbr1/Spred1/Kit/Ezr/Epha7/Insr/Adam17/Pdgfra/Adam9/Igf1r/Setx/Sema4c/Cd44/Sema6a/Lamtor1/Vangl2/Atp6ap2/Map2k2/Gsk3b/Sorbs3/Tnfrsf19/Tab1/Ppia/Ryk/Erbb2/Bnip2/Ptpn11/Psen1/Frs2/Rac1/Nrp1/Ptpn1/Prmt5/Raf1/Rras/Nbr1/Grb2/Ackr3/Sirpa/Vrk3/Spred2/Stk39/Rap2a/Map2k1/Pin1/Ilk/Atp6v0c/Dstyk/Stk38/Dnaja1/Map2k7/Tlr3/Acta2/Cib1/Vrk2/Rap1a/Mapk1/Araf/Myh9/Flcn/Tsc2/Dag1/Spry2…	78
GO:0071526	BP	GO:0071526	semaphorin-plexin signaling pathway	14/1480	50/28891	1.32909e-07	1.99743e-06	1.26931e-06	Plxna1/Flna/Plxnd1/Nrp2/Plxnb2/Plxna2/Met/Plxnb1/Plxna4/Sema4c/Sema6a/Rac1/Nrp1/Arhgdia	14
GO:0051489	BP	GO:0051489	regulation of filopodium assembly	15/1480	58/28891	1.51402e-07	2.26946e-06	1.44218e-06	Myo10/Daam2/Tgfbr1/Rala/Rab5a/Capzb/Rac1/Nrp1/Palm/Stau2/Dbn1/Arf6/Arpc2/Actr3/Gpm6a	15
GO:0031396	BP	GO:0031396	regulation of protein ubiquitination	31/1480	213/28891	1.58823e-07	2.37455e-06	1.50896e-06	Ubb/Stub1/Marchf7/Chp1/Arrdc3/Ndfip1/Tgfbr1/Hspbp1/Bag5/Plk1/Ivns1abp/Wbp1l/Gsk3b/Ppia/Vps28/Cul3/Bag2/Psen1/Fyn/Psen2/Plaa/Sqstm1/Dnaja3/Pin1/Usp4/Dnaja1/Smad7/Gnl3l/Pdcd6/Spry2/Skp1	31
GO:0010717	BP	GO:0010717	regulation of epithelial to mesenchymal transition	20/1480	101/28891	1.70741e-07	2.54615e-06	1.61801e-06	Epha3/Tgfbr2/Sdcbp/Acvr1/Tgfbr1/Spred1/Eng/Phldb2/Adipor1/Spred2/Aplf/Smad7/Ppp2ca/Phldb1/Tsc2/Dag1/Spry2/Dab2/Alx1/Mcrip1	20
GO:0043043	BP	GO:0043043	peptide biosynthetic process	75/1480	785/28891	1.72698e-07	2.56872e-06	1.63235e-06	Plxnb2/Bzw1/Ggt7/Iars1/Eif2b1/Guf1/Gcn1/Eif4b/Farsa/Mrpl16/Magoh/Mrpl39/Erbb2/Dapk3/Ltn1/Cyfip1/Bzw2/Mrps23/Cnbp/Qki/Tyms/Uqcc2/Slc35a4/Eif3h/Pdf/Mrpl4/Eprs1/Tmed2/Rpl10a/Mrpl12/Exosc9/Rpl8/Eif2ak3/Rps27a/Rpl7a/Exosc5/Eif4h/Mars1/Scrib/Eefsec/Ppp1ca/Rars1/Mrpl45/Nhlrc3/Exosc7/Cnot9/Drg1/Mapk1/Dap3/Rps21/Mrpl10/Rpl4/Mrps9/Tarbp2/Mrps7/Mrps10/Rplp1/Eif5a/Mrpl14/Mrpl40/Eif4e2/Eif1/Aimp1/Mrpl46/Vim/E…	75
GO:0031623	BP	GO:0031623	receptor internalization	25/1480	150/28891	1.80904e-07	2.68388e-06	1.70553e-06	Itch/Hgs/Sdcbp/Tfrc/Rala/Ralb/Ezr/Ankrd13a/Vac14/Insr/Itgb1/Nedd4/Rab5a/Dnm2/Atad1/Snx1/Arf1/Scyl2/Grb2/Ackr3/Myo6/Rab31/Scrib/Dab2/Pard3	25
GO:0006513	BP	GO:0006513	protein monoubiquitination	15/1480	59/28891	1.93438e-07	2.85709e-06	1.8156e-06	Ubb/Itch/Nedd4l/Marchf7/Mgrn1/Nedd4/Tsg101/Klhl22/Cul3/Dtl/Cul1/Trim21/Fbxl2/Pdcd6/Skp1	15
GO:0006606	BP	GO:0006606	protein import into nucleus	28/1480	182/28891	1.93632e-07	2.85709e-06	1.8156e-06	Flna/Chp1/Tnpo1/Ipo5/Ipo7/Cse1l/Tnpo3/Tnfrsf1a/Pom121/Nup188/Ipo11/Ipo9/Bag3/Nup93/Mavs/Psen1/Sqstm1/Cdk1/Ipo8/Kpna2/Nup107/Mapk1/Kpna3/Ubr5/Tsc2/Cfl1/Atf2/Nup153	28
GO:0042438	BP	GO:0042438	melanin biosynthetic process	10/1480	25/28891	1.94555e-07	2.85709e-06	1.8156e-06	Atp7a/Tyrp1/Dct/Pmel/Slc45a2/Rab38/Tyr/Slc24a5/Myo5a/Gipc1	10
GO:1902410	BP	GO:1902410	mitotic cytokinetic process	10/1480	25/28891	1.94555e-07	2.85709e-06	1.8156e-06	Pdcd6ip/Rhoa/Stx2/Kif20b/Cep55/Arf1/Vps4b/Chmp5/Chmp1a/Vps4a	10
GO:0032272	BP	GO:0032272	negative regulation of protein polymerization	18/1480	84/28891	2.00938e-07	2.93853e-06	1.86735e-06	Ssh1/Vdac2/Capza2/Capza1/Tbcd/Add1/Capzb/Cracd/Sptbn1/Arfgef1/Sptan1/Flii/Add3/Rdx/Arpc2/Tmod3/Pfn1/Cfl1	18
GO:0032509	BP	GO:0032509	endosome transport via multivesicular body sorting pathway	11/1480	31/28891	2.01116e-07	2.93853e-06	1.86735e-06	Stam/Sort1/Ptpn23/Vps28/Laptm4b/Mvb12a/Vps4b/Chmp5/Chmp1a/Vta1/Vps4a	11
GO:0060840	BP	GO:0060840	artery development	22/1480	121/28891	2.04722e-07	2.98368e-06	1.89605e-06	Plxnd1/Bmpr2/Tgfbr2/Acvrl1/Ephb4/Bmpr1a/Tgfbr1/Gaa/Ldlr/Eng/Snx17/Naglu/Tab1/Acvr2b/Luzp1/Dnm2/Apob/Nrp1/Rtn4/Smad7/Myh10/Chd7	22
GO:0060322	BP	GO:0060322	head development	73/1480	762/28891	2.26953e-07	3.29938e-06	2.09666e-06	Tubb2b/Ubb/Plxna1/Flna/Unc5c/Nrp2/Plxnb2/Ptprs/Atp7a/Tgfbr2/Mmp14/Slc4a7/Stxbp3/Plxna2/Met/Bmpr1a/Dct/Atrn/Plxna4/Napa/Aplp2/Asph/Epha7/Tyro3/Pdgfra/Itgb1/Igf1r/Tra2b/Adgrg1/Sema4c/Abcb6/Rhoa/Atp6ap2/Map2k2/Gsk3b/Naglu/Bax/Uqcrq/Ryk/Wls/Gnaq/Ptpn11/Psen1/Gnpat/Frs2/Rac1/Nrp1/Fyn/Raf1/Rras/Psen2/Scyl2/Rtn3/Rtn4/Arcn1/Map2k1/Nr2f2/Myh10/Scrib/Plekha1/Mapk1/Rbfox2/Fbxw11/Ttn/Atf2/Gak/Nr2c2/Hook3/Pom…	73
GO:0010810	BP	GO:0010810	regulation of cell-substrate adhesion	32/1480	228/28891	2.35402e-07	3.41362e-06	2.16926e-06	Epha3/Flna/Ptpra/Ddr1/Mmp14/Acvrl1/Itgb1/Rhoa/Gsk3b/Phldb2/Dapk3/Dnm2/Ptpn11/Rhod/Triobp/Rac1/Nrp1/Coro2b/Rras/Dbn1/Efna5/Ilk/Arpc2/Hsd17b12/Fzd7/Cib1/Itga6/Myh9/Dag1/Dab2/Map4k4/Cfl1	32
GO:0042158	BP	GO:0042158	lipoprotein biosynthetic process	20/1480	103/28891	2.38994e-07	3.45705e-06	2.19686e-06	Zdhhc20/Ugcg/Pigs/Irgm1/Zdhhc15/Pigt/Pign/Apob/Pigk/Pigg/Gpaa1/Zdhhc13/Golga7/Ppm1b/Nmt2/Dpm1/Zdhhc9/Pik3c3/Pigu/Nmt1	20
GO:0030837	BP	GO:0030837	negative regulation of actin filament polymerization	16/1480	68/28891	2.43207e-07	3.50049e-06	2.22447e-06	Ssh1/Capza2/Capza1/Add1/Capzb/Cracd/Sptbn1/Arfgef1/Sptan1/Flii/Add3/Rdx/Arpc2/Tmod3/Pfn1/Cfl1	16
GO:0062237	BP	GO:0062237	protein localization to postsynapse	16/1480	68/28891	2.43207e-07	3.50049e-06	2.22447e-06	Adam10/Neto2/Vps35/Zdhhc15/Sacm1l/Gsk3b/Erbb2/Rapsn/Rab8a/Snap47/Map2k1/Clstn1/Scrib/Rap1a/Dag1/Dlg1	16
GO:0051047	BP	GO:0051047	positive regulation of secretion	49/1480	437/28891	2.57028e-07	3.69023e-06	2.34504e-06	Hgs/Vamp7/Acvr2a/Sdcbp/Stxbp2/Stam/Syt4/Gja1/Tmed10/Vps35/Slc4a8/Acsl3/Adam9/Stxbp1/Pdcd6ip/Tsg101/Tm7sf3/Rab34/Kif5b/Rab5a/Slc12a2/Ptpn23/Gna11/Ppia/Tmem132a/Rab8b/Wls/Gnaq/Ptpn11/Arf1/Rac1/Rtn4/Psmd9/Gnas/Myo18a/Vps4b/Arf6/Bsg/Myh10/Prkar1a/Rhbdd1/Exoc2/Myh9/Aimp1/Vps4a/Dab2/Ttn/Frmd4a/Golph3	49
GO:0051017	BP	GO:0051017	actin filament bundle assembly	27/1480	174/28891	2.66465e-07	3.81118e-06	2.4219e-06	Flna/Met/Tgfbr1/Ezr/Sh3pxd2b/Rhoa/Add1/Tjp1/Sorbs3/Phldb2/Cul3/Rhoc/Zyx/Fam171a1/Cald1/Rhod/Rac1/Nrp1/Coro2b/Dbn1/Lima1/Rdx/Myh10/Myh9/Pfn1/Bag4/Cfl1	27
GO:0043408	BP	GO:0043408	regulation of MAPK cascade	72/1480	751/28891	2.66769e-07	3.81118e-06	2.4219e-06	Notch2/Itch/Rnf149/Rell1/Met/Tgfbr1/Spred1/Kit/Ezr/Epha7/Insr/Adam17/Pdgfra/Adam9/Igf1r/Sema4c/Cd44/Sema6a/Lamtor1/Vangl2/Atp6ap2/Map2k2/Gsk3b/Sorbs3/Tnfrsf19/Tab1/Ppia/Ryk/Erbb2/Bnip2/Ptpn11/Psen1/Frs2/Rac1/Nrp1/Ptpn1/Prmt5/Raf1/Rras/Nbr1/Grb2/Ackr3/Sirpa/Vrk3/Spred2/Stk39/Rap2a/Map2k1/Pin1/Ilk/Atp6v0c/Dstyk/Stk38/Dnaja1/Map2k7/Tlr3/Acta2/Cib1/Vrk2/Rap1a/Mapk1/Myh9/Flcn/Tsc2/Dag1/Spry2/Shc1/Nelf…	72
GO:0045927	BP	GO:0045927	positive regulation of growth	40/1480	324/28891	2.68126e-07	3.82113e-06	2.42822e-06	Bmpr2/Nedd4l/Mmp14/Sdcbp/Syt4/Bmpr1a/Tgfbr1/Adam10/Ezr/Insr/Adam17/Sh3pxd2b/Igf1r/Klhl22/Rhoa/Gsk3b/Trim32/Erbb2/Cyfip1/Nrp1/Dbnl/Plaa/Trpv2/Dbn1/Efna5/Pin1/Ilk/Exosc9/Cdk1/Smad7/Slc23a2/Cib1/Ist1/Mapk1/Rpl4/Armc10/Smarcb1/Cfl1/Dlg1/Chd7	40
GO:0031032	BP	GO:0031032	actomyosin structure organization	31/1480	218/28891	2.6902e-07	3.82445e-06	2.43033e-06	Met/Tgfbr1/Sh3pxd2b/Pdgfra/Itgb1/Pdcd6ip/Rhoa/Tjp1/Sorbs3/Phldb2/Epb41/Cul3/Rhoc/Zyx/Fam171a1/Rac1/Nrp1/Coro2b/Flii/Myo18a/Myh14/Myh10/Tmod3/Cdc42bpb/Acta1/Prkar1a/Plec/Myh9/Pfn1/Bag4/Ttn	31
GO:0009895	BP	GO:0009895	negative regulation of catabolic process	42/1480	349/28891	2.75063e-07	3.90062e-06	2.47874e-06	Flna/Usp8/Marchf7/Scfd1/Vps35/Bag5/Snx3/Klhl22/Snx12/Sec22b/Stk38l/Tmem132a/Thrap3/Laptm4b/Rbm10/Psen1/Mtch2/Lrig2/Fyn/Psen2/Qki/Npc1/Eif3h/Rragc/Pin1/Prkaa1/Trim27/Phax/Sf3b3/Taf15/Usp7/Fus/Rraga/Slc7a5/Hmox1/Gipc1/Usp30/Flcn/Ppp2ca/Usp19/Tsc2/Sco1	42
GO:0044000	BP	GO:0044000	movement in host	22/1480	123/28891	2.75727e-07	3.90062e-06	2.47874e-06	Slc3a2/Ifitm3/Ifitm2/Insr/Snx3/Tsg101/Nectin3/Vps37b/Nrp1/Trim59/Npc1/Vapb/Vps4b/Chmp5/Bsg/Trim21/Ist1/Exoc2/Ctsb/Chmp1a/Tpcn1/Vps4a	22
GO:0046847	BP	GO:0046847	filopodium assembly	17/1480	77/28891	2.76531e-07	3.90246e-06	2.4799e-06	Myo10/Daam2/Tgfbr1/Rala/Ezr/Rab5a/Capzb/Rac1/Nrp1/Palm/Stau2/Dbn1/Arf6/Arpc2/Actr3/Itga6/Gpm6a	17
GO:1903649	BP	GO:1903649	regulation of cytoplasmic transport	11/1480	32/28891	2.92268e-07	4.11451e-06	2.61466e-06	Ezr/Snx3/Map2k2/Snx12/Ptpn23/Map2k1/Rdx/Usp7/Mapk1/Dab2/Rab21	11
GO:0051204	BP	GO:0051204	protein insertion into mitochondrial membrane	10/1480	26/28891	3.01609e-07	4.22603e-06	2.68552e-06	Samm50/Tomm40/Agk/Hspa4/Mtch1/Tomm22/Bax/Mtch2/Timm29/Ndufa13	10
GO:0042440	BP	GO:0042440	pigment metabolic process	16/1480	69/28891	3.0165e-07	4.22603e-06	2.68552e-06	Atp7a/Tyrp1/Dct/Pmel/Snx3/Slc45a2/Rab38/Abcb6/Tyr/Abcb7/Hmox2/Slc24a5/Pgrmc1/Myo5a/Hmox1/Gipc1	16
GO:0043244	BP	GO:0043244	regulation of protein-containing complex disassembly	23/1480	134/28891	3.22021e-07	4.50052e-06	2.85996e-06	Asph/Insr/Igf1r/Setx/Capza2/Irgm1/Capza1/Add1/Capzb/Tom1/Cracd/Sptbn1/Sptan1/Flii/Add3/Lima1/Rdx/Arpc2/Tmod3/Cib1/Eif5a/Nes/Cfl1	23
GO:0150115	BP	GO:0150115	cell-substrate junction organization	20/1480	105/28891	3.31458e-07	4.62124e-06	2.93667e-06	Epha3/Ptpra/Mmp14/Acvrl1/Ptprk/Phldb2/Rab8b/Dapk3/Ptpn11/Rhod/Rac1/Nrp1/Coro2b/Efna5/Arf6/Plec/Myh9/Pip5k1a/Map4k4/Cfl1	20
GO:0050931	BP	GO:0050931	pigment cell differentiation	12/1480	39/28891	3.36022e-07	4.67361e-06	2.96995e-06	Tyrp1/Kit/Mreg/Rab38/Gna11/Gnaq/Slc24a5/Rab32/Sox10/Mitf/Ap1m1/Myo5a	12
GO:0001525	BP	GO:0001525	angiogenesis	58/1480	561/28891	3.41888e-07	4.74381e-06	3.01456e-06	Flna/Plxnd1/Notch2/Nrp2/Hgs/Tgfbr2/Ptprm/Acvrl1/Ephb4/Acvr1/Apold1/Bmpr1a/Tgfbr1/Spred1/Tnfrsf1a/Eng/Gna13/Pdgfra/Itgb1/Adgrg1/Unc5b/Sema6a/Rhoa/Adamts1/Vangl2/Add1/Slc12a2/Atp5f1b/Tjp1/Nus1/Rhoj/Mcam/Rhob/Cald1/Nrp1/Rras/Rtn4/Ackr3/Rnh1/Vps4b/Pgk1/Stat1/Bsg/Jak1/Eif2ak3/Tlr3/Hk2/Cib1/Hmox1/Sparc/Myh9/Flcn/Amotl1/Pdcd6/Spry2/Shc1/Aimp1/Atf2	58
GO:0050773	BP	GO:0050773	regulation of dendrite development	24/1480	145/28891	3.60913e-07	4.99579e-06	3.17469e-06	Nedd4l/Ptprd/Vamp7/Ptprf/Met/Nedd4/Cul7/Rhoa/Zdhhc15/Gsk3b/Wls/Cyfip1/Dbnl/Sipa1l1/Cux2/Stau2/Dbn1/Rap2a/Ilk/Arf6/Tmem106b/Actr3/Rab21/Cyth2	24
GO:1903828	BP	GO:1903828	negative regulation of protein localization	33/1480	244/28891	3.67239e-07	5.07124e-06	3.22263e-06	Nedd4l/Tmem59/Chp1/Syt4/Wwp2/Ndfip1/Vps35/Neo1/Ankrd13a/Snx3/Srebf1/Ppp2r5a/Snx12/Gsk3b/Abhd17b/Bag3/Ptpn11/Coro2b/Abhd17c/Abhd17a/Psmd9/Anxa5/Tmed2/Arf6/Snx33/Lzts2/Dnaja1/Flcn/Bag4/Dab2/Map4k4/Sapcd2/Frmd4a	33
GO:0030307	BP	GO:0030307	positive regulation of cell growth	30/1480	210/28891	3.76809e-07	5.19099e-06	3.29873e-06	Bmpr2/Nedd4l/Mmp14/Sdcbp/Syt4/Tgfbr1/Adam10/Adam17/Klhl22/Rhoa/Gsk3b/Trim32/Erbb2/Cyfip1/Nrp1/Dbnl/Plaa/Trpv2/Dbn1/Efna5/Pin1/Ilk/Exosc9/Smad7/Slc23a2/Cib1/Ist1/Rpl4/Smarcb1/Cfl1	30
[truncated: 1,972 more rows]
