# Supplementary material for: Cancer cells impede T cell early activation and drive immune evasion by transferring Tmem176b
Source: Research Square preprint supplement (doi:10.21203/rs.3.rs-6199894/v1), 2025-07-07
Supplement: Supplementary file 5 [file Supplementary Table_3_scRNA cluster annoation.xlsx]

## Sheet: All cluster-Exo PBS exp
cluster	cell type	cell markers
0	ILC1	Gzma	Eomes	Klrc2	Klrc1	Klrd1	Cd160	Ctsw	Xcl1	Tbx21	Il2rb	Ncr1	Prf1	Klrb1c	Klrk1	Klra9	Itga2	Cd226	Gzmb	Klra8
1	ILC3	Gzma	Eomes	Klrc2	Klrc1	Klrd1	Ctsw	Xcl1	c-kit	Prf1	Klrb1c	Klrk1	Klra9	Klrb1b	Klra8	Rora	Il2rb
2	CD8+T	Cd3d	Cd3e	Cd3g	Cd8a	Cd8b1	Cd247	Klrc2	Klrc1	Cd160	Ctsw	Trac	Trbc1	Trbc2	Icos	Themis	Lat	Bcl11b	Gzmb	Nkg7	Cxcr3	Tbx21
3	Monocyte	S100a4	Ccr2	Lyz2	Vcan	Bst2	Cd40	Csf1r	Sod2	Msr1	Cxcl10	Itgam	Ly6c2	Clec4e	Tl2	Cd14	Adgre1	Fcgr1	Clec4d	Il1b
4	B cell	Cd19	Ms4a1	Cd79a	Cd79b	Bank1	Pax5	Ebf1	Scd1	Vpreb3	Igkc	Ighm	Iglc3	Iglc1	Iglc2	Ighd	Pou2af1	Fcer2a
5	NKT	Cd3d	Cd3e	Cd3g	Cd160	Klrd1	Klrc2	Ctsw	Xcl1	Trac	Trbc2	Klra1	Klra7	Kcnj8	Cd2
6	Macrophage	S100a4	Cd14	Ccr2	Lyz2	Vcan	Basp1	Bst2	Cd40	Csf1r	Sod2	Msr1	Il1b	C1qa	C1qb	C1qc	Itgam	Clec4e	Cd14	Adgre1	Fcgr1	Clec4d
7	CD4+T	Cd3d	Cd3e	Cd3g	Cd2	Cd4	Cd247	Trac	Rora	Trbc1	Trbc2	Icos	Themis	Lat	Bcl11b
8	cDC2	S100a4	Ccr2	Basp1	Cd209a	Cd40	Csf1r	Sod2	Il1b	Clec10a	Pld4	Flt3	CD83	Tcf4	Tyrobp	Sirpa	Tmem176b	Zbtb46	Irf4	Il1r2	Mgl2
9	Treg	Ctla4	Foxp3	Il2ra	Cd4	Cd3d	Cd3e	Cd3g	Trac	Rora	Trbc2	Gzmb	Cd247	Icos	Lat	Tnfrsf4	Tnfrsf9	Bcl11b
10	NK	Gzma	Eomes	Klrc2	Klrd1	Ctsw	Klrb1c	Klrk1	Ncr1	Prf1	Gzmb	Il2rb	Klra8	Nkg7
11	Neutrophil	Csf3r	Basp1	Il1b	Cd14	S100a9	S100a8	Cxcl2	Retnlg	Cxcl3	Il1r2	Mmp9	Wfdc21	Clec4e	Slc7a11	Cd300lf	Cd300ld	Clec4d
12	pDC	Siglech	Bst2	Pld4	Ly6c2	Cd83	Il1b	Ly6d	Clec10a	Mpeg1	Tyrobp	Tcf4	Flt3	Irf8
13	cDC1	Clec9a	Xcr1	Wdfy4	Flt3	Cd24a	Pld4	Zbtb46	Batf3	Irf8	Mpeg1
14	gdT	Tcrg-C1	Tcrg-C2	CD247	Trdc	Trdv4	Cd3d	Cd3e	Cd3g	Lat	Tmem176b	Il7r	Rorc	Il1r1	Icos	Bcl11b	Cxcr6	Rora

## Sheet:  CD8 T cell-Exo PBS exp
cluster	cell type	cell markers
0	Innate-like CD8T	Klrc1	Klrc2	Klrk1	Zeb2	Prf1	Ifng	Gzmb	Gzma	Gzmk	Id2	Tbx21	Ccl5	Itga4	Cd44	Nkg7	Cd69	Ly6c2
1	Naive/central memory-like CD8T	Il7r	Tcf7	Id3	Bcl2	Sell	Il6ra	Lef1	Nsg2	Rps19	Rps27	Rplp1	Rpl13	Rpl23	Tmem108	Dapl1
2	Precursor exhausted CD8T	Myb	Il7r	Satb1	Lef1	Tcf7	Klf2	Sell	Zeb1	Il4ra	Rps19	Rps27	Rplp1	S1pr1
3	Intermediately exhausted CD8T	Pdcd1	Ctla4	Gzma	Gzmb	Gzmk	Il2rb	Gpr171	Gpr183	Cd27	Cxcr4	Klrc2	Klrc1	Icos	Cd44	Ccl5	Nkg7
4	Exhausted Effector CD8T	Lag3	Tox	Ctla4	Pdcd1	Havcr2	Irf8	Id2	Zeb2	Prf1	Ifng	Gzmb	Eomes	Cd44	Nkg7	Il2rb
5	Memory-like CD8T	Lef1	Tcf7	Il7r	Sell	Nsg2	Satb1	Foxp1	Zeb1	Mcl1	S1pr1	Il6ra	Klf2	Ly6c1	Rps19	Rps27
6	IFN-stimulated CD8T	Ifng	Gzmb	Irf2	Irf7	Ifit1	Ifit3b	Ifi214	Ifi206	Isg15	Ifit3	Usp18	Isg20	Ifit1bl1	Ifi208	Cd44	Cd69	Ly6c2

## Sheet: CD8 T gene-Exo PBS exp
Early activation	Tpi1	Nr4a2	Eomes	Fkbp3	Pkm	Gpx4	Mrpl33	Mrpl52	Prdx5	Txn1	Cox7b	Uqcrb	Ldha	Mif	Dusp2	Sh2d1a	Pde4d
Effector_Cytokine	Gzma	Gzmb	Gzmk	Prf1	Nr4a2	Tnfrsf1b	Serpinb9	Serpinb6b	Irf7	Irf9	Pkm	Sema4a	Il2rb	Il2rg	Ccl5	Nkg7	Klrc1	Klrk1
Exhaustion	Pdcd1	Lag3	Tox	Fasl	Cd160	Cxcr6	Nfat5	Runx3	Ptpn22	Abcb1b	Slc16a6	Sh2d2a	Slamf7	Lgals3	Lgals1

## Sheet: B cell-Exo PBS  exp
Cluster	cell type	cell markers
0	memory_B	Satb1	Cd86	Cd83	H2-Ab1	H2-Aa	Hmgb2	Birc3
1	Naïve_B	Ighd	Cd38	Fcer2a	Cd69
2	GC_B	Cd27	Cd44	Ccr2	Cxcr3	Cxcr6	Ccr5	Myb	Ccl5	Rgs1	Hmgb2	Icam1	Ssbp3	Tox	Ly6c2	Pdcd1	Ctla4	Tnfrsf18	Fasl
3	IgM+PB	Iglc1	Ighm	Iglc2	Spib	Wfdc21
4	IgA+PC	Sdc1	Igha	Igkc	Jchain	Prdm1	Xbp1	Iglv1	Creb3l2	Ly6c2	Mzb1	Ssr4
5	Tim1_B	Havcr1	Cd83	Shisa8

## Sheet: B cell gene-Exo PBS exp
Exhaustion	Havcr1	Havcr2	Tigit	Pdcd1	Lag3	Entpd1	Nt5e	Il10	Cd274	Tnfrsf18	Btla	Pdcd1lg2	Ebi3	Cd38	Ahr	Fasl	Cd5	Cd22	Fcrl1	Adora2a	Ptprj	Clec2d	Ptpn6

## Sheet: Macrophage-Exo PBS exp
cluster	cell type	cell markers
0	Agio-TAMs/LA-TAMs	Tlr4	Arg1	Spp1	Vegfa	Adam8	Mif	Bnip3	Slc2a1	Cd36	Fabp5	Clec4d	Gpnmb	Cd63	Nos2	Cd274	Pf4	Inhba
1	IFN-TAMs	Cd74	Il6ra	Irf1	Csf1r	Ciita	Isg15	Cxcl9	Cxcl10	Stat1	Ifit3	Irf7	Stat2	Ifi47	Ifi30
2	HSP+TAMs	Cd74	Hspa1a	Hspa1b	Hsp90aa1	Hsp90ab1	Ifitm1	Ifitm2	Ifitm3
3	Inlam-TAMs	Cd74	Tlr2	Cd80	Csf1r	Nlrp3	Il1b	Mrc1	Rel	Nfkb1	Nr4a1	Nr4a3	Il1r2
4	Reg-TAMs/LA-TAMs	Cd63	C1qa	C1qb	C1qc	Pltp	Pparg	Il10rb	Mrc1	Clec10a	Ccl3	Trem2	Adgre1	Cd68	Apoe	Acp5	Lpl	Pf4	Timp2	Maf	Lipa	Folr2	Cd300ld
5	HSP+Monocytes	Hspa1a	Hspa1b	Hsp90aa1	Hsp90ab1	Dnajb1	Dnaja1	Il17ra	Sell	Cybb	Ncf2	Ifitm6	Ifi207	Notch2	Ahr	Ceacam1	Nr4a2	Itgal

## Sheet: All cluster-Tko Scr exp
cluster	cell type	cell markers
0	ILC3	Il2rb	Klrb1b	Klra8	Nudt4	Itga2	Ier5l	Fasl
1	CD8T	Cd3d	Cd3e	Cd3g	Cd8a	Cd8b1	Tcf7	Lef1	Lck	Icos	Lat	Fasl	Sh2d1a	Bcl11b	Nkg7	Ctsw	Cd247	Cxcr6	Ccl5	Trbc2	Themis	Thy1
2	ILC1	Cd160	Xcl1	Gzma	Ncr1	Klrd1	Klrb1c	Eomes	Ctsw	Klrk1	Klrc2	Tbx21	Thy1	Ptprc
3	Monocyte	Cd14	Ccr2	Lyz2	Icos	Itgam	Csf1r	Msr1	Tlr2	Fcgr1
4	Macrophage	Cd68	S100a4	C1qa	C1qb	C1qc	Vcan	Basp1	Il1b	Klrk1	Mpeg1	Itgam	Itgax	Csf1r	Adgre1	Tmem176b
5	Neutrophil	Retnlg	Csf3r	Mmp8	Mmp9	Cxcr2	Il1r2	Cxcl3	Clec4e	Slc7a11	Cxcr2	Cd300lf	Cd300ld
6	CD4T	Cd4	Bcl11b	Il7r	Cd247	Rora	Zap70	Cd40lg	Themis	Lat
7	NKT	Klra6	Kcnj8	Trac
8	B cell	Cd19	Ms4a1	Cd79a	Cd79b	Vpreb3	Bank1	Pax5	Ebf1	Scd1	Iglc1	Iglc2	Ighd	Pou2af1	Fcer2a
9	Treg	Foxp3	Ctla4	Il2ra	Cd247	Tnfrsf4	Tnfrsf18	Rora	Trac	Lat
10	gdT	Lck	Tcrg-C2	Tcrg-C4	Klra6
11	DC	Cd4	Ly6d	Bst2	Siglech	Ly6c2	Clec9a	Cox6a2	Irf8	Flt3	Tlr7	Pld4

## Sheet:  CD8 T cell-Tko Scr exp
Cluster	cell type	cell markers
0	Precursor exhausted CD8T	Tcf7	Ccr7	Cd27	Gpr171	Gpr183	Lag3	Tox	Klrc2	Nkg7	Cd44	Rora	Foxo1
1	Effector CD8T	Cd160	Dnajb1	Cxcr3	Cxcr4	Tbx21	Eomes	Slamf7	Entpd1	Cd38	Zeb2	Ccl5	Nr4a2
2	Central memory-like CD8T	Il7r	Sell	Klf2	Satb1	Klf3	Klf7	S1pr1	Myb	Bcl2	Nsg2	Il4ra	Foxp1	Bach2	Irf1	Lef1
3	Effector-exhausted CD8T	Prf1	Gzmb	Ifng	Pdcd1	Havcr2	Ctla4	Batf	Tcf3	Tbx21	Mki67	Cxcr3	Rgs1	Id2	Icos	Cd69	Irf8	Irf2	Cxcr3	Nfatc1	Nr4a1	Nr4a3	Fosb
4	Naive-like CD8T	Il7r	Sell	Lef1	Nsg2	Rps24	Rps29	Rps28	Il6ra	Slamf6
5	IFN-stimulated CD8T	Rsad2	Ifit3	Ifit1	Usp18	Ifit3b	Isg15	Ifi204	Ifit1bl1	Ifi209	Ifit2	Isg20	Bst2	Cxcl10	Irf7	Irf2	Cd69

## Sheet: Neutrophil-Tko Scr exp
cluster	cell type	cell markers
0	PMN	Csf1	Ifitm1	B2m	Gbp2	Herc6	CD14	Stat1	Ptgs2	Irf1	Il1b
1	PMN-MDSC	Cyba	Lcn2	Mmp8	Mmp9	Anxa1	Wfdc21	Cd33	Pla2g7	S100a8	S100a9
2	Activated PMN-MDSC1	Tnfrsf23	CD274	Vegfa	Hcar2	Mif	Ier3	Ier5	Ccl3	Ccl4	Cxcl2	Cxcl3	Ccrl2	Spp1	Xbp1	Klf6	Atf3	Basp1
3	Activated PMN-MDSC2	Cybb	Cyba	Ncf2	B2m	Itgam	Gbp2	Rpl12	Chil3	Tuba1b	CD14	cd177	Ltb4r1	Wfdc17	Csf1r	Cd33	Tgfb1	Pla2g7	Stat1	Stat3	Stat6	Irf1	Cd84	Cd36	Cd244a	Hmgb1	Xbp1	Klf6	Atf3	Vegfa	Ier5	Thbs1	Il1b	Btg1	Jun	Ccrl2
