# Supplementary material for: Cancer cells impede T cell early activation and drive immune evasion by transferring Tmem176b
Source: Research Square preprint supplement (doi:10.21203/rs.3.rs-6199894/v1), 2025-07-07
Supplement: Supplementary file 7 [file Supplementary Table_4_sgRNA List v2.xlsx]

## Sheet: sgRNA-for screening
target gene	sgRNA sequence
Non-target gene Scramble-1	ACCGACGTTTAATCGAGGCT
Non-target gene Scramble-2	GTAGAACGAGCCAACCATTT
Tmem176b-1	CTCGACGTAGTAGGGAACAC
Tmem176b-2	TATCGCACTGTCCCATACCC
Tmem176b-3	TGGACTGAGCTGTGCGCCTT
Lrp5-1	CCTCAATGGGACGTCCCGTA
Lrp5-2	CTCACCGGAAGGAGCCGTCC
Lrp5-3	CTCCGAGACCAACCGCATTG
Lrp6-1	GAGAATGCAACGATTGTAGT
LRP6-2	CGGACTGACTCTGGACTATC
LRP6-3	GTGCCAAAGATAGAACGTGC
Map4k4-1	GGTGACGTCCATAACCTTGA
Map4k4-2	GCTGGCCGCCATCAAGGTTA
Map4k4-3	CGAAATATTGCCACGTACTA
Anxa1-1	TTTGATGCAGATGAACTCCG
Anxa1-2	TCCATTCTCCTGTAAGTACG
Anxa1-3	GATCTGCTGGCGCTGAGCAT
Fzd7-1	TTCTCGCAGCGCAACCGCTC
Fzd7-2	TGGCTACCGCACGGTGGCGC
Fzd7-3	CGAGTGCGACGCCGCCGTGC
Hspg2-1	ATCTCCCATAGGTGACGCAT
Hspg2-2	TGCCCACGTCTCCGCTGCCG
Hspg2-3	CCACAGCCTCCGACACCTCT
Sdcbp-1	CCTGTGACAGGTAACGATGC
Sdcbp-2	CCAGCATCGTTACCTGTCAC
Sdcbp-3	CGCCAGCCAAGCATTTGTTC
Tmem59-1	AATTCAGTATGCACCGCAGT
Tmem59-2	ACCAGATTCACATTCCAGCT
Tmem59-3	TGACAAGCATACTGCTCATC
Vimentin-1	CAGGGCATCGTTGTTCCGGT
Vimentin-2	GCGCCAGCAGTATGAAAGCG
Vimentin-3	AGCAGGAGTCAAACGAGTAC
Mfge8-1	ACTCACCAGACGCGGCGAAG
Mfge8-2	ATTGTCTTGGCCCGTCAAGC
Mfge8-3	TCGGGCATCCACTGTGAAAC
Angptl2-1	TGAGTATGCCAGTTTCCGAC
Angptl2-2	AGCTTATAGTACTCGCTTTC
Angptl2-3	GGTACCGTGGGGGCCATTAC
Igsf8-1	ACCACTGTACGGCCGCTGAG
Igsf8-2	GCCCAGGTACTGCGTATCTG
Igsf8-3	AGGGACTGATCGGTACCGAA
Eva1b-1	GGAGCTACTCAGCAACAGCC
Eva1b-2	AGACGCCAAGCACGAAGTAG
Eva1b-3	GGGTCCCGATGACACGCTGC
Edil3-1	CATATTCCGCCATTTCTGCA
Edil3-2	CCACCTCACCTTTGCCGAAC
Edil3-3	TCCGAACTGCTCTAGTGTTG
Flot1-1	CAAAGTGGCCTCCTCCGACC
Flot1-2	CGGGGTCCCCATCTCAGTCA
Flot1-3	GGCAATGCCCGTGACTGAGA
Flot2-1	TAGAGCGTAGATGCCCCTCC
Flot2-2	GACGTTGCAGCCCCGCTGTG
Flot2-3	GGGGGTAGCTTTAACTGTGA
Slc7a5-1	TGTGAACTGCTACAGCGTAA
Slc7a5-2	AGGAGATGATCAACCCCTAC
Slc7a5-3	TCCTTTCAGGAACCTGCCCC
Fgg-1	TACTTACGAATCTCTCATCT
Fgg-2	TAACCCACGAGACAAGCATT
Fgg-3	GTGCAAATCCATGACACAAC
C8b-1	ATTGTGTGACTTGTCCGACA
C8b-2	AGCAGTACTGGGCAATTGAC
C8b-3	ACATCGTACTTGACTCCTGC
Agrn-1	TCCATCGGCTGAAGGTACAC
Agrn-2	CCCCCTCATCTGCGACAACC
Agrn-3	GGTTGTAGGACACAGACACG
Adamts4-1	GCTTACCATAACCATTGTCC
Adamts4-2	GGGTGGCCGCTGTCTGCACG
Adamts4-3	GGGTTCCTCTCGCCATGTCA
Lama4-1	ACAGCGTTCACACTTGAATC
Lama4-2	CTGTTTCAGAGATGTGACGC
Lama4-3	CTGACTTACCAGACAGAATC
Fat1-1	CCGGGTCAAAAGCCTCAATC
Fat1-2	GAGAGTCGACTTCCCACTAC
Fat1-3	GTCTCATCACAACCACGTCG
Gnaq-1	CCTTGCAGAATGGTCGATGT
Gnaq-2	TACTCTGACGAAGACAAGCG
Gnaq-3	CGAATATGATCAAGTTCTTG
Adamts1-1	TCCCACACGTGTGACACTCT
Adamts1-2	CGCCAGTGTCAGTTTACATT
Adamts1-3	GTTGGCATCGTACAAGGTAC
Apoe-1	GCTTCTGGGATTACCTGCGC
Apoe-2	CTGTTGGTCACATTGCTGAC
Apoe-3	CAGCAATGTGACCAACAGCA
Igsf3-1	AGAGCGCCGCGCCAGTACCC
Igsf3-2	TGTGGTGTCAGCGCAGCGAC
Igsf3-3	CCGGGACGGCACCTTGCAGC
Itga4-1	TTATCCAGACTTGTGGGCAC
Itga4-2	TTAGATTATACGAGAAAATT
Itga4-3	AAAGGGTGACCCCCAGCCAC
Adamts1-1	TCCCACACGTGTGACACTCT
Adamts1-2	CGCCAGTGTCAGTTTACATT
Adamts1-3	GTTGGCATCGTACAAGGTAC
Vps37b-1	GCACATGCGCCGTGTGAAAG
Vps37b-2	TCTGTTAGCGCTTCTTCAAG
Vps37b-3	ACAGTCTAACAACGCTTCCT

## Sheet: sgRNA-for others
target gene	sgRNA sequence
CD274(Pdl1)-1	GTTTACTATCACGGCTCCAA
CD274(Pdl1)-2	GGGGAGAGCCTCGCTGCCAA
Rab27a-1	CCAGGAGCATCTCAATCGCG
Rab27a-2	AGTACGCGTGCATCTGTAGC
Rab27a-3	TTGGACCGTACCACTCCCTC
Tmem176b-8	GGATGCTGATGTGAGCGGAC
hTMEM176B-gRNA1	ATGTGGACGTTGACGTGGGT
hTMEM176B-gRNA2	GTTTGCCCGGGTGCTTCTCA
hTMEM176B-gRNA3	CTCATAACCAATCCTGGCTG
