# Supplementary material for: Cancer cells impede T cell early activation and drive immune evasion by transferring Tmem176b
Source: Research Square preprint supplement (doi:10.21203/rs.3.rs-6199894/v1), 2025-07-07
Supplement: Supplementary file 9 [file Supplementary Table_5_B16-WT Exo vs B16-T8KO exo MS.xlsx]

## Sheet: Sheet1
Protein.Group	Protein.Ids	Protein.Names	Genes	First.Protein.Description	F:\wyy\20210823_GXJ\GXJ_B16-E1_DIA_Slot1-20_1_12291.d	F:\wyy\20210823_GXJ\GXJ_B16-E2_DIA_Slot1-21_1_12293.d	F:\wyy\20210823_GXJ\GXJ_B16-E3_DIA_Slot1-22_1_12295.d	F:\wyy\20210823_GXJ\GXJ_B16-T8-E1_DIA_Slot1-23_1_12297.d	F:\wyy\20210823_GXJ\GXJ_B16-T8-E2_DIA_Slot1-24_1_12299.d	F:\wyy\20210823_GXJ\GXJ_B16-T8-E3-DIA_Slot1-25_1_12301.d
A0A087WP33;Q3ZAQ4	Q3ZAQ4;A0A087WP33	A0A087WP33_MOUSE;Q3ZAQ4_MOUSE	Atg9a	Autophagy-related protein 9 (Fragment)	NA	1834.47	1751.98	NA	NA	NA
A0A0A6YWK7	A0A0A6YWK7	A0A0A6YWK7_MOUSE	Igsf8	Immunoglobulin superfamily member 8 (Fragment)	38576.8	576.225	9172.14	NA	NA	NA
A0A0J9YUR3	A0A0J9YUR3	A0A0J9YUR3_MOUSE	Tbl1xr1	F-box-like/WD repeat-containing protein TBL1XR1 (Fragment)	NA	2514.66	NA	NA	NA	NA
A0A0N4SVK3	A0A0N4SVK3	A0A0N4SVK3_MOUSE	Lsm5	U6 snRNA-associated Sm-like protein LSm5	1264.87	NA	2122.38	NA	NA	NA
A0A0U1RPK4	A0A0U1RPK4	A0A0U1RPK4_MOUSE	Slc3a2	4F2 cell-surface antigen heavy chain	366.11	NA	NA	NA	NA	NA
A0A140LIX7	A0A140LIX7	A0A140LIX7_MOUSE	Rab34	Ras-related protein Rab-34	1849.66	2076.92	NA	NA	NA	NA
A0A1L1SSQ5	A0A1L1SSQ5	A0A1L1SSQ5_MOUSE	Pafah1b2	Platelet-activating factor acetylhydrolase IB subunit alpha2 (Fragment)	NA	NA	NA	140.576	NA	345.317
A0A1Y7VMC8;Q8VC77;Q9CZU0	Q9CZU0;Q8VC77;A0A1Y7VMC8	A0A1Y7VMC8_MOUSE;Q8VC77_MOUSE;Q9CZU0_MOUSE	Akr1c20	Aldo-keto reductase family 1, member C20 (Fragment)	1974.28	NA	NA	NA	NA	NA
A0A2R8VHH6;Q91V35	Q91V35;A0A2R8VHH6	A0A2R8VHH6_MOUSE;Q91V35_MOUSE	Ptpra	Protein-tyrosine-phosphatase (Fragment)	5107.43	7242.29	7173.4	NA	NA	NA
A0A5F8MPX4	A0A5F8MPX4	A0A5F8MPX4_MOUSE	Ptpmt1	Phosphatidylglycerophosphatase and protein-tyrosine phosphatase 1	3954.53	1358.99	5487.44	NA	NA	NA
A2A432;Q3TCH7	A2A432;Q3TCH7;E9PXY1	CUL4A_MOUSE;CUL4B_MOUSE	Cul4a;Cul4b	Cullin-4B	4338.99	5026.24	3498.68	NA	NA	NA
A2A699	A2A699	F1712_MOUSE	Fam171a2	Protein FAM171A2	1387.73	NA	1381.12	NA	NA	NA
A2A6H1	A2A6H1	A2A6H1_MOUSE	Lasp1	LIM and SH3 domain protein 1 (Fragment)	6826.42	9191.86	7954.16	NA	NA	NA
A2A8L5	A2A8L5;A0A1Y7VNR5	PTPRF_MOUSE	Ptprf	Receptor-type tyrosine-protein phosphatase F	1374.07	NA	NA	NA	NA	NA
A2A8L5;B0V2N1	B0V2N1;A2A8L5;Q64487;Q5SPA9;B9EJA3;G3UY75;G3UX60;F6Y3V0;G3UYU6;G3UWK6;E9PVW8;F6S1X8;E9Q7I7	PTPRF_MOUSE;PTPRS_MOUSE	Ptprf;Ptprs	Receptor-type tyrosine-protein phosphatase F	4822.83	NA	NA	NA	NA	NA
A2A8Z1	A2A8Z1;Q5FWX7;F6UHR6;E9Q6C1;E9PXZ2;A0A0A6YXH3	OSBL9_MOUSE	Osbpl9	Oxysterol-binding protein-related protein 9	1192.1	979.437	1159.63	NA	NA	NA
A2A9H6	A2A9H6	A2A9H6_MOUSE	Gm884	Predicted gene 884	3067.46	13394.2	19983.2	NA	NA	NA
A2AKG8	A2AKG8;E9PYJ6	FOCAD_MOUSE	Focad	Focadhesin	734.447	NA	NA	NA	NA	NA
A2AQ07;P68372;P99024;Q7TMM9;Q922F4;Q9D6F9;Q9ERD7	Q9D6F9;P99024;Q9ERD7;Q9CWF2;Q7TMM9;P68372;A2AQ07;Q922F4	TBB1_MOUSE;TBB2A_MOUSE;TBB3_MOUSE;TBB4A_MOUSE;TBB4B_MOUSE;TBB5_MOUSE;TBB6_MOUSE	Tubb1;Tubb2a;Tubb3;Tubb4a;Tubb4b;Tubb5;Tubb6	Tubulin beta-1 chain	24983.9	NA	28125.2	NA	NA	NA
A2AR95	A2AR95	LRAD3_MOUSE	Ldlrad3	Low-density lipoprotein receptor class A domain-containing protein 3	12362.3	NA	8375.75	NA	NA	NA
B1AXB9	B1AXB9	B1AXB9_MOUSE	Tesl1	Testin	1778.92	1789.8	910.912	NA	NA	NA
B1AZ14;B1AZ15;B1AZ26	B1AZ14;B1AZ26;B1AZ15	B1AZ14_MOUSE;B1AZ15_MOUSE;B1AZ26_MOUSE	Cobll1	Cordon-bleu protein-like 1	3314.91	1700.92	2018.24	NA	NA	NA
B2RRE7	B2RRE7;A0A0R4J260	OTUD4_MOUSE	Otud4	OTU domain-containing protein 4	3047.26	NA	NA	NA	NA	NA
B2RRF0	B2RRF0	B2RRF0_MOUSE	Ptprk	Protein-tyrosine-phosphatase	408.615	NA	1288.82	NA	NA	NA
D3Z4W5;Q9D9G7	Q9D9G7;D3Z4W5	D3Z4W5_MOUSE;Q9D9G7_MOUSE	1700074P13Rik	RIKEN cDNA 1700074P13 gene (Fragment)	NA	NA	NA	1352.56	33844	1147.44
D3Z5I1	D3Z5I1	D3Z5I1_MOUSE	Zc3hav1	Zinc finger CCCH-type antiviral protein 1	2657.37	NA	2448.57	NA	NA	NA
E0CX23;E0CXP6;E0CYZ5;E0CZ38;E0CZ61	E0CXP6;E0CX23;E0CYZ5;E0CZ38;E0CZ61	E0CX23_MOUSE;E0CXP6_MOUSE;E0CYZ5_MOUSE;E0CZ38_MOUSE;E0CZ61_MOUSE	Gm45062;Umad1	UMAP1-MVP12-associated (UMA) domain-containing 1	2184.18	NA	NA	NA	NA	NA
E9PWI3;G3UW40	E9PWI3;G3UW40	E9PWI3_MOUSE;G3UW40_MOUSE	Mcc	Mutated in colorectal cancers	396.717	NA	NA	NA	NA	NA
E9Q401	E9Q401;Q80ZZ5;F6U7V1	RYR2_MOUSE	Ryr2	Ryanodine receptor 2	NA	NA	NA	707.61	NA	NA
E9Q5C9	E9Q5C9;A0A286YDZ1;A0A286YCD1;A0A286YDT3;A0A286YDA2;A0A286YDV7	NOLC1_MOUSE	Nolc1	Nucleolar and coiled-body phosphoprotein 1	2185.68	2184.41	739.922	NA	NA	NA
E9Q7B0	E9Q7B0	E9Q7B0_MOUSE	P4ha1	Procollagen-proline 4-dioxygenase	1218.18	NA	NA	NA	NA	NA
E9QN31	E9QN31	E9QN31_MOUSE	Nop2	Probable 28S rRNA (cytosine-C(5))-methyltransferase	1584.46	NA	956.331	NA	NA	NA
F7DBQ0;Q3TML0	Q3TML0;F7DBQ0	F7DBQ0_MOUSE;Q3TML0_MOUSE	Pdia6	Protein disulfide-isomerase A6	1894.24	1987.39	1106.79	NA	NA	NA
F8VPK0	F8VPK0	F8VPK0_MOUSE	Ttc37	Tetratricopeptide repeat domain 37	644.842	NA	NA	NA	NA	NA
H3BLG5	H3BLG5	H3BLG5_MOUSE	Sdcbp	Syntenin-1 (Fragment)	NA	NA	NA	1050.61	NA	NA
O08582	O08582	GTPB1_MOUSE	Gtpbp1	GTP-binding protein 1	948.841	452.02	497.187	NA	NA	NA
O08583;Q9JJW6	O08583;Q9JJW6;G3X9I4	ALRF2_MOUSE;THOC4_MOUSE	Alyref;Alyref2	THO complex subunit 4	1753.7	NA	2655.98	NA	NA	NA
O08638;Q61879	O08638;Q61879;A0A2R8VHF9;Q3UH59;A0A338P6K2;E9QPE7;Q5SV64	MYH10_MOUSE;MYH11_MOUSE	Myh10;Myh11	Myosin-11	4485.74	6493.51	3797	NA	NA	NA
O08762	O08762	NETR_MOUSE	Prss12	Neurotrypsin	483.953	NA	333.127	NA	NA	NA
O08796	O08796	EF2K_MOUSE	Eef2k	Eukaryotic elongation factor 2 kinase	2110.05	1750.74	1357.83	NA	NA	NA
O08914	O08914	FAAH1_MOUSE	Faah	Fatty-acid amide hydrolase 1	NA	7043.97	2237.99	NA	NA	NA
O08967;P63034;Q9QX11	O08967;P63034;Q9QX11;A0A1Y7VIW9;A2A517;Q3TZ02;G5E8Q4;Q99KH2;A0A1B0GRX7	CYH1_MOUSE;CYH2_MOUSE;CYH3_MOUSE	Cyth1;Cyth2;Cyth3	Cytohesin-3	1787.71	649.324	855.199	NA	NA	NA
O09010	O09010	LFNG_MOUSE	Lfng	Beta-1,3-N-acetylglucosaminyltransferase lunatic fringe	1757.1	NA	1181.05	NA	NA	NA
O35071	Q60575;P33173;O35071;Q3V3Y9;G3UW47;Q6TA13;A0A087WQE8;A0A5F8MPF0;E9QAN4;A2AH75;E9Q9G6;E9Q9B0	KIF1C_MOUSE	Kif1c	Kinesin-like protein KIF1C	958.235	515.4	225.174	NA	NA	NA
O35280	O35280;G3UYC5	CHK1_MOUSE	Chek1	Serine/threonine-protein kinase Chk1	825.872	508.797	NA	NA	NA	NA
O35326;Q3TWW8	O35326;Q8VE97;Q3TWW8;Q9D8S5;Q542V3	SRSF5_MOUSE;SRSF6_MOUSE	Srsf5;Srsf6	Serine/arginine-rich splicing factor 5	15313.8	13551.4	36062.2	NA	NA	NA
O35516;Q01705	O35516;Q01705	NOTC1_MOUSE;NOTC2_MOUSE	Notch1;Notch2	Neurogenic locus notch homolog protein 2	3112.23	813.692	NA	NA	NA	NA
O35551	O35551;J3QJV7	RABE1_MOUSE	Rabep1	Rab GTPase-binding effector protein 1	687.442	1706.85	1391.17	NA	NA	NA
O35969	O35969	GAMT_MOUSE	Gamt	Guanidinoacetate N-methyltransferase	5986.23	NA	3126.83	NA	NA	NA
O55106;Q9ERG2	O55106;P58404;Q9ERG2;B2RQS1;V9GXT1	STRN3_MOUSE;STRN_MOUSE	Strn;Strn3	Striatin	1206.95	NA	425.565	NA	NA	NA
O70167	O70167	P3C2G_MOUSE	Pik3c2g	Phosphatidylinositol 4-phosphate 3-kinase C2 domain-containing subunit gamma	55862.3	NA	2574.22	NA	NA	NA
O70172	O70172;F6RJE8	PI42A_MOUSE	Pip4k2a	Phosphatidylinositol 5-phosphate 4-kinase type-2 alpha	369.888	NA	1039	NA	NA	NA
O70311	O70311;F7APP3;A2AJH3	NMT2_MOUSE	Nmt2	Glycylpeptide N-tetradecanoyltransferase 2	1862.8	501.616	NA	NA	NA	NA
O70370	O70370;F6WR04	CATS_MOUSE	Ctss	Cathepsin S	NA	592.185	NA	NA	NA	NA
O70493	O70493;Q3TGS7;Q3V2H3;Q6ZWQ5	SNX12_MOUSE	Snx12	Sorting nexin-12	3640.07	NA	6134.51	NA	NA	NA
O70496	O70496;E9PYL4;F6SUM2	CLCN7_MOUSE	Clcn7	H(+)/Cl(-) exchange transporter 7	2559.61	2107.43	1831.86	NA	NA	NA
O70591	O70591;F8WJ30	PFD2_MOUSE	Pfdn2	Prefoldin subunit 2	3455.38	1246.5	1810.23	NA	NA	NA
O88200	O88200	CLC11_MOUSE	Clec11a	C-type lectin domain family 11 member A	1329.3	NA	NA	NA	NA	NA
O88207;Q61245	Q61245;O88207;A0A5F8MQ70;A3KGE7	CO5A1_MOUSE;COBA1_MOUSE	Col11a1;Col5a1	Collagen alpha-1(V) chain	158.692	NA	572.127	NA	NA	NA
O88393	O88393;A0A0R4J097	TGBR3_MOUSE	Tgfbr3	Transforming growth factor beta receptor type 3	741.988	NA	NA	NA	NA	NA
O88622	O88622;E9Q088;G3X8U8	PARG_MOUSE	Parg	Poly(ADP-ribose) glycohydrolase	665.08	281.271	NA	NA	NA	NA
O88741	O88741	GDAP1_MOUSE	Gdap1	Ganglioside-induced differentiation-associated protein 1	NA	NA	NA	24358.8	NA	32231.1
O88796	O88796	RPP30_MOUSE	Rpp30	Ribonuclease P protein subunit p30	1041.18	319.609	NA	NA	NA	NA
O88803	O88803;A0A0R4J0R8	LECT2_MOUSE	Lect2	Leukocyte cell-derived chemotaxin-2	999.915	7238.3	3169.84	NA	NA	NA
O88958;Q9CRC9	O88958;Q9CRC9;D3YWR1;A0A494BB68;A0A494B9X2;D3Z0R5	GNPI1_MOUSE;GNPI2_MOUSE	Gnpda1;Gnpda2	Glucosamine-6-phosphate isomerase 1	2980.6	1771.81	1741.12	NA	NA	NA
O89079	O89079;D3Z315	COPE_MOUSE	Cope	Coatomer subunit epsilon	4366.64	NA	3595.02	NA	NA	NA
P05480;P16056;Q922K9	Q62270;P05480;Q62190;P16056;Q922K9;F8VQL0;Q0VBH4	FRK_MOUSE;MET_MOUSE;SRC_MOUSE	Frk;Met;Src	Neuronal proto-oncogene tyrosine-protein kinase Src	4672.81	9578.62	4848.55	NA	NA	NA
P05480;Q04736	P05480;Q04736	SRC_MOUSE;YES_MOUSE	Src;Yes1	Neuronal proto-oncogene tyrosine-protein kinase Src	7376.79	NA	2943.82	NA	NA	NA
P05532;P05622;P63085;Q63844	P05622;P26618;P35969;P35918;P35917;Q63844;P63085;P05532;Q00342;O54949;Q3UEW6;A0A0R4J0A4;D3Z3G6;D3Z6D8;E9QN12;A0A0U1RPX4	KIT_MOUSE;MK01_MOUSE;MK03_MOUSE;PGFRB_MOUSE	Kit;Mapk1;Mapk3;Pdgfrb	Mast/stem cell growth factor receptor Kit	17618.8	NA	14953.6	NA	NA	NA
P06795;Q9DC29	Q9DC29;P21440;P06795;P21447;A0A0G2JDM4;F6SGP4	ABCB6_MOUSE;MDR1B_MOUSE	Abcb1b;Abcb6	ATP-dependent translocase ABCB1	11993.4	324.522	5383.55	NA	NA	NA
P08103;P16092;P25911;P39688;Q04736	P06240;P16092;P08103;Q61851;Q03142;P39688;Q9JKV2;P21803;P14234;Q9JHU3;P25911;P16277;Q04859;Q04736;Q3UZZ3;E9Q700;D3YZ57;A0A1Y7VJE1;E9QNJ9;Q7TSI8;Q61563;E9Q7T0;E9Q7C7;D3Z5M8;E9Q696;A0A1Y7VIW8;F6UND7;A0A1Y7VKB8;E9Q708;F2Z480;J3QN85;E9PX90;E9Q5C2;A0A286YD80;A0A0R4IZY3;A0A286YCF7;E9Q5C3;E9Q7E8;E9PX88;F6TK14;E9PX60;E9QK53;E9PVU6;E9PX67;A0A0J9YTQ5;E9PXV8;E9Q7E6;A0A1Y7VNS6	FGFR1_MOUSE;FYN_MOUSE;HCK_MOUSE;LYN_MOUSE;YES_MOUSE	Fgfr1;Fyn;Hck;Lyn;Yes1	Tyrosine-protein kinase HCK	NA	28794.1	16923.5	NA	NA	NA
P08207	P08207	S10AA_MOUSE	S100a10	Protein S100-A10	1651.14	NA	NA	NA	NA	NA
P08752;P18872;P63094;Q9DC51	Q8CGK7;P20612;P08752;P63094;Q3V3I2;B2RSH2;P50149;P18872;Q9DC51;Q6R0H7;Q8C040;A2AE31;Q8BHK8;Q66L47;Z4YKV1;A2AE32;A2A610	GNAI2_MOUSE;GNAI3_MOUSE;GNAO_MOUSE;GNAS2_MOUSE	Gnai2;Gnai3;Gnao1;Gnas	Guanine nucleotide-binding protein G(i) subunit alpha-2	NA	NA	NA	227626	452438	129338
P09470	P09470;F6QCP8	ACE_MOUSE	Ace	Angiotensin-converting enzyme	1255.2	NA	NA	NA	NA	NA
P0CG14	P0CG14	DERPC_MOUSE	Derpc	Decreased expression in renal and prostate cancer protein	1688.68	NA	NA	NA	NA	NA
P11531	P11531;A0A1Q1PRS4;A2A9Z1;A2A9Z2;A0A668KLA2	DMD_MOUSE	Dmd	Dystrophin	1655.32	NA	241.105	NA	NA	NA
P12025	P12025	MK_MOUSE	Mdk	Midkine	830.629	544.748	1582.08	NA	NA	NA
P12382;Q9WUA3	P12382;Q9WUA3;Q8C605	PFKAL_MOUSE;PFKAP_MOUSE	Pfkl;Pfkp	ATP-dependent 6-phosphofructokinase, liver type	9642.47	NA	3350.52	NA	NA	NA
P13864	P13864;J3QNW0	DNMT1_MOUSE	Dnmt1	DNA (cytosine-5)-methyltransferase 1	2211.23	627.099	1219.64	NA	NA	NA
P15105	P15105;D3YVK1	GLNA_MOUSE	Glul	Glutamine synthetase	3560.36	1046.68	1605.97	NA	NA	NA
P15208;Q60751	Q9WTL4;P15208;Q60751;E9QNX9	IGF1R_MOUSE;INSR_MOUSE	Igf1r;Insr	Insulin receptor	3495.53	4148.9	3529.83	NA	NA	NA
P15535	P15535;B1AXY5	B4GT1_MOUSE	B4galt1	Beta-1,4-galactosyltransferase 1	2597.57	1572.52	1407.69	NA	NA	NA
P16301	P16301	LCAT_MOUSE	Lcat	Phosphatidylcholine-sterol acyltransferase	28355.9	3822.3	14148	NA	NA	NA
P17897	P17897	LYZ1_MOUSE	Lyz1	Lysozyme C-1	810.186	NA	1430.63	NA	NA	NA
P18653	P18653;Q505N6;F6Q8A4;E9PWV3;F6RQA2;G3UZI3	KS6A1_MOUSE	Rps6ka1	Ribosomal protein S6 kinase alpha-1	1011.45	NA	NA	NA	NA	NA
P21107	P21107;E9Q7Q3;D3Z6I8;E9Q5J9;D3Z2H9;D3YVR0;A0A0R4J1P2	TPM3_MOUSE	Tpm3	Tropomyosin alpha-3 chain	2277.83	NA	1472.61	NA	NA	NA
P22725;P22726	P22726;P22725;D3YTW9;A0A0R4J1M1	WNT5A_MOUSE;WNT5B_MOUSE	Wnt5a;Wnt5b	Protein Wnt-5a	1165.69	876.065	662.852	NA	NA	NA
P23188	P23188	FURIN_MOUSE	Furin	Furin	NA	NA	1417.21	NA	NA	NA
P23506	P23506;E0CYV0;F6V9F1;F6TXE3;E9PWE0;F7D432	PIMT_MOUSE	Pcmt1	Protein-L-isoaspartate(D-aspartate) O-methyltransferase	2211	2089.39	1076.6	NA	NA	NA
P24288	P24288;Q8CBC8;B2KFA8;A0A0N4SV61;E9Q4K3	BCAT1_MOUSE	Bcat1	Branched-chain-amino-acid aminotransferase, cytosolic	2507.44	588.072	1025.68	NA	NA	NA
P24547;P50096	P24547;P50096;F7DEU6;E0CYE2;A0A0A6YXS4;E0CXK0	IMDH1_MOUSE;IMDH2_MOUSE	Impdh1;Impdh2	Inosine-5'-monophosphate dehydrogenase 2	8937.31	1444.17	5565.64	NA	NA	NA
P26450;Q8CIH5	P26450;Q9QZE2;Q8CIH5;Q80UI5;E9PXZ8	P85A_MOUSE;PLCG2_MOUSE	Pik3r1;Plcg2	Phosphatidylinositol 3-kinase regulatory subunit alpha	2910.63	NA	888.64	NA	NA	NA
P27048;P63163	P63163;P27048;A0A0G2JGN4	RSMB_MOUSE;RSMN_MOUSE	Snrpb;Snrpn	Small nuclear ribonucleoprotein-associated protein B	2284.47	NA	NA	NA	NA	NA
P27600;P27601	P27600;P27601;Q9D034;A0A0G2JG40	GNA12_MOUSE;GNA13_MOUSE	Gna12;Gna13	Guanine nucleotide-binding protein subunit alpha-12	118203	480290	453134	NA	NA	NA
P28301	P28301	LYOX_MOUSE	Lox	Protein-lysine 6-oxidase	12074.7	697.63	3490.37	NA	NA	NA
P28740;Q922S8	Q922S8;P28740;Q3TTL2;F8VQ42;E0CZ72	KIF2A_MOUSE;KIF2C_MOUSE	Kif2a;Kif2c	Kinesin-like protein KIF2A	4168.64	NA	5995.83	NA	NA	NA
P28741	P28741;Q61771;Q3TET1;Q3UI47;B1AQZ2	KIF3A_MOUSE	Kif3a	Kinesin-like protein KIF3A	515.266	NA	NA	NA	NA	NA
P28828;P35822	P28828;P35822;Q68FM4;A0A1W2P7Y1;B2RRF0	PTPRK_MOUSE;PTPRM_MOUSE	Ptprk;Ptprm	Receptor-type tyrosine-protein phosphatase mu	5112.86	8664.78	6654.16	NA	NA	NA
P29319;P54761;Q61772	P54763;Q8CBF3;P35991;Q61772;P29319;Q62413;P54761;Q03145;P54754;Q60629;O09127;B7ZNN5;E9PUQ2;E0CYA3;Q8BRB1;Q6PFV6;Q8C8K1;E9PUQ4;E9PUP9;G1K381;E9PUQ0;E9PWK7;A2BDW0;A2BDQ4	EPHA3_MOUSE;EPHA7_MOUSE;EPHB4_MOUSE	Epha3;Epha7;Ephb4	Ephrin type-A receptor 3	18103.3	47378.3	28155.1	NA	NA	NA
P29387;P62880	P29387;P62880;D3Z1M1;E9PWM7;D3YZX3;D3Z1T4;E9QKR0	GBB2_MOUSE;GBB4_MOUSE	Gnb2;Gnb4	Guanine nucleotide-binding protein subunit beta-4	80545.8	3169.23	22329.4	NA	NA	NA
P30677	P30677;A0A494BBL5	GNA14_MOUSE	Gna14	Guanine nucleotide-binding protein subunit alpha-14	NA	NA	910.087	NA	NA	NA
P33215	P33215	NEDD1_MOUSE	Nedd1	Protein NEDD1	1586.71	NA	NA	NA	NA	NA
P33434	P33434	MMP2_MOUSE	Mmp2	72 kDa type IV collagenase	3616.02	NA	3328.85	NA	NA	NA
P34914	P34914;A8JYK8	HYES_MOUSE	Ephx2	Bifunctional epoxide hydrolase 2	19027	NA	2638.79	NA	NA	NA
P34960	P34960;Q8BJC0;Q3TCW6	MMP12_MOUSE	Mmp12	Macrophage metalloelastase	2014.87	NA	3258.72	NA	NA	NA
P35276;P55258;P61028;P63011;Q9DD03	P62823;P55258;P61028;Q9DD03;P63011;Q9CZT8;P35276;Q9CXS2;A0A286YDR2;D3YW33;A2A7Z6;D3YWL1	RAB13_MOUSE;RAB3A_MOUSE;RAB3D_MOUSE;RAB8A_MOUSE;RAB8B_MOUSE	Rab13;Rab3a;Rab3d;Rab8a;Rab8b	Ras-related protein Rab-3D	36637.7	13004.2	11347.8	NA	NA	NA
P36536	P36536;Q99JZ4	SAR1A_MOUSE	Sar1a	GTP-binding protein SAR1a	841.858	NA	NA	NA	NA	NA
P36552	P36552	HEM6_MOUSE	Cpox	Oxygen-dependent coproporphyrinogen-III oxidase, mitochondrial	878.843	150.192	NA	NA	NA	NA
P36916	P36916	GNL1_MOUSE	Gnl1	Guanine nucleotide-binding protein-like 1	1041.97	NA	685.093	NA	NA	NA
P36993	P36993;P49443;Q99NF7;Q9EQE2	PPM1B_MOUSE	Ppm1b	Protein phosphatase 1B	2350.19	NA	NA	NA	NA	NA
P39061	P39061;E9QPX1	COIA1_MOUSE	Col18a1	Collagen alpha-1(XVIII) chain	1472.49	4280.75	784.96	NA	NA	NA
P39689	P39689	CDN1A_MOUSE	Cdkn1a	Cyclin-dependent kinase inhibitor 1	656.395	NA	NA	NA	NA	NA
P46935;Q8CFI0	P46935;Q8CFI0;A0A494B9L5;E9PXB7;G3X9H8;A0A494BAE4;A0A494B9F0;A0A494BAG2;A0A571BDN7;A0A494BAX0;A0A494BA39;A0A494B953	NED4L_MOUSE;NEDD4_MOUSE	Nedd4;Nedd4l	E3 ubiquitin-protein ligase NEDD4	3936.76	5440.62	NA	NA	NA	NA
P46938	P46938;G3UYA6;G3UY62;G3UYV4	YAP1_MOUSE	Yap1	Transcriptional coactivator YAP1	16172.8	13969.7	NA	NA	NA	NA
P47758	P47758	SRPRB_MOUSE	Srprb	Signal recognition particle receptor subunit beta	1297.58	1697.31	1104.33	NA	NA	NA
P50096	P50096;F7DEU6;E0CYE2;E0CXK0	IMDH1_MOUSE	Impdh1	Inosine-5'-monophosphate dehydrogenase 1	890.349	NA	460.915	NA	NA	NA
P50284	P50284	TNR3_MOUSE	Ltbr	Tumor necrosis factor receptor superfamily member 3	1302.51	NA	773.313	NA	NA	NA
P50608	P50608	FMOD_MOUSE	Fmod	Fibromodulin	6536.18	2151.3	3097.89	NA	NA	NA
P52431	P52431;D6RFB8	DPOD1_MOUSE	Pold1	DNA polymerase delta catalytic subunit	540.102	NA	NA	NA	NA	NA
P52479	P52479	UBP10_MOUSE	Usp10	Ubiquitin carboxyl-terminal hydrolase 10	1022.11	NA	1275.01	NA	NA	NA
P53657	P53657;G3X925;D3Z2C4;E9Q509	KPYR_MOUSE	Pklr	Pyruvate kinase PKLR	7061.2	773.845	1526.03	NA	NA	NA
P53810;P53811	P53810;P53811;Q8JZZ5;J3QPW1;J3QQ30;F8WGG5	PIPNA_MOUSE;PIPNB_MOUSE	Pitpna;Pitpnb	Phosphatidylinositol transfer protein alpha isoform	2415.23	NA	1700.4	NA	NA	NA
P53995	P53995;A2ATQ5	APC1_MOUSE	Anapc1	Anaphase-promoting complex subunit 1	1644.27	NA	776.419	NA	NA	NA
P53996	P53996;A0A0N4SVS6	CNBP_MOUSE	Cnbp	Cellular nucleic acid-binding protein	3747.51	1495.66	1522.48	NA	NA	NA
P55065	P55065;A2A5K2	PLTP_MOUSE	Pltp	Phospholipid transfer protein	1054.34	1314.2	2639.83	NA	NA	NA
P55258;P61027;P61028;P63011;Q8BHC1;Q91V41	P62823;P61027;P55258;Q91V41;Q8BHC1;P61028;P63011;P35276;Q9CXS2;Q50HX3;A0A286YDR2;D3YW33;D3YWL1	RAB10_MOUSE;RAB14_MOUSE;RAB3A_MOUSE;RAB8A_MOUSE;RAB8B_MOUSE;RB39B_MOUSE	Rab10;Rab14;Rab39b;Rab3a;Rab8a;Rab8b	Ras-related protein Rab-8A	2674	NA	33794.2	NA	NA	NA
P55258;P61027;P61028;Q91V41	P62823;P61027;P55258;Q91V41;Q8BHC1;P61028;P63011;P35276;Q9CXS2;Q50HX3;A0A286YDR2;D3YW33;D3YWL1	RAB10_MOUSE;RAB14_MOUSE;RAB8A_MOUSE;RAB8B_MOUSE	Rab10;Rab14;Rab8a;Rab8b	Ras-related protein Rab-8A	250.399	NA	505.703	NA	NA	NA
P55821	P55821	STMN2_MOUSE	Stmn2	Stathmin-2	NA	NA	NA	NA	NA	NA
P56394	P56394	COX17_MOUSE	Cox17	Cytochrome c oxidase copper chaperone	NA	NA	NA	NA	NA	NA
P56564	P56564	EAA1_MOUSE	Slc1a3	Excitatory amino acid transporter 1	NA	518.178	1227.15	NA	NA	NA
P58465;P58466	P58465;P58466;G3UXN0	CTDS1_MOUSE;CTDSL_MOUSE	Ctdsp1;Ctdspl	CTD small phosphatase-like protein	6070.69	NA	NA	NA	NA	NA
P58802	P58802;Q5SPX8	TB10A_MOUSE	Tbc1d10a	TBC1 domain family member 10A	679.112	179.612	927.679	NA	NA	NA
P59108;Q8BLR2;Q8BT60	Q8BT60;Q1RLL3;Q9DC53;Q8JZW4;Q0VE82;Q9Z140;Q8BLR2;P59108;Q9D6C8;Q3UYN2;A0A0R4J1D0;A0A0R4J0J1	CPNE2_MOUSE;CPNE3_MOUSE;CPNE4_MOUSE	Cpne2;Cpne3;Cpne4	Copine-2	2584.31	2338.11	605.957	NA	NA	NA
P61804	P61804	DAD1_MOUSE	Dad1	Dolichyl-diphosphooligosaccharide--protein glycosyltransferase subunit DAD1	1612.02	1624.89	1360.42	NA	NA	NA
P61982;P68510	P68510;P61982	1433F_MOUSE;1433G_MOUSE	Ywhag;Ywhah	14-3-3 protein gamma	16153.9	NA	2302.52	NA	NA	NA
P62141;P63087	P63087;P62137;P62141;A0A0J9YUU8;A0A0G2JFF1	PP1B_MOUSE;PP1G_MOUSE	Ppp1cb;Ppp1cc	Serine/threonine-protein phosphatase PP1-beta catalytic subunit	NA	NA	NA	1949.84	NA	1044.24
P62317	P62317	SMD2_MOUSE	Snrpd2	Small nuclear ribonucleoprotein Sm D2	4334.81	2064.4	1326.25	NA	NA	NA
P62715	P62715	PP2AB_MOUSE	Ppp2cb	Serine/threonine-protein phosphatase 2A catalytic subunit beta isoform	2069.16	243.157	956.014	NA	NA	NA
P68181	P68181;H6TMF5	KAPCB_MOUSE	Prkacb	cAMP-dependent protein kinase catalytic subunit beta	2827.07	NA	NA	NA	NA	NA
P68372;P99024;Q7TMM9;Q9D6F9	Q9D6F9;P99024;Q9CWF2;Q7TMM9;P68372	TBB2A_MOUSE;TBB4A_MOUSE;TBB4B_MOUSE;TBB5_MOUSE	Tubb2a;Tubb4a;Tubb4b;Tubb5	Tubulin beta-4B chain	17412.1	837.464	4086.38	NA	NA	NA
P70175	P70175;Q52KF7;A2BEF2;A2BEE9	DLG3_MOUSE	Dlg3	Disks large homolog 3	713.844	NA	56.8153	NA	NA	NA
P70266	P70266	F261_MOUSE	Pfkfb1	6-phosphofructo-2-kinase/fructose-2,6-bisphosphatase 1	1847.33	NA	NA	NA	NA	NA
P70331	P70331;D3YVA0;D3YUT8;D3Z3N7	MDFI_MOUSE	Mdfi	MyoD family inhibitor	2105.74	NA	2680.5	NA	NA	NA
P70389	P70389;A0A0R4J0S2	ALS_MOUSE	Igfals	Insulin-like growth factor-binding protein complex acid labile subunit	17421.1	1013.07	1698.94	NA	NA	NA
P70677	P70677;A0A1B0GRX1	CASP3_MOUSE	Casp3	Caspase-3	1610.4	3827.57	1976.69	NA	NA	NA
P70697	P70697	DCUP_MOUSE	Urod	Uroporphyrinogen decarboxylase	4997.31	1788.17	2057.91	NA	NA	NA
P83870	P83870	PHF5A_MOUSE	Phf5a	PHD finger-like domain-containing protein 5A	3685.14	2604.67	2645.86	NA	NA	NA
P83887	P83887;Q8VCK3	TBG1_MOUSE	Tubg1	Tubulin gamma-1 chain	3924.52	NA	4612.94	NA	NA	NA
P97376	P97376	FRG1_MOUSE	Frg1	Protein FRG1	1331.62	NA	377.967	NA	NA	NA
P97379	P97379;A0A0J9YUY8;A0A0J9YTQ8	G3BP2_MOUSE	G3bp2	Ras GTPase-activating protein-binding protein 2	588.434	NA	350.628	NA	NA	NA
P97470	P97470	PP4C_MOUSE	Ppp4c	Serine/threonine-protein phosphatase 4 catalytic subunit	2688.31	801.823	890.414	NA	NA	NA
P98078	P98078;A0A0R4J104;Q3TRE6;E0CXT5;E9PX84;Q9DCE6;E9QL31	DAB2_MOUSE	Dab2	Disabled homolog 2	135.12	NA	NA	NA	NA	NA
P99025	P99025	GFRP_MOUSE	Gchfr	GTP cyclohydrolase 1 feedback regulatory protein	1054.42	329.349	923.476	NA	NA	NA
Q01705	Q01705	NOTC1_MOUSE	Notch1	Neurogenic locus notch homolog protein 1	412.444	NA	NA	NA	NA	NA
Q01705;Q61982	Q61982;Q01705;A0A494BAZ6	NOTC1_MOUSE;NOTC3_MOUSE	Notch1;Notch3	Neurogenic locus notch homolog protein 1	806.208	159.015	NA	NA	NA	NA
Q03137	Q03137	EPHA4_MOUSE	Epha4	Ephrin type-A receptor 4	NA	803.644	4244.97	NA	NA	NA
Q04207	Q04207;A0A494BA44	TF65_MOUSE	Rela	Transcription factor p65	1731.41	NA	995.213	NA	NA	NA
Q05186	Q05186	RCN1_MOUSE	Rcn1	Reticulocalbin-1	1608.32	433.889	NA	NA	NA	NA
Q05512	Q05512;E9QMP6;A0A0R4J0B1;Q3T9A3;E9Q8H5;E9PZ55;E9Q9N6;F6ZS70;E9Q2G8;A0A0R4J227;E9PYX3;E9Q2J6	MARK2_MOUSE	Mark2	Serine/threonine-protein kinase MARK2	938.799	NA	NA	NA	NA	NA
Q05CL8	Q05CL8	LARP7_MOUSE	Larp7	La-related protein 7	445.729	NA	547.755	NA	NA	NA
Q3HNM7	Q3HNM7;D3Z5D7;G3UW77;D3Z267;E0CXR9	INSC_MOUSE	Insc	Protein inscuteable homolog	811.334	NA	521.894	NA	NA	NA
Q3THJ3	Q3THJ3	EIF1A_MOUSE	Eif1ad	Probable RNA-binding protein EIF1AD	452.674	NA	420.023	NA	NA	NA
Q3THS6;Q91X83	Q91X83;Q3THS6;A0A0U1RNT6;A0A0U1RNK6	METK1_MOUSE;METK2_MOUSE	Mat1a;Mat2a	S-adenosylmethionine synthase isoform type-2	10108.1	NA	1319.83	NA	NA	NA
Q3TIU4	Q3TIU4	PDE12_MOUSE	Pde12	2',5'-phosphodiesterase 12	362.969	722.595	1471.7	NA	NA	NA
Q3U0V1	Q3U0V1;A0A3B2W465;A0A3B2WCD8	FUBP2_MOUSE	Khsrp	Far upstream element-binding protein 2	2828.63	1189.69	1952.04	NA	NA	NA
Q3U2P1	Q3U2P1;Q80ZX0;F6VJC5;A2AA71	SC24A_MOUSE	Sec24a	Protein transport protein Sec24A	2060.63	NA	NA	NA	NA	NA
Q3U7R1	Q3U7R1	ESYT1_MOUSE	Esyt1	Extended synaptotagmin-1	485.085	298.505	191.386	NA	NA	NA
Q3UGP9	Q3UGP9	LRC58_MOUSE	Lrrc58	Leucine-rich repeat-containing protein 58	1295.89	154.287	1247.97	NA	NA	NA
Q3UHH1	Q3UHH1	ZSWM8_MOUSE	Zswim8	Zinc finger SWIM domain-containing protein 8	1339.56	NA	NA	NA	NA	NA
Q3UM45	Q3UM45	PP1R7_MOUSE	Ppp1r7	Protein phosphatase 1 regulatory subunit 7	1354.12	NA	NA	NA	NA	NA
Q3UN02	Q3UN02;A0A3B2WDB3	LCLT1_MOUSE	Lclat1	Lysocardiolipin acyltransferase 1	1418.09	NA	1538.8	NA	NA	NA
Q3UQ28	Q3UQ28;A0A1W2P6L9	PXDN_MOUSE	Pxdn	Peroxidasin homolog	4497.51	3334.53	1304.54	NA	NA	NA
Q3UVK0	Q3UVK0;F6TQS9	ERMP1_MOUSE	Ermp1	Endoplasmic reticulum metallopeptidase 1	532.941	1138.3	NA	NA	NA	NA
Q3UVL4	Q3UVL4	VPS51_MOUSE	Vps51	Vacuolar protein sorting-associated protein 51 homolog	297.955	NA	230.589	NA	NA	NA
Q3UYV9	Q3UYV9	NCBP1_MOUSE	Ncbp1	Nuclear cap-binding protein subunit 1	468.305	NA	402.231	NA	NA	NA
Q4FZF3	Q4FZF3	DDX49_MOUSE	Ddx49	Probable ATP-dependent RNA helicase DDX49	2013.57	NA	624.073	NA	NA	NA
Q570Y9	Q570Y9;B2ZRS5	DPTOR_MOUSE	Deptor	DEP domain-containing mTOR-interacting protein	2078.25	NA	891.875	NA	NA	NA
Q5FWI3;Q8BI06	Q5FWI3;Q8BI06	CEIP2_MOUSE;CEMIP_MOUSE	Cemip;Cemip2	Cell surface hyaluronidase	2437.97	8525.33	5876.33	NA	NA	NA
Q5MJS3	Q5MJS3;Q8CID3	FA20C_MOUSE	Fam20c	Extracellular serine/threonine protein kinase FAM20C	145998	NA	NA	NA	NA	NA
Q5RJI4	Q5RJI4	PKDCC_MOUSE	Pkdcc	Extracellular tyrosine-protein kinase PKDCC	432.622	1543.94	NA	NA	NA	NA
Q5SQM0	Q5SQM0	EMAL6_MOUSE	Eml6	Echinoderm microtubule-associated protein-like 6	10204.3	7477.88	NA	NA	NA	NA
Q5SQX6	Q5SQX6;F6QD74	CYFP2_MOUSE	Cyfip2	Cytoplasmic FMR1-interacting protein 2	1198.41	332.602	257.595	NA	NA	NA
Q5SUE8	Q5SUE8	ANR40_MOUSE	Ankrd40	Ankyrin repeat domain-containing protein 40	554.901	992.557	NA	NA	NA	NA
Q5XKN4	Q5XKN4;A0A0N4SV89	JAGN1_MOUSE	Jagn1	Protein jagunal homolog 1	373.881	773.601	351.826	NA	NA	NA
Q60780	Q60780;B1ATI9;Q3U432;F6QB26	GAS7_MOUSE	Gas7	Growth arrest-specific protein 7	NA	NA	NA	NA	NA	NA
Q60787	Q60787;B1ATD1	LCP2_MOUSE	Lcp2	Lymphocyte cytosolic protein 2	1000.16	NA	NA	NA	NA	NA
Q61205	Q61205;D3Z7E6;D3Z2X5	PA1B3_MOUSE	Pafah1b3	Platelet-activating factor acetylhydrolase IB subunit alpha1	812.597	NA	NA	NA	NA	NA
Q61271;Q64729	Q64729;Q61271;Q8K348;Q9D5H8;Q3V348;E9Q418;A2AJR5	ACV1B_MOUSE;TGFR1_MOUSE	Acvr1b;Tgfbr1	Activin receptor type-1B	7616.73	2378.99	2148.5	NA	NA	NA
Q61282	Q61282	PGCA_MOUSE	Acan	Aggrecan core protein	1200.05	372.071	4660.68	NA	NA	NA
Q61554;Q61555	Q61555;Q61554	FBN1_MOUSE;FBN2_MOUSE	Fbn1;Fbn2	Fibrillin-1	4881.15	1206.66	8143.27	NA	NA	NA
Q61823	Q61823;A0A494BA05	PDCD4_MOUSE	Pdcd4	Programmed cell death protein 4	NA	NA	NA	1122.41	NA	NA
Q62181	Q62181	SEM3C_MOUSE	Sema3c	Semaphorin-3C	961.351	2868.25	2879.87	NA	NA	NA
Q62219	Q62219;E9Q1D5	TGFI1_MOUSE	Tgfb1i1	Transforming growth factor beta-1-induced transcript 1 protein	792.293	NA	797.401	NA	NA	NA
Q64692	Q64692;A0A087WRA0	SIA8D_MOUSE	St8sia4	CMP-N-acetylneuraminate-poly-alpha-2,8-sialyltransferase	1476.82	723.594	354.145	NA	NA	NA
Q68FF6	Q68FF6;Q5F258	GIT1_MOUSE	Git1	ARF GTPase-activating protein GIT1	1140	NA	1194.21	NA	NA	NA
Q69ZR2	Q69ZR2;F8WIE5	HECD1_MOUSE	Hectd1	E3 ubiquitin-protein ligase HECTD1	1317.82	709.139	NA	NA	NA	NA
Q6A028	Q6A028	SWP70_MOUSE	Swap70	Switch-associated protein 70	1136.71	NA	NA	NA	NA	NA
Q6IR34	Q6IR34	GPSM1_MOUSE	Gpsm1	G-protein-signaling modulator 1	1028.8	1029.47	NA	NA	NA	NA
Q6P1B3	Q6P1B3	PIANP_MOUSE	Pianp	PILR alpha-associated neural protein	12981.8	1631.16	18746.3	NA	NA	NA
Q6P5B0	Q6P5B0	RRP12_MOUSE	Rrp12	RRP12-like protein	992.167	450.835	85.5256	NA	NA	NA
Q6P5B5	Q6P5B5	Q6P5B5_MOUSE	Fxr2	Fragile X mental retardation syndrome-related protein 2	2350.38	2775.22	NA	NA	NA	NA
Q6PDN3	Q6PDN3;B1B1A8	MYLK_MOUSE	Mylk	Myosin light chain kinase, smooth muscle	1110.21	NA	2503.65	NA	NA	NA
Q6PEB6	Q6PEB6;G8JL35;E0CYJ0;E0CXA9	PHOCN_MOUSE	Mob4	MOB-like protein phocein	4142.22	4865.66	1844.69	NA	NA	NA
Q6PF93	Q6PF93;D3YZ98;E9Q824;E9QLS6	PK3C3_MOUSE	Pik3c3	Phosphatidylinositol 3-kinase catalytic subunit type 3	871.613	NA	901.331	NA	NA	NA
Q6R891	Q6R891	NEB2_MOUSE	Ppp1r9b	Neurabin-2	NA	NA	NA	NA	NA	349.959
Q6URW6	Q6URW6;K3W4R2;A0A140LI60	MYH14_MOUSE	Myh14	Myosin-14	6605.45	52622	24318.1	NA	NA	NA
Q6ZPS6	Q6ZPS6;A0A0G2JEA0	AKIB1_MOUSE	Ankib1	Ankyrin repeat and IBR domain-containing protein 1	749.527	NA	NA	NA	NA	NA
Q6ZQ08	Q6ZQ08;B7ZWL1;A0A1D5RMJ8	CNOT1_MOUSE	Cnot1	CCR4-NOT transcription complex subunit 1	1505.01	626.199	204.965	NA	NA	NA
Q6ZQ11	Q6ZQ11	CHSS1_MOUSE	Chsy1	Chondroitin sulfate synthase 1	3157.61	NA	2359.22	NA	NA	NA
Q7TMR0	Q7TMR0;A0A140LHY2	PCP_MOUSE	Prcp	Lysosomal Pro-X carboxypeptidase	2931.3	759.719	808.906	NA	NA	NA
Q7TN75	Q7TN75;E9Q3F7;H3BJQ1	PEG10_MOUSE	Peg10	Retrotransposon-derived protein PEG10	447.391	NA	3282.12	NA	NA	NA
Q80U58	Q80U58;Q3UR91;Q3TQ29	PUM2_MOUSE	Pum2	Pumilio homolog 2	921.427	1071.06	751.171	NA	NA	NA
Q80UW8	Q80UW8	RPAB1_MOUSE	Polr2e	DNA-directed RNA polymerases I, II, and III subunit RPABC1	261.95	1255.81	863.848	NA	NA	NA
Q80UX8	Q80UX8	ABHDD_MOUSE	Abhd13	Protein ABHD13	1239.3	NA	NA	NA	NA	NA
Q80WG5;Q8R502	Q80WG5;Q66JT1;Q5DU41;Q8R502	LRC8A_MOUSE;LRC8C_MOUSE	Lrrc8a;Lrrc8c	Volume-regulated anion channel subunit LRRC8A	880.213	NA	NA	NA	NA	NA
Q80WM4	Q80WM4	HPLN4_MOUSE	Hapln4	Hyaluronan and proteoglycan link protein 4	NA	NA	NA	11454.7	43634.9	NA
Q80X73	Q80X73	PELO_MOUSE	Pelo	Protein pelota homolog	1898.98	NA	NA	NA	NA	NA
Q80XI3	Q80XI3;A0A0R4J112;A2AMI7;A0A0N4SVL0;A2AMI2;Z4YKC4	IF4G3_MOUSE	Eif4g3	Eukaryotic translation initiation factor 4 gamma 3	2471.17	707.706	858.624	NA	NA	NA
Q80XI4	Q80XI4	PI42B_MOUSE	Pip4k2b	Phosphatidylinositol 5-phosphate 4-kinase type-2 beta	487.818	202.679	577.485	NA	NA	NA
Q8BFR1	Q8BFR1	ZCCHL_MOUSE	Zc3hav1l	Zinc finger CCCH-type antiviral protein 1-like	2295.15	NA	1234.55	NA	NA	NA
Q8BGD9	Q8BGD9	IF4B_MOUSE	Eif4b	Eukaryotic translation initiation factor 4B	1674.99	NA	869.828	NA	NA	NA
Q8BGE4	Q8BGE4;Q8C0M5	SUSD6_MOUSE	Susd6	Sushi domain-containing protein 6	2404.28	5969.59	18406	NA	NA	NA
Q8BGK6;Q9Z127	Q8BGK6;Q9Z127	LAT1_MOUSE;YLAT2_MOUSE	Slc7a5;Slc7a6	Y+L amino acid transporter 2	9242.62	NA	3492.78	NA	NA	NA
Q8BGP5	Q8BGP5;G3UXI2	TM127_MOUSE	Tmem127	Transmembrane protein 127	NA	NA	6049.53	NA	NA	NA
Q8BGS2	Q8BGS2	BOLA2_MOUSE	Bola2	BolA-like protein 2	2507.47	1768.24	1320.17	NA	NA	NA
Q8BGX0	Q8BGX0	TRI23_MOUSE	Trim23	E3 ubiquitin-protein ligase TRIM23	NA	NA	NA	NA	NA	3796.13
Q8BH44	Q8BH44;G3UWZ2	COR2B_MOUSE	Coro2b	Coronin-2B	1697.59	2672.83	1089.46	NA	NA	NA
Q8BHL7	Q8BHL7	C42S1_MOUSE	Cdc42se1	CDC42 small effector protein 1	NA	NA	5754.01	NA	NA	NA
Q8BKG3	Q8BKG3	PTK7_MOUSE	Ptk7	Inactive tyrosine-protein kinase 7	3401.86	3606.05	2703.6	NA	NA	NA
Q8BKX6	Q8BKX6	SMG1_MOUSE	Smg1	Serine/threonine-protein kinase SMG1	593.659	NA	NA	NA	NA	NA
Q8BLN5	Q8BLN5	LSS_MOUSE	Lss	Lanosterol synthase	1467.04	2102.59	1840.58	NA	NA	NA
Q8BMP6	Q8BMP6;A0A0R4J079	GCP60_MOUSE	Acbd3	Golgi resident protein GCP60	4333.74	125.235	NA	NA	NA	NA
Q8BND5	Q8BND5	QSOX1_MOUSE	Qsox1	Sulfhydryl oxidase 1	3883.1	NA	2446.8	NA	NA	NA
Q8BNJ6	Q8BNJ6;B2RXQ6	NETO2_MOUSE	Neto2	Neuropilin and tolloid-like protein 2	2631.99	788.938	NA	NA	NA	NA
Q8BQ30	Q8BQ30	PPR18_MOUSE	Ppp1r18	Phostensin	1837.67	3031.73	3502.25	NA	NA	NA
Q8BRH0	Q8BRH0;G5E8C4	TMTC3_MOUSE	Tmtc3	Protein O-mannosyl-transferase TMTC3	4764.81	NA	1364.67	NA	NA	NA
Q8BRX9	Q8BRX9;F8WJC4	MARH3_MOUSE	Marchf3	E3 ubiquitin-protein ligase MARCHF3	NA	5907.75	3418.49	NA	NA	NA
Q8BTU1	Q8BTU1	CFA20_MOUSE	Cfap20	Cilia- and flagella-associated protein 20	3154.06	4532.94	2930.75	NA	NA	NA
Q8BU14	Q8BU14	SEC62_MOUSE	Sec62	Translocation protein SEC62	852.885	761.985	1308.79	NA	NA	NA
Q8BUL6	Q8BUL6;F6YLP9;D6RCU3;D3YU01	PKHA1_MOUSE	Plekha1	Pleckstrin homology domain-containing family A member 1	2310.86	244.624	1545.43	NA	NA	NA
Q8BUN5	Q8BUN5;Q62432;Q9JIW5;E9Q3M0;F7BUP2;A2CG44;E9Q5P9	SMAD3_MOUSE	Smad3	Mothers against decapentaplegic homolog 3	1580.76	2188.9	1074.28	NA	NA	NA
Q8BVP5	Q8BVP5;Q99K78	KC1G2_MOUSE	Csnk1g2	Casein kinase I isoform gamma-2	679.772	NA	2235.31	NA	NA	NA
Q8BWF2	Q8BWF2	GIMA5_MOUSE	Gimap5	GTPase IMAP family member 5	3566.66	NA	NA	NA	NA	NA
Q8BWL5;Q91W59	Q8BWL5;Q91W59;A0A6I8MX12;G3UZJ9;E9PZ21	RBMS1_MOUSE;RBMS3_MOUSE	Rbms1;Rbms3	RNA-binding motif, single-stranded-interacting protein 3	679.867	1083.76	NA	NA	NA	NA
Q8BX43	Q8BX43	TR19L_MOUSE	Relt	Tumor necrosis factor receptor superfamily member 19L	3556.67	1345.08	3795.22	NA	NA	NA
Q8BYH7	Q8BYH7;I6L974	TBC17_MOUSE	Tbc1d17	TBC1 domain family member 17	1305.27	NA	NA	NA	NA	NA
Q8BZX4	Q8BZX4;A0A1B0GSB4;A0A1B0GSR3	SREK1_MOUSE	Srek1	Splicing regulatory glutamine/lysine-rich protein 1	377.828	329.767	455.945	NA	NA	NA
Q8C1Q4	Q8C1Q4;A0A494B937	METRN_MOUSE	Metrn	Meteorin	1015.01	NA	NA	NA	NA	NA
Q8C1Y8	Q8C1Y8	CCZ1_MOUSE	Ccz1	Vacuolar fusion protein CCZ1 homolog	581.996	NA	304.21	NA	NA	NA
Q8C2K5	Q8C2K5;A0A0R4J1U7;D3Z6Z7	RASL3_MOUSE	Rasal3	RAS protein activator like-3	24871.6	25761.8	27715.9	NA	NA	NA
Q8C6G8	Q8C6G8;A0A494BB75;E0CYH4	WDR26_MOUSE	Wdr26	WD repeat-containing protein 26	3026.09	NA	125.789	NA	NA	NA
Q8C754	Q8C754;G3UY33	VPS52_MOUSE	Vps52	Vacuolar protein sorting-associated protein 52 homolog	722.386	953.561	NA	NA	NA	NA
Q8C845	Q8C845	Q8C845_MOUSE	Efhd2	EF-hand domain-containing protein D2	315.551	NA	NA	NA	NA	NA
Q8CF89	Q8CF89	TAB1_MOUSE	Tab1	TGF-beta-activated kinase 1 and MAP3K7-binding protein 1	862.862	NA	1850.96	NA	NA	NA
Q8CFU0	Q8CFU0	Q8CFU0_MOUSE	Tmem198b	Transmembrane protein 198b	6054.21	1659.18	4596.45	NA	NA	NA
Q8CI04	Q8CI04;E9QL65	COG3_MOUSE	Cog3	Conserved oligomeric Golgi complex subunit 3	550.028	308.655	279.599	NA	NA	NA
Q8CI94;Q9ET01	Q8CI94;Q9WUB3;Q9ET01;Q3UEJ6;E9PUM3	PYGB_MOUSE;PYGL_MOUSE	Pygb;Pygl	Glycogen phosphorylase, brain form	588.617	NA	8500.74	NA	NA	NA
Q8CIA9	Q8CIA9	MF14B_MOUSE	Mfsd14b	Hippocampus abundant transcript-like protein 1	763.61	348.704	2622.77	NA	NA	NA
Q8CIZ8	Q8CIZ8;E9QPU1	VWF_MOUSE	Vwf	von Willebrand factor	3994.09	NA	NA	NA	NA	NA
Q8K019	Q8K019;F8WI22;A0A087WQA0;A0A087WRF8;A0A087WRN1	BCLF1_MOUSE	Bclaf1	Bcl-2-associated transcription factor 1	1180.78	314.043	580.219	NA	NA	NA
Q8K183	Q8K183	PDXK_MOUSE	Pdxk	Pyridoxal kinase	2856.16	NA	1201.97	NA	NA	NA
Q8K1G2	Q8K1G2	LBN_MOUSE	Evc2	Limbin	2325.24	NA	1420.05	NA	NA	NA
Q8K1I3	Q8K1I3	SPP24_MOUSE	Spp2	Secreted phosphoprotein 24	44295.2	1048.75	27758.1	NA	NA	NA
Q8K224	Q8K224	NAT10_MOUSE	Nat10	RNA cytidine acetyltransferase	NA	NA	827.8	NA	NA	NA
Q8K245	Q8K245	UVRAG_MOUSE	Uvrag	UV radiation resistance-associated protein	829.676	569.332	NA	NA	NA	NA
Q8K2H2	Q8K2H2;A0A0A0MQF5	OTU6B_MOUSE	Otud6b	Deubiquitinase OTUD6B	613.413	1799.8	NA	NA	NA	NA
Q8K2T1	Q8K2T1;D3YU12;G5E8S7	NMRL1_MOUSE	Nmral1	NmrA-like family domain-containing protein 1	6140.31	2512.23	3083.2	NA	NA	NA
Q8K4B0;Q924K8;Q9R190	Q924K8;Q8K4B0;Q9R190;F8WHY8;Q3U3A7;E9PX23;Q3UII8;H3BLE1;E9Q794	MTA1_MOUSE;MTA2_MOUSE;MTA3_MOUSE	Mta1;Mta2;Mta3	Metastasis-associated protein MTA1	945.408	1114.03	NA	NA	NA	NA
Q8K595	Q8K595	MCLN2_MOUSE	Mcoln2	Mucolipin-2	1228.85	147.599	NA	NA	NA	NA
Q8R0I4	Q8R0I4	TM2D2_MOUSE	Tm2d2	TM2 domain-containing protein 2	2426.48	9577.42	3790.91	NA	NA	NA
Q8R0W0;Q9QXS1	Q8R0W0;Q9QXS1;E9Q3W4;A0A3B2W7J8;A0A2I3BRT4	EPIPL_MOUSE;PLEC_MOUSE	Eppk1;Plec	Epiplakin	NA	287.969	197.175	NA	NA	NA
Q8R1V4;Q99KF1	Q99KF1;Q8R1V4	TMED4_MOUSE;TMED9_MOUSE	Tmed4;Tmed9	Transmembrane emp24 domain-containing protein 4	6771.28	1053.74	4729.44	NA	NA	NA
Q8R2U0	Q8R2U0	SEH1_MOUSE	Seh1l	Nucleoporin SEH1	337.374	NA	NA	NA	NA	NA
Q8R3V6	Q8R3V6;F2Z3X3	CUED1_MOUSE	Cuedc1	CUE domain-containing protein 1	1286.39	NA	297.763	NA	NA	NA
Q8R4R6	Q8R4R6	NUP35_MOUSE	Nup35	Nucleoporin NUP35	1035.03	438.41	853.495	NA	NA	NA
Q8R570	Q8R570;B2FDF6	SNP47_MOUSE	Snap47	Synaptosomal-associated protein 47	580.181	1597.56	713.664	NA	NA	NA
Q8VBV7	Q8VBV7	CSN8_MOUSE	Cops8	COP9 signalosome complex subunit 8	3068.7	NA	1374.49	NA	NA	NA
Q8VBW6	Q8VBW6;E0CZE0	ULA1_MOUSE	Nae1	NEDD8-activating enzyme E1 regulatory subunit	2101.12	NA	NA	NA	NA	NA
Q8VC85	Q8VC85	LSM1_MOUSE	Lsm1	U6 snRNA-associated Sm-like protein LSm1	596.152	NA	NA	NA	NA	NA
Q8VCA8	Q8VCA8;A2A709	SCRN2_MOUSE	Scrn2	Secernin-2	4061	NA	2393.01	NA	NA	NA
Q8VCR7	Q8VCR7;E9QN99;A0A087WP24;A0A087WPF8;A0A087WRJ2;A0A087WSR2	ABHEB_MOUSE	Abhd14b	Protein ABHD14B	3065.57	NA	2132.72	NA	NA	NA
Q8VCS0	Q8VCS0;A0A494BB01;A0A498WFR9	PGRP2_MOUSE	Pglyrp2	N-acetylmuramoyl-L-alanine amidase	3042.04	977.47	572.476	NA	NA	NA
Q8VDP6	Q8VDP6;A0A0U1RQ57;A0A0U1RNI6;A0A0U1RP13;A0A0U1RP60;A0A0U1RPV3	CDIPT_MOUSE	Cdipt	CDP-diacylglycerol--inositol 3-phosphatidyltransferase	2379.14	1878.42	941.277	NA	NA	NA
Q8VDQ1	Q8VDQ1;Q3TXN1	PTGR2_MOUSE	Ptgr2	Prostaglandin reductase 2	1774.02	2994.81	2352.87	NA	NA	NA
Q8VE73	Q8VE73;E9Q6H4	CUL7_MOUSE	Cul7	Cullin-7	528.766	NA	414.372	NA	NA	NA
Q8VEE0	Q8VEE0;B2KGF0	RPE_MOUSE	Rpe	Ribulose-phosphate 3-epimerase	562.023	NA	408.292	NA	NA	NA
Q8VEM8	Q8VEM8;G5E902	MPCP_MOUSE	Slc25a3	Phosphate carrier protein, mitochondrial	755.369	NA	1943.23	NA	NA	NA
Q8VI63	Q8VI63;A0A1B0GR18	MOB2_MOUSE	Mob2	MOB kinase activator 2	2750.58	753.406	NA	NA	NA	NA
Q8VIK5	Q8VIK5	PEAR1_MOUSE	Pear1	Platelet endothelial aggregation receptor 1	NA	NA	NA	NA	2891.75	1554.34
Q91X21	Q91X21	K2013_MOUSE	Kiaa2013	Uncharacterized protein KIAA2013	336.422	NA	429.705	NA	NA	NA
Q91X52	Q91X52;A2AC16	DCXR_MOUSE	Dcxr	L-xylulose reductase	5719.08	189.926	6852.15	NA	NA	NA
Q91X58	Q91X58;A0A087WPF5;E0CY18	ZFN2B_MOUSE	Zfand2b	AN1-type zinc finger protein 2B	1902.25	116.843	NA	NA	NA	NA
Q91XI1	Q91XI1;A0A0R4IZY9	DUS3L_MOUSE	Dus3l	tRNA-dihydrouridine(47) synthase [NAD(P)(+)]-like	10748.8	NA	NA	NA	NA	NA
Q91XU3	Q91XU3	PI42C_MOUSE	Pip4k2c	Phosphatidylinositol 5-phosphate 4-kinase type-2 gamma	870.874	487.154	859.719	NA	NA	NA
Q91XX3	Q91XX3	Q91XX3_MOUSE	Pcdhgb7	Protocadherin gamma B7	2130.41	1154.76	4072.78	NA	NA	NA
Q91YR5	Q91YR5	EFNMT_MOUSE	EEF1AKNMT	eEF1A lysine and N-terminal methyltransferase	1063.5	NA	921.601	NA	NA	NA
Q91Z53	Q91Z53;B1AXQ0;D6REG4	GRHPR_MOUSE	Grhpr	Glyoxylate reductase/hydroxypyruvate reductase	960.032	3074.18	NA	NA	NA	NA
Q91Z69	Q91Z69;D3YZW1	SRGP1_MOUSE	Srgap1	SLIT-ROBO Rho GTPase-activating protein 1	NA	NA	784.415	NA	NA	NA
Q921F4	Q921F4	HNRLL_MOUSE	Hnrnpll	Heterogeneous nuclear ribonucleoprotein L-like	NA	NA	NA	611.19	NA	NA
Q921V5	Q921V5	MGAT2_MOUSE	Mgat2	Alpha-1,6-mannosyl-glycoprotein 2-beta-N-acetylglucosaminyltransferase	3733.3	772.871	2467.94	NA	NA	NA
Q921Y2	Q921Y2	IMP3_MOUSE	Imp3	U3 small nucleolar ribonucleoprotein protein IMP3	963.116	NA	NA	NA	NA	NA
Q922F4;Q9ERD7	Q9ERD7;Q922F4	TBB3_MOUSE;TBB6_MOUSE	Tubb3;Tubb6	Tubulin beta-6 chain	9220.66	NA	NA	NA	NA	NA
Q922Y1	Q922Y1;A0A498WFS2	UBXN1_MOUSE	Ubxn1	UBX domain-containing protein 1	1926.2	NA	1979.34	NA	NA	NA
Q923Z0	Q923Z0;D2DFA9	GPC5B_MOUSE	Gprc5b	G-protein coupled receptor family C group 5 member B	1348.13	2648.52	619.003	NA	NA	NA
Q924S7	Q924S7;Q5SRF9;Q5SRF8	SPRE2_MOUSE	Spred2	Sprouty-related, EVH1 domain-containing protein 2	1457.51	NA	NA	NA	NA	NA
Q99J09	Q99J09;F7D5L2	MEP50_MOUSE	Wdr77	Methylosome protein 50	1150.72	504.741	NA	NA	NA	NA
Q99JZ0	Q99JZ0	SDCB2_MOUSE	Sdcbp2	Syntenin-2	884.519	NA	1496.42	NA	NA	NA
Q99KN2	Q99KN2;G3UYR5	CIAO1_MOUSE	Ciao1	Probable cytosolic iron-sulfur protein assembly protein CIAO1	281.325	NA	NA	NA	NA	NA
Q99KW3	Q99KW3;A0A2U3TZ82	TARA_MOUSE	Triobp	TRIO and F-actin-binding protein	1533.12	882.474	614.301	NA	NA	NA
Q99L20	Q99L20;G3UYJ7;G3UX05;G3UYL6	GSTT3_MOUSE	Gstt3	Glutathione S-transferase theta-3	1113.38	449.491	181.763	NA	NA	NA
Q99LB2	Q99LB2;Q9D2U3;A0A2I3BQ25;A0A2I3BPY3;A0A2I3BRG8	DHRS4_MOUSE	Dhrs4	Dehydrogenase/reductase SDR family member 4	373.732	NA	513.157	NA	NA	NA
Q99LB6	Q99LB6;E0CYU5	MAT2B_MOUSE	Mat2b	Methionine adenosyltransferase 2 subunit beta	2785.4	NA	778.503	NA	NA	NA
Q99LR1	Q99LR1;D6RI21;D6RFU2	ABD12_MOUSE	Abhd12	Lysophosphatidylserine lipase ABHD12	704.498	170.332	572.757	NA	NA	NA
Q99LU0	Q99LU0	CH1B1_MOUSE	Chmp1b1	Charged multivesicular body protein 1b-1	13466.1	NA	876.699	NA	NA	NA
Q99M31	Q99M31	HSP7E_MOUSE	Hspa14	Heat shock 70 kDa protein 14	1932.55	NA	NA	NA	NA	NA
Q99M73	Q99M73	KRT84_MOUSE	Krt84	Keratin, type II cuticular Hb4	NA	NA	NA	1518.92	NA	NA
Q99NH2	Q99NH2;Q4JJC0;B7ZNY3;E0CXL4;A5D6P2;E0CX45;A0A0R4J1Y4;E0CZ83;F6S7Z1;E0CZE2;E9PYJ2;E0CY24;F6UGU7;G3XA13;F6TSJ9;E0CXR8	PARD3_MOUSE	Pard3	Partitioning defective 3 homolog	62065.3	111159	99623.2	NA	NA	NA
Q99P31	Q99P31;A0A0U1RPE7;A0A0U1RPF2;A0A0U1RQ49	HPBP1_MOUSE	Hspbp1	Hsp70-binding protein 1	1539.95	NA	NA	NA	NA	NA
Q9CQ40	Q9CQ40	RM49_MOUSE	Mrpl49	39S ribosomal protein L49, mitochondrial	969.709	NA	NA	NA	NA	NA
Q9CQC9	Q9CQC9	SAR1B_MOUSE	Sar1b	GTP-binding protein SAR1b	1714.39	NA	NA	NA	NA	NA
Q9CQD4	Q9CQD4	CH1B2_MOUSE	Chmp1b2	Charged multivesicular body protein 1b-2	26013.2	NA	1565.88	NA	NA	NA
Q9CQF6	Q9CQF6	ADPPT_MOUSE	Aasdhppt	L-aminoadipate-semialdehyde dehydrogenase-phosphopantetheinyl transferase	369.115	NA	NA	NA	NA	NA
Q9CQI7	Q9CQI7;A2CES4	RU2B_MOUSE	Snrpb2	U2 small nuclear ribonucleoprotein B''	2343.87	NA	686.598	NA	NA	NA
Q9CQV4	Q9CQV4	RETR3_MOUSE	Retreg3	Reticulophagy regulator 3	2380.37	1585.07	3940.37	NA	NA	NA
Q9CR67	Q9CR67;A0A0R4J1Z3;Q9CZM3;A0A0J9YV78	TMM33_MOUSE	Tmem33	Transmembrane protein 33	1822.72	390.003	2065.92	NA	NA	NA
Q9CRC8	Q9CRC8;A0A0R4J0W6	LRC40_MOUSE	Lrrc40	Leucine-rich repeat-containing protein 40	1169.06	NA	NA	NA	NA	NA
Q9CRD2	Q9CRD2	EMC2_MOUSE	Emc2	ER membrane protein complex subunit 2	1724.71	2380.43	1625.6	NA	NA	NA
Q9CWR1	Q9CWR1;F6RXX6	WDR73_MOUSE	Wdr73	WD repeat-containing protein 73	438.375	NA	NA	NA	NA	NA
Q9CWX9	Q9CWX9;F6QKD2;A0A0N4SVT1;A0A0N4SWC5	DDX47_MOUSE	Ddx47	Probable ATP-dependent RNA helicase DDX47	970.566	NA	312.432	NA	NA	NA
Q9CX34	Q9CX34	SGT1_MOUSE	Sugt1	Protein SGT1 homolog	NA	NA	NA	NA	NA	727.044
Q9CXY9	Q9CXY9;Q8BL63;Q8BXX3;E9Q421	GPI8_MOUSE	Pigk	GPI-anchor transamidase	624.946	856.856	405.303	NA	NA	NA
Q9CY66	Q9CY66;F6SL78;D3YZ09	GAR1_MOUSE	Gar1	H/ACA ribonucleoprotein complex subunit 1	2070.09	NA	NA	NA	NA	NA
Q9CZB2	Q9CZB2	Q9CZB2_MOUSE	Pmel	Melanocyte protein PMEL	6814.14	NA	7598.36	NA	NA	NA
Q9CZW5	Q9CZW5	TOM70_MOUSE	Tomm70	Mitochondrial import receptor subunit TOM70	NA	584.715	NA	NA	NA	NA
Q9D0B6	Q9D0B6	PBDC1_MOUSE	Pbdc1	Protein PBDC1	1859.98	2246.88	1364.12	NA	NA	NA
Q9D0M3	Q9D0M3	CY1_MOUSE	Cyc1	Cytochrome c1, heme protein, mitochondrial	NA	NA	NA	NA	NA	NA
Q9D0P7	Q9D0P7;A2AEF3	PSRC1_MOUSE	Psrc1	Proline/serine-rich coiled-coil protein 1	1113.71	1125.38	1595.83	NA	NA	NA
Q9D0R4	Q9D0R4;Q5SVX2	DDX56_MOUSE	Ddx56	Probable ATP-dependent RNA helicase DDX56	1078.98	NA	792.054	NA	NA	NA
Q9D142	Q9D142;A0A1Y7VLW5;A0A217FL49	NUD14_MOUSE	Nudt14	Uridine diphosphate glucose pyrophosphatase NUDT14	1019.39	NA	NA	NA	NA	NA
Q9D312	Q9D312	K1C20_MOUSE	Krt20	Keratin, type I cytoskeletal 20	NA	NA	NA	3222.45	NA	NA
Q9D6Y9	Q9D6Y9;F6ZHD8;G3UW30	GLGB_MOUSE	Gbe1	1,4-alpha-glucan-branching enzyme	5255.78	1983.68	3730.05	NA	NA	NA
Q9D7G0	Q9D7G0;G3UXL2	PRPS1_MOUSE	Prps1	Ribose-phosphate pyrophosphokinase 1	1330.87	NA	NA	NA	NA	NA
Q9D7S7	Q9D7S7	RL22L_MOUSE	Rpl22l1	60S ribosomal protein L22-like 1	1600.77	NA	2264.72	NA	NA	NA
Q9D8U0	Q9D8U0	Q9D8U0_MOUSE	Ifrd2	Interferon-related developmental regulator 2	1786.35	1651.88	NA	NA	NA	NA
Q9D8X1	Q9D8X1;F8WHX2;D3YY50	CUTC_MOUSE	Cutc	Copper homeostasis protein cutC homolog	403.083	NA	NA	NA	NA	NA
Q9DB75	Q9DB75;F6X7Q6	CDIP1_MOUSE	Cdip1	Cell death-inducing p53-target protein 1	1633.16	7143.1	7468.77	NA	NA	NA
Q9DBV4	Q9DBV4	MXRA8_MOUSE	Mxra8	Matrix remodeling-associated protein 8	1276.72	942.044	611.267	NA	NA	NA
Q9DC11	Q9DC11;B1AY86;B1AY85	PXDC2_MOUSE	Plxdc2	Plexin domain-containing protein 2	928.726	NA	140.743	NA	NA	NA
Q9DCG6	Q9DCG6;K3W4L7	PBLD1_MOUSE	Pbld1	Phenazine biosynthesis-like domain-containing protein 1	20019.8	12432.1	8846.76	NA	NA	NA
Q9DCG9	Q9DCG9;Q8VCR4	TR112_MOUSE	Trmt112	Multifunctional methyltransferase subunit TRM112-like protein	1355.88	2896.52	2845.37	NA	NA	NA
Q9DCQ2	Q9DCQ2;F6S4J6;D3Z253	ASPD_MOUSE	Aspdh	Putative L-aspartate dehydrogenase	1458.59	NA	NA	NA	NA	NA
Q9DCW4	Q9DCW4;A0A0U1RNR3;A0A0N4SVE0;A0A0U1RNP5;A0A0N4SWE9	ETFB_MOUSE	Etfb	Electron transfer flavoprotein subunit beta	1394.69	152.373	336.899	NA	NA	NA
Q9DCZ9	Q9DCZ9;Q4R1J7	APH1C_MOUSE	Aph1c	Putative gamma-secretase subunit APH-1C	2596.6	1309.84	824.769	NA	NA	NA
Q9EPN1	Q9EPN1;A0A5F8MPY6	NBEA_MOUSE	Nbea	Neurobeachin	313.283	NA	NA	NA	NA	NA
Q9EQQ2	Q9EQQ2	YIPF5_MOUSE	Yipf5	Protein YIPF5	1135.75	NA	335.635	NA	NA	NA
Q9EQS3	Q9EQS3;A2A7K5	MYCBP_MOUSE	Mycbp	c-Myc-binding protein	1007.56	NA	NA	NA	NA	NA
Q9ES00	Q9ES00;G3UZD6;A0A5F8MP95;A0A571BD95	UBE4B_MOUSE	Ube4b	Ubiquitin conjugation factor E4 B	1541.16	260.955	NA	NA	NA	NA
Q9JHJ0	Q9JHJ0	TMOD3_MOUSE	Tmod3	Tropomodulin-3	NA	NA	1069.28	NA	NA	NA
Q9JHK4	Q9JHK4;A0A2K6EDL0	PGTA_MOUSE	Rabggta	Geranylgeranyl transferase type-2 subunit alpha	1999.35	NA	NA	NA	NA	NA
Q9JHL1	Q9JHL1;Q6NS54;A0A0R4IZX2;A0A3Q4EHM9;A0A3Q4EBU8;A0A0R4J006	NHRF2_MOUSE	Slc9a3r2	Na(+)/H(+) exchange regulatory cofactor NHE-RF2	954.44	1393.43	1390.94	NA	NA	NA
Q9JI08	Q9JI08	BIN3_MOUSE	Bin3	Bridging integrator 3	1546.37	1806.66	1389.65	NA	NA	NA
Q9JI18	Q9JI18;A2API5;E9Q202	LRP1B_MOUSE	Lrp1b	Low-density lipoprotein receptor-related protein 1B	NA	6450.57	NA	NA	NA	NA
Q9JI59	Q9JI59;A0A338P721	JAM2_MOUSE	Jam2	Junctional adhesion molecule B	206.263	814.233	399.21	NA	NA	NA
Q9JIA7	Q9JIA7	SPHK2_MOUSE	Sphk2	Sphingosine kinase 2	341.233	NA	NA	NA	NA	NA
Q9JIG8	Q9JIG8	PRAF2_MOUSE	Praf2	PRA1 family protein 2	1218.41	2501.87	4614.75	NA	NA	NA
Q9JJ80	Q9JJ80;S4R1Y5;S4R2R2;G3X926;S4R2H5	RPF2_MOUSE	Rpf2	Ribosome production factor 2 homolog	1028.21	NA	1008.83	NA	NA	NA
Q9JKV5	Q9JKV5	SCAM4_MOUSE	Scamp4	Secretory carrier-associated membrane protein 4	850.472	1434.99	11632.9	NA	NA	NA
Q9JL56	Q9JL56;A0A140LJK8;A0A140LJJ4	GDE1_MOUSE	Gde1	Glycerophosphodiester phosphodiesterase 1	1383.84	NA	908.723	NA	NA	NA
Q9JLB0;Q9WV34	Q9JLB0;Q9WV34	MPP2_MOUSE;MPP6_MOUSE	Mpp2;Mpp6	MAGUK p55 subfamily member 6	4174.65	NA	7143.77	NA	NA	NA
Q9JLG8	Q9JLG8;A0A1D5RLS3;A0A1D5RLJ4	CAN15_MOUSE	Capn15	Calpain-15	1188.19	635.985	NA	NA	NA	NA
Q9JLI2	Q9JLI2	Q9JLI2_MOUSE	Col5a3	Collagen type V alpha 3 chain	901.587	56.4725	NA	NA	NA	NA
Q9JM99	Q9JM99;A0A0R4J207;E0CZ58;E9QQ17;E9QQ18	PRG4_MOUSE	Prg4	Proteoglycan 4	4192.34	21115.7	5475.1	NA	NA	NA
Q9QXT5	Q9QXT5;Q3UTJ7;E9Q4M7;F6W8P4;G3UZH9	EGFL7_MOUSE	Egfl7	Epidermal growth factor-like protein 7	1948.01	739.415	1657.62	NA	NA	NA
Q9QY01	Q9QY01	ULK2_MOUSE	Ulk2	Serine/threonine-protein kinase ULK2	1981.1	NA	NA	NA	NA	NA
Q9QZ08	Q9QZ08;D3YXG2;Q9D997	NAGK_MOUSE	Nagk	N-acetyl-D-glucosamine kinase	1451.71	804.018	NA	NA	NA	NA
Q9QZM0	Q9QZM0;Q8R317;Q99NB8	UBQL2_MOUSE	Ubqln2	Ubiquilin-2	2653.89	3343.95	1946.67	NA	NA	NA
Q9QZN1	Q9QZN1;Q7TNS5	FXL17_MOUSE	Fbxl17	F-box/LRR-repeat protein 17	NA	1625.83	1304.23	NA	NA	NA
Q9QZZ6	Q9QZZ6	DERM_MOUSE	Dpt	Dermatopontin	4163.82	1545.54	5705.18	NA	NA	NA
Q9WTN6;Q9Z0E8	Q9WTN6;Q9Z0E8	S22A5_MOUSE;S22AL_MOUSE	Slc22a21;Slc22a5	Solute carrier family 22 member 21	2953.74	118.579	1818.75	NA	NA	NA
Q9WTZ1	Q9WTZ1;D3Z497	RBX2_MOUSE	Rnf7	RING-box protein 2	398.011	NA	472.757	NA	NA	NA
Q9WUB3	Q9WUB3;E9PUM3	PYGM_MOUSE	Pygm	Glycogen phosphorylase, muscle form	497.696	NA	NA	NA	NA	NA
Q9WUT3	Q9WUT3;A0A338P701	KS6A2_MOUSE	Rps6ka2	Ribosomal protein S6 kinase alpha-2	1591.23	NA	245.933	NA	NA	NA
Q9WVR4	Q9WVR4;Q6P5B5	FXR2_MOUSE	Fxr2	Fragile X mental retardation syndrome-related protein 2	4283.76	4288.15	5709.09	NA	NA	NA
Q9Z0E0	Q9Z0E0	NCDN_MOUSE	Ncdn	Neurochondrin	284.579	313.796	NA	NA	NA	NA
Q9Z0H3	Q9Z0H3	SNF5_MOUSE	Smarcb1	SWI/SNF-related matrix-associated actin-dependent regulator of chromatin subfamily B member 1	358.245	NA	178.592	NA	NA	NA
Q9Z160	Q9Z160	COG1_MOUSE	Cog1	Conserved oligomeric Golgi complex subunit 1	979.582	464.414	229.789	NA	NA	NA
Q9Z1K5	Q9Z1K5;H7BWY7	ARI1_MOUSE	Arih1	E3 ubiquitin-protein ligase ARIH1	793.113	NA	796.962	NA	NA	NA
Q9Z1K6	Q9Z1K6;A0A0A6YXB0	ARI2_MOUSE	Arih2	E3 ubiquitin-protein ligase ARIH2	467.494	NA	NA	NA	NA	NA
Q9Z222	Q9Z222	B3GN2_MOUSE	B3GNT2	N-acetyllactosaminide beta-1,3-N-acetylglucosaminyltransferase 2	1210.48	NA	NA	NA	NA	NA
Q9Z2N8	Q9Z2N8;A0A0A6YWG8;D3YVN1	ACL6A_MOUSE	Actl6a	Actin-like protein 6A	2179.54	NA	1381.9	NA	NA	NA
Q9Z2V5	Q9Z2V5;A0A1B0GX25	HDAC6_MOUSE	Hdac6	Histone deacetylase 6	650.064	NA	NA	NA	NA	NA
A0A494BBN3;Q2TA50	Q2TA50;A0A494BBN3	A0A494BBN3_MOUSE;Q2TA50_MOUSE	Mlana	Melan-A	93152.9	330926	304117	1352.67	NA	1003.92
Q02105	Q02105	C1QC_MOUSE	C1qc	Complement C1q subcomponent subunit C	72228.1	8852.81	50121.8	402.771	NA	NA
P68372;P99024;Q9D6F9	Q9D6F9;P99024;P68372	TBB4A_MOUSE;TBB4B_MOUSE;TBB5_MOUSE	Tubb4a;Tubb4b;Tubb5	Tubulin beta-4B chain	110741	6596.13	43876.9	NA	NA	575.064
Q9CQN1	Q9CQN1	TRAP1_MOUSE	Trap1	Heat shock protein 75 kDa, mitochondrial	152713	NA	NA	NA	373.289	3180.44
P61079;P61080	P61080;P62838;P61079;A0A494BAN1;A0A494BA56;A0A0G2JGL0;A0A0G2JE32	UB2D1_MOUSE;UB2D3_MOUSE	Ube2d1;Ube2d3	Ubiquitin-conjugating enzyme E2 D3	22282.4	295.641	24850	241.339	NA	NA
Q61508	Q61508;F8WI14	ECM1_MOUSE	Ecm1	Extracellular matrix protein 1	31019.9	20665.3	44824.4	518.222	NA	NA
Q32NZ6	Q32NZ6	TMC5_MOUSE	Tmc5	Transmembrane channel-like protein 5	456082	290637	1460350	20385.2	NA	5443.07
Q9QZS0	Q9QZS0	CO4A3_MOUSE	Col4a3	Collagen alpha-3(IV) chain	11667.7	4395.93	NA	148.125	NA	NA
P62874;P62880;Q61011	Q61011;P62880;P62874;H3BKR2;H3BLF7;D3Z1M1;D3YZX3;D3Z1T4;E9QKR0	GBB1_MOUSE;GBB2_MOUSE;GBB3_MOUSE	Gnb1;Gnb2;Gnb3	Guanine nucleotide-binding protein G(I)/G(S)/G(T) subunit beta-1	52625.8	8794.59	4489.62	439.535	NA	NA
Q8R1K1	Q8R1K1	UBAC2_MOUSE	Ubac2	Ubiquitin-associated domain-containing protein 2	158235	343574	226099	14754.7	1125.54	408.007
O35682	O35682;A0A0N4SW94	MYADM_MOUSE	Myadm	Myeloid-associated differentiation marker	16514	35193.1	20949.1	555.479	NA	NA
C0HKE1;C0HKE2;C0HKE3;C0HKE4;C0HKE5;C0HKE6;C0HKE7;C0HKE8;C0HKE9;Q8BFU2;Q8CGP5;Q8CGP6;Q8CGP7;Q8R1M2	Q8BFU2;C0HKE8;C0HKE3;C0HKE9;C0HKE4;C0HKE1;Q8R1M2;Q8CGP6;C0HKE7;C0HKE2;C0HKE6;Q8CGP5;C0HKE5;Q8CGP7;Q8CGP4;A0A0N4SV66	H2A1B_MOUSE;H2A1C_MOUSE;H2A1D_MOUSE;H2A1E_MOUSE;H2A1F_MOUSE;H2A1G_MOUSE;H2A1H_MOUSE;H2A1I_MOUSE;H2A1K_MOUSE;H2A1N_MOUSE;H2A1O_MOUSE;H2A1P_MOUSE;H2A3_MOUSE;H2AJ_MOUSE	H2ac11;H2ac12;H2ac13;H2ac15;H2ac4;H2ac6;H2ac7;H2ac8;H2aj;H2aw;Hist1h2af;Hist1h2an;Hist1h2ao;Hist1h2ap	Histone H2A type 1-B	16693.7	781.054	12719.3	NA	NA	240.608
P60710;Q8BFZ3	Q8BFZ3;P63260;P60710;G3UZ07;E9Q5F4;E9Q1F2	ACTBL_MOUSE;ACTB_MOUSE	Actb;Actbl2	Actin, cytoplasmic 1	678480	180561	2376870	52779	14666.4	11348.8
O08810;P58252	P58252;O08810;G3UZ34;G3UXK8;A2AH85	EF2_MOUSE;U5S1_MOUSE	Eef2;Eftud2	116 kDa U5 small nuclear ribonucleoprotein component	119016	7372.24	32639.6	NA	NA	1366.2
P50446;Q3UV17;Q922U2	Q922U2;Q3UV17;P50446;Q8BGZ7;P07744;Q9Z331;Q3UV11	K22O_MOUSE;K2C5_MOUSE;K2C6A_MOUSE	Krt5;Krt6a;Krt76	Keratin, type II cytoskeletal 6A	NA	48532.5	6793.32	806.364	NA	NA
Q99J93;Q9CQW9	Q99J93;Q9CQW9;A0A1B0GT68	IFM2_MOUSE;IFM3_MOUSE	Ifitm2;Ifitm3	Interferon-induced transmembrane protein 2	20962.1	44189.7	71898.6	1317.05	1187.72	1518.48
Q9R1Q6	Q9R1Q6;A0A0N4SVT4;A0A0N4SUY1;A0A0N4SUS9;A0A0N4SV46	T176B_MOUSE	Tmem176b	Transmembrane protein 176B	88012.6	67526.1	207328	2874.49	2491.98	5463.7
P11440;P30285;P49615;P97377;Q3V3A1;Q8K0D0	Q04735;Q14AX6;Q3V3A1;P49615;Q69ZA1;P97377;P30285;Q99J95;Q04899;Q8K0D0;O35495;P11440;Q80YP0;Q64261;E9PZX7;E9Q9E4;D3Z2T9;E9PVC7;E3W997;A0A1Y7VLM0;A0A0G2JDL3;A0A1L1SUS7	CDK15_MOUSE;CDK17_MOUSE;CDK1_MOUSE;CDK2_MOUSE;CDK4_MOUSE;CDK5_MOUSE	Cdk1;Cdk15;Cdk17;Cdk2;Cdk4;Cdk5	Cyclin-dependent kinase 1	5669.28	14806.7	9900.37	286.213	NA	351.537
Q61781;Q6IFX2;Q9QWL7	Q61781;Q9QWL7;P19001;Q6IFX2;Q61414;B1AQ77	K1C14_MOUSE;K1C17_MOUSE;K1C42_MOUSE	Krt14;Krt17;Krt42	Keratin, type I cytoskeletal 14	3939.55	171598	18128.6	3131.7	2869.4	239.673
Q05895;Q9Z1T2	Q9Z1T2;Q05895;E9PWF0	TSP3_MOUSE;TSP4_MOUSE	Thbs3;Thbs4	Thrombospondin-3	20546.6	1267.68	4841.91	314.11	NA	NA
P70695	P70695	F16P2_MOUSE	Fbp2	Fructose-1,6-bisphosphatase isozyme 2	22411	4700.84	6916.47	404.609	NA	NA
Q03146;Q62371	Q62371;Q03146	DDR1_MOUSE;DDR2_MOUSE	Ddr1;Ddr2	Epithelial discoidin domain-containing receptor 1	8648.38	39236	41733	1188.58	NA	NA
P02089;P02104	P02089;P02088;P02104;A8DUK4;E9Q223	HBB2_MOUSE;HBE_MOUSE	Hbb-b2;Hbb-y	Hemoglobin subunit beta-2	892895	447232	1574320	103030	11117.3	6212.63
C0HKE1;C0HKE2;C0HKE3;C0HKE4;C0HKE5;C0HKE6;C0HKE7;C0HKE8;C0HKE9;P0C0S6;Q3THW5;Q64523;Q6GSS7;Q8BFU2;Q8CGP5;Q8CGP6;Q8CGP7;Q8R1M2	Q6GSS7;P27661;Q8BFU2;C0HKE8;C0HKE3;Q64523;C0HKE9;C0HKE4;Q3THW5;C0HKE1;Q8R1M2;Q8CGP6;C0HKE7;C0HKE2;C0HKE6;Q8CGP5;C0HKE5;Q8CGP7;P0C0S6;Q8CGP4;Q8R029;A0A0N4SV66	H2A1B_MOUSE;H2A1C_MOUSE;H2A1D_MOUSE;H2A1E_MOUSE;H2A1F_MOUSE;H2A1G_MOUSE;H2A1H_MOUSE;H2A1I_MOUSE;H2A1K_MOUSE;H2A1N_MOUSE;H2A1O_MOUSE;H2A1P_MOUSE;H2A2A_MOUSE;H2A2C_MOUSE;H2A3_MOUSE;H2AJ_MOUSE;H2AV_MOUSE;H2AZ_MOUSE	H2ac11;H2ac12;H2ac13;H2ac15;H2ac20;H2ac4;H2ac6;H2ac7;H2ac8;H2aj;H2aw;H2az1;H2az2;Hist1h2af;Hist1h2an;Hist1h2ao;Hist1h2ap;Hist2h2aa1	Histone H2A type 1-B	89473.4	11087.2	111915	3091.93	NA	2766.65
P41438	P41438	S19A1_MOUSE	Slc19a1	Reduced folate transporter	4915.07	488.056	3341.28	143.736	NA	NA
Q9Z0K8	Q9Z0K8	VNN1_MOUSE	Vnn1	Pantetheinase	54400.4	49812.9	56642	6133.88	1226.05	630.525
Q61090;Q9JIP6	Q61090;Q9JIP6	FZD2_MOUSE;FZD7_MOUSE	Fzd2;Fzd7	Frizzled-7	44385.3	18825.6	95999.6	2677.89	NA	NA
P47880	P47880	IBP6_MOUSE	Igfbp6	Insulin-like growth factor-binding protein 6	10614.5	1265.82	6794.82	326.209	NA	NA
A2A8L5;B0V2N1;Q64487	B0V2N1;A2A8L5;Q64487;Q5SPA9;B9EJA3;G3UY75;G3UX60;F6Y3V0;G3UYU6;G3UWK6;E9PVW8;F6S1X8;E9Q7I7	PTPRD_MOUSE;PTPRF_MOUSE;PTPRS_MOUSE	Ptprd;Ptprf;Ptprs	Receptor-type tyrosine-protein phosphatase F	33110.9	61331.3	79003.1	3059.85	NA	NA
Q60994	Q60994;E9PWU4	ADIPO_MOUSE	Adipoq	Adiponectin	51250.3	3893.55	2157.76	1960.93	779.264	303.885
Q61781;Q6IFX2;Q9D312;Q9QWL7;Q9Z2K1	Q8CCX5;Q61781;Q9QWL7;P08730;P19001;Q9Z2K1;Q6IFX2;Q61414;Q9D312;B1AQ77	K1C14_MOUSE;K1C16_MOUSE;K1C17_MOUSE;K1C20_MOUSE;K1C42_MOUSE	Krt14;Krt16;Krt17;Krt20;Krt42	Keratin, type I cytoskeletal 14	876.604	23111.4	1060.26	452.943	NA	NA
Q8BH64;Q9WVK4	Q9WVK4;Q8BH64	EHD1_MOUSE;EHD2_MOUSE	Ehd1;Ehd2	EH domain-containing protein 2	36891.4	34633.1	24997	3017.35	839.967	NA
P49182	P49182	HEP2_MOUSE	Serpind1	Heparin cofactor 2	53026.1	NA	88331.3	4516.56	NA	NA
Q61144	Q61144;Q3U4P5;A0A0R4J1F2;D3Z0X1	PSN2_MOUSE	Psen2	Presenilin-2	4772.8	3288.03	5447.37	323.999	NA	NA
Q7TS05	Q7TS05	Q7TS05_MOUSE	Olfr299	Olfactory receptor 299	45768.6	12640.8	11003.6	1794.76	NA	NA
Q6ZQM0	Q6ZQM0;Q3UCG9;B1AT06	RFFL_MOUSE	Rffl	E3 ubiquitin-protein ligase rififylin	3403.7	3483.63	2350.8	237.346	NA	250.29
Q7TPZ8	Q7TPZ8;B2RS76	CBPA1_MOUSE	Cpa1	Carboxypeptidase A1	23975.2	26091.7	11709.7	1653.63	NA	NA
A2AQ07;P68372;P99024;Q7TMM9;Q922F4;Q9CWF2;Q9D6F9;Q9ERD7	Q9D6F9;P99024;Q9ERD7;Q9CWF2;Q7TMM9;P68372;A2AQ07;Q922F4	TBB1_MOUSE;TBB2A_MOUSE;TBB2B_MOUSE;TBB3_MOUSE;TBB4A_MOUSE;TBB4B_MOUSE;TBB5_MOUSE;TBB6_MOUSE	Tubb1;Tubb2a;Tubb2b;Tubb3;Tubb4a;Tubb4b;Tubb5;Tubb6	Tubulin beta-1 chain	3534.25	12534	52101.1	3238.08	518.023	1988.91
Q3TUU5	Q3TUU5;D3Z094	TEX30_MOUSE	Tex30	Testis-expressed protein 30	696.739	NA	NA	NA	NA	62.8651
P21278;P21279;P27600;P27601;P30677	O70443;P21278;P27600;P30677;P21279;P27601;A0A0G2JG40;A0A494BBL5	GNA11_MOUSE;GNA12_MOUSE;GNA13_MOUSE;GNA14_MOUSE;GNAQ_MOUSE	Gna11;Gna12;Gna13;Gna14;Gnaq	Guanine nucleotide-binding protein subunit alpha-11	19441.5	59768	44417.3	NA	NA	3741.19
Q9JLZ6	Q9JLZ6	HIC2_MOUSE	Hic2	Hypermethylated in cancer 2 protein	773596	120995	15875.5	63604.8	7256.05	13772.7
O70423;Q812C9	O70423;Q812C9;A2A4I9;A2A4I8	AOC2_MOUSE;AOC3_MOUSE	Aoc2;Aoc3	Membrane primary amine oxidase	11036.9	4692.64	8744.37	758.504	NA	NA
O88947	O88947;Q3U3V1	FA10_MOUSE	F10	Coagulation factor X	35145.6	127443	103322	12593.2	4528.55	NA
P11247	P11247	PERM_MOUSE	Mpo	Myeloperoxidase	1267.46	6475.51	4629.04	418.803	NA	NA
P08103	P08103;F6UND7	HCK_MOUSE	Hck	Tyrosine-protein kinase HCK	NA	22490.1	NA	NA	2305.24	NA
Q8K0B2	Q8K0B2;A0A087WR85	LMBD1_MOUSE	Lmbrd1	Lysosomal cobalamin transport escort protein LMBD1	13004.1	9251.94	18738	1422.97	NA	NA
Q80UM7	Q80UM7	MOGS_MOUSE	Mogs	Mannosyl-oligosaccharide glucosidase	1966.9	NA	2364.45	228.84	NA	NA
P29319;Q03137	Q03137;P29319;Q60629;B7ZNN5;E9PUQ2;Q8BRB1;Q6PFV6;E9PUQ4;E9PUP9;E9PUQ0	EPHA3_MOUSE;EPHA4_MOUSE	Epha3;Epha4	Ephrin type-A receptor 3	52561.9	47341.5	73819.6	11567.4	718.615	NA
F8VQH7	F8VQH7	F8VQH7_MOUSE	Dbx2	Developing brain homeobox 2	5503.98	NA	NA	605.577	NA	NA
P68372;P99024;Q7TMM9;Q9CWF2;Q9D6F9;Q9ERD7	Q9D6F9;P99024;Q9ERD7;Q9CWF2;Q7TMM9;P68372	TBB2A_MOUSE;TBB2B_MOUSE;TBB3_MOUSE;TBB4A_MOUSE;TBB4B_MOUSE;TBB5_MOUSE	Tubb2a;Tubb2b;Tubb3;Tubb4a;Tubb4b;Tubb5	Tubulin beta-4B chain	37206.4	21008.2	8601.65	4189.83	742.308	NA
Q80Y86	Q80Y86	MK15_MOUSE	Mapk15	Mitogen-activated protein kinase 15	715.333	20742.8	NA	359.302	NA	2028.59
P42337	P42337;D3YY41	PK3CA_MOUSE	Pik3ca	Phosphatidylinositol 4,5-bisphosphate 3-kinase catalytic subunit alpha isoform	669.147	NA	NA	74.9855	NA	NA
Q6WVG3	Q6WVG3;A0A0R4J2B2	KCD12_MOUSE	Kctd12	BTB/POZ domain-containing protein KCTD12	5610.11	4074.5	10630.3	797.115	NA	NA
Q925I7	Q925I7	PDGFD_MOUSE	Pdgfd	Platelet-derived growth factor D	1923.1	539.477	8750.67	498.078	NA	390.619
O08807	O08807;B1AZS9	PRDX4_MOUSE	Prdx4	Peroxiredoxin-4	63664.3	23425.9	77998.7	12382.3	NA	925.938
P00687	P00687	AMY1_MOUSE	Amy1	Alpha-amylase 1	5574.33	1298.07	6564.34	549.277	NA	NA
Q8C079	Q8C079	STRP1_MOUSE	Strip1	Striatin-interacting protein 1	1183.57	NA	NA	150.747	NA	NA
Q80U72;Q80VQ1	Q80U72;Q80VQ1	LRRC1_MOUSE;SCRIB_MOUSE	Lrrc1;Scrib	Protein scribble homolog	5337.34	7012.89	5509.18	1078.27	NA	498.56
P55002	P55002;Q99PM0	MFAP2_MOUSE	Mfap2	Microfibrillar-associated protein 2	4856.04	2977.12	3680.14	513.965	NA	NA
Q3U308	Q3U308;D3Z2M0;G3UXB4	CTU2_MOUSE	Ctu2	Cytoplasmic tRNA 2-thiolation protein 2	664.32	424.208	346.74	64.9731	NA	NA
Q8BHJ6	Q8BHJ6	SERC5_MOUSE	Serinc5	Serine incorporator 5	12980.3	9810.12	6601.75	1347.65	NA	NA
Q9EPX2	Q9EPX2;B7ZN28	PPN_MOUSE	Papln	Papilin	12212.2	10517.3	12433	2403.81	831.283	NA
E9Q8Z5;E9Q903;E9Q906	E9Q8Z5;E9Q903;E9Q906	E9Q8Z5_MOUSE;E9Q903_MOUSE;E9Q906_MOUSE	Ctnnd1	Catenin delta-1	4091.08	3018.1	4228.04	628.62	429.454	NA
Q9D823	Q9D823	RL37_MOUSE	Rpl37	60S ribosomal protein L37	2457.94	NA	4737	503.646	NA	NA
Q9D1C1	Q9D1C1;A2A4Z1	UBE2C_MOUSE	Ube2c	Ubiquitin-conjugating enzyme E2 C	1943.47	NA	NA	273.403	NA	NA
P63101;P68254;Q9CQV8	P63101;Q9CQV8;P68254	1433B_MOUSE;1433T_MOUSE;1433Z_MOUSE	Ywhab;Ywhaq;Ywhaz	14-3-3 protein zeta/delta	56764.8	11416.8	33589.3	4798.16	NA	NA
Q9WVQ5	Q9WVQ5	MTNB_MOUSE	Apip	Methylthioribulose-1-phosphate dehydratase	350.325	295.808	7.58712	45.7447	NA	17.6003
Q8CA71	Q8CA71	SHSA4_MOUSE	Shisa4	Protein shisa-4	17464.7	53523.3	30934.9	6255.13	3870.44	NA
P04104;P50446;Q3TTY5;Q3UV17;Q6IME9;Q6NXH9;Q922U2	P04104;Q8VED5;P11679;Q922U2;Q9DCV7;Q3UV17;P50446;Q3TTY5;Q6IFZ6;Q99M73;Q6IFZ9;Q8BGZ7;P07744;Q6IME9;Q9Z331;Q6NXH9;Q9R0H5;A0A2R8VHP3;Q3UV11;Q6IFZ8;E9Q1Z0	K22E_MOUSE;K22O_MOUSE;K2C1_MOUSE;K2C5_MOUSE;K2C6A_MOUSE;K2C72_MOUSE;K2C73_MOUSE	Krt1;Krt2;Krt5;Krt6a;Krt72;Krt73;Krt76	Keratin, type II cytoskeletal 1	2379.31	54784.8	1325.38	1976.5	4135.17	NA
P08226	P08226;G3UWN5;A0A1B0GX15	APOE_MOUSE	Apoe	Apolipoprotein E	518098	745270	1377480	196574	22288.3	201694
Q9D304	Q9D304;A2AGL8	RN128_MOUSE	Rnf128	E3 ubiquitin-protein ligase RNF128	5217.88	10196.9	9556.19	1328.52	NA	NA
P68372;P99024;Q7TMM9;Q9D6F9;Q9ERD7	Q9D6F9;P99024;Q9ERD7;Q9CWF2;Q7TMM9;P68372	TBB2A_MOUSE;TBB3_MOUSE;TBB4A_MOUSE;TBB4B_MOUSE;TBB5_MOUSE	Tubb2a;Tubb3;Tubb4a;Tubb4b;Tubb5	Tubulin beta-4B chain	11679.3	16507.2	7138.95	1963.23	NA	NA
P08113;P11499	P08113;P11499;E9PX27;D3Z1R1	ENPL_MOUSE;HS90B_MOUSE	Hsp90ab1;Hsp90b1	Endoplasmin	112186	3452.83	76896.4	27066.2	2657.48	3344.44
P06151;P16125	P16125;P06151;P00342;D3YZQ9;A0A1B0GT41;A0A1B0GSR9;A0A1B0GQX5;D3YVR7;D3YZE4;A0A6I8MX27;A0A1B0GSX0;A0A0N4SVV8;D3Z7F0	LDHA_MOUSE;LDHB_MOUSE	Ldha;Ldhb	L-lactate dehydrogenase A chain	121624	23588.3	92466.2	13643.5	NA	NA
Q8R1J9	Q8R1J9;H3BK73	TOR2A_MOUSE	Tor2a	Torsin-2A	3842.36	NA	1162.74	437.401	NA	NA
Q9CYR0	Q9CYR0;Q8R2K3;D3Z3Y3	SSBP_MOUSE	Ssbp1	Single-stranded DNA-binding protein, mitochondrial	1858.54	140.62	162.191	NA	NA	126.06
P05017	P05017;Q4VJB9;E9Q138;Q8CAR0;D3Z7M4;E9PU89	IGF1_MOUSE	Igf1	Insulin-like growth factor I	1359.49	296.238	2219.11	226.669	NA	NA
Q8R366	Q8R366;A0A0R4J117;G3UYZ1	IGSF8_MOUSE	Igsf8	Immunoglobulin superfamily member 8	740126	713844	1690780	466444	27263.6	77181.7
Q9D1B1	Q9D1B1	Q9D1B1_MOUSE	Cst6	Cystatin E/M	413.153	1582.72	2540.22	349.473	NA	208.491
A0A0G2JFP4	Q8K385;A0A0G2JFP4	A0A0G2JFP4_MOUSE	Frrs1	Ferric-chelate reductase 1	3849.51	13255.4	10312.9	1742.04	NA	NA
Q9DB60	Q9DB60;B1AS14	PXL2B_MOUSE	Prxl2b	Prostamide/prostaglandin F synthase	4714.2	3264.04	2758.49	685.033	NA	NA
F8WH10	F8WH10	F8WH10_MOUSE	Vegfa	Vascular endothelial growth factor A	2372.19	NA	4540.88	684.161	NA	NA
P61620	P61620;Q9JLR1;Q9CYJ6;A2ATT9	S61A1_MOUSE	Sec61a1	Protein transport protein Sec61 subunit alpha isoform 1	1821.84	1049.78	1631.39	298.646	NA	NA
Q61469	Q61469	PLPP1_MOUSE	Plpp1	Phospholipid phosphatase 1	2371.49	NA	2845.91	520.647	NA	NA
P35922;Q61584;Q9WVR4	Q9WVR4;P35922;Q61584;Q6AXB7;D3Z6U8;Q6P5B5;E9QNF5;E9QAT0;E9QAS9;A0A0H2UH27;E9QAS8;A0A0G2JEP0	FMR1_MOUSE;FXR1_MOUSE;FXR2_MOUSE	Fmr1;Fxr1;Fxr2	Synaptic functional regulator FMR1	3801.82	20310.1	19332.5	2926.94	NA	NA
Q8CBR6	Q8CBR6	TSK_MOUSE	Tsku	Tsukushin	1845.02	NA	851.44	272.529	NA	NA
Q9JIS8;Q9WVL3	Q9JIS8;Q91V14;Q9WVL3;A0A076FR46;F8WIJ0	S12A4_MOUSE;S12A7_MOUSE	Slc12a4;Slc12a7	Solute carrier family 12 member 4	NA	24251.6	32022.9	5745.96	NA	NA
D3YWD1	D3YWD1;E9PWQ3	D3YWD1_MOUSE	Col6a3	Collagen, type VI, alpha 3 (Fragment)	11410.6	4234.95	1235.25	178.285	NA	2179.76
P68433;P84228	P84228;P02301;P68433;P84244;A0A1W2P768;E0CZ27;F8WI35	H31_MOUSE;H32_MOUSE	H3c1;H3c2	Histone H3.1	315717	76640.1	411765	77887.5	60423.6	33422.2
A0A075B5Q3;A0A0A6YY69	A0A075B5Q3;A0A0A6YY69	A0A075B5Q3_MOUSE;A0A0A6YY69_MOUSE	Ighv2-5	Immunoglobulin heavy variable 2-5	19344.6	18309.9	223852	32843.3	NA	4541.86
E9PZ16	E9PZ16;B1B0C7	E9PZ16_MOUSE	Hspg2	Basement membrane-specific heparan sulfate proteoglycan core protein	471266	266333	446574	190972	15210	48618.4
Q3TH73	Q3TH73	TTYH2_MOUSE	Ttyh2	Protein tweety homolog 2	366853	202408	204037	76081.6	53975.3	36815.2
Q05793	Q05793;E9PZ16;B1B0C7	PGBM_MOUSE	Hspg2	Basement membrane-specific heparan sulfate proteoglycan core protein	581825	215611	632736	166095	51406.9	98216.1
Q9CX13	Q9CX13;A0A0A6YW87	CNIH4_MOUSE	Cnih4	Protein cornichon homolog 4	5075.74	NA	2931.51	911.691	NA	NA
P35441;Q03350;Q05895	P35441;Q03350;Q05895;E9PWF0;Q80YQ1	TSP1_MOUSE;TSP2_MOUSE;TSP3_MOUSE	Thbs1;Thbs2;Thbs3	Thrombospondin-1	4329.05	9982.95	1406.98	576.895	2326.51	772.021
P26231;Q61301	Q61301;P26231;E0CXB9	CTNA1_MOUSE;CTNA2_MOUSE	Ctnna1;Ctnna2	Catenin alpha-1	7375.33	5236.8	3227.37	1239.65	NA	NA
P84099	P84099;A2A547	RL19_MOUSE	Rpl19	60S ribosomal protein L19	99580.2	32419.6	99305.6	30202.2	12464.6	12415.6
Q5XG71	Q5XG71;E9QK83	UTP20_MOUSE	Utp20	Small subunit processome component 20 homolog	689.228	NA	NA	164.836	NA	NA
E9Q0X2	E9Q0X2	E9Q0X2_MOUSE	Apold1	Apolipoprotein L domain-containing 1	8090.42	24622.8	18710.3	3867.87	5632.63	2841.59
Q91XL1	Q91XL1	Q91XL1_MOUSE	Lrg1	Leucine-rich HEV glycoprotein	5353.96	23806.2	13457.4	3416.36	NA	NA
P68372;P99024;Q7TMM9;Q922F4;Q9CWF2;Q9D6F9;Q9ERD7	Q9D6F9;P99024;Q9ERD7;Q9CWF2;Q7TMM9;P68372;Q922F4	TBB2A_MOUSE;TBB2B_MOUSE;TBB3_MOUSE;TBB4A_MOUSE;TBB4B_MOUSE;TBB5_MOUSE;TBB6_MOUSE	Tubb2a;Tubb2b;Tubb3;Tubb4a;Tubb4b;Tubb5;Tubb6	Tubulin beta-4B chain	349013	284827	397763	201746	25353	21193.9
P62311	P62311	LSM3_MOUSE	Lsm3	U6 snRNA-associated Sm-like protein LSm3	623.728	1558.14	749.187	235.951	NA	NA
A0A1B0GR60;Q9CPX4	Q9CPX4;A0A1B0GR60	A0A1B0GR60_MOUSE;Q9CPX4_MOUSE	Ftl1	Ferritin	3304.58	468.6	2803.6	322.284	NA	739.872
P02089	P02089;P02088;A8DUK4	HBB2_MOUSE	Hbb-b2	Hemoglobin subunit beta-2	971432	747404	405246	314320	160733	40570.8
P07147	P07147;A2ADJ6	TYRP1_MOUSE	Tyrp1	5,6-dihydroxyindole-2-carboxylic acid oxidase	1246820	826321	2540990	757595	114415	253699
Q99P58;Q9ERI2	Q9ERI2;Q99P58	RB27A_MOUSE;RB27B_MOUSE	Rab27a;Rab27b	Ras-related protein Rab-27B	7443.83	13063.7	9497.43	2457.73	NA	NA
Q8BH97	Q8BH97;A0A1B0GSK5;A0A1B0GR19;A0A1B0GS22;A0A1B0GR86	RCN3_MOUSE	Rcn3	Reticulocalbin-3	4488.98	9198.88	1275.99	972.018	1533.73	NA
Q91V87	Q91V87	FGRL1_MOUSE	Fgfrl1	Fibroblast growth factor receptor-like 1	1280.61	2700.33	NA	543.883	NA	457.457
Q8R0Z6;Q9R045	Q9R045;Q8R0Z6	ANGL2_MOUSE;ANGL6_MOUSE	Angptl2;Angptl6	Angiopoietin-related protein 6	15271.1	19351.9	16783	4333.49	NA	NA
Q8BGU5	Q8BGU5	CCNY_MOUSE	Ccny	Cyclin-Y	2416.35	352.504	2579.04	455.215	NA	NA
Q00724	Q00724;H7BWY6;A0A494B9T2;A0A494B9P3	RET4_MOUSE	Rbp4	Retinol-binding protein 4	19613	65284.3	52262	13812.7	NA	9865.59
Q3U821	Q3U821	WDR75_MOUSE	Wdr75	WD repeat-containing protein 75	474.087	584.903	NA	137.874	NA	NA
Q5U405	Q5U405;E9QPR6	TMPSD_MOUSE	Tmprss13	Transmembrane protease serine 13	NA	28890.5	42540	8651.1	7240	12140.4
Q501J6;Q61656	Q61656;Q501J6;Q3U741;Q8BTS0;Q3TU25;S4R1I6	DDX17_MOUSE;DDX5_MOUSE	Ddx17;Ddx5	Probable ATP-dependent RNA helicase DDX17	14658.2	3279.74	7524.57	1499.4	2689.08	2491.66
P60334	P60334;A0A3Q4L374;A0A3Q4EH84;A0A3Q4L347	CDO1_MOUSE	Cdo1	Cysteine dioxygenase type 1	17274.3	NA	NA	NA	4627.31	NA
O89013	O89013	OBRG_MOUSE	Leprot	Leptin receptor gene-related protein	886.639	3494.98	243.759	552.221	274.584	NA
Q64314	Q64314	CD34_MOUSE	Cd34	Hematopoietic progenitor cell antigen CD34	5258.58	8111.08	9810.24	2084.22	NA	NA
Q99J83	Q99J83	ATG5_MOUSE	Atg5	Autophagy protein 5	1364.16	1020.89	NA	322.426	NA	NA
P02535;Q61781;Q6IFX2;Q9QWL7;Q9Z2K1	Q61897;Q61765;Q6IFX3;Q61781;A6BLY7;Q497I4;Q62168;Q9QWL7;P08730;P19001;P02535;P05784;Q9Z2K1;Q6IFX2;Q61414;A1L317;B1AQ75;B1AQ77;A2A513;B1ATJ5	K1C10_MOUSE;K1C14_MOUSE;K1C16_MOUSE;K1C17_MOUSE;K1C42_MOUSE	Krt10;Krt14;Krt16;Krt17;Krt42	Keratin, type I cytoskeletal 10	4205.65	437072	132304	71554.9	75990.1	7735.47
A0A2I3BPL1;A0A2I3BPW0;A0A2I3BS20	A0A2I3BPL1;A0A2I3BPW0;A0A2I3BS20	A0A2I3BPL1_MOUSE;A0A2I3BPW0_MOUSE;A0A2I3BS20_MOUSE	Ndrg2	Protein NDRG2 (Fragment)	3510.77	NA	471.046	554.839	NA	537.89
P18761	P18761;B1ARR4	CAH6_MOUSE	Ca6	Carbonic anhydrase 6	2087.16	NA	3288.65	691.991	NA	785.07
P35505	P35505	FAAA_MOUSE	Fah	Fumarylacetoacetase	3961.97	1942.97	NA	NA	248.478	1381.49
Q80ZM5	Q80ZM5	Q80ZM5_MOUSE	H1f10	H1 histone family, member X	1256.48	2804.52	1807.71	NA	721.727	388.255
O35737;Q9Z2X1	O35737;P70333;Q9Z2X1;Q8C2Q7	HNRH1_MOUSE;HNRPF_MOUSE	Hnrnpf;Hnrnph1	Heterogeneous nuclear ribonucleoprotein H	18168.9	8758.75	15842.5	4777.83	NA	3375.04
D3Z689	Q9CRC7;D3Z689	D3Z689_MOUSE	Adamtsl5	ADAMTS-like 5	7940	6325.47	5909.93	1801.06	2046.51	NA
Q8K0E8	Q8K0E8	FIBB_MOUSE	Fgb	Fibrinogen beta chain	643871	425664	1001370	405203	70570.2	122728
Q91VW3	Q91VW3;I7HPY0	SH3L3_MOUSE	Sh3bgrl3	SH3 domain-binding glutamic acid-rich-like protein 3	3815.96	NA	3485.4	1065.29	NA	NA
Q924X6	Q924X6;A0A571BDC7;A0A571BE60;A0A571BE80;B1AXJ4;B1AXJ6;B1AXJ5;A0A571BEF2;F6YZZ8;B1AXJ3;A0A571BEC8	LRP8_MOUSE	Lrp8	Low-density lipoprotein receptor-related protein 8	1620.86	2196.33	3554.42	721.565	NA	NA
Q8BH26	Q8BH26	TM251_MOUSE	Tmem251	Transmembrane protein 251	2158.47	659.786	7639.59	1301.45	NA	767.946
Q8BUR4	Q8BUR4;A0A1B0GSI1	DOCK1_MOUSE	Dock1	Dedicator of cytokinesis protein 1	1870.84	2978.33	NA	1494.49	262.377	403.201
P62137	P62137	PP1A_MOUSE	Ppp1ca	Serine/threonine-protein phosphatase PP1-alpha catalytic subunit	2817.55	NA	8908.97	374.101	NA	3116.88
Q99K41	Q99K41	EMIL1_MOUSE	Emilin1	EMILIN-1	41402.4	25481.1	29550.8	16628.6	2121.74	10135.9
Q61239	Q61239	FNTA_MOUSE	Fnta	Protein farnesyltransferase/geranylgeranyltransferase type-1 subunit alpha	732.045	NA	NA	267.424	NA	171.282
Q62203	Q62203;D3YW09;G3UVU2;D3Z5A6	SF3A2_MOUSE	Sf3a2	Splicing factor 3A subunit 2	517.616	1368.34	308.643	220.885	NA	NA
P47878	P47878	IBP3_MOUSE	Igfbp3	Insulin-like growth factor-binding protein 3	3763.62	8387.52	5083.09	3681.46	232.506	1296.01
P14115	P14115	RL27A_MOUSE	Rpl27a	60S ribosomal protein L27a	129809	77516.6	109950	55312.6	27113.2	14089.6
P02340	P02340;Q80ZA1;A0A158SIS7;I7HIK9	P53_MOUSE	Tp53	Cellular tumor antigen p53	1809.09	NA	2115.69	609.855	NA	587.836
E9Q7T7	E9Q7T7	CHADL_MOUSE	Chadl	Chondroadherin-like protein	1439.28	5631.88	2826.44	NA	1007.03	NA
B7ZMZ7	B7ZMZ7	B7ZMZ7_MOUSE	Dip2c	Dip2c protein	9380.08	3287.76	6492.56	1957.41	NA	NA
O35490	O35490;Q91WS4	BHMT1_MOUSE	Bhmt	Betaine--homocysteine S-methyltransferase 1	108574	30500.8	48354	44611.8	1730.18	11595.3
Q8BGQ6	Q8BGQ6;A2A8T9;Q6PCQ6	EFC14_MOUSE	Efcab14	EF-hand calcium-binding domain-containing protein 14	1370.42	5060.39	4056.24	1081.84	NA	NA
P26041;P26043	P26043;P26041;Q7TSG6;A0A5F8MPB9	MOES_MOUSE;RADI_MOUSE	Msn;Rdx	Moesin	25144.5	30172.8	6403.4	9522.47	1974.69	7645.58
Q8VCB3	Q8VCB3	GYS2_MOUSE	Gys2	Glycogen [starch] synthase, liver	1766.72	1464.32	2306.15	573.258	NA	NA
Q810B6	Q810B6	ANFY1_MOUSE	Ankfy1	Rabankyrin-5	4238.61	32746.1	NA	7411.73	NA	4207.32
Q9D939	Q9D939	ST1C2_MOUSE	Sult1c2	Sulfotransferase 1C2	23606.9	NA	3823.06	4374.71	NA	NA
O09061	O09061;A0A338P7F1	PSB1_MOUSE	Psmb1	Proteasome subunit beta type-1	6785.34	5113.28	41447.9	8097.11	3428.69	5742.78
Q8R0G7	Q8R0G7;A0A0U1RPY3;A0A0U1RNZ2;D3YWU4;D3YTR6;D6REG2;D3YWA9	SPNS1_MOUSE	Spns1	Protein spinster homolog 1	5632.7	6129.57	10675.8	5767.06	359.104	1141.94
Q9JI46	Q9JI46;A0A338P7L3;I1E4X7;H3BLR8	NUDT3_MOUSE	Nudt3	Diphosphoinositol polyphosphate phosphohydrolase 1	1076.7	986.496	519.359	279.91	NA	NA
Q6ZPF4	Q6ZPF4;D3Z7A7	FMNL3_MOUSE	Fmnl3	Formin-like protein 3	2252.4	2544.78	3243.31	293.229	1451.64	NA
Q8VBT0	Q8VBT0;F6V084	TMX1_MOUSE	Tmx1	Thioredoxin-related transmembrane protein 1	4516.51	7340.28	5476.36	1885.89	NA	NA
Q8K4B0	Q8K4B0;F8WHY8;E9PX23	MTA1_MOUSE	Mta1	Metastasis-associated protein MTA1	675.049	NA	NA	310.633	NA	130.604
P60710	P63260;P60710;G3UZ07;G3UYG0;E9Q606;E9Q5F4	ACTB_MOUSE	Actb	Actin, cytoplasmic 1	823490	629348	1114260	354192	15617.3	473120
Q61781;Q9Z2K1	Q61781;Q9Z2K1	K1C14_MOUSE;K1C16_MOUSE	Krt14;Krt16	Keratin, type I cytoskeletal 14	658.98	24961.6	NA	4512.24	6569.31	1584.54
Q9DCT8	Q9DCT8	CRIP2_MOUSE	Crip2	Cysteine-rich protein 2	2971.77	2319.17	4355.94	1060.89	NA	NA
Q8BV57	Q8BV57	SRCRL_MOUSE	Ssc5d	Soluble scavenger receptor cysteine-rich domain-containing protein SSC5D	7036.54	3210.58	9160.7	2372.78	NA	1909.03
P63044	P63044;B0QZN5	VAMP2_MOUSE	Vamp2	Vesicle-associated membrane protein 2	1231.05	575.039	3065.49	538.127	NA	NA
Q9CQF3	Q9CQF3;A0A1D5RM23;A0A1D5RLS2	CPSF5_MOUSE	Nudt21	Cleavage and polyadenylation specificity factor subunit 5	1146.54	3539.42	1286.76	661.473	NA	NA
P01633	P01634;P01633;A0A140T8P2;A0A0G2JGY3;A0A075B5N7;A0A140T8N9;A0A140T8Q3	KV5A1_MOUSE	Igk-V19-17	Ig kappa chain V19-17	14311.4	48351.9	12854.3	9634.43	14353	1154.38
Q9CY34	Q9CY34;A0A087WQR9	UB2FA_MOUSE	Ube2f	NEDD8-conjugating enzyme UBE2F	1636.76	947.409	NA	341.639	NA	523.942
O54962	O54962	BAF_MOUSE	Banf1	Barrier-to-autointegration factor	48469.4	29207.8	55476.8	16086.2	NA	13769.4
Q9D289	Q9D289;A0A1W2P6E6	TPC6B_MOUSE	Trappc6b	Trafficking protein particle complex subunit 6B	1835.12	NA	436.954	755.759	150.278	242.202
Q9Z1T2	Q9Z1T2	TSP4_MOUSE	Thbs4	Thrombospondin-4	45038.1	12957.5	31998.7	16000	NA	4270.51
P08071	P08071;A0A0G2JFM6;A0A0G2JGN1	TRFL_MOUSE	Ltf	Lactotransferrin	92927.6	41970.5	190119	20345.9	NA	52964.7
Q9R0G6	Q9R0G6;A0A1D5RMB8	COMP_MOUSE	Comp	Cartilage oligomeric matrix protein	69251.6	40630.6	45030	30338.7	3801.86	18275
P50518	P50518	VATE1_MOUSE	Atp6v1e1	V-type proton ATPase subunit E 1	10758.3	8985.6	6282.37	4492.08	1528.34	2802.39
Q8R323	Q8R323	RFC3_MOUSE	Rfc3	Replication factor C subunit 3	1287.9	673.148	65.3771	229.122	NA	NA
P05480;P08103;P25911;Q04736	P05480;P08103;P25911;Q04736;F6UND7	HCK_MOUSE;LYN_MOUSE;SRC_MOUSE;YES_MOUSE	Hck;Lyn;Src;Yes1	Neuronal proto-oncogene tyrosine-protein kinase Src	545.82	13551.5	9707.38	4953.91	NA	436.528
Q99JR5	Q99JR5;H3BJ97;H3BKM8	TINAL_MOUSE	Tinagl1	Tubulointerstitial nephritis antigen-like	87606.4	56602.3	79533.5	42949.3	17088.8	16366.6
Q6ZWR6	Q6ZWR6;A0A1L1STC6	SYNE1_MOUSE	Syne1	Nesprin-1	40362.2	50949.7	80371.9	16158.7	11216	31406.3
Q8K4D3	Q8K4D3;Q5F228	S36A1_MOUSE	Slc36a1	Proton-coupled amino acid transporter 1	626.493	9942.93	9049.49	2070.28	3385.45	1273.3
Q8BL86	Q8BL86	MBLC2_MOUSE	Mblac2	Metallo-beta-lactamase domain-containing protein 2	3346.11	5370.13	6830.51	1780.6	NA	NA
A2AM05	A2AM05	CNTLN_MOUSE	Cntln	Centlein	3484.71	NA	NA	1205.45	NA	NA
Q8R060	Q8R060;G3X9Z0;H3BJ52;H3BKZ0	ZWILC_MOUSE	Zwilch	Protein zwilch homolog	521.253	NA	NA	180.538	NA	NA
Q9JLF6	Q9JLF6;A0A0R4J293	TGM1_MOUSE	Tgm1	Protein-glutamine gamma-glutamyltransferase K	NA	1193.39	556.897	244.755	361.781	NA
P28656;Q78ZA7	P28656;Q78ZA7;Q3TF41;Q8BSH9;B7ZNL2;A0A140LJB5	NP1L1_MOUSE;NP1L4_MOUSE	Nap1l1;Nap1l4	Nucleosome assembly protein 1-like 1	64832.5	4170.43	21638.3	16210.3	NA	4797.93
P98154	P98154;Q6P5A9;A0A338P7A8;E9Q548;E9QNU3;A0A0R4J1M6	IDD_MOUSE	Dgcr2	Integral membrane protein DGCR2/IDD	5620.9	8261.75	7117.41	1957.32	NA	3006.2
Q80U38	Q80U38	KHNYN_MOUSE	Khnyn	Protein KHNYN	3612.72	1166.51	1582.12	867.404	NA	638.753
P18760;P45591;Q9R0P5	Q9R0P5;P18760;P45591;F8WGL3;A0A494B9A7	COF1_MOUSE;COF2_MOUSE;DEST_MOUSE	Cfl1;Cfl2;Dstn	Cofilin-1	12719.6	51587.4	166359	26763.3	47756.8	7423.21
O88947;P16294	O88947;P16294;Q3U3V1	FA10_MOUSE;FA9_MOUSE	F10;F9	Coagulation factor X	4724.12	3990.36	5413.94	3674.72	636.565	716.234
Q6VNB8	Q6VNB8;A0A1D5RLV7;G3UYW1	WDFY3_MOUSE	Wdfy3	WD repeat and FYVE domain-containing protein 3	3672.32	1319.25	NA	NA	NA	889.141
Q61206	Q61206;A0A1L1SQV7;A0A1L1SVK0	PA1B2_MOUSE	Pafah1b2	Platelet-activating factor acetylhydrolase IB subunit alpha2	2477.32	NA	1616.03	735.098	NA	NA
Q8BVU0	Q8BVU0;B2RXP1;B7ZWM8;E9QAU9	LRCH3_MOUSE	Lrch3	DISP complex protein LRCH3	1199.68	687.167	440.176	278.723	NA	NA
Q9ESD6	Q9ESD6;A0A1L1SRR1	CKLF7_MOUSE	Cmtm7	CKLF-like MARVEL transmembrane domain-containing protein 7	2445.95	169.11	1287.77	232.813	NA	704.975
P68368;P68373	P68369;P05213;P68373;Q3UX10;P68368;A0A0A0MQA5	TBA1C_MOUSE;TBA4A_MOUSE	Tuba1c;Tuba4a	Tubulin alpha-4A chain	309316	107556	228126	111776	33082.3	89210.9
Q9WVT6	Q9WVT6	CAH14_MOUSE	Ca14	Carbonic anhydrase 14	19891.4	38096.5	80816.4	20702.7	25954.2	3774.61
P29391	P29391;Q9CPX4;A0A1B0GR60	FRIL1_MOUSE	Ftl1	Ferritin light chain 1	71550.3	27709.7	42115.1	21783	10471	19341.1
Q04857	Q04857	CO6A1_MOUSE	Col6a1	Collagen alpha-1(VI) chain	91653	132625	165838	100231	20456.9	22448.4
P10922	P10922	H10_MOUSE	H1-0	Histone H1.0	NA	2674.89	NA	NA	914.884	1049.26
Q00915	Q00915	RET1_MOUSE	Rbp1	Retinol-binding protein 1	2294.06	NA	831.709	688.563	NA	460.234
P31938;Q63932	Q63932;P31938;Q91YS7	MP2K1_MOUSE;MP2K2_MOUSE	Map2k1;Map2k2	Dual specificity mitogen-activated protein kinase kinase 1	3013.69	1087.47	619.321	584.707	NA	NA
Q924Y0	Q924Y0	BODG_MOUSE	Bbox1	Gamma-butyrobetaine dioxygenase	2365.42	870.911	1936.21	647.365	NA	NA
Q9WV92	Q9WV92;A7YY80;A0A5F8MPE1;D0VYV6;A0A3B2WD96;A0A5F8MPR1;A0A286YCY8;A0A286YD94;A0A3B2WBE1;A0A286YDD0	E41L3_MOUSE	Epb41l3	Band 4.1-like protein 3	1011.62	NA	1712.34	512.011	NA	NA
Q9R045	Q9R045	ANGL2_MOUSE	Angptl2	Angiopoietin-related protein 2	108359	160525	237912	90426.1	31633.5	68808.2
Q5SSZ5;Q8CGB6	Q8CGB6;Q5SSZ5;Q9DBT6;A0A5F8MPF2;E9Q0S6;A0A087WQM0;A0A5F8MP98;A0A1D5RM59;A0A087WQ94;A0A2R8VHQ0;A0A087WQS0;A0A087WRU0;A0A6I8MWZ2	TENS3_MOUSE;TNS2_MOUSE	Tns2;Tns3	Tensin-3	3696.87	1675.25	5049.29	1309.13	NA	NA
Q8BHZ0;Q921M7	Q8BHZ0;Q921M7	CYRIA_MOUSE;CYRIB_MOUSE	Cyria;Cyrib	CYFIP-related Rac1 interactor A	4865.43	13216.8	11496.6	4483.89	4635.33	2045.23
Q9JHJ3	Q9JHJ3;H9H9R4;H3BK59	GLMP_MOUSE	Glmp	Glycosylated lysosomal membrane protein	11071.2	21882.9	21932.9	6914.2	NA	NA
P56873	P56873;F7B6D3	ZNRD2_MOUSE	Znrd2	Protein ZNRD2	6585.67	8182.06	5490.09	3985.18	2207.03	1480.86
Q61292	Q61292	LAMB2_MOUSE	Lamb2	Laminin subunit beta-2	41853.8	39961.4	58692.4	26026	10389.2	16847.1
Q3V1L4	Q3V1L4;G3X9J6;A0A494BBI8;E9Q9M1;A0A494BBP6;A0A494B9X3	5NTC_MOUSE	Nt5c2	Cytosolic purine 5'-nucleotidase	2981.1	3128.57	NA	1724.29	NA	593.816
Q8K0G5	Q8K0G5	EIPR1_MOUSE	Eipr1	EARP and GARP complex-interacting protein 1	1159.91	NA	NA	442.037	NA	NA
Q8K337	Q8K337	I5P2_MOUSE	Inpp5b	Type II inositol 1,4,5-trisphosphate 5-phosphatase	569.98	144.925	NA	238.388	NA	34.1857
Q9QXY6;Q9WVK4	Q9WVK4;Q9QXY6	EHD1_MOUSE;EHD3_MOUSE	Ehd1;Ehd3	EH domain-containing protein 3	38556.7	28306	9591.14	4001.6	19235.9	6010.94
Q9D898	Q9D898	ARP5L_MOUSE	Arpc5l	Actin-related protein 2/3 complex subunit 5-like protein	2512.35	419.163	12573.1	1227.32	NA	2745.31
Q62179	Q62179	SEM4B_MOUSE	Sema4b	Semaphorin-4B	1323.22	2250.75	2695.57	865.973	772.999	772.472
P02463	P02463;Q63ZW6;F7CK55	CO4A1_MOUSE	Col4a1	Collagen alpha-1(IV) chain	6755.13	3828.63	14655.5	NA	NA	3254.37
Q8BVU5	Q8BVU5;A2AH27	NUDT9_MOUSE	Nudt9	ADP-ribose pyrophosphatase, mitochondrial	NA	636.53	1554.09	389.878	NA	458.201
P54116	P54116	STOM_MOUSE	Stom	Stomatin	50704	59689.6	52757.4	19138.8	9522.54	34551.6
P68372;P99024;Q922F4;Q9D6F9;Q9ERD7	Q9D6F9;P99024;Q9ERD7;Q9CWF2;Q7TMM9;P68372;Q922F4	TBB3_MOUSE;TBB4A_MOUSE;TBB4B_MOUSE;TBB5_MOUSE;TBB6_MOUSE	Tubb3;Tubb4a;Tubb4b;Tubb5;Tubb6	Tubulin beta-4B chain	6199.83	10069.7	18854.7	7388.05	1722.8	NA
Q8C4Q6	Q8C4Q6	AIDA_MOUSE	Aida	Axin interactor, dorsalization-associated protein	2205.74	NA	NA	647.974	NA	1072.27
Q9ESU7	Q9ESU7	Q9ESU7_MOUSE	Slc1a5	Amino acid transporter	10823	2584.11	7333.29	4373.27	NA	1022.92
Q6A4J8	Q6A4J8;E9PXY8;G3UWR8;F8VPX1	UBP7_MOUSE	Usp7	Ubiquitin carboxyl-terminal hydrolase 7	1054.13	NA	586.939	399.014	NA	244.066
P00329	P00329	ADH1_MOUSE	Adh1	Alcohol dehydrogenase 1	3794.91	2978.67	2577.13	1967.02	476.583	NA
P15864	P15864	H12_MOUSE	H1-2	Histone H1.2	14583.5	12781.2	41564.5	5988.48	7803.1	13228.5
P01898;P06339;P14430	P14430;P01898;P06339;Q4KN81	HA10_MOUSE;HA15_MOUSE;HA18_MOUSE	H2-Q10;H2-Q8;H2-T23	H-2 class I histocompatibility antigen, Q10 alpha chain	608.529	NA	NA	238.826	NA	NA
P58022	P58022	LOXL2_MOUSE	Loxl2	Lysyl oxidase homolog 2	3074.86	1111.08	2247.27	843.924	NA	NA
Q8C863;Q8CFI0	Q8C863;Q8CFI0;A0A494B9L5;E9PXB7;G3X9H8;A0A494BAE4;A0A494B9F0;A0A494BAD8;A0A494BAG2;A0A494BAX0;A0A494BA39;A0A494B953	ITCH_MOUSE;NED4L_MOUSE	Itch;Nedd4l	E3 ubiquitin-protein ligase Itchy	15706.5	29072.9	17703.4	17613.1	1310.87	5698.18
Q4KML4	Q4KML4;A0A1W2P7X0;E9QMV2	ABRAL_MOUSE	Abracl	Costars family protein ABRACL	2032.34	2946.77	3009.83	725.718	NA	1387.64
Q08761	Q08761	PROS_MOUSE	Pros1	Vitamin K-dependent protein S	16975	37157.9	9842.86	10814.4	12966.5	1627.08
A2AAE1	A2AAE1;A0A1D5RMC4	K1109_MOUSE	Kiaa1109	Transmembrane protein KIAA1109	7799.46	8171.58	7116.18	1030.42	NA	5097.1
O35639	O35639	ANXA3_MOUSE	Anxa3	Annexin A3	72225.7	83885.4	64744.9	61094.6	1079.12	25821.7
E9Q368	E9Q368	E9Q368_MOUSE	Tarbp1	TAR RNA-binding protein 1	183.743	1195.9	NA	275.423	NA	NA
P01902	P01902	HA1D_MOUSE	H2-K1	H-2 class I histocompatibility antigen, K-D alpha chain	3056.65	2226.08	2637.1	1200.02	910.859	NA
Q99PU5	Q99PU5	ACBG1_MOUSE	Acsbg1	Long-chain-fatty-acid--CoA ligase ACSBG1	4421.63	7283.44	5551.22	1858.1	3709.94	1346.01
Q9JKK1	Q9JKK1;A0A0A6YXG0	STX6_MOUSE	Stx6	Syntaxin-6	2547.49	1914.67	4001.67	1133.53	NA	NA
Q9CR86	Q9CR86	CHSP1_MOUSE	Carhsp1	Calcium-regulated heat stable protein 1	2377.69	1028.57	232.383	523.558	515.675	429.107
Q9D020	Q9D020	5NT3A_MOUSE	Nt5c3a	Cytosolic 5'-nucleotidase 3A	1257.22	NA	NA	508.774	NA	NA
Q9ESH5	Q9ESH5;Q9CQZ8	WFDC1_MOUSE	Wfdc1	WAP four-disulfide core domain protein 1	561.216	2433.61	235.114	664.931	208.238	NA
Q6WQJ1	Q6WQJ1	DGLA_MOUSE	Dagla	Diacylglycerol lipase-alpha	1932.15	2475.62	2531.95	939.839	NA	NA
A0A0A6YWM8;F8VPL5	B2RUE8;A0A0A6YWR8;A0A0A6YW53;A0A0A6YWM8;B7ZNR9;F8VPL5;A0A0A6YVZ8;E9PVG7	A0A0A6YWM8_MOUSE;F8VPL5_MOUSE	Map4k4	Mitogen-activated protein kinase kinase kinase kinase 4	2569.7	NA	3442.85	735.83	NA	1708.49
P12815	P12815	PDCD6_MOUSE	Pdcd6	Programmed cell death protein 6	119417	37287.8	101115	39658.4	10005.8	55354.4
O55033	O55033;A0A0J9YUK4;A0A0A0MQF0	NCK2_MOUSE	Nck2	Cytoplasmic protein NCK2	2164.1	1635.38	1499.55	532.904	327.709	1302.33
Q8R5F3	Q8R5F3	OARD1_MOUSE	Oard1	ADP-ribose glycohydrolase OARD1	888.738	NA	NA	362.776	NA	NA
Q61824	Q61824;F6YWH6	ADA12_MOUSE	Adam12	Disintegrin and metalloproteinase domain-containing protein 12	4414.37	7818.42	10636.2	4639.11	1761.64	3032.26
O55026	O55026	ENTP2_MOUSE	Entpd2	Ectonucleoside triphosphate diphosphohydrolase 2	6501.21	4067.09	3962.27	2021.38	NA	NA
Q9R0U0	Q9R0U0;Q3TFP0	SRS10_MOUSE	Srsf10	Serine/arginine-rich splicing factor 10	1518.49	870.619	2355.96	661.678	NA	NA
Q07456	Q07456	AMBP_MOUSE	Ambp	Protein AMBP	47969.6	37747.4	136071	66960.7	1718.39	24272
Q64520	Q64520;E9Q7K1	KGUA_MOUSE	Guk1	Guanylate kinase	1231.93	1340.98	1057.22	509.255	NA	NA
P83510	P83510;B9EKN8;B2RQ80;E0CZD7;E0CZF8;E9PUL9;E0CY98;E0CXD6	TNIK_MOUSE	Tnik	Traf2 and NCK-interacting protein kinase	9609.25	5191.32	6870.57	2824.51	NA	3258.49
Q9D6X6	Q9D6X6	PRS23_MOUSE	Prss23	Serine protease 23	9981.05	13098.4	6679.93	2896.84	7080.21	2578.82
A0A571BG59;A0A5F8MPH8;E9Q2T3;O35452	O35452;A0A5F8MPH8;A0A571BG59;E9Q2T3	A0A571BG59_MOUSE;A0A5F8MPH8_MOUSE;E9Q2T3_MOUSE;O35452_MOUSE	Tnxb	Tenascin XB	2198.83	3341.09	3576.21	1288.05	NA	NA
P01942	P01942;P06467;Q91VB8;A7M7S6	HBA_MOUSE	Hba	Hemoglobin subunit alpha	1013420	610923	2666130	1550740	12268.1	257638
Q80XC3	Q80XC3	US6NL_MOUSE	Usp6nl	USP6 N-terminal-like protein	6360.69	6926.33	4078.3	2363.73	1973.6	3050.8
Q9JJU8	Q9JJU8	SH3L1_MOUSE	Sh3bgrl	SH3 domain-binding glutamic acid-rich-like protein	1495.37	3876.51	NA	1204.18	NA	1087.36
Q9Z2K1	Q9Z2K1	K1C16_MOUSE	Krt16	Keratin, type I cytoskeletal 16	2319.07	14640.3	13477.1	5954.64	3318.25	3734.39
P17426;P17427	P17426;P17427	AP2A1_MOUSE;AP2A2_MOUSE	Ap2a1;Ap2a2	AP-2 complex subunit alpha-1	14138.8	12250.4	17285.8	10811	5462.3	2421.98
Q80XU3	Q80XU3;A0A087WRY3	NUCKS_MOUSE	Nucks1	Nuclear ubiquitous casein and cyclin-dependent kinase substrate 1	882.228	2279.35	2119.73	1282.61	553.282	432.767
A0A2R8VHP3	A0A2R8VHP3	A0A2R8VHP3_MOUSE	Gm5478	Predicted pseudogene 5478	5889.33	53872.6	21885.2	22324.7	177.922	12611.1
Q99JB8	Q99JB8	PACN3_MOUSE	Pacsin3	Protein kinase C and casein kinase II substrate protein 3	19553.7	15349.7	20166.3	8198.93	2968.35	12643
Q64302	Q64302;A0A0G2JGU1	T4S1_MOUSE	Tm4sf1	Transmembrane 4 L6 family member 1	21329.7	31233.2	2647.35	14057.6	6836.2	2994.99
P0C673	P0C673;D3Z6S7	IGS11_MOUSE	Igsf11	Immunoglobulin superfamily member 11	3875.09	1425.7	9395.33	NA	NA	2121.27
Q02257	Q02257	PLAK_MOUSE	Jup	Junction plakoglobin	508.861	5132.74	762.841	702.777	1598.34	473.193
E9QKK8	E9QKK8	E9QKK8_MOUSE	Atp11c	Phospholipid-transporting ATPase	2040.86	2975.67	2209.01	1066.1	398.214	1684.6
F6VSK8	F6VSK8	F6VSK8_MOUSE	Itga6	Integrin alpha-6 (Fragment)	16147.4	1423.33	8069.31	5581.6	2822.23	2802.1
Q9D883	Q9D883;G3UW94;A0A494B947	U2AF1_MOUSE	U2af1	Splicing factor U2AF 35 kDa subunit	3253.57	1863.66	2274.38	1077.01	NA	NA
Q9R257	Q9R257;A0A140T8J4	HEBP1_MOUSE	Hebp1	Heme-binding protein 1	6285.65	2726.64	2320.75	2936.53	1263.04	755.068
Q571I4	Q571I4	PRAG1_MOUSE	Prag1	Inactive tyrosine-protein kinase PRAG1	8109.86	NA	NA	3550.61	NA	NA
O08638;Q6URW6;Q8VDD5	Q6URW6;Q8VDD5;O08638;A0A2R8VHF9;A0A338P6K2;K3W4R2;E9QPE7	MYH11_MOUSE;MYH14_MOUSE;MYH9_MOUSE	Myh11;Myh14;Myh9	Myosin-11	16936.4	18629.6	50638.1	24566.3	934.719	12252.3
P11276	P11276;Q3UHL6;B9EHT6;B7ZNJ1;A0A087WR50;A0A087WSN6;A0A087WS56	FINC_MOUSE	Fn1	Fibronectin	873360	832276	2106480	501493	376215	792577
P02468	P02468;F8VQJ3	LAMC1_MOUSE	Lamc1	Laminin subunit gamma-1	51203.7	40592.5	54479.5	36440.6	9086.21	18646.2
Q08879	Q08879	FBLN1_MOUSE	Fbln1	Fibulin-1	186441	220798	169412	145185	60838.2	46979.2
Q8BI22	Q8BI22;F7CIB0	CE128_MOUSE	Cep128	Centrosomal protein of 128 kDa	8458.96	21058.4	22869.2	11711.1	6685.7	4656.85
Q00731	Q00731;F8WH81;E9Q4N8;F8WH10	VEGFA_MOUSE	Vegfa	Vascular endothelial growth factor A	3447.08	3547.82	4203.36	1468.25	2267.13	1211.28
Q9Z247	Q9Z247	FKBP9_MOUSE	Fkbp9	Peptidyl-prolyl cis-trans isomerase FKBP9	2376.81	4227.51	4811.39	1682.07	NA	NA
Q8BHX3	Q8BHX3	BOREA_MOUSE	Cdca8	Borealin	1643.6	4025.31	2337.51	1329.78	NA	1043.31
Q9QUN9	Q9QUN9	DKK3_MOUSE	Dkk3	Dickkopf-related protein 3	2648.17	3366.81	16840.1	4174.89	NA	2616.11
P21855	P21855;Q3UNJ0;Q3UZ35;Q3UB58;A2AIN5	CD72_MOUSE	Cd72	B-cell differentiation antigen CD72	856.496	68.7119	428.984	201.707	NA	NA
Q64337	Q64337;D3YZJ1	SQSTM_MOUSE	Sqstm1	Sequestosome-1	42933.8	26201.4	229476	51001.9	45459.7	37095.4
Q9D125	Q9D125	RT25_MOUSE	Mrps25	28S ribosomal protein S25, mitochondrial	65941	12033.3	238322	58813.9	890.361	82120.7
Q8BJU2	Q8BJU2;A0A0J9YTS4;D3YXN7	TSN9_MOUSE	Tspan9	Tetraspanin-9	170495	85176.7	70377.6	80676.8	12589.9	53413.8
A0A087WSN6;B7ZNJ1;B9EHT6	B9EHT6;B7ZNJ1;A0A087WSN6	A0A087WSN6_MOUSE;B7ZNJ1_MOUSE;B9EHT6_MOUSE	Fn1	Fibronectin	3816.48	22236.6	21713.1	1641.27	5885.14	13986.8
O35474	O35474;Q8C4U8	EDIL3_MOUSE	Edil3	EGF-like repeat and discoidin I-like domain-containing protein 3	154182	149588	169790	80511.9	81222.6	51730.5
Q7TSV4	Q7TSV4	PGM2_MOUSE	Pgm2	Phosphoglucomutase-2	7148.37	3259.77	1886.09	2156.49	NA	1549.56
Q9CR51	Q9CR51	VATG1_MOUSE	Atp6v1g1	V-type proton ATPase subunit G 1	9918.5	1890.13	6446.6	4363.32	NA	1141.57
P68372;P99024;Q7TMM9;Q9CWF2;Q9D6F9	Q9D6F9;P99024;Q9CWF2;Q7TMM9;P68372	TBB2A_MOUSE;TBB2B_MOUSE;TBB4A_MOUSE;TBB4B_MOUSE;TBB5_MOUSE	Tubb2a;Tubb2b;Tubb4a;Tubb4b;Tubb5	Tubulin beta-4B chain	57083.4	22814.9	36635	24211.4	17052.2	11454.3
Q9D1X9	Q9D1X9	TM50B_MOUSE	Tmem50b	Transmembrane protein 50B	5098.88	11103.1	5516.77	5847.85	703.245	NA
Q8BFS6	Q8BFS6	CPPED_MOUSE	Cpped1	Serine/threonine-protein phosphatase CPPED1	2773.34	NA	NA	1255.17	NA	NA
Q8BMA3	Q8BMA3	CNKR3_MOUSE	Cnksr3	Connector enhancer of kinase suppressor of ras 3	2554.75	1144.03	2161.11	884.243	NA	NA
Q9CQ45	Q9CQ45	NENF_MOUSE	Nenf	Neudesin	1813.87	4799.82	4219.1	2391.9	NA	883.956
Q9Z204	Q9Z204;A0A2I3BRM6;A0A2I3BQH3	HNRPC_MOUSE	Hnrnpc	Heterogeneous nuclear ribonucleoproteins C1/C2	2079.41	1054.87	2517.31	1401.08	148.504	1019.26
P34884	P34884	MIF_MOUSE	Mif	Macrophage migration inhibitory factor	26537.8	32111.3	23497.5	15931.5	NA	9001.43
P17809	P17809	GTR1_MOUSE	Slc2a1	Solute carrier family 2, facilitated glucose transporter member 1	97233.9	109682	65886.3	21162	2165.91	100906
A0A0R4J1L2;D3Z7N2;F6ZFU0	A0A0R4J1L2;D3Z7N2;F6ZFU0	A0A0R4J1L2_MOUSE;D3Z7N2_MOUSE;F6ZFU0_MOUSE	Eef1d	Elongation factor 1-delta	540.107	NA	836.942	314.718	NA	NA
Q8K386	Q8K386;Q3TYH2;D3YTZ8;D3YWS1;D3YYX5;D3Z1A7	RAB15_MOUSE	Rab15	Ras-related protein Rab-15	38947.3	66092.7	183683	82578.7	NA	5587.69
P52912;P70318	P70318;P52912;D3Z4H6;Q921W2;Q80ZW7;Q8CII5;A0A0U1RPB0;D3Z3Y4;D6RGU1;G5E8L2;A0A0N4SVR8;A0A0N4SUX1;D3YY02	TIA1_MOUSE;TIAR_MOUSE	Tia1;Tial1	Nucleolysin TIA-1	1170.81	1219.11	19798.5	1372.6	NA	5405.46
Q91V88	Q91V88;D3Z4D3;D3YTX1	NPNT_MOUSE	Npnt	Nephronectin	1756.37	1932.58	3190.07	1589.26	512.488	NA
O88322	O88322;A0A286YCQ5	NID2_MOUSE	Nid2	Nidogen-2	11205.2	15718.1	18138.1	10554.7	5400.54	4776.69
Q9JIE3	Q9JIE3	OTOR_MOUSE	Otor	Otoraplin	425.285	337.683	539.668	200.072	NA	NA
Q9Z0L8	Q9Z0L8	GGH_MOUSE	Ggh	Gamma-glutamyl hydrolase	3498.39	2622.78	2900.37	930.219	NA	1841.76
Q61334	Q61334	BAP29_MOUSE	Bcap29	B-cell receptor-associated protein 29	1536.57	NA	256.053	637.708	NA	188.882
Q9JKP5	Q9JKP5;Q8C181;Q8R003;A0A0A6YVV8;A0A0A6YXE3;A0A0A6YXP3;S4R267;A0A2K6EDM5;G3X9Q0;A0A0A6YWB0	MBNL1_MOUSE	Mbnl1	Muscleblind-like protein 1	2796.96	9426.45	4023.92	3623.68	1570.16	2304.43
Q91VC4	Q91VC4;G3X924	PLVAP_MOUSE	Plvap	Plasmalemma vesicle-associated protein	NA	3963	NA	2001.96	NA	1657.34
A2ASQ1	A2ASQ1;Z4YK85;M0QWP1;Z4YJS5	AGRIN_MOUSE	Agrn	Agrin	34261.2	24950.5	24563.8	16823.5	11493.2	10402.2
A2ADY9	A2ADY9	DDI2_MOUSE	Ddi2	Protein DDI1 homolog 2	2855.55	2523.85	2780.5	1591.26	1036.8	1145.81
P97401	P97401	SFRP3_MOUSE	Frzb	Secreted frizzled-related protein 3	1625.89	12793.6	4654.29	1615.31	4619.04	2634.53
Q8C6B2	Q8C6B2	RTKN_MOUSE	Rtkn	Rhotekin	999.993	426.834	852.777	505.219	NA	203.076
Q8C669	Q8C669	PELI1_MOUSE	Peli1	E3 ubiquitin-protein ligase pellino homolog 1	7506.48	6674.32	6130.39	2819.97	4438.67	2220.19
F8VQJ3	F8VQJ3	F8VQJ3_MOUSE	Lamc1	Laminin subunit gamma-1	17626.9	16682.4	10991.2	10387.1	3632.75	7138.38
Q6IME9	Q6IME9	K2C72_MOUSE	Krt72	Keratin, type II cytoskeletal 72	442.487	1474.23	NA	447.473	NA	448.692
Q9CPT5	Q9CPT5;D3Z7M5	NOP16_MOUSE	Nop16	Nucleolar protein 16	1129.76	NA	451.679	272.893	NA	468.999
Q6PFR5	Q6PFR5;E9QP00;A0A0N4SVC2	TRA2A_MOUSE	Tra2a	Transformer-2 protein homolog alpha	5671.01	716.111	5372.07	3286.85	NA	411.281
Q61398	Q61398;D3YZE3;D3YUE2	PCOC1_MOUSE	Pcolce	Procollagen C-endopeptidase enhancer 1	15865	27660.3	71460	11499.1	12694.8	30062.3
Q9CZY3	Q9CZY3;E9PY39;B7ZBY7	UB2V1_MOUSE	Ube2v1	Ubiquitin-conjugating enzyme E2 variant 1	5365.79	2315.08	5424.74	2063.86	NA	NA
P62301	P62301;Q921R2	RS13_MOUSE	Rps13	40S ribosomal protein S13	42005.9	34717.6	27134.5	14311.9	8504.27	26363.2
A1L3P4;D3Z0Q9	A1L3P4;D3Z0Q9	A1L3P4_MOUSE;D3Z0Q9_MOUSE	Slc9a6	Sodium/hydrogen exchanger	1104.46	NA	NA	523.21	NA	NA
P16627;P17156;P63017	P63017;P16627;Q61696;P17156;P17879;Q504P4;D3Z5E2	HS71L_MOUSE;HSP72_MOUSE;HSP7C_MOUSE	Hspa1l;Hspa2;Hspa8	Heat shock 70 kDa protein 1-like	411898	851104	1789020	734331	280019	433463
Q6NY15	Q6NY15;A0A668KLF4	TSG10_MOUSE	Tsga10	Testis-specific gene 10 protein	34512.1	12301.9	6030.07	18723.2	5858.47	593.213
Q9D0T1	Q9D0T1	NH2L1_MOUSE	Snu13	NHP2-like protein 1	3010.55	1842.47	1293.04	1355.14	808.818	766.622
P84075;Q91X97	P62748;P84075;Q91X97;A0A1Y7VMK3;D3YVA2;D3Z2Z8;A2A7R5;E9PV73	HPCA_MOUSE;NCALD_MOUSE	Hpca;Ncald	Neuron-specific calcium-binding protein hippocalcin	8024.58	4591.1	6786.42	3862.85	3837.94	1557.85
Q9CWZ3	Q9CWZ3;A0A0G2JFX7;A0A0G2JEA9	RBM8A_MOUSE	Rbm8a	RNA-binding protein 8A	1450.7	NA	1963.37	818.464	NA	NA
G5E8Z3	G5E8Z3	G5E8Z3_MOUSE	2310050C09Rik	RIKEN cDNA 2310050C09 gene	NA	2558.03	NA	1228.6	NA	NA
P59999	P59999	ARPC4_MOUSE	Arpc4	Actin-related protein 2/3 complex subunit 4	29478	26697.4	27049.9	4538.35	20648.6	14827.6
B2RQ71	B2RQ71;E9PWR4	B2RQ71_MOUSE	Dip2c	Dip2c protein	5318.6	8378.06	2736.2	2634.37	NA	NA
Q9ERG0	Q9ERG0	LIMA1_MOUSE	Lima1	LIM domain and actin-binding protein 1	4842.83	6818.78	3970.5	3671.05	1562.14	2296.71
Q91VK4	Q91VK4;A0A087WRM2	ITM2C_MOUSE	Itm2c	Integral membrane protein 2C	27185.3	111800	105882	37754.4	43245.9	37056.2
P68372;P99024;Q7TMM9;Q922F4;Q9CWF2;Q9ERD7	P99024;Q9ERD7;Q9CWF2;Q7TMM9;P68372;Q922F4;G3UZR1	TBB2A_MOUSE;TBB2B_MOUSE;TBB3_MOUSE;TBB4B_MOUSE;TBB5_MOUSE;TBB6_MOUSE	Tubb2a;Tubb2b;Tubb3;Tubb4b;Tubb5;Tubb6	Tubulin beta-4B chain	173142	3985.92	152466	109653	1855.64	47611.9
Q9DCT1	Q9DCT1;Q8CEB6	AKCL2_MOUSE	Akr1e2	1,5-anhydro-D-fructose reductase	3194.23	NA	3591.28	1638.85	NA	NA
P83510;P97820;Q9JM52	P83510;Q9JM52;P97820;B2RUE8;A0A0A6YWR8;A0A0A6YW53;B9EKN8;B2RQ80;A0A0A6YWM8;B7ZNR9;E0CZD7;E0CZF8;F7AMS7;F8VPL5;Q5SXG1;E9PUL9;Q5SXG3;E9PVG7;E0CY98;E0CXD6;G3X9G2	M4K4_MOUSE;MINK1_MOUSE;TNIK_MOUSE	Map4k4;Mink1;Tnik	Traf2 and NCK-interacting protein kinase	76640.8	24430.2	44430.8	33894.3	5039.8	31440.6
O70318;Q9WV92;Q9Z2H5	Q9Z2H5;O70318;Q9WV92;Q80UE5;Q8C928;A7YY80;A0A1W2P6I5;E9PV14;Q80UE4;D0VYV6;A2AUK5;A0A3B2WD96;A0A5F8MPR1;A2AUK8;A0A286YDY4;A2AUK7;A0A3B2WBE1;A0A286YD84	E41L1_MOUSE;E41L2_MOUSE;E41L3_MOUSE	Epb41l1;Epb41l2;Epb41l3	Band 4.1-like protein 2	3460.26	448.797	892.127	891.096	NA	658.132
Q8VCC9	Q8VCC9	SPON1_MOUSE	Spon1	Spondin-1	7035.41	9013.06	6064.71	3870.02	5203.92	1644.68
Q9Z0R9	Q9Z0R9	FADS2_MOUSE	Fads2	Acyl-CoA 6-desaturase	1481.44	1820.64	2198.98	889.113	NA	NA
P51410	P51410;A0A0G2JFQ3;A0A0G2JES3;D3YZT0;D3Z629;A0A140T8T4	RL9_MOUSE	Rpl9	60S ribosomal protein L9	47343.3	25563.9	70330.9	23293.4	9917.98	36327.8
Q99KN9	Q99KN9;Q5SUH7;Q5SUH6	EPN4_MOUSE	Clint1	Clathrin interactor 1	592.895	NA	694.577	157.742	NA	467.435
O54732;P53690	P53690;O54732;Q9R0S2;A0A286YED2	MMP14_MOUSE;MMP15_MOUSE	Mmp14;Mmp15	Matrix metalloproteinase-15	5091.87	17023.4	5487.1	1455.94	10067.2	1959.4
D3Z6I8;E9Q7Q3	E9Q7Q3;D3Z6I8;D3Z2H9	D3Z6I8_MOUSE;E9Q7Q3_MOUSE	Tpm3	Tropomyosin alpha-3 chain	2274.04	5133.3	8403.92	937.293	NA	4215.22
E9QAG7;F6QJX8;F6S742;Q8C5V4;Q99LD7	Q99LD7;Q8C5V4;F6QJX8;F6S742;E9QAG7	E9QAG7_MOUSE;F6QJX8_MOUSE;F6S742_MOUSE;Q8C5V4_MOUSE;Q99LD7_MOUSE	Mkrn1	RING-type E3 ubiquitin transferase	NA	NA	3670.57	2024.73	NA	1572.24
P68372;Q9D6F9	Q9D6F9;P68372	TBB4A_MOUSE;TBB4B_MOUSE	Tubb4a;Tubb4b	Tubulin beta-4B chain	106461	44328.3	142208	120512	606.963	22642.2
Q8K064	Q8K064;A0A0U1RNY8	F174B_MOUSE	Fam174b	Membrane protein FAM174B	12264.8	9338.26	13819.8	6535.62	5054.79	NA
P62267	P62267	RS23_MOUSE	Rps23	40S ribosomal protein S23	16845.5	44974.3	38896.7	11729.9	25031.8	12776.3
Q64322	Q64322;A2AJ21;A2AJ20;A2AJ23	NPDC1_MOUSE	Npdc1	Neural proliferation differentiation and control protein 1	215.119	2890.28	24695.7	2090.39	10104.6	1557.46
P97820	P97820;B2RUE8;A0A0A6YWR8;A0A0A6YW53;A0A0A6YWM8;B7ZNR9;F8VPL5;E9PVG7	M4K4_MOUSE	Map4k4	Mitogen-activated protein kinase kinase kinase kinase 4	19380.5	19895.9	17872.3	9181.95	5000.49	14110.6
A2AF53	A2AF53;Q3TYW3	T185A_MOUSE	Tmem185a	Transmembrane protein 185A	1018.88	2007.18	NA	1319.24	NA	180.151
Q8CI94;Q9ET01;Q9WUB3	Q8CI94;Q9WUB3;Q9ET01;Q3UEJ6;E9PUM3	PYGB_MOUSE;PYGL_MOUSE;PYGM_MOUSE	Pygb;Pygl;Pygm	Glycogen phosphorylase, brain form	32982.5	17334.8	15335.5	16327.2	11929.5	4395.91
Q61686	Q61686	CBX5_MOUSE	Cbx5	Chromobox protein homolog 5	362.329	840.367	NA	299.273	NA	NA
Q9Z1F9	Q9Z1F9	SAE2_MOUSE	Uba2	SUMO-activating enzyme subunit 2	950.012	NA	650.428	399.25	NA	NA
Q62093	Q62093	SRSF2_MOUSE	Srsf2	Serine/arginine-rich splicing factor 2	21264.5	11356.8	23017.7	15242.8	1329.61	11189.1
Q711T7	Q711T7;G5E8V4	NADE_MOUSE	Nadsyn1	Glutamine-dependent NAD(+) synthetase	2098.8	1090.99	NA	1557.99	393.668	435.957
Q8C7K6	Q8C7K6	PCYXL_MOUSE	Pcyox1l	Prenylcysteine oxidase-like	5580.45	4638.83	3509.05	1405.82	NA	3183.27
P25118	P25118	TNR1A_MOUSE	Tnfrsf1a	Tumor necrosis factor receptor superfamily member 1A	4153.94	7142.79	7939.19	4190.9	634.092	4822.27
Q8K2Y3	Q8K2Y3	EVA1B_MOUSE	Eva1b	Protein eva-1 homolog B	40325.5	31259.1	23608.8	20185.7	9335.02	18240.4
Q9ES30	Q9ES30;D3YZ61	C1QT3_MOUSE	C1qtnf3	Complement C1q tumor necrosis factor-related protein 3	71314.5	28426.8	51520.2	32672.4	21265.2	21965.4
Q2PZL6	Q2PZL6	FAT4_MOUSE	Fat4	Protocadherin Fat 4	5068.11	4616.78	1651.4	1793.63	NA	2002.28
Q80ZI6	Q80ZI6	LRSM1_MOUSE	Lrsam1	E3 ubiquitin-protein ligase LRSAM1	989.479	2139.64	518.527	914.186	NA	308.635
P59326;Q91YT7	P59326;Q91YT7;A2AWN8	YTHD1_MOUSE;YTHD2_MOUSE	Ythdf1;Ythdf2	YTH domain-containing family protein 1	608.518	NA	NA	NA	NA	306.244
Q9DD03	Q9DD03	RAB13_MOUSE	Rab13	Ras-related protein Rab-13	5761.49	2932.76	8695.28	2198.49	762.412	5808.65
Q3U0V1;Q91WJ8	Q3U0V1;Q91WJ8;A0A0A6YVV5;A0A0G2JFY5;Q3UUU2;Q3TUE1;Q3TIX6;A0A3B2W465;A0A0G2JGW9;A0A0G2JG00;A2AJ72;A0A3B2WCD8	FUBP1_MOUSE;FUBP2_MOUSE	Fubp1;Khsrp	Far upstream element-binding protein 2	1852.97	4210.78	NA	1262.06	1802.43	NA
Q99LD4	Q99LD4;A0A140LJB7;Q3MIA8;G3UXW9	CSN1_MOUSE	Gps1	COP9 signalosome complex subunit 1	3983.69	2035.87	4468.94	2707.76	611.679	1982.92
Q9DB34	Q9DB34;A0A1B0GR63;A0A1B0GSH4;A0A1B0GT75	CHM2A_MOUSE	Chmp2a	Charged multivesicular body protein 2a	54297	66809.6	72527.8	36234.9	19721.4	41954.8
Q9D8B3	Q9D8B3	CHM4B_MOUSE	Chmp4b	Charged multivesicular body protein 4b	190075	139656	328604	126425	11947.9	195214
P08556	P08556;Q9D091;A0A0G2JE25;A0A0G2JGP4	RASN_MOUSE	Nras	GTPase NRas	17990.6	28939.3	27574.9	7358.33	NA	17813.9
Q60972	Q60972	RBBP4_MOUSE	Rbbp4	Histone-binding protein RBBP4	1837.86	NA	NA	416.522	NA	1448.75
Q9Z175	Q9Z175;E9Q0X7	LOXL3_MOUSE	Loxl3	Lysyl oxidase homolog 3	8419.23	12154.4	10783.8	9045.86	3484.64	3386.82
Q9CWR7	Q9CWR7	STEA1_MOUSE	Steap1	Metalloreductase STEAP1	1176.24	2966.65	1287.92	698.516	NA	1139.48
E9Q0F0	E9Q0F0	E9Q0F0_MOUSE	Krt78	Keratin 78	4553.31	62470.3	26105	15652.2	NA	15876.2
Q3UV17;Q922U2	Q922U2;Q3UV17;P50446;Q8BGZ7;P07744;Q9Z331;Q3UV11	K22O_MOUSE;K2C5_MOUSE	Krt5;Krt76	Keratin, type II cytoskeletal 2 oral	353.581	804.272	2125.85	273.978	NA	838.332
P26928	P26928;E0CXN0	HGFL_MOUSE	Mst1	Hepatocyte growth factor-like protein	8339.51	12773.4	6819.17	4738.84	NA	NA
Q3THS6	Q3THS6;A0A0U1RNT6;A0A0U1RNK6;A0A0U1RQ95	METK2_MOUSE	Mat2a	S-adenosylmethionine synthase isoform type-2	21608.2	3977.67	16352.6	5253.93	NA	9002.15
Q61220	Q61220;Q8BM06;A0A2R8VHV8	NELL2_MOUSE	Nell2	Protein kinase C-binding protein NELL2	3222.26	2542.25	968.342	2084.78	304.547	1061.26
Q9CYG7	Q9CYG7	TOM34_MOUSE	Tomm34	Mitochondrial import receptor subunit TOM34	2073.65	1914.83	1197.16	845.756	NA	930.719
Q922S8	Q922S8;Q3TTL2	KIF2C_MOUSE	Kif2c	Kinesin-like protein KIF2C	3294.31	1411.49	2092.13	1547.42	318.74	1632.13
P48962;P51881	P51881;P48962;Q3V132	ADT1_MOUSE;ADT2_MOUSE	Slc25a4;Slc25a5	ADP/ATP translocase 1	5231.27	6818.21	5636.08	1292.47	NA	4780.61
P35831	P35831	PTN12_MOUSE	Ptpn12	Tyrosine-protein phosphatase non-receptor type 12	2008.71	NA	973.353	1056.99	NA	479.315
P10853;P10854;Q64475;Q64478;Q64524;Q64525;Q6ZWY9;Q8CGP0;Q8CGP1;Q8CGP2;Q9D2U9	Q6ZWY9;Q8CGP0;Q64475;P10853;Q8CGP2;Q9D2U9;Q64478;Q64524;P10854;Q8CGP1;Q64525;P70696;Q8CBB6	H2B1B_MOUSE;H2B1C_MOUSE;H2B1F_MOUSE;H2B1H_MOUSE;H2B1K_MOUSE;H2B1M_MOUSE;H2B1P_MOUSE;H2B2B_MOUSE;H2B2E_MOUSE;H2B3A_MOUSE;H2B3B_MOUSE	H2bc12;H2bc14;H2bc21;H2bc3;H2bc4;H2bc7;H2bc9;H2bu1;Hist1h2bp;Hist2h2bb;Hist3h2ba	Histone H2B type 1-F/J/L	222899	294557	1016170	238149	443240	110472
Q02248	Q02248;F7CRC6	CTNB1_MOUSE	Ctnnb1	Catenin beta-1	12912.1	13552.7	19508.7	11836.7	8284.85	3626.83
P62320	P62320	SMD3_MOUSE	Snrpd3	Small nuclear ribonucleoprotein Sm D3	4123.64	10930.8	11333.3	3477.66	8077.54	2094.05
Q6IFX2	Q6IFX2	K1C42_MOUSE	Krt42	Keratin, type I cytoskeletal 42	3020.74	55329.8	10819.7	15906	6061.49	13887.9
P62754	P62754	RS6_MOUSE	Rps6	40S ribosomal protein S6	174482	47024.3	162944	96066.5	6370.09	97786.7
Q80ZA4	Q80ZA4;F8WH29;E9PUU8	PKHL1_MOUSE	Pkhd1l1	Fibrocystin-L	2878.18	2143.13	1520.45	1717.73	437.85	1252.36
Q8BT60	Q8BT60	CPNE3_MOUSE	Cpne3	Copine-3	9870.68	10228.6	6902.18	7416.25	2112.09	4552.98
P26040;P26043	P26043;P26040	EZRI_MOUSE;RADI_MOUSE	Ezr;Rdx	Ezrin	8164.54	10217.4	8988.46	7554.95	525.318	6219.12
Q5SYH2	Q5SYH2	TM199_MOUSE	Tmem199	Transmembrane protein 199	275.209	1843.18	1027.64	118.192	751.637	774.19
Q61703	Q61703;Q3UEG7;G3X977	ITIH2_MOUSE	Itih2	Inter-alpha-trypsin inhibitor heavy chain H2	311763	426044	463919	264968	205662	157554
Q61390	Q61390;B1AT05	TCPW_MOUSE	Cct6b	T-complex protein 1 subunit zeta-2	523.947	351.77	806.584	199.116	NA	387.924
Q8K274	Q8K274	KT3K_MOUSE	Fn3krp	Ketosamine-3-kinase	6785.7	NA	5218.11	5480.36	NA	806.025
Q80UJ7	Q80UJ7	RB3GP_MOUSE	Rab3gap1	Rab3 GTPase-activating protein catalytic subunit	944.128	NA	723.8	578.608	NA	295.079
C0HKE1;C0HKE2;C0HKE3;C0HKE4;C0HKE5;C0HKE6;C0HKE7;C0HKE8;C0HKE9;Q64523;Q6GSS7;Q8BFU2;Q8CGP5;Q8CGP6;Q8CGP7;Q8R1M2	Q6GSS7;Q8BFU2;C0HKE8;C0HKE3;Q64523;C0HKE9;C0HKE4;C0HKE1;Q8R1M2;Q8CGP6;C0HKE7;C0HKE2;C0HKE6;Q8CGP5;C0HKE5;Q8CGP7;Q8CGP4;A0A0N4SV66	H2A1B_MOUSE;H2A1C_MOUSE;H2A1D_MOUSE;H2A1E_MOUSE;H2A1F_MOUSE;H2A1G_MOUSE;H2A1H_MOUSE;H2A1I_MOUSE;H2A1K_MOUSE;H2A1N_MOUSE;H2A1O_MOUSE;H2A1P_MOUSE;H2A2A_MOUSE;H2A2C_MOUSE;H2A3_MOUSE;H2AJ_MOUSE	H2ac11;H2ac12;H2ac13;H2ac15;H2ac20;H2ac4;H2ac6;H2ac7;H2ac8;H2aj;H2aw;Hist1h2af;Hist1h2an;Hist1h2ao;Hist1h2ap;Hist2h2aa1	Histone H2A type 1-B	34451.6	68592.6	105500	33208.9	34281.6	41796
P97494	P97494	GSH1_MOUSE	Gclc	Glutamate--cysteine ligase catalytic subunit	2342.62	2700.51	2592.87	1736.56	1689.26	579.051
P02535	P02535;A2A513	K1C10_MOUSE	Krt10	Keratin, type I cytoskeletal 10	23572.3	226129	74659.1	81393.4	19814.8	69058.5
Q8BGR6	Q8BGR6;B7ZN40	ARL15_MOUSE	Arl15	ADP-ribosylation factor-like protein 15	3682.15	10727.5	8455.25	3065.43	5377.68	3561.95
Q9DAS9	Q9DAS9;A0A0N4SW28;A0A0N4SVT3	GBG12_MOUSE	Gng12	Guanine nucleotide-binding protein G(I)/G(S)/G(O) subunit gamma-12	122816	185444	171421	94633.8	31059.4	126837
P43274	P43274	H14_MOUSE	H1-4	Histone H1.4	14282.5	11894.6	40466.4	3298.14	11457.7	20414
P56485	P56485	ACKR3_MOUSE	Ackr3	Atypical chemokine receptor 3	1261.61	4246.87	4742.49	2763.32	1285.69	1364.94
P00405	P00405	COX2_MOUSE	Mtco2	Cytochrome c oxidase subunit 2	629.41	1625.77	3178.17	960.828	NA	NA
Q9QXV8	Q9QXV8	SPY2_MOUSE	Spry2	Protein sprouty homolog 2	7143.98	3794.93	10144.8	3291.41	NA	4192.96
O08638;Q61879;Q6URW6	Q6URW6;O08638;Q61879;A0A2R8VHF9;Q3UH59;A0A338P6K2;K3W4R2;E9QPE7;Q5SV64;A0A140LI60	MYH10_MOUSE;MYH11_MOUSE;MYH14_MOUSE	Myh10;Myh11;Myh14	Myosin-11	2566.15	5481.21	6171.7	3030.54	3447.45	1114.28
Q9QYH6	Q9QYH6;Q9ER67	MAGD1_MOUSE	Maged1	Melanoma-associated antigen D1	3187.71	NA	NA	2100.83	NA	1306.18
P61226	P61226	RAP2B_MOUSE	Rap2b	Ras-related protein Rap-2b	78165.7	101910	109565	65266	6564.49	83146.6
Q9D4H8	Q9D4H8;E0CYT5	CUL2_MOUSE	Cul2	Cullin-2	2270.67	2417.63	NA	1255.15	NA	NA
Q3UMC0;Q9D3R6	Q3UMC0;Q9D3R6;D6RGM7;A0A0A0MQ80;D3Z0U5;A0A0G2JFY0;D3Z4J2	AFG2H_MOUSE;KATL2_MOUSE	Katnal2;Spata5	ATPase family protein 2 homolog	1795.21	13990.6	33774	11725.9	10201.8	4654.6
Q3V1G4	Q3V1G4	OLM2B_MOUSE	Olfml2b	Olfactomedin-like protein 2B	NA	1029.72	NA	552.568	NA	NA
P61255	P61255;B1ARA3;B1ARA5	RL26_MOUSE	Rpl26	60S ribosomal protein L26	33350.4	14168.1	27717.3	17555.6	3693.45	19144.5
P98083	P98083;D3Z5U6;D3Z2I8;D3YXZ9	SHC1_MOUSE	Shc1	SHC-transforming protein 1	4560.36	3215.48	5345.66	3986.69	288.777	2775.5
P99024;Q7TMM9;Q9CWF2;Q9ERD7	P99024;Q9ERD7;Q9CWF2;Q7TMM9;A0A1D5RM76	TBB2A_MOUSE;TBB2B_MOUSE;TBB3_MOUSE;TBB5_MOUSE	Tubb2a;Tubb2b;Tubb3;Tubb5	Tubulin beta-5 chain	168448	128781	367338	217861	NA	20889.4
P60867	P60867	RS20_MOUSE	Rps20	40S ribosomal protein S20	25300.6	33378.3	42227.8	15637.6	19380.4	19370.6
Q8VI56	Q8VI56	LRP4_MOUSE	Lrp4	Low-density lipoprotein receptor-related protein 4	1335.64	2391.67	743.219	560.405	NA	1050.08
A2A7Q9	A2A7Q9;A2A7Q8;E9Q2L7;B2KG08	RN19B_MOUSE	Rnf19b	E3 ubiquitin-protein ligase RNF19B	1735.39	4683.25	2422.72	2642.81	515.504	1631.38
Q9R0E1	Q9R0E1	PLOD3_MOUSE	Plod3	Multifunctional procollagen lysine hydroxylase and glycosyltransferase LH3	13295.1	9093.15	9455.01	10737.6	1599.67	4974.6
Q8BRB1	Q8BRB1;Q8C9K6;A0A338P6A7	Q8BRB1_MOUSE	Epha3	Receptor protein-tyrosine kinase	15225.4	5748.98	11090.9	4572.88	NA	7049.97
P01027	P01027;H3BL60	CO3_MOUSE	C3	Complement C3	556090	536899	491392	450327	161280	254081
Q4U4S6	Q4U4S6;A0A5F8MPR4	XIRP2_MOUSE	Xirp2	Xin actin-binding repeat-containing protein 2	9752.93	NA	2600.98	3479.63	NA	3278.18
P61327;Q9CQL1	P61327;Q9CQL1;A0A023T778;G3UZW7	MGN2_MOUSE;MGN_MOUSE	Magoh;Magohb	Protein mago nashi homolog	10816.9	NA	9322.21	5509.11	NA	NA
Q91WT9	Q91WT9;A0A494BAQ7	CBS_MOUSE	Cbs	Cystathionine beta-synthase	3807.71	2547.54	NA	1740.99	NA	NA
Q61245	Q61245;E9PVT8	COBA1_MOUSE	Col11a1	Collagen alpha-1(XI) chain	6218.41	13660.8	12584.2	7957.99	3921.09	NA
P97798	P97798;Q7TQG5;E9QK04	NEO1_MOUSE	Neo1	Neogenin	9713.43	5705.65	11064.9	5529.33	2349.08	6700.66
P0C0S6;Q3THW5	Q3THW5;P0C0S6;Q8R029;Q3UA95	H2AV_MOUSE;H2AZ_MOUSE	H2az1;H2az2	Histone H2A.Z	5975.05	7220.83	4464.59	3277.66	2088.54	4356.65
Q91XL3	Q91XL3;D3YUF9	UXS1_MOUSE	Uxs1	UDP-glucuronic acid decarboxylase 1	16589.3	5993.47	7247.4	7049.15	5532.77	3866.54
P08122	P08122	CO4A2_MOUSE	Col4a2	Collagen alpha-2(IV) chain	868.46	NA	8318.62	NA	2539.38	NA
Q8BNJ2	Q8BNJ2;Q3TNX8;E9PV91	ATS4_MOUSE	Adamts4	A disintegrin and metalloproteinase with thrombospondin motifs 4	14413.5	14933.1	16764.8	5215.3	10484.6	9812.5
P47964	P47964;Q6ZWZ4	RL36_MOUSE	Rpl36	60S ribosomal protein L36	33010	29226.1	12537.3	12255.8	20997.5	8264.25
D3Z7H8	D3Z7H8	CILP2_MOUSE	Cilp2	Cartilage intermediate layer protein 2	3110.79	4250.77	2315.57	2045.61	1537.12	NA
Q810U5	Q810U5;A0A668KL36;F6UK66	CCD50_MOUSE	Ccdc50	Coiled-coil domain-containing protein 50	51450.2	31971.7	80373.4	47593.9	12044.1	31440.4
Q8R464	Q8R464	CADM4_MOUSE	Cadm4	Cell adhesion molecule 4	4395.93	5555.93	14665.1	5735.6	1932.76	6035.63
Q5SF07;Q9CPN8	Q5SF07;Q9CPN8;A6X8Z3	IF2B2_MOUSE;IF2B3_MOUSE	Igf2bp2;Igf2bp3	Insulin-like growth factor 2 mRNA-binding protein 2	4741.45	4360.54	7925.51	4614.02	2591.4	2274.55
P70206;P70208	P70206;P70208	PLXA1_MOUSE;PLXA3_MOUSE	Plxna1;Plxna3	Plexin-A1	6663.62	20949.3	33248.7	19135.2	NA	3461.74
P17156;P63017	P63017;P17156;Q504P4	HSP72_MOUSE;HSP7C_MOUSE	Hspa2;Hspa8	Heat shock-related 70 kDa protein 2	977720	1045260	1671390	1175930	54682.3	826930
Q9R1S8	Q9R1S8;F2Z3X0	CAN7_MOUSE	Capn7	Calpain-7	3887.31	3642.92	2532.92	1857.7	NA	1882.49
Q3UMB9	Q3UMB9	WASC4_MOUSE	Washc4	WASH complex subunit 4	988.036	NA	2148.08	848.095	NA	904.448
Q9R190	Q9R190	MTA2_MOUSE	Mta2	Metastasis-associated protein MTA2	3597.75	3206.97	2641.6	3132.65	NA	393.201
Q91YN5	Q91YN5;Q3UHZ7;A0A0R4J085;A0A0R4J1F6	UAP1_MOUSE	Uap1	UDP-N-acetylhexosamine pyrophosphorylase	4811.87	2858.98	2201.04	3409.95	840.646	1278.69
O35295	O35295	PURB_MOUSE	Purb	Transcriptional activator protein Pur-beta	2162.28	5763.22	3002.77	2344.14	1739.64	NA
O89020	O89020	AFAM_MOUSE	Afm	Afamin	19728.8	80291	41855.1	28648.9	25279.4	25609.3
Q61781;Q6IFX2	Q61781;Q6IFX2	K1C14_MOUSE;K1C42_MOUSE	Krt14;Krt42	Keratin, type I cytoskeletal 14	906.385	NA	10958.9	1922.03	NA	4737.81
P50294;P50295;P50296	P50295;P50296;P50294;A0A1D5RLG2	ARY1_MOUSE;ARY2_MOUSE;ARY3_MOUSE	Nat1;Nat2;Nat3	Arylamine N-acetyltransferase 1	7216.26	7276.63	7113.41	4615.85	3481.18	NA
P55264	P55264	ADK_MOUSE	Adk	Adenosine kinase	31886.5	15690.8	14998.2	25262.8	1228.13	8725.23
Q5SUR0	Q5SUR0	PUR4_MOUSE	Pfas	Phosphoribosylformylglycinamidine synthase	10176.6	3148.73	4420.01	4127.16	3092.97	2778.02
Q91XX7;Q91Y03	Q6PB90;Q91XZ4;Q91V48;Q91XX4;Q91XX8;Q52KQ3;Q91Y00;Q91Y06;Q91XZ6;Q91XZ8;Q91Y03;Q91VD8;Q91XZ5;Q8CDY9;Q91Y01;Q91XX7;Q91XX3;Q91Y04;E9Q5G2	Q91XX7_MOUSE;Q91Y03_MOUSE	Pcdhb16;Pcdhgb2	Protocadherin gamma B2	NA	7124.8	6660.35	2583.54	7594.88	1475.27
P15261	P15261	INGR1_MOUSE	Ifngr1	Interferon gamma receptor 1	4764.28	18546.8	11542.9	5948.9	4614.04	9226.81
Q6ZWX6	Q6ZWX6	IF2A_MOUSE	Eif2s1	Eukaryotic translation initiation factor 2 subunit 1	7779.74	6703.13	7376.63	5321.19	3236.16	3858.7
P02535;Q61781;Q9Z2K1	Q61781;P02535;Q8VCW2;Q9Z320;Q9Z2K1;Q61414;B1AQ77;A2A513	K1C10_MOUSE;K1C14_MOUSE;K1C16_MOUSE	Krt10;Krt14;Krt16	Keratin, type I cytoskeletal 10	14173.6	57495.6	26973.2	31358.8	NA	6084.57
Q9CR30	Q9CR30;D3YTZ7	JOS2_MOUSE	Josd2	Josephin-2	2972.04	4426.67	3899.32	2085.74	2070.61	2282.68
O35127	O35127	C10_MOUSE	Grcc10	Protein C10	1479.47	2901.82	2272.61	1653.47	251.025	1894.67
Q8K221	Q8K221;A0A1B0GS63;A0A1B0GSM3	ARFP2_MOUSE	Arfip2	Arfaptin-2	1672	827.081	878.983	642.992	NA	NA
F8VPN4	A0A0G2JGI9;F8VPN4;F6XXE6	F8VPN4_MOUSE	Agl	4-alpha-glucanotransferase	13306.8	6881.86	6163.16	9452.84	2536.72	3091.37
P62242	P62242	RS8_MOUSE	Rps8	40S ribosomal protein S8	194354	121547	225988	143571	9861.71	156734
Q8BJU0	Q8BJU0;A0A1W2P6P1	SGTA_MOUSE	Sgta	Small glutamine-rich tetratricopeptide repeat-containing protein alpha	6306.54	7299.74	7973.28	5324	2573.45	4456.07
Q8BNE1	Q8BNE1	TCAF1_MOUSE	Tcaf1	TRPM8 channel-associated factor 1	3034.45	1293.36	1017.61	1765.79	274.446	NA
P62983	P62983	RS27A_MOUSE	Rps27a	Ubiquitin-40S ribosomal protein S27a	481339	344238	322579	317210	69281.1	271310
P35278	P35278;Q8C266	RAB5C_MOUSE	Rab5c	Ras-related protein Rab-5C	25845.6	63790.4	69000.8	40032.5	27465.6	23392.8
Q9DC37	Q9DC37	MFSD1_MOUSE	Mfsd1	Major facilitator superfamily domain-containing protein 1	10246.7	10135.7	5680.05	4983.79	NA	NA
E9Q735	E9Q735;E9Q442;Q8VDS1;A0A1L1SUX2;G3X9Y5;A0A1L1SV76;A0A1L1SRI7	UBE4A_MOUSE	Ube4a	Ubiquitin conjugation factor E4 A	832.711	NA	NA	875.691	NA	80.9269
P62313	P62313	LSM6_MOUSE	Lsm6	U6 snRNA-associated Sm-like protein LSm6	NA	3759.23	1677.15	1417.9	1485.15	1787.24
Q8CIH5	Q8CIH5	PLCG2_MOUSE	Plcg2	1-phosphatidylinositol 4,5-bisphosphate phosphodiesterase gamma-2	11617.2	3419.82	2612.28	4689.38	3310.64	2168.57
Q9QYY8	Q9QYY8;A0A3B2WC92;A0A286YE25	SPAST_MOUSE	Spast	Spastin	2705.67	3788.01	2056.91	1673.39	1699.61	1555.43
P70700	P70700;A2AP84	RPA2_MOUSE	Polr1b	DNA-directed RNA polymerase I subunit RPA2	1921.63	NA	652.903	742.161	NA	NA
Q9R1Z8	Q9R1Z8;A0A2I3BS41;Q8K0M3	VINEX_MOUSE	Sorbs3	Vinexin	897.274	1132.07	2594.49	888.939	NA	NA
P62900	P62900;A0A0A6YXL3;A0A0A6YX26	RL31_MOUSE	Rpl31	60S ribosomal protein L31	19282.8	34774.8	33652.2	10119.8	33928.3	6543.27
Q9EPL2	Q9EPL2	CSTN1_MOUSE	Clstn1	Calsyntenin-1	2059.53	9325.79	4318.77	1898.88	3898.39	3261.02
F8VPR2	F8VPR2	F8VPR2_MOUSE	Fmnl2	Formin-like protein 2	2001.32	2168.83	2440.85	1486.63	NA	1056.62
Q9DBT5	Q9DBT5;A2AE27	AMPD2_MOUSE	Ampd2	AMP deaminase 2	6895.87	4221.16	2884.26	3668.61	2656.58	1760.94
P18760	P18760;F8WGL3;A0A494B9A7	COF1_MOUSE	Cfl1	Cofilin-1	272268	87795.4	299188	164373	37923.7	178648
O88668	O88668;K4DI63	CREG1_MOUSE	Creg1	Protein CREG1	5298.85	1811.47	3109.15	2252.17	NA	1692.74
Q9ERD7	Q9ERD7	TBB3_MOUSE	Tubb3	Tubulin beta-3 chain	5830.89	5721.13	3551.58	3804.09	1297.61	3644.1
P83882	P83882;A0A2I3BPG9	RL36A_MOUSE	Rpl36a	60S ribosomal protein L36a	29821	26182.1	22041.5	26288	4142.91	14777.9
P63073	P63073;A0A0G2JGT5;A0A0G2JFB4;A0A0G2JH04	IF4E_MOUSE	Eif4e	Eukaryotic translation initiation factor 4E	6280.58	3334.25	3541.56	5013.23	1661.7	955.097
P42225	P42225;Q99K94;Q8C3V4;Q8CFQ1;A0A087WRI1;A0A087WSP5	STAT1_MOUSE	Stat1	Signal transducer and activator of transcription 1	11920.3	10651.4	4588.66	11995.1	1473.21	2318.45
Q91WG2	Q91WG2	RABE2_MOUSE	Rabep2	Rab GTPase-binding effector protein 2	799.027	270.87	1701.12	537.606	NA	NA
B0V2N1	B0V2N1	PTPRS_MOUSE	Ptprs	Receptor-type tyrosine-protein phosphatase S	93634.4	127600	190918	87837.8	25543.9	126620
P30412	P30412	PPIC_MOUSE	Ppic	Peptidyl-prolyl cis-trans isomerase C	25087.7	55775.8	88730.1	19043.3	42522.9	37414.9
Q923D2	Q923D2;E9PZC4;E9PZC3	BLVRB_MOUSE	Blvrb	Flavin reductase (NADPH)	28515.8	28927.2	26029.5	32414.8	4464.44	11838.4
Q8CF98	Q8CF98	COL10_MOUSE	Colec10	Collectin-10	18185.3	15373.3	10062.9	16996.2	1977.9	6527.22
Q62523	Q62523;Q7TQE2	ZYX_MOUSE	Zyx	Zyxin	2573.74	2246.28	4484.03	2642.89	1259.34	1548.96
Q8K310	Q8K310;A0A494BAZ7;A0A494B9X1;A0A494BAD4	MATR3_MOUSE	Matr3	Matrin-3	2218.4	705.851	1802.69	1456.48	NA	390.126
Q8BH88	Q8BH88;E9PW09	DEP1B_MOUSE	Depdc1b	DEP domain-containing protein 1B	674.381	NA	NA	NA	NA	395.228
Q8R4V5	Q8R4V5	OIT3_MOUSE	Oit3	Oncoprotein-induced transcript 3 protein	2179.35	2691.51	3472.48	2931.58	1282.38	676.228
Q9JKL1	Q9JKL1	PKR1_MOUSE	Prokr1	Prokineticin receptor 1	8041.88	13511.8	11212.2	10536.5	4545.97	4142.01
P08775	P08775;A0A0R4J0V5	RPB1_MOUSE	Polr2a	DNA-directed RNA polymerase II subunit RPB1	1182.48	NA	803.208	582.741	NA	NA
P68368;P68373;Q9JJZ2	P68369;Q9JJZ2;P05214;P05213;P68373;P68368;A0A0A0MQA5	TBA1C_MOUSE;TBA4A_MOUSE;TBA8_MOUSE	Tuba1c;Tuba4a;Tuba8	Tubulin alpha-4A chain	767816	344457	376011	435574	185858	252600
Q3V4D5	Q3V4D5	Q3V4D5_MOUSE	Naa10	N-alpha-acetyltransferase 10	743.076	NA	NA	608.03	NA	265.954
Q5FWI3	Q5FWI3	CEIP2_MOUSE	Cemip2	Cell surface hyaluronidase	13656.2	18339.9	16115.2	9549.79	8112.85	10645.3
P35922	P35922;Q6AXB7;D3Z6U8;E9QNF5;E9QAT0	FMR1_MOUSE	Fmr1	Synaptic functional regulator FMR1	3105.54	1255.16	1580.13	1190.21	412.193	1894.02
O08747	O08747;E9PVI4	UNC5C_MOUSE	Unc5c	Netrin receptor UNC5C	12561.9	15915.7	20013.5	10786.7	6942	10858.5
Q501J6;Q61656;Q62167	Q62095;Q61656;P16381;Q62167;Q501J6;Q3U741;Q8BTS0;Q3TU25;S4R1I6	DDX17_MOUSE;DDX3X_MOUSE;DDX5_MOUSE	Ddx17;Ddx3x;Ddx5	Probable ATP-dependent RNA helicase DDX17	11825.5	10705.5	7541.26	8934.4	2897.37	NA
Q61001	Q61001	LAMA5_MOUSE	Lama5	Laminin subunit alpha-5	9501.93	4113.08	5952.33	6206.33	3194.86	2154.84
P12960	P12960	CNTN1_MOUSE	Cntn1	Contactin-1	4350.54	11467.8	6162.8	4425.29	5654.92	2910.27
Q8CFI0	Q8CFI0;A0A286YCR1;A0A494B9F0;A0A494BAG2;A0A494BAX0;A0A494BA39;A0A494B953	NED4L_MOUSE	Nedd4l	E3 ubiquitin-protein ligase NEDD4-like	26902.6	28319.7	20277.4	15291.1	13641.7	15729.2
Q9WTR5	Q9WTR5	CAD13_MOUSE	Cdh13	Cadherin-13	3538.15	2740.75	5264.33	2169.14	NA	2395.95
Q08943	Q08943;A2AW05	SSRP1_MOUSE	Ssrp1	FACT complex subunit SSRP1	4611.84	1898.75	3854.1	2869.96	NA	1233.19
Q64516;Q9WU65	Q64516;Q9WU65;B1ASZ3	GLPK2_MOUSE;GLPK_MOUSE	Gk;Gk2	Glycerol kinase	NA	NA	31629	18792.9	NA	NA
Q6P8M1	Q6P8M1;A0A0R4J1E8;A0A571BEN9	TATD1_MOUSE	Tatdn1	Putative deoxyribonuclease TATDN1	4323.37	1557.18	1965.63	1905.47	1254.99	1512.38
Q64524;Q8CGP0;Q9D2U9	Q8CGP0;Q9D2U9;Q64524	H2B2E_MOUSE;H2B3A_MOUSE;H2B3B_MOUSE	H2bc21;H2bu1;Hist3h2ba	Histone H2B type 2-E	4249.42	2659.96	3530.73	1767.05	2209.64	2255.38
Q8C6K9	Q8C6K9;E9Q6A6	CO6A6_MOUSE	Col6a6	Collagen alpha-6(VI) chain	9541.89	2920	14925.2	9592.02	NA	1315.1
Q9CPN8	Q9CPN8	IF2B3_MOUSE	Igf2bp3	Insulin-like growth factor 2 mRNA-binding protein 3	3049.71	2550.67	2652.13	2080.81	646.158	2207.03
O35375	O35375	NRP2_MOUSE	Nrp2	Neuropilin-2	45517.2	55802.7	56364.2	45146.3	4751.42	44504.1
Q9ET43	Q9ET43	CLD12_MOUSE	Cldn12	Claudin-12	6277.59	40910.3	8497.61	5597.11	23021.1	4728.23
P70340;P97454	P97454;P70340;Q8C3Y6	SMAD1_MOUSE;SMAD5_MOUSE	Smad1;Smad5	Mothers against decapentaplegic homolog 1	4209.03	3151.61	3288.46	958.492	NA	3293.11
Q923U0	Q923U0;Q8BZR6;A6PWP3	TM1L1_MOUSE	Tom1l1	TOM1-like protein 1	23852.5	19005.5	10723.2	12157	12019.1	7925.35
Q91XX7	Q91XX7	Q91XX7_MOUSE	Pcdhgb2	Protocadherin gamma B2	2935.04	5762.6	6255.25	2286.61	2623.12	4062.66
Q6KAU4	Q6KAU4	MB12B_MOUSE	Mvb12b	Multivesicular body subunit 12B	59271.7	52405.2	50056.8	42327.7	10333	44438.7
O35226	O35226	PSMD4_MOUSE	Psmd4	26S proteasome non-ATPase regulatory subunit 4	3612.53	5193.18	3903.48	3903.22	431.104	3296.9
P10493	P10493	NID1_MOUSE	Nid1	Nidogen-1	28421.5	22424.5	23871.6	22739.6	11460.2	10714
Q6P2L7	Q6P2L7;E9PZJ6	GOLM2_MOUSE	Golm2	Protein GOLM2	1518.42	1294.55	1438.93	891.512	874.513	790.511
Q60943	Q60943	I17RA_MOUSE	Il17ra	Interleukin-17 receptor A	4913.11	3762.46	7259.99	4636.06	1304.8	3640.85
Q9WVL0	Q9WVL0;A0A1Y7VJZ2	MAAI_MOUSE	Gstz1	Maleylacetoacetate isomerase	12884.6	3119.42	NA	9164.21	1529.26	3742.28
Q06194	Q06194;B2RRC9	FA8_MOUSE	F8	Coagulation factor VIII	1373.91	2716.83	2144.98	1036.66	NA	1468.21
P49769;Q61144	Q61144;P49769;Q3U4P5;A0A0R4J1F2	PSN1_MOUSE;PSN2_MOUSE	Psen1;Psen2	Presenilin-1	20587.8	31308.7	17948.5	29131.9	774.426	12212.7
A0A087WS16;J3QQ16	J3QQ16;E9PWQ3;A0A087WS16	A0A087WS16_MOUSE;J3QQ16_MOUSE	Col6a3	Collagen, type VI, alpha 3	82709.5	47334.4	68937.4	74350.2	19300.9	26389.5
O70325	O70325;S4R1E5	GPX4_MOUSE	Gpx4	Phospholipid hydroperoxide glutathione peroxidase	2614.13	1516.83	1877.73	2012.77	NA	404.007
Q99P72	Q99P72	RTN4_MOUSE	Rtn4	Reticulon-4	12300	10176.3	5356.63	7738.86	1409.69	7657.5
P10833	P10833	RRAS_MOUSE	Rras	Ras-related protein R-Ras	7238.32	11247.7	8913.31	6446.21	NA	4594.73
P50446	P50446;Q8BGZ7;Q9Z331;A0A2R8VHP3;Q3UV11;Q6IFZ8	K2C6A_MOUSE	Krt6a	Keratin, type II cytoskeletal 6A	7065.36	26028.2	9357.89	12085.5	10643.7	2952.99
Q8VEM1	Q8VEM1;A0A571BES6;Q5SVR5	GOLI_MOUSE	Rnf130	E3 ubiquitin-protein ligase RNF130	39119.8	39132.3	70673.2	52890.8	8052.21	29195.4
O55106	O55106;F8WH41	STRN_MOUSE	Strn	Striatin	1749.67	1466.46	1280.7	1408.82	NA	408.547
Q8BU31	Q8BU31	RAP2C_MOUSE	Rap2c	Ras-related protein Rap-2c	5296.35	10296.3	4549.66	5932.35	1802.31	4478.66
Q9Z1P5	Q9Z1P5	CD320_MOUSE	Cd320	CD320 antigen	12664.8	12000.8	12889.6	7601.47	NA	NA
P10107	P10107;A0A494BBD8	ANXA1_MOUSE	Anxa1	Annexin A1	107182	75775.4	169120	77366.8	29728.4	106712
Q80ZJ1	Q80ZJ1	RAP2A_MOUSE	Rap2a	Ras-related protein Rap-2a	6470.83	5646.43	12223.3	6611.28	1064.86	7123.17
P61022	P61022;B0R091	CHP1_MOUSE	Chp1	Calcineurin B homologous protein 1	1266.48	2186.64	435.341	668.107	689.944	1008.04
O54941	O54941	SMCE1_MOUSE	Smarce1	SWI/SNF-related matrix-associated actin-dependent regulator of chromatin subfamily E member 1	1108.84	NA	1449.63	1002.8	NA	556.194
P62305	P62305;E9Q0W8;E9Q4F4	RUXE_MOUSE	Snrpe	Small nuclear ribonucleoprotein E	4297.78	3027.56	6476.52	3685.16	NA	1921.61
Q61937	Q61937;Q9DAY9;Q5SQB0;Q5SQB5	NPM_MOUSE	Npm1	Nucleophosmin	15762.5	2931.04	6914.54	5473.3	2238.66	7893.49
Q9QZF2	Q9QZF2	GPC1_MOUSE	Gpc1	Glypican-1	11775	9141.72	14709.8	9058.52	2151.92	10510.3
Q80X95	Q80X95;Q6NTA4	RRAGA_MOUSE	Rraga	Ras-related GTP-binding protein A	1898.73	846.554	1287.51	820.567	NA	NA
Q9D1Q6	Q9D1Q6	ERP44_MOUSE	Erp44	Endoplasmic reticulum resident protein 44	5543.08	1551.49	6059.76	2679.46	NA	NA
Q9JM93	Q9JM93;D3Z6F1;D3YWC2	AR6P4_MOUSE	Arl6ip4	ADP-ribosylation factor-like protein 6-interacting protein 4	437.713	NA	NA	226.54	NA	309.544
O09114	O09114	PTGDS_MOUSE	Ptgds	Prostaglandin-H2 D-isomerase	5765.63	21385.4	34601.6	7964.93	2961.67	26908.3
Q9R062	Q9R062;K3W4S6;V9GX26	GLYG_MOUSE	Gyg1	Glycogenin-1	2937.93	3703.6	2920.76	2849.12	NA	1058.23
Q9D2G2	Q9D2G2	ODO2_MOUSE	Dlst	Dihydrolipoyllysine-residue succinyltransferase component of 2-oxoglutarate dehydrogenase complex, mitochondrial	NA	NA	2431.29	1490.24	NA	NA
O88543	O88543	CSN3_MOUSE	Cops3	COP9 signalosome complex subunit 3	4662.24	3534.55	4586.62	3377.92	633.907	3824.03
Q8C0D5	Q8C0D5	EFL1_MOUSE	Efl1	Elongation factor-like GTPase 1	1138.95	NA	NA	329.677	NA	1067.52
O89086	O89086;Q8BG13	RBM3_MOUSE	Rbm3	RNA-binding protein 3	22307.3	52521.8	39348.9	33599.6	11568.1	24932.1
O08992	O08992;Q3TMX0;H3BLG5;A2AKJ6;A2AKJ9	SDCB1_MOUSE	Sdcbp	Syntenin-1	680765	619959	1126940	870061	136254	484332
Q62283	Q62283;Q3UHG5	TSN7_MOUSE	Tspan7	Tetraspanin-7	23173.1	16203.6	24970.3	14359.9	1055.59	24107
P15327	P15327;D3Z223	PMGE_MOUSE	Bpgm	Bisphosphoglycerate mutase	23155.1	7880.57	16525.4	20330	6575.99	2333.08
P60335;Q61990	P57722;P60335;Q61990;B2M1R7;Q3TT81;A0A2R8W6U6;A0A2R8VHP9;G3UYM5;A0A2R8W6H3;A0A2R8VI92;A0A2R8VI25	PCBP1_MOUSE;PCBP2_MOUSE	Pcbp1;Pcbp2	Poly(rC)-binding protein 1	73920.1	90205.6	114287	98601.4	12898.8	59768.6
Q9QUP5	Q9QUP5	HPLN1_MOUSE	Hapln1	Hyaluronan and proteoglycan link protein 1	81295.9	104557	78043.7	41072.9	89032.1	32292.1
P63325	P63325;Q3UW83;A0A338P7K4;A0A338P731;A0A3B2W864	RS10_MOUSE	Rps10	40S ribosomal protein S10	7934.55	8314.32	7764.19	4975.96	5133.61	4691.72
P61202	P61202;A2AQE4	CSN2_MOUSE	Cops2	COP9 signalosome complex subunit 2	4819.83	2525.42	3176.13	2959.61	653.325	2875.69
Q6P5F7	Q6P5F7	TTYH3_MOUSE	Ttyh3	Protein tweety homolog 3	61133.1	59173.8	71224.8	45789.1	31269.7	41098.3
Q9JM52	Q9JM52;Q5SXG1;Q5SXG3;G3X9G2	MINK1_MOUSE	Mink1	Misshapen-like kinase 1	9084.92	5572.15	4929.48	4011.62	3773.52	4317.5
Q3UH60	Q3UH60	DIP2B_MOUSE	Dip2b	Disco-interacting protein 2 homolog B	110066	85704	67428.1	58638.8	50754.3	53355.3
P58252	P58252	EF2_MOUSE	Eef2	Elongation factor 2	121241	66075.4	89115.3	82975.2	19338.6	68652.3
P62743	P62743;A0A0U1RPS0	AP2S1_MOUSE	Ap2s1	AP-2 complex subunit sigma	3762.12	1069.95	943.823	1052	NA	1331.16
P60843	P60843	IF4A1_MOUSE	Eif4a1	Eukaryotic initiation factor 4A-I	42407.3	17698.3	28433.2	22291.2	5751.98	26778.7
P62918	P62918	RL8_MOUSE	Rpl8	60S ribosomal protein L8	42999.4	30559.3	45229.3	39636.4	7680.98	26355.5
P47879	P47879;H3BLB7	IBP4_MOUSE	Igfbp4	Insulin-like growth factor-binding protein 4	2331.99	3214.19	6102.34	2044.5	NA	2772.65
Q80ZJ6	Q80ZJ6	ZER1_MOUSE	Zer1	Protein zer-1 homolog	1082.55	691.46	NA	741.479	NA	359.714
P32507	P32507	NECT2_MOUSE	Nectin2	Nectin-2	4406.02	3706.7	4892.86	2766.4	NA	2618.27
P62852	P62852;A0A1L1SQA8	RS25_MOUSE	Rps25	40S ribosomal protein S25	37869.5	70242	83581.9	42524.1	59411.6	17235.8
P62715;P63330;P97470	P63330;P97470;P62715	PP2AA_MOUSE;PP2AB_MOUSE;PP4C_MOUSE	Ppp2ca;Ppp2cb;Ppp4c	Serine/threonine-protein phosphatase 2A catalytic subunit beta isoform	2593.7	1137.14	1751.88	1692.25	NA	580.899
P54751	P54751	SIA4A_MOUSE	St3gal1	CMP-N-acetylneuraminate-beta-galactosamide-alpha-2,3-sialyltransferase 1	2932.97	1275.46	9036.26	1637.39	NA	3856.76
P97298	P97298	PEDF_MOUSE	Serpinf1	Pigment epithelium-derived factor	91304.2	139482	140218	106524	54981.1	69841.7
Q7TNL7	Q7TNL7	Q7TNL7_MOUSE	Dusp9	Dual specificity protein phosphatase	1711.84	562.12	390.427	826.13	NA	281.547
P50446;Q3TTY5;Q3UV17;Q6NXH9;Q922U2	P19246;Q922U2;Q3UV17;P50446;Q3TTY5;Q8BGZ7;P07744;Q9Z331;Q6NXH9;Q3UV11;E9Q1Z0	K22E_MOUSE;K22O_MOUSE;K2C5_MOUSE;K2C6A_MOUSE;K2C73_MOUSE	Krt2;Krt5;Krt6a;Krt73;Krt76	Keratin, type II cytoskeletal 6A	23477.7	88652	106874	79748.4	7746.99	49093
Q8K0Q5	Q8K0Q5	RHG18_MOUSE	Arhgap18	Rho GTPase-activating protein 18	NA	821.939	611.071	887.012	66.3261	388.586
P47941	P47941	CRKL_MOUSE	Crkl	Crk-like protein	8543.11	12003.9	6756.54	9989.63	1683.76	5375.59
Q03173	Q03173;E9QLZ9;E9QKQ9;J3QNM3;A0A0A6YXC8;E9QKR1;A0A0A6YW06	ENAH_MOUSE	Enah	Protein enabled homolog	1941.2	NA	1543.8	1322.1	NA	856.52
Q3THG9	Q3THG9;A2A4P4;A2A4P3	AASD1_MOUSE	Aarsd1	Alanyl-tRNA editing protein Aarsd1	2504.23	NA	1374.07	1922.89	NA	502.406
Q99J77	Q99J77	SIAS_MOUSE	Nans	Sialic acid synthase	11496.6	4828.26	9962.21	10996.4	767.518	4685.5
Q8R4H2	Q8R4H2;F8VQN6	ARHGC_MOUSE	Arhgef12	Rho guanine nucleotide exchange factor 12	1003.38	1450.25	1663.26	858.74	NA	NA
Q9QZW0	Q9QZW0;F6Q8D3;E9QKK8	AT11C_MOUSE	Atp11c	Phospholipid-transporting ATPase 11C	3958.11	4848.35	4800.87	2656.13	3460.09	2422.03
A2AR02	A2AR02;A2AR01	PPIG_MOUSE	Ppig	Peptidyl-prolyl cis-trans isomerase G	959.804	2195.35	2658.58	1216.17	NA	NA
A2AQ07;P68372;P99024;Q7TMM9;Q922F4;Q9CWF2	P99024;Q9CWF2;Q7TMM9;P68372;A2AQ07;Q922F4	TBB1_MOUSE;TBB2A_MOUSE;TBB2B_MOUSE;TBB4B_MOUSE;TBB5_MOUSE;TBB6_MOUSE	Tubb1;Tubb2a;Tubb2b;Tubb4b;Tubb5;Tubb6	Tubulin beta-1 chain	35868.8	1042.46	33681.8	26464.6	NA	3073.99
P32037	P32037	GTR3_MOUSE	Slc2a3	Solute carrier family 2, facilitated glucose transporter member 3	17489.8	29321.7	19353.6	12426	15176.4	13972.2
P04370	P04370;A0A498WGS3	MBP_MOUSE	Mbp	Myelin basic protein	5933.97	3483.08	6015.22	3776.39	2452.24	3472.87
Q920Q4	Q920Q4;G3X8X7	VPS16_MOUSE	Vps16	Vacuolar protein sorting-associated protein 16 homolog	2549.74	3456.86	2056.58	1405.98	2076.91	1590.21
P59222	P59222	SREC2_MOUSE	Scarf2	Scavenger receptor class F member 2	2552.01	7011.87	8127.77	4680.64	2442.39	4017.4
O08710	O08710;A6P7M8;F6XYF6	THYG_MOUSE	Tg	Thyroglobulin	36828.2	21940.4	8416.15	29942.1	3051.26	9338.76
Q3TGG2	Q3TGG2	Q3TGG2_MOUSE	Atxn2l	Ataxin-2-like protein	2207.87	2455.43	2801.69	2278.35	NA	857.399
Q8C1A5	Q8C1A5;A0A0R4IZY0	THOP1_MOUSE	Thop1	Thimet oligopeptidase	1451.48	1228.75	1073.88	788.965	NA	NA
P05202	P05202	AATM_MOUSE	Got2	Aspartate aminotransferase, mitochondrial	67014.5	103756	121667	61510.9	NA	61548.2
Q8BX07	Q8BX07;Q8R3B3	CTDS2_MOUSE	Ctdsp2	Carboxy-terminal domain RNA polymerase II polypeptide A small phosphatase 2	5608.7	16799.5	12258.7	8219.74	7128.16	6574.77
P97429	P97429;S4R1F2;A0A0N4SW89;A0A0N4SV57;D3Z0S1	ANXA4_MOUSE	Anxa4	Annexin A4	32567.9	25168.3	37636.8	29433.5	4337.21	26590
Q3TWW8	Q3TWW8	SRSF6_MOUSE	Srsf6	Serine/arginine-rich splicing factor 6	7689.34	6255.52	11908.5	10102.2	3482.63	2788.14
Q3UMU9	Q3UMU9	HDGR2_MOUSE	Hdgfl2	Hepatoma-derived growth factor-related protein 2	820.626	126.541	234.749	448.064	NA	51.0646
P60710;P62737	P63268;P63260;P62737;P60710;P68134;P68033;F8WGM8;B1ATY1;E9Q1F2	ACTA_MOUSE;ACTB_MOUSE	Acta2;Actb	Actin, cytoplasmic 1	516170	992351	2105170	1163320	718554	407858
Q91Z31	Q91Z31;Q3V328;A0A0G2JGW0	PTBP2_MOUSE	Ptbp2	Polypyrimidine tract-binding protein 2	4468.35	5931.09	5316.47	NA	5307.6	1333.85
B2RXV4	B2RXV4;A0A0A6YWJ7;A0A0A6YXG8	FLVC1_MOUSE	Flvcr1	Feline leukemia virus subgroup C receptor-related protein 1	1978.68	884.471	2192.53	984.678	NA	1152.06
Q8K094	Q8K094	Q8K094_MOUSE	Pvr	Poliovirus receptor	17390.5	17643.2	21670.3	12803.5	4094.39	19094.3
Q9JIG7	Q9JIG7	CCD22_MOUSE	Ccdc22	Coiled-coil domain-containing protein 22	4621.33	1814.09	NA	1285.05	NA	2800.67
P56371;Q91ZR1	Q91ZR1;P56371	RAB4A_MOUSE;RAB4B_MOUSE	Rab4a;Rab4b	Ras-related protein Rab-4A	6454.99	4217.12	7382.2	6873.69	779.078	NA
G3XA59	G3XA59	LRC32_MOUSE	Lrrc32	Transforming growth factor beta activator LRRC32	978.398	720.485	NA	541.327	NA	NA
P68372;Q922F4;Q9D6F9;Q9ERD7	Q9D6F9;Q9ERD7;P68372;Q922F4	TBB3_MOUSE;TBB4A_MOUSE;TBB4B_MOUSE;TBB6_MOUSE	Tubb3;Tubb4a;Tubb4b;Tubb6	Tubulin beta-4B chain	133505	161676	183919	103866	90476	111226
O88572;Q91VN0	O88572;Q91VN0;A0A0R4J0A9;H3BL52	LRP5_MOUSE;LRP6_MOUSE	Lrp5;Lrp6	Low-density lipoprotein receptor-related protein 6	6698.59	6976.51	3800.7	6144.98	NA	1286.85
O88783	O88783	FA5_MOUSE	F5	Coagulation factor V	175047	269565	271756	154251	159855	143201
P84104	P84104	SRSF3_MOUSE	Srsf3	Serine/arginine-rich splicing factor 3	21083.2	17481.2	32221.2	19568.9	14124.9	11495.5
Q64487	Q64487;Q5SPA9;B9EJA3;G3UY75;G3UX60;G3UYU6;G3UWK6;E9PVW8;E9Q7I7	PTPRD_MOUSE	Ptprd	Receptor-type tyrosine-protein phosphatase delta	1710.83	9507.99	7957.47	4734.65	4211.78	3304.64
Q62159	Q62159	RHOC_MOUSE	Rhoc	Rho-related GTP-binding protein RhoC	8118.79	22286.9	19538	8528.84	16280.9	7180.74
Q6PGC1	Q6PGC1	DHX29_MOUSE	Dhx29	ATP-dependent RNA helicase DHX29	1108.93	NA	NA	781.723	NA	639.095
Q8VC88	Q8VC88	GRAN_MOUSE	Gca	Grancalcin	983.675	1644.8	869.621	1422.46	75.4691	NA
Q91VH6	Q91VH6;A0A3B2W7C9	MEMO1_MOUSE	Memo1	Protein MEMO1	3061.68	2586.23	2491.06	1777.47	1586.64	1863.97
Q921W0	Q921W0	CHM1A_MOUSE	Chmp1a	Charged multivesicular body protein 1a	18655.4	51559.3	49716.4	27482.2	32810.1	16783.4
P28654	P28654	PGS2_MOUSE	Dcn	Decorin	16877.9	29775.3	16654.8	17926.9	10492.1	12335.1
P62806	P62806	H4_MOUSE	H4c1	Histone H4	134134	187008	451262	212265	114663	170353
P47911	P47911	RL6_MOUSE	Rpl6	60S ribosomal protein L6	47049.6	30816.8	46802.4	44844.6	11289.4	24148.6
P60060	P60060;G3UWH0	SC61G_MOUSE	Sec61g	Protein transport protein Sec61 subunit gamma	1697.18	1571.82	NA	929.037	NA	1176.94
Q9CX00	Q9CX00	IST1_MOUSE	Ist1	IST1 homolog	88180.6	142364	97825.8	74054.8	87506.5	50377.6
P57780;Q7TPR4	Q7TPR4;P57780;A1BN54;A0A1L1SVJ6;A0A1L1SV25	ACTN1_MOUSE;ACTN4_MOUSE	Actn1;Actn4	Alpha-actinin-4	20216.5	14416	11677.9	11432.5	6331.01	12130.5
O08638;Q61879;Q8VDD5	Q6URW6;Q8VDD5;O08638;Q61879;Q8BXF2;A0A2R8VHF9;Q3UH59;A0A338P6K2;K3W4R2;E9QPE7;Q5SV64	MYH10_MOUSE;MYH11_MOUSE;MYH9_MOUSE	Myh10;Myh11;Myh9	Myosin-11	4862.41	7087.1	7606.24	4364.32	2927.39	5335.21
Q00262	Q00262;Q3TJ55;Q80W45	STX2_MOUSE	Stx2	Syntaxin-2	2151.16	2414.96	1531.49	1902.88	NA	723.569
O88587	O88587;D3Z227	COMT_MOUSE	Comt	Catechol O-methyltransferase	9586.54	3041.09	NA	4079.77	NA	NA
Q8K004	Q8K004	SPAT2_MOUSE	Spata2	Spermatogenesis-associated protein 2	908.257	446.043	1392.62	592.022	NA	NA
Q9CR57	Q9CR57;A0A1L1SUF6	RL14_MOUSE	Rpl14	60S ribosomal protein L14	78153.2	69361	95427.2	76628	42796.7	37830.4
Q9QZB9	Q9QZB9	DCTN5_MOUSE	Dctn5	Dynactin subunit 5	1233.37	2496.84	NA	1032.87	1381.82	NA
Q3TYX3	Q3TYX3	SMYD5_MOUSE	Smyd5	SET and MYND domain-containing protein 5	165.479	308.173	265.725	194.052	89.6024	195.561
P20352	P20352;A0A0R4J088	TF_MOUSE	F3	Tissue factor	13472	3675.89	5433.19	4434.39	1372.98	8834.67
O54819	O54819;Q8BSB7;A2ARA4;A2ARA3;A2ARA0	TFPI1_MOUSE	Tfpi	Tissue factor pathway inhibitor	2723.48	7269.26	7311.56	2531.26	6653.43	2043.03
Q6PDM2	Q6PDM2;H7BX95	SRSF1_MOUSE	Srsf1	Serine/arginine-rich splicing factor 1	27860.3	24417.3	21297.7	26042	2873.73	18832
Q9CYN9	Q9CYN9	RENR_MOUSE	Atp6ap2	Renin receptor	7776.05	6433.75	5040.22	4914.36	2321.44	5260.73
P50446;Q922U2	Q922U2;P50446;Q8BGZ7;Q9Z331;A0A2R8VHP3;Q3UV11	K2C5_MOUSE;K2C6A_MOUSE	Krt5;Krt6a	Keratin, type II cytoskeletal 6A	39772.1	439597	70242.6	144260	74294.2	138434
P05622	P05622;E9QN12	PGFRB_MOUSE	Pdgfrb	Platelet-derived growth factor receptor beta	1817.01	1555.75	1519.89	1059.52	NA	NA
P01887	P01887	B2MG_MOUSE	B2m	Beta-2-microglobulin	7873.34	13051.5	16674.1	7537.43	7192.99	9697.62
Q8BH64	Q8BH64	EHD2_MOUSE	Ehd2	EH domain-containing protein 2	8567.68	3953.3	6854.54	4503.4	2498.89	5587.14
P47955	P47955	RLA1_MOUSE	Rplp1	60S acidic ribosomal protein P1	12658.4	8916.31	12081.2	8260.26	1577.86	12035.4
Q2TA50	Q2TA50	Q2TA50_MOUSE	Mlana	Melan-A	440349	359433	836051	777179	81139.9	204848
A0A0B4J1J7;A0A0G2JEU7	A0A0B4J1J7;A0A0G2JEU7	A0A0B4J1J7_MOUSE;A0A0G2JEU7_MOUSE	Ighv1-82	Immunoglobulin heavy variable 1-82	2641.46	8958.11	5574.65	NA	NA	3723.95
Q9R1B9	Q9R1B9;G3UY21;G3UYX7;A0A140T8T2	SLIT2_MOUSE	Slit2	Slit homolog 2 protein	2976.51	5522.36	3372.14	2580.22	3103.69	2049.91
Q99PU8	Q99PU8;A0A0G2JGL8	DHX30_MOUSE	Dhx30	ATP-dependent RNA helicase DHX30	2074	2618.27	1560.53	1682.31	NA	1035.17
Q9WTP6	Q9WTP6	KAD2_MOUSE	Ak2	Adenylate kinase 2, mitochondrial	289.378	602.975	1138.71	281.618	NA	601.807
O88746	O88746;Q3UDC3	TOM1_MOUSE	Tom1	Target of Myb protein 1	14603	18728.3	12968	10265.5	3369.12	16580.9
P60766	P60766	CDC42_MOUSE	Cdc42	Cell division control protein 42 homolog	121516	67512.7	153767	111231	12866.9	99899.4
Q80YX1	Q80YX1	TENA_MOUSE	Tnc	Tenascin	3176.93	5442.53	3240.46	2583.43	NA	NA
Q60715	Q60715;E9Q7B0	P4HA1_MOUSE	P4ha1	Prolyl 4-hydroxylase subunit alpha-1	2582.81	1083.23	1681.8	1289.05	1297.35	913.716
Q9CRG1	Q9CRG1;A0A0R4J0K4	TM7S3_MOUSE	Tm7sf3	Transmembrane 7 superfamily member 3	9576.28	16049.2	21993.4	13828.8	9348.94	7999.43
B2RXS4	B2RXS4	PLXB2_MOUSE	Plxnb2	Plexin-B2	28451.4	62330.6	61316.7	38087	20523.3	40999.5
P35762	P35762;A0A140LJL0	CD81_MOUSE	Cd81	CD81 antigen	445912	363907	840067	538038	21105	521513
O88569	O88569;A0A0N4SUM2	ROA2_MOUSE	Hnrnpa2b1	Heterogeneous nuclear ribonucleoproteins A2/B1	2914.98	3263.56	1670.5	1514.44	NA	1914.31
Q7TPR4	Q7TPR4;A1BN54	ACTN1_MOUSE	Actn1	Alpha-actinin-1	6430.73	8660.46	5031.41	5101.9	2809.21	5277.4
P47757	P47757;A2AMW0;F6YHZ8;F7CAZ6;A0A0A0MQI9	CAPZB_MOUSE	Capzb	F-actin-capping protein subunit beta	36473.8	10339.6	26502.3	18602.5	15730.3	13719.4
P50431;Q9CZN7	P50431;Q9CZN7;G3UYY1;G3UZ26	GLYC_MOUSE;GLYM_MOUSE	Shmt1;Shmt2	Serine hydroxymethyltransferase, cytosolic	6148.69	4170.4	2362	5707.53	2008.15	600.737
Q5Y5T2	Q5Y5T2	ZDH18_MOUSE	Zdhhc18	Palmitoyltransferase ZDHHC18	959.446	2925.8	2062.49	1364.51	1237.17	NA
Q3UPI1	Q3UPI1	GAK1B_MOUSE	GaskbB	Golgi-associated kinase 1B	1936.5	1567.15	1634.14	1694	895.553	783.688
A0A286YCV9;E9Q4K7	A0A286YCV9;E9Q4K7	A0A286YCV9_MOUSE;E9Q4K7_MOUSE	Kif13b	Kinesin family member 13B	564.503	NA	NA	370.732	NA	NA
Q03265	Q03265;D3Z6F5	ATPA_MOUSE	Atp5f1a	ATP synthase subunit alpha, mitochondrial	9990	14524.5	26061.6	15089.5	11755.8	6373.28
Q8BH61	Q8BH61	F13A_MOUSE	F13a1	Coagulation factor XIII A chain	44297.7	8368.78	39612.5	16622.6	1879.81	42115.6
Q03249	Q03249;A2AMS2;A2AMS3	GALT_MOUSE	Galt	Galactose-1-phosphate uridylyltransferase	3218.07	5007.8	1435.83	3230	1003.28	NA
Q05144	Q05144;A0A2R8VHH0	RAC2_MOUSE	Rac2	Ras-related C3 botulinum toxin substrate 2	1818.87	3651.74	1982.08	2197.73	1979.64	724.131
Q61233	Q61233	PLSL_MOUSE	Lcp1	Plastin-2	3314.89	7913.34	6784.33	4403.39	4507.7	2939.61
Q8CJH3	Q8CJH3	PLXB1_MOUSE	Plxnb1	Plexin-B1	4609.87	7015.17	8528.16	6990.2	2566.28	3712.36
P62751	P62751	RL23A_MOUSE	Rpl23a	60S ribosomal protein L23a	5012.55	15235.9	14915.2	7609.66	6562.73	9001.81
P83510;Q9JM52	P83510;Q9JM52;B2RUE8;A0A0A6YWR8;A0A0A6YW53;B9EKN8;B2RQ80;A0A0A6YWM8;B7ZNR9;E0CZD7;E0CZF8;F8VPL5;Q5SXG1;E9PUL9;A0A0A6YVZ8;Q5SXG3;E9PVG7;E0CY98;E0CYV5;E0CXD6;G3X9G2	MINK1_MOUSE;TNIK_MOUSE	Mink1;Tnik	Traf2 and NCK-interacting protein kinase	10559	14330.6	7363.71	8106.46	8139.07	5054.09
Q9ESE1	Q9ESE1;A0A0A6YXX3;E9Q3Y4;A0A0A6YXL6	LRBA_MOUSE	Lrba	Lipopolysaccharide-responsive and beige-like anchor protein	1080.45	584.158	854.856	703.635	NA	406.053
Q99KX1	Q99KX1	MLF2_MOUSE	Mlf2	Myeloid leukemia factor 2	8957.74	8097.53	11550	9569.42	3033.98	NA
P35285;Q921E2	P35285;Q921E2;Q3TXV4;Q3TM43;A2ARZ7;D6RFT6	RAB31_MOUSE;RB22A_MOUSE	Rab22a;Rab31	Ras-related protein Rab-22A	14518.3	36476.2	40533.6	18157.1	35932.3	6430.34
Q9CRB5	Q9CRB5	PR7C1_MOUSE	Prl7c1	Prolactin-7C1	38515.1	135155	68212.1	46342.3	101841	11759
Q80TQ2	Q80TQ2;A0A1B0GSE5;Z4YJJ5	CYLD_MOUSE	Cyld	Ubiquitin carboxyl-terminal hydrolase CYLD	2540.73	2445.36	2133.03	NA	NA	1569.47
Q5SSZ7	Q5SSZ7	ZNRF3_MOUSE	Znrf3	E3 ubiquitin-protein ligase ZNRF3	4158.98	5191.71	5934.7	4936.77	3456.23	1733.12
P70699	P70699;A2AFL3	LYAG_MOUSE	Gaa	Lysosomal alpha-glucosidase	9346.94	6836.61	9676.09	13234.4	1916.58	1980.68
O55022	O55022	PGRC1_MOUSE	Pgrmc1	Membrane-associated progesterone receptor component 1	1718.1	3853.11	2505.92	1785.23	NA	NA
P15116	P15116;D3YYT0	CADH2_MOUSE	Cdh2	Cadherin-2	7028.47	16784.7	12864.6	6772.63	10973.5	6578.75
Q62356	Q62356	FSTL1_MOUSE	Fstl1	Follistatin-related protein 1	1924.01	3547.92	2512.59	1934.91	2900.74	460.734
O88477	O88477	IF2B1_MOUSE	Igf2bp1	Insulin-like growth factor 2 mRNA-binding protein 1	665.706	1319.84	1019.85	864.05	536.828	595.462
Q9JIF3	Q9JIF3	GTR8_MOUSE	Slc2a8	Solute carrier family 2, facilitated glucose transporter member 8	1427.3	916.469	1652.82	1264.96	NA	505.054
O35607	O35607	BMPR2_MOUSE	Bmpr2	Bone morphogenetic protein receptor type-2	12867.1	18507.2	24836.3	12968.5	9701.16	14681.3
Q6NV83	Q6NV83	SR140_MOUSE	U2surp	U2 snRNP-associated SURP motif-containing protein	2536.24	3958.82	6281.14	2830.22	NA	NA
Q5SRY7	Q3ULA2;Q5SRY7;A0A286YDT6	FBW1B_MOUSE	Fbxw11	F-box/WD repeat-containing protein 11	1293.11	881.561	3297.46	1295	NA	1129.71
A0A0G2JDU4	A0A0G2JDU4	A0A0G2JDU4_MOUSE	Adgrl2	Adhesion G protein-coupled receptor L2 (Fragment)	821.096	NA	407.868	341.38	NA	475.503
Q8CFX1	Q8CFX1;A2A7A7	G6PE_MOUSE	H6pd	GDH/6PGL endoplasmic bifunctional protein	1172.71	NA	NA	1061.27	NA	497.821
Q69ZP3	Q69ZP3	PNKD_MOUSE	Pnkd	Probable hydrolase PNKD	1900.96	2609.58	5133.56	2536.72	1435.22	2445.96
O88572	O88572;A0A0R4J0A9	LRP6_MOUSE	Lrp6	Low-density lipoprotein receptor-related protein 6	7513.35	8422.11	7289.49	5588.92	5619.66	4311.54
O88413	O88413	TULP3_MOUSE	Tulp3	Tubby-related protein 3	4473.7	4377.68	2959.32	3687.1	2492.87	1737.73
Q61495;Q7TSF0;Q7TSF1	Q7TSF0;Q61495;Q7TSF1	DSG1A_MOUSE;DSG1B_MOUSE;DSG1C_MOUSE	Dsg1a;Dsg1b;Dsg1c	Desmoglein-1-alpha	531.09	3310.82	489.471	1788.57	405.321	710.477
P55144	P55144	TYRO3_MOUSE	Tyro3	Tyrosine-protein kinase receptor TYRO3	1236.08	2006.99	2141.08	1057.48	NA	1355.48
Q61301	Q61301;Q8BS72;E0CXB9	CTNA2_MOUSE	Ctnna2	Catenin alpha-2	NA	3673	NA	1768.33	3172.78	NA
P35802	P35802	GPM6A_MOUSE	Gpm6a	Neuronal membrane glycoprotein M6-a	42067	12925.7	15945.2	9195.34	NA	22650.3
Q9Z108	Q9Z108;Q9DBE7;V9GX87;A2A5R8;A2A5S3	STAU1_MOUSE	Stau1	Double-stranded RNA-binding protein Staufen homolog 1	2531.95	3313.33	2371.25	1994.42	1579.53	1960.85
P17182;P21550	P17183;P21550;P17182;Q6PHC1;A0A0N4SUX5;D3Z6E4;J3QPZ9	ENOA_MOUSE;ENOB_MOUSE	Eno1;Eno3	Alpha-enolase	28020.8	17617.5	95257.8	42266.9	5152.42	47574.7
P70168	P70168	IMB1_MOUSE	Kpnb1	Importin subunit beta-1	21292	18680.3	18768.6	17314.3	5008.01	17301.8
Q6ZWU9;Q6ZWY3	Q6ZWU9;Q6ZWY3;D6RH49;D3YYB0;A0A0G2JDW7;A0A0G2JG29	RS27L_MOUSE;RS27_MOUSE	Rps27;Rps27l	40S ribosomal protein S27	8815.52	14493	10316.1	8933.77	8490.73	5264.55
Q8R2Q8	Q8R2Q8	BST2_MOUSE	Bst2	Bone marrow stromal antigen 2	8603.46	10208.4	20143.3	9251.83	1694.93	15341.6
Q8R3P2	Q8R3P2;A0A0R4IZY1	DTX2_MOUSE	Dtx2	Probable E3 ubiquitin-protein ligase DTX2	2912.98	4058.8	2719.87	2887.27	2269.19	1389.59
Q8R1F1	Q8R1F1	NIBA2_MOUSE	Niban2	Protein Niban 2	14156.9	17456.3	14092.5	12104	9873.34	8908.61
P21237	P21237;H9H9S8	BDNF_MOUSE	Bdnf	Brain-derived neurotrophic factor	NA	1022.48	NA	NA	NA	690.991
Q9EST5	Q9EST5	AN32B_MOUSE	Anp32b	Acidic leucine-rich nuclear phosphoprotein 32 family member B	8397.83	6073.6	9470.71	4215.36	NA	6589.28
P52293	P52293	IMA1_MOUSE	Kpna2	Importin subunit alpha-1	8768.97	6655.62	8722.04	6043.19	1088.8	9238.64
Q91V12	Q91V12;E9PYH2	BACH_MOUSE	Acot7	Cytosolic acyl coenzyme A thioester hydrolase	5813.38	3903.37	2313.34	3029.41	NA	2410.98
A2BE28	A2BE28	LAS1L_MOUSE	Las1l	Ribosomal biogenesis protein LAS1L	1921.39	1373.25	1097.65	993.34	NA	NA
P35980	P35980;A0A1B0GQU8;A0A1B0GSS8;A0A1B0GSA8	RL18_MOUSE	Rpl18	60S ribosomal protein L18	35745.5	137319	176465	114124	48415.4	74717.3
P62082	P62082	RS7_MOUSE	Rps7	40S ribosomal protein S7	26581	35357	27462.3	18560.8	19514.5	22630
P17742	P17742;V9GXC1;V9GX31	PPIA_MOUSE	Ppia	Peptidyl-prolyl cis-trans isomerase A	304252	143293	742007	309166	162183	336775
Q9R0E2	Q9R0E2;F6WNR1	PLOD1_MOUSE	Plod1	Procollagen-lysine,2-oxoglutarate 5-dioxygenase 1	29760.1	14399.6	14612.3	17623.7	11615	10713.3
A0A5F8MPZ2;E9Q7C9;Q5UE59;Q7TNF4;Q8CD76	Q8CD76;Q5UE59;Q7TNF4;A0A5F8MPZ2;E9Q7C9	A0A5F8MPZ2_MOUSE;E9Q7C9_MOUSE;Q5UE59_MOUSE;Q7TNF4_MOUSE;Q8CD76_MOUSE	Klc1	Kinesin light chain	1782.77	NA	NA	NA	1211.93	NA
Q91Z67	Q91Z67;A0A087WS59;A0A087WNM1;A0A087WSQ1	SRGP2_MOUSE	Srgap2	SLIT-ROBO Rho GTPase-activating protein 2	2623.44	1395.16	2399.68	590.545	NA	2318.6
P62309	P62309	RUXG_MOUSE	Snrpg	Small nuclear ribonucleoprotein G	3126.33	NA	9289.35	4695.34	NA	3768.58
Q61781	Q61781	K1C14_MOUSE	Krt14	Keratin, type I cytoskeletal 14	575.081	4283.8	2306.07	1627.01	NA	1629.7
O35103	O35103	OMD_MOUSE	Omd	Osteomodulin	8139.09	15596.6	6851.55	9020.69	1870.01	9977.68
P62878	P62878;A0A2R8W6G1	RBX1_MOUSE	Rbx1	E3 ubiquitin-protein ligase RBX1	1802.7	NA	1130.8	1617.5	NA	384.66
Q61599	Q61599;A0A0N4SVH4	GDIR2_MOUSE	Arhgdib	Rho GDP-dissociation inhibitor 2	6622.14	3903.46	4768.13	2307.48	3150.8	4984.09
P45591	P45591;A0A1Y7VJ71	COF2_MOUSE	Cfl2	Cofilin-2	25335.5	35279.6	37875.6	21468.4	6034.88	39754.2
P32883;Q61411	P32883;Q61411;C0H5X4	RASH_MOUSE;RASK_MOUSE	Hras;Kras	GTPase KRas	12731.7	25398	31222.5	13595.5	NA	18006.4
Q80WQ2	Q80WQ2;A0A1D5RLY2	VAC14_MOUSE	Vac14	Protein VAC14 homolog	1286.64	1365.04	358.139	1134.61	NA	237.748
P19253	P19253;A0A1B0GS68;A0A1B0GSF0;A0A1B0GSQ6;A0A1B0GQW6;A0A1B0GTA1	RL13A_MOUSE	Rpl13a	60S ribosomal protein L13a	61985.3	63729.2	60796.3	71581.6	22000.6	34436.3
Q61702	Q61702;F8WJ05	ITIH1_MOUSE	Itih1	Inter-alpha-trypsin inhibitor heavy chain H1	6585.23	4655.59	NA	3294.23	2976.14	5333.73
Q04519	Q04519	ASM_MOUSE	Smpd1	Sphingomyelin phosphodiesterase	3076.23	3164.98	1889.85	2857.94	873.17	NA
O70251	O70251;A0A087WS46	EF1B_MOUSE	Eef1b	Elongation factor 1-beta	2996.86	11389.4	16670.8	8025	9423.15	3937.39
Q9WU78	Q9WU78	PDC6I_MOUSE	Pdcd6ip	Programmed cell death 6-interacting protein	700630	458919	642069	556468	228307	455942
Q99LD9	Q99LD9;D3Z7J6;D3Z487	EI2BB_MOUSE	Eif2b2	Translation initiation factor eIF-2B subunit beta	293.785	NA	NA	119.95	NA	284.729
P35235	P35235	PTN11_MOUSE	Ptpn11	Tyrosine-protein phosphatase non-receptor type 11	5478.76	4142.53	4924.98	4340.07	2876.14	2808.87
Q8VCF1	Q8VCF1	CANT1_MOUSE	Cant1	Soluble calcium-activated nucleotidase 1	3817.86	2500.33	2400.39	3183.55	858.623	1970.97
P70335;P70336	P70336;P70335;A0A1Y7VMN0;A0A3Q4EGR2;F8VPK5;A0A3Q4L2X0	ROCK1_MOUSE;ROCK2_MOUSE	Rock1;Rock2	Rho-associated protein kinase 1	NA	3498.77	1739.88	2339.61	1274.23	NA
P70424	P70424	ERBB2_MOUSE	Erbb2	Receptor tyrosine-protein kinase erbB-2	2014.97	4282.63	2147.84	1950.8	1923.98	1955.79
Q8BMS9	Q8BMS9	RASF2_MOUSE	Rassf2	Ras association domain-containing protein 2	1570.65	1664.49	1044.2	1647.6	347.343	959.439
Q9QXS1	Q9QXS1;E9Q3W4	PLEC_MOUSE	Plec	Plectin	4067.02	3157.99	2917.35	2941.55	NA	1729.01
P37889	P37889	FBLN2_MOUSE	Fbln2	Fibulin-2	277.838	2526.27	5812.97	NA	NA	1984.81
Q3UH60;Q8BWT5	Q3UH60;Q8BWT5;B7ZMZ7;B2RQ71;B2RQC7;F8WI56;E9PWR4;D3Z7D3	DIP2A_MOUSE;DIP2B_MOUSE	Dip2a;Dip2b	Disco-interacting protein 2 homolog B	28697.2	19955.9	6628.58	13338.7	12781.2	12089.1
Q8BWT5	Q8BWT5;B7ZMZ7;B2RQ71;F8WI56;E9PWR4;A0A1Y7VMZ0;D3Z7D3	DIP2A_MOUSE	Dip2a	Disco-interacting protein 2 homolog A	15194	14666.3	8303.31	10844.2	5969.41	9571.39
P62702	P62702;V9GWY0	RS4X_MOUSE	Rps4x	40S ribosomal protein S4, X isoform	50306.7	46015.3	64093.7	27267.1	43582.2	40073.8
Q920E5	Q920E5;A0A0G2JE82	FPPS_MOUSE	Fdps	Farnesyl pyrophosphate synthase	1068.32	NA	5645.04	NA	1121.4	3521.01
Q8R5H1	Q8R5H1	UBP15_MOUSE	Usp15	Ubiquitin carboxyl-terminal hydrolase 15	2371.04	2939.51	1359.51	2592.82	651.237	1373.15
P35441	P35441;Q80YQ1	TSP1_MOUSE	Thbs1	Thrombospondin-1	147224	243566	276432	151877	210381	99747.8
Q9CXW3	Q9CXW3	CYBP_MOUSE	Cacybp	Calcyclin-binding protein	2780.49	NA	2208.61	1912	NA	1544.73
P35822	P35822;A0A1W2P7Y1;B2RRF0	PTPRK_MOUSE	Ptprk	Receptor-type tyrosine-protein phosphatase kappa	3004.95	2444.74	2874.19	1794.18	2625.88	1351.9
P63024	P63024	VAMP3_MOUSE	Vamp3	Vesicle-associated membrane protein 3	3451.26	2566.99	8880.95	3451.55	NA	NA
Q02788	Q02788;D3Z7D5	CO6A2_MOUSE	Col6a2	Collagen alpha-2(VI) chain	49595.3	23508.4	62740.5	60096.5	11018.3	23345.5
Q8R0Z6	Q8R0Z6	ANGL6_MOUSE	Angptl6	Angiopoietin-related protein 6	2252.04	714.976	1740.23	1091.14	NA	NA
A2APV2;Q6ZPF4	Q6ZPF4;A2APV2;F8VPR2;A2AQW2;D3Z7A7;E9PXE6	FMNL2_MOUSE;FMNL3_MOUSE	Fmnl2;Fmnl3	Formin-like protein 2	4966.47	8904.94	3608.43	4439.67	2859.01	4895.36
Q9WVH9	Q9WVH9;A0A1Y7VJW9	FBLN5_MOUSE	Fbln5	Fibulin-5	34284.6	25363.9	31713.3	37603.5	6196.48	20008.1
Q8R059	Q8R059	GALE_MOUSE	Gale	UDP-glucose 4-epimerase	7689.34	5452.88	3660.23	6015.59	1815.52	NA
P14131	P14131	RS16_MOUSE	Rps16	40S ribosomal protein S16	70534	66788.5	37828.9	35420.7	58130	29006.4
Q8VD75	Q8VD75;A0A0J9YUA3	HIP1_MOUSE	Hip1	Huntingtin-interacting protein 1	15303.5	12336.4	11067.1	11330.3	7532.79	8254.18
D3YXG0	D3YXG0	HMCN1_MOUSE	Hmcn1	Hemicentin-1	171840	347536	202656	146966	245691	113815
Q3TC72	Q3TC72;A0A0R4J094	FAHD2_MOUSE	Fahd2	Fumarylacetoacetate hydrolase domain-containing protein 2A	12776.3	4544.78	3129.98	7925.57	3490.63	2931.26
Q3UGC7;Q66JS6	Q3UGC7;Q66JS6	EI3JA_MOUSE;EI3JB_MOUSE	Eif3j1;Eif3j2	Eukaryotic translation initiation factor 3 subunit J-A	NA	1561.74	NA	1316.54	381.413	1594.46
P29319	P29319;Q62413;Q60629;B7ZNN5;E9PUQ2;Q8BRB1;Q6PFV6;E9PUQ4;E9PUP9;G1K381;E9PUQ0	EPHA3_MOUSE	Epha3	Ephrin type-A receptor 3	75369	103080	94201.1	60884.3	64830.9	65949.5
P60710;P62737;Q8BFZ3	Q8BFZ3;P63268;P63260;P62737;P60710;P68134;P68033;A0A0U1RQ96;E9Q5F4;E9Q1F2	ACTA_MOUSE;ACTBL_MOUSE;ACTB_MOUSE	Acta2;Actb;Actbl2	Actin, cytoplasmic 1	421570	405002	696856	489012	152187	430456
A0A286YCX6	A0A286YCX6	A0A286YCX6_MOUSE	Trappc8	Trafficking protein particle complex 8	1557.61	NA	NA	1105.35	NA	1087.76
P11157	P11157	RIR2_MOUSE	Rrm2	Ribonucleoside-diphosphate reductase subunit M2	1431.68	1783.83	1247.27	761.348	NA	1333.66
P97321	P97321;G3UXR2	SEPR_MOUSE	Fap	Prolyl endopeptidase FAP	5681.92	860.225	2066.17	3536.27	1629.65	896.105
Q921M3	Q921M3	SF3B3_MOUSE	Sf3b3	Splicing factor 3B subunit 3	3196.81	4702.4	3756.62	3426.06	2068.73	2718.51
B1AT66	B1AT66	MOT7_MOUSE	Slc16a6	Monocarboxylate transporter 7	1486.2	3111.95	3135.73	2461.04	NA	1172.63
Q8BVQ5	Q8BVQ5;A0A140LI84	PPME1_MOUSE	Ppme1	Protein phosphatase methylesterase 1	2552.51	1099.14	1227.41	1788.61	890.32	763.805
Q9Z1F6	Q9Z1F6;G5E8Z6	CNMD_MOUSE	Cnmd	Leukocyte cell-derived chemotaxin 1	13097.2	5064.09	7618.42	6065.03	NA	NA
Q9D0R8	Q9D0R8;A0A0A0MQC9	LSM12_MOUSE	Lsm12	Protein LSM12 homolog	4645.59	3246.7	6454.9	4482.08	2621.59	3024.57
Q8CG19	Q8CG19;B1B1E2;A0A3Q4EGK3	LTBP1_MOUSE	Ltbp1	Latent-transforming growth factor beta-binding protein 1	1504.56	1009.27	1375.66	1101.8	NA	728.77
Q8C0L8	Q8C0L8	COG5_MOUSE	Cog5	Conserved oligomeric Golgi complex subunit 5	1197.23	NA	NA	845.221	NA	NA
Q9CQ71	Q9CQ71	RFA3_MOUSE	Rpa3	Replication protein A 14 kDa subunit	2336.1	1822.33	957.804	1185.84	NA	1227.26
P63037	P63037;B1AXY0;B1AXY1;B1AXX9	DNJA1_MOUSE	Dnaja1	DnaJ homolog subfamily A member 1	330633	90265.3	272966	189533	19908.9	281587
Q9DCF9	Q9DCF9	SSRG_MOUSE	Ssr3	Translocon-associated protein subunit gamma	1712.86	617.733	2275.79	1086.88	NA	NA
Q9CXF4	Q9CXF4	TBC15_MOUSE	Tbc1d15	TBC1 domain family member 15	2312.38	1483.48	586.716	1034.44	NA	NA
P61979	P61979;H3BKD0;A0A286YDH1;B2M1R6;Q8BT23;A0A286YEC4;H3BKI8;A0A286YCM2;H3BK96;A0A286YDM3	HNRPK_MOUSE	Hnrnpk	Heterogeneous nuclear ribonucleoprotein K	13886.7	13070.3	9876.61	9082.19	6633.75	10411.6
Q8BTZ7	Q8BTZ7	GMPPB_MOUSE	Gmppb	Mannose-1-phosphate guanyltransferase beta	8209.09	3094.04	6277.72	4758.99	NA	3558.54
Q61810	Q61810	LTBP3_MOUSE	Ltbp3	Latent-transforming growth factor beta-binding protein 3	851.153	1413.06	1259.42	1196.6	1134.82	169.718
Q32NY4;Q69ZF7	Q69ZF7;Q32NY4	CNNM3_MOUSE;CNNM4_MOUSE	Cnnm3;Cnnm4	Metal transporter CNNM3	2242.25	3568.46	1760.21	1391.3	3753.38	232.33
Q9WVM3	Q9WVM3;D3YU58	APC7_MOUSE	Anapc7	Anaphase-promoting complex subunit 7	2996.24	1049.66	660.588	1793.44	651.817	898.246
Q9ES97	Q9ES97	RTN3_MOUSE	Rtn3	Reticulon-3	7694.35	3471.34	NA	1884.96	NA	6048.25
P70335	P70335	ROCK1_MOUSE	Rock1	Rho-associated protein kinase 1	2506.59	540.809	NA	667.561	NA	1498.52
P35276	P35276;D3YW33;D3YWL1	RAB3D_MOUSE	Rab3d	Ras-related protein Rab-3D	1623.74	2129.99	NA	2098.79	NA	569.987
O54946	O54946;Q9QYI5;A0A087WP03;A0A0G2JER9;F6YRQ2	DNJB6_MOUSE	Dnajb6	DnaJ homolog subfamily B member 6	7387.92	12290.2	11107.2	8901.33	2378.06	10608.1
Q8BGJ0	Q8BGJ0	ZDH15_MOUSE	Zdhhc15	Palmitoyltransferase ZDHHC15	1951.54	4281.49	3134.67	1862.03	910.155	3894.53
P60521	P60521	GBRL2_MOUSE	Gabarapl2	Gamma-aminobutyric acid receptor-associated protein-like 2	6217.83	8456.92	8857	3932.68	6628.73	6192.02
P39688;Q04736	P39688;Q04736;D3YZ57	FYN_MOUSE;YES_MOUSE	Fyn;Yes1	Tyrosine-protein kinase Fyn	44549.7	37990.6	55176.7	43573.4	NA	21800.9
Q9QXP6	Q9QXP6;Q99LD7;Q8C5V4;F6S742;F6WPC3;E9QAG7	MKRN1_MOUSE	Mkrn1	E3 ubiquitin-protein ligase makorin-1	4246.28	7011.24	6484.66	5073.2	3358.18	4209.37
Q99LU0;Q9CQD4	Q9CQD4;Q99LU0	CH1B1_MOUSE;CH1B2_MOUSE	Chmp1b1;Chmp1b2	Charged multivesicular body protein 1b-1	22907.3	88911.3	61157.5	34286.2	70301.9	18685.8
P97857	P97857;E9PY08	ATS1_MOUSE	Adamts1	A disintegrin and metalloproteinase with thrombospondin motifs 1	10334.5	22042.1	16297	10690.8	13301.1	10730.4
P35585	P35585	AP1M1_MOUSE	Ap1m1	AP-1 complex subunit mu-1	2512.18	1565.92	1545.71	1566.45	NA	1109.36
Q5U4D9	Q5U4D9;D3Z132	THOC6_MOUSE	Thoc6	THO complex subunit 6 homolog	1323.39	748.602	1218.48	1102.06	NA	463.673
Q7TNV0	Q7TNV0;D3YVJ6;E9Q8Y1	DEK_MOUSE	Dek	Protein DEK	1661.14	NA	2715.42	1563.58	NA	NA
Q66JY6	Q66JY6	ARG39_MOUSE	Arhgef39	Rho guanine nucleotide exchange factor 39	7294.4	6852.29	5443.65	3581.97	6518.78	3902.66
Q9CWW6	Q9CWW6	PIN4_MOUSE	Pin4	Peptidyl-prolyl cis-trans isomerase NIMA-interacting 4	236.786	101.7	882.147	290.953	NA	NA
P47963	P47963	RL13_MOUSE	Rpl13	60S ribosomal protein L13	41340.3	24462.4	49370	42082.6	2795.94	37545.2
O88572;Q91VN0;Q91ZX7	O88572;Q91ZX7;Q91VN0;A0A0N4SUL9;A0A0R4J0A9;H3BL52;H3BJH0;A0A0R4J0I9	LRP1_MOUSE;LRP5_MOUSE;LRP6_MOUSE	Lrp1;Lrp5;Lrp6	Low-density lipoprotein receptor-related protein 6	1158.8	2182.93	2344.73	1273.51	1440.85	NA
Q9WTI7	Q9WTI7	MYO1C_MOUSE	Myo1c	Unconventional myosin-Ic	24750.2	32660	27020.2	17247	15553.6	27653.6
Q91W53	Q9D428;Q91W53	GOGA7_MOUSE	Golga7	Golgin subfamily A member 7	20334.2	57171.8	27899.1	34909.3	7271.57	33313.2
Q9QUM0	Q9QUM0	ITA2B_MOUSE	Itga2b	Integrin alpha-IIb	11673.8	12063.1	14443	17311	926.927	NA
Q9WV66	Q9WV66	MARH7_MOUSE	Marchf7	E3 ubiquitin-protein ligase MARCHF7	1745.1	4582.67	4432.43	4242.19	1256.2	2223.35
Q9JKX6	Q9JKX6;A2ATT5;A0A0A6YVU1	NUDT5_MOUSE	Nudt5	ADP-sugar pyrophosphatase	3885.41	2779.76	NA	2394.34	NA	NA
O35608	O35608	ANGP2_MOUSE	Angpt2	Angiopoietin-2	9617.14	11738.5	8929.71	5942.74	8794.83	7044.63
P80317;Q61390	Q61390;P80317;B1AT05;A0A571BEL9	TCPW_MOUSE;TCPZ_MOUSE	Cct6a;Cct6b	T-complex protein 1 subunit zeta	21632.6	24646	15785.5	20706.2	16767.4	7166.21
P40749	P40749	SYT4_MOUSE	Syt4	Synaptotagmin-4	250829	808395	645416	441312	315158	469600
Q8R105	Q8R105;A0A494BAY0;A0A494BB07;A0A494BAR3	VP37C_MOUSE	Vps37c	Vacuolar protein sorting-associated protein 37C	21378.7	7202.31	29541.8	17483.6	7956.01	16384.6
A0A0R4J065	A0A0R4J065	A0A0R4J065_MOUSE	Atg4b	Cysteine protease	2148.75	488.401	2437.13	986.954	NA	1448.85
P18760;P45591	P18760;P45591;F8WGL3;A0A494B9A7	COF1_MOUSE;COF2_MOUSE	Cfl1;Cfl2	Cofilin-1	27231.2	361132	319566	162913	257570	89352.5
Q8BWP8	Q8BWP8	B4GA1_MOUSE	B4gat1	Beta-1,4-glucuronyltransferase 1	930.068	4540.01	1969.73	2898.13	NA	674.055
Q99K51	Q99K51;A0A1C7CYV0;B1AX58	PLST_MOUSE	Pls3	Plastin-3	5657.61	5189.07	5479.51	3679.37	2083.08	5999.2
Q922E4	Q922E4;A2ABY3	PCY2_MOUSE	Pcyt2	Ethanolamine-phosphate cytidylyltransferase	6317.24	3858.18	3249.58	7612.85	654.621	1412.11
P10853;P10854;Q64475;Q64478;Q64525;Q6ZWY9;Q8CGP1;Q8CGP2	Q6ZWY9;Q64475;P10853;Q8CGP2;Q64478;P10854;Q8CGP1;Q64525;Q8CBB6	H2B1B_MOUSE;H2B1C_MOUSE;H2B1F_MOUSE;H2B1H_MOUSE;H2B1K_MOUSE;H2B1M_MOUSE;H2B1P_MOUSE;H2B2B_MOUSE	H2bc12;H2bc14;H2bc3;H2bc4;H2bc7;H2bc9;Hist1h2bp;Hist2h2bb	Histone H2B type 1-F/J/L	187088	124450	146376	77434.4	156659	96095.6
Q3TCH7	Q3TCH7;E9PXT5;F6UV36	CUL4A_MOUSE	Cul4a	Cullin-4A	2188.04	2242.22	793.663	1726.19	NA	788.714
P35951	P35951;A0A1L1SRE8	LDLR_MOUSE	Ldlr	Low-density lipoprotein receptor	27813.6	74538.6	75685.2	33680.1	46007.9	48931.9
Q8BY89	Q8BY89;A0A1L1SVG6	CTL2_MOUSE	Slc44a2	Choline transporter-like protein 2	27764.5	12219.7	45828.7	21716.7	16319.7	24005.9
Q5U4H9	Q5U4H9;E9Q2H3;E9Q0D2	Q5U4H9_MOUSE	Ncoa4	Nuclear receptor coactivator 4	2522.69	21282.4	11048.5	4828.14	10840.7	9533.82
Q91W86	Q91W86	VPS11_MOUSE	Vps11	Vacuolar protein sorting-associated protein 11 homolog	1660.99	NA	575.692	1003.02	615.097	NA
Q8CG16	Q8CG16;Q8CFG9	C1RA_MOUSE	C1ra	Complement C1r-A subcomponent	27736.3	34735.3	25217.9	30225.6	22328	10913
P09041	P09041	PGK2_MOUSE	Pgk2	Phosphoglycerate kinase 2	NA	16061.8	16706	19748	11542.7	4312.7
P49282	P49282	NRAM2_MOUSE	Slc11a2	Natural resistance-associated macrophage protein 2	6575.56	NA	5752.37	3391.81	NA	5546.9
E9Q6E5;F6RDI8;Q3UIX4	Q3UIX4;E9Q6E5;F6RDI8;A0A0G2JEG1	E9Q6E5_MOUSE;F6RDI8_MOUSE;Q3UIX4_MOUSE	Srsf11	Serine and arginine-rich-splicing factor 11	2628.88	2479.87	1473.56	2819.17	1068.47	885.183
Q9JIL5	Q9JIL5	TULP4_MOUSE	Tulp4	Tubby-related protein 4	3056.56	5492.57	6865.62	2680.22	3955.31	4544.13
P58854	P58854	GCP3_MOUSE	Tubgcp3	Gamma-tubulin complex component 3	1776.26	1133.47	2319.98	2569.01	471.557	753.346
P59281	P59281;H7BX46;G3X932	RHG39_MOUSE	Arhgap39	Rho GTPase-activating protein 39	1499.58	1070.68	NA	NA	1198.48	668.351
Q9CQ26	Q9CQ26	STABP_MOUSE	Stambp	STAM-binding protein	9797.2	7838.51	10150.1	7424.86	6776.12	5993.97
E9Q6U4;Q3UWL8	Q3UWL8;Q6P0X1;E9Q8R1;E9Q4Q8;E9Q6U4	E9Q6U4_MOUSE;Q3UWL8_MOUSE	Pfdn4	Prefoldin subunit 4	1276.21	1829.46	NA	1690.55	125.078	1571.99
Q9DBG6	Q9DBG6;A2ACG7	RPN2_MOUSE	Rpn2	Dolichyl-diphosphooligosaccharide--protein glycosyltransferase subunit 2	3678.67	2025.36	4313.49	1795.92	NA	3064.21
Q99LS3	Q99LS3;A0A0J9YVH9;D3Z4T3	SERB_MOUSE	Psph	Phosphoserine phosphatase	969.588	920.145	NA	687.919	NA	NA
Q9CQM5	Q9CQM5	TXD17_MOUSE	Txndc17	Thioredoxin domain-containing protein 17	7208.5	10793	10438	6275.63	11658.1	2779.97
O35604	O35604	NPC1_MOUSE	Npc1	NPC intracellular cholesterol transporter 1	22805	35876.6	27134.2	30193.8	12608.4	19712.9
Q8CJ53	Q8CJ53	CIP4_MOUSE	Trip10	Cdc42-interacting protein 4	1071.22	1152.22	1355.55	655.374	NA	1083.52
Q8R5J9	Q8R5J9	PRAF3_MOUSE	Arl6ip5	PRA1 family protein 3	3770.4	466.595	NA	1545.62	NA	NA
P18654	P18654;B1AXN9	KS6A3_MOUSE	Rps6ka3	Ribosomal protein S6 kinase alpha-3	9028.45	5055.23	3144.88	6142.88	2021.22	4407.09
Q8R146	Q8R146;A0A0R4J107;A0A0A6YXV0	APEH_MOUSE	Apeh	Acylamino-acid-releasing enzyme	13050.2	7142.41	7913.99	7081.36	6858.6	6568.86
A2A5Z6	A2A5Z6	SMUF2_MOUSE	Smurf2	E3 ubiquitin-protein ligase SMURF2	12698.7	9765.16	9319.33	9170.49	6835.68	7223.27
Q5XPI3	Q5XPI3;Q05CH9	RN123_MOUSE	Rnf123	E3 ubiquitin-protein ligase RNF123	2831.07	326.414	NA	1099.77	NA	1208.74
Q9DCN2	Q9DCN2;F2Z456	NB5R3_MOUSE	Cyb5r3	NADH-cytochrome b5 reductase 3	4914.71	4992.62	3134.87	2253.31	NA	4106.27
Q07968	Q07968	F13B_MOUSE	F13b	Coagulation factor XIII B chain	48266.5	56195.5	59542.3	68611.4	28885.4	22489.3
Q9WU28	Q9WU28;H7BWX1	PFD5_MOUSE	Pfdn5	Prefoldin subunit 5	3696.94	4920.63	NA	NA	1943.63	4362.32
E9PVA8	E9PVA8	GCN1_MOUSE	Gcn1	eIF-2-alpha kinase activator GCN1	7284.29	4225.04	4718.61	5759.09	2712.16	3411.86
P28798	P28798;Q3U9N4;H3BJE0	GRN_MOUSE	Grn	Progranulin	3557.74	11167.7	12971.7	8785.95	4194.95	7305.26
O54798	O54798	BRS3_MOUSE	Brs3	Bombesin receptor subtype-3	8340.82	3465.52	9505.25	2042.49	NA	8374.55
P58466	P58466	CTDS1_MOUSE	Ctdsp1	Carboxy-terminal domain RNA polymerase II polypeptide A small phosphatase 1	2523.95	4354.14	5189.64	2901.41	1763.79	4186.05
Q9QYK7	Q9QYK7;Z4YLT8	RNF11_MOUSE	Rnf11	RING finger protein 11	9685.92	12703.2	22103.2	16767.5	2432.49	13434
Q8BGE6	Q8BGE6;A0A0R4J065;A0A087WNR6	ATG4B_MOUSE	Atg4b	Cysteine protease ATG4B	935.477	NA	NA	686.226	NA	NA
Q922U2	Q922U2	K2C5_MOUSE	Krt5	Keratin, type II cytoskeletal 5	13338.2	91765.8	36320.8	28700.4	39856.8	35210.1
Q810I0	Q810I0	VP37D_MOUSE	Vps37d	Vacuolar protein sorting-associated protein 37D	3225.67	2169.77	2437.93	1688.76	3151.35	908.005
Q8BGL3	Q8BGL3	Q8BGL3_MOUSE	Sult2a8	Sulfotransferase	13563.6	2518.88	6211.38	10218.4	NA	693.735
P21550	P21550;J3QPZ9	ENOB_MOUSE	Eno3	Beta-enolase	123414	84218.2	82192.5	103510	34818.3	74719.2
O54732	O54732	MMP15_MOUSE	Mmp15	Matrix metalloproteinase-15	NA	1707.96	1020.41	950.289	1056.95	NA
Q99M28	Q99M28	RNPS1_MOUSE	Rnps1	RNA-binding protein with serine-rich domain 1	4827.41	3519.75	8055.62	3420.25	NA	4626.66
Q61704	Q61704;A0A2I3BRQ3	ITIH3_MOUSE	Itih3	Inter-alpha-trypsin inhibitor heavy chain H3	151616	190271	195513	107683	163854	124028
O09106	P70288;O09106;Q8BQ10;A0A0R4J008	HDAC1_MOUSE	Hdac1	Histone deacetylase 1	5535.16	4069.12	3454.19	3795.04	NA	2617.49
Q60749	Q60749	KHDR1_MOUSE	Khdrbs1	KH domain-containing, RNA-binding, signal transduction-associated protein 1	3949.01	2505.13	6652.44	2800.18	3425.88	3428.32
Q9DBE0	Q9DBE0;A0A2R8VHX0;A0A2R8VK60;A0A2R8VHJ2	CSAD_MOUSE	Csad	Cysteine sulfinic acid decarboxylase	7884.38	8366.94	5466.37	8356.93	5007.04	2659.52
Q9CZ52	Q9CZ52;A0A0N4SV16;A0A0N4SUW7	ANTR1_MOUSE	Antxr1	Anthrax toxin receptor 1	7495.24	5665.32	17119.1	6540.97	9081.84	6720.86
P15920	P15920	VPP2_MOUSE	Atp6v0a2	V-type proton ATPase 116 kDa subunit a2	4374.43	7320.29	6690.57	3923.33	3845.36	5806.21
Q9EQP2	Q9EQP2	EHD4_MOUSE	Ehd4	EH domain-containing protein 4	20985	35779.1	30603.7	24037.8	13674.4	26803.3
Q8C166	Q8C166;E9Q806;B7ZCP7;B7ZCP4;B7ZCP6;V9GWY2;B7ZCP8;V9GX86;A3KGK7;B7ZCP5	CPNE1_MOUSE	Cpne1	Copine-1	8936.62	8108.51	7200.41	6476.57	4940.85	6492.93
Q8BM86	Q8BM86	LHPL6_MOUSE	Lhfpl6	LHFPL tetraspan subfamily member 6 protein	8594.63	3143.48	9559.99	5927.83	NA	4563.76
P13020	P13020	GELS_MOUSE	Gsn	Gelsolin	165379	81501.8	156466	100054	37984.1	160418
Q9ES74	Q9ES74	NEK7_MOUSE	Nek7	Serine/threonine-protein kinase Nek7	1601.65	2926.93	971.905	1423.13	NA	1291.42
P97384	P97384;D3Z7U0	ANX11_MOUSE	Anxa11	Annexin A11	114321	88964.4	117402	93964.2	39282.3	104370
Q7TT36	Q7TT36	AGRA3_MOUSE	Adgra3	Adhesion G protein-coupled receptor A3	3567.98	3850.4	6268.92	3819.61	1254.32	5068.88
O08709	O08709;Q6GT24;D3Z0Y2	PRDX6_MOUSE	Prdx6	Peroxiredoxin-6	8849.84	9729.39	13929.4	9094.45	1068.85	13928.9
Q9CY64	Q9CY64	BIEA_MOUSE	Blvra	Biliverdin reductase A	3529.71	4130.5	3220.82	2436.08	736.33	4903.08
P01029	P01029	CO4B_MOUSE	C4b	Complement C4-B	217106	166208	189872	162178	181499	81958.5
P35279	P35279;D3YV69	RAB6A_MOUSE	Rab6a	Ras-related protein Rab-6A	7432.43	11810.9	14017.4	12037.8	4024.71	8637.01
Q9JJN5	Q9JJN5	CBPN_MOUSE	Cpn1	Carboxypeptidase N catalytic chain	17405.8	3889.23	8601.57	8537.51	NA	6263.55
P39688	P39688;D3YZ57	FYN_MOUSE	Fyn	Tyrosine-protein kinase Fyn	18273.7	37366.2	30244.2	14008.5	35053.9	14782.8
Q61316;Q61699	Q61316;Q61699;Q3U2G2;E9Q0U7	HS105_MOUSE;HSP74_MOUSE	Hspa4;Hsph1	Heat shock 70 kDa protein 4	11990.3	14437.9	17455.4	16912.2	9160.41	6554.49
Q64442	Q64442	DHSO_MOUSE	Sord	Sorbitol dehydrogenase	20963.8	10725.7	11908	15014.5	213.507	17215.7
Q61781;Q9QWL7	Q61781;Q9QWL7	K1C14_MOUSE;K1C17_MOUSE	Krt14;Krt17	Keratin, type I cytoskeletal 14	922.58	19082.7	942.444	5076.21	6587.75	3927.12
Q9CQC8	Q9CQC8	SPG21_MOUSE	Spg21	Maspardin	2889.2	6114.97	2789.78	2747.03	2345.4	3688.6
P02798	P02798	MT2_MOUSE	Mt2	Metallothionein-2	16873.2	22488.7	31863.8	7621.87	30122.6	15299.2
Q6IQX7	Q6IQX7	CHSS2_MOUSE	Chpf	Chondroitin sulfate synthase 2	24167.6	25159.3	20817.8	22023.8	19539.1	10759
P46467	P46467	VPS4B_MOUSE	Vps4b	Vacuolar protein sorting-associated protein 4B	73548.8	35181.3	68259.8	33986.1	46480.6	51623.1
Q80VP1	Q80VP1	EPN1_MOUSE	Epn1	Epsin-1	2017.72	2540.18	3476.12	2095.89	2143.61	1757.26
P16092	P16092;A0A1B0GSZ6;J3QN85	FGFR1_MOUSE	Fgfr1	Fibroblast growth factor receptor 1	986.373	4751.43	NA	NA	2227.58	2063.54
P70428	P70428;E9Q1M5;A2AIG3;V9GX32	EXT2_MOUSE	Ext2	Exostosin-2	10689	5522.39	3612.59	8655.53	4218.3	1957.48
Q99JI6	Q99JI6	RAP1B_MOUSE	Rap1b	Ras-related protein Rap-1b	65994.2	16350.6	33912.2	38921.3	647.613	47414.5
Q9Z0T9	Q9Z0T9;B1AYG6;B1AYG7	ITB6_MOUSE	Itgb6	Integrin beta-6	162162	250577	261081	182888	153284	NA
Q91ZX7	Q91ZX7;A0A0R4J0I9	LRP1_MOUSE	Lrp1	Prolow-density lipoprotein receptor-related protein 1	47752.5	24882.3	19551	34579.5	18736.6	15694
A0A087WS16;D3YWD1;J3QQ16	J3QQ16;D3YWD1;E9PWQ3;A0A087WS16	A0A087WS16_MOUSE;D3YWD1_MOUSE;J3QQ16_MOUSE	Col6a3	Collagen, type VI, alpha 3	24030.6	27166.2	35818.5	33489.1	9565.45	22147.6
Q64729	Q64729;Q9D5H8;E9Q418	TGFR1_MOUSE	Tgfbr1	TGF-beta receptor type-1	16792.2	20327.1	14826.4	17522.6	11655.3	9758.56
P28352	P28352;F6QA74;D3Z124;D3Z6R9	APEX1_MOUSE	Apex1	DNA-(apurinic or apyrimidinic site) endonuclease	1126.35	NA	NA	801.502	NA	887.209
Q9QWG7	Q9QWG7	ST1B1_MOUSE	Sult1b1	Sulfotransferase family cytosolic 1B member 1	4197.25	854.367	886.644	3168.52	1065.73	219.163
Q8VD75;Q9JKY5	Q8VD75;Q9JKY5;A0A0J9YUA3;A0A0G2JFU3	HIP1R_MOUSE;HIP1_MOUSE	Hip1;Hip1r	Huntingtin-interacting protein 1	3941.1	7582.68	6969.81	4943.99	4978.89	3951.75
S4R1W8	S4R1W8	S4R1W8_MOUSE	Gapdh	Glyceraldehyde-3-phosphate dehydrogenase (Fragment)	1190.99	NA	NA	308.777	1053.24	1320.6
Q9QXL1	Q9QXL1;F8VQE2;E9Q0A4	KI21B_MOUSE	Kif21b	Kinesin-like protein KIF21B	1923.32	864.807	3215.08	914.584	NA	2091.2
P21956	P21956	MFGM_MOUSE	Mfge8	Lactadherin	274860	226299	285128	164737	199987	226766
P63017	P63017;Q504P4	HSP7C_MOUSE	Hspa8	Heat shock cognate 71 kDa protein	1192310	1463200	1463060	1287390	560020	1250900
Q8CFG0	Q8CFG0	SULF2_MOUSE	Sulf2	Extracellular sulfatase Sulf-2	13019.8	26510.7	19278.7	10183.8	16363.9	17733.3
F7B5B5;Q8VHM5	Q8VHM5;F7B5B5	F7B5B5_MOUSE;Q8VHM5_MOUSE	Hnrnpr	Heterogeneous nuclear ribonucleoprotein R	1284.39	270.115	2188.93	841.33	NA	1038.51
P10630	P10630;Q8BTU6;E9Q561;A0A338P6X5	IF4A2_MOUSE	Eif4a2	Eukaryotic initiation factor 4A-II	10437.8	1262.98	7200.74	5882.08	NA	3614.3
P16015	P16015	CAH3_MOUSE	Ca3	Carbonic anhydrase 3	10806.5	7276.77	9473.27	12048.5	NA	1796.71
P11087	P11087	CO1A1_MOUSE	Col1a1	Collagen alpha-1(I) chain	22580.6	36359.5	49915.9	20887.3	27550.4	33602.1
Q68FH0	Q68FH0;A2AS45;A2AS47	PKP4_MOUSE	Pkp4	Plakophilin-4	8035.82	6783.39	8787.17	8250.38	2546.57	6994.91
Q6NZJ6;Q80XI3	Q6NZJ6;Q80XI3;A0A0J9YUS5;A0A0J9YUC1;A0A0J9YVC1;E9Q9E1;A0A0R4J112;A2AMI7;A0A0N4SVL0;E9PVC6;A2AMI2;E9Q770;E9PVC5;Z4YKC4	IF4G1_MOUSE;IF4G3_MOUSE	Eif4g1;Eif4g3	Eukaryotic translation initiation factor 4 gamma 1	2917.09	2582.66	3056.01	3475.53	1377.15	1600.48
P62849	P62849;A0A286YEB7	RS24_MOUSE	Rps24	40S ribosomal protein S24	40558.4	17957.6	41834.6	28833.9	24878	22038
O70456;P61982;P62259;P63101;P68254;P68510;Q9CQV8	P68510;P63101;Q9CQV8;P68254;P61982;O70456;P62259;A2A5N1;D6REF3;F6WA09;D3YXN6;A0A2I3BQ03	1433B_MOUSE;1433E_MOUSE;1433F_MOUSE;1433G_MOUSE;1433S_MOUSE;1433T_MOUSE;1433Z_MOUSE	Sfn;Ywhab;Ywhae;Ywhag;Ywhah;Ywhaq;Ywhaz	14-3-3 protein sigma	88935.8	180554	82661.9	133842	64777.1	67475.7
P08556;P32883;Q61411	P08556;P32883;Q61411;Q9D091;C0H5X4;A0A0G2JE25;A0A0G2JGP4;A0A0G2JGM2	RASH_MOUSE;RASK_MOUSE;RASN_MOUSE	Hras;Kras;Nras	GTPase NRas	59103.3	124523	119174	79763.9	113725	35354.9
Q9DBA8	Q9DBA8	HUTI_MOUSE	Amdhd1	Probable imidazolonepropionase	5529.57	2495.93	3229.05	5219.17	2135.45	1155.79
O09159	O09159	MA2B1_MOUSE	Man2b1	Lysosomal alpha-mannosidase	4415.6	3836.65	2682.13	2371.64	3141.77	NA
Q8BZZ3	Q8BZZ3	WWP1_MOUSE	Wwp1	NEDD4-like E3 ubiquitin-protein ligase WWP1	3341.63	3119.9	4575.69	2916.57	1402.67	4039.5
P12970	P12970	RL7A_MOUSE	Rpl7a	60S ribosomal protein L7a	35031.3	33343.8	37011.4	33053.5	19752.7	27089.6
P28825	P28825;A0A0R4J043	MEP1A_MOUSE	Mep1a	Meprin A subunit alpha	479.765	2269.61	2356.76	1922.91	1799.22	151.896
Q91WB7	Q91WB7	UBTD1_MOUSE	Ubtd1	Ubiquitin domain-containing protein 1	18126.3	17628.3	36413.7	9276.25	34726.1	10756.8
Q9DCC4	Q9DCC4	P5CR3_MOUSE	Pycr3	Pyrroline-5-carboxylate reductase 3	1797.6	2031.41	4567.69	3879.35	1660.95	833.812
P54818	P54818;A0A1Y7VM63	GALC_MOUSE	Galc	Galactocerebrosidase	950.613	NA	1116.26	784.738	NA	NA
P62484	P62484;Q6AXH6;Q6AXD2;A0A087WR90;A0A087WPP8;A0A087WRS3;A0A087WNT3	ABI2_MOUSE	Abi2	Abl interactor 2	2410.15	NA	1122.54	1192.33	NA	1490.48
Q8BZZ3;Q8C863;Q9DBH0	Q8C863;Q8BZZ3;Q9DBH0;Q3TXI7;A0A1D5RM92	ITCH_MOUSE;WWP1_MOUSE;WWP2_MOUSE	Itch;Wwp1;Wwp2	NEDD4-like E3 ubiquitin-protein ligase WWP1	12746.9	7097.87	15979.9	16884.9	1103.68	9218.81
Q99K01	Q99K01;A0A0R4J034	PDXD1_MOUSE	Pdxdc1	Pyridoxal-dependent decarboxylase domain-containing protein 1	3385.57	1814.78	2170.89	2156.2	1538.76	1911.89
P97329	P97329	KI20A_MOUSE	Kif20a	Kinesin-like protein KIF20A	1049.08	1112.93	2170.49	1107.21	703.156	1485.41
Q62469	Q62469	ITA2_MOUSE	Itga2	Integrin alpha-2	1132.96	1414.27	732.57	1898.53	410.421	189.948
Q9QZ06	Q9QZ06;Q8C5G6;A9JEI5;F7AT44	TOLIP_MOUSE	Tollip	Toll-interacting protein	28476.2	28616.6	19634.7	25748.9	13635.6	19081.5
P47753;P47754	P47753;P47754;Q5RKN9;A0A0G2JE27;A0A0N4SVM0;D6RCW7	CAZA1_MOUSE;CAZA2_MOUSE	Capza1;Capza2	F-actin-capping protein subunit alpha-1	18888	6024.99	18558.2	10210.6	NA	11879.5
Q8CFI7	Q8CFI7	RPB2_MOUSE	Polr2b	DNA-directed RNA polymerase II subunit RPB2	5193.33	3354.98	1887.51	4569.43	1598.65	1786.61
Q9QZI8	Q9QZI8	SERC1_MOUSE	Serinc1	Serine incorporator 1	92009.6	177006	106452	124675	44543.9	117039
P82343	P82343;D6RHA2	RENBP_MOUSE	Renbp	N-acylglucosamine 2-epimerase	1372.14	NA	532.251	726.016	NA	NA
Q8BWU5	Q8BWU5;A0A0R4J1Y3;E0CXW7;E9QMF4	OSGEP_MOUSE	Osgep	Probable tRNA N6-adenosine threonylcarbamoyltransferase	1665.26	1360.72	NA	1154.08	NA	NA
P26040;P26041;P26043	P26043;P26040;P26041;Q7TSG6;A0A5F8MPB9	EZRI_MOUSE;MOES_MOUSE;RADI_MOUSE	Ezr;Msn;Rdx	Ezrin	49791.2	66774.8	63341.2	51948.8	22596.3	62703.4
Q9R0P5	Q9R0P5	DEST_MOUSE	Dstn	Destrin	16137	15895	40029.6	15376.6	19322.6	20380.2
Q6VN19	Q6VN19;A0A0R4J0G4	RBP10_MOUSE	Ranbp10	Ran-binding protein 10	3580.52	1301.51	2744.36	1943.58	NA	NA
O09167	O09167;Q9CQM8	RL21_MOUSE	Rpl21	60S ribosomal protein L21	16690.3	7277.54	15607.1	14919.4	1728.93	13610.4
Q8CI11	Q8CI11	GNL3_MOUSE	Gnl3	Guanine nucleotide-binding protein-like 3	2590.7	1828.43	NA	3024.37	681.48	1363.19
P84091	P84091;Q3TWV4	AP2M1_MOUSE	Ap2m1	AP-2 complex subunit mu	17848.6	32386.6	24795.4	20325.9	26638.6	10451.7
Q9EPU0	Q9EPU0	RENT1_MOUSE	Upf1	Regulator of nonsense transcripts 1	18292.6	19126.7	21338.8	18164	8506.83	18293.7
Q8K205;Q9D4G5	Q9D4G5;Q8K205	Q8K205_MOUSE;Q9D4G5_MOUSE	Pop1	Processing of 1, ribonuclease P/MRP family, (S. cerevisiae)	3231.02	2990.86	583.778	1790.71	1212.61	2205.17
Q8VE10	Q8VE10;A0A494B9D7	NAA40_MOUSE	Naa40	N-alpha-acetyltransferase 40	894.688	531.84	840.401	1173.09	343.282	218.751
A0A2R8VHF9;A0A338P6K2;E9QPE7	A0A2R8VHF9;A0A338P6K2;E9QPE7	A0A2R8VHF9_MOUSE;A0A338P6K2_MOUSE;E9QPE7_MOUSE	Myh11	Myosin-11	334.429	525.64	682.273	353.416	NA	434.135
Q8VEJ9	Q8VEJ9	VPS4A_MOUSE	Vps4a	Vacuolar protein sorting-associated protein 4A	38753	41885.3	29445.5	27281.3	35911.5	21131.4
Q9CZX8	Q9CZX8;S4R223;D3Z5R8;D3YUG3;D3Z722;D3YUT3	RS19_MOUSE	Rps19	40S ribosomal protein S19	39354	36475.8	41249.6	21687.3	41311.8	26689.8
P12382;P47857;Q9WUA3	P12382;Q9WUA3;P47857;Q8C605	PFKAL_MOUSE;PFKAM_MOUSE;PFKAP_MOUSE	Pfkl;Pfkm;Pfkp	ATP-dependent 6-phosphofructokinase, liver type	10299.4	8606.96	18515.5	16846.1	NA	2276.36
Q91YI0	Q91YI0;E0CY49	ARLY_MOUSE	Asl	Argininosuccinate lyase	15309.3	7232.79	7210.81	8157.9	9182.43	5502.9
P18406	P18406	CCN1_MOUSE	Ccn1	CCN family member 1	18888.7	34494.5	43448.2	18067.6	36152.7	20166.9
Q80U95	Q80U95	UBE3C_MOUSE	Ube3c	Ubiquitin-protein ligase E3C	1546.09	NA	NA	923.106	NA	1453.39
Q05895	Q05895;E9PWF0	TSP3_MOUSE	Thbs3	Thrombospondin-3	6619.04	5748.92	5521.52	5838.54	5821.96	2093.05
Q8CGB6	Q8CGB6;A0A2R8VHQ0	TNS2_MOUSE	Tns2	Tensin-2	2029.44	1967.47	2046.43	NA	1447.48	1653.15
Q8BZ03	Q8BZ03	KPCD2_MOUSE	Prkd2	Serine/threonine-protein kinase D2	2309.68	554.357	878.341	2291.14	193.799	396.822
Q8VE62	Q8VE62;D3Z3J6;G3UZ67;F6Y616;G3UYE5	PAIP1_MOUSE	Paip1	Polyadenylate-binding protein-interacting protein 1	2903.79	3724.03	NA	2553.18	NA	NA
P53690	P53690;A0A286YED2	MMP14_MOUSE	Mmp14	Matrix metalloproteinase-14	23510.9	61807.5	42359.6	20074.5	47289.6	31060.4
P63001;Q05144	P60764;P63001;Q05144;Q3TLP8;A2AC13;A0A2R8VHH0	RAC1_MOUSE;RAC2_MOUSE	Rac1;Rac2	Ras-related C3 botulinum toxin substrate 1	191669	160220	165861	170625	24696.8	203911
P05063	P05063	ALDOC_MOUSE	Aldoc	Fructose-bisphosphate aldolase C	1294.71	5179.95	1913.36	2541.27	505.255	3422.36
Q9DBG3	Q9DBG3;H3BIY9;H3BJ06;H3BKM0	AP2B1_MOUSE	Ap2b1	AP-2 complex subunit beta	28223.8	34428.8	24957.7	26821.7	20694.9	20054.6
Q3UPH1	Q3UPH1	PRRC1_MOUSE	Prrc1	Protein PRRC1	2448.49	1748.5	1208.21	2309.18	737.273	1123.93
Q9R0B9	Q9R0B9;E9Q718	PLOD2_MOUSE	Plod2	Procollagen-lysine,2-oxoglutarate 5-dioxygenase 2	10867.6	11589.9	10600.8	13075.7	6835.56	5599.27
P17879;Q61696	Q61696;P17879	HS71A_MOUSE;HS71B_MOUSE	Hspa1a;Hspa1b	Heat shock 70 kDa protein 1B	22785	31469.9	26431.7	26976	9835.57	25467.2
Q60631	Q60631;B1AT95;B1AT92	GRB2_MOUSE	Grb2	Growth factor receptor-bound protein 2	31401.2	27527.4	33182.7	29035.3	24885.3	17281.4
Q9DBY8	Q9DBY8	NVL_MOUSE	Nvl	Nuclear valosin-containing protein-like	948.841	NA	1148.43	811.203	NA	NA
Q8R081	Q8R081;G5E924;G3UY38	HNRPL_MOUSE	Hnrnpl	Heterogeneous nuclear ribonucleoprotein L	3444.24	3755.18	2943.04	3472.33	2490.23	1897.41
Q7TMK9	Q7TMK9;G3UXJ6;G3UWM1;G3UZI2;G3XA76;G3V018;A0A0R4J259	HNRPQ_MOUSE	Syncrip	Heterogeneous nuclear ribonucleoprotein Q	11203.6	9318.28	13168.5	11118.6	973.45	14023.6
O54754	O54754;G3X8P9	AOXA_MOUSE	Aox1	Aldehyde oxidase 1	12692.1	9455.18	3664.66	8587.05	4755.02	NA
Q9WV38	Q9WV38	GTR5_MOUSE	Slc2a5	Solute carrier family 2, facilitated glucose transporter member 5	15401.7	12507.8	18938.7	20468.3	4255.67	11608.7
Q3U1V6	Q3U1V6;A0A1B0GSG9	UEVLD_MOUSE	Uevld	Ubiquitin-conjugating enzyme E2 variant 3	12105.9	8165.49	4745.73	5207.82	6138.08	8090.3
Q6DFX2;Q9CZ52	Q9CZ52;Q6DFX2;A0A0N4SV16;A0A0G2JE26	ANTR1_MOUSE;ANTR2_MOUSE	Antxr1;Antxr2	Anthrax toxin receptor 2	3695.92	6851.01	7049.8	5395.54	3718.79	NA
E9Q2E4	E9Q2E4	E9Q2E4_MOUSE	Hectd4	HECT domain E3 ubiquitin protein ligase 4	735.651	757.207	503.233	605.959	NA	428.403
Q9WVC3	Q9WVC3	CAV2_MOUSE	Cav2	Caveolin-2	752.399	3241.62	2447.63	2218.98	NA	1119.75
Q76M72	Q76M72	S22AR_MOUSE	Slc22a27	Solute carrier family 22 member 27	6897.27	1923.85	3412.99	2872.61	NA	3476.09
Q3UPF5	Q3UPF5;D3Z5I1;G3X9X5	ZCCHV_MOUSE	Zc3hav1	Zinc finger CCCH-type antiviral protein 1	17165.8	14703.8	9565.07	10943.6	8555.63	12778.4
A0A0R4J0A9	A0A0R4J0A9	A0A0R4J0A9_MOUSE	Lrp6	Low-density lipoprotein receptor-related protein	583.404	1053.78	NA	996.734	272.203	644.189
Q9JIP6	Q9JIP6	FZD2_MOUSE	Fzd2	Frizzled-2	3568.04	6141.22	3949.13	4267.45	4090.31	2293.85
P63158	P63158;A0A0J9YUZ4;D3YVC6;D3YZ18;A0A0J9YUD8	HMGB1_MOUSE	Hmgb1	High mobility group protein B1	6377.45	2280.25	3031.85	3038.94	NA	NA
A0A0A6YW80;A0A0A6YX86;G3X8Y3	A0A0A6YW80;A0A0A6YX86;G3X8Y3	A0A0A6YW80_MOUSE;A0A0A6YX86_MOUSE;G3X8Y3_MOUSE	Naa15	N-alpha-acetyltransferase 15, NatA auxiliary subunit	1868.62	1049.68	NA	1415.2	1025.11	974.488
Q80WE4	Q80WE4	KI20B_MOUSE	Kif20b	Kinesin-like protein KIF20B	1323.86	2907.44	4544.69	1673.35	1699.33	3474.24
Q8CHU3	Q8CHU3;F7CUV7;Q5NCM5;Q5NCM6;J3QNT7	EPN2_MOUSE	Epn2	Epsin-2	6757.5	7937.78	1538.75	6065	2199.82	4404.6
Q9QXK3;Q9QZE5	Q9QZE5;Q9QXK3	COPG1_MOUSE;COPG2_MOUSE	Copg1;Copg2	Coatomer subunit gamma-2	2401.32	1470.03	311.67	2322.32	484.943	459.119
P62874	P62874;H3BKR2;H3BLF7	GBB1_MOUSE	Gnb1	Guanine nucleotide-binding protein G(I)/G(S)/G(T) subunit beta-1	178770	88542.3	262955	150189	46255.9	217713
Q31125	Q31125	S39A7_MOUSE	Slc39a7	Zinc transporter SLC39A7	3045.63	NA	2460.89	2150.73	NA	NA
P30999	P30999;E9Q8Z9;G3X9V2;E9Q8Z8;E9Q8Z6;E9Q905;D3Z2H7;E9Q8Z5;E9Q903;E9Q901;E9Q986;E9Q906;D3Z7H6;D3Z2H2;E9Q8Z4;E9Q907;E9Q904	CTND1_MOUSE	Ctnnd1	Catenin delta-1	21667.3	13646.7	16431.5	13377.7	11897.8	15156.8
P62874;P62880	P62880;P62874;E9PWM7;D3YZX3;E9QKR0	GBB1_MOUSE;GBB2_MOUSE	Gnb1;Gnb2	Guanine nucleotide-binding protein G(I)/G(S)/G(T) subunit beta-1	45555.3	27182.7	80406.1	32054.6	11626.4	76078.5
P19221	P19221;H7BX99	THRB_MOUSE	F2	Prothrombin	301811	43062.5	117278	218442	29586.3	113930
Q6NXH9	Q9Z2T6;Q9DCV7;P03995;Q6NXH9;E9Q1Z0	K2C73_MOUSE	Krt73	Keratin, type II cytoskeletal 73	22370.2	351634	67491.6	120326	112523	112959
O55135	O55135	IF6_MOUSE	Eif6	Eukaryotic translation initiation factor 6	3029.02	3760.05	4116.63	2886.97	NA	2808.29
B1AWE0;Q6PFA2	Q6PFA2;B1AWE0	B1AWE0_MOUSE;Q6PFA2_MOUSE	Clta	Clathrin light chain	73970	13800.2	100992	75250.1	211.694	72613.3
P11152	P11152	LIPL_MOUSE	Lpl	Lipoprotein lipase	10097	3320.24	4761.1	8480.15	3172.94	2619.89
Q91YP3	Q91YP3;A0A0N4SV34	DEOC_MOUSE	Dera	Deoxyribose-phosphate aldolase	9706.32	5719.09	3635.83	6959.54	4145.15	3871.31
Q9CQD1	Q9CQD1	RAB5A_MOUSE	Rab5a	Ras-related protein Rab-5A	12150.2	13789.7	15375.6	11574.1	7908.13	13026.4
Q8R143	Q8R143;E0CY65;F6TFF2	PTTG_MOUSE	Pttg1ip	Pituitary tumor-transforming gene 1 protein-interacting protein	10558	49801.5	65698.2	31550.5	41608	26040.4
Q9D1C8	Q9D1C8	VPS28_MOUSE	Vps28	Vacuolar protein sorting-associated protein 28 homolog	73441.9	63466.9	64631.9	52797	68491.8	37370.4
P20918	P20918	PLMN_MOUSE	Plg	Plasminogen	156282	464906	265413	245218	392450	61241.3
Q61194	Q61194;F8VPL2;A0A0U1RNH9	P3C2A_MOUSE	Pik3c2a	Phosphatidylinositol 4-phosphate 3-kinase C2 domain-containing subunit alpha	648.553	NA	528.611	167.394	NA	760.887
P62889	P62889;A0A2I3BQF4	RL30_MOUSE	Rpl30	60S ribosomal protein L30	24409.6	25321.4	35286.7	23510.7	14464.3	29094.5
Q9Z2A0	Q9Z2A0;Q3TRL2;F2Z400;F2Z3X6;F2Z3Z9	PDPK1_MOUSE	Pdpk1	3-phosphoinositide-dependent protein kinase 1	760.519	398.727	714.675	680.872	NA	305.146
Q6P1B1	Q6P1B1;Q3UE92;S4R1I3;A0A494BBG8	XPP1_MOUSE	Xpnpep1	Xaa-Pro aminopeptidase 1	13684.5	7198.25	7490	11033.5	4711.55	6662.82
A0A286YD76	Q69ZZ9;A0A286YD76	A0A286YD76_MOUSE	Macf1	Microtubule-actin cross-linking factor 1 (Fragment)	3029.62	2518.42	3644.33	2710.48	1146.18	3403.54
Q9JHU9	Q9JHU9	INO1_MOUSE	Isyna1	Inositol-3-phosphate synthase 1	2464.47	1439.09	893.942	1797.29	NA	729.673
Q9WVD4	Q9WVD4;B1ATV1	CLCN5_MOUSE	Clcn5	H(+)/Cl(-) exchange transporter 5	1274.41	733.113	913.375	936.047	NA	603.746
Q9D0F6	Q9D0F6	RFC5_MOUSE	Rfc5	Replication factor C subunit 5	2041.25	631.805	1377.45	1602.86	NA	533.342
Q921I1	Q921I1;E9Q2Q7;D3YYR8;E9Q939	TRFE_MOUSE	Tf	Serotransferrin	59552	128958	146984	72268.9	137338	55817.9
P04202	P04202	TGFB1_MOUSE	Tgfb1	Transforming growth factor beta-1 proprotein	1666.8	897.264	1724.51	526.955	1346.56	1520.29
Q9WVK4	Q9WVK4	EHD1_MOUSE	Ehd1	EH domain-containing protein 1	63887.3	58908.4	62323.1	47795.2	44986.2	53755.5
Q9JI10	Q9JI10;A0A2I3BQE0	STK3_MOUSE	Stk3	Serine/threonine-protein kinase 3	467.178	NA	NA	7.01713	NA	732.872
P08030	P08030;A0A1D5RLR6	APT_MOUSE	Aprt	Adenine phosphoribosyltransferase	29114.6	42251.7	16850.3	24687.6	30231.1	14968.2
P28659;Q9Z0H4	P28659;Q9Z0H4;A0A0R4J0T5	CELF1_MOUSE;CELF2_MOUSE	Celf1;Celf2	CUGBP Elav-like family member 1	2681.34	1307.15	3138.5	2467.53	NA	1297.33
P56399	P56399;Q3U4W8	UBP5_MOUSE	Usp5	Ubiquitin carboxyl-terminal hydrolase 5	12968.5	11510.1	12788.3	12823.4	7472.24	9235.32
Q9D8W5	Q9D8W5;Q3TRH2;B1AT36	PSD12_MOUSE	Psmd12	26S proteasome non-ATPase regulatory subunit 12	11814.2	6907.14	4591.17	8268.99	954.159	9274.29
Q8VCT3	Q8VCT3;E9PYF1	AMPB_MOUSE	Rnpep	Aminopeptidase B	4075.55	4115.32	5357.78	5164.57	2003.19	NA
P29595	P29595	NEDD8_MOUSE	Nedd8	NEDD8	6546.82	1412.46	4557.18	3898.46	NA	2723.38
Q9EQU5	Q9EQU5;A2BE93;A2BE92	SET_MOUSE	Set	Protein SET	2629.27	2759.29	1397.22	1547.23	NA	2043.26
P62835;Q99JI6	Q99JI6;P62835;A0A0G2JED9;A0A0G2JE52;A0A0G2JDL9	RAP1A_MOUSE;RAP1B_MOUSE	Rap1a;Rap1b	Ras-related protein Rap-1A	378455	206764	237663	297058	64365.5	292373
Q9WV95	Q9WV95	PHLA3_MOUSE	Phlda3	Pleckstrin homology-like domain family A member 3	7064.23	5963.56	6326.45	4930.22	2978.57	7471.98
Q91WG8	Q91WG8;Q3UW64;G3UYD5;G3UX23;G3UZ98	GLCNE_MOUSE	Gne	Bifunctional UDP-N-acetylglucosamine 2-epimerase/N-acetylmannosamine kinase	19782.1	13734.3	8785.85	17406.9	12405	3859.72
Q8C561	Q8C561	LMBD2_MOUSE	Lmbrd2	G-protein coupled receptor-associated protein LMBRD2	5068.99	4886.24	9078.16	6588.76	3746.08	4823.05
P62071	P62071	RRAS2_MOUSE	Rras2	Ras-related protein R-Ras2	8984.87	11712.1	7038.47	3069.08	12684.3	6335.53
P97801	P97801	SMN_MOUSE	Smn1	Survival motor neuron protein	1010.61	NA	266.186	648.769	NA	369.123
Q9D1G1	P62821;Q9D1G1;Q5SW88;A0A494BA38;Q5SW87;A0A494BBL7;A0A494B945	RAB1B_MOUSE	Rab1b	Ras-related protein Rab-1B	15907.3	17798.6	27923.5	21803	3151.12	24187.3
Q61490	Q61490;E9Q4G8;F6QH25;E9Q3Q6	CD166_MOUSE	Alcam	CD166 antigen	7859.86	13739.4	10907.8	6338.58	12009.2	7579.7
Q9WUL7	Q9WUL7;A0A494BAJ6	ARL3_MOUSE	Arl3	ADP-ribosylation factor-like protein 3	5779.81	9439.11	5310.04	7082.11	6069.75	3228.36
A0A140LHQ8	A0A140LHQ8	A0A140LHQ8_MOUSE	Picalm	Phosphatidylinositol-binding clathrin assembly protein (Fragment)	3436.54	129.589	5169.49	844.613	NA	3802.98
Q8BFY6	Q8BFY6	PEF1_MOUSE	Pef1	Peflin	10078.8	13387.8	5887.79	4264.74	7807.29	11374.7
O35640	O35640	ANXA8_MOUSE	Anxa8	Annexin A8	7156.04	12427.5	6812.9	10103.2	4094.59	6898.88
Q9JM14	Q9JM14;A2A9X5	NT5C_MOUSE	Nt5c	5'(3')-deoxyribonucleotidase, cytosolic type	1284.04	NA	1483.16	1105.83	NA	NA
Q3TYX2	Q3TYX2	LRN4L_MOUSE	Lrrn4cl	LRRN4 C-terminal-like protein	6156.35	5657.58	3290.83	5410.23	449.693	6215.14
P68368	P68369;P05213;P68373;Q3UX10;P68368;A0A0A0MQA5	TBA4A_MOUSE	Tuba4a	Tubulin alpha-4A chain	292777	186225	232310	405437	26129.6	137801
Q07076	Q07076;A0A2C9F2D2	ANXA7_MOUSE	Anxa7	Annexin A7	30047.7	28837.2	31527.1	27462.2	11068.4	33855.9
Q8VIJ6	Q8VIJ6	SFPQ_MOUSE	Sfpq	Splicing factor, proline- and glutamine-rich	2735.28	4919.33	5026.8	2324.99	NA	4447.76
Q99JX4	Q99JX4	EIF3M_MOUSE	Eif3m	Eukaryotic translation initiation factor 3 subunit M	5496.63	4518.73	3471.31	5120.83	2552.14	3138.02
P97333	P97333	NRP1_MOUSE	Nrp1	Neuropilin-1	22678.6	32969	30487.3	22805.4	23899	22345.1
P40240	P40240	CD9_MOUSE	Cd9	CD9 antigen	82923.2	6212.85	55862.8	49187.4	1016.37	66131.8	144999
Q91V41	Q91V41	RAB14_MOUSE	Rab14	Ras-related protein Rab-14	41636.7	56485.1	60522.5	45979.4	22573.1	58772.6
Q9Z1R3	Q9Z1R3	APOM_MOUSE	Apom	Apolipoprotein M	68327.2	61994.3	57513.8	71742.1	9156	69925.5
Q9D0M1	Q9D0M1;B1AT83;B1AT82	KPRA_MOUSE	Prpsap1	Phosphoribosyl pyrophosphate synthase-associated protein 1	2703.22	2093.87	2177.64	3049.61	214.888	2339.67
P63056	P63056	NOE3_MOUSE	Olfm3	Noelin-3	1247.97	2705.84	6074.41	NA	4535.07	843.008
O55226	O55226	CHAD_MOUSE	Chad	Chondroadherin	1214.76	1310.05	417.108	1260.88	595.631	512.204
P34022	P34022	RANG_MOUSE	Ranbp1	Ran-specific GTPase-activating protein	12275.1	13724.9	12830.9	11076.2	7201.78	12999.2
P47791	P47791	GSHR_MOUSE	Gsr	Glutathione reductase, mitochondrial	889.785	1905.08	1798.27	1768.71	698.064	NA
Q9QZM4	Q9QZM4	TR10B_MOUSE	Tnfrsf10b	Tumor necrosis factor receptor superfamily member 10B	4083.76	11641.5	4169.37	3395.67	7477.04	5185.34
P63038	P63038	CH60_MOUSE	Hspd1	60 kDa heat shock protein, mitochondrial	2610.47	2474.98	2935.32	2824.63	1529.35	2121.41
Q921C1	Q921C1	CXG3_MOUSE	Gjc3	Gap junction gamma-3 protein	5584.04	7274.47	17766.3	3779.49	NA	12707.6
Q9R0G6;Q9Z1T2	Q9Z1T2;Q9R0G6;A0A1D5RMB8	COMP_MOUSE;TSP4_MOUSE	Comp;Thbs4	Cartilage oligomeric matrix protein	51403.1	188404	195796	94091.8	196648	61565.6
Q9D0R2	Q8BLY2;Q9D0R2	SYTC_MOUSE	Tars1	Threonine--tRNA ligase 1, cytoplasmic	6618.4	7408.06	4276.17	7608.96	2414.56	4785.83
O08688	O08688	CAN5_MOUSE	Capn5	Calpain-5	24935.1	25269.9	17161.5	21038.8	16531.1	16948.5
Q8BJF9	Q8BJF9;A0A338P7L8	CHM2B_MOUSE	Chmp2b	Charged multivesicular body protein 2b	27998.6	38899.5	38955.4	24135.1	31739.3	29798.4
Q9DBF1	Q9DBF1;G3UYR8	AL7A1_MOUSE	Aldh7a1	Alpha-aminoadipic semialdehyde dehydrogenase	5343.05	2827.9	3173.42	4411.37	3362.5	1411.3
Q8VDD5	Q8VDD5	MYH9_MOUSE	Myh9	Myosin-9	32688.9	18394.9	42936.4	32663.4	11120.7	32343.3
P61971	P61971	NTF2_MOUSE	Nutf2	Nuclear transport factor 2	18125	11886.5	9463.94	12330	13436.5	6241.2
Q9JLB9	Q9JLB9;F7A4R2	NECT3_MOUSE	Nectin3	Nectin-3	3067.83	NA	3639.11	1978.01	NA	3461.6
O35945;P24549	P24549;O35945	AL1A1_MOUSE;AL1A7_MOUSE	Aldh1a1;Aldh1a7	Aldehyde dehydrogenase, cytosolic 1	16403.3	6900.97	10308.5	14577.2	NA	3608.57
Q9D1R9	Q9D1R9;A0A0G2JEY6;A0A0G2JGY8	RL34_MOUSE	Rpl34	60S ribosomal protein L34	10759.8	26659.6	39940.7	30818.2	21264.4	10709.1
D3YYR5;D3Z5U5;Q9Z256;Q9Z257	Q9Z256;D3Z5U5;Q9Z257;D3YYR5	D3YYR5_MOUSE;D3Z5U5_MOUSE;Q9Z256_MOUSE;Q9Z257_MOUSE	P2rx4	ATP receptor	4342.92	6778.61	9630.63	4241.97	NA	7000.2
Q3UCV8	Q3UCV8	OTUL_MOUSE	Otulin	Ubiquitin thioesterase otulin	703.452	157.973	NA	350.083	NA	NA
Q9Z2Y8	Q9Z2Y8;Q6P8V7;A0A1B0GSP5;Q80ZV3;A0A1B0GRP7	PLPHP_MOUSE	Plpbp	Pyridoxal phosphate homeostasis protein	1777.38	845.999	527.04	1158.12	NA	549.073
Q8BH35	Q8BH35	CO8B_MOUSE	C8b	Complement component C8 beta chain	64916.4	29923.2	65591.8	43499.2	NA	NA
Q9DB20	Q9DB20;A0A338P776;F7D3P8	ATPO_MOUSE	Atp5po	ATP synthase subunit O, mitochondrial	796.75	994.411	1433.73	NA	874.652	NA
P97348	P97348;A0A494B9H3;G3X9Y4	RHOD_MOUSE	Rhod	Rho-related GTP-binding protein RhoD	10947.8	41446.5	35680	14759.4	49254.3	7757.47
P62715;P63330	P63330;P62715	PP2AA_MOUSE;PP2AB_MOUSE	Ppp2ca;Ppp2cb	Serine/threonine-protein phosphatase 2A catalytic subunit beta isoform	25488.3	11133.5	8191	18353.6	2459.77	15731.5
P04184	P04184	KITH_MOUSE	Tk1	Thymidine kinase, cytosolic	2954	5084.71	2282.84	2683.07	1831.7	3903.01
P84104;Q8BL97	P84104;Q8BL97;A0A3Q4L335;A0A3Q4L393;A0A3Q4EH04	SRSF3_MOUSE;SRSF7_MOUSE	Srsf3;Srsf7	Serine/arginine-rich splicing factor 3	1879.5	NA	1539.51	1157.39	NA	1632.69
Q6X893	Q6X893;A2AMH3;A2AMH4;A2AMH5	CTL1_MOUSE	Slc44a1	Choline transporter-like protein 1	13215.7	7215.4	11369.9	8655.56	NA	NA
P29268	P29268	CCN2_MOUSE	Ccn2	CCN family member 2	4194.48	15087.5	7092.69	7367.7	9018.63	5150.34
Q8CH72	Q8CH72	TRI32_MOUSE	Trim32	E3 ubiquitin-protein ligase TRIM32	10662.6	14434.4	10179.2	9643.14	7327.94	11849.1
Q9EQP2;Q9QXY6;Q9WVK4	Q9EQP2;Q9WVK4;Q9QXY6	EHD1_MOUSE;EHD3_MOUSE;EHD4_MOUSE	Ehd1;Ehd3;Ehd4	EH domain-containing protein 4	39171.3	27326.2	24969.4	25628	17479.8	31679.1
O08602;O08603;O08604;Q9CZQ6;Q9JI58	O08603;Q9JI58;O08602;O08604;Q9CZQ6	RAE1A_MOUSE;RAE1B_MOUSE;RAE1C_MOUSE;RAE1D_MOUSE;RAE1E_MOUSE	Raet1a;Raet1b;Raet1c;Raet1d;Raet1e	Retinoic acid early-inducible protein 1-alpha	658.252	1633.95	228.3	552.215	290.504	1220.15
Q8CGC7	Q8CGC7	SYEP_MOUSE	Eprs1	Bifunctional glutamate/proline--tRNA ligase	29230.5	18459.5	20246.2	29492.6	9565.99	16569.4
P42669	P42669	PURA_MOUSE	Pura	Transcriptional activator protein Pur-alpha	2642.38	3850.16	2564.32	2466.71	2477.5	NA
Q9JHH6	Q9JHH6	CBPB2_MOUSE	Cpb2	Carboxypeptidase B2	19557.9	4259.56	1508.88	5826.94	8475.83	6466.48
Q8VDV8	Q8VDV8	MITD1_MOUSE	Mitd1	MIT domain-containing protein 1	16761.5	20655	11547.6	13524.8	NA	13266.7
P28659	P28659;A0A0R4J0T5	CELF1_MOUSE	Celf1	CUGBP Elav-like family member 1	5388.71	7751.03	7085.05	8045.23	2853.09	5702.64
B2RQ71;B7ZMZ7	B7ZMZ7;B2RQ71;E9PWR4	B2RQ71_MOUSE;B7ZMZ7_MOUSE	Dip2c	Dip2c protein	22783.3	25971	10694.8	17450.3	14352	17017.4
P31324	P31324	KAP3_MOUSE	Prkar2b	cAMP-dependent protein kinase type II-beta regulatory subunit	1829.32	1453.39	631.391	1684.64	767.191	762.505
Q8C4X2	Q8C4X2;A0A494BAP2	KC1G3_MOUSE	Csnk1g3	Casein kinase I isoform gamma-3	2870.02	4104.07	2790.93	3606.98	2176.4	2242.65
Q61288	Q61288	ACVL1_MOUSE	Acvrl1	Serine/threonine-protein kinase receptor R3	7671.48	11177.8	7498.99	7658.66	8418.08	5583.93
P20152	P20152;A0A0A6YWC8	VIME_MOUSE	Vim	Vimentin	60515.6	43601.7	79970.3	68353.8	23693	59332.3
Q9CZ44	Q9CZ44;A2AT02	NSF1C_MOUSE	Nsfl1c	NSFL1 cofactor p47	2946.62	1782.7	3178.54	3143.74	879.648	2482.37
Q5F2E8	Q5F2E8	TAOK1_MOUSE	Taok1	Serine/threonine-protein kinase TAO1	6488.09	3745.94	3942.04	4767.92	1594.88	5302.62
Q811J3	Q811J3	IREB2_MOUSE	Ireb2	Iron-responsive element-binding protein 2	1574.45	1031.05	NA	949.589	1134.19	1132.41
Q8C145	Q8C145;D3Z7N4	S39A6_MOUSE	Slc39a6	Zinc transporter ZIP6	3428.18	4095.94	2061.19	2083.41	2480.13	3325.58
P80316	P80316	TCPE_MOUSE	Cct5	T-complex protein 1 subunit epsilon	33667	20852.5	17674.3	29364.1	11028	19034.2
P67778	P67778;Q5SQG5	PHB_MOUSE	Phb	Prohibitin	1110.69	3183.43	4567.15	2922.28	2787.71	1587.57
P27659	P27659;A0A087WQK0	RL3_MOUSE	Rpl3	60S ribosomal protein L3	59234.9	31815.9	41824.7	47861.9	22041.5	39533.1
Q7M6Y3	Q7M6Y3;A0A140LHG9	PICAL_MOUSE	Picalm	Phosphatidylinositol-binding clathrin assembly protein	10655.9	10783.6	5959.77	9734.29	3285.72	9555.59
Q8K1A6	Q8K1A6;E9PX94	C2D1A_MOUSE	Cc2d1a	Coiled-coil and C2 domain-containing protein 1A	13187.7	8637.58	12715.4	9686.61	11141.2	7653.69
Q8BX17	Q8BX17;E9PUU4;A2AFQ9	GEMI5_MOUSE	Gemin5	Gem-associated protein 5	103966	97653.9	96986.4	99004.6	77342.9	70322.8
Q9CQ88	Q9CQ88	TSN31_MOUSE	Tspan31	Tetraspanin-31	9205.97	31175.3	12845.2	10808	13752	19426.4
Q8R3L5	Q8R3L5;D3YXA8	SO3A1_MOUSE	Slco3a1	Solute carrier organic anion transporter family member 3A1	5138.81	6631.32	5340.45	6964.55	1762.97	5427.27
Q61553	Q61553;A0A0G2JDU7	FSCN1_MOUSE	Fscn1	Fascin	14762.9	12036.7	7943.84	14085.8	10382.3	4282.38
Q9QXZ0	Q9QXZ0;Q91ZU6;E9Q9X1;S4R1Y6;F7ACR9;B1ARU4;F6RCJ3;F6Q750;A0A571BGC6;S4R2A8;A0A087WSP0;A0A0A0MQA6;S4R2C6;A0A571BF93;E9PVY8;S4R1P5;E9QNP1;F6YKN8;E9QA63;F6RL59	MACF1_MOUSE	Macf1	Microtubule-actin cross-linking factor 1	936.021	NA	1133.31	604.003	NA	1109.24
Q9R1C7	Q9R1C7;A0A1B0GRU8;A0A6Q6PUT5	PR40A_MOUSE	Prpf40a	Pre-mRNA-processing factor 40 homolog A	3526.06	1491.14	4612.51	2879.2	NA	2436.03
Q9CR60	Q9CR60	GOT1B_MOUSE	Golt1b	Vesicle transport protein GOT1B	1132.36	804.658	1114.52	1197.89	NA	488.02
Q923G2	Q923G2;A0A338P6B4;A0A338P6I2	RPAB3_MOUSE	Polr2h	DNA-directed RNA polymerases I, II, and III subunit RPABC3	1102.83	1559.85	NA	1266.67	NA	940.89
Q9CQ10	Q9CQ10;A0A0N4SV76;A0A0N4SUX9	CHMP3_MOUSE	Chmp3	Charged multivesicular body protein 3	25151.8	42583.5	26446.8	18461.8	26051.9	33574.6
Q9QZJ6	Q9QZJ6;D3Z4D7;D3Z3L7;F8WJ99	MFAP5_MOUSE	Mfap5	Microfibrillar-associated protein 5	5763.79	676.958	783.37	1996.57	NA	NA
P28571	P28571;E9Q3Z2;E9QA02;E9Q3V0;E9Q517	SC6A9_MOUSE	Slc6a9	Sodium- and chloride-dependent glycine transporter 1	2896.76	3803.86	1088.03	2153.46	NA	NA
P63280	P63280;Q8CFZ0;G3UYP0	UBC9_MOUSE	Ube2i	SUMO-conjugating enzyme UBC9	1242.47	NA	978.109	1493.08	NA	351.529
Q64695	Q64695;A2AUV5	EPCR_MOUSE	Procr	Endothelial protein C receptor	6799.79	6755.47	5473.95	6166.07	1690.52	7962.4
Q04736	Q04736;A0A0J9YUV2	YES_MOUSE	Yes1	Tyrosine-protein kinase Yes	9239.21	13024.7	10074	8582.94	9094.75	9205.25
Z4YKV1	Z4YKV1	Z4YKV1_MOUSE	Gnas	Guanine nucleotide-binding protein G(s) subunit alpha isoforms short	916.011	1469.33	1361.24	837.412	NA	1239.36
Q62159;Q9QUI0	Q62159;Q9QUI0;A0A0A6YXF6;Q9CR99;A0A0A6YWJ1;A0A0G2JEP8;H3BL56	RHOA_MOUSE;RHOC_MOUSE	Rhoa;Rhoc	Rho-related GTP-binding protein RhoC	88758.2	52045.1	60894.1	62862.7	55659.7	49195.4
P04104	P04104	K2C1_MOUSE	Krt1	Keratin, type II cytoskeletal 1	32062.6	102313	125632	96188.9	4135.64	115894
Q5F2E8;Q8BYC6	Q5F2E8;Q8BYC6;A0A0R4J1T3;F6RXB5	TAOK1_MOUSE;TAOK3_MOUSE	Taok1;Taok3	Serine/threonine-protein kinase TAO1	5196.11	14910.7	9155.08	9938.35	8522.82	5877.95
P20152;P50446;Q3UV17;Q922U2;Q99M73	Q9ERE2;Q8VED5;Q9Z2T6;P11679;Q6IMF0;Q922U2;Q9DCV7;Q3UV17;P50446;P03995;P97861;Q99M73;Q8BGZ7;P07744;Q9Z331;P20152;A2AKJ2;Q3UV11;E9Q1Z0;E9Q1Y9;E9Q0F0;A0A0A6YWC8	K22O_MOUSE;K2C5_MOUSE;K2C6A_MOUSE;KRT84_MOUSE;VIME_MOUSE	Krt5;Krt6a;Krt76;Krt84;Vim	Vimentin	17278.9	99468.2	42811.5	55399.3	47111.9	30211.2
Q922T2	Q922T2;A0A0R4J1C7	MFAP3_MOUSE	Mfap3	Microfibril-associated glycoprotein 3	25900.9	50478.2	60302.7	28059.7	51308.6	34359
Q8R4D1	Q8R4D1;A2A464	SL9A8_MOUSE	Slc9a8	Sodium/hydrogen exchanger 8	3040.31	7874.29	8719.81	7737.9	2123.89	6475.73
Q9WVA4	Q9WVA4	TAGL2_MOUSE	Tagln2	Transgelin-2	9219.11	5230.91	6587.33	7233.65	5019.31	5256.35
Q9JHK5	Q9JHK5;Q8CAG6	PLEK_MOUSE	Plek	Pleckstrin	11226.4	NA	6524.03	10298.6	NA	4475.65
P09411	P09411;S4R2M7	PGK1_MOUSE	Pgk1	Phosphoglycerate kinase 1	74729	58920.3	71797.9	85070.9	23771.7	62385.5
Q8K2Q7	Q8K2Q7	BROX_MOUSE	Brox	BRO1 domain-containing protein BROX	97742.6	51858.3	61890.4	54346.6	49712.1	72207.8
Q9Z2X8	Q9Z2X8;A0A1L1SS10	KEAP1_MOUSE	Keap1	Kelch-like ECH-associated protein 1	946.474	2467.34	2109.15	968.02	2491.39	1145.48
Q6PHU5	Q6PHU5	SORT_MOUSE	Sort1	Sortilin	13398.1	18713	27060	16193.2	8387.35	24763.7
Q3UQ44;Q9JKF1	Q3UQ44;Q9JKF1;Q3UQP1;F8VQ29	IQGA1_MOUSE;IQGA2_MOUSE	Iqgap1;Iqgap2	Ras GTPase-activating-like protein IQGAP2	16533.7	22854.4	16550.3	18330.1	14951	13378
Q8BL97	Q8BL97;A0A3Q4L335;A0A3Q4L393;A0A3Q4EH04	SRSF7_MOUSE	Srsf7	Serine/arginine-rich splicing factor 7	11107.1	8029.18	11751.8	10705.3	9156.74	5919.73
P15864;P43274	P43275;P43277;P15864;P43274	H12_MOUSE;H14_MOUSE	H1-2;H1-4	Histone H1.2	10699.1	32817.1	18285.9	8102.72	28118.6	15420
Q9DAK9	Q9DAK9	PHP14_MOUSE	Phpt1	14 kDa phosphohistidine phosphatase	1496.08	422.955	1337.44	907.503	NA	NA
Q9D1L9	Q9D1L9;G3UW70	LTOR5_MOUSE	Lamtor5	Ragulator complex protein LAMTOR5	2850.92	1904.74	3038.96	2574.26	NA	1771.08
O88384	O88384;Q91XH6;F6UHS3	VTI1B_MOUSE	Vti1b	Vesicle transport through interaction with t-SNAREs homolog 1B	8497.74	7970.09	9435.27	3880.03	14137.6	3646.42
D3Y273;E3UVT8;F8VQC9;H6WZF5;I1VGT4	Q5DTL9;D3Y273;I1VGT4;F8VQC9;H6WZF5;J9RV59;E3UVT8;A0A286YD46;A0A286YDK8	D3Y273_MOUSE;E3UVT8_MOUSE;F8VQC9_MOUSE;H6WZF5_MOUSE;I1VGT4_MOUSE	Slc4a7	Anion exchange protein	5127.32	3126.99	8263.82	3953.83	1451.16	8412.49
Q8C7V3	Q8C7V3	UTP15_MOUSE	Utp15	U3 small nucleolar RNA-associated protein 15 homolog	16234.1	NA	NA	21291.6	NA	5869.45
A0A1L1SSV8	A0A1L1SSV8	A0A1L1SSV8_MOUSE	Taok2	Serine/threonine-protein kinase TAO2 (Fragment)	979.089	1544.81	5948.99	4374.13	NA	354.505
Q6NZR5	Q6NZR5	Q6NZR5_MOUSE	Skiv2l	Superkiller viralicidic activity 2-like (S. cerevisiae)	921.51	NA	2999.4	1662.86	NA	1621.78
Q9DCG2	Q9DCG2	CD302_MOUSE	Cd302	CD302 antigen	699.258	3445.22	5140.52	2811.4	1448.63	3526.17
A0A0A6YY83;E9Q2S0	E9Q2S0;A2RS43;A0A0A6YY83	A0A0A6YY83_MOUSE;E9Q2S0_MOUSE	Pcdh7	Protocadherin 7	3200.82	3245.51	2033.44	1929.55	2502.36	2681.97
Q80V70	Q80V70;F6YCL7;A0A0A0MQ83;B1ASH4	MEGF6_MOUSE	Megf6	Multiple epidermal growth factor-like domains protein 6	4478.47	8757.97	5652.5	5883.8	7772.86	2193.82
Q9R1Q9	Q9R1Q9;Q3TKX1	VAS1_MOUSE	Atp6ap1	V-type proton ATPase subunit S1	1337.98	2556.45	1381.56	871.931	NA	2079.64
P09055	P09055	ITB1_MOUSE	Itgb1	Integrin beta-1	139309	188720	229073	205071	119390	143149
Q7TMB8	Q7TMB8;A0A0U1RQ05;A0A0R4J119	CYFP1_MOUSE	Cyfip1	Cytoplasmic FMR1-interacting protein 1	15967	8382.21	6812.82	9821.98	1023.6	15328
Q99LX0	Q99LX0;A2A815;A2A813	PARK7_MOUSE	Park7	Parkinson disease protein 7 homolog	6481.44	10983	8345.28	5822.32	6966.39	8895.24
P13707	P13707;E0CXN5	GPDA_MOUSE	Gpd1	Glycerol-3-phosphate dehydrogenase [NAD(+)], cytoplasmic	4291.42	4071.55	4840.39	4979.6	NA	2420.3
Q9Z2W0	Q9Z2W0;Q3TVK3;Q8BPW9	DNPEP_MOUSE	Dnpep	Aspartyl aminopeptidase	2798.7	1961.1	1785.56	3729.88	721.42	1053.09
Q61749	Q61749;A0A0J9YUY0;D3Z780	EI2BD_MOUSE	Eif2b4	Translation initiation factor eIF-2B subunit delta	3296.64	636.898	703.661	1963.32	NA	638.855
O35350	O35350;A0A494BBB0	CAN1_MOUSE	Capn1	Calpain-1 catalytic subunit	1248.47	720.417	NA	1352.86	NA	305.078
Q64523;Q6GSS7	Q6GSS7;Q64523	H2A2A_MOUSE;H2A2C_MOUSE	H2ac20;Hist2h2aa1	Histone H2A type 2-C	11540.2	18212.8	8282.22	9888.66	496.845	21643.1
Q60634	Q60634;Q5SS83	FLOT2_MOUSE	Flot2	Flotillin-2	37590.2	51760.1	49793.4	56005.1	21369.2	39830.3
Q6PDQ2	A2A8L1;Q6PDQ2;F6WR45;E9Q614;E9PYL1;E9QAS4;F7C528;B1AR17;E9PYU4;E9QAS5	CHD4_MOUSE	Chd4	Chromodomain-helicase-DNA-binding protein 4	1706.35	NA	860.812	1081.5	NA	NA
Q9DAW9	Q9DAW9;A0A0G2JFI6;A0A0G2JDV8	CNN3_MOUSE	Cnn3	Calponin-3	11119.7	7536.21	12990.6	13370.4	3258.94	10064
Q9CR23	Q9CR23	TMEM9_MOUSE	Tmem9	Proton-transporting V-type ATPase complex assembly regulator TMEM9	3636.57	936.203	10374.8	1219.16	NA	7187.87
Q8K4G1	Q8K4G1;E9QPS5;D3Z598	LTBP4_MOUSE	Ltbp4	Latent-transforming growth factor beta-binding protein 4	4923.21	378.57	8291.85	3605.24	NA	4047.4
Q9JMG1	Q9JMG1	EDF1_MOUSE	Edf1	Endothelial differentiation-related factor 1	1717.56	125.977	2525.3	827.417	NA	1632.19
O70258	O70258;F8WGM3;F6R6P2;E9PX46;F6WKE4;D3Z572	SGCE_MOUSE	Sgce	Epsilon-sarcoglycan	28293.2	55766.1	91818.4	57409.8	2442.83	88783.6
Q9CWZ7	Q9CWZ7;A0A494BAE3;D3Z4B2;A0A494BA20	SNAG_MOUSE	Napg	Gamma-soluble NSF attachment protein	3912.82	4892.28	2207.77	3420.93	4105.88	1782.03
Q91YS8	Q91YS8	KCC1A_MOUSE	Camk1	Calcium/calmodulin-dependent protein kinase type 1	1174.05	750.736	2430.59	316.94	NA	2137.89
Q80TL7	Q80TL7;B9EKJ3	MON2_MOUSE	Mon2	Protein MON2 homolog	1953.41	1416.3	NA	1497.6	NA	1351.42
P08556;P32883	P08556;P32883;Q9D091;A0A0G2JE25;A0A0G2JGP4	RASK_MOUSE;RASN_MOUSE	Kras;Nras	GTPase NRas	57436	117055	110607	67575	127138	46580.1
Q9QUK6	Q9QUK6	TLR4_MOUSE	Tlr4	Toll-like receptor 4	555.561	650.408	NA	410.02	459.457	662.801
O70503	O70503	DHB12_MOUSE	Hsd17b12	Very-long-chain 3-oxoacyl-CoA reductase	8580.36	12007.2	8763.54	11919.8	4082.81	8871.54
Q91VU0	Q91VU0;G5E911;G3X9I1	FAM3C_MOUSE	Fam3c	Protein FAM3C	2770.54	5078.55	3922.73	3860.12	2168.24	3960.37
Q9D0E1	Q9D0E1;A0A3Q4EH91;B8JK32;B8JK33	HNRPM_MOUSE	Hnrnpm	Heterogeneous nuclear ribonucleoprotein M	6258.34	3926.17	3949.39	6276.4	2864.43	2861.94
Q3UHX2	Q3UHX2	HAP28_MOUSE	Pdap1	28 kDa heat- and acid-stable phosphoprotein	4863.68	NA	4954.28	4325.52	NA	4016.17
P97927	P97927	LAMA4_MOUSE	Lama4	Laminin subunit alpha-4	24498.3	21037.8	25146.1	22786.8	22705.4	14564.8
Q8K0D0	Q8K0D0	CDK17_MOUSE	Cdk17	Cyclin-dependent kinase 17	1916.03	2190.24	1167.33	2108.32	1004.88	1368.08
Q9EPL0	Q9EPL0;F2Z436	XYLT2_MOUSE	Xylt2	Xylosyltransferase 2	3554.31	4306.7	2553.57	2845.19	3645.25	2365.48
Q6P5E4	Q6P5E4;G3UY73	UGGG1_MOUSE	Uggt1	UDP-glucose:glycoprotein glucosyltransferase 1	1775.48	432.222	1923	1059.1	NA	1283.04
A0A1W2P7B8;Q9CZB2	Q9CZB2;A0A1W2P7B8	A0A1W2P7B8_MOUSE;Q9CZB2_MOUSE	Pmel	Melanocyte protein PMEL (Fragment)	35022.5	162798	89927.7	101782	125824	17203.8
P97315	P97315	CSRP1_MOUSE	Csrp1	Cysteine and glycine-rich protein 1	25833.9	32863.7	36753.8	37483.3	10533.2	33196.2
Q9R1P1	Q9R1P1	PSB3_MOUSE	Psmb3	Proteasome subunit beta type-3	8437.03	6436.17	4780.89	10534.9	2050.08	4149.06
Q9D662	Q9D662	SC23B_MOUSE	Sec23b	Protein transport protein Sec23B	3902.53	2095.74	3066.8	1956.65	3492.96	2272.64
Q3V009	Q3V009	TMED1_MOUSE	Tmed1	Transmembrane emp24 domain-containing protein 1	1942.2	3169.23	1011.97	1609.19	1520.83	2086.8
P08556;Q61411	P08556;Q61411;Q9D091;A0A0G2JE25;A0A0G2JGP4	RASH_MOUSE;RASN_MOUSE	Hras;Nras	GTPase NRas	15397.2	6797.21	9186.52	11354.1	3301.68	12092.2
P23116	P23116	EIF3A_MOUSE	Eif3a	Eukaryotic translation initiation factor 3 subunit A	15615	9575.94	10448.4	15223.5	6234.62	8921.01
Q61235	Q61235;B7ZNU9	SNTB2_MOUSE	Sntb2	Beta-2-syntrophin	7058.91	4353.83	3750.05	4152.11	5424.82	3356.91
Q9R1T4	Q9R1T4;A2A3W1	SEPT6_MOUSE	Septin6	Septin-6	999.366	949.158	1283.82	1326.44	NA	512.987
Q8BVL3	Q8BVL3	SNX17_MOUSE	Snx17	Sorting nexin-17	3461.61	3898.76	3956.64	3221.38	NA	NA
P32883	P32883	RASK_MOUSE	Kras	GTPase KRas	5111.06	1718.63	2207.77	NA	NA	2573.84
M0QWP1	Z4YK85;M0QWP1	M0QWP1_MOUSE	Agrn	Agrin	4529.53	722.983	1052.2	1937.95	NA	1653.75
P97351	P97351	RS3A_MOUSE	Rps3a	40S ribosomal protein S3a	50291	34780.5	57905.7	49103.8	28383.5	44729.1
Q8K3G9	Q8K3G9	DP13B_MOUSE	Appl2	DCC-interacting protein 13-beta	1442.27	1950	1082.89	1610.41	922.632	1292.34
Q78PG9	Q78PG9	CCD25_MOUSE	Ccdc25	Coiled-coil domain-containing protein 25	1551.19	339.982	493.873	679.836	NA	NA
P14685	P14685	PSMD3_MOUSE	Psmd3	26S proteasome non-ATPase regulatory subunit 3	16294.5	7269	6666.52	14192.4	2938.95	8726.94
P83510;P97820	P83510;Q91YE5;P97820;B2RUE8;A0A0A6YWR8;A0A0A6YW53;F8VPM0;B9EKN8;B2RQ80;A0A0A6YWM8;B7ZNR9;E0CZD7;E0CZF8;F8VPL5;E9Q374;E9PUL9;E9PVG7;E0CY98;A0A5F8MPQ7;A0A1W2P6X9;E0CXD6	M4K4_MOUSE;TNIK_MOUSE	Map4k4;Tnik	Traf2 and NCK-interacting protein kinase	1937.99	NA	1128.24	NA	NA	1311.57
S4R2K0	S4R2K0	S4R2K0_MOUSE	Pdf	Peptide deformylase	2123.22	4201.02	2670.79	997.971	5542.83	1155.27
Q9CR26	Q9CR26	VTA1_MOUSE	Vta1	Vacuolar protein sorting-associated protein VTA1 homolog	52632.8	53694.2	38667.2	39917.7	41838.1	42419.1
P51150	P51150;A0A0N4SVG9;A0A0N4SVR6	RAB7A_MOUSE	Rab7a	Ras-related protein Rab-7a	188375	356059	337624	239217	327749	188545
Q01339	Q01339	APOH_MOUSE	Apoh	Beta-2-glycoprotein 1	28182.2	25708.9	19661.7	22639.2	14150.3	26240
Q8BT60;Q8C166	Q8C166;Q8BT60;E9Q806;B7ZCP7;B7ZCP4;B7ZCP6;V9GWY2;B7ZCP8;V9GX86;A3KGK7;B7ZCP5	CPNE1_MOUSE;CPNE3_MOUSE	Cpne1;Cpne3	Copine-3	5005.18	2744.49	4394.68	3947.58	2960.31	3512.22
A0A087WPL5;E9QNN1	E9QNN1;A0A087WPL5	A0A087WPL5_MOUSE;E9QNN1_MOUSE	Dhx9	RNA helicase	2096.77	NA	1134.22	1386.35	NA	NA
P14733	P14733	LMNB1_MOUSE	Lmnb1	Lamin-B1	806.969	707.783	NA	372.519	NA	928.542
Q810U4	Q810U4;A0A1W2P7Y9	NRCAM_MOUSE	Nrcam	Neuronal cell adhesion molecule	4775.85	7082.96	6682.88	7511.09	3328.73	5107.57
Q9QZC7	Q9QZC7;D3Z3L2	PKHB2_MOUSE	Plekhb2	Pleckstrin homology domain-containing family B member 2	70136.8	48052.5	58571.2	43321.3	NA	58034.1
Q640N1	Q640N1	AEBP1_MOUSE	Aebp1	Adipocyte enhancer-binding protein 1	29095.6	40980.3	32499.6	39541.4	30205.8	18532.1
Q64374	Q64374	RGN_MOUSE	Rgn	Regucalcin	128395	42511.5	83398.4	69541	118237	31085.8
Q6NVF9	Q6NVF9;H3BJ30;H3BKW0;H3BJW3	CPSF6_MOUSE	Cpsf6	Cleavage and polyadenylation specificity factor subunit 6	3079.28	6940	6124.98	6719.67	1769.84	5406.94
Q6A051	Q6A051	ATRN1_MOUSE	Atrnl1	Attractin-like protein 1	2030.47	5227.22	2466.5	4481.77	1165.43	2723.17
Q99KR8	Q99KR8;D3YVV4	FUCO2_MOUSE	Fuca2	Plasma alpha-L-fucosidase	2392.71	976.275	NA	1085.49	NA	1816.4
Q60675	Q60675	LAMA2_MOUSE	Lama2	Laminin subunit alpha-2	4207.53	3625.87	2023.96	2437.74	4272.45	1780.54
J3QN89;Q3TJ22	Q3TJ22;J3QN89	J3QN89_MOUSE;Q3TJ22_MOUSE	Aamp	Angio-associated migratory protein	4858.32	2453.94	2584.12	2715.65	3272.87	2542.05
F6VJC5;Q80ZX0	Q80ZX0;F6VJC5	F6VJC5_MOUSE;Q80ZX0_MOUSE	Sec24b	Sec24-related gene family, member B (S. cerevisiae) (Fragment)	1631.8	1029.55	650.814	NA	NA	951.772
O89026	O89026;A0A338P6F7;G5E843	ROBO1_MOUSE	Robo1	Roundabout homolog 1	1806.78	4352.44	1485.24	1729.91	2941.68	1918.51
Q60767	Q60767;A2AW86	LY75_MOUSE	Ly75	Lymphocyte antigen 75	2487.8	1921.85	1087.49	1314.85	1125.93	2298.96
B2RQS1	B2RQS1	B2RQS1_MOUSE	Strn3	Striatin-3	1217.32	606.096	100.042	662.026	NA	444.007
Q8BHB4	Q8BHB4	WDR3_MOUSE	Wdr3	WD repeat-containing protein 3	2041.97	793.878	1078.22	1636.68	NA	615.709
P35550	P35550;A0A140LIR6	FBRL_MOUSE	Fbl	rRNA 2'-O-methyltransferase fibrillarin	6814.54	2170.72	6630.44	6647.76	1855.89	4980.98
Q9JI10;Q9JI11	Q9JI10;Q9JI11;A0A2I3BQE0	STK3_MOUSE;STK4_MOUSE	Stk3;Stk4	Serine/threonine-protein kinase 3	3100.22	3102	2174.92	4265.46	987.895	1982.53
Q9WTP2	Q9WTP2	SPY4_MOUSE	Spry4	Protein sprouty homolog 4	3168.97	4459.81	6957.79	4781.38	5356.56	2467.46
Q99J45	Q99J45;A0A0J9YUQ4	NRBP_MOUSE	Nrbp1	Nuclear receptor-binding protein	962.315	NA	NA	685.785	NA	978.233
P63028	P63028;D3YU75	TCTP_MOUSE	Tpt1	Translationally-controlled tumor protein	14687.4	18076.7	16984.6	16996.9	3534.31	22485.5
P60335	P60335	PCBP1_MOUSE	Pcbp1	Poly(rC)-binding protein 1	84382.1	115111	138369	98028.5	116929	77251.1
P17156	P17156	HSP72_MOUSE	Hspa2	Heat shock-related 70 kDa protein 2	10574.5	7071.53	9764.29	7836.95	8378.95	7500.51
Q8C5H8	Q8C5H8;A0A087WQI8;Z4YK42	NAKD2_MOUSE	Nadk2	NAD kinase 2, mitochondrial	1415.18	NA	2896.49	3056.3	675.616	NA
Q9CYN2	Q9CYN2;A0A140LHR3;A0A140LHG8;A0A140LJG6;A0A140LJ01	SPCS2_MOUSE	Spcs2	Signal peptidase complex subunit 2	3450.35	NA	2151.04	2424.35	NA	NA
P18572	P18572;K3W4Q8;J3QP71	BASI_MOUSE	Bsg	Basigin	148929	116329	136315	157961	26026.4	163658
P61161	P61161	ARP2_MOUSE	Actr2	Actin-related protein 2	44031.4	30723.9	29895.9	42801.1	22560.3	25239.4
Q69ZN7	Q69ZN7;A0A286YDF5;E9Q390	MYOF_MOUSE	Myof	Myoferlin	7190.33	11296.3	9261.23	4558.75	11157.9	8319.16
Q9CQ22	Q9CQ22	LTOR1_MOUSE	Lamtor1	Ragulator complex protein LAMTOR1	12285.2	43971	43254.6	23826.4	39008.1	23431.8
Q9CR47	Q9CR47;A0A286YCS8	NSA2_MOUSE	Nsa2	Ribosome biogenesis protein NSA2 homolog	1134.45	4649.48	2430.1	2278.1	2469.28	NA
O35206	O35206;A2AJY2;A2AJY5;A2AJY7	COFA1_MOUSE	Col15a1	Collagen alpha-1(XV) chain	3081.57	2206.78	7498.74	3695.88	NA	NA
Q91W50	Q91W50;Q8JZN2;A0A0G2JF72	CSDE1_MOUSE	Csde1	Cold shock domain-containing protein E1	7301.26	4328.29	5600.21	7241.14	1854.62	5848.06
Q99L47	Q99L47;F8WJK8	F10A1_MOUSE	St13	Hsc70-interacting protein	59883.1	57630.4	27710.6	49541.5	18932.3	57568.5
Q64514	Q64514;Q05DJ9;A0A087WRC0	TPP2_MOUSE	Tpp2	Tripeptidyl-peptidase 2	22451.4	3852.31	3474.03	16739.8	3155.65	5962.38
Q61147	Q61147;G3X8Q5;G3X9T8;E9PZD8	CERU_MOUSE	Cp	Ceruloplasmin	3286.02	2622.76	1193.27	1104.15	2082.18	2981.23
Q9JIK5	Q9JIK5	DDX21_MOUSE	Ddx21	Nucleolar RNA helicase 2	7290.18	3973.37	5564.33	7791.36	3398.82	3430.93
P46061	P46061;A0A2R8VHK9	RAGP1_MOUSE	Rangap1	Ran GTPase-activating protein 1	2669.61	3630.36	2180.4	3281.94	996.462	3091.48
Q91ZR2	Q91ZR2;Q8C788	SNX18_MOUSE	Snx18	Sorting nexin-18	10629.2	2528.82	6072.25	4525.83	5925.82	6272.61
Q9Z0U1	Q9Z0U1;A0A3B2WCN9;A0A3B2WBH9	ZO2_MOUSE	Tjp2	Tight junction protein ZO-2	7721.9	8781.15	7851.26	7032.77	6897.21	7251.96
Q8BM72	Q8BM72	HSP13_MOUSE	Hspa13	Heat shock 70 kDa protein 13	5052.85	2997.19	575.518	2766.56	4185.64	553.373
P39876	P39876	TIMP3_MOUSE	Timp3	Metalloproteinase inhibitor 3	65370.6	55072.1	51670.3	22681.5	100894	26279.5
O35657	O35657	NEUR1_MOUSE	Neu1	Sialidase-1	7379.61	5185.32	6998.81	3238.77	5594.16	8201.72
P97807	P97807	FUMH_MOUSE	Fh	Fumarate hydratase, mitochondrial	1900.07	1556.9	1961.21	1647.38	1317.33	1753.54
Q60605	Q60605;A0A1W2P7Q9;A0A1W2P6F6;A0A1W2P6G5	MYL6_MOUSE	Myl6	Myosin light polypeptide 6	56801.1	49170.9	79595.6	54515.1	49962.1	57190.8
Q8BLR2	Q8BLR2;Q9D6C8;A0A1L1SSY1	CPNE4_MOUSE	Cpne4	Copine-4	1459.72	936.68	1083.44	1483.45	351.982	1196.3
P14148	P14148;F6XI62	RL7_MOUSE	Rpl7	60S ribosomal protein L7	89290.2	64427.2	67358.5	72054.5	51322.7	69231.5
Q6PGB6	Q6PGB6	NAA50_MOUSE	Naa50	N-alpha-acetyltransferase 50	1438.51	1530.08	677.804	2271.78	366.902	542.75
P14602	P14602;D3YZ06	HSPB1_MOUSE	Hspb1	Heat shock protein beta-1	17365.7	8335.77	8770.59	17976	6888.37	5219.38
P98064	P98064	MASP1_MOUSE	Masp1	Mannan-binding lectin serine protease 1	19664.5	45736.8	33736.6	27488.5	32287.2	26830.9
Q8BK62	Q8BK62;A0A0R4J086	OLFL3_MOUSE	Olfml3	Olfactomedin-like protein 3	5245.31	4605.15	1698.16	3363.06	NA	NA
P63213	P63213	GBG2_MOUSE	Gng2	Guanine nucleotide-binding protein G(I)/G(S)/G(O) subunit gamma-2	2429.07	5930.09	5210.99	4290.6	NA	3617.38
Q91XD6	Q91XD6	VPS36_MOUSE	Vps36	Vacuolar protein-sorting-associated protein 36	15826.3	19641.2	12105.9	19453.4	6402.1	15757
Q8K2Z4	Q8K2Z4;A0A0R4J0H7	CND1_MOUSE	Ncapd2	Condensin complex subunit 1	2047.89	1140.05	NA	1439.3	1185.54	1558.53
O35464	O35464;K3W4S5;D3YWM8	SEM6A_MOUSE	Sema6a	Semaphorin-6A	3954.64	5274.91	4935.6	3421.25	6437.14	2534.49
O55131;Q8C650	Q8C650;O55131;Q9DA97;S4R2P6;A0A0R4J233;E9Q1G8;A0A1W2P6J7;E9Q9F5	SEP10_MOUSE;SEPT7_MOUSE	Septin10;Septin7	Septin-7	7452.24	7671.74	5829.87	8836.12	5751.83	3752.05
Q80V62	Q80V62;A0A0N4SV29	FACD2_MOUSE	Fancd2	Fanconi anemia group D2 protein homolog	21381.7	2112.76	698.955	18415.7	2299.7	463.876
P28481	P28481	CO2A1_MOUSE	Col2a1	Collagen alpha-1(II) chain	10457.6	5198.12	12629.6	11977.1	3159.53	9645.01
P28740	P28740;F8VQ42;E0CZ72	KIF2A_MOUSE	Kif2a	Kinesin-like protein KIF2A	3434.85	2098.88	1868.24	2238.56	1509.93	2738.23
Q8JZZ7	Q8JZZ7;A0A0G2JG66;Q0P6A0;A0A0G2JGC2;A0A0G2JDE3;A0A0G2JDK6;A0A0G2JFV3;A0A0G2JDF4;A0A0G2JFF5;A0A0G2JGM8	AGRL2_MOUSE	Adgrl2	Adhesion G protein-coupled receptor L2	38601.4	44287.4	37679.4	38868.4	17018.3	49823
O35454	O35454;E9Q741;A2A7F6	CLCN6_MOUSE	Clcn6	Chloride transport protein 6	1283.21	NA	707.515	872.854	NA	NA
P53811	P53811;Q8JZZ5	PIPNB_MOUSE	Pitpnb	Phosphatidylinositol transfer protein beta isoform	3174.34	6003.54	6644.4	4034.36	5078.89	4764.34
O35737	O35737;Q8C2Q7	HNRH1_MOUSE	Hnrnph1	Heterogeneous nuclear ribonucleoprotein H	7234.91	2905.4	4895.2	5753.58	NA	3045.17
P62281	P62281;A0A1B0GSE8;A0A1B0GRR3	RS11_MOUSE	Rps11	40S ribosomal protein S11	54654.8	64680.4	47628.8	65802.5	22705.4	58057.5
Q03141	Q03141;A0A1Y7VNZ6	MARK3_MOUSE	Mark3	MAP/microtubule affinity-regulating kinase 3	1613.88	2368.02	1792.55	1508.93	1006.63	2555.87
O70404	O70404;A0A0U1RPE8;A0A0R4J0R1	VAMP8_MOUSE	Vamp8	Vesicle-associated membrane protein 8	15252.2	13725.5	25752.8	14296.1	15217.2	18560.5
Q7TMY8	Q7TMY8;F6UYC1;A2AFQ0;F6XP90	HUWE1_MOUSE	Huwe1	E3 ubiquitin-protein ligase HUWE1	3460.81	2119.32	2105.5	4210.63	1006.48	1533.76
Q60973	Q60973;A2AFI9;A2AFJ1;F6ZLC6	RBBP7_MOUSE	Rbbp7	Histone-binding protein RBBP7	3840.85	1693.21	1197.3	4081.02	577.549	1254.54
O35316	O35316	SC6A6_MOUSE	Slc6a6	Sodium- and chloride-dependent taurine transporter	77304.7	88214.3	65606.4	59715.2	76104.8	67332.3
Q8BRN9	Q8BRN9;F6XC25	C2D1B_MOUSE	Cc2d1b	Coiled-coil and C2 domain-containing protein 1B	13134.2	12694.5	12047.8	11019.2	11246.7	11033.4
P70362	P70362	UFD1_MOUSE	Ufd1	Ubiquitin recognition factor in ER-associated degradation protein 1	932.563	2933.51	1000.71	1660.83	1686.56	931.526
Q9Z1Z2	Q9Z1Z2	STRAP_MOUSE	Strap	Serine-threonine kinase receptor-associated protein	13189.8	8033.51	6506.41	12150	3645.98	8588.71
P28229	P28229	CXG1_MOUSE	Gjc1	Gap junction gamma-1 protein	6591.25	2424.73	14418.8	6478.31	NA	7265.63
Q9JKW0	Q9JKW0	AR6P1_MOUSE	Arl6ip1	ADP-ribosylation factor-like protein 6-interacting protein 1	5016.09	8355.59	5948.73	9276.46	3528.69	4206.91
P51881	P51881;P48962	ADT2_MOUSE	Slc25a5	ADP/ATP translocase 2	5226.64	11450.7	8556.13	6043.29	9871.94	6307.19
P47877	P47877;D3YU40	IBP2_MOUSE	Igfbp2	Insulin-like growth factor-binding protein 2	27277.1	34211.3	35233.9	29150.7	23007.4	33040.7
Q61382	Q61382	TRAF4_MOUSE	Traf4	TNF receptor-associated factor 4	6516.75	8994.82	5885.71	6629.16	7852.28	4368.07
P63001	P63001;Q3TLP8	RAC1_MOUSE	Rac1	Ras-related C3 botulinum toxin substrate 1	95478.4	118199	155798	88501.4	143674	93423.1
Q5DTK1	Q5DTK1	CHSS3_MOUSE	Chsy3	Chondroitin sulfate synthase 3	26741.7	25970.3	23311	27182.6	21072.1	18750.9
Q9CX48	Q9CX48;F6QZB1	ZCH10_MOUSE	Zcchc10	Zinc finger CCHC domain-containing protein 10	904.355	NA	1181.73	1215.55	NA	623.177
P47199	P47199;D3Z2X0;D3YWU6;A0A0A6YXR4;D3Z4Q4;D3YUG9;V9GXY8;A0A0G2JFU5	QOR_MOUSE	Cryz	Quinone oxidoreductase	11099.2	6499.65	6264.67	12521.5	5624.96	2900.21
P62862	P62862;Q642K5;A0A494B9Z0;A0A494BBA8	RS30_MOUSE	Fau	40S ribosomal protein S30	3367.65	3618.75	6273.45	2621.05	4637.46	4438.25
Q9R0M0	Q9R0M0;F7BHW1	CELR2_MOUSE	Celsr2	Cadherin EGF LAG seven-pass G-type receptor 2	1168.3	1454.72	1346.92	1264.37	NA	1070.6
P62827	P62827	RAN_MOUSE	Ran	GTP-binding nuclear protein Ran	235246	180773	200654	189358	207881	146873
Q9WU62	Q9WU62;A0A494B9T7;A0A494BAW4	INCE_MOUSE	Incenp	Inner centromere protein	2882.56	4693	5684.67	3615.57	1227.7	6859.5
Q80Y17	Q80Y17;A0A0R4J0S4	L2GL1_MOUSE	Llgl1	Lethal(2) giant larvae protein homolog 1	2226.13	1019.93	3062.94	1540.32	NA	2176.24
Q9JHW9	Q9JHW9	AL1A3_MOUSE	Aldh1a3	Aldehyde dehydrogenase family 1 member A3	1060.33	1031.07	756.185	1356.77	NA	320.941
P0C0A3	P0C0A3;B1AZ42;B1AZ41	CHMP6_MOUSE	Chmp6	Charged multivesicular body protein 6	15459.3	11151.9	16526.8	17965.2	3267.83	16894
O88968	O88968	TCO2_MOUSE	Tcn2	Transcobalamin-2	12208.5	8749.1	7418.88	4877.38	12232.4	7992.56
P11370	P11370;P10404	ENV2_MOUSE	Fv4	Retrovirus-related Env polyprotein from Fv-4 locus	417652	125293	509481	123912	645389	161846
P13439	P13439;D6RJ62	UMPS_MOUSE	Umps	Uridine 5'-monophosphate synthase	5268.54	2242.72	3002.57	3512.3	3475.25	2315.82
Q9D1G5	Q9D1G5;Q8JZX5;A2AKH7	LRC57_MOUSE	Lrrc57	Leucine-rich repeat-containing protein 57	7943.17	12184	5945.76	9493.25	4152.98	9426.35
Q8K2A1	Q8K2A1;E0CXC5	GULP1_MOUSE	Gulp1	PTB domain-containing engulfment adapter protein 1	2224.04	3019.65	2460.55	2140.91	2175.03	2502.7
Q4VAA7	Q4VAA7	SNX33_MOUSE	Snx33	Sorting nexin-33	30513.5	24631.4	31349.3	30181	17929.3	28447.7
Q3UHD6	Q3UHD6;A0A0G2JF85	SNX27_MOUSE	Snx27	Sorting nexin-27	9050.19	11494.2	8412.53	11141.2	8034.34	6471.07
Q9QY06	Q9QY06;E9PWZ6;A0A1D5RLD1;E9PZW8;E9QKV6	MYO9B_MOUSE	Myo9b	Unconventional myosin-IXb	1772.72	363.381	2690.43	1300.75	NA	1550.11
P52480;P53657	P52480;P53657;G3X925;E9Q509	KPYM_MOUSE;KPYR_MOUSE	Pklr;Pkm	Pyruvate kinase PKM	92651.8	121160	276678	232529	31165.8	171272
Q5SQX6;Q7TMB8	Q7TMB8;Q5SQX6;F6QD74;A0A0R4J119	CYFP1_MOUSE;CYFP2_MOUSE	Cyfip1;Cyfip2	Cytoplasmic FMR1-interacting protein 2	14792.9	4299.23	8749.36	10038.6	2266.66	12402.4
Q9CQW2	Q9CQW2;Q8VEH3;A0A0N4SVB8;F6QKK2	ARL8B_MOUSE	Arl8b	ADP-ribosylation factor-like protein 8B	6569.53	23591.1	54584.7	31354.7	16429.9	27422.2
O88983	O88983	STX8_MOUSE	Stx8	Syntaxin-8	9772.24	9148.28	16604	13135.8	8720.74	9702.17
Q9CXT7	Q9CXT7	TM192_MOUSE	Tmem192	Transmembrane protein 192	1068.07	3998.56	3361.83	3529.64	639.447	3319.76
P17918	P17918	PCNA_MOUSE	Pcna	Proliferating cell nuclear antigen	8315.41	4554.53	4948.41	8451.59	1768.21	5616.19
Q9QZB7	Q9QZB7	ARP10_MOUSE	Actr10	Actin-related protein 10	1887.81	2326.44	3492.39	3836.51	1226.24	1791.55
O35516	O35516	NOTC2_MOUSE	Notch2	Neurogenic locus notch homolog protein 2	11885.3	21660.3	15349.9	13811.1	13889.7	15829.7
Q08093	Q08093	CNN2_MOUSE	Cnn2	Calponin-2	1663.49	1188.91	3080.63	2104.2	966.85	2213.24
Q8BPB0;Q921Y0	Q8BPB0;Q921Y0;Q3UDM0	MOB1A_MOUSE;MOB1B_MOUSE	Mob1a;Mob1b	MOB kinase activator 1B	19838.1	6567.44	8092.63	10218.6	NA	10269
P70290	P70290;B7ZCM0;B7ZCL8;B7ZCL9;A2AN84	EM55_MOUSE	Mpp1	55 kDa erythrocyte membrane protein	2336.16	5371.94	5506.64	3794.96	3416.33	4588.15
Q61982	Q61982	NOTC3_MOUSE	Notch3	Neurogenic locus notch homolog protein 3	2781.54	3905.33	4505.08	4085.72	4063.53	1846.22
Q9WUK2	Q9WUK2	IF4H_MOUSE	Eif4h	Eukaryotic translation initiation factor 4H	4651.05	9307.48	5206	5773.55	2407.18	8939.07
P60122	P60122	RUVB1_MOUSE	Ruvbl1	RuvB-like 1	15801.7	7809.22	8960.3	15338.6	7033.14	6726.74
Q3U487	Q3U487	HECD3_MOUSE	Hectd3	E3 ubiquitin-protein ligase HECTD3	3860.6	2484.28	2507.5	3828.2	NA	1445.2
P57787	P57787;B1ATM1;B1ATM2	MOT4_MOUSE	Slc16a3	Monocarboxylate transporter 4	7014.1	6022.41	3170.67	4436.77	4137.9	5909.23
Q05722	Q05722;G3X995	CO9A1_MOUSE	Col9a1	Collagen alpha-1(IX) chain	NA	7616	4174.35	2787.64	9723.88	3294.55
Q99KR6	Q99KR6	RNF34_MOUSE	Rnf34	E3 ubiquitin-protein ligase RNF34	1200.64	497.45	1057.29	1138.38	NA	503.883
Q91YR1	Q91YR1	TWF1_MOUSE	Twf1	Twinfilin-1	4490.36	4130.28	4384.63	3712.66	3827.6	4089.55
Q91WP0	Q91WP0	MASP2_MOUSE	Masp2	Mannan-binding lectin serine protease 2	1846.88	4477.34	695.85	3907.04	1090.46	1283.78
P07214	P07214;A0A1L1SSH9;Q5NCU4;Q5NCU3	SPRC_MOUSE	Sparc	SPARC	12967.6	27763	22628.2	13478.3	29447.2	13773.5
Q9D8Y0	Q9D8Y0;Q8C845	EFHD2_MOUSE	Efhd2	EF-hand domain-containing protein D2	2560.17	6524.06	1867.71	2289.21	4245.67	NA
P06802	P06802;G3X9S2;E9QQ26;A0A0R4J1Q7	ENPP1_MOUSE	Enpp1	Ectonucleotide pyrophosphatase/phosphodiesterase family member 1	1008.83	280.7	NA	1024.33	176.858	530.3
P54923	P54923	ADPRH_MOUSE	Adprh	[Protein ADP-ribosylarginine] hydrolase	2725.09	1510.55	1991.29	2252.08	844.548	2479.71
P70336	P70336;A0A1Y7VMN0;F8VPK5	ROCK2_MOUSE	Rock2	Rho-associated protein kinase 2	1362.5	1835.72	1234.55	886.316	NA	1760.31
Q8R0J7	Q8R0J7	VP37B_MOUSE	Vps37b	Vacuolar protein sorting-associated protein 37B	89794.4	100315	74785.4	93375.1	59187.6	84738.7
Q9JMA2	Q9JMA2	TGT_MOUSE	Qtrt1	Queuine tRNA-ribosyltransferase catalytic subunit 1	2328.53	1334.85	NA	2347.99	825.666	1751.78
A2AVA0	A2AVA0	SVEP1_MOUSE	Svep1	Sushi, von Willebrand factor type A, EGF and pentraxin domain-containing protein 1	1714.96	2798.21	3521.21	2219.47	3973.29	1008.76
P62270	P62270;F6YVP7;A0A1Y7VKY1	RS18_MOUSE	Rps18	40S ribosomal protein S18	65523.7	65268.8	86348.2	67938.7	59390.3	67421.4
Q9Z2U0	Q9Z2U0	PSA7_MOUSE	Psma7	Proteasome subunit alpha type-7	5622.24	3048.16	3336.74	5903.68	2032.92	2832.76
P99024	P99024	TBB5_MOUSE	Tubb5	Tubulin beta-5 chain	238510	249151	226120	326348	156407	157488
Q3TNA1	Q3TNA1	XYLB_MOUSE	Xylb	Xylulose kinase	8723.87	9079.82	7819.32	14449.1	7075.84	1459.97
Q9JHR7	Q9JHR7;F6RPJ9	IDE_MOUSE	Ide	Insulin-degrading enzyme	7610.41	9846.83	NA	7427.78	3964.84	12104.5
Q811B1	Q811B1;F8VPK6	XYLT1_MOUSE	Xylt1	Xylosyltransferase 1	4542.03	2110.11	3493.09	3895.44	3357.05	1855.46
A0A1L1SS44;Q60709	Q60709;A0A1L1SS44	A0A1L1SS44_MOUSE;Q60709_MOUSE	Aplp2	Amyloid-like protein 2 (Fragment)	1084.6	1149.04	389.211	785.161	NA	NA
Q61090	Q61090	FZD7_MOUSE	Fzd7	Frizzled-7	76033.3	165285	60359.4	120178	117644	33268.2
Q91ZD4	Q91ZD4;D3YY75	VANG2_MOUSE	Vangl2	Vang-like protein 2	1969.68	2496.46	1907.52	1219.83	1876.27	2634.25
P23591	P23591;A0A2R8VKL9;A0A2R8W6N0;A0A2R8W6P6;A0A2R8VHD0;A0A2R8VI39	FCL_MOUSE	Gfus	GDP-L-fucose synthase	3057.86	2838.75	1605.91	1795.95	914.816	4038.61
O70589	O70589;A0A067XG53;F6Y9I5	CSKP_MOUSE	Cask	Peripheral plasma membrane protein CASK	6800.05	5003.01	4531.23	5244.48	2604.93	6852.09
Q8BZF8	Q8BZF8	PGM5_MOUSE	Pgm5	Phosphoglucomutase-like protein 5	1454.45	NA	NA	1309.83	NA	NA
Q07113	Q07113	MPRI_MOUSE	Igf2r	Cation-independent mannose-6-phosphate receptor	42994.9	58137.9	42513.7	50885.1	40516.6	37983.9
Q9D8F3	Q9D8F3	S52A2_MOUSE	Slc52a2	Solute carrier family 52, riboflavin transporter, member 2	2325.1	4938.39	3086.32	2832.08	3314.48	3180.89
P58465	P58465;G3UXN0	CTDSL_MOUSE	Ctdspl	CTD small phosphatase-like protein	383.702	945.218	1321.14	1080.76	NA	512.262
P97326	P97326	CADH6_MOUSE	Cdh6	Cadherin-6	2017.31	2691.73	3046.15	1277.86	3197.11	2521.53
P62960;Q9JKB3	Q9JKB3;Q9Z2C8;P62960;B2RUF0;A0A0A0MQD2	YBOX1_MOUSE;YBOX3_MOUSE	Ybx1;Ybx3	Y-box-binding protein 1	7441.11	2972.38	3797.69	4182.88	68.3979	8572.33
P47915	P47915;W4VSN7	RL29_MOUSE	Rpl29	60S ribosomal protein L29	1000.9	3976.17	1424.99	1926.82	NA	NA
P59326;Q8BYK6;Q91YT7	P59326;Q91YT7;Q8BYK6;A2AWN8	YTHD1_MOUSE;YTHD2_MOUSE;YTHD3_MOUSE	Ythdf1;Ythdf2;Ythdf3	YTH domain-containing family protein 1	8668.92	6338.67	8111.16	9445.54	NA	4481.11
Q07832	Q07832	PLK1_MOUSE	Plk1	Serine/threonine-protein kinase PLK1	5042.38	5515.6	2936.72	4014.43	2397.96	5783.6
E9Q236;E9Q467	E9Q467;E9Q236	E9Q236_MOUSE;E9Q467_MOUSE	Abcc4	ATP-binding cassette, sub-family C (CFTR/MRP), member 4	24087.3	19603.9	23131.1	20677.1	17305.2	22427.1
P42227	P42227	STAT3_MOUSE	Stat3	Signal transducer and activator of transcription 3	2944.03	2613.87	1073.63	2679.41	1571.15	1746.8
Q3UQ44	Q3UQ44	IQGA2_MOUSE	Iqgap2	Ras GTPase-activating-like protein IQGAP2	2116.5	750.479	1004.33	1051.15	1021.18	1429.1
Q9ET01	Q9ET01;Q3UEJ6	PYGL_MOUSE	Pygl	Glycogen phosphorylase, liver form	14592.9	9257.45	8145.2	16204.5	6354.96	6389.23
P14152	P14152;A0A5F8MPN8;B1ATQ3	MDHC_MOUSE	Mdh1	Malate dehydrogenase, cytoplasmic	13833.8	9703.26	9671.52	8410.19	5106.04	16530.2
Q61543	Q61543;F8WHM5	GSLG1_MOUSE	Glg1	Golgi apparatus protein 1	5027.95	7242.29	7496.54	8632.99	4553.21	4702.84
P97363	P97363	SPTC2_MOUSE	Sptlc2	Serine palmitoyltransferase 2	732.424	NA	943.957	470.426	NA	1047.22
Q04592	Q04592	PCSK5_MOUSE	Pcsk5	Proprotein convertase subtilisin/kexin type 5	1904.8	471.369	NA	890.017	NA	1261.54
Q62077	Q62077;A2A4A6	PLCG1_MOUSE	Plcg1	1-phosphatidylinositol 4,5-bisphosphate phosphodiesterase gamma-1	845.905	NA	546.354	622.828	NA	637.866
Q62261	Q62261;A0A0A0MQG2	SPTB2_MOUSE	Sptbn1	Spectrin beta chain, non-erythrocytic 1	1799.18	1069.66	1365.23	1284.47	NA	1273.79
Q80UM3	Q80UM3;A0A0A6YW80;G3X8Y3	NAA15_MOUSE	Naa15	N-alpha-acetyltransferase 15, NatA auxiliary subunit	5140.43	2486.52	2218.22	2318.69	1141.38	5464.02
P43252	P43252;E9PY53	PI2R_MOUSE	Ptgir	Prostacyclin receptor	3521.12	6943.91	6622.82	5164.26	NA	NA
Q9JI11	Q9JI11	STK4_MOUSE	Stk4	Serine/threonine-protein kinase 4	736.351	873.237	NA	864.405	NA	595.053
P54227	P54227;D3Z1Z8;D3Z5N2	STMN1_MOUSE	Stmn1	Stathmin	4041.7	3801.79	3099.86	2741.64	662.913	6522.72
Q8VC30	Q8VC30;Q3UTZ4;A0A494BBI2;A0A494BB96	TKFC_MOUSE	Tkfc	Triokinase/FMN cyclase	3269.93	1902.68	1779.61	4073.22	1069.81	1169.48
P63276	P63276	RS17_MOUSE	Rps17	40S ribosomal protein S17	13390.4	18094.9	21381.1	15784.4	19377	12846.9
Q922H4	Q922H4	GMPPA_MOUSE	Gmppa	Mannose-1-phosphate guanyltransferase alpha	3476.49	5597.62	2746.02	6418.4	2562.71	1753.23
Q9JHW4	Q9JHW4;A0A0N4SUV6;A0A0N4SUU3;A0A0N4SWB3	SELB_MOUSE	Eefsec	Selenocysteine-specific elongation factor	758.028	1034.17	385.638	700.547	70.6985	1206.67
Q99JP0	Q99JP0;A0A3Q4EGQ9;E9QNE9	M4K3_MOUSE	Map4k3	Mitogen-activated protein kinase kinase kinase kinase 3	1314.52	NA	536.461	736.811	NA	946.614
Q8BZZ3;Q9DBH0	Q8BZZ3;Q9DBH0;Q3TXI7;A0A1D5RM92	WWP1_MOUSE;WWP2_MOUSE	Wwp1;Wwp2	NEDD4-like E3 ubiquitin-protein ligase WWP1	6998.06	12526.8	6729.64	7960.94	NA	NA
P97447	P97447;A2AEY2;A2AEY1;A2AEX6;A2AEX8;A2AEX7	FHL1_MOUSE	Fhl1	Four and a half LIM domains protein 1	2509.32	7643.21	2566.92	3758.47	4881.64	2930.78
P61080	P61080	UB2D1_MOUSE	Ube2d1	Ubiquitin-conjugating enzyme E2 D1	2724.38	4907.52	2232.85	3066.55	2919.93	2994.64
Q61411	Q61411	RASH_MOUSE	Hras	GTPase HRas	14002.3	28408.5	40257.1	18550.1	42138.6	14580.8
Q91X51;Q99JX3	Q99JX3;Q91X51;A2ATI9;A2ATI8;A2ATI6	GORS1_MOUSE;GORS2_MOUSE	Gorasp1;Gorasp2	Golgi reassembly-stacking protein 1	583.431	1297.83	937.982	1305.25	NA	408.985
P62897	P62897	CYC_MOUSE	Cycs	Cytochrome c, somatic	1739.48	1185.09	NA	1378.61	646.543	1976.38
P15208	P15208	INSR_MOUSE	Insr	Insulin receptor	1291.72	2196.55	1682.94	1309.44	1743.69	1663.95
Q8C407	Q8C407	YIPF4_MOUSE	Yipf4	Protein YIPF4	1233.21	3472.83	2328.27	1981.5	2296.78	NA
A2AQ07	A2AQ07	TBB1_MOUSE	Tubb1	Tubulin beta-1 chain	123002	121310	184272	148700	165996	76511
Q78ZA7	Q78ZA7;B7ZNL2;A0A140LJB5	NP1L4_MOUSE	Nap1l4	Nucleosome assembly protein 1-like 4	9709.93	5376.4	2738.17	9054.05	1400.79	5816.36
Q61545	Q61545;Q5SUS9;Q5SUT0	EWS_MOUSE	Ewsr1	RNA-binding protein EWS	2434.59	2727.79	6858.48	2872.72	3774.94	4325.76
Q91VE6	Q91VE6;E0CXU3	MK67I_MOUSE	Nifk	MKI67 FHA domain-interacting nucleolar phosphoprotein	881.522	571.806	1146.44	791.284	NA	NA
Q99KJ8	Q99KJ8	DCTN2_MOUSE	Dctn2	Dynactin subunit 2	3367.04	1646.9	4250.82	3627.93	2329.75	2503.92
E9Q6Q4;E9Q912	Q3TU36;E9Q6Q4;E9Q912	E9Q6Q4_MOUSE;E9Q912_MOUSE	Rap1gds1	RAP1, GTP-GDP dissociation stimulator 1	2503.31	1924.73	2937.94	1668.32	2499.41	2560.05
P97855	P97855	G3BP1_MOUSE	G3bp1	Ras GTPase-activating protein-binding protein 1	5495.43	3874.46	1794.82	4083.45	424.489	5699.19
O70281	O70281	TPST1_MOUSE	Tpst1	Protein-tyrosine sulfotransferase 1	764.416	338.463	NA	630.892	NA	377.535
Q9Z1N5	Q9Z1N5	DX39B_MOUSE	Ddx39b	Spliceosome RNA helicase Ddx39b	7750.29	784.177	4805.08	5437.91	NA	2694.55
Q9CX56	Q9CX56;Q9CPS5;Q3TG45	PSMD8_MOUSE	Psmd8	26S proteasome non-ATPase regulatory subunit 8	1392.59	1171.13	1803.18	1551.96	746.517	1695.79
Q9JHZ2	Q9JHZ2	ANKH_MOUSE	Ankh	Progressive ankylosis protein	2227.09	3928.18	NA	3028.99	NA	2601.13
Q8BUV8	Q8BUV8	GP107_MOUSE	Gpr107	Protein GPR107	2956.8	6657.18	4571.28	2612.88	NA	6044.19
P62855	P62855	RS26_MOUSE	Rps26	40S ribosomal protein S26	22435.9	43525	27247.2	8436.93	33977.4	42924.2
P28474	P28474	ADHX_MOUSE	Adh5	Alcohol dehydrogenase class-3	37047	44417.3	32724.1	58789.3	27006.6	18761.5
Q3UJB0	Q3UJB0;A0A494B9S9	Q3UJB0_MOUSE	Sf3b2	Splicing factor 3b, subunit 2	1566.16	1087.82	NA	1215.09	NA	NA
Q922H1	Q922H1	ANM3_MOUSE	Prmt3	Protein arginine N-methyltransferase 3	1753.39	NA	NA	1210.11	NA	2002.48
O35405	O35405;D3Z179;D6RCG9;D3YY25	PLD3_MOUSE	Pld3	5'-3' exonuclease PLD3	22657.4	56764.6	37968.2	20153.1	72881.4	14518.3
Q8CI32	Q8CI32	BAG5_MOUSE	Bag5	BAG family molecular chaperone regulator 5	36197.9	18711.8	35665.2	26856.9	19719.5	36409.1
Q6PGH0	Q6PGH0	UBTD2_MOUSE	Ubtd2	Ubiquitin domain-containing protein 2	2114.9	1631.39	1672.26	2296.57	1536.23	1135.01
E9PV24	E9PV24	FIBA_MOUSE	Fga	Fibrinogen alpha chain	47971.3	82186.3	86798.5	87907.2	58515.4	52594.6
Q6ZQA6	Q6ZQA6;A0A0A6YX40	IGSF3_MOUSE	Igsf3	Immunoglobulin superfamily member 3	27101.5	20726.9	28970.9	24587.6	20711	25158.4
O08553;Q62188	P97427;O08553;Q62188;Q6P1J1;Q3TT92;E9PWE8	DPYL2_MOUSE;DPYL3_MOUSE	Dpysl2;Dpysl3	Dihydropyrimidinase-related protein 2	1434.34	602.116	973.572	455.182	974.896	1332.47
Q80T21	Q80T21	ATL4_MOUSE	Adamtsl4	ADAMTS-like protein 4	4622.83	6361.83	10398.5	6665.08	9943.49	3024.2
Q9QWR8	Q9QWR8	NAGAB_MOUSE	Naga	Alpha-N-acetylgalactosaminidase	7365.4	10946.6	5061.56	8489.93	1810.39	11174.5
Q9D0F9	Q9D0F9;A2CEK3	PGM1_MOUSE	Pgm1	Phosphoglucomutase-1	76162.9	31388.4	26294.2	60695	31225.2	31100.3
O54833	O54833;A0A1D5RM74;A0A1D5RM55;A0A1D5RLE4	CSK22_MOUSE	Csnk2a2	Casein kinase II subunit alpha'	5351.86	2662.87	2719.63	5050.75	791.73	4031.85
Q9QXG4	Q9QXG4;A2AQN4;A2AQN5	ACSA_MOUSE	Acss2	Acetyl-coenzyme A synthetase, cytoplasmic	1594.17	288.093	482.103	1241.85	NA	208.141
Q9R1X5	Q9R1X5;F8WJ10	MRP5_MOUSE	Abcc5	Multidrug resistance-associated protein 5	2585.84	3769.4	2804.48	2790.46	1733.5	3902.31
B1AZP2	B1AZP2;B7ZNS2;F6YMR0;H3BJW9;E9PUF2;H3BKJ0;I1E4X0	DLGP4_MOUSE	Dlgap4	Disks large-associated protein 4	1524.14	1603.1	6137.95	2988.88	310.968	5225.05
Q921F2	Q921F2;Q8R0B4;Q6VYI5;A0A087WRZ5;Q8BLD4;Q6VYI4;A0A087WSE4;A0A087WR97;A0A087WQA5	TADBP_MOUSE	Tardbp	TAR DNA-binding protein 43	8599.86	7662.86	9925.39	10430.6	4812.3	8868.68
Q61271	Q61271	ACV1B_MOUSE	Acvr1b	Activin receptor type-1B	1227.33	724.34	699.265	963.75	824.739	653.04
P17563	P17563;Q63836;D6RHN2;G3UWK0;A0A0R4J135;G3UZT2	SBP1_MOUSE	Selenbp1	Methanethiol oxidase	5629.08	3580.34	5735.16	5928.38	4211.53	3626.34
Q60872;Q8BMJ3	Q8BMJ3;Q60872;A0A494BB95	IF1AX_MOUSE;IF1A_MOUSE	Eif1a;Eif1ax	Eukaryotic translation initiation factor 1A	7732	3369.49	4404.86	4656.94	2375.21	7253.84
P70182	P70182;D3YUY3;F8WI18	PI51A_MOUSE	Pip5k1a	Phosphatidylinositol 4-phosphate 5-kinase type-1 alpha	4710.39	3563.98	4156.46	3803.68	3061.11	4589.4
Q9JK38	Q9JK38;A0A2I3BQY4;A0A2I3BQE3	GNA1_MOUSE	Gnpnat1	Glucosamine 6-phosphate N-acetyltransferase	5520.77	2116.27	1371	3327.84	2782.15	2191.79
Q91V64	Q91V64	ISOC1_MOUSE	Isoc1	Isochorismatase domain-containing protein 1	2575.56	2423.64	2124.35	3270.8	1190.35	2104.61
Q8BFR4	Q8BFR4	GNS_MOUSE	Gns	N-acetylglucosamine-6-sulfatase	8811.44	11091.8	9151.46	8198.7	7679.73	10901.9
P32233	P32233	DRG1_MOUSE	Drg1	Developmentally-regulated GTP-binding protein 1	2710.41	3581.76	3119.33	3760.53	2443.47	2471.95
Q9WUA3	Q9WUA3;Q8C605	PFKAP_MOUSE	Pfkp	ATP-dependent 6-phosphofructokinase, platelet type	5316.21	2847.2	3068.24	4123.31	3558.96	2673.28
Q9DCH4	Q9DCH4	EIF3F_MOUSE	Eif3f	Eukaryotic translation initiation factor 3 subunit F	11260.5	8547.63	6931.58	13119.9	5466.39	6076.67
Q9EPL8	Q9EPL8	IPO7_MOUSE	Ipo7	Importin-7	2431.17	1672.08	2865.36	2786.54	1133.5	2508.55
Q3UBX0	Q3UBX0;D3Z7P2;D3Z0I8;D3YX08;D3Z3Z2	TM109_MOUSE	Tmem109	Transmembrane protein 109	1305.42	904.626	3574.19	2027.43	NA	1530.78
Q3TA68;Q3TAQ9	Q3TA68;Q3TAQ9	Q3TA68_MOUSE;Q3TAQ9_MOUSE	Wdr36	WD repeat domain 36	1329.96	3468.71	1241.53	2752.98	NA	962.755
G5E829;Q6Q477	Q6Q477;G5E829;A0A1W2P7C7;E9Q828;F7AAP4	AT2B1_MOUSE;AT2B4_MOUSE	Atp2b1;Atp2b4	Plasma membrane calcium-transporting ATPase 1	16836.5	20257.1	13119.4	17693	3998.35	24669.8
P80318	P80318;Q3U0I3;E9Q133;F6Q609	TCPG_MOUSE	Cct3	T-complex protein 1 subunit gamma	42535.6	21438.8	28400.8	40141.6	15413.6	29767.8
P61079	P62838;Q6ZWY6;P61079;A0A494BAN1;A0A494BA56;A0A0G2JGL0;A0A0G2JE32	UB2D3_MOUSE	Ube2d3	Ubiquitin-conjugating enzyme E2 D3	108265	112437	63215.7	80535.8	106467	75382.4
P10852	P10852;A0A0U1RPK4	4F2_MOUSE	Slc3a2	4F2 cell-surface antigen heavy chain	318182	304960	418750	352833	121757	488432
Q9QY73	Q9QY73;D3YVM2	TMM59_MOUSE	Tmem59	Transmembrane protein 59	117440	99386.7	176501	152682	26692	184627
P62245	P62245;F8WJ41	RS15A_MOUSE	Rps15a	40S ribosomal protein S15a	24207.3	14003.5	23220.1	17003.3	23955.6	15920.4
P48758	P48758;A0A1B0GRG8	CBR1_MOUSE	Cbr1	Carbonyl reductase [NADPH] 1	14363	11228.4	3902.21	14813.3	4256.27	8258.03
Q8C5W3	Q8C5W3	TBCEL_MOUSE	Tbcel	Tubulin-specific chaperone cofactor E-like protein	2662.19	1086.83	1791.71	2067.05	NA	1358.2
Q99KN1	Q99KN1;F7ANZ2;D6RDR8;A2AIS9	ARRD1_MOUSE	Arrdc1	Arrestin domain-containing protein 1	11707.5	13023.7	4439.87	9415.49	11449.6	6192.59
Q9JJY4	Q9JJY4	DDX20_MOUSE	Ddx20	Probable ATP-dependent RNA helicase DDX20	3473.45	4438.98	5058.9	3297.5	NA	4723.87
Q9WTM5	Q9WTM5	RUVB2_MOUSE	Ruvbl2	RuvB-like 2	15904.7	9478.21	11778.3	17976	8455.14	8046.03
Q9ER71	Q9ER71;F2Z463;D3YX61	RHOJ_MOUSE	Rhoj	Rho-related GTP-binding protein RhoJ	6162.59	8349.35	8878.34	8597.38	6762.68	6343.81
P26041	P26041	MOES_MOUSE	Msn	Moesin	42969.9	26989.9	47057	36329.3	25621.4	46637.2
P48774	P48774;E9PV63;E9PVM7	GSTM5_MOUSE	Gstm5	Glutathione S-transferase Mu 5	6858.82	3660.76	1470.19	4931.76	4082.6	2111.85
P61961	P61961;H7BWZ1;D3YW97	UFM1_MOUSE	Ufm1	Ubiquitin-fold modifier 1	4075.1	19345.4	7290.52	8527.79	12142.9	7864.31
O09110	O09110	MP2K3_MOUSE	Map2k3	Dual specificity mitogen-activated protein kinase kinase 3	2589.45	1864.09	3237.2	2292.84	2094.94	2763.89
Q06335	Q06335;Q60709;A0A1L1SS44	APLP2_MOUSE	Aplp2	Amyloid-like protein 2	26698.1	32110.1	66757.3	31492.6	43923.5	41351.1
Q6P5H2	Q6P5H2	NEST_MOUSE	Nes	Nestin	53121.4	NA	15576.4	31948.5	NA	NA
A2ALL9;Q0VF55;Q8C048	Q0VF55;Q8C048;A2ALL9	A2ALL9_MOUSE;Q0VF55_MOUSE;Q8C048_MOUSE	Atp2b3	Calcium-transporting ATPase	2605.13	2140.5	1701.05	739.564	NA	3258.36
Q922K7	Q922K7;E9QN31	NOP2_MOUSE	Nop2	Probable 28S rRNA (cytosine-C(5))-methyltransferase	2234.71	1187.1	1699.88	2843.9	509.448	1413.77
P63242	Q8BGY2;P63242;A0A0A0MQM0	IF5A1_MOUSE	Eif5a	Eukaryotic translation initiation factor 5A-1	38081	28776.8	25456.4	27795.8	23685.2	34456.4
B0V2N1;Q64487	B0V2N1;Q64487;Q5SPA9;B9EJA3;G3UY75;G3UX60;G3UYU6;G3UWK6;E9PVW8;E9Q7I7	PTPRD_MOUSE;PTPRS_MOUSE	Ptprd;Ptprs	Receptor-type tyrosine-protein phosphatase S	47457.1	46444.1	87598.2	53962.8	27463.9	87562.1
Q8VBW1	Q8VBW1;E9Q6T2;F6UKB4;E9Q151	SC6A8_MOUSE	Slc6a8	Sodium- and chloride-dependent creatine transporter 1	20378.8	39747.5	20807.4	22399.1	21705.4	31261.3
Q8K1S3	Q8K1S3	UNC5B_MOUSE	Unc5b	Netrin receptor UNC5B	839.971	1367.6	862.785	675.953	1063.52	1120.63
Q7TQH0	Q7TQH0;Q3TGG2;E9Q5Q0;A0A0U1RPL0	ATX2L_MOUSE	Atxn2l	Ataxin-2-like protein	3700.39	4474.51	2056.74	2803.22	2172.23	4570.26
P59708	P59708;A0A1W2P7L7	SF3B6_MOUSE	Sf3b6	Splicing factor 3B subunit 6	2909.16	4658.05	2923.12	3652.79	2166.92	3972.01
P14246	P14246	GTR2_MOUSE	Slc2a2	Solute carrier family 2, facilitated glucose transporter member 2	1528.05	1621.48	2028.94	1611.77	NA	NA
O88207	O88207	CO5A1_MOUSE	Col5a1	Collagen alpha-1(V) chain	3652.28	9267.13	14374.2	7827.03	NA	9164.1
Q00623	Q00623	APOA1_MOUSE	Apoa1	Apolipoprotein A-I	526254	451255	501863	660079	112689	609139
Q9R0Q7	Q9R0Q7;D3Z7C6	TEBP_MOUSE	Ptges3	Prostaglandin E synthase 3	32553.1	4901.44	14635.3	33491.5	3756.07	11433.7
Q60676	Q60676;F7BX26	PPP5_MOUSE	Ppp5c	Serine/threonine-protein phosphatase 5	2508.02	1070.1	1447.6	1839.98	NA	1292.18
A0A1Y7VME9;A0A1Y7VMH7;E9Q9B7	A0A1Y7VMH7;A0A1Y7VME9;A0A1Y7VNF8;E9Q9B7	A0A1Y7VME9_MOUSE;A0A1Y7VMH7_MOUSE;E9Q9B7_MOUSE	Kidins220	Kinase D-interacting substrate 220	5412.25	6246.62	5295.28	6150.51	2582.81	7117.37
Q00493	Q00493	CBPE_MOUSE	Cpe	Carboxypeptidase E	12567.8	17051.1	21150.6	12078	22774.9	12639
Q91ZB7	Q91ZB7	MRGRE_MOUSE	Mrgpre	Mas-related G-protein coupled receptor member E	7182.13	6092.64	11244.3	12800.4	NA	2495.67
P53994;P59279	P59279;P53994;G3V022;G3UXQ7;Q3TEG7	RAB2A_MOUSE;RAB2B_MOUSE	Rab2a;Rab2b	Ras-related protein Rab-2A	26935.5	39919.7	32758.5	36321.3	20980.1	35972.3
Q91ZW3	Q91ZW3	SMCA5_MOUSE	Smarca5	SWI/SNF-related matrix-associated actin-dependent regulator of chromatin subfamily A member 5	4646.3	1659.03	4680.94	3039.01	NA	3821.49
Q03141;Q05512	Q03141;Q8VHJ5;Q05512;Q8CIP4;E9QMP6;A0A0R4J0B1;A0A1Y7VNZ6;Q3T9A3;E9Q9N6;F6ZS70;A0A0R4J227;E9PYX3;A0A0A6YY78;E9Q2J6	MARK2_MOUSE;MARK3_MOUSE	Mark2;Mark3	MAP/microtubule affinity-regulating kinase 3	10115.3	12628.2	15010	7852.18	NA	15724.4
P82198	P82198;Q3UXJ2	BGH3_MOUSE	Tgfbi	Transforming growth factor-beta-induced protein ig-h3	25375	20684.8	25758.9	34378.2	11451.3	21467.9
Q9CY50	Q9CY50;A0A286YDB7;A0A286YCT4;A0A286YCG8	SSRA_MOUSE	Ssr1	Translocon-associated protein subunit alpha	2993.75	3337.63	2213.71	4926.13	1703.68	1377.47
Q8VED9	Q8VED9	LEGL_MOUSE	Lgalsl	Galectin-related protein	1992.93	2749.02	666.497	1409.69	3094.08	566.594
Q60841	Q60841	RELN_MOUSE	Reln	Reelin	12940.3	17543.4	8793.53	16777	13300.6	6757.71
O70480	O70480;Q8BSN6	VAMP4_MOUSE	Vamp4	Vesicle-associated membrane protein 4	6456.91	4630.06	6649.63	7834.71	2019.12	6781.35
Q60716	Q60716;Q5SX75	P4HA2_MOUSE	P4ha2	Prolyl 4-hydroxylase subunit alpha-2	3058	1043.07	1581.6	2704.65	1128.09	1497.65
P61514	P61514;A0A1D5RL86	RL37A_MOUSE	Rpl37a	60S ribosomal protein L37a	5189.94	5909.73	6292.31	4164.39	6807.48	5343.56
Q8VD57	Q8VD57;A0A0A6YY20;A0A0A6YX21	SFT2B_MOUSE	Sft2d2	Vesicle transport protein SFT2B	12151.8	15900	11223.2	16726.2	1094.39	19024
Q9CTG6	Q9CTG6;E9Q2A4;E9PYX5	AT132_MOUSE	Atp13a2	Polyamine-transporting ATPase 13A2	2701.94	2163.41	2319.17	1730.76	3174.55	1837.77
O55029	O55029	COPB2_MOUSE	Copb2	Coatomer subunit beta'	6981	2594.57	1853.77	7047.75	758.236	2923.04
Q7TQI3	Q7TQI3;D3YWF6	OTUB1_MOUSE	Otub1	Ubiquitin thioesterase OTUB1	7085.77	3456.77	1474.16	5600.65	1279.55	4400.24
Q9JHS3	Q9JHS3	LTOR2_MOUSE	Lamtor2	Ragulator complex protein LAMTOR2	5532.43	16133.2	9197.33	10764.8	8783.79	9429.53
P28271	P28271	ACOC_MOUSE	Aco1	Cytoplasmic aconitate hydratase	64581.7	28058	27277.8	53668.8	38230.1	20701.4
Q62376	Q62376	RU17_MOUSE	Snrnp70	U1 small nuclear ribonucleoprotein 70 kDa	6738.17	7691.83	1840.21	10170.7	2128.53	2982.39
Q8K0C9	Q8K0C9	GMDS_MOUSE	Gmds	GDP-mannose 4,6 dehydratase	2683.73	1768.02	2899.29	3071.69	1000.92	2832.91
P21460	P21460	CYTC_MOUSE	Cst3	Cystatin-C	17259.9	30882.7	33532.9	15386.3	31723.6	29618.6
O89053	O89053;A0A0U1RPY8;G3UYK8	COR1A_MOUSE	Coro1a	Coronin-1A	14796.6	8217.45	6219.72	13827.3	7521.45	6124.82
P16125	P16125;A0A6I8MX27;D3Z7F0	LDHB_MOUSE	Ldhb	L-lactate dehydrogenase B chain	57700.3	41271.6	33055.4	61171.3	32877.3	30047.5
Q8BX70	Q8BX70;A0A1L1SUY8	VP13C_MOUSE	Vps13c	Vacuolar protein sorting-associated protein 13C	4132.89	4854.01	NA	6827.47	3434.89	2408.88
Q6ZWU9	Q6ZWU9;A0A0G2JDW7;A0A0G2JG29	RS27_MOUSE	Rps27	40S ribosomal protein S27	4578.1	1584.82	1621.73	1455.44	NA	3424.81
Q9JHG7	Q9JHG7;A0A1W2P8F6	PK3CG_MOUSE	Pik3cg	Phosphatidylinositol 4,5-bisphosphate 3-kinase catalytic subunit gamma isoform	904.303	NA	NA	1324.1	NA	376.642
Q9CQ80	Q9CQ80;A2A4J8;A2A4K0;A8XY17	VPS25_MOUSE	Vps25	Vacuolar protein-sorting-associated protein 25	38446.5	19749.8	21365.1	33085.3	6680.9	35069.7
P62264	P62264;D3Z7I1;D3YVF4	RS14_MOUSE	Rps14	40S ribosomal protein S14	24961.1	18121.4	19746.1	14347.2	21900.8	22854.1
Q8VEK0	Q8BHG3;Q8VEK0;D3YVV1	CC50A_MOUSE	Tmem30a	Cell cycle control protein 50A	6989.83	6750.88	4903.52	6308.06	4295.89	6937.07
Q9WTL7	Q9WTL7	LYPA2_MOUSE	Lypla2	Acyl-protein thioesterase 2	10475.8	13200.6	10213.8	11619.5	9107.58	11165.8
A0A1W2P7A1;F7AEH4;Q6ZWZ6	Q6ZWZ6;F7AEH4;A0A1W2P7A1	A0A1W2P7A1_MOUSE;F7AEH4_MOUSE;Q6ZWZ6_MOUSE	Rps12	40S ribosomal protein S12	5254.17	1163.33	1131.77	2471.71	1526.16	3110.91
P97823	P97823;J3QP56;D3YUG4;D3Z269	LYPA1_MOUSE	Lypla1	Acyl-protein thioesterase 1	5425.92	13145.5	5923.21	10294.2	8451.68	4335.9
P21836	P21836;A0A0G2JDM6	ACES_MOUSE	Ache	Acetylcholinesterase	5967.63	1478.32	2881.82	1675.2	NA	4812.96
D3Z0S9	D3Z0S9	D3Z0S9_MOUSE	Tsg101	Tumor susceptibility gene 101 protein (Fragment)	626.156	67668.6	64271.3	84604.4	29412.9	11024
Q9CQE8	Q9CQE8	RTRAF_MOUSE	RTRAF	RNA transcription, translation and transport factor protein	6035.15	5131.11	8608.01	4429.15	7104.98	7120.55
Q3ULJ0	Q3ULJ0	GPD1L_MOUSE	Gpd1l	Glycerol-3-phosphate dehydrogenase 1-like protein	2299.44	2600.49	NA	3301.48	NA	1323.29
Q8K3W0	Q8K3W0;D3Z7P0;E9Q0U3;A0A0J9YV56	BABA2_MOUSE	Babam2	BRISC and BRCA1-A complex member 2	1691.43	541.365	NA	880.604	NA	1227.34
Q9CR64	Q9CR64;E0CY07	KISHA_MOUSE	Tmem167a	Protein kish-A	865.588	188.335	NA	609.643	386.412	NA
A0A0N4SUQ3	A0A0N4SUQ3	A0A0N4SUQ3_MOUSE	Rasgrp4	RAS guanyl-releasing protein 4	6388.22	16894.3	17286.3	6557.31	23610.2	8183.17
P21995	P21995	EMB_MOUSE	Emb	Embigin	41496.4	73968.4	67898.6	50246.3	77073.3	46147.8
Q8JZR6	Q8JZR6	S4A8_MOUSE	Slc4a8	Electroneutral sodium bicarbonate exchanger 1	1529.93	6560.48	1820.08	1879.76	6241.04	1256.64
Q91ZV3	Q91ZV3	DCBD2_MOUSE	Dcbld2	Discoidin, CUB and LCCL domain-containing protein 2	2477.26	661.279	2615.71	1815.03	NA	NA
A0A087WRT4;A0A1L1SQU7;F2Z4A3	A0A1L1SQU7;F2Z4A3;A0A087WRT4	A0A087WRT4_MOUSE;A0A1L1SQU7_MOUSE;F2Z4A3_MOUSE	Fat1	FAT atypical cadherin 1	48919.4	51890.5	32712.9	33763.4	53986.1	38646.2
P32067	P32067;F6SXM5	LA_MOUSE	Ssb	Lupus La protein homolog	6867.11	5829.34	6177.18	6897.44	3897.94	7076.79
Q9D2V7	Q9D2V7	CORO7_MOUSE	Coro7	Coronin-7	6091.9	2335.44	3980.6	5378.75	1795.66	4576.99
Q922B2	Q922B2;Q8BJY7	SYDC_MOUSE	Dars1	Aspartate--tRNA ligase, cytoplasmic	17040.3	12966.9	8157.48	18226	6177.07	11769
Q8BY87	Q8BY87;A0A1L1SV73	UBP47_MOUSE	Usp47	Ubiquitin carboxyl-terminal hydrolase 47	3392.07	3430.06	2497.08	2946.96	NA	2943.15
Q9D8E6	Q9D8E6	RL4_MOUSE	Rpl4	60S ribosomal protein L4	169259	128227	130435	141187	112422	152374
Q9CZM2	Q9CZM2;B8JKK2	RL15_MOUSE	Rpl15	60S ribosomal protein L15	133855	41835.8	34473.4	69835.6	20413	109153
Q9ET26	Q9ET26	RN114_MOUSE	Rnf114	E3 ubiquitin-protein ligase RNF114	1276.06	1854.56	1893.59	1565.47	2627.15	577.139
Q6ZQL4	Q6ZQL4;A0A3Q4EGD3;A0A3Q4EHN7	WDR43_MOUSE	Wdr43	WD repeat-containing protein 43	2280.32	997.262	1834.89	3791.02	26.6179	1040.46
P35492	P35492	HUTH_MOUSE	Hal	Histidine ammonia-lyase	13153.1	6599.43	4212.25	10937.4	8562.02	3276.29
P16056	P16056;F8VQL0	MET_MOUSE	Met	Hepatocyte growth factor receptor	6758.33	7587.45	3489.02	5901.64	6738.73	4312.75
Q61699	Q61699;E9Q0U7	HS105_MOUSE	Hsph1	Heat shock protein 105 kDa	10501.9	7020.87	7914.88	9507.83	5850.84	8824.89
Q91VC3	Q91VC3;E9PV04;A0A0N4SVP8	IF4A3_MOUSE	Eif4a3	Eukaryotic initiation factor 4A-III	9042.29	10691.6	6147.72	9363.05	6805.88	8441.86
P39447	P39447;B9EHJ3	ZO1_MOUSE	Tjp1	Tight junction protein ZO-1	5609.33	4883.43	4672.1	5028.35	5433.37	3960.62
P68373	P68369;P05214;P05213;P68373;A0A2R8VHF3	TBA1C_MOUSE	Tuba1c	Tubulin alpha-1C chain	379632	274106	300849	529323	56848.3	322344
Q5FWK3	Q5FWK3;A2AH25	RHG01_MOUSE	Arhgap1	Rho GTPase-activating protein 1	4797.78	4758.64	2601.45	3399.62	3568.02	4616.07
Q91V92	Q91V92;Q3V117	ACLY_MOUSE	Acly	ATP-citrate synthase	160688	77922.2	73644.5	150347	70437.7	76755.9
Q01149	Q01149	CO1A2_MOUSE	Col1a2	Collagen alpha-2(I) chain	14288.4	27458.5	53099.4	19996	46506.1	23895.7
Q91WC9	Q91WC9	DGLB_MOUSE	Daglb	Diacylglycerol lipase-beta	1497.37	2070.74	2122.69	1235.13	NA	2381.6
Q99LE6	Q99LE6	ABCF2_MOUSE	Abcf2	ATP-binding cassette sub-family F member 2	11252.3	11404.1	8186.26	13756.4	5785.7	9875.5
P54775	P54775;A0A140LIZ5	PRS6B_MOUSE	Psmc4	26S proteasome regulatory subunit 6B	17654.8	11276.8	12472.5	17864.4	10972.3	10675.3
Q9JIF7	Q9JIF7	COPB_MOUSE	Copb1	Coatomer subunit beta	12168.4	3285.48	5314.84	10056.7	4315.17	5450.46
G5E829	G5E829;A0A1W2P867	AT2B1_MOUSE	Atp2b1	Plasma membrane calcium-transporting ATPase 1	15291.3	25756.5	23368	18211.5	19780.5	23505.7
Q8BT07	Q8BT07	CEP55_MOUSE	Cep55	Centrosomal protein of 55 kDa	50820	35938.5	31868.4	40941.5	39209.1	33107.3
Q8BMJ2	Q8BMJ2	SYLC_MOUSE	Lars1	Leucine--tRNA ligase, cytoplasmic	8541.05	3807.15	2420.76	7168.72	3250.54	3682.5
Q8CHR6	Q8CHR6	DPYD_MOUSE	Dpyd	Dihydropyrimidine dehydrogenase [NADP(+)]	8039.99	1724.03	2090.74	6099.55	3535.22	1689.75
Q8R0S2	Q8R0S2;E9PUA3;A0A1D5RM83;A0A5F8MPT9	IQEC1_MOUSE	Iqsec1	IQ motif and SEC7 domain-containing protein 1	680.919	641.309	1660.55	840.816	NA	1058.85
P09528	P09528;A0A494BA92;A0A494B9D4;A0A494BAP3	FRIH_MOUSE	Fth1	Ferritin heavy chain	51764.3	48392.1	36660.7	30543.8	78095.2	22098
Q61646	Q61646	HPT_MOUSE	Hp	Haptoglobin	229783	256634	159887	327108	175057	115470
Q7TPQ9	Q7TPQ9;E0CY84	ARRD3_MOUSE	Arrdc3	Arrestin domain-containing protein 3	4048.87	12735.9	14566.7	5853.91	17038	7088.32
O55222	O55222;A0A1B0GR42;A0A1B0GRF6;D3YZA5	ILK_MOUSE	Ilk	Integrin-linked protein kinase	36972.4	32310.2	26158.2	45397	27662.9	18232.7
Q9R0Q6;Q9WV32	Q9WV32;Q9R0Q6;Q91Z25;F6VVE6;A0A0G2JF52	ARC1A_MOUSE;ARC1B_MOUSE	Arpc1a;Arpc1b	Actin-related protein 2/3 complex subunit 1A	3855.92	NA	1182.36	2249.22	NA	2570.46
Q9D7S9	Q9D7S9	CHMP5_MOUSE	Chmp5	Charged multivesicular body protein 5	21874.4	6112.65	16527.3	11495.9	11222	19876.6
A2A432	A2A432;E9PXY1;J3QJX0	CUL4B_MOUSE	Cul4b	Cullin-4B	789.661	1175.58	NA	1354.96	NA	526.062
Q62073	Q62073;Q923A8;A2AP93;A2AP92	M3K7_MOUSE	Map3k7	Mitogen-activated protein kinase kinase kinase 7	1288.33	638.001	478.044	773.637	NA	761.066
P26262	P26262	KLKB1_MOUSE	Klkb1	Plasma kallikrein	11339.7	43542.5	28831.8	23165.4	41839.3	15159.7
P33896	P33896;A0A338P6X7	INAR1_MOUSE	Ifnar1	Interferon alpha/beta receptor 1	11250.3	22282.6	12389.9	18548.6	1238.25	24197.9
Q9WVJ9	Q9WVJ9;F6Z1C2;A0A494BBF0;E9Q3F3;G5E8D6;A0A494BAR1;E9Q3N9	FBLN4_MOUSE	Efemp2	EGF-containing fibulin-like extracellular matrix protein 2	7522.36	2811.35	3849.35	4529.5	NA	NA
O08917	O08917;G3UYU4	FLOT1_MOUSE	Flot1	Flotillin-1	33333.2	34939.4	38300.4	45263.5	25443.6	31406
F8VQ29	A0A0A6YXJ2;F8VQ29	F8VQ29_MOUSE	Iqgap3	IQ motif-containing GTPase-activating protein 3	5324.2	4882.58	5692.37	5673.04	2183.72	7378.55
Q812F8	Q812F8	MGT4B_MOUSE	Mgat4b	Alpha-1,3-mannosyl-glycoprotein 4-beta-N-acetylglucosaminyltransferase B	2627.75	815.025	1321.21	NA	2019.7	1024.53
P22892	P22892;Q8CBB7	AP1G1_MOUSE	Ap1g1	AP-1 complex subunit gamma-1	4366.73	2972.15	3150.57	3875.45	4037.88	2146.64
E9PWC4	E9PWC4	E9PWC4_MOUSE	Slc6a9	Sodium- and chloride-dependent glycine transporter 1	3325.27	4154.56	3183.2	4978.34	2905.46	2343.11
Q8CIE0	Q8CIE0;D3Z0P3;E9QK54;H3BJV3;E9QLL8	SPA11_MOUSE	Serpina11	Serpin A11	4751.03	525.168	726.289	2732.68	NA	1106.03
P49718	P49718	MCM5_MOUSE	Mcm5	DNA replication licensing factor MCM5	4519.67	3492	4599.05	5171.66	NA	2898.03
B2RQC6	B2RQC6;E9QAI5;G3UWN2	PYR1_MOUSE	Cad	CAD protein	23365.2	13495.9	16037.6	26124.5	10063.3	14588.2
Q8CI94	Q8CI94	PYGB_MOUSE	Pygb	Glycogen phosphorylase, brain form	11087.3	4205.3	3271.05	10416.2	2271.26	5139.79
O70475	O70475	UGDH_MOUSE	Ugdh	UDP-glucose 6-dehydrogenase	20386.4	12082	7712.81	18586.4	12663.7	7349.79
Q8BH24	Q8BH24	TM9S4_MOUSE	Tm9sf4	Transmembrane 9 superfamily member 4	1621.01	NA	1069.72	1554.32	NA	1030.95
P26040	P26040	EZRI_MOUSE	Ezr	Ezrin	7080.75	4996.15	4145.74	5066.58	3488.67	7037.3
Q8VC12	Q8VC12;Q3UEL5	HUTU_MOUSE	Uroc1	Urocanate hydratase	21595.7	9577.82	4645.87	15842.8	12394.7	6197.11
Q7TMY7	Q7TMY7;B2KGD7	IPO8_MOUSE	Ipo8	Importin-8	435.097	NA	NA	NA	575.855	261.027
Q9JIM1	Q9JIM1	S29A1_MOUSE	Slc29a1	Equilibrative nucleoside transporter 1	30075.4	9715.78	10415.6	12216.5	NA	19978.1
P26516	P26516	PSMD7_MOUSE	Psmd7	26S proteasome non-ATPase regulatory subunit 7	10975.6	5017.82	5234.29	11692.3	4043.95	4687.51
Q8R2U4	Q8R2U4;A2APZ3;A0A0A6YXY1;A0A0A6YX97	NTM1A_MOUSE	Ntmt1	N-terminal Xaa-Pro-Lys N-methyltransferase 1	4893.44	4587.08	3859.25	6805.18	3459.89	2579.81
P19324	P19324	SERPH_MOUSE	Serpinh1	Serpin H1	26858.6	8270.49	16402.3	21911.7	6615.55	21139.4
O08638;Q61879;Q6URW6;Q8VDD5	Q6URW6;Q8VDD5;O08638;Q61879;A0A2R8VHF9;Q3UH59;A0A338P6K2;K3W4R2;E9QPE7;Q5SV64;A0A140LI60	MYH10_MOUSE;MYH11_MOUSE;MYH14_MOUSE;MYH9_MOUSE	Myh10;Myh11;Myh14;Myh9	Myosin-11	10771.4	12584.4	17151.4	13518	8281.72	17251.5
Q8K211	Q8K211;A8Y5P1	COPT1_MOUSE	Slc31a1	High affinity copper uptake protein 1	68487.4	87303.3	47516.6	65825.1	51621.4	78593.7
Q60770	Q60770	STXB3_MOUSE	Stxbp3	Syntaxin-binding protein 3	7906	6828.08	5770.39	4597.02	5951.65	9228.19
O35674	O35674	ADA19_MOUSE	Adam19	Disintegrin and metalloproteinase domain-containing protein 19	337.183	761.108	NA	308.097	902.929	378.114
Q7TMM9	Q9CWF2;Q7TMM9	TBB2A_MOUSE	Tubb2a	Tubulin beta-2A chain	3626.15	3043.58	1019.3	3847.05	1989.62	1580.52
Q9QXB9	Q9QXB9	DRG2_MOUSE	Drg2	Developmentally-regulated GTP-binding protein 2	3329.85	3122.37	3712.78	4102.87	4732.62	973.289
P47809	P47809;M0QW52	MP2K4_MOUSE	Map2k4	Dual specificity mitogen-activated protein kinase kinase 4	1625.1	2190.21	1826.79	2538.07	1110.05	1797.89
P49025	P49025;D3Z1U0;F6SBR5;D3YU89;E9QL53	CTRO_MOUSE	Cit	Citron Rho-interacting kinase	1777.38	2476.48	3815.69	2111.67	734.052	4943.72
Q7TMS5	Q7TMS5;A0A0R4J0B6;D3Z150;D3YZX5;A0A0N4SWA2;S4R2E1	ABCG2_MOUSE	Abcg2	Broad substrate specificity ATP-binding cassette transporter ABCG2	2908	4692.57	3957.64	2381.94	2476.85	6299.15
Q6ZPE2	Q6ZPE2;F6S251	MTMR5_MOUSE	Sbf1	Myotubularin-related protein 5	580.571	1794.83	1379.08	2018.67	NA	404.118
Q9WU60	Q9WU60	ATRN_MOUSE	Atrn	Attractin	8577.29	8894.24	10704.9	9146.28	8358.8	9769.35
Q91VS8	Q91VS8;D3Z4C0	FARP2_MOUSE	Farp2	FERM, ARHGEF and pleckstrin domain-containing protein 2	2905.97	4107.98	871.161	3748.97	1192.06	2694.22
P35979	P35979	RL12_MOUSE	Rpl12	60S ribosomal protein L12	28075.9	65944.4	31269.5	35632.1	44976.4	40728.7
P13595	P13595;E9QB01;A0A0A6YY47;A0A0A6YY91	NCAM1_MOUSE	Ncam1	Neural cell adhesion molecule 1	7514.4	11429	8802.43	10148.4	6362.76	10360.6
Q07813	Q07813;A0A1B0GS13;A0A1B0GT81;A0A1B0GTA4;A0A1B0GSH8	BAX_MOUSE	Bax	Apoptosis regulator BAX	3871.32	7624.07	5188.32	5817.88	NA	4956.13
Q9CZ28	Q9CZ28;A2A6M1	SNF8_MOUSE	Snf8	Vacuolar-sorting protein SNF8	18516.5	19327	13847.1	19933.6	13208.3	16976.5
Q8BYI8	Q8BYI8	F234B_MOUSE	Fam234b	Protein FAM234B	3051.63	6707.03	5287.93	4483.52	6669.93	3451.21
Q01853	Q01853	TERA_MOUSE	Vcp	Transitional endoplasmic reticulum ATPase	35251.7	30629.8	36316.6	40817	13783.7	44612.6
Q99KP6	Q99KP6	PRP19_MOUSE	Prpf19	Pre-mRNA-processing factor 19	5092.3	2328.33	2235.72	4702.73	1595.94	3080.38
P50446;Q6IME9	P50446;Q6IME9	K2C6A_MOUSE;K2C72_MOUSE	Krt6a;Krt72	Keratin, type II cytoskeletal 6A	271.718	2958.27	943.513	1351.32	NA	NA
P61164;Q8R5C5	P61164;Q8R5C5;A0A494BB86	ACTY_MOUSE;ACTZ_MOUSE	Actr1a;Actr1b	Alpha-centractin	8029.19	7754.1	8298.24	11360.3	8091.51	3945.81
P70663	P70663	SPRL1_MOUSE	Sparcl1	SPARC-like protein 1	1065.03	756.206	1657.23	861.981	NA	1391.99
Q9DBH5	Q9DBH5	LMAN2_MOUSE	Lman2	Vesicular integral-membrane protein VIP36	8904.13	15409.6	6436.26	9593.26	11740.1	8554.89
Q61166	Q61166	MARE1_MOUSE	Mapre1	Microtubule-associated protein RP/EB family member 1	4508.59	3105.65	2974.69	3567.18	2162.17	4570.55
Q569Z5	Q569Z5;F8WHR6	DDX46_MOUSE	Ddx46	Probable ATP-dependent RNA helicase DDX46	819.472	1268.13	2123.88	1681.07	NA	1050.81
P26638	P26638;Q8C483	SYSC_MOUSE	Sars1	Serine--tRNA ligase, cytoplasmic	15559.8	3745.69	7587.73	10546.1	NA	6900.6
P62830	P62830;A2A6F8	RL23_MOUSE	Rpl23	60S ribosomal protein L23	20438.6	36044	27765.1	21471.2	30113.8	30408.6
Q922R8	Q922R8;Q3TML0;F7DBQ0	PDIA6_MOUSE	Pdia6	Protein disulfide-isomerase A6	4569.93	5068.63	5033.33	8334.92	943.872	5002.38
O54734	O54734	OST48_MOUSE	Ddost	Dolichyl-diphosphooligosaccharide--protein glycosyltransferase 48 kDa subunit	4029.64	4248.26	2464.59	2922.89	2895.61	4640.75
Q9EPK7	Q9EPK7;A0A2I3BQV5;E9PUW7	XPO7_MOUSE	Xpo7	Exportin-7	3089.53	2658.96	2261.56	5372.97	1083.49	1343.71
P70704	P70704;P98200;A0A0J9YV34;A0A0M3HEP7	AT8A1_MOUSE	Atp8a1	Phospholipid-transporting ATPase IA	997.503	2412.47	1350.3	1623.15	2217.13	796.013
E0CX65	E0CX65	E0CX65_MOUSE	Sirpa	Tyrosine-protein phosphatase non-receptor type substrate 1	6313.35	13500.9	26229	14367.6	NA	15549.3
E9Q557	E9Q557;E9PZW0	DESP_MOUSE	Dsp	Desmoplakin	2139.97	11223.2	5805.57	3108.52	10250.8	5327
O09173	O09173	HGD_MOUSE	Hgd	Homogentisate 1,2-dioxygenase	34440.9	16429.7	10294.7	25735.7	22237.2	11660.7
Q80U72	Q80U72	SCRIB_MOUSE	Scrib	Protein scribble homolog	5212.95	3374.65	4026.36	4071.42	3911.5	4315.3
Q8R001	Q8R001;E9Q6X0;D3YYK8	MARE2_MOUSE	Mapre2	Microtubule-associated protein RP/EB family member 2	8503.73	2850.52	4070.84	7988.61	NA	2041.91
Q8K354	Q8K354	CBR3_MOUSE	Cbr3	Carbonyl reductase [NADPH] 3	11697.1	8035.8	7967.6	10081.1	5563.82	11390.4
Q8CG48	Q8CG48;B1AWH6	SMC2_MOUSE	Smc2	Structural maintenance of chromosomes protein 2	2800.14	1597.65	1537.33	3173.06	710.713	1912.09
P49717	P49717	MCM4_MOUSE	Mcm4	DNA replication licensing factor MCM4	1992.44	1816.03	1240.64	2182.07	998.478	1751.31
P97765	P97765	WBP2_MOUSE	Wbp2	WW domain-binding protein 2	15838.6	21426.1	20194	11896.7	21191.9	23103.8
P62911	P62911	RL32_MOUSE	Rpl32	60S ribosomal protein L32	36662.8	22307.1	16973	28452.8	26414.1	19511.1
Q68FD5	Q68FD5;Q5SXR6	CLH1_MOUSE	Cltc	Clathrin heavy chain 1	249803	214847	301609	307100	151958	291570
P97464	P97464	EXT1_MOUSE	Ext1	Exostosin-1	13032.7	4106.04	11347.1	15320.4	10309.6	2283.57
Q9QZ73	Q9QZ73;Q3UT23;A0A140T8R8;A0A1Y7VP24;A0A0G2JGV7	DCNL1_MOUSE	Dcun1d1	DCN1-like protein 1	934.436	NA	161.112	614.188	NA	459.365
Q8BTW9	Q8BTW9	PAK4_MOUSE	Pak4	Serine/threonine-protein kinase PAK 4	3494.47	1732.47	1244.19	1625.62	NA	2602.04
Q9DC29	Q9DC29	ABCB6_MOUSE	Abcb6	ATP-binding cassette sub-family B member 6, mitochondrial	9427.74	18203.4	5109.39	9860.86	14841.6	7401.86
Q99M54	Q99M54	CDCA3_MOUSE	Cdca3	Cell division cycle-associated protein 3	4043.14	5031.29	5410.12	2821.45	8180.13	3204.28
Q91W96	Q91W96	APC4_MOUSE	Anapc4	Anaphase-promoting complex subunit 4	946.669	463.329	690.055	487.982	NA	885.471
P46471	P46471;Q8BVQ9	PRS7_MOUSE	Psmc2	26S proteasome regulatory subunit 7	24010.9	12923.6	15667.6	25984.8	10003.6	15628.4
Q99NB9	Q99NB9;G5E866	SF3B1_MOUSE	Sf3b1	Splicing factor 3B subunit 1	3470.61	3771.34	5295.64	3886.75	3362.87	5054.36
Q9EPJ9	Q9EPJ9;V9GXM1	ARFG1_MOUSE	Arfgap1	ADP-ribosylation factor GTPase-activating protein 1	512.957	1862.16	1451.92	695.272	1541.33	1519.63
Q8R1G2	Q8R1G2	CMBL_MOUSE	Cmbl	Carboxymethylenebutenolidase homolog	3342.52	NA	840.031	2052.68	NA	NA
Q8K2I4	Q8K2I4;A0A0R4J092;D6RGR1	MANBA_MOUSE	Manba	Beta-mannosidase	2467.48	3563.1	1602.41	2847.66	2280.41	2365.01
Q91Y03	Q91Y03	Q91Y03_MOUSE	Pcdhb16	Protocadherin beta 16	712.018	2436.53	2520.87	340.34	2331.7	2893.94
P31230	P31230;Q3UZG4	AIMP1_MOUSE	Aimp1	Aminoacyl tRNA synthase complex-interacting multifunctional protein 1	2616.35	NA	1622.64	1941.99	NA	2220.35
O35598	O35598;D3Z1E6;E9PYF2	ADA10_MOUSE	Adam10	Disintegrin and metalloproteinase domain-containing protein 10	121821	126584	95788.8	154716	68424.5	114995
Q9DC28	Q9DC28;Q9JMK2;Q3USK2;Q3TYE1;A0A668KLW3;F7A4U8	KC1D_MOUSE	Csnk1d	Casein kinase I isoform delta	6159.54	5359.42	4925.97	4470.25	5090.23	6601.03
Q91X83	Q91X83;A0A286YCQ9	METK1_MOUSE	Mat1a	S-adenosylmethionine synthase isoform type-1	20454.8	15350.7	15549.9	21821	20896.7	7752.64
Q5SWU9	Q5SWU9	ACACA_MOUSE	Acaca	Acetyl-CoA carboxylase 1	9388.22	4751.9	2901.29	8972.68	3292.35	4498.53
P42232	P42232	STA5B_MOUSE	Stat5b	Signal transducer and activator of transcription 5B	1401.34	NA	NA	1378.69	NA	NA
E9Q264	E9Q264	E9Q264_MOUSE	Myh15	Myosin, heavy chain 15	14150.3	24111.6	30928.4	34727.1	2316.95	31028.1
Q8BI06	Q8BI06	CEMIP_MOUSE	Cemip	Cell migration-inducing and hyaluronan-binding protein	4790.66	1922.74	1827.52	4105.28	1636.86	2663.31
O88958	O88958	GNPI1_MOUSE	Gnpda1	Glucosamine-6-phosphate isomerase 1	1754.39	1468.9	986.589	634.361	NA	2127.92
P56390	P56390	CKS2_MOUSE	Cks2	Cyclin-dependent kinases regulatory subunit 2	1471.34	NA	941.799	1689.56	NA	686.163
P80315	P80315;G5E839	TCPD_MOUSE	Cct4	T-complex protein 1 subunit delta	23784.6	16584.5	20914.2	28015.9	15499.4	16835.1
P06795	P06795;P21447	MDR1B_MOUSE	Abcb1b	ATP-dependent translocase ABCB1	6768.04	11829.2	10998.1	8129.85	12486.1	8531.05
O08738	O08738	CASP6_MOUSE	Casp6	Caspase-6	2263.32	2272.81	1997.54	3003.82	1886.08	1545.08
Q61210	Q61210;E9PUF7;F6ZN61	ARHG1_MOUSE	Arhgef1	Rho guanine nucleotide exchange factor 1	2184.89	1496.61	909.353	1763.54	NA	1253.16
Q9CUN6	Q9CUN6;E9PYU8;E9Q4K9	SMUF1_MOUSE	Smurf1	E3 ubiquitin-protein ligase SMURF1	4507.98	3065.68	4201.53	4483.05	3837.55	3287.94
A0A0A6YWM8	B2RUE8;A0A0A6YWM8	A0A0A6YWM8_MOUSE	Map4k4	Mitogen-activated protein kinase kinase kinase kinase 4	4975.11	5806.19	756.34	4262.69	2699.33	4418.83
Q6PDI5	Q6PDI5;A2ALV7	ECM29_MOUSE	Ecpas	Proteasome adapter and scaffold protein ECM29	3220.06	1684.61	1973.16	3812.13	1561.89	1413.18
P62746	P62746	RHOB_MOUSE	Rhob	Rho-related GTP-binding protein RhoB	13010.1	49785.8	71245	29633	72824.8	29980.7
Q8BHC1	Q8BHC1	RB39B_MOUSE	Rab39b	Ras-related protein Rab-39B	2223.87	4236.41	3328.79	3053.94	4247.93	2374.34
Q3V0B4	Q3V0B4	CFA65_MOUSE	Cfap65	Cilia- and flagella-associated protein 65	12438.8	8401.07	6108.16	10441.8	10616.2	5580.09
O09131	O09131;Q8K2Q2;A0A494BB82;A0A494BAB1;A0A494B9X6;A0A494BAY2	GSTO1_MOUSE	Gsto1	Glutathione S-transferase omega-1	6768.85	1718.82	1051.82	3387.49	1649.21	4394.89
Q61072	Q61072;E9Q638;A0A1B0GSW1;A0A140LHU0	ADAM9_MOUSE	Adam9	Disintegrin and metalloproteinase domain-containing protein 9	27121.8	50156.7	31220.6	40606.3	36662.8	30019.1
P20060	P20060	HEXB_MOUSE	Hexb	Beta-hexosaminidase subunit beta	3435.12	3071.24	5790.86	3647.32	3917.33	4602.99
Q6PA06	Q6PA06;E9QND8	ATLA2_MOUSE	Atl2	Atlastin-2	2001	1624.79	995.649	2072.58	NA	977.374
P62908	P62908;A0A140LI77;D3YV43	RS3_MOUSE	Rps3	40S ribosomal protein S3	44937.6	43276	32713.4	47902.7	35539	36306.5
Q99L45	Q99L45	IF2B_MOUSE	Eif2s2	Eukaryotic translation initiation factor 2 subunit 2	2166.74	3260.9	2304.79	1612.33	3729.94	2315.22
P36536;Q9CQC9	Q9CQC9;P36536;Q99JZ4	SAR1A_MOUSE;SAR1B_MOUSE	Sar1a;Sar1b	GTP-binding protein SAR1a	16379	13646.3	6623.68	8856.38	18545.9	8891.79
Q8CIN4	Q8CIN4	PAK2_MOUSE	Pak2	Serine/threonine-protein kinase PAK 2	3749.12	1368.62	4083.21	3625	2107.34	3381.64
P84096	P84096	RHOG_MOUSE	Rhog	Rho-related GTP-binding protein RhoG	37707.1	53920.1	49234.6	34772.5	59447	45416.4
Q9Z2P8	Q9Z2P8;A0A0U1RP87	VAMP5_MOUSE	Vamp5	Vesicle-associated membrane protein 5	18103.4	35843.8	27174.6	18712.1	32875.9	28829.2
P62331	P62331	ARF6_MOUSE	Arf6	ADP-ribosylation factor 6	51157.3	56299.4	28435.8	38135.8	45673.9	51010.3
Q6GQT9	Q6GQT9	NOMO1_MOUSE	Nomo1	Nodal modulator 1	10466.8	23042.6	6586.11	18833.5	NA	7690.52
O55234	O55234	PSB5_MOUSE	Psmb5	Proteasome subunit beta type-5	7095.37	4709.12	1697.64	7731.64	3335.36	2337.7
Q80X90;Q8BTM8;Q8VHX6	Q80X90;Q8VHX6;Q8BTM8;B7FAU9;B7FAV1;F6XC15	FLNA_MOUSE;FLNB_MOUSE;FLNC_MOUSE	Flna;Flnb;Flnc	Filamin-B	6041.44	4272.52	1776.28	4970.76	3059.23	3977.33
Q68FD9	Q68FD9;D3YTS3	K1549_MOUSE	Kiaa1549	UPF0606 protein KIAA1549	5260.88	12207.5	6421.44	4857.47	12878.7	5992.19
Q60737	Q60737;Q6NSS6;A2ANR6	CSK21_MOUSE	Csnk2a1	Casein kinase II subunit alpha	20166.2	6271.21	11161.2	16104.4	2686.64	18554.8
Q9D6F9	Q9D6F9	TBB4A_MOUSE	Tubb4a	Tubulin beta-4A chain	13250.5	7610.18	11458	19794.9	4084.39	8235.26
Q8C788	Q8C788	Q8C788_MOUSE	Snx18	Sorting nexin	10148.3	18173.9	11908.2	13189.8	12350.5	14437.7
P62843	P62843;D3YTQ9	RS15_MOUSE	Rps15	40S ribosomal protein S15	9929.96	6928.06	5916.75	9473.65	1411.12	11750.2
Q99KD5	Q99KD5;A0A5K1VVS7	UN45A_MOUSE	Unc45a	Protein unc-45 homolog A	1255.55	2023.54	3007.05	2604.15	2119.75	1530.63
P61027	P61027	RAB10_MOUSE	Rab10	Ras-related protein Rab-10	29814.4	23078.6	24677	25995.4	12057.4	39182.8
P21279	P21279	GNAQ_MOUSE	Gnaq	Guanine nucleotide-binding protein G(q) subunit alpha	13117.2	31896.1	21915.4	24399.5	19040.4	23206.5
Q99PT1	Q99PT1	GDIR1_MOUSE	Arhgdia	Rho GDP-dissociation inhibitor 1	29143.2	25870.2	38175.3	19573.8	4551.4	68679.2
Q8VEK3	Q8VEK3	HNRPU_MOUSE	Hnrnpu	Heterogeneous nuclear ribonucleoprotein U	35993.3	14470.6	18487.1	36338	14824.1	17547.3
Q8C0Z1	Q8C0Z1;F6SQM4	F234A_MOUSE	Fam234a	Protein FAM234A	5704.81	3283.16	4767.89	4979.33	1575.9	7156.85
P60202	P60202	MYPR_MOUSE	Plp1	Myelin proteolipid protein	16551.7	16385.7	22435.6	23884.6	26017.5	5314.78
P70303;P70698	P70303;P70698	PYRG1_MOUSE;PYRG2_MOUSE	Ctps1;Ctps2	CTP synthase 2	1840.07	631.358	605.283	748.307	1442.83	877.92
Q9WV32	Q9WV32;Q91Z25;F6VVE6	ARC1B_MOUSE	Arpc1b	Actin-related protein 2/3 complex subunit 1B	15619.5	23480.3	19566.1	21402.1	12401.4	24722.7
Q6ZQ58	Q6ZQ58;Z4YJT3	LARP1_MOUSE	Larp1	La-related protein 1	5095.25	4848.86	3565.49	4952.87	2750.08	5788.39
P08752	P08752	GNAI2_MOUSE	Gnai2	Guanine nucleotide-binding protein G(i) subunit alpha-2	83740	49515	99495.2	85911.2	24799.8	121774
Q9CR16	Q9CR16	PPID_MOUSE	Ppid	Peptidyl-prolyl cis-trans isomerase D	5724.13	2525.23	6920.79	6240.78	3889.3	5023.74
Q99JI4	Q99JI4	PSMD6_MOUSE	Psmd6	26S proteasome non-ATPase regulatory subunit 6	10032.3	3471.47	6035.15	7407.89	3899.67	8214.03
Q9DCL9	Q9DCL9	PUR6_MOUSE	Paics	Multifunctional protein ADE2	8949.83	4033.07	7355.96	9054.12	4339.75	6934.03
Q3U9G9	Q3U9G9;A0A0A6YY12	LBR_MOUSE	Lbr	Delta(14)-sterol reductase LBR	1846.21	2112.78	2057.19	2946.39	NA	1062.82
O70628	O70628;D6RFN9;D6RGP8;A0A494B907;D6RH57;D6REE8;D3YTQ4;F7APE3;A0A494BAR7;A0A494BAI4	PDE9A_MOUSE	Pde9a	High affinity cGMP-specific 3',5'-cyclic phosphodiesterase 9A	725.041	3050.54	2491.57	1499.64	2677.21	NA
P48428	P48428;A0A1Y7VJ48	TBCA_MOUSE	Tbca	Tubulin-specific chaperone A	2526.63	2951.65	5556.69	2840.33	NA	4515.71
Q99PV0	Q99PV0	PRP8_MOUSE	Prpf8	Pre-mRNA-processing-splicing factor 8	6013.68	4538.3	3143.75	6697.06	2347.39	4656.15
Q8BTM8	Q8BTM8;B7FAU9;B7FAV1;F6Z2C0	FLNA_MOUSE	Flna	Filamin-A	19543	18339.5	17742	22344.1	13719.9	19592.3
P42208	P42208;D3Z3C0;D3YYB1;F6WYM0;E9Q3V6;D3Z1S1;F6UKN5	SEPT2_MOUSE	Septin2	Septin-2	15230.7	9224.27	12345	11911.5	9392.72	15517
Q9QZQ8	Q9QZQ8	H2AY_MOUSE	Macroh2a1	Core histone macro-H2A.1	7427	1663.59	3644.68	6602.72	957.521	5186.44
Q62419	Q62419;A0A3B2W7K0	SH3G1_MOUSE	Sh3gl1	Endophilin-A2	258126	96993.2	255210	241735	115545	254110
P61089	P61089;A0A1W2P7Z3	UBE2N_MOUSE	Ube2n	Ubiquitin-conjugating enzyme E2 N	19177.2	31759.2	17746.3	22774.4	28117.1	17918.7
Q99MQ4	Q99MQ4	ASPN_MOUSE	Aspn	Asporin	8289.76	12606.1	13246.8	18517.6	10491.3	5203.45
Q9JK81	Q9JK81;F7A3N3;F8WGG3	MYG1_MOUSE	Myg1	MYG1 exonuclease	2390.27	1937.38	2356.71	2232.74	NA	NA
Q6P5F9	Q6P5F9	XPO1_MOUSE	Xpo1	Exportin-1	5223.49	2191.23	2366.84	5341.46	1473.77	2990.72
A6H584	A6H584;A0A140T8W1;A0A140T8T7	CO6A5_MOUSE	Col6a5	Collagen alpha-5(VI) chain	622.513	1469.65	1277.64	1187.84	NA	1064.5
Q9DBU0	Q9DBU0;D3Z6X7;D3YWH4	TM9S1_MOUSE	Tm9sf1	Transmembrane 9 superfamily member 1	2580.42	417.816	581.948	1196.83	NA	NA
Q8BTZ5	Q8BTZ5	ANR46_MOUSE	Ankrd46	Ankyrin repeat domain-containing protein 46	7058.05	13210.2	10128.9	7342.35	15189.8	7956.29
P69566	P69566;E9Q5D6	RANB9_MOUSE	Ranbp9	Ran-binding protein 9	2040.06	1438.14	766.307	1727.48	NA	1111.15
Q8C0C7	Q8C0C7;E9PWY9	SYFA_MOUSE	Farsa	Phenylalanine--tRNA ligase alpha subunit	6282.55	2164.39	3172.63	4829.54	NA	2941.46
P10518	P10518	HEM2_MOUSE	Alad	Delta-aminolevulinic acid dehydratase	1248.86	2146.47	1127.42	1795.47	1582.78	1159.46
Q61753	Q61753;F6ZSB7	SERA_MOUSE	Phgdh	D-3-phosphoglycerate dehydrogenase	38219.4	30828.6	38237.8	42278.4	25103.6	40265.3
Q9CQF9	Q9CQF9;D3Z275;F7CIP8	PCYOX_MOUSE	Pcyox1	Prenylcysteine oxidase	7783.13	3283.44	1232.68	6037.54	981.071	5322.91
P26231	P26231	CTNA1_MOUSE	Ctnna1	Catenin alpha-1	121989	134158	132084	88874.7	133080	167618
Q80UG5	Q80UG5;A2A6U3;A2A6U5	SEPT9_MOUSE	Septin9	Septin-9	15519.7	15908.9	13621.3	17438.7	10442.8	17331.4
P56812	P56812;D3Z7Q5	PDCD5_MOUSE	Pdcd5	Programmed cell death protein 5	5708.85	6421.71	6389.64	5814.41	NA	6579.99
P04627	Q99N57;P04627;A0A0N4SWH5;B1AUP0	ARAF_MOUSE	Araf	Serine/threonine-protein kinase A-Raf	3189.99	4970.92	2762.29	4045.93	2069.53	4856.59
P50636	P50636;A0A2I3BRK4	RN19A_MOUSE	Rnf19a	E3 ubiquitin-protein ligase RNF19A	817.173	2561.97	2195.71	2686.1	752.494	2162.15
P54761;Q03137;Q61772	P54763;Q8CBF3;Q61772;Q03137;Q62413;P54761;Q03145;P54754;E0CYA3;Q8C8K1;G1K381;E9PWK7;A2BDQ4	EPHA4_MOUSE;EPHA7_MOUSE;EPHB4_MOUSE	Epha4;Epha7;Ephb4	Ephrin type-B receptor 4	12726.5	24878.3	24912.4	18425.4	23560.4	20821.8
O08810	O08810;G3UZ34;A2AH85	U5S1_MOUSE	Eftud2	116 kDa U5 small nuclear ribonucleoprotein component	9588.25	9786.4	6609.18	12660.4	5263.02	8182.75
A2A5Z6;Q9CUN6	A2A5Z6;Q9CUN6;E9PYU8;E9Q4K9	SMUF1_MOUSE;SMUF2_MOUSE	Smurf1;Smurf2	E3 ubiquitin-protein ligase SMURF2	8296.65	4654.65	6318.69	7550.58	7587.25	4222.95
P68372;P99024;Q7TMM9;Q9CWF2	P99024;Q9CWF2;Q7TMM9;P68372	TBB2A_MOUSE;TBB2B_MOUSE;TBB4B_MOUSE;TBB5_MOUSE	Tubb2a;Tubb2b;Tubb4b;Tubb5	Tubulin beta-4B chain	79586.9	84933.4	116240	180679	28505.9	72901.9
Q8BFY9	Q99LG2;Q8BFY9;Q3TKD0	TNPO1_MOUSE	Tnpo1	Transportin-1	5263.98	5713.65	3513.47	5403.4	6524.53	2636.06
Q6RHR9	Q6RHR9;Q4VBG2;A0A0N4SUZ0;E9PZ12;A0A0R4J0S6;A0A0N4SWH0	MAGI1_MOUSE	Magi1	Membrane-associated guanylate kinase, WW and PDZ domain-containing protein 1	635.384	664.224	627.567	679.473	NA	612.483
Q91W45;Q9D6V8	Q91W45;Q9D6V8	PAI2B_MOUSE;PAIP2_MOUSE	Paip2;Paip2b	Polyadenylate-binding protein-interacting protein 2B	4464.57	10302.9	11458.6	12132.4	6860.6	7385.33
P63323	P63323;Q6ZWZ6;F7AEH4;A0A1W2P7A1	RS12_MOUSE	Rps12	40S ribosomal protein S12	9619.51	5087.25	4970.71	6807.93	4141.97	8845.23
Q9CZN7	Q9CZN7	GLYM_MOUSE	Shmt2	Serine hydroxymethyltransferase, mitochondrial	2699.85	1215.24	838.661	2818.25	650.634	1314.17
Q6PIX5	Q6PIX5	RHDF1_MOUSE	Rhbdf1	Inactive rhomboid protein 1	4956.3	12132.8	6447.26	7939.59	9199.44	6552.07
Q91VN0	Q91VN0	LRP5_MOUSE	Lrp5	Low-density lipoprotein receptor-related protein 5	3001.65	5368.53	3667.4	5272	2377.3	4474.66
A0A0R4J1J3;A0A0U1RNK2	A0A0R4J1J3;A0A0U1RNK2	A0A0R4J1J3_MOUSE;A0A0U1RNK2_MOUSE	St3gal5	Lactosylceramide alpha-2,3-sialyltransferase	1383.63	6231.04	1252.89	NA	4471.35	1483.86
Q62318	Q62318	TIF1B_MOUSE	Trim28	Transcription intermediary factor 1-beta	2929.83	2292.41	1323.33	3290.64	1802.87	1502.64
P62315	P62315	SMD1_MOUSE	Snrpd1	Small nuclear ribonucleoprotein Sm D1	2425.45	2066.85	1660.82	1286.84	2820.56	2094.86
P27600	P27600;A0A0G2JG40	GNA12_MOUSE	Gna12	Guanine nucleotide-binding protein subunit alpha-12	1564.16	NA	1457.69	1217.55	NA	1828.79
P61082	P61082;F7CDT0;F6WMC0	UBC12_MOUSE	Ube2m	NEDD8-conjugating enzyme Ubc12	7201.95	8550.88	6428.85	9235.08	8817.33	4313.15
Q8C129	Q8C129	LCAP_MOUSE	Lnpep	Leucyl-cystinyl aminopeptidase	7029.76	9305.6	5121.87	7582.48	3243.34	10809.5
[truncated: 1,814 more rows]

## Sheet: all
gene_name	logFC	logCPM	LR	PValue	FDR	log10FDR	DEG
Gna12;Gna13	-21.453	11.3163	133.519	6.96e-31	1.64e-27	26.7861	Down
Gnai2;Gnai3;Gnao1;Gnas	21.1324	10.9958	132.991	9.08e-31	1.64e-27	26.7861	Up
Pard3	-19.4868	9.35019	119.658	7.52e-28	9.03e-25	24.0444	Down
Epha3;Epha7;Ephb4	-17.9422	7.80573	95.4485	1.52e-22	1.15e-19	18.9396	Down
Rasal3	-17.6747	7.53825	95.3506	1.59e-22	1.15e-19	18.9396	Down
Srsf5;Srsf6	-17.4315	7.29514	83.3994	6.7e-20	4.03e-17	16.3951	Down
Rab13;Rab3a;Rab3d;Rab8a;Rab8b	-17.2626	7.12625	82.6705	9.69e-20	4.99e-17	16.3019	Down
Myh14	-17.7907	7.65421	79.8769	3.98e-19	1.79e-16	15.746	Down
Gnb2;Gnb4	-18.0427	7.9062	72.8762	1.38e-17	5.53e-15	14.2576	Down
Pbld1	-16.7174	6.58115	65.4355	6e-16	2.16e-13	12.6648	Down
Lcat	-16.8756	6.7393	64.9458	7.7e-16	2.52e-13	12.5983	Down
Spp2	-17.5413	7.40491	62.984	2.08e-15	6.26e-13	12.2036	Down
Gm884	-16.6159	6.4797	56.1341	6.77e-14	1.88e-11	10.7267	Down
Prg4	-16.3332	6.19709	51.1651	8.49e-13	2.19e-10	9.66049	Down
Pianp	-16.4529	6.31671	50.9798	9.33e-13	2.24e-10	9.64944	Down
Igsf8	-16.9019	6.76563	50.4614	1.22e-12	2.74e-10	9.56277	Down
Lasp1	-15.9682	5.83222	46.2614	1.03e-11	2.19e-09	8.65891	Down
Susd6	-16.1828	6.04676	45.5369	1.5e-11	3e-09	8.52313	Down
1700074P13Rik	16.7724	6.63612	43.9805	3.32e-11	6.29e-09	8.20139	Up
Ptprk;Ptprm	-15.7413	5.60545	40.654	1.82e-10	3.27e-08	7.48497	Down
Ptpra	-15.678	5.54222	38.8758	4.52e-10	7.75e-08	7.11075	Down
Frk;Met;Src	-15.6382	5.50247	37.5652	8.84e-10	1.45e-07	6.83926	Down
Tubb2a;Tubb4a;Tubb4b;Tubb5	-15.7903	5.65442	36.7592	1.34e-09	2.09e-07	6.67907	Down
Cemip;Cemip2	-15.4772	5.34154	34.119	5.18e-09	7.78e-07	6.10887	Down
Cdip1	-15.4405	5.30483	32.916	9.62e-09	1.39e-06	5.85796	Down
Igfals	-15.6199	5.48416	32.0421	1.51e-08	2.09e-06	5.6797	Down
Tm2d2	-15.374	5.23839	31.7303	1.77e-08	2.36e-06	5.6264	Down
Gdap1	17.1205	6.98415	31.1758	2.36e-08	3.03e-06	5.51815	Up
Tubb1;Tubb2a;Tubb3;Tubb4a;Tubb4b;Tubb5;Tubb6	-17.1109	6.97455	30.8726	2.76e-08	3.31e-06	5.48012	Down
Impdh1;Impdh2	-15.3476	5.21202	30.8107	2.84e-08	3.31e-06	5.48012	Down
Hapln4	17.323	7.18664	30.8082	2.85e-08	3.31e-06	5.48012	Up
Myh10;Myh11	-15.261	5.1255	30.6531	3.09e-08	3.47e-06	5.45919	Down
Abcb1b;Abcb6	-15.4793	5.34359	30.231	3.84e-08	4.19e-06	5.37806	Down
Fgfr1;Fyn;Hck;Lyn;Yes1	-16.9373	6.80102	29.7707	4.86e-08	5.15e-06	5.28793	Down
Lox	-15.3403	5.20469	28.8519	7.81e-08	8.04e-06	5.09459	Down
Fbn1;Fbn2	-15.2304	5.09487	28.511	9.32e-08	9.32e-06	5.03036	Down
Pik3c2g	-17.1414	7.00503	28.434	9.69e-08	9.44e-06	5.025	Down
Tmem176b	-5.0957	9.81966	27.952	1.24e-07	1.18e-05	4.92844	Down
Cul4a;Cul4b	-15.0583	4.92294	27.4042	1.65e-07	1.53e-05	4.81672	Down
Scamp4	-15.2548	5.11934	26.9183	2.12e-07	1.91e-05	4.71856	Down
Kit;Mapk1;Mapk3;Pdgfrb	-16.3905	6.25435	26.7542	2.31e-07	2.03e-05	4.69242	Down
Ifitm2;Ifitm3	-5.11344	8.42109	26.5515	2.57e-07	2.2e-05	4.65731	Down
Rab10;Rab14;Rab39b;Rab3a;Rab8a;Rab8b	-16.6509	6.51464	26.2356	3.02e-07	2.53e-05	4.59651	Down
Actb;Actbl2	-5.46112	12.9868	26.098	3.25e-07	2.66e-05	4.57555	Down
Yap1	-16.2365	6.10048	25.8992	3.6e-07	2.88e-05	4.54058	Down
Tmem198b	-14.9849	4.84964	25.7458	3.89e-07	3e-05	4.5224	Down
Tmed4;Tmed9	-15.0077	4.8724	25.7344	3.92e-07	3e-05	4.5224	Down
Acvr1b;Tgfbr1	-14.9301	4.79493	24.9438	5.9e-07	4.43e-05	4.35354	Down
Nmral1	-14.9019	4.76672	24.8635	6.15e-07	4.52e-05	4.34441	Down
Fmod	-14.9041	4.76888	24.7372	6.57e-07	4.73e-05	4.32471	Down
Igf1r;Insr	-14.8621	4.72698	24.5545	7.22e-07	5.1e-05	4.29214	Down
Dpt	-14.9031	4.76787	24.4672	7.56e-07	5.24e-05	4.28091	Down
Lect2	-14.916	4.78077	24.0587	9.34e-07	6.24e-05	4.20489	Down
Dcxr	-15.0571	4.92178	24.0574	9.35e-07	6.24e-05	4.20489	Down
Gbe1	-14.8171	4.68202	23.6964	1.13e-06	7.39e-05	4.13143	Down
Cfap20	-14.7867	4.65168	23.4847	1.26e-06	8.08e-05	4.09257	Down
Ptpmt1	-14.8239	4.68882	23.4555	1.28e-06	8.08e-05	4.09257	Down
Mob4	-14.7982	4.66309	23.4062	1.31e-06	8.15e-05	4.08897	Down
Mlana	-8.39919	10.7873	23.1472	1.5e-06	9.16e-05	4.03792	Down
Chmp1b2	-16.061	5.92501	23.0826	1.55e-06	9.32e-05	4.03062	Down
Ldlrad3	-15.7272	5.59135	22.0729	2.62e-06	0.000155039	3.80956	Down
Ptk7	-14.6517	4.5168	21.8754	2.91e-06	0.000169073	3.77193	Down
Ephx2	-15.7277	5.59186	21.437	3.66e-06	0.00020911	3.67963	Down
Phf5a	-14.5255	4.39078	20.4132	6.24e-06	0.000351277	3.45435	Down
Eml6	-15.4619	5.32622	20.3257	6.53e-06	0.000362062	3.44122	Down
Ubac2	-5.60223	10.7915	20.2856	6.67e-06	0.000364132	3.43874	Down
Pxdn	-14.5335	4.39874	20.1679	7.09e-06	0.000381455	3.41856	Down
Ywhag;Ywhah	-15.4971	5.36139	19.9149	8.1e-06	0.000429013	3.36753	Down
Hbb-b2;Hbb-y	-4.71348	12.825	19.8016	8.59e-06	0.000448595	3.34815	Down
Relt	-14.4997	4.36495	19.6979	9.07e-06	0.000466857	3.33082	Down
Urod	-14.4856	4.35094	19.4838	1.01e-05	0.000510895	3.29167	Down
Pklr	-14.5371	4.4023	19.4718	1.02e-05	0.000510895	3.29167	Down
Ppp1r18	-14.4661	4.33145	19.4252	1.05e-05	0.000516348	3.28706	Down
Praf2	-14.4806	4.34589	19.2169	1.17e-05	0.000568091	3.24558	Down
Retreg3	-14.3808	4.24625	18.4094	1.78e-05	0.00085036	3.0704	Down
Ubqln2	-14.3609	4.22643	18.3967	1.79e-05	0.00085036	3.0704	Down
Pmel	-15.2288	5.09329	18.3022	1.88e-05	0.000881992	3.05454	Down
Vnn1	-4.40092	8.63993	17.9814	2.23e-05	0.00103042	2.98698	Down
Snrpd2	-14.2855	4.15108	17.3909	3.04e-05	0.00138689	2.85796	Down
Casp3	-14.2777	4.14327	17.3682	3.08e-05	0.00138689	2.85796	Down
Pcdhgb7	-14.2835	4.14911	17.2626	3.26e-05	0.00144803	2.83922	Down
Chmp1b1	-15.1188	4.9834	16.8451	4.06e-05	0.00176227	2.75393	Down
Pfkl;Pfkp	-15.0206	4.88527	16.8433	4.06e-05	0.00176227	2.75393	Down
Ptgr2	-14.2214	4.08706	16.7771	4.2e-05	0.00178606	2.7481	Down
Trmt112	-14.2299	4.09554	16.7727	4.21e-05	0.00178606	2.7481	Down
Slc7a5;Slc7a6	-14.9953	4.86004	16.6972	4.38e-05	0.00183697	2.7359	Down
Cobll1	-14.1722	4.03796	16.3929	5.15e-05	0.00213183	2.67125	Down
Mpp2;Mpp6	-14.9021	4.76694	16.0588	6.14e-05	0.00251418	2.5996	Down
Sema3c	-14.157	4.02277	15.9976	6.34e-05	0.00256759	2.59047	Down
Mgat2	-14.158	4.02381	15.9277	6.58e-05	0.00263451	2.5793	Down
Cnbp	-14.1	3.96589	15.6881	7.47e-05	0.00295728	2.52911	Down
Clcn7	-14.0672	3.93313	15.598	7.83e-05	0.00306791	2.51316	Down
Gnpda1;Gnpda2	-14.0566	3.92261	15.5192	8.17e-05	0.00316412	2.49975	Down
C1qc	-8.46268	8.25983	15.4755	8.36e-05	0.00320366	2.49435	Down
Pfdn2	-14.0527	3.91871	15.3951	8.72e-05	0.00330778	2.48046	Down
Col18a1	-14.0819	3.94788	15.2962	9.19e-05	0.00344917	2.46229	Down
Mat1a;Mat2a	-14.8034	4.66835	15.1311	0.0001003	0.00372557	2.42881	Down
Kif2a;Kif2c	-14.7383	4.60329	15.0632	0.000103968	0.00382242	2.41766	Down
Glul	-13.9777	3.84388	14.8416	0.000116926	0.00425539	2.37106	Down
Acan	-14.0728	3.93875	14.8013	0.000119452	0.00430298	2.36623	Down
Src;Yes1	-14.6944	4.55949	14.7829	0.000120622	0.00430298	2.36623	Down
Snx12	-14.6898	4.55487	14.7419	0.000123278	0.0043546	2.36105	Down
Marchf3	-14.6437	4.50875	14.499	0.000140231	0.00489111	2.31059	Down
Khsrp	-13.939	3.80522	14.4863	0.000141181	0.00489111	2.31059	Down
Faah	-14.6257	4.49083	14.275	0.00015795	0.00541993	2.26601	Down
Emc2	-13.8973	3.76361	14.142	0.000169513	0.00576183	2.23944	Down
Nedd4;Nedd4l	-14.5669	4.43207	14.0153	0.000181329	0.00610586	2.21425	Down
Pygb;Pygl	-14.6482	4.5133	13.8909	0.000193733	0.00646315	2.18956	Down
Gamt	-14.5277	4.39292	13.7957	0.000203806	0.00673683	2.17154	Down
Tmc5	-6.57909	12.4097	13.7534	0.000208439	0.00682734	2.16575	Down
Bola2	-13.8404	3.70681	13.6941	0.000215127	0.00697506	2.15645	Down
B4galt1	-13.835	3.70147	13.6794	0.000216821	0.00697506	2.15645	Down
Pbdc1	-13.8225	3.68892	13.6017	0.000225978	0.00715158	2.1456	Down
Lss	-13.823	3.68948	13.5992	0.000226278	0.00715158	2.1456	Down
Ecm1	-7.69223	7.8554	13.5053	0.000237886	0.00745306	2.12767	Down
Coro2b	-13.8186	3.68505	13.4841	0.000240589	0.00747279	2.12652	Down
Tubb4a;Tubb4b;Tubb5	-8.11833	8.53071	13.425	0.00024829	0.00764605	2.11656	Down
Tubg1	-14.4761	4.34146	13.3562	0.000257575	0.00784755	2.10527	Down
Pcmt1	-13.7842	3.65068	13.3444	0.000259189	0.00784755	2.10527	Down
Cpne2;Cpne3;Cpne4	-13.8088	3.67526	13.3216	0.000262368	0.0078776	2.10361	Down
Krt14;Krt17;Krt42	-4.92676	8.90317	13.1271	0.000291057	0.00866677	2.06214	Down
Eef2k	-13.7474	3.61399	13.0956	0.000295995	0.00874155	2.05841	Down
Cdipt	-13.728	3.59464	12.9427	0.000321174	0.00940804	2.0265	Down
Pltp	-13.7357	3.60236	12.9079	0.000327206	0.00950743	2.02194	Down
Nolc1	-13.7035	3.57023	12.7791	0.000350517	0.0101033	1.99554	Down
Cope	-14.3564	4.22188	12.7243	0.000360936	0.0103171	1.98644	Down
Pdia6	-13.6818	3.54861	12.7102	0.000363662	0.0103171	1.98644	Down
Smad3	-13.646	3.51289	12.5483	0.000396564	0.0111627	1.95223	Down
Bin3	-13.6221	3.48899	12.4176	0.000425308	0.011879	1.92522	Down
Myadm	-7.17824	7.44446	12.0398	0.000520755	0.0143462	1.84326	Down
Dad1	-13.5744	3.44144	12.0368	0.000521609	0.0143462	1.84326	Down
Aph1c	-13.5799	3.44694	11.9635	0.000542518	0.0148083	1.8295	Down
Gprc5b	-13.5726	3.43967	11.8544	0.000575253	0.0154712	1.81048	Down
Slc22a21;Slc22a5	-13.6393	3.50614	11.8539	0.000575394	0.0154712	1.81048	Down
Tesl1	-13.5228	3.38996	11.736	0.00061302	0.0163608	1.7862	Down
Mmp2	-14.1653	4.03105	11.5714	0.00066974	0.0177432	1.75097	Down
Egfl7	-13.4887	3.35599	11.5437	0.000679777	0.0178777	1.74769	Down
Pglyrp2	-13.5177	3.38491	11.4942	0.00069812	0.018227	1.73928	Down
Gnb1;Gnb2;Gnb3	-7.28261	7.21081	11.4604	0.000710934	0.0183223	1.73702	Down
Prcp	-13.4951	3.36236	11.4578	0.000711941	0.0183223	1.73702	Down
Ube2d1;Ube2d3	-7.75528	6.81758	11.4178	0.000727448	0.0185886	1.73075	Down
Ppp4c	-13.4633	3.33066	11.3966	0.000735805	0.0186698	1.72886	Down
Tmem33	-13.4785	3.34575	11.324	0.00076512	0.0192426	1.71574	Down
Srprb	-13.4108	3.27824	11.3144	0.000769064	0.0192426	1.71574	Down
Psrc1	-13.3311	3.19877	11.0523	0.000885756	0.0218753	1.66005	Down
Bcat1	-13.3802	3.24778	11.0419	0.000890755	0.0218753	1.66005	Down
Dnmt1	-13.3707	3.23828	11.0383	0.000892499	0.0218753	1.66005	Down
Scrn2	-14.036	3.90203	10.9717	0.000925135	0.022522	1.64739	Down
Rabep1	-13.3212	3.18891	10.9509	0.000935603	0.022542	1.64701	Down
Eif4g3	-13.3468	3.21444	10.9432	0.000939492	0.022542	1.64701	Down
Slc9a3r2	-13.2948	3.16258	10.9329	0.000944724	0.022542	1.64701	Down
Plekha1	-13.3906	3.25813	10.8821	0.000970993	0.0230164	1.63796	Down
Qsox1	-14.0114	3.87751	10.8195	0.00100436	0.0236517	1.62614	Down
Mfsd14b	-13.3287	3.1964	10.7159	0.00106221	0.0248348	1.60494	Down
Ints6	2.80744	9.71379	10.695	0.00107423	0.0248348	1.60494	Up
Cdk1;Cdk15;Cdk17;Cdk2;Cdk4;Cdk5	-5.6727	6.21303	10.6932	0.00107528	0.0248348	1.60494	Down
Osbpl9	-13.1136	2.98195	10.5214	0.00117999	0.0270795	1.56736	Down
Adipoq	-4.16135	7.06265	10.4455	0.0012295	0.0280374	1.55226	Down
Tubb1;Tubb2a;Tubb2b;Tubb3;Tubb4a;Tubb4b;Tubb5;Tubb6	-3.70759	7.51185	10.4064	0.0012558	0.028457	1.54581	Down
Tmtc3	-13.9289	3.79512	10.3407	0.00130126	0.0292274	1.53421	Down
Cyth1;Cyth2;Cyth3	-13.0655	2.93409	10.334	0.00130603	0.0292274	1.53421	Down
Apoe	-2.75432	12.8435	10.284	0.00134191	0.029845	1.52513	Down
Sec62	-12.9424	2.81139	10.1232	0.00146417	0.0323053	1.49073	Down
Triobp	-12.9451	2.81412	10.1121	0.00147303	0.0323053	1.49073	Down
Ppp2cb	-13.0467	2.91535	10.1041	0.00147942	0.0323053	1.49073	Down
Mdk	-12.9681	2.83698	10.0786	0.00150004	0.0325581	1.48734	Down
H2ac11;H2ac12;H2ac13;H2ac15;H2ac20;H2ac4;H2ac6;H2ac7;H2ac8;H2aj;H2aw;H2az1;H2az2;Hist1h2af;Hist1h2an;Hist1h2ao;Hist1h2ap;Hist2h2aa1	-5.27809	9.01706	10.0581	0.00151679	0.0327245	1.48513	Down
Snap47	-12.9194	2.78853	10.0134	0.00155406	0.033329	1.47718	Down
Chsy1	-13.822	3.68848	9.8833	0.00166785	0.0355579	1.44906	Down
Mxra8	-12.8547	2.72414	9.86054	0.00168861	0.0357886	1.44625	Down
Pum2	-12.8296	2.69911	9.82031	0.00172595	0.0363661	1.4393	Down
Mmp12	-13.7976	3.66408	9.76729	0.00177644	0.0370692	1.43099	Down
Wnt5a;Wnt5b	-12.7945	2.66419	9.76372	0.0017799	0.0370692	1.43099	Down
Eef2;Eftud2	-6.83677	8.50424	9.65864	0.00188464	0.039025	1.40866	Down
Epha4	-13.7994	3.66586	9.64214	0.00190163	0.0391519	1.40725	Down
Pde12	-12.7786	2.64824	9.59545	0.00195061	0.039932	1.39868	Down
Lrrc58	-12.8049	2.67446	9.50895	0.00204472	0.0412947	1.38411	Down
St8sia4	-12.6838	2.55403	9.50856	0.00204516	0.0412947	1.38411	Down
Abhd14b	-13.7325	3.59911	9.50283	0.00205155	0.0412947	1.38411	Down
Zc3hav1	-13.7216	3.58823	9.4545	0.00210631	0.0421261	1.37545	Down
Nup35	-12.587	2.45763	9.44102	0.00212185	0.0421261	1.37545	Down
H2ac11;H2ac12;H2ac13;H2ac15;H2ac4;H2ac6;H2ac7;H2ac8;H2aj;H2aw;Hist1h2af;Hist1h2an;Hist1h2ao;Hist1h2ap	-6.9879	6.15135	9.43577	0.00212794	0.0421261	1.37545	Down
Polr2e	-12.661	2.53118	9.40874	0.00215953	0.042518	1.37143	Down
Pip4k2c	-12.526	2.39693	9.38319	0.00218984	0.0428247	1.36831	Down
Gchfr	-12.5763	2.44697	9.37564	0.00219888	0.0428247	1.36831	Down
Fxr2	-13.6906	3.55731	9.35115	0.00222846	0.0431674	1.36484	Down
Pear1	13.6732	3.53992	9.24705	0.00235876	0.0454471	1.34249	Up
Cnot1	-12.5417	2.41262	9.2194	0.00239463	0.0457971	1.33916	Down
Ddr1;Ddr2	-6.41595	7.78556	9.20436	0.0024144	0.0457971	1.33916	Down
Bclaf1	-12.3982	2.26991	9.20386	0.00241506	0.0457971	1.33916	Down
Mdfi	-13.6455	3.51231	9.1886	0.00243527	0.0459386	1.33782	Down
Pigk	-12.285	2.1573	9.16941	0.00246094	0.0461811	1.33554	Down
Gtpbp1	-12.2767	2.14906	9.13688	0.00250507	0.0467657	1.33007	Down
Tbc1d10a	-12.2274	2.10009	9.0022	0.00269655	0.0500807	1.30033	Down
Cyfip2	-12.1585	2.03169	8.9659	0.00275064	0.0507976	1.29416	Down
Kif1c	-12.0966	1.97023	8.9496	0.00277531	0.0507976	1.29416	Down
Fbp2	-6.47903	6.29497	8.9376	0.00279359	0.0507976	1.29416	Down
Cog1	-12.073	1.94675	8.93304	0.00280057	0.0507976	1.29416	Down
Ehd1;Ehd2	-4.68304	7.87763	8.92844	0.00280764	0.0507976	1.29416	Down
Gstt3	-12.1229	1.99635	8.90959	0.00283678	0.0507976	1.29416	Down
Jagn1	-11.9651	1.83956	8.90472	0.00284435	0.0507976	1.29416	Down
Etfb	-12.2277	2.10045	8.90242	0.00284793	0.0507976	1.29416	Down
Srek1	-11.6044	1.48201	8.73295	0.0031251	0.055055	1.2592	Down
Jam2	-11.9032	1.77821	8.73011	0.00312997	0.055055	1.2592	Down
Abhd12	-11.8998	1.77487	8.72866	0.00313247	0.055055	1.2592	Down
Cog3	-11.5398	1.41817	8.70381	0.00317546	0.055518	1.25557	Down
Pip4k2b	-11.7267	1.60323	8.69569	0.00318963	0.055518	1.25557	Down
Alyref;Alyref2	-13.5362	3.40331	8.67846	0.00321993	0.0557759	1.25355	Down
Rrp12	-11.9262	1.80113	8.62098	0.00332314	0.0572883	1.24193	Down
Esyt1	-11.3101	1.19107	8.58965	0.0033808	0.0580048	1.23654	Down
Hic2	-3.41968	11.1067	8.54714	0.00346065	0.0590935	1.22846	Down
Cops8	-13.484	3.35125	8.52045	0.00351177	0.0596835	1.22415	Down
Pitpna;Pitpnb	-13.3962	3.26371	8.31755	0.00392638	0.0664166	1.17772	Down
Grhpr	-13.3728	3.24042	8.21741	0.00414904	0.0695346	1.1578	Down
Ubxn1	-13.3408	3.20845	8.21729	0.0041493	0.0695346	1.1578	Down
Rpl22l1	-13.3427	3.21038	8.19731	0.00419526	0.0698383	1.15591	Down
Pdxk	-13.3503	3.21796	8.19259	0.00420619	0.0698383	1.15591	Down
Rab34	-13.3046	3.17236	8.16736	0.00426508	0.0704913	1.15186	Down
Atg9a	-13.2757	3.14351	8.10636	0.00441101	0.0725702	1.13924	Down
Tpm3	-13.2577	3.12564	8.09502	0.00443872	0.0726582	1.13872	Down
Mylk	-13.2681	3.13592	8.07953	0.0044768	0.0726582	1.13872	Down
Evc2	-13.2528	3.12073	8.06072	0.00452352	0.0726582	1.13872	Down
Notch1;Notch2	-13.2629	3.13087	8.05734	0.00453196	0.0726582	1.13872	Down
Acbd3	-13.423	3.29048	8.05555	0.00453644	0.0726582	1.13872	Down
Peg10	-13.352	3.21955	8.05519	0.00453736	0.0726582	1.13872	Down
Fzd2;Fzd7	-6.06389	8.60948	8.02165	0.00462216	0.0736702	1.13271	Down
Pik3r1;Plcg2	-13.2414	3.10941	8.0141	0.00464145	0.0736702	1.13271	Down
Thbs3;Thbs4	-6.4751	5.92649	7.99142	0.00469997	0.0742718	1.12918	Down
Ptprd;Ptprf;Ptprs	-5.99258	8.73157	7.96565	0.00476735	0.0748679	1.1257	Down
Actl6a	-13.1821	3.05028	7.96114	0.00477924	0.0748679	1.1257	Down
Zc3hav1l	-13.1608	3.02909	7.90489	0.00493013	0.0768972	1.11409	Down
Lsm5	-13.1608	3.02901	7.89208	0.00496518	0.07711	1.11289	Down
Mat2b	-13.1457	3.01403	7.85487	0.00506839	0.0783751	1.10582	Down
Ifrd2	-13.1068	2.97526	7.83115	0.00513534	0.079071	1.10198	Down
Mob2	-13.0999	2.96842	7.76566	0.00532488	0.0814462	1.08913	Down
Ttyh2	-2.17702	11.1017	7.7623	0.00533481	0.0814462	1.08913	Down
Neto2	-13.0673	2.93596	7.73488	0.00541641	0.0823432	1.08437	Down
Fbxl17	-12.9803	2.84915	7.62426	0.00575882	0.0871808	1.05958	Down
Lclat1	-12.9423	2.81133	7.60832	0.00580997	0.0875872	1.05756	Down
Csnk1g2	-12.9734	2.84228	7.56491	0.00595156	0.0893479	1.04892	Down
Lfng	-12.9076	2.77681	7.53977	0.00603518	0.0902272	1.04466	Down
Snrpb2	-12.9136	2.78282	7.5116	0.00613028	0.0911633	1.04018	Down
Deptor	-12.901	2.7702	7.50629	0.0061484	0.0911633	1.04018	Down
Ppp1cb;Ppp1cc	12.8579	2.72732	7.46991	0.00627386	0.0926423	1.03319	Up
Tyrp1	-2.1377	13.7374	7.4068	0.00649779	0.0954066	1.02042	Down
Fam171a2	-12.8429	2.71233	7.40231	0.00651402	0.0954066	1.02042	Down
Tab1	-12.8527	2.72202	7.38159	0.00658947	0.0961209	1.01718	Down
Slc25a3	-12.8525	2.72181	7.3707	0.0066295	0.0963149	1.01631	Down
Rela	-12.7918	2.66147	7.3384	0.00674969	0.0976672	1.01025	Down
Wdr26	-12.928	2.79719	7.32283	0.0068084	0.0981227	1.00823	Down
Nop2	-12.6924	2.56258	7.23497	0.0071497	0.10258	0.988936	Down
Eif4b	-12.6872	2.55733	7.22872	0.00717464	0.10258	0.988936	Down
Ddx49	-12.7156	2.58565	7.21411	0.00723326	0.10301	0.987122	Down
Sdcbp2	-12.6527	2.52295	7.19397	0.00731491	0.103762	0.983961	Down
Git1	-12.5993	2.46987	7.15828	0.00746187	0.105281	0.977648	Down
Anapc1	-12.6104	2.48095	7.15382	0.00748044	0.105281	0.977648	Down
Otud6b	-12.6296	2.50001	7.14242	0.00752816	0.105541	0.97658	Down
Usp10	-12.5855	2.45608	7.12446	0.00760394	0.10619	0.973917	Down
Lyz1	-12.5673	2.43796	7.11519	0.00764336	0.106328	0.973351	Down
Gde1	-12.5485	2.41934	7.09914	0.0077121	0.106872	0.971137	Down
Nmt2	-12.5321	2.4031	7.06051	0.00788014	0.108782	0.963442	Down
Nagk	-12.4829	2.35417	7.0371	0.00798384	0.109793	0.959425	Down
Rpf2	-12.3994	2.27101	7.01616	0.00807772	0.110236	0.957676	Down
Ltbr	-12.4001	2.27171	7.01056	0.00810302	0.110236	0.957676	Down
Mta1;Mta2;Mta3	-12.3752	2.247	7.0095	0.00810785	0.110236	0.957676	Down
Gpsm1	-12.3692	2.24105	6.99797	0.00816022	0.110531	0.956515	Down
EEF1AKNMT	-12.3555	2.22737	6.9879	0.00820627	0.110739	0.955701	Down
Hectd1	-12.3278	2.19997	6.96897	0.00829351	0.111498	0.952732	Down
Ddx56	-12.2613	2.13376	6.9372	0.00844212	0.113019	0.94685	Down
Pkdcc	-12.3461	2.21801	6.9306	0.00847333	0.113019	0.94685	Down
Rcn1	-12.3208	2.19303	6.9204	0.00852181	0.113019	0.94685	Down
Pik3c3	-12.2019	2.07474	6.91724	0.00853685	0.113019	0.94685	Down
Capn15	-12.1756	2.04875	6.91168	0.00856345	0.113019	0.94685	Down
Rbms1;Rbms3	-12.1608	2.03398	6.90445	0.00859814	0.113062	0.946682	Down
Slc1a3	-12.2554	2.12777	6.89671	0.00863543	0.11314	0.946384	Down
Gnl1	-12.14	2.01329	6.8742	0.0087449	0.113808	0.943826	Down
Ptprk	-12.1918	2.06463	6.8545	0.00884181	0.113808	0.943826	Down
Vps52	-12.0815	1.95524	6.84919	0.00886816	0.113808	0.943826	Down
Cpa1	-5.34266	7.20687	6.84621	0.00888295	0.113808	0.943826	Down
Ermp1	-12.0916	1.9652	6.83566	0.00893558	0.113808	0.943826	Down
Olfr164	2.54464	7.43925	6.83171	0.00895535	0.113808	0.943826	Up
Dmd	-12.2151	2.08798	6.82552	0.00898641	0.113808	0.943826	Down
Arih1	-12.0434	1.91729	6.81574	0.00903579	0.113808	0.943826	Down
Rps6ka2	-12.1709	2.04401	6.81135	0.00905804	0.113808	0.943826	Down
Frg1	-12.0867	1.96037	6.81097	0.00905994	0.113808	0.943826	Down
Tgfb1i1	-12.0431	1.91703	6.80808	0.00907463	0.113808	0.943826	Down
Wdr77	-12.03	1.90416	6.80094	0.009111	0.113808	0.943826	Down
Ube4b	-12.1316	2.00502	6.79542	0.00913922	0.113808	0.943826	Down
Strn;Strn3	-12.0289	1.90305	6.79328	0.00915016	0.113808	0.943826	Down
Ankrd40	-11.9756	1.85009	6.78533	0.00919102	0.113808	0.943826	Down
Hspg2	-2.30767	11.7135	6.78516	0.00919186	0.113808	0.943826	Down
Zfand2b	-12.2841	2.15655	6.7481	0.00938476	0.115799	0.936295	Down
Cuedc1	-11.9693	1.84393	6.73548	0.0094514	0.116223	0.934707	Down
Uvrag	-11.8004	1.67637	6.68211	0.00973854	0.11907	0.924197	Down
Pip4k2a	-11.9186	1.79336	6.67336	0.00978648	0.11907	0.924197	Down
Olfr299	-5.35561	7.3376	6.66736	0.00981944	0.11907	0.924197	Down
Impdh1	-11.774	1.65012	6.66234	0.00984713	0.11907	0.924197	Down
Insc	-11.7656	1.64178	6.65196	0.00990466	0.11907	0.924197	Down
Chek1	-11.7292	1.60581	6.6517	0.0099061	0.11907	0.924197	Down
H3c1;H3c2	-2.2164	11.1837	6.64654	0.00993485	0.11907	0.924197	Down
Yipf5	-11.8718	1.74717	6.64431	0.00994729	0.11907	0.924197	Down
Ddx47	-11.6776	1.55472	6.61751	0.0100981	0.120203	0.920084	Down
Rpp30	-11.7382	1.61479	6.61564	0.0101087	0.120203	0.920084	Down
Larp7	-11.3757	1.25582	6.57629	0.0103346	0.122485	0.911915	Down
Cul7	-11.2767	1.15808	6.55533	0.0104571	0.123531	0.908226	Down
Rpe	-11.3137	1.19459	6.54526	0.0105164	0.123752	0.907449	Down
Mcoln2	-11.738	1.61461	6.54051	0.0105445	0.123752	0.907449	Down
G3bp2	-11.2562	1.13781	6.53281	0.0105902	0.123885	0.90698	Down
Prss12	-11.063	0.947203	6.49196	0.0108363	0.124483	0.90489	Down
Plxdc2	-11.39	1.27015	6.49141	0.0108397	0.124483	0.90489	Down
Parg	-11.2225	1.1047	6.48988	0.010849	0.124483	0.90489	Down
Ncbp1	-11.1661	1.04887	6.48564	0.010875	0.124483	0.90489	Down
Dhrs4	-11.2178	1.09982	6.47796	0.0109221	0.124483	0.90489	Down
Kiaa2013	-11.003	0.887978	6.47673	0.0109296	0.124483	0.90489	Down
Ccz1	-11.1661	1.04888	6.47657	0.0109306	0.124483	0.90489	Down
Rnf7	-11.1838	1.06627	6.47278	0.0109539	0.124483	0.90489	Down
Cpox	-11.3236	1.20457	6.47257	0.0109552	0.124483	0.90489	Down
Eif1ad	-11.1738	1.05646	6.46744	0.0109868	0.124483	0.90489	Down
Rab10;Rab14;Rab8a;Rab8b	-11.0067	0.891569	6.45669	0.0110535	0.124668	0.904246	Down
Ncdn	-10.5907	0.482968	6.44228	0.0111436	0.124668	0.904246	Down
Notch1;Notch3	-11.2337	1.11583	6.44224	0.0111438	0.124668	0.904246	Down
Pafah1b2	10.2721	0.171592	6.44141	0.011149	0.124668	0.904246	Up
Vps51	-10.4411	0.336387	6.42823	0.011232	0.124668	0.904246	Down
Eppk1;Plec	-10.3833	0.279623	6.42759	0.0112361	0.124668	0.904246	Down
Smarcb1	-10.441	0.336399	6.42613	0.0112454	0.124668	0.904246	Down
Col11a1;Col5a1	-10.9813	0.866437	6.40353	0.0113893	0.125877	0.900055	Down
Igfbp6	-5.95015	5.46315	6.3393	0.0118092	0.130117	0.885664	Down
Krt14;Krt16;Krt17;Krt20;Krt42	-5.93742	5.92324	6.33349	0.0118479	0.130146	0.885569	Down
Hbb-b2	-2.02057	12.5844	6.25303	0.0123981	0.135777	0.867175	Down
F10	-4.01885	9.413	6.21922	0.0126371	0.137974	0.860203	Down
Gna11;Gna12;Gna13;Gna14;Gnaq	-5.10819	8.25736	6.056	0.0138591	0.150859	0.821429	Down
Epha3;Epha4	-3.94895	8.78566	5.88054	0.0153091	0.166141	0.779523	Down
Rpl19	-2.09229	9.3968	5.85402	0.0155415	0.168157	0.774286	Down
Lmbrd1	-5.0007	6.65762	5.82679	0.0157839	0.170268	0.768868	Down
Tubb2a;Tubb2b;Tubb3;Tubb4a;Tubb4b;Tubb5	-3.79074	7.35867	5.72679	0.016708	0.179698	0.745457	Down
Tubb2a;Tubb2b;Tubb3;Tubb4a;Tubb4b;Tubb5;Tubb6	-2.14754	11.5508	5.71034	0.0168652	0.180849	0.742683	Down
Fgb	-1.87631	12.6212	5.67813	0.0171777	0.183653	0.736001	Down
Aoc2;Aoc3	-5.13827	5.8843	5.59963	0.0179643	0.191495	0.717842	Down
Krt5;Krt6a;Krt76	-6.26083	7.07292	5.44964	0.0195723	0.208021	0.681893	Down
Prdx4	-3.77137	8.71771	5.38181	0.0203477	0.215626	0.666299	Down
Lhfpl2	2.05233	7.859	5.3105	0.0211973	0.22397	0.64981	Up
Col4a3	-6.81499	5.1813	5.15609	0.023165	0.244046	0.612529	Down
Psen2	-5.52293	5.03427	5.09917	0.0239373	0.251039	0.600258	Down
Hsp90ab1;Hsp90b1	-2.61266	9.02507	5.09693	0.0239682	0.251039	0.600258	Down
Pzp	1.5666	12.7875	5.01537	0.0251232	0.262374	0.581079	Up
Ywhab;Ywhaq;Ywhaz	-4.51812	7.94523	4.83216	0.0279336	0.290881	0.536284	Down
Kctd12	-4.83436	5.66136	4.79525	0.0285383	0.296321	0.528237	Down
Shisa4	-3.33558	8.06722	4.73786	0.0295058	0.305487	0.515008	Down
Serinc5	-4.5627	6.15676	4.69447	0.0302598	0.312395	0.505295	Down
Papln	-3.47749	6.50294	4.65385	0.0309841	0.318959	0.496265	Down
Apold1	-2.02113	7.2689	4.63161	0.0313881	0.322198	0.491877	Down
Slc19a1	-6.03766	4.3706	4.59886	0.0319932	0.327476	0.484821	Down
Dnajc5	2.54338	6.48982	4.59298	0.0321031	0.32767	0.484563	Up
Rpl27a	-1.7207	9.92617	4.47676	0.0343589	0.349703	0.4563	Down
Gng5	2.01909	7.23035	4.42248	0.0354684	0.359979	0.443723	Up
Dcp1a	1.76998	8.49236	4.34735	0.0370665	0.375142	0.425804	Up
Tubb2a;Tubb3;Tubb4a;Tubb4b;Tubb5	-4.2971	6.44545	4.31229	0.0378379	0.381877	0.418077	Down
Rnf128	-4.39108	5.97197	4.23477	0.039604	0.398584	0.39948	Down
Mpo	-5.05428	4.94714	4.12527	0.0422472	0.424002	0.372632	Down
Ldha;Ldhb	-4.24542	9.1925	4.07292	0.0435758	0.436121	0.360393	Down
Emilin1	-1.79828	8.18429	4.04784	0.0442279	0.441421	0.355147	Down
Zfyve21	3.4262	6.08026	3.97655	0.0461379	0.459212	0.337987	Up
Lrrc1;Scrib	-3.60993	5.51741	3.94031	0.047142	0.467914	0.329834	Down
Fmr1;Fxr1;Fxr2	-4.07089	6.80696	3.90605	0.0481124	0.476234	0.32218	Down
Frrs1	-4.14283	6.12673	3.87234	0.049088	0.484559	0.314653	Down
Amy1	-4.75491	5.04821	3.82762	0.0504145	0.496294	0.304261	Down
Serpind1	-5.12866	8.4475	3.7956	0.0513875	0.504493	0.297145	Down
Rffl	-4.31757	4.51082	3.77513	0.0520199	0.509315	0.293014	Down
Tinagl1	-1.57245	9.46116	3.73106	0.0534094	0.521502	0.282744	Down
Krt2	1.67645	9.60824	3.66572	0.0555426	0.540864	0.266912	Up
Syne1	-1.57968	9.1065	3.58027	0.0584698	0.567835	0.245778	Down
Trap1	-5.31619	8.41631	3.56909	0.0588646	0.570132	0.244025	Down
Actb	-1.68914	12.9661	3.53931	0.0599304	0.578898	0.237398	Down
Tuba1c;Tuba4a	-1.48958	10.9988	3.48831	0.0618035	0.595136	0.225384	None
Angptl2;Angptl6	-3.71169	7.03649	3.48106	0.0620748	0.595136	0.225384	Down
Lrg1	-3.8041	6.77958	3.48021	0.0621068	0.595136	0.225384	Down
Mfap2	-4.61162	4.81471	3.46635	0.0626293	0.59855	0.222899	Down
Comp	-1.61947	8.90633	3.42184	0.0643391	0.612255	0.213068	Down
Angptl2	-1.47145	10.6987	3.4202	0.0644032	0.612255	0.213068	None
Rab27a;Rab27b	-3.75811	6.26181	3.31625	0.068598	0.650417	0.186808	Down
Krt1;Krt2;Krt5;Krt6a;Krt72;Krt73;Krt76	-3.14601	7.27491	3.30447	0.0690918	0.65338	0.184834	Down
Col6a1	-1.53178	10.2989	3.27774	0.0702254	0.662362	0.178905	Down
Msn;Rdx	-1.71543	7.54358	3.26041	0.0709715	0.667651	0.175451	Down
Pdgfd	-3.80997	4.88935	3.22697	0.0724346	0.67964	0.167721	Down
Ighv2-5	-3.01039	9.51902	3.16813	0.0750881	0.702708	0.153225	Down
Lamb2	-1.44012	8.84156	3.16079	0.0754265	0.704046	0.152399	None
Fn1	-1.226	13.6859	3.11559	0.0775463	0.721962	0.141486	None
Rbp4	-2.65817	8.58178	3.08592	0.0789727	0.733347	0.134691	Down
Bhmt	-1.76274	9.12775	3.03258	0.0816081	0.755871	0.121552	Down
Cd34	-3.6357	5.91054	2.96543	0.0850619	0.784167	0.105591	Down
Cltb	1.41435	8.51185	2.96474	0.0850984	0.784167	0.105591	None
Psmb1	-1.71705	7.42713	2.90357	0.0883836	0.812362	0.0902502	Down
Stom	-1.3934	9.05975	2.88428	0.0894481	0.820055	0.0861572	None
Ctnnd1	-3.39955	4.87757	2.84463	0.0916798	0.838382	0.0765581	Down
Scarb2	1.50461	7.84597	2.8361	0.0921676	0.840709	0.0753545	Up
Gnai2;Gnai3;Gnao1	1.42138	9.74731	2.8264	0.092726	0.843666	0.0738292	None
Ctnna1;Ctnna2	-3.78638	5.30153	2.81028	0.0936618	0.850034	0.0705639	Down
Lrp10	1.55934	8.44177	2.73775	0.0980027	0.887195	0.0519809	Up
Pcbp1;Pcbp2;Pcbp4	1.33841	8.31556	2.71538	0.0993853	0.896041	0.047672	None
Prxl2b	-4.08886	4.7307	2.7139	0.0994772	0.896041	0.047672	Down
Ddx17;Ddx5	-1.84164	6.23468	2.65845	0.103001	0.921029	0.0357269	Down
Gnai2;Gnai3	1.34734	9.60843	2.6571	0.103088	0.921029	0.0357269	None
Lyar	1.97908	6.01491	2.65454	0.103254	0.921029	0.0357269	Up
Hnrnpf;Hnrnph1	-2.48008	6.89121	2.65424	0.103274	0.921029	0.0357269	Down
Gnb1;Gnb2;Gnb3;Gnb4	1.66424	11.8004	2.64195	0.104076	0.925891	0.0334401	Up
Krt10;Krt14;Krt16;Krt17;Krt42	-1.85807	10.7881	2.54097	0.110927	0.983853	0.00706974	Down
Glmp	-3.15042	7.19701	2.53797	0.111137	0.983853	0.00706974	Down
Pdcl3	1.30214	8.62538	2.48955	0.114604	0.999854	6.34e-05	None
Dip2c	-3.41164	5.61403	2.48519	0.114923	0.999854	6.34e-05	Down
Fbln1	-1.20993	10.9299	2.44527	0.117879	0.999854	6.34e-05	None
Hspa1l;Hspa2;Hspa8	-1.15389	13.4004	2.44262	0.118079	0.999854	6.34e-05	None
Nus1	1.68881	6.60768	2.41676	0.120043	0.999854	6.34e-05	Up
Pdcd6	-1.33228	9.72448	2.41364	0.120282	0.999854	6.34e-05	None
Plxna1;Plxna2;Plxna3	1.48652	9.19455	2.38066	0.122846	0.999854	6.34e-05	None
Tmx1	-3.34688	5.50131	2.33281	0.126673	0.999854	6.34e-05	Down
Stx12	1.25938	8.68345	2.33262	0.126689	0.999854	6.34e-05	None
Ca14	-1.43685	8.85806	2.31335	0.128267	0.999854	6.34e-05	None
Banf1	-2.2528	8.57801	2.306	0.128875	0.999854	6.34e-05	Down
Lamc1	-1.24239	8.94511	2.30269	0.12915	0.999854	6.34e-05	None
H1-2	-1.36621	7.86137	2.2941	0.129867	0.999854	6.34e-05	None
Tgoln1	1.42246	8.13246	2.2894	0.13026	0.999854	6.34e-05	None
Slc37a2	1.75246	6.34007	2.28682	0.130477	0.999854	6.34e-05	Up
Slc35b2	1.72345	6.4672	2.23623	0.134809	0.999854	6.34e-05	Up
Col6a3	-2.81797	5.44477	2.21477	0.136696	0.999854	6.34e-05	Down
Itch;Nedd4l	-1.44269	7.66543	2.20811	0.137287	0.999854	6.34e-05	None
Thbs4	-2.24952	7.99104	2.20473	0.137588	0.999854	6.34e-05	Down
Atp6v1e1	-1.57945	6.34292	2.19289	0.138649	0.999854	6.34e-05	Down
Mblac2	-3.28939	5.36628	2.19161	0.138764	0.999854	6.34e-05	Down
Igk-V19-17	-1.50288	7.92016	2.18593	0.139277	0.999854	6.34e-05	Down
Edil3	-1.11784	10.6798	2.17493	0.140276	0.999854	6.34e-05	None
Ephx1	1.32302	7.17467	2.14119	0.143391	0.999854	6.34e-05	None
Cyrib	1.6878	6.25263	2.13325	0.144135	0.999854	6.34e-05	Up
Col4a1	-3.02344	6.09806	2.12137	0.145257	0.999854	6.34e-05	Down
Ltf	-2.24244	9.89173	2.08429	0.148821	0.999854	6.34e-05	Down
Cfl1;Cfl2;Dstn	-1.4658	9.60555	2.06824	0.150395	0.999854	6.34e-05	None
Spns1	-1.75188	6.12874	2.05138	0.152069	0.999854	6.34e-05	Down
Tspan9	-1.18523	10.0829	2.01414	0.155839	0.999854	6.34e-05	None
Slc12a4;Slc12a7	-3.49242	7.24084	2.01397	0.155857	0.999854	6.34e-05	Down
Pacsin3	-1.24523	7.53385	2.00735	0.156539	0.999854	6.34e-05	None
Efcab14	-3.44553	4.79046	2.00614	0.156664	0.999854	6.34e-05	Down
Tmc6	1.34496	7.08328	1.99769	0.157539	0.999854	6.34e-05	None
Mapk15	-3.22713	5.81953	1.99069	0.158269	0.999854	6.34e-05	Down
Ddr2	1.20631	9.29973	1.98861	0.158487	0.999854	6.34e-05	None
Sppl2a	1.24734	7.12034	1.9648	0.161001	0.999854	6.34e-05	None
Anxa3	-1.42886	9.48221	1.96427	0.161057	0.999854	6.34e-05	None
Washc1	1.72861	5.95046	1.96202	0.161297	0.999854	6.34e-05	Up
Igfbp3	-1.83183	5.7181	1.94793	0.16281	0.999854	6.34e-05	Down
Cd151	1.12655	10.9304	1.93593	0.164112	0.999854	6.34e-05	None
Gnb1;Gnb2;Gnb4	1.34042	9.46345	1.93539	0.16417	0.999854	6.34e-05	None
Thbs1;Thbs2;Thbs3	-1.95808	5.53304	1.93399	0.164322	0.999854	6.34e-05	Down
Nap1l1;Nap1l4	-2.16852	7.97785	1.91526	0.16638	0.999854	6.34e-05	Down
Cep128	-1.21738	7.49994	1.90345	0.167692	0.999854	6.34e-05	None
Adamtsl5	-2.31095	5.83139	1.89908	0.168181	0.999854	6.34e-05	Down
Ctu2	-4.57055	1.81017	1.85104	0.173663	0.999854	6.34e-05	Down
Agrn	-1.09461	8.17211	1.85041	0.173736	0.999854	6.34e-05	None
Ap2a1;Ap2a2	-1.24011	7.2075	1.84703	0.174129	0.999854	6.34e-05	None
Tubb2a;Tubb2b;Tubb4a;Tubb4b;Tubb5	-1.11215	8.63454	1.84455	0.174418	0.999854	6.34e-05	None
Crip2	-3.3376	4.66385	1.8401	0.174939	0.999854	6.34e-05	Down
Hba	-1.39723	13.8115	1.83679	0.175328	0.999854	6.34e-05	None
Ssc5d	-2.28272	5.80026	1.83231	0.175855	0.999854	6.34e-05	Down
Ambp	-1.39874	9.53859	1.8293	0.17621	0.999854	6.34e-05	None
Cyria;Cyrib	-1.3888	6.62144	1.82395	0.176844	0.999854	6.34e-05	None
Mug1;Mug2	1.15088	11.255	1.81003	0.178504	0.999854	6.34e-05	None
Cat	1.1689	7.79052	1.80284	0.17937	0.999854	6.34e-05	None
Adipor1	1.26668	7.06366	1.79945	0.179779	0.999854	6.34e-05	None
Slc6a11;Slc6a6;Slc6a8	1.13285	9.67259	1.79844	0.179901	0.999854	6.34e-05	None
Uchl3;Uchl4	3.51169	4.35501	1.79705	0.180069	0.999854	6.34e-05	Up
Rcn3	-2.46217	5.36885	1.78925	0.181017	0.999854	6.34e-05	Down
Lrp8	-3.51871	4.27425	1.77104	0.183253	0.999854	6.34e-05	Down
Mst1	-2.69505	6.25011	1.76794	0.183637	0.999854	6.34e-05	Down
Rhou	1.13839	9.35144	1.7616	0.184425	0.999854	6.34e-05	None
Gpr108	1.50497	6.57454	1.75867	0.18479	0.999854	6.34e-05	Up
Entpd2	-2.96541	5.25862	1.75805	0.184867	0.999854	6.34e-05	Down
Rps13	-1.07915	8.48468	1.75309	0.185488	0.999854	6.34e-05	None
Hck;Lyn;Src;Yes1	-2.31802	6.12398	1.74128	0.186976	0.999854	6.34e-05	Down
Slc24a5	1.12361	9.45806	1.74008	0.187128	0.999854	6.34e-05	None
Dgcr2	-2.16678	5.93398	1.73606	0.187639	0.999854	6.34e-05	Down
Itih2	-0.933835	12.0944	1.73521	0.187746	0.999854	6.34e-05	None
Akr1c21;Akr1c6	1.17773	7.98631	1.73446	0.187842	0.999854	6.34e-05	None
Sqstm1	-1.19896	10.0476	1.73181	0.18818	0.999854	6.34e-05	None
Sema3b	1.74176	5.53169	1.7314	0.188232	0.999854	6.34e-05	Up
Tubb3;Tubb4a;Tubb4b;Tubb5;Tubb6	-2.04617	6.72717	1.72853	0.188598	0.999854	6.34e-05	Down
Igf1	-4.2517	3.29378	1.71986	0.189711	0.999854	6.34e-05	Down
Myh11;Myh14;Myh9	-1.32626	8.19568	1.71621	0.190182	0.999854	6.34e-05	None
Sec61a1	-4.04575	3.49548	1.71243	0.190671	0.999854	6.34e-05	Down
C3	-0.902088	12.4862	1.70922	0.191087	0.999854	6.34e-05	None
Slc7a5	0.99689	10.6904	1.70621	0.191477	0.999854	6.34e-05	None
Snx12;Snx3	1.3024	6.94584	1.70315	0.191877	0.999854	6.34e-05	None
Tns2;Tns3	-3.14309	4.79104	1.70251	0.19196	0.999854	6.34e-05	Down
Nid2	-1.14826	7.29024	1.6793	0.195017	0.999854	6.34e-05	None
Rpl9	-1.08616	8.9761	1.66117	0.197446	0.999854	6.34e-05	None
Chmp2a	-1.00936	9.43168	1.65168	0.198731	0.999854	6.34e-05	None
Ehd1;Ehd3	-1.21427	7.97569	1.64224	0.200018	0.999854	6.34e-05	None
Igsf11	-2.86624	5.34197	1.64078	0.200219	0.999854	6.34e-05	Down
Eml5	1.97053	6.92639	1.6401	0.200312	0.999854	6.34e-05	Up
Pros1	-1.25789	7.73811	1.63953	0.20039	0.999854	6.34e-05	None
Gnb4	1.07294	8.05093	1.63304	0.201283	0.999854	6.34e-05	None
Rpl37	-4.00307	4.20695	1.61461	0.203845	0.999854	6.34e-05	Down
Itm2c	-1.05203	9.78194	1.61081	0.204377	0.999854	6.34e-05	None
Pcolce	-1.12373	8.68192	1.60033	0.205857	0.999854	6.34e-05	None
Chadl	-3.08566	4.73025	1.58906	0.207461	0.999854	6.34e-05	Down
Ahcyl1	1.1871	6.90175	1.57901	0.208903	0.999854	6.34e-05	None
Arf4;Arf5	1.16848	7.29003	1.57421	0.209596	0.999854	6.34e-05	None
Fkbp9	-2.92518	4.9582	1.56146	0.211452	0.999854	6.34e-05	Down
Ccny	-3.69157	3.77077	1.56058	0.211581	0.999854	6.34e-05	Down
Arf2;Arf4;Arf5	1.04915	10.5439	1.55177	0.212875	0.999854	6.34e-05	None
Sspn	1.11819	8.27966	1.55009	0.213122	0.999854	6.34e-05	None
Eva1b	-0.99827	8.38189	1.54531	0.21383	0.999854	6.34e-05	None
Cd320	-2.44469	6.71741	1.53951	0.21469	0.999854	6.34e-05	Down
Mif	-1.81934	7.95956	1.53465	0.215417	0.999854	6.34e-05	Down
Tmem251	-2.48888	4.9174	1.53214	0.215792	0.999854	6.34e-05	Down
Krt16	-1.27565	6.7102	1.53067	0.216012	0.999854	6.34e-05	None
Mfsd1	-2.50831	6.16252	1.52916	0.216238	0.999854	6.34e-05	Down
Rgs4	3.00113	4.8377	1.52697	0.216567	0.999854	6.34e-05	Up
Ube2v1	-2.80411	5.14663	1.52503	0.216859	0.999854	6.34e-05	Down
Adam12	-1.33788	6.26798	1.52346	0.217097	0.999854	6.34e-05	None
Sdc2	1.11029	7.58041	1.52283	0.217191	0.999854	6.34e-05	None
Znrd2	-1.40074	6.0421	1.51935	0.217718	0.999854	6.34e-05	None
Map4k4;Mink1;Tnik	-1.08596	8.95771	1.51915	0.217749	0.999854	6.34e-05	None
Gng12	-0.97598	10.753	1.51536	0.218323	0.999854	6.34e-05	None
Ehd3;Ehd4	1.10229	8.26668	1.50308	0.220198	0.999854	6.34e-05	None
Rab31	1.31823	6.38032	1.49538	0.221383	0.999854	6.34e-05	None
Stx6	-3.05612	4.50575	1.492	0.221906	0.999854	6.34e-05	Down
Ndfip2	1.10419	8.35697	1.48677	0.222718	0.999854	6.34e-05	None
C1qtnf3	-0.976905	9.05967	1.48669	0.222731	0.999854	6.34e-05	None
Tnxb	-2.97898	4.62125	1.48172	0.223506	0.999854	6.34e-05	Down
Ahcyl1;Ahcyl2	1.00875	8.03541	1.47536	0.224503	0.999854	6.34e-05	None
Slc1a5	-2.04075	5.90982	1.47361	0.224777	0.999854	6.34e-05	Down
Cst6	-3.17248	3.6282	1.46641	0.225914	0.999854	6.34e-05	Down
Kiaa1109	-1.96561	6.09803	1.45308	0.228035	0.999854	6.34e-05	Down
Gys2	-3.41972	3.85243	1.44956	0.228598	0.999854	6.34e-05	Down
Mogs	-4.38374	3.43282	1.4461	0.229155	0.999854	6.34e-05	Down
Tm4sf1	-1.18774	7.52179	1.43044	0.231692	0.999854	6.34e-05	None
Srebf1	1.20465	7.02821	1.42423	0.232708	0.999854	6.34e-05	None
Slc36a1	-1.51638	6.01746	1.42201	0.233073	0.999854	6.34e-05	Down
Apip	-3.41347	0.727933	1.41807	0.233721	0.999854	6.34e-05	Down
Ssbp1	-4.04278	2.35636	1.41226	0.234682	0.999854	6.34e-05	Down
Tspan4	1.02595	8.97936	1.40912	0.235203	0.999854	6.34e-05	None
Nudt21	-3.32001	3.96765	1.4052	0.235855	0.999854	6.34e-05	Down
Rab15	-1.89533	9.81035	1.39667	0.237282	0.999854	6.34e-05	Down
Ctnnb1;Jup	1.39994	6.0924	1.39179	0.238103	0.999854	6.34e-05	None
Chmp4b	-1.06619	11.1887	1.38551	0.239165	0.999854	6.34e-05	None
Tnik	-1.90222	6.00766	1.37264	0.241359	0.999854	6.34e-05	Down
Ybx1	1.30139	6.45083	1.36551	0.242586	0.999854	6.34e-05	None
Rpsa	0.906251	9.4324	1.36116	0.243337	0.999854	6.34e-05	None
Lsm3	-3.77959	2.90824	1.35459	0.244477	0.999854	6.34e-05	Down
Prxl2a	1.655	5.24996	1.3543	0.244527	0.999854	6.34e-05	Up
Slc2a1	-1.17343	9.85238	1.35052	0.245188	0.999854	6.34e-05	None
H2ac11;H2ac12;H2ac13;H2ac15;H2ac20;H2ac4;H2ac6;H2ac7;H2ac8;H2aj;H2aw;Hist1h2af;Hist1h2an;Hist1h2ao;Hist1h2ap;Hist2h2aa1	-0.945042	9.58599	1.34577	0.24602	0.999854	6.34e-05	None
Cldnd1	1.05141	7.49183	1.34461	0.246222	0.999854	6.34e-05	None
Dkk3	-1.9124	6.15917	1.34344	0.246428	0.999854	6.34e-05	Down
Hbb-y	1.49519	5.56275	1.33705	0.247556	0.999854	6.34e-05	None
Ftl1	-2.68574	4.15803	1.33463	0.247983	0.999854	6.34e-05	Down
Lamp2	0.875789	9.67529	1.3284	0.24909	0.999854	6.34e-05	None
Dagla	-3.03297	4.21527	1.32566	0.249578	0.999854	6.34e-05	Down
F10;F9	-1.56794	5.4875	1.32168	0.25029	0.999854	6.34e-05	Down
Ppard	1.06194	8.45433	1.31255	0.251934	0.999854	6.34e-05	None
Hspa2;Hspa8	-0.949252	13.7159	1.30856	0.252656	0.999854	6.34e-05	None
Syngr1	0.997988	8.332	1.30696	0.252945	0.999854	6.34e-05	None
Gm5478	-1.34362	8.09904	1.30669	0.252996	0.999854	6.34e-05	None
Cyb5a	1.04758	7.24167	1.30497	0.253308	0.999854	6.34e-05	None
Srsf2	-1.08276	7.5998	1.30286	0.253692	0.999854	6.34e-05	None
Pi4k2b	0.991117	7.72658	1.30154	0.253932	0.999854	6.34e-05	None
Arpc5l	-2.09613	5.56397	1.29146	0.255779	0.999854	6.34e-05	Down
Vamp2	-3.35314	3.70077	1.28884	0.256262	0.999854	6.34e-05	Down
Rps23	-0.966494	8.51783	1.28719	0.256566	0.999854	6.34e-05	None
Rps27a	-0.842791	12.0314	1.27772	0.258323	0.999854	6.34e-05	None
Prss23	-1.13635	6.66883	1.27661	0.258531	0.999854	6.34e-05	None
Vegfa	-3.50354	4.18364	1.26504	0.260699	0.999854	6.34e-05	Down
Rell1	0.880233	8.54847	1.25889	0.26186	0.999854	6.34e-05	None
U2af1	-2.90244	4.29588	1.25792	0.262046	0.999854	6.34e-05	Down
Dnajb1;Dnajb4	0.982576	7.65566	1.25735	0.262154	0.999854	6.34e-05	None
Loxl2	-3.0529	4.07803	1.25695	0.26223	0.999854	6.34e-05	Down
Rap2b	-0.981339	10.0236	1.24478	0.264552	0.999854	6.34e-05	None
Nras	-1.64718	7.87608	1.23962	0.265544	0.999854	6.34e-05	Down
Arpc4	-0.957067	8.21757	1.23506	0.266426	0.999854	6.34e-05	None
Krt10	-1.00314	10.1903	1.2137	0.270601	0.999854	6.34e-05	None
Mrps25	-1.28715	10.0954	1.21368	0.270605	0.999854	6.34e-05	None
Pip4p1	1.09769	6.90881	1.20903	0.271524	0.999854	6.34e-05	None
H2bc12;H2bc14;H2bc21;H2bc3;H2bc4;H2bc7;H2bc9;H2bu1;Hist1h2bp;Hist2h2bb;Hist3h2ba	-0.9182	12.4936	1.20902	0.271526	0.999854	6.34e-05	None
Rps20	-0.872862	8.54572	1.203	0.272723	0.999854	6.34e-05	None
Ywhaq	0.896162	8.03596	1.20279	0.272765	0.999854	6.34e-05	None
Tmem50b	-1.82915	6.04651	1.20251	0.272821	0.999854	6.34e-05	Down
Rab32;Rab38	0.917605	10.0258	1.20013	0.273296	0.999854	6.34e-05	None
Krt78	-1.68007	8.20531	1.1992	0.273482	0.999854	6.34e-05	Down
Pygb;Pygl;Pygm	-0.958379	7.84821	1.19838	0.273646	0.999854	6.34e-05	None
Ccdc50	-0.913788	9.229	1.1888	0.275571	0.999854	6.34e-05	None
Cnmd	-2.20216	6.18971	1.18787	0.27576	0.999854	6.34e-05	Down
Ifitm3	0.883065	8.40108	1.18021	0.277312	0.999854	6.34e-05	None
Sult1c2	-2.70331	6.14196	1.17937	0.277485	0.999854	6.34e-05	Down
Tuba1c;Tuba4a;Tuba8	-0.762383	12.4204	1.17771	0.277824	0.999854	6.34e-05	None
Bbox1	-3.1254	3.76117	1.17627	0.278116	0.999854	6.34e-05	Down
Erp44	-2.43572	5.20634	1.17378	0.278626	0.999854	6.34e-05	Down
Cnih4	-3.23937	4.35652	1.16679	0.280063	0.999854	6.34e-05	Down
Itfg1	1.08226	6.70428	1.16604	0.280216	0.999854	6.34e-05	None
Rps6	-1.01096	10.4038	1.15791	0.281899	0.999854	6.34e-05	None
Sec31a	0.939935	7.13032	1.15688	0.282114	0.999854	6.34e-05	None
Rpl26	-0.940909	8.07045	1.15022	0.283502	0.999854	6.34e-05	None
Atp6v1g1	-1.82329	5.76821	1.1478	0.284011	0.999854	6.34e-05	Down
Ighv1-82	-2.26453	5.63921	1.14598	0.284391	0.999854	6.34e-05	Down
Mat2a	-1.61416	7.02338	1.14571	0.284448	0.999854	6.34e-05	Down
Ctnnb1	-0.952925	7.3808	1.14562	0.284467	0.999854	6.34e-05	None
Dct	0.77924	12.5042	1.13867	0.285933	0.999854	6.34e-05	None
Efnb1	1.34907	5.88079	1.13582	0.286537	0.999854	6.34e-05	None
Usp8	0.976762	7.10625	1.13555	0.286595	0.999854	6.34e-05	None
Loxl3	-1.01656	6.80183	1.13524	0.286661	0.999854	6.34e-05	None
Hvcn1	1.00927	6.97198	1.13349	0.287032	0.999854	6.34e-05	None
Tia1;Tial1	-1.85168	6.15019	1.12956	0.287868	0.999854	6.34e-05	Down
Ppp2ca	1.03801	6.82861	1.12811	0.288178	0.999854	6.34e-05	None
Tmem51	0.90729	8.01085	1.12383	0.289095	0.999854	6.34e-05	None
Spred1	1.02457	6.90639	1.12276	0.289326	0.999854	6.34e-05	None
Sf3a2	-3.44397	2.5047	1.10757	0.29261	0.999854	6.34e-05	Down
Vamp3	-2.28528	5.44551	1.10733	0.292663	0.999854	6.34e-05	Down
U2surp	-2.34452	5.20871	1.10409	0.29337	0.999854	6.34e-05	Down
Cotl1	0.88637	8.3652	1.10405	0.293378	0.999854	6.34e-05	None
Arf4	0.824715	9.19878	1.10145	0.293948	0.999854	6.34e-05	None
Fam174b	-1.58217	6.80865	1.09588	0.295172	0.999854	6.34e-05	Down
Atp1b3	0.801802	10.3315	1.09286	0.295839	0.999854	6.34e-05	None
Cxcl1	2.2973	4.31465	1.09237	0.295947	0.999854	6.34e-05	Up
Plxna1;Plxna3	-1.5991	7.6276	1.09084	0.296284	0.999854	6.34e-05	Down
Tor2a	-3.59079	3.62022	1.0885	0.296805	0.999854	6.34e-05	Down
Usp6nl	-1.21156	5.86602	1.08158	0.298344	0.999854	6.34e-05	None
Itga6	-1.16863	6.41551	1.08138	0.298389	0.999854	6.34e-05	None
Plpp1	-3.4678	3.75783	1.08035	0.29862	0.999854	6.34e-05	Down
Map2k1;Map2k2	-3.09492	3.58747	1.0795	0.298809	0.999854	6.34e-05	Down
Cnksr3	-2.85794	3.9728	1.07943	0.298825	0.999854	6.34e-05	Down
Acsbg1	-1.24015	5.86978	1.07795	0.299158	0.999854	6.34e-05	None
Htra1	1.17197	6.28012	1.07636	0.299512	0.999854	6.34e-05	None
Hck	-3.06716	5.90756	1.07513	0.29979	0.999854	6.34e-05	Down
Ptprs	-0.84749	10.5916	1.07324	0.300214	0.999854	6.34e-05	None
Tmem106a	1.00416	7.19667	1.07284	0.300306	0.999854	6.34e-05	None
Rp2	1.34786	5.63567	1.06899	0.301174	0.999854	6.34e-05	None
Acp2	1.09731	6.63707	1.06729	0.301559	0.999854	6.34e-05	None
Tubb4a;Tubb4b	-1.15875	9.98119	1.06577	0.301904	0.999854	6.34e-05	None
Tnc	-2.34078	5.07409	1.065	0.302078	0.999854	6.34e-05	Down
Tubb2a;Tubb2b;Tubb3;Tubb5	-1.63683	11.0503	1.0626	0.302624	0.999854	6.34e-05	Down
Nudt3	-3.32084	2.7324	1.06117	0.302948	0.999854	6.34e-05	Down
Srsf10	-2.99732	3.67847	1.05507	0.304342	0.999854	6.34e-05	Down
Atp5f1b	0.940398	7.12257	1.0465	0.306316	0.999854	6.34e-05	None
Cfl1	-0.843649	11.2472	1.03758	0.308386	0.999854	6.34e-05	None
Prps1l1	2.10483	4.5751	1.03683	0.308561	0.999854	6.34e-05	Up
Adcy3	1.07516	6.27524	1.03638	0.308665	0.999854	6.34e-05	None
C8b	-2.02067	8.88419	1.03559	0.308848	0.999854	6.34e-05	Down
Krt10;Krt14;Krt16	-1.53795	8.31132	1.03248	0.309578	0.999854	6.34e-05	Down
Slc44a1	-2.00908	6.546	1.02625	0.311041	0.999854	6.34e-05	Down
Rab5c	-0.826475	9.22701	1.01712	0.313203	0.999854	6.34e-05	None
Fads2	-2.78209	3.91437	1.01194	0.314439	0.999854	6.34e-05	Down
Abi1;Abi2	0.951158	6.78369	1.01103	0.314657	0.999854	6.34e-05	None
Afm	-0.836245	9.05281	1.00641	0.315765	0.999854	6.34e-05	None
Krit1	1.08337	6.1791	1.00542	0.316002	0.999854	6.34e-05	None
Epha3	-1.52499	6.65966	1.00214	0.316793	0.999854	6.34e-05	Down
Adgre5	0.946965	6.80069	1.00162	0.316919	0.999854	6.34e-05	None
Zdhhc5	1.06621	6.32854	0.995963	0.318289	0.999854	6.34e-05	None
Slc45a2	0.828477	8.55615	0.994584	0.318625	0.999854	6.34e-05	None
Bmpr1a	0.904332	7.39767	0.994368	0.318677	0.999854	6.34e-05	None
Adh1	-1.98151	4.78036	0.989443	0.319878	0.999854	6.34e-05	Down
Pik3r1	1.60365	11.2964	0.984979	0.320973	0.999854	6.34e-05	Up
Mib1	0.971793	6.72315	0.984566	0.321074	0.999854	6.34e-05	None
Sacs	0.968874	7.52849	0.983178	0.321415	0.999854	6.34e-05	None
Krt42	-0.999287	7.95922	0.978095	0.322669	0.999854	6.34e-05	None
Blvrb	-0.850837	8.25919	0.973269	0.323866	0.999854	6.34e-05	None
Rpl36a	-0.845586	8.1564	0.971652	0.324269	0.999854	6.34e-05	None
Atp1a1	0.744203	11.1795	0.970786	0.324484	0.999854	6.34e-05	None
Rps8	-0.884106	10.9534	0.968437	0.32507	0.999854	6.34e-05	None
Marcks	1.07055	7.26702	0.968399	0.32508	0.999854	6.34e-05	None
Tsga10	-1.05198	7.47376	0.966395	0.325581	0.999854	6.34e-05	None
Spry2	-1.58875	6.06779	0.965835	0.325721	0.999854	6.34e-05	Down
Nenf	-1.86212	5.05672	0.964593	0.326032	0.999854	6.34e-05	Down
H1f10	-2.27302	4.08139	0.959827	0.32723	0.999854	6.34e-05	Down
Lrch3	-3.16322	2.58437	0.958255	0.327627	0.999854	6.34e-05	Down
Vps35	0.835195	7.60732	0.958166	0.327649	0.999854	6.34e-05	None
Fmnl3	-2.04302	4.5776	0.956814	0.327991	0.999854	6.34e-05	Down
Tubb2a;Tubb2b;Tubb3;Tubb4b;Tubb5;Tubb6	-1.14245	10.1341	0.956728	0.328013	0.999854	6.34e-05	None
Mreg	0.874896	8.24076	0.95419	0.328655	0.999854	6.34e-05	None
Abracl	-2.00405	4.57674	0.953135	0.328923	0.999854	6.34e-05	Down
Rfc3	-3.21593	2.35084	0.951298	0.329389	0.999854	6.34e-05	Down
Col11a1	-1.47955	6.72778	0.946924	0.330503	0.999854	6.34e-05	None
Usp15;Usp4	1.03385	6.5007	0.945302	0.330918	0.999854	6.34e-05	None
Mtco2	-2.68722	3.94369	0.94289	0.331536	0.999854	6.34e-05	Down
Sh3bgrl3	-2.90583	4.28308	0.940441	0.332165	0.999854	6.34e-05	Down
Acta2;Actb	-0.703686	13.7995	0.939726	0.332348	0.999854	6.34e-05	None
Nap1l1	0.802833	7.88763	0.937432	0.332939	0.999854	6.34e-05	None
H1-4	-0.91504	7.95368	0.936981	0.333056	0.999854	6.34e-05	None
Cpne3	-0.973878	6.58045	0.933444	0.33397	0.999854	6.34e-05	None
Leprot	-2.4816	3.68463	0.93315	0.334046	0.999854	6.34e-05	Down
Anpep	1.2603	5.55423	0.930257	0.334796	0.999854	6.34e-05	None
Stat6	2.39282	3.73001	0.926433	0.335792	0.999854	6.34e-05	Up
Pgm2	-1.77875	5.18484	0.925097	0.33614	0.999854	6.34e-05	Down
Anxa1	-0.769119	10.385	0.922637	0.336784	0.999854	6.34e-05	None
Guk1	-2.96751	3.27554	0.92187	0.336985	0.999854	6.34e-05	Down
Ppp2r1b	1.82153	4.14771	0.919363	0.337642	0.999854	6.34e-05	Up
Slc25a4;Slc25a5	-1.6045	5.80106	0.917814	0.33805	0.999854	6.34e-05	Down
Elmod2	2.2602	4.00619	0.914315	0.338972	0.999854	6.34e-05	Up
Plscr1	0.956838	6.70139	0.912524	0.339446	0.999854	6.34e-05	None
Atp13a3	0.829905	7.73154	0.910056	0.3401	0.999854	6.34e-05	None
Srp9	0.759351	9.06896	0.909687	0.340197	0.999854	6.34e-05	None
Ncl	0.822095	7.63218	0.902503	0.342111	0.999854	6.34e-05	None
Pgrmc1	-2.32975	4.53234	0.902227	0.342185	0.999854	6.34e-05	Down
Plod3	-0.937692	6.82798	0.902092	0.342221	0.999854	6.34e-05	None
Mvb12b	-0.779501	9.23595	0.901605	0.342352	0.999854	6.34e-05	None
Khnyn	-2.13696	4.17257	0.901239	0.34245	0.999854	6.34e-05	Down
Srp14	0.79869	8.6094	0.899938	0.342798	0.999854	6.34e-05	None
Pcbp1;Pcbp2	-0.789081	10.0375	0.898992	0.343052	0.999854	6.34e-05	None
Mbnl1	-1.1515	5.81341	0.898196	0.343266	0.999854	6.34e-05	None
Rnf130	-0.81545	9.13135	0.897084	0.343565	0.999854	6.34e-05	None
Ezr;Rdx	-1.02024	6.59943	0.889603	0.345585	0.999854	6.34e-05	None
Ahsg	0.678329	14.2862	0.884269	0.347035	0.999854	6.34e-05	None
Unc5c	-0.78268	7.51957	0.880818	0.347978	0.999854	6.34e-05	None
Peli1	-1.02559	6.15632	0.880395	0.348093	0.999854	6.34e-05	None
Snx8	1.12222	5.97217	0.878471	0.348621	0.999854	6.34e-05	None
Tra2a	-1.78971	5.15862	0.869774	0.351018	0.999854	6.34e-05	Down
Serpinf1	-0.709649	10.4808	0.86903	0.351224	0.999854	6.34e-05	None
Wwp1;Wwp2	-1.8624	6.30912	0.868231	0.351446	0.999854	6.34e-05	Down
Adamts4	-0.799856	7.42976	0.866823	0.351836	0.999854	6.34e-05	None
Pcyox1l	-1.63322	5.40942	0.857763	0.354366	0.999854	6.34e-05	Down
Nrp2	-0.818429	9.19905	0.857694	0.354385	0.999854	6.34e-05	None
Snx1	0.917787	6.58751	0.857438	0.354457	0.999854	6.34e-05	None
Wdr6	1.11489	5.67556	0.854749	0.355212	0.999854	6.34e-05	None
Eef2	-0.731786	10.0192	0.853027	0.355697	0.999854	6.34e-05	None
Tnfrsf1a	-1.07863	6.08937	0.852708	0.355787	0.999854	6.34e-05	None
Pol	0.898467	7.07495	0.851092	0.356244	0.999854	6.34e-05	None
Rbm3	-0.758259	8.76559	0.85109	0.356244	0.999854	6.34e-05	None
Tmprss13	-1.4059	7.92622	0.850123	0.356518	0.999854	6.34e-05	None
Ctsb	0.789111	8.48423	0.849039	0.356824	0.999854	6.34e-05	None
Tsku	-3.3987	2.76468	0.848669	0.356929	0.999854	6.34e-05	Down
Yipf6	1.64692	5.5895	0.847071	0.357382	0.999854	6.34e-05	Up
Cemip2	-0.759177	7.5069	0.84456	0.358096	0.999854	6.34e-05	None
Arf5	0.818756	7.18273	0.844282	0.358175	0.999854	6.34e-05	None
Nedd4l	-0.731634	8.15228	0.842615	0.35865	0.999854	6.34e-05	None
Rras	-1.41557	6.48593	0.842357	0.358724	0.999854	6.34e-05	None
Nmd3	1.83717	3.92414	0.841579	0.358946	0.999854	6.34e-05	Up
Adk	-0.89844	7.79926	0.841425	0.35899	0.999854	6.34e-05	None
Col6a6	-1.47248	6.47947	0.837747	0.360042	0.999854	6.34e-05	None
H2-K1	-1.86956	4.57201	0.835131	0.360793	0.999854	6.34e-05	Down
Cdca8	-1.86029	4.60807	0.834212	0.361057	0.999854	6.34e-05	Down
Cmip	0.817189	7.37815	0.832872	0.361443	0.999854	6.34e-05	None
Nid1	-0.74018	8.13572	0.832226	0.36163	0.999854	6.34e-05	None
Katnal2;Spata5	-0.935267	7.54703	0.829523	0.362411	0.999854	6.34e-05	None
Ttyh3	-0.700931	9.52079	0.829386	0.36245	0.999854	6.34e-05	None
Ppp1r12a	2.89816	2.73337	0.828842	0.362608	0.999854	6.34e-05	Up
Ptgir	-1.88632	5.70383	0.826222	0.363367	0.999854	6.34e-05	Down
Epb41l2;Epb41l3	2.15406	4.82655	0.824871	0.36376	0.999854	6.34e-05	Up
Ykt6	0.87137	6.80053	0.82385	0.364057	0.999854	6.34e-05	None
Spon1	-0.975788	6.29932	0.823817	0.364067	0.999854	6.34e-05	None
Megf10	0.797065	7.52629	0.823345	0.364204	0.999854	6.34e-05	None
Hpca;Ncald	-1.01822	6.09165	0.823239	0.364235	0.999854	6.34e-05	None
Fbln2	-2.22252	4.69753	0.822677	0.364399	0.999854	6.34e-05	Down
Slc6a17	1.53326	5.78697	0.820939	0.364906	0.999854	6.34e-05	Up
Got2	-1.35698	9.93005	0.82028	0.365098	0.999854	6.34e-05	None
Hmgb1	-2.04995	5.06967	0.820136	0.365141	0.999854	6.34e-05	Down
Ifngr1	-0.839869	7.03003	0.81818	0.365713	0.999854	6.34e-05	None
Stx7	0.743874	8.92668	0.817029	0.36605	0.999854	6.34e-05	None
Ppig	-2.42787	4.06168	0.815696	0.366442	0.999854	6.34e-05	Down
Atp1a1;Atp1a3	0.676766	10.9215	0.815562	0.366481	0.999854	6.34e-05	None
Rpl8	-0.75038	8.80855	0.814986	0.36665	0.999854	6.34e-05	None
Lima1	-1.07444	5.76583	0.811913	0.367555	0.999854	6.34e-05	None
Slc39a14	2.36931	4.14978	0.811827	0.367581	0.999854	6.34e-05	Up
H4c1	-0.689431	11.5734	0.809488	0.368272	0.999854	6.34e-05	None
Tspan13	0.824518	7.3628	0.807996	0.368713	0.999854	6.34e-05	None
Ggh	-1.76599	4.7813	0.807449	0.368875	0.999854	6.34e-05	Down
Sdc4	0.744435	8.17413	0.805036	0.369592	0.999854	6.34e-05	None
Atp6v0d1	0.735228	9.00663	0.802115	0.370462	0.999854	6.34e-05	None
Otor	-2.84772	1.83088	0.80028	0.37101	0.999854	6.34e-05	Down
Kit	0.829935	7.12268	0.799821	0.371147	0.999854	6.34e-05	None
Ctdnep1	1.06357	6.08408	0.798744	0.371469	0.999854	6.34e-05	None
Col15a1	-1.96411	5.28307	0.798653	0.371497	0.999854	6.34e-05	Down
Esd	0.989057	6.15673	0.798318	0.371597	0.999854	6.34e-05	None
Neo1	-0.892732	6.595	0.794723	0.372676	0.999854	6.34e-05	None
Sdc1	0.781983	7.42323	0.794717	0.372677	0.999854	6.34e-05	None
Ddx17;Ddx3x;Ddx5	-1.37095	6.60983	0.794428	0.372765	0.999854	6.34e-05	None
Mgrn1	0.758009	7.68512	0.794279	0.372809	0.999854	6.34e-05	None
Sorbs3	-2.55522	3.71843	0.793912	0.37292	0.999854	6.34e-05	Down
Colec10	-0.836089	7.3116	0.792069	0.373475	0.999854	6.34e-05	None
Dcbld1	1.18963	5.55737	0.790998	0.373799	0.999854	6.34e-05	None
Serbp1	0.992899	6.07284	0.790498	0.373949	0.999854	6.34e-05	None
Atp7a	0.719842	9.00441	0.789552	0.374236	0.999854	6.34e-05	None
Rab21	0.705375	8.32046	0.786792	0.375072	0.999854	6.34e-05	None
Cd72	-2.84513	1.84031	0.782401	0.376408	0.999854	6.34e-05	Down
Dip2b	-0.658797	9.9728	0.781771	0.3766	0.999854	6.34e-05	None
MINDY3	0.73301	7.67215	0.78072	0.376921	0.999854	6.34e-05	None
Disp1	1.11705	5.6793	0.775684	0.378464	0.999854	6.34e-05	None
Cdv3	0.89049	6.60765	0.77462	0.378792	0.999854	6.34e-05	None
Tmem87b	1.57707	5.47017	0.773052	0.379275	0.999854	6.34e-05	Up
Fat4	-1.63228	5.11847	0.772802	0.379351	0.999854	6.34e-05	Down
Dnm3	2.12495	4.57212	0.769518	0.380366	0.999854	6.34e-05	Up
Fermt2	0.852609	6.59945	0.769346	0.380419	0.999854	6.34e-05	None
Ankfy1	-1.76916	6.81938	0.769008	0.380524	0.999854	6.34e-05	Down
Bud31	1.05014	5.77076	0.768171	0.380783	0.999854	6.34e-05	None
Slc20a2	1.14432	5.60221	0.76807	0.380815	0.999854	6.34e-05	None
Ppic	-0.750712	9.36074	0.767759	0.380911	0.999854	6.34e-05	None
Cyld	-2.21339	4.35179	0.767281	0.38106	0.999854	6.34e-05	Down
Slc49a4	0.892647	7.01206	0.766274	0.381372	0.999854	6.34e-05	None
Tubb3;Tubb4a;Tubb4b;Tubb6	-0.645433	10.8709	0.765517	0.381608	0.999854	6.34e-05	None
Rdh11	1.01244	6.05195	0.764281	0.381992	0.999854	6.34e-05	None
Atp9a	0.832452	6.78051	0.762336	0.382598	0.999854	6.34e-05	None
Krt2;Krt5;Krt6a;Krt73;Krt76	-0.801622	9.71259	0.761689	0.382801	0.999854	6.34e-05	None
Gsta1	0.827387	7.61154	0.761282	0.382928	0.999854	6.34e-05	None
Cadm4	-0.924895	6.51699	0.759618	0.383448	0.999854	6.34e-05	None
Rab32	0.715647	8.04662	0.759321	0.383541	0.999854	6.34e-05	None
Nat1;Nat2;Nat3	-1.3847	6.14365	0.758882	0.383679	0.999854	6.34e-05	None
Snx17	-1.9571	5.07944	0.755748	0.384662	0.999854	6.34e-05	Down
F5	-0.632565	11.4601	0.753516	0.385365	0.999854	6.34e-05	None
Rpl36	-0.743234	8.11414	0.749979	0.386483	0.999854	6.34e-05	None
Fkbp15	1.84836	5.50963	0.749835	0.386528	0.999854	6.34e-05	Up
Etf1	1.20329	5.38175	0.748532	0.386941	0.999854	6.34e-05	None
Gstp1	0.684781	8.96768	0.747833	0.387163	0.999854	6.34e-05	None
Frzb	-1.03569	6.09185	0.745491	0.387908	0.999854	6.34e-05	None
Jak1;Tyk2	0.852653	6.64347	0.744046	0.388368	0.999854	6.34e-05	None
Prokr1	-0.803181	6.94197	0.740801	0.389404	0.999854	6.34e-05	None
Mvp	0.704714	8.13956	0.740662	0.389449	0.999854	6.34e-05	None
Daam1;Daam2	0.761015	7.20788	0.740235	0.389586	0.999854	6.34e-05	None
Rpl35a	0.721775	7.85583	0.740066	0.38964	0.999854	6.34e-05	None
Tubb2a;Tubb3;Tubb5	2.41022	3.86353	0.738756	0.39006	0.999854	6.34e-05	Up
Prdx1	0.666011	10.0692	0.736779	0.390695	0.999854	6.34e-05	None
Rab11a;Rab11b	0.645767	10.1195	0.73534	0.391158	0.999854	6.34e-05	None
Rab13	-1.04007	5.95018	0.734345	0.391478	0.999854	6.34e-05	None
Pafah1b1	0.780753	6.97231	0.730865	0.392603	0.999854	6.34e-05	None
Tubb1;Tubb2a;Tubb2b;Tubb4b;Tubb5;Tubb6	-1.37726	7.8454	0.723372	0.39504	0.999854	6.34e-05	None
Anxa4	-0.729615	8.50338	0.722514	0.395321	0.999854	6.34e-05	None
Dhfr	0.820775	6.7816	0.72182	0.395547	0.999854	6.34e-05	None
Ranbp10	-2.0973	4.4638	0.721679	0.395594	0.999854	6.34e-05	Down
Trpv2	0.915146	6.18376	0.718242	0.396721	0.999854	6.34e-05	None
Acvr2a	0.785822	7.29929	0.717791	0.396869	0.999854	6.34e-05	None
Eif4a1	-0.719653	8.37622	0.716718	0.397222	0.999854	6.34e-05	None
Dbx2	-3.20619	3.73769	0.716436	0.397315	0.999854	6.34e-05	Down
Hras;Kras	-1.24362	7.89535	0.716383	0.397333	0.999854	6.34e-05	None
Gspt1;Gspt2	0.91645	6.14277	0.710432	0.3993	0.999854	6.34e-05	None
Tspan3	0.64769	10.3632	0.710044	0.399429	0.999854	6.34e-05	None
Rpl6	-0.684966	8.90062	0.709216	0.399704	0.999854	6.34e-05	None
Slc5a3	0.95358	6.07373	0.709098	0.399743	0.999854	6.34e-05	None
Rpl14	-0.640518	9.88869	0.705452	0.400958	0.999854	6.34e-05	None
Uxs1	-0.805125	6.75837	0.703907	0.401474	0.999854	6.34e-05	None
Wdr75	-3.03179	1.46124	0.702532	0.401934	0.999854	6.34e-05	Down
Gpc1	-0.771365	7.07036	0.701806	0.402178	0.999854	6.34e-05	None
Olfml3	-1.88733	5.08632	0.701691	0.402216	0.999854	6.34e-05	Down
Tnfrsf12a	0.863794	6.54709	0.699058	0.4031	0.999854	6.34e-05	None
Tmem181a	0.769729	7.07658	0.697981	0.403463	0.999854	6.34e-05	None
Aldh8a1	0.711375	7.66444	0.697478	0.403632	0.999854	6.34e-05	None
Hbb-bs	2.97286	4.08768	0.696382	0.404002	0.999854	6.34e-05	Up
Npnt	-1.77218	4.41816	0.695968	0.404142	0.999854	6.34e-05	Down
Snrpd3	-0.877384	6.62173	0.69559	0.40427	0.999854	6.34e-05	None
Pdgfrb	-2.33962	3.78926	0.694865	0.404514	0.999854	6.34e-05	Down
Man1a1	-1.6531	6.48407	0.69484	0.404523	0.999854	6.34e-05	Down
Arl15	-0.888883	6.40514	0.693661	0.404922	0.999854	6.34e-05	None
Slc38a1	0.703924	9.81488	0.692377	0.405357	0.999854	6.34e-05	None
Pdcd6ip	-0.561423	12.7992	0.691823	0.405545	0.999854	6.34e-05	None
Slc9a3r1	0.693924	7.63214	0.687956	0.406861	0.999854	6.34e-05	None
Hebp1	-1.17562	5.23534	0.68693	0.407211	0.999854	6.34e-05	None
Tlr3	1.38537	4.61595	0.683479	0.408391	0.999854	6.34e-05	None
Arhgef12	-2.41759	3.55217	0.683023	0.408548	0.999854	6.34e-05	Down
Mamdc2	0.753419	7.40512	0.683018	0.408549	0.999854	6.34e-05	None
Tex30	-3.38365	0.760626	0.682166	0.408842	0.999854	6.34e-05	Down
Fyn;Src;Yes1	-1.65061	6.58032	0.680462	0.409428	0.999854	6.34e-05	Down
Psen1;Psen2	-0.829459	8.01051	0.67711	0.410584	0.999854	6.34e-05	None
Tmem185a;Tmem185b	0.782892	8.49287	0.676775	0.410699	0.999854	6.34e-05	None
Exoc8	2.98494	2.73326	0.673863	0.411708	0.999854	6.34e-05	Up
Ptpn14;Ptpn21	2.62056	1.87283	0.66883	0.41346	0.999854	6.34e-05	Up
Rraga	-2.41782	3.48696	0.665827	0.41451	0.999854	6.34e-05	Down
Snrpe	-1.41857	5.50346	0.665803	0.414519	0.999854	6.34e-05	None
Efemp2	-1.75621	5.41341	0.665072	0.414775	0.999854	6.34e-05	Down
Arfip2	-2.50542	3.21024	0.664368	0.415022	0.999854	6.34e-05	Down
Magoh;Magohb	-1.99637	5.88431	0.661171	0.416147	0.999854	6.34e-05	Down
Gja1	0.637406	9.66204	0.659825	0.416622	0.999854	6.34e-05	None
Atg5	-2.96412	2.61619	0.658814	0.416979	0.999854	6.34e-05	Down
Rabep2	-2.53504	2.97811	0.653931	0.418711	0.999854	6.34e-05	Down
Pvr	-0.703026	7.76651	0.653573	0.418838	0.999854	6.34e-05	None
Atp11a	0.794477	6.7372	0.652608	0.419182	0.999854	6.34e-05	None
Rpl22	0.752745	8.5785	0.651955	0.419415	0.999854	6.34e-05	None
Ppp1ca	-1.84592	5.19848	0.651698	0.419506	0.999854	6.34e-05	Down
Rab27a	0.635917	8.56845	0.650221	0.420034	0.999854	6.34e-05	None
Lrrc8d	0.94635	5.83934	0.648868	0.420518	0.999854	6.34e-05	None
Agl	-0.824928	6.57795	0.648609	0.420611	0.999854	6.34e-05	None
Slc6a9	-1.9717	4.51069	0.647863	0.420878	0.999854	6.34e-05	Down
Plxnb2	-0.64995	9.22672	0.647059	0.421166	0.999854	6.34e-05	None
Cdc42	-0.692023	10.3665	0.645512	0.421722	0.999854	6.34e-05	None
Cd81	-0.715867	12.64	0.645351	0.42178	0.999854	6.34e-05	None
Lrp5;Lrp6	-1.33838	5.83439	0.645137	0.421857	0.999854	6.34e-05	None
Fyn;Yes1	-1.18726	8.88053	0.645037	0.421893	0.999854	6.34e-05	None
Ptgds	-0.791766	7.89792	0.644383	0.422128	0.999854	6.34e-05	None
Mlf2	-1.23303	6.60123	0.642463	0.42282	0.999854	6.34e-05	None
Rab4a;Rab4b	-1.33956	5.90161	0.641948	0.423006	0.999854	6.34e-05	None
Acta2;Actb;Actbl2	-0.566702	12.5779	0.641914	0.423018	0.999854	6.34e-05	None
Tom1l1	-0.679962	7.65992	0.641459	0.423183	0.999854	6.34e-05	None
Sgta	-0.832266	6.32584	0.640272	0.423612	0.999854	6.34e-05	None
Capn7	-1.50154	4.99704	0.639173	0.42401	0.999854	6.34e-05	Down
Rab43	1.99054	4.38884	0.637948	0.424455	0.999854	6.34e-05	Up
Ganab	0.837775	6.43607	0.635948	0.425182	0.999854	6.34e-05	None
Cdh13	-1.43812	5.23993	0.635775	0.425245	0.999854	6.34e-05	None
Itgb5	0.703053	7.89519	0.633281	0.426155	0.999854	6.34e-05	None
Srsf3	-0.652264	8.11365	0.630639	0.427121	0.999854	6.34e-05	None
Gpm6a	-1.17992	7.87616	0.630187	0.427287	0.999854	6.34e-05	None
Mmp14;Mmp15	-0.882624	6.66074	0.628574	0.427879	0.999854	6.34e-05	None
Thop1	-2.37855	3.39754	0.628179	0.428024	0.999854	6.34e-05	Down
Tspan7	-0.771094	7.91739	0.627673	0.42821	0.999854	6.34e-05	None
Angptl6	-2.23364	3.7438	0.626684	0.428574	0.999854	6.34e-05	Down
Cmtm7	-2.08265	3.47951	0.626274	0.428725	0.999854	6.34e-05	Down
Ptdss2	1.99866	5.79904	0.624368	0.429429	0.999854	6.34e-05	Up
Mta2	-1.53891	4.89943	0.62261	0.430079	0.999854	6.34e-05	Down
Sema4b	-1.38213	4.38472	0.622329	0.430183	0.999854	6.34e-05	None
Eif2s1	-0.817537	6.33906	0.621961	0.430319	0.999854	6.34e-05	None
Anp32b	-1.22833	6.34065	0.620925	0.430704	0.999854	6.34e-05	None
Las1l	-2.26326	3.63309	0.619766	0.431134	0.999854	6.34e-05	Down
Ssr3	-2.23243	3.73716	0.619513	0.431228	0.999854	6.34e-05	Down
Ptpn23	0.751423	6.69986	0.617491	0.431981	0.999854	6.34e-05	None
Ppia	-0.60997	12.221	0.616717	0.43227	0.999854	6.34e-05	None
Dcn	-0.643165	7.94265	0.615463	0.432738	0.999854	6.34e-05	None
Ywhab;Ywhag;Ywhah;Ywhaq	1.57782	9.13667	0.61515	0.432855	0.999854	6.34e-05	Up
Stat1	-0.840616	6.61817	0.614249	0.433192	0.999854	6.34e-05	None
Pik3ca	-3.17302	0.722684	0.611022	0.434403	0.999854	6.34e-05	Down
Nedd4	0.630155	8.15697	0.610467	0.434612	0.999854	6.34e-05	None
Nectin2	-1.36479	5.4209	0.609632	0.434926	0.999854	6.34e-05	None
Slc2a3	-0.637225	8.01159	0.60893	0.435191	0.999854	6.34e-05	None
Rnf24	1.11832	5.45181	0.605253	0.436581	0.999854	6.34e-05	None
Igfbp4	-1.38744	5.28572	0.599471	0.43878	0.999854	6.34e-05	None
Srsf1	-0.688609	8.1305	0.598938	0.438984	0.999854	6.34e-05	None
St3gal1	-1.38175	5.48386	0.598231	0.439254	0.999854	6.34e-05	None
Slc16a1	0.607642	8.27137	0.597244	0.439632	0.999854	6.34e-05	None
Csnk1g2;Csnk1g3	0.701857	7.38167	0.594492	0.440687	0.999854	6.34e-05	None
Itga2b	-1.19174	7.02871	0.593298	0.441147	0.999854	6.34e-05	None
Pi4k2a	0.77396	7.04157	0.593244	0.441168	0.999854	6.34e-05	None
Ist1	-0.589869	10.3413	0.591923	0.441676	0.999854	6.34e-05	None
Creg1	-1.44282	5.02318	0.59156	0.441817	0.999854	6.34e-05	None
Kras	-1.81301	4.74408	0.590935	0.442058	0.999854	6.34e-05	Down
Efr3a	0.689203	7.34785	0.589624	0.442565	0.999854	6.34e-05	None
Nucb1	0.671369	7.20405	0.589128	0.442757	0.999854	6.34e-05	None
Tcirg1	0.6952	7.09267	0.588954	0.442824	0.999854	6.34e-05	None
Bpgm	-0.724348	7.47946	0.588848	0.442865	0.999854	6.34e-05	None
Ssrp1	-1.43494	5.06097	0.588404	0.443037	0.999854	6.34e-05	None
H2az1;H2az2	-0.861445	6.01017	0.585507	0.444162	0.999854	6.34e-05	None
Rps25	-0.642053	9.56524	0.584118	0.444703	0.999854	6.34e-05	None
Hapln1	-0.607845	10.0138	0.583992	0.444752	0.999854	6.34e-05	None
Gtpbp2	2.07053	3.0377	0.583632	0.444892	0.999854	6.34e-05	Up
Spata2	-2.36882	2.97658	0.581683	0.445653	0.999854	6.34e-05	Down
Pebp1	0.65057	7.51545	0.580283	0.446201	0.999854	6.34e-05	None
Igf2bp2;Igf2bp3	-0.869281	5.98127	0.577534	0.44728	0.999854	6.34e-05	None
Purb	-1.40197	5.16778	0.577281	0.44738	0.999854	6.34e-05	None
Acvr1	0.701257	7.87047	0.577205	0.44741	0.999854	6.34e-05	None
Erbin	0.798348	6.28582	0.57714	0.447435	0.999854	6.34e-05	None
Aoc1	1.02726	5.3596	0.57601	0.447881	0.999854	6.34e-05	None
Tm9sf2	0.615636	7.96451	0.574349	0.448536	0.999854	6.34e-05	None
Daam1	0.623894	7.97298	0.571563	0.449638	0.999854	6.34e-05	None
Tbc1d15	-2.17955	3.62265	0.570877	0.449911	0.999854	6.34e-05	Down
Rpl31	-0.682762	8.41419	0.570851	0.449921	0.999854	6.34e-05	None
Rpl18	-0.627565	10.455	0.570441	0.450084	0.999854	6.34e-05	None
Actn1;Actn4	-0.624874	7.47684	0.569541	0.450441	0.999854	6.34e-05	None
Rtn4	-0.760251	6.68454	0.569107	0.450614	0.999854	6.34e-05	None
Ssr4	-1.71028	4.98266	0.567973	0.451066	0.999854	6.34e-05	Down
Mfap5	-1.91517	4.35692	0.564193	0.452576	0.999854	6.34e-05	Down
Nptn	0.614224	8.68899	0.563598	0.452814	0.999854	6.34e-05	None
Wdfy3	-2.44482	3.72632	0.563356	0.452911	0.999854	6.34e-05	Down
Ywhaz	0.568905	9.72531	0.560509	0.454055	0.999854	6.34e-05	None
Tg	-0.707554	7.95583	0.559833	0.454327	0.999854	6.34e-05	None
Rap2a	-0.802189	6.52546	0.558974	0.454674	0.999854	6.34e-05	None
Atp11c	-1.23604	4.61136	0.558092	0.45503	0.999854	6.34e-05	None
Akr1e2	-2.19002	4.29364	0.55645	0.455694	0.999854	6.34e-05	Down
Sell	1.44568	5.06189	0.555383	0.456126	0.999854	6.34e-05	None
Tom1	-0.651754	7.48352	0.553549	0.456871	0.999854	6.34e-05	None
Dctn1	0.980023	5.43045	0.552858	0.457152	0.999854	6.34e-05	None
Snx1;Snx2	0.799112	6.19333	0.552481	0.457306	0.999854	6.34e-05	None
Itm2b	0.667513	9.29269	0.552339	0.457364	0.999854	6.34e-05	None
Vdac2	0.612232	8.38977	0.552142	0.457444	0.999854	6.34e-05	None
Chmp1a	-0.617316	8.90153	0.552046	0.457483	0.999854	6.34e-05	None
Ctdsp2	-0.664263	7.08665	0.55151	0.457701	0.999854	6.34e-05	None
Jak1	0.731999	6.84212	0.551309	0.457783	0.999854	6.34e-05	None
Crkl	-0.740939	6.68509	0.550116	0.45827	0.999854	6.34e-05	None
Smad1;Smad5	-1.37518	5.11676	0.548951	0.458747	0.999854	6.34e-05	None
Rpl13a	-0.58479	9.52204	0.548052	0.459115	0.999854	6.34e-05	None
Gyg1	-1.40321	4.96437	0.54754	0.459325	0.999854	6.34e-05	None
Mcm7	-1.66528	5.07619	0.547143	0.459487	0.999854	6.34e-05	Down
Ddx27	1.8054	3.73078	0.546124	0.459906	0.999854	6.34e-05	Up
Cmpk1	0.713688	6.75876	0.545905	0.459996	0.999854	6.34e-05	None
Rpl29	-1.88337	4.28064	0.544729	0.460479	0.999854	6.34e-05	Down
Pfkl;Pfkm;Pfkp	-1.11743	7.03697	0.544475	0.460584	0.999854	6.34e-05	None
Cilp2	-1.39589	4.97584	0.543837	0.460847	0.999854	6.34e-05	None
Tm7sf3	-0.632745	7.56172	0.542406	0.461437	0.999854	6.34e-05	None
Krt6a	-0.699523	7.35282	0.542106	0.461561	0.999854	6.34e-05	None
Lamp1	0.560216	10.289	0.542008	0.461602	0.999854	6.34e-05	None
Anp32a	1.90043	4.19423	0.541279	0.461903	0.999854	6.34e-05	Up
Prmt1	0.768669	6.29659	0.541212	0.461931	0.999854	6.34e-05	None
Vdac3	0.713937	6.7883	0.538	0.463263	0.999854	6.34e-05	None
Shc1	-0.983163	5.55265	0.537799	0.463346	0.999854	6.34e-05	None
Gps1	-1.04111	5.20829	0.536643	0.463827	0.999854	6.34e-05	None
Bmpr2	-0.608567	7.80538	0.533054	0.465326	0.999854	6.34e-05	None
Ca6	-1.96667	4.01836	0.531289	0.466065	0.999854	6.34e-05	Down
Arfip1;Gm37240	0.605732	8.07729	0.531184	0.466109	0.999854	6.34e-05	None
Pfkm	1.33017	5.15889	0.52801	0.467445	0.999854	6.34e-05	None
Wdr48	0.864258	5.78816	0.527371	0.467714	0.999854	6.34e-05	None
Fkbp1a	0.625752	10.8299	0.527156	0.467805	0.999854	6.34e-05	None
Wdfy1	0.620979	7.13283	0.525649	0.468442	0.999854	6.34e-05	None
Steap1	-1.64434	4.09193	0.52474	0.468827	0.999854	6.34e-05	Down
Epb41l3	-2.57199	2.93947	0.521707	0.470114	0.999854	6.34e-05	Down
Npdc1	-0.952695	6.72829	0.519251	0.471161	0.999854	6.34e-05	None
Ddi2	-1.11026	4.82013	0.518089	0.471658	0.999854	6.34e-05	None
Kpnb1	-0.606987	7.84221	0.517365	0.471968	0.999854	6.34e-05	None
B2m	-0.629977	7.21938	0.517307	0.471993	0.999854	6.34e-05	None
Krt5;Krt6a	-0.652605	11.0683	0.516712	0.472248	0.999854	6.34e-05	None
Tufm	0.623976	9.52953	0.515517	0.47276	0.999854	6.34e-05	None
Strip1	-2.99226	1.55361	0.515486	0.472774	0.999854	6.34e-05	Down
Rab4a	0.649879	7.36871	0.515426	0.472799	0.999854	6.34e-05	None
Rab3a	1.06453	5.10578	0.514712	0.473106	0.999854	6.34e-05	None
Myh10;Myh11;Myh14	-0.879464	5.7268	0.511631	0.474434	0.999854	6.34e-05	None
Vdac1	0.573255	9.01311	0.510647	0.474859	0.999854	6.34e-05	None
Ginm1	0.66522	7.60914	0.510347	0.474989	0.999854	6.34e-05	None
Wfdc1	-1.92529	3.27121	0.510092	0.475099	0.999854	6.34e-05	Down
Capza1;Capza2	-1.05694	7.24692	0.509523	0.475345	0.999854	6.34e-05	None
Ca3	-1.1128	6.56917	0.508959	0.47559	0.999854	6.34e-05	None
Vps26b	0.844393	5.87248	0.50783	0.47608	0.999854	6.34e-05	None
Gmppb	-1.16081	5.898	0.507435	0.476251	0.999854	6.34e-05	None
Pin4	-2.25803	1.8663	0.506394	0.476704	0.999854	6.34e-05	Down
Vamp2;Vamp3	0.577214	7.92162	0.506229	0.476776	0.999854	6.34e-05	None
Eno1;Eno3	-0.681647	9.12681	0.505194	0.477227	0.999854	6.34e-05	None
Cfl2	-0.607303	8.60639	0.503284	0.478061	0.999854	6.34e-05	None
Antxr2	0.598247	8.0985	0.5023	0.478491	0.999854	6.34e-05	None
Rab8b	0.576957	7.97642	0.502191	0.478539	0.999854	6.34e-05	None
Galm	0.672749	6.92899	0.501857	0.478685	0.999854	6.34e-05	None
Aldob	0.61161	7.75278	0.501566	0.478813	0.999854	6.34e-05	None
Fmnl2	-1.48167	4.41768	0.501555	0.478818	0.999854	6.34e-05	None
Mapk1;Mapk3	0.608685	7.50314	0.500522	0.479271	0.999854	6.34e-05	None
Psap	0.614684	9.44062	0.500402	0.479323	0.999854	6.34e-05	None
Adgrg1	0.609926	10.0207	0.500359	0.479342	0.999854	6.34e-05	None
Syt4	-0.50052	12.7757	0.500217	0.479405	0.999854	6.34e-05	None
Hfe	1.09496	4.83298	0.499668	0.479646	0.999854	6.34e-05	None
Oga	-1.62146	4.88183	0.498891	0.479988	0.999854	6.34e-05	Down
Myo5a	0.699873	6.60636	0.498418	0.480196	0.999854	6.34e-05	None
Lhfpl6	-1.11798	6.20413	0.498284	0.480255	0.999854	6.34e-05	None
Itch;Wwp1	0.728124	6.46497	0.497679	0.480522	0.999854	6.34e-05	None
Srsf6	-0.710935	6.63881	0.497547	0.48058	0.999854	6.34e-05	None
Rap2c	-0.763028	6.24233	0.49748	0.480609	0.999854	6.34e-05	None
Ywhag	0.562726	9.2584	0.497465	0.480616	0.999854	6.34e-05	None
Atp5f1a	-0.619003	7.6592	0.497337	0.480673	0.999854	6.34e-05	None
Cpn1	-1.07503	6.66997	0.4968	0.48091	0.999854	6.34e-05	None
Rplp1	-0.672803	7.01502	0.496401	0.481086	0.999854	6.34e-05	None
Hspa8	-0.44008	14.0513	0.495905	0.481305	0.999854	6.34e-05	None
Tomm34	-1.61333	4.00984	0.495671	0.481408	0.999854	6.34e-05	Down
Exoc6b	1.41451	3.88503	0.493981	0.482157	0.999854	6.34e-05	None
Nans	-0.758571	6.62042	0.492537	0.482798	0.999854	6.34e-05	None
Serpinb6	1.15169	4.62315	0.490163	0.483855	0.999854	6.34e-05	None
Igf2	0.567119	8.90795	0.48882	0.484454	0.999854	6.34e-05	None
Tmem248	0.66635	7.10605	0.488812	0.484458	0.999854	6.34e-05	None
Fgfrl1	-2.05407	3.52121	0.488467	0.484612	0.999854	6.34e-05	Down
Pld1	0.888906	5.60679	0.488318	0.484678	0.999854	6.34e-05	None
Col6a2	-0.598401	9.0676	0.488059	0.484795	0.999854	6.34e-05	None
Bag2	0.769249	6.13722	0.487107	0.485221	0.999854	6.34e-05	None
Kif23	0.587811	7.57284	0.485453	0.485963	0.999854	6.34e-05	None
Epb41l1;Epb41l2;Epb41l3	-1.66501	3.84179	0.485044	0.486146	0.999854	6.34e-05	Down
A2m	0.449978	14.3148	0.482982	0.487075	0.999854	6.34e-05	None
Tmed7	0.776019	6.01494	0.482811	0.487152	0.999854	6.34e-05	None
Ahnak2	2.03205	3.61986	0.481318	0.487826	0.999854	6.34e-05	Up
Fbln5	-0.581625	8.49041	0.480584	0.488158	0.999854	6.34e-05	None
Gdi1	0.799098	5.93297	0.480372	0.488254	0.999854	6.34e-05	None
Rpl23a	-0.620787	7.13274	0.480064	0.488394	0.999854	6.34e-05	None
Tax1bp1	0.6307	7.69202	0.479922	0.488458	0.999854	6.34e-05	None
Prkar1a	0.628551	6.93407	0.47845	0.489125	0.999854	6.34e-05	None
Myg1	-1.7202	4.36628	0.478055	0.489305	0.999854	6.34e-05	Down
Ackr3	-0.976456	5.23104	0.477258	0.489667	0.999854	6.34e-05	None
Dusp23	-1.68895	4.48685	0.477161	0.489711	0.999854	6.34e-05	Down
Dcbld2	-1.8031	4.13188	0.474737	0.490816	0.999854	6.34e-05	Down
Capzb	-0.572754	8.16273	0.472443	0.491865	0.999854	6.34e-05	None
Tra2a;Tra2b	1.11023	6.19444	0.471364	0.492361	0.999854	6.34e-05	None
Gng7	1.07553	4.81479	0.470673	0.492678	0.999854	6.34e-05	None
Nck2	-1.29664	4.12927	0.4706	0.492711	0.999854	6.34e-05	None
Lama5	-0.748037	6.18576	0.469923	0.493023	0.999854	6.34e-05	None
Rala	0.560587	8.17145	0.469686	0.493132	0.999854	6.34e-05	None
Pfas	-0.778565	6.01739	0.468572	0.493645	0.999854	6.34e-05	None
Rnps1	-1.12683	5.84183	0.468527	0.493666	0.999854	6.34e-05	None
Slc2a2	-1.83321	3.98427	0.4685	0.493678	0.999854	6.34e-05	Down
Tgfbr2	0.653416	6.84135	0.46744	0.494167	0.999854	6.34e-05	None
Acot7	-1.20711	5.31962	0.466722	0.494499	0.999854	6.34e-05	None
Rps7	-0.535466	8.48372	0.466433	0.494633	0.999854	6.34e-05	None
Gpr143	0.675232	7.79904	0.466287	0.4947	0.999854	6.34e-05	None
Tubb3	-0.809907	5.79563	0.465825	0.494914	0.999854	6.34e-05	None
Atxn2l	-1.3708	4.62417	0.465678	0.494982	0.999854	6.34e-05	None
Rasa3	0.590539	7.05745	0.46564	0.495	0.999854	6.34e-05	None
Stk39	1.93314	3.70504	0.465166	0.49522	0.999854	6.34e-05	Up
Sri	0.571118	9.04747	0.464557	0.495502	0.999854	6.34e-05	None
Ube2c	-2.85057	2.2801	0.463974	0.495772	0.999854	6.34e-05	Down
Brs3	-1.09331	6.2141	0.46396	0.495779	0.999854	6.34e-05	None
Cttn	0.569547	7.72132	0.463859	0.495826	0.999854	6.34e-05	None
Sult2a8	-1.12444	6.2269	0.461978	0.496701	0.999854	6.34e-05	None
Il17ra	-0.7935	5.90844	0.460821	0.497241	0.999854	6.34e-05	None
Tarbp1	-2.45664	1.95286	0.460614	0.497337	0.999854	6.34e-05	Down
Cntn1	-0.71702	6.39842	0.459296	0.497953	0.999854	6.34e-05	None
Hspa4	0.553615	7.86285	0.458695	0.498235	0.999854	6.34e-05	None
Bst2	-0.65133	7.26731	0.457514	0.498788	0.999854	6.34e-05	None
Nucks1	-1.26715	4.17313	0.45627	0.499372	0.999854	6.34e-05	None
Gale	-1.12064	5.83359	0.455979	0.499509	0.999854	6.34e-05	None
Rps10	-0.668211	6.53226	0.455814	0.499587	0.999854	6.34e-05	None
Dync1li1	0.560069	7.87668	0.453499	0.500678	0.999854	6.34e-05	None
Glb1	0.695283	6.42962	0.44948	0.502582	0.999854	6.34e-05	None
Npm1	-0.703962	6.57092	0.447984	0.503294	0.999854	6.34e-05	None
Stam2	0.665957	6.58738	0.446844	0.503837	0.999854	6.34e-05	None
Niban2	-0.549619	7.50875	0.445483	0.504488	0.999854	6.34e-05	None
Fah	-1.77739	4.10246	0.442287	0.506021	0.999854	6.34e-05	Down
F8	-1.40976	4.36053	0.441845	0.506233	0.999854	6.34e-05	None
Abcc1	0.645434	6.65645	0.441307	0.506492	0.999854	6.34e-05	None
Vat1	0.522642	9.55306	0.43871	0.507746	0.999854	6.34e-05	None
Arpp19;Ensa	0.765083	5.97656	0.438539	0.507828	0.999854	6.34e-05	None
Hk2	0.670336	6.5253	0.438284	0.507952	0.999854	6.34e-05	None
Cdc37	0.665857	6.47684	0.438052	0.508064	0.999854	6.34e-05	None
Hnrnpc	-1.21838	4.26481	0.436251	0.508938	0.999854	6.34e-05	None
Dpysl3	0.84611	5.53724	0.435904	0.509106	0.999854	6.34e-05	None
Il1rap	0.548999	8.15531	0.433981	0.510042	0.999854	6.34e-05	None
Rtkn	-1.78627	2.79499	0.433499	0.510277	0.999854	6.34e-05	Down
Lrsam1	-1.68002	3.49504	0.433003	0.510519	0.999854	6.34e-05	Down
Akr1b7	0.533103	9.04804	0.43186	0.511078	0.999854	6.34e-05	None
Stard10	2.26846	0.801015	0.430899	0.511548	0.999854	6.34e-05	Up
Apob	0.503435	9.97146	0.430464	0.511762	0.999854	6.34e-05	None
Rhoc	-0.588182	7.64647	0.430205	0.511888	0.999854	6.34e-05	None
Niban1	1.37858	4.49772	0.429001	0.512479	0.999854	6.34e-05	None
Glo1	0.833134	5.57363	0.428349	0.5128	0.999854	6.34e-05	None
Gpx4	-1.42155	4.27473	0.42802	0.512962	0.999854	6.34e-05	None
Plec	-1.20742	5.09247	0.427844	0.513049	0.999854	6.34e-05	None
Micall1	1.83336	1.86987	0.427661	0.513139	0.999854	6.34e-05	Up
Ndrg3	1.06339	10.1821	0.427652	0.513143	0.999854	6.34e-05	None
Rnf13	0.64943	6.95935	0.427525	0.513206	0.999854	6.34e-05	None
Cbs	-1.9432	4.18179	0.427345	0.513295	0.999854	6.34e-05	Down
Dut	1.0168	4.79395	0.42633	0.513795	0.999854	6.34e-05	None
Rplp2	0.549256	7.49234	0.426092	0.513913	0.999854	6.34e-05	None
Mitd1	-0.948523	7.44862	0.425613	0.514149	0.999854	6.34e-05	None
Phpt1	-1.97397	3.26855	0.425299	0.514305	0.999854	6.34e-05	Down
Rpl5	0.520142	9.13538	0.424723	0.51459	0.999854	6.34e-05	None
Eif4a2	-1.07051	6.02254	0.424287	0.514805	0.999854	6.34e-05	None
Fzd1;Fzd2;Fzd7	0.576585	7.17085	0.423533	0.515179	0.999854	6.34e-05	None
Ugcg	0.547323	9.21816	0.422519	0.515683	0.999854	6.34e-05	None
Comt	-1.68467	5.20781	0.42221	0.515836	0.999854	6.34e-05	Down
Cdc42;Rac1;Rac2;Rhog;Rhoj;Rhoq	0.555143	9.33991	0.422011	0.515936	0.999854	6.34e-05	None
F13a1	-0.652985	8.47122	0.420932	0.516472	0.999854	6.34e-05	None
Gjc3	-0.99454	6.80649	0.420833	0.516522	0.999854	6.34e-05	None
Aldh1a1;Aldh1a7	-0.983601	6.88255	0.420244	0.516815	0.999854	6.34e-05	None
Cdk15	1.9953	3.12356	0.420161	0.516857	0.999854	6.34e-05	Up
Thbs1	-0.491091	11.4207	0.419866	0.517004	0.999854	6.34e-05	None
Rhobtb3	0.82673	5.64717	0.419488	0.517193	0.999854	6.34e-05	None
Gna13	0.611198	6.80739	0.419015	0.517429	0.999854	6.34e-05	None
Iap	0.529204	8.22268	0.41846	0.517706	0.999854	6.34e-05	None
Vamp7	0.518604	8.58176	0.418298	0.517787	0.999854	6.34e-05	None
Dtna;Dtnb	1.70951	3.1793	0.418034	0.51792	0.999854	6.34e-05	Up
Man2b2	0.862612	5.42444	0.417817	0.518028	0.999854	6.34e-05	None
Tbcb	2.30809	1.64114	0.417632	0.518121	0.999854	6.34e-05	Up
Akr1b1	0.553261	7.3273	0.4167	0.518588	0.999854	6.34e-05	None
Tspan14	0.496687	10.9833	0.415539	0.519171	0.999854	6.34e-05	None
Lrp4	-1.53447	3.82256	0.414902	0.519492	0.999854	6.34e-05	Down
Galt	-1.21684	5.01534	0.414624	0.519632	0.999854	6.34e-05	None
Cdc42bpa;Cdc42bpb	1.82511	3.73195	0.413279	0.52031	0.999854	6.34e-05	Up
Septin7	0.622064	6.74998	0.412927	0.520488	0.999854	6.34e-05	None
Rnf144a	0.831881	5.49175	0.41242	0.520744	0.999854	6.34e-05	None
Carm1	0.603672	6.72102	0.412057	0.520928	0.999854	6.34e-05	None
Rbm8a	-2.21018	3.31081	0.411904	0.521005	0.999854	6.34e-05	Down
Scarf2	-0.716503	6.10797	0.411696	0.52111	0.999854	6.34e-05	None
Rab8a;Rab8b	0.559006	7.37764	0.411549	0.521184	0.999854	6.34e-05	None
Elapor2	0.708244	6.44446	0.410693	0.521618	0.999854	6.34e-05	None
Krt5;Krt76	-1.67902	3.40865	0.410692	0.521619	0.999854	6.34e-05	Down
Cnnm4	0.696252	6.12641	0.410194	0.521871	0.999854	6.34e-05	None
Itgb6	-0.978844	11.2469	0.40974	0.522102	0.999854	6.34e-05	None
Tfr2	0.55962	10.3248	0.409461	0.522243	0.999854	6.34e-05	None
Gaa	-0.675891	6.63694	0.409269	0.522341	0.999854	6.34e-05	None
Hdac1	-1.10591	5.48326	0.409213	0.522369	0.999854	6.34e-05	None
Rab1A	0.505603	9.10505	0.408916	0.52252	0.999854	6.34e-05	None
Hnrnpa2b1	-1.2612	4.70381	0.407738	0.52312	0.999854	6.34e-05	None
Eps15l1	0.856231	5.36128	0.407162	0.523413	0.999854	6.34e-05	None
Krt5;Krt77	0.60851	7.46223	0.406824	0.523586	0.999854	6.34e-05	None
Eef1d	-2.28498	2.00078	0.40666	0.523669	0.999854	6.34e-05	Down
Ptbp2	-1.06939	5.78593	0.405773	0.524123	0.999854	6.34e-05	None
Golga7	-0.547762	8.72521	0.405664	0.524179	0.999854	6.34e-05	None
Ogt	0.932609	5.02371	0.404515	0.524767	0.999854	6.34e-05	None
Orai1	0.903507	5.20414	0.403759	0.525154	0.999854	6.34e-05	None
Parp12	0.823796	5.45815	0.403224	0.525429	0.999854	6.34e-05	None
Rnf19b	-0.956436	4.99894	0.402797	0.525648	0.999854	6.34e-05	None
Ctbp1	1.24351	4.76212	0.402661	0.525718	0.999854	6.34e-05	None
Ppt1	0.575825	6.96963	0.402246	0.525932	0.999854	6.34e-05	None
Ptprg	0.895855	5.21663	0.401052	0.526546	0.999854	6.34e-05	None
Cyb5r3	-1.09566	5.48834	0.400168	0.527003	0.999854	6.34e-05	None
Ndrg2	-1.8644	3.49997	0.398603	0.527811	0.999854	6.34e-05	Down
Aqp1	1.79952	1.99691	0.397868	0.528193	0.999854	6.34e-05	Up
Plod1	-0.524125	7.85202	0.396217	0.52905	0.999854	6.34e-05	None
Slc1a4	0.575201	7.02749	0.395984	0.52917	0.999854	6.34e-05	None
Pcdhgb2	-0.739548	5.84686	0.395464	0.529441	0.999854	6.34e-05	None
Col4a2	-1.70433	4.90838	0.393867	0.530274	0.999854	6.34e-05	Down
Jup	-1.11885	4.48139	0.392406	0.531037	0.999854	6.34e-05	None
Krt6a;Krt72	-1.78923	3.69638	0.392309	0.531088	0.999854	6.34e-05	Down
P2rx4	-0.986813	6.2343	0.392261	0.531114	0.999854	6.34e-05	None
Clstn1	-0.749021	5.90909	0.391293	0.53162	0.999854	6.34e-05	None
Cul2	-1.99091	3.74862	0.390092	0.532251	0.999854	6.34e-05	Down
Tp53	-1.80395	3.58465	0.389622	0.532498	0.999854	6.34e-05	Down
Matr3	-1.46104	3.92059	0.389521	0.532551	0.999854	6.34e-05	None
Lcp1;Pls3	0.584885	6.9714	0.389033	0.532808	0.999854	6.34e-05	None
Sh3pxd2a	0.747189	5.91743	0.38867	0.532999	0.999854	6.34e-05	None
Tcaf1	-1.43118	4.0758	0.38824	0.533226	0.999854	6.34e-05	None
Plcg2	-0.7261	6.00889	0.387925	0.533392	0.999854	6.34e-05	None
Plxnb1	-0.656688	6.30536	0.387756	0.533482	0.999854	6.34e-05	None
Sirt2	-1.45648	4.75967	0.38709	0.533833	0.999854	6.34e-05	None
App	0.79819	5.83899	0.387063	0.533847	0.999854	6.34e-05	None
Eif4e	-0.800768	5.5917	0.386271	0.534266	0.999854	6.34e-05	None
Ston1	0.752831	5.80323	0.384645	0.535128	0.999854	6.34e-05	None
Ampd2	-0.747491	5.69337	0.383865	0.535542	0.999854	6.34e-05	None
Dnaja1	-0.551014	11.4194	0.3835	0.535736	0.999854	6.34e-05	None
Tmem131	1.57191	3.49449	0.383173	0.53591	0.999854	6.34e-05	Up
Psmd4	-0.811583	5.56522	0.383101	0.535948	0.999854	6.34e-05	None
Gjb2	0.630504	7.07003	0.381661	0.536716	0.999854	6.34e-05	None
Slc16a6	-1.21947	4.7342	0.381372	0.53687	0.999854	6.34e-05	None
Gfm2	0.940873	7.16574	0.380756	0.537199	0.999854	6.34e-05	None
Krt14	-1.25515	4.61951	0.380425	0.537376	0.999854	6.34e-05	None
Stx2	-1.31611	4.32986	0.380237	0.537476	0.999854	6.34e-05	None
Sec16a	2.14832	3.08583	0.379976	0.537616	0.999854	6.34e-05	Up
Dhx30	-1.29486	4.37463	0.379746	0.537739	0.999854	6.34e-05	None
Omd	-0.604228	6.90521	0.379481	0.537881	0.999854	6.34e-05	None
Rps4x	-0.490092	9.35218	0.378913	0.538186	0.999854	6.34e-05	None
Myh10;Myh11;Myh9	-0.650672	6.25883	0.378758	0.538269	0.999854	6.34e-05	None
Rps27;Rps27l	-0.542199	7.07467	0.378398	0.538462	0.999854	6.34e-05	None
Cdh2	-0.54771	7.21033	0.377728	0.538821	0.999854	6.34e-05	None
Slc7a8	1.93952	1.66383	0.377209	0.539101	0.999854	6.34e-05	Up
Hspa1l;Hspa2;Hspa5;Hspa8	0.446063	13.0492	0.376722	0.539363	0.999854	6.34e-05	None
Atox1	0.554593	7.7842	0.376638	0.539408	0.999854	6.34e-05	None
Cd63	0.709667	7.68839	0.376572	0.539443	0.999854	6.34e-05	None
Ppp2ca;Ppp2cb;Ppp4c	-1.36455	4.1544	0.376194	0.539647	0.999854	6.34e-05	None
Mink1	-0.651027	6.22201	0.375773	0.539874	0.999854	6.34e-05	None
Pip4p2	0.530214	8.96739	0.374836	0.54038	0.999854	6.34e-05	None
Ccdc25	-1.89845	2.7938	0.374528	0.540547	0.999854	6.34e-05	Down
Mink1;Tnik	-0.554728	6.9944	0.374504	0.54056	0.999854	6.34e-05	None
Rpl13	-0.566984	8.83979	0.37424	0.540702	0.999854	6.34e-05	None
Frk	0.763177	5.58482	0.372865	0.541447	0.999854	6.34e-05	None
Npc1	-0.489991	8.44811	0.37281	0.541477	0.999854	6.34e-05	None
Eno3	-0.46578	10.1913	0.372609	0.541585	0.999854	6.34e-05	None
Rpn2	-1.12292	5.11779	0.371816	0.542016	0.999854	6.34e-05	None
Nifk	-1.86419	2.985	0.371122	0.542393	0.999854	6.34e-05	Down
Naglu	0.475033	9.7854	0.371079	0.542417	0.999854	6.34e-05	None
Dip2a	-0.526043	7.23904	0.370133	0.542932	0.999854	6.34e-05	None
Icam2	0.905302	5.21358	0.368312	0.543926	0.999854	6.34e-05	None
Josd2	-0.797423	5.4067	0.367744	0.544237	0.999854	6.34e-05	None
Eef1a1	0.411824	12.5794	0.367186	0.544542	0.999854	6.34e-05	None
Mapk1	0.488283	8.2221	0.367142	0.544566	0.999854	6.34e-05	None
Tm9sf3	0.633057	6.28394	0.366475	0.544932	0.999854	6.34e-05	None
Lgals9	0.522141	7.22862	0.366049	0.545166	0.999854	6.34e-05	None
Slc7a1	0.476047	10.3107	0.365623	0.5454	0.999854	6.34e-05	None
Anxa11	-0.461003	10.3554	0.364536	0.545998	0.999854	6.34e-05	None
Aplp2	-1.85228	2.96455	0.363912	0.546342	0.999854	6.34e-05	Down
Psme1	2.15948	2.39648	0.363754	0.546429	0.999854	6.34e-05	Up
Hexa	0.572931	6.7939	0.363665	0.546478	0.999854	6.34e-05	None
Slc12a7	0.48195	9.38131	0.363548	0.546542	0.999854	6.34e-05	None
Ppp2r5d	1.37185	4.02915	0.362691	0.547016	0.999854	6.34e-05	None
Sec24b	-1.80455	3.30512	0.362637	0.547046	0.999854	6.34e-05	Down
Ryk	0.617551	6.67108	0.36261	0.54706	0.999854	6.34e-05	None
Cldn12	-0.613016	7.77827	0.362439	0.547155	0.999854	6.34e-05	None
Snu13	-1.04043	4.40489	0.362073	0.547357	0.999854	6.34e-05	None
Slc30a1	0.544604	7.09189	0.361865	0.547472	0.999854	6.34e-05	None
Slc9a1	1.44321	3.76381	0.361694	0.547567	0.999854	6.34e-05	None
Krt85	2.33698	3.43784	0.361066	0.547915	0.999854	6.34e-05	Up
Strn	-1.41177	3.8631	0.360243	0.548371	0.999854	6.34e-05	None
Anxa6	0.490954	8.4839	0.359599	0.548729	0.999854	6.34e-05	None
Lxn	1.34318	3.37753	0.359098	0.549008	0.999854	6.34e-05	None
Dpys	0.547921	7.03363	0.358301	0.549451	0.999854	6.34e-05	None
Uap1	-0.860942	5.15046	0.356757	0.550313	0.999854	6.34e-05	None
Myo1c	-0.476859	8.4271	0.356452	0.550483	0.999854	6.34e-05	None
F13b	-0.481794	9.38662	0.356144	0.550656	0.999854	6.34e-05	None
Rnf11	-0.542797	7.50079	0.354073	0.551817	0.999854	6.34e-05	None
Ptprd	-0.659528	6.24866	0.353001	0.55242	0.999854	6.34e-05	None
Fbxw11	-1.3015	4.22379	0.352634	0.552626	0.999854	6.34e-05	None
Kif2c	-0.992144	4.57572	0.352252	0.552841	0.999854	6.34e-05	None
Hmcn1	-0.446655	11.5391	0.351967	0.553002	0.999854	6.34e-05	None
Cbx5	-2.1182	1.79287	0.351873	0.553055	0.999854	6.34e-05	Down
Ap2s1	-1.30365	4.2098	0.351496	0.553267	0.999854	6.34e-05	None
Uba2	-2.11596	2.20354	0.351086	0.553499	0.999854	6.34e-05	Down
Cops3	-0.761285	5.58688	0.350174	0.554015	0.999854	6.34e-05	None
B4gat1	-1.19755	4.68052	0.349735	0.554263	0.999854	6.34e-05	None
Akap2	0.796759	5.32643	0.349186	0.554574	0.999854	6.34e-05	None
FAM120A	0.629134	6.19692	0.349031	0.554662	0.999854	6.34e-05	None
Atp6ap2	-0.630246	6.21351	0.348871	0.554753	0.999854	6.34e-05	None
Mlst8	-1.65659	3.71817	0.348536	0.554943	0.999854	6.34e-05	Down
Actn1	-0.617282	6.2919	0.348383	0.55503	0.999854	6.34e-05	None
Smpd1	-1.1534	4.78816	0.348065	0.555211	0.999854	6.34e-05	None
Ptprm	0.526903	7.3087	0.34763	0.555458	0.999854	6.34e-05	None
Gspt1	0.641546	6.21117	0.347161	0.555725	0.999854	6.34e-05	None
Rab22a;Rab31	-0.527553	8.54988	0.34696	0.555839	0.999854	6.34e-05	None
Vps37c	-0.509598	7.88275	0.346582	0.556054	0.999854	6.34e-05	None
Nell2	-1.00066	4.54464	0.346448	0.556131	0.999854	6.34e-05	None
Hars1	0.932254	4.75769	0.346049	0.556358	0.999854	6.34e-05	None
Ddx3x	0.463616	8.1904	0.345517	0.556662	0.999854	6.34e-05	None
Plekhb2	-0.875112	9.32791	0.345212	0.556836	0.999854	6.34e-05	None
Aox1	-0.911748	6.51052	0.344721	0.557117	0.999854	6.34e-05	None
Flvcr1	-1.32837	4.06825	0.344503	0.557241	0.999854	6.34e-05	None
Plxnb2;Plxnd1	1.23582	4.44593	0.34428	0.557369	0.999854	6.34e-05	None
Dmxl2	2.08528	2.00097	0.344165	0.557435	0.999854	6.34e-05	Up
Cct6b	-1.60585	2.42599	0.343092	0.55805	0.999854	6.34e-05	Down
Mbp	-0.670885	5.89298	0.342963	0.558124	0.999854	6.34e-05	None
Ehd2	-0.625478	6.22843	0.342816	0.558208	0.999854	6.34e-05	None
Antxr1;Antxr2	-0.94757	6.00398	0.341605	0.558904	0.999854	6.34e-05	None
Hip1	-0.499376	7.27702	0.341499	0.558965	0.999854	6.34e-05	None
Dnajb6	-0.552111	6.95096	0.340812	0.559361	0.999854	6.34e-05	None
Plxna1;Plxna2	0.628051	6.83461	0.340674	0.55944	0.999854	6.34e-05	None
Cnn2;Cnn3	0.694103	5.87114	0.340412	0.559591	0.999854	6.34e-05	None
Eif6	-1.03673	5.27404	0.340204	0.559711	0.999854	6.34e-05	None
Kpna2	-0.614467	6.56066	0.339829	0.559928	0.999854	6.34e-05	None
Gsn	-0.463648	10.6805	0.339822	0.559932	0.999854	6.34e-05	None
Ehd4	-0.462933	8.49146	0.339338	0.560211	0.999854	6.34e-05	None
Eno1	0.437706	10.7007	0.33871	0.560575	0.999854	6.34e-05	None
Psmd14	0.487203	7.58214	0.338275	0.560827	0.999854	6.34e-05	None
Slc44a2	-0.482924	8.46353	0.338006	0.560982	0.999854	6.34e-05	None
Tmem168	0.75937	5.44029	0.33793	0.561027	0.999854	6.34e-05	None
Slc45a4	-1.72823	3.33683	0.335034	0.56271	0.999854	6.34e-05	Down
Gdi1;Gdi2	0.45932	8.23971	0.333685	0.563497	0.999854	6.34e-05	None
Eng	0.421885	11.7737	0.332668	0.564092	0.999854	6.34e-05	None
Caprin1	0.80319	5.22233	0.332184	0.564376	0.999854	6.34e-05	None
Pkhd1l1	-0.968108	4.52708	0.331758	0.564626	0.999854	6.34e-05	None
Rhbdf2	0.683123	5.92146	0.331446	0.564809	0.999854	6.34e-05	None
Ythdf2	0.807723	5.1763	0.330748	0.565219	0.999854	6.34e-05	None
Sfpq	-0.997122	5.51385	0.3307	0.565247	0.999854	6.34e-05	None
Rab4b	0.634584	6.29495	0.330492	0.56537	0.999854	6.34e-05	None
Ap1b1	0.529648	6.93859	0.330385	0.565433	0.999854	6.34e-05	None
Tyro3	-1.25801	4.19573	0.330318	0.565472	0.999854	6.34e-05	None
Abca1	0.688805	5.97511	0.32842	0.566591	0.999854	6.34e-05	None
Nt5c2	-1.46093	4.25262	0.327684	0.567026	0.999854	6.34e-05	None
Dcps	1.09248	4.08625	0.326721	0.567596	0.999854	6.34e-05	None
Gclc	-0.893603	4.80178	0.326295	0.567849	0.999854	6.34e-05	None
Ptp4a1;Ptp4a2	0.592292	6.58746	0.32607	0.567982	0.999854	6.34e-05	None
Srgap2	-1.19412	4.44394	0.325943	0.568058	0.999854	6.34e-05	None
Nme2	0.536035	6.87659	0.324994	0.568622	0.999854	6.34e-05	None
Mydgf	1.63658	3.56127	0.324977	0.568632	0.999854	6.34e-05	Up
Ppib	0.457837	8.02564	0.324797	0.568739	0.999854	6.34e-05	None
Nedd8	-0.99491	5.45507	0.322363	0.570191	0.999854	6.34e-05	None
F3	-0.623972	6.42008	0.321955	0.570435	0.999854	6.34e-05	None
Tgfa	1.6387	3.67787	0.321945	0.570441	0.999854	6.34e-05	Up
Zyx	-0.809385	5.13301	0.32156	0.570672	0.999854	6.34e-05	None
Slc22a27	-0.995972	5.40888	0.321539	0.570684	0.999854	6.34e-05	None
Rragc	0.847411	4.96492	0.321016	0.570998	0.999854	6.34e-05	None
Ldlr	-0.459519	9.53668	0.32082	0.571115	0.999854	6.34e-05	None
Qsox2	-1.488	4.07025	0.320428	0.571351	0.999854	6.34e-05	None
Ap1b1;Ap2b1	0.468079	7.82446	0.32003	0.57159	0.999854	6.34e-05	None
Hnrnpk	-0.48224	7.21323	0.319709	0.571782	0.999854	6.34e-05	None
Ppp2r1a	0.472049	7.53238	0.319649	0.571819	0.999854	6.34e-05	None
Elob	0.529241	7.01999	0.319307	0.572025	0.999854	6.34e-05	None
Gjc1	-0.88659	6.44878	0.317761	0.572956	0.999854	6.34e-05	None
Myo7a	0.453709	7.89872	0.317461	0.573138	0.999854	6.34e-05	None
Rnpep	-0.954703	5.61309	0.316792	0.573542	0.999854	6.34e-05	None
Reep5	0.991639	5.41749	0.314393	0.574997	0.999854	6.34e-05	None
Postn	0.45998	8.96361	0.313983	0.575246	0.999854	6.34e-05	None
Atp5po	-1.67306	3.34959	0.313798	0.575359	0.999854	6.34e-05	Down
Krt14;Krt16	-0.948862	6.5318	0.313697	0.57542	0.999854	6.34e-05	None
Ptgr1	0.824258	7.89683	0.313484	0.57555	0.999854	6.34e-05	None
Rpl38	0.529692	7.2522	0.313034	0.575824	0.999854	6.34e-05	None
Carhsp1	-1.21522	3.5608	0.312309	0.576267	0.999854	6.34e-05	None
Rheb	0.510533	6.94067	0.311433	0.576802	0.999854	6.34e-05	None
Dctn3	1.70161	3.97937	0.309944	0.577714	0.999854	6.34e-05	Up
Tm9sf1	-1.65566	3.41945	0.309828	0.577786	0.999854	6.34e-05	Down
Gpd1	-0.945016	5.57362	0.309044	0.578268	0.999854	6.34e-05	None
Serinc1	-0.432781	10.601	0.308956	0.578322	0.999854	6.34e-05	None
Braf;Raf1	1.80541	3.62486	0.308921	0.578343	0.999854	6.34e-05	Up
Faf1	0.723572	5.4902	0.30858	0.578553	0.999854	6.34e-05	None
Stk38	0.794441	5.14929	0.308399	0.578664	0.999854	6.34e-05	None
C1ra	-0.446768	8.48861	0.306978	0.579541	0.999854	6.34e-05	None
Prkcb	1.51879	4.64743	0.306935	0.579567	0.999854	6.34e-05	Up
Lrp6	-0.549599	6.53109	0.305645	0.580365	0.999854	6.34e-05	None
Lgals1	0.465892	8.71325	0.305132	0.580683	0.999854	6.34e-05	None
Ankrd50	-1.67174	3.12087	0.304756	0.580916	0.999854	6.34e-05	Down
Fabp5	0.444523	8.11812	0.304601	0.581012	0.999854	6.34e-05	None
Zdhhc18	-1.1672	4.37019	0.303994	0.581389	0.999854	6.34e-05	None
Rasa1	-1.55421	3.64935	0.30327	0.58184	0.999854	6.34e-05	Down
Prl7c1	-0.50072	9.94847	0.30258	0.58227	0.999854	6.34e-05	None
Kct2	0.463216	11.2913	0.301743	0.582792	0.999854	6.34e-05	None
Ppp1ca;Ppp1cb;Ppp1cc	0.487301	7.10124	0.301166	0.583152	0.999854	6.34e-05	None
Rab6a	-0.488646	7.096	0.300744	0.583417	0.999854	6.34e-05	None
Ndfip1	0.456106	7.96699	0.299978	0.583896	0.999854	6.34e-05	None
Pik3r4	0.991025	4.33685	0.299644	0.584105	0.999854	6.34e-05	None
Phlda1	0.586563	6.20104	0.299448	0.584229	0.999854	6.34e-05	None
Myo6	0.98092	4.28472	0.299086	0.584456	0.999854	6.34e-05	None
Sphk1	1.50445	2.65143	0.298993	0.584514	0.999854	6.34e-05	Up
Aldoa	0.425301	9.73347	0.298805	0.584632	0.999854	6.34e-05	None
Kiaa0319l	0.647864	5.92557	0.298227	0.584996	0.999854	6.34e-05	None
Map4k4	-1.37651	4.31253	0.2977	0.585328	0.999854	6.34e-05	None
Eef1b	-0.533178	7.0042	0.296198	0.586276	0.999854	6.34e-05	None
Lcp1	-0.590675	6.17064	0.295676	0.586606	0.999854	6.34e-05	None
Cdo1	-1.55402	5.65994	0.294846	0.587132	0.999854	6.34e-05	Down
Tacc3	0.827442	5.02107	0.293396	0.588052	0.999854	6.34e-05	None
Yipf3	0.730884	5.31286	0.293211	0.58817	0.999854	6.34e-05	None
Metap1	0.823814	4.86963	0.293201	0.588177	0.999854	6.34e-05	None
Sfn;Ywhab;Ywhae;Ywhag;Ywhah;Ywhaq;Ywhaz	-0.421259	10.5081	0.293098	0.588242	0.999854	6.34e-05	None
Nudt5	-1.55435	4.34161	0.292816	0.588422	0.999854	6.34e-05	Down
Mdfic	0.948465	5.74867	0.292545	0.588595	0.999854	6.34e-05	None
Ezr;Msn;Rdx	-0.425973	9.54484	0.292543	0.588595	0.999854	6.34e-05	None
Fyn;Hck;Lyn;Src;Yes1	0.618722	6.17091	0.292385	0.588696	0.999854	6.34e-05	None
Dip2a;Dip2b	-0.465467	7.77449	0.292334	0.588729	0.999854	6.34e-05	None
Adamts1	-0.460093	7.65078	0.292334	0.588729	0.999854	6.34e-05	None
Lipa	0.793156	5.22085	0.291944	0.588977	0.999854	6.34e-05	None
Serpinc1	0.435104	11.2476	0.291917	0.588994	0.999854	6.34e-05	None
Dcaf7	0.783142	5.05075	0.290414	0.589956	0.999854	6.34e-05	None
Grk6	0.888926	4.58497	0.290378	0.589978	0.999854	6.34e-05	None
Plpp3	0.651986	5.65065	0.289586	0.590486	0.999854	6.34e-05	None
Ythdf1;Ythdf2;Ythdf3	-0.833921	6.41279	0.289377	0.59062	0.999854	6.34e-05	None
Capza1	0.418315	8.56331	0.289349	0.590638	0.999854	6.34e-05	None
Cdh19	-1.2156	4.97813	0.28931	0.590663	0.999854	6.34e-05	None
Gna11	0.431488	8.56686	0.28928	0.590682	0.999854	6.34e-05	None
Dclk1	-1.42313	4.02434	0.289179	0.590747	0.999854	6.34e-05	None
Fasn	0.423649	8.51261	0.288591	0.591125	0.999854	6.34e-05	None
Ostf1	0.699347	5.66752	0.288252	0.591343	0.999854	6.34e-05	None
Mob1a;Mob1b	-0.800553	6.96656	0.288153	0.591406	0.999854	6.34e-05	None
Mfge8	-0.379099	11.6848	0.287665	0.591721	0.999854	6.34e-05	None
Ilf2	0.484004	7.00174	0.287554	0.591792	0.999854	6.34e-05	None
Slc2a8	-1.28911	3.74339	0.287415	0.591882	0.999854	6.34e-05	None
Oit3	-0.806832	4.97283	0.287078	0.592099	0.999854	6.34e-05	None
Ugp2	0.426138	8.36556	0.287055	0.592114	0.999854	6.34e-05	None
Polr1b	-1.87442	2.90094	0.286793	0.592283	0.999854	6.34e-05	Down
Bzw1	0.597041	6.06443	0.286541	0.592446	0.999854	6.34e-05	None
Tmem9	-0.925804	5.79816	0.286368	0.592558	0.999854	6.34e-05	None
Cops2	-0.732363	5.30018	0.286246	0.592636	0.999854	6.34e-05	None
Gng2	-0.894745	5.6498	0.285676	0.593005	0.999854	6.34e-05	None
Ltbp4	-0.935365	5.63625	0.285044	0.593414	0.999854	6.34e-05	None
Eps8	0.43014	8.13234	0.284587	0.59371	0.999854	6.34e-05	None
Ap1m1	-1.14883	4.25374	0.283796	0.594224	0.999854	6.34e-05	None
Rps16	-0.426872	9.47792	0.283756	0.59425	0.999854	6.34e-05	None
Grcc10	-0.884324	4.61708	0.283554	0.594381	0.999854	6.34e-05	None
Adss2	0.689181	5.48787	0.283338	0.594522	0.999854	6.34e-05	None
Itih3	-0.397074	11.1364	0.282895	0.59481	0.999854	6.34e-05	None
Col5a1	-0.809256	6.70606	0.282787	0.59488	0.999854	6.34e-05	None
Usp9y	-1.2117	4.98303	0.282543	0.595039	0.999854	6.34e-05	None
Cad;Cps1	-1.10144	6.01495	0.282379	0.595146	0.999854	6.34e-05	None
Prdx2	0.46582	7.26959	0.282204	0.59526	0.999854	6.34e-05	None
Sumo2	0.538794	6.58271	0.281815	0.595514	0.999854	6.34e-05	None
Polr2a	-1.8816	2.55932	0.281219	0.595904	0.999854	6.34e-05	Down
Ubap1	0.476878	7.25405	0.280793	0.596182	0.999854	6.34e-05	None
Hspa4;Hsph1	-0.447473	7.50492	0.280249	0.596538	0.999854	6.34e-05	None
Slc4a2	0.437791	7.82761	0.280069	0.596656	0.999854	6.34e-05	None
Akr1c6	-1.13366	5.35732	0.279628	0.596945	0.999854	6.34e-05	None
Cnp	0.525747	6.60378	0.279439	0.597069	0.999854	6.34e-05	None
Utp20	-2.084	0.916122	0.277692	0.598218	0.999854	6.34e-05	Down
Wdr11	-1.638	2.59083	0.277126	0.598591	0.999854	6.34e-05	Down
Cav2	-1.08335	4.51976	0.276639	0.598913	0.999854	6.34e-05	None
Cand1;Cand2	2.07196	3.26063	0.276579	0.598952	0.999854	6.34e-05	Up
Scamp1	0.411758	8.23047	0.276384	0.599081	0.999854	6.34e-05	None
Rac1;Rac2	-0.431406	11.0532	0.2759	0.599401	0.999854	6.34e-05	None
Gca	-1.34067	3.53126	0.275333	0.599777	0.999854	6.34e-05	None
Mrgpre	-0.819583	6.52252	0.275314	0.599789	0.999854	6.34e-05	None
Cct6a;Cct6b	-0.440902	7.9855	0.275096	0.599934	0.999854	6.34e-05	None
Rpl7a	-0.407567	8.77432	0.274649	0.60023	0.999854	6.34e-05	None
Bzw2	-1.37658	4.06985	0.274147	0.600563	0.999854	6.34e-05	None
Mark2;Mark3	-0.764264	7.16288	0.27342	0.601047	0.999854	6.34e-05	None
Taok2	-1.0321	4.9598	0.273341	0.6011	0.999854	6.34e-05	None
Dek	-1.64454	3.79565	0.273239	0.601167	0.999854	6.34e-05	Down
Aurkb	0.580967	6.07618	0.272913	0.601385	0.999854	6.34e-05	None
H2bc21;H2bu1;Hist3h2ba	-0.699297	5.31115	0.272822	0.601445	0.999854	6.34e-05	None
Gdpd1	0.911976	4.35967	0.272626	0.601576	0.999854	6.34e-05	None
Prpf40a	-0.95873	5.11903	0.271363	0.602419	0.999854	6.34e-05	None
Cul1	0.603687	5.87205	0.270487	0.603006	0.999854	6.34e-05	None
Spast	-0.760055	5.00278	0.26984	0.603439	0.999854	6.34e-05	None
Hnrnph1	-0.857747	5.76841	0.269819	0.603453	0.999854	6.34e-05	None
Eif3k	0.554082	6.25811	0.269812	0.603458	0.999854	6.34e-05	None
Prdx6	-0.510627	7.04863	0.269321	0.603788	0.999854	6.34e-05	None
Ptp4a3	0.759724	5.03359	0.2692	0.603869	0.999854	6.34e-05	None
Igf2bp3	-0.777471	4.946	0.269	0.604003	0.999854	6.34e-05	None
Grn	-0.506039	6.84036	0.268306	0.60447	0.999854	6.34e-05	None
Idh1;Idh2	0.859527	6.15947	0.268171	0.604562	0.999854	6.34e-05	None
Itga1	0.482188	6.81377	0.268085	0.604619	0.999854	6.34e-05	None
Ostc	1.02945	3.91538	0.26777	0.604832	0.999854	6.34e-05	None
Paip1	-1.47203	4.37326	0.267557	0.604975	0.999854	6.34e-05	None
Ube2f	-1.58626	2.96337	0.267278	0.605164	0.999854	6.34e-05	Down
Ywhah	0.427894	8.09899	0.266544	0.605659	0.999854	6.34e-05	None
Celf1;Celf2	-1.02893	4.65709	0.266291	0.60583	0.999854	6.34e-05	None
Psmc3	0.438734	7.72906	0.266151	0.605926	0.999854	6.34e-05	None
Kif21b	-1.086	4.40666	0.26594	0.606069	0.999854	6.34e-05	None
Ubl4a	-1.52	3.43738	0.265725	0.606214	0.999854	6.34e-05	Down
Sdc3	1.76432	3.24675	0.265469	0.606387	0.999854	6.34e-05	Up
Serpina3g	2.10307	2.53561	0.265123	0.606622	0.999854	6.34e-05	Up
Tnpo3	0.684189	5.34546	0.264878	0.606788	0.999854	6.34e-05	None
Impdh2	0.474552	6.87623	0.264661	0.606936	0.999854	6.34e-05	None
Bpnt1	0.555502	6.14267	0.264208	0.607244	0.999854	6.34e-05	None
Slc12a9	0.68436	5.4246	0.264127	0.607299	0.999854	6.34e-05	None
Dock1	-1.19999	4.00685	0.264008	0.60738	0.999854	6.34e-05	None
Fkbp6	0.40252	9.48314	0.263386	0.607803	0.999854	6.34e-05	None
Znrf3	-0.592955	5.92335	0.26296	0.608094	0.999854	6.34e-05	None
Psenen	-1.19554	4.7945	0.262456	0.608438	0.999854	6.34e-05	None
Cul4a	-1.13438	4.14416	0.262109	0.608675	0.999854	6.34e-05	None
Hspa1a;Hspa1b	-0.413489	8.3905	0.262062	0.608707	0.999854	6.34e-05	None
F11	0.474428	7.09234	0.261544	0.609061	0.999854	6.34e-05	None
Rpa3	-1.14258	4.11014	0.261354	0.609191	0.999854	6.34e-05	None
Aldoa;Aldoc	0.501275	7.61347	0.260722	0.609625	0.999854	6.34e-05	None
Scamp5	0.845516	5.76854	0.260695	0.609643	0.999854	6.34e-05	None
Psat1	0.400326	8.35195	0.260481	0.60979	0.999854	6.34e-05	None
Bace1	0.511811	6.65612	0.26028	0.609928	0.999854	6.34e-05	None
Tspan6	0.387063	10.5387	0.259729	0.610306	0.999854	6.34e-05	None
Atg4b	-1.13938	4.13013	0.259693	0.610331	0.999854	6.34e-05	None
H2bc12;H2bc14;H2bc3;H2bc4;H2bc7;H2bc9;Hist1h2bp;Hist2h2bb	-0.387285	10.8901	0.258628	0.611064	0.999854	6.34e-05	None
Sirpa	-0.752889	7.48445	0.258575	0.611101	0.999854	6.34e-05	None
Pcbp2	0.373333	11.3743	0.258542	0.611123	0.999854	6.34e-05	None
Rnh1	0.572582	5.99385	0.25846	0.61118	0.999854	6.34e-05	None
Upf1	-0.413594	7.93263	0.258104	0.611426	0.999854	6.34e-05	None
Ptbp1;Ptbp3	0.550368	6.11686	0.257849	0.611602	0.999854	6.34e-05	None
Baz1b	-1.55886	2.80001	0.257748	0.611671	0.999854	6.34e-05	Down
Nek7	-1.10018	4.24736	0.257329	0.611961	0.999854	6.34e-05	None
Clasp2	0.834203	4.60367	0.257223	0.612035	0.999854	6.34e-05	None
Gnb1	-0.411622	11.116	0.257079	0.612134	0.999854	6.34e-05	None
Eif5b	0.534022	6.24397	0.256731	0.612375	0.999854	6.34e-05	None
Nmt1;Nmt2	1.7632	2.96383	0.256709	0.61239	0.999854	6.34e-05	Up
Atp2c1	0.502294	6.66399	0.255742	0.613061	0.999854	6.34e-05	None
Arpc5	0.912515	5.29467	0.255346	0.613336	0.999854	6.34e-05	None
Rrm2	-1.16174	3.93266	0.253817	0.6144	0.999854	6.34e-05	None
Tollip	-0.393385	8.30915	0.253165	0.614855	0.999854	6.34e-05	None
Man2b1	-0.888893	5.30044	0.250997	0.616374	0.999854	6.34e-05	None
Kynu	-1.54808	2.78215	0.250831	0.61649	0.999854	6.34e-05	Down
Lrrc8c	-1.38077	3.76824	0.250622	0.616638	0.999854	6.34e-05	None
Sec23ip	0.573968	5.94117	0.250493	0.616728	0.999854	6.34e-05	None
Ass1	0.385998	9.90447	0.250449	0.616759	0.999854	6.34e-05	None
Nes	-1.17909	7.80735	0.250181	0.616948	0.999854	6.34e-05	None
Afdn	0.450865	7.02464	0.250133	0.616982	0.999854	6.34e-05	None
Sh3bgrl	-1.29594	4.13936	0.249521	0.617413	0.999854	6.34e-05	None
Itch;Wwp1;Wwp2	-0.492314	7.18772	0.249113	0.6177	0.999854	6.34e-05	None
Slc39a7	-1.47902	4.13131	0.249092	0.617715	0.999854	6.34e-05	None
Smarca4	-1.50941	3.15284	0.248612	0.618054	0.999854	6.34e-05	Down
C4b	-0.376229	11.2236	0.248475	0.618151	0.999854	6.34e-05	None
Prkag1	0.745087	4.98935	0.248422	0.618189	0.999854	6.34e-05	None
Col1a1	-0.400727	8.84881	0.248042	0.618457	0.999854	6.34e-05	None
Stmn1;Stmn2	-1.10771	5.11383	0.247763	0.618655	0.999854	6.34e-05	None
Dusp9	-1.32316	3.09009	0.24769	0.618706	0.999854	6.34e-05	None
Fam126b	-1.54787	2.62757	0.247634	0.618746	0.999854	6.34e-05	Down
Plpp2	1.24823	4.3474	0.247448	0.618878	0.999854	6.34e-05	None
Slc2a5	-0.432783	7.59926	0.247151	0.619088	0.999854	6.34e-05	None
Syt11	0.430161	8.09321	0.246672	0.619428	0.999854	6.34e-05	None
Ralb	0.393236	9.46093	0.245753	0.620082	0.999854	6.34e-05	None
Nudt9	-1.52567	2.88235	0.245495	0.620265	0.999854	6.34e-05	Down
Mars1	0.520871	6.35745	0.24459	0.620911	0.999854	6.34e-05	None
Smurf2	-0.431556	7.02138	0.244526	0.620956	0.999854	6.34e-05	None
Usp14	0.744246	4.95867	0.244333	0.621094	0.999854	6.34e-05	None
Rbp1	-1.48555	3.27498	0.244238	0.621162	0.999854	6.34e-05	None
Picalm	-0.982456	4.97737	0.244051	0.621295	0.999854	6.34e-05	None
Palm	0.515778	6.44192	0.242026	0.622747	0.999854	6.34e-05	None
Cfl1;Cfl2	-0.44507	11.5506	0.242023	0.622749	0.999854	6.34e-05	None
Jtb	0.606997	5.64812	0.241546	0.623092	0.999854	6.34e-05	None
Pdia4	0.540908	6.10636	0.24148	0.623139	0.999854	6.34e-05	None
Shcbp1	0.738097	4.91292	0.240883	0.623569	0.999854	6.34e-05	None
Ltbp1	-1.18078	3.72747	0.240566	0.623798	0.999854	6.34e-05	None
Tgfbr1	-0.407631	7.74893	0.24022	0.624047	0.999854	6.34e-05	None
Rpn1	0.395119	8.07565	0.239358	0.62467	0.999854	6.34e-05	None
Lamtor5	-0.941538	4.81216	0.23833	0.625415	0.999854	6.34e-05	None
Ywhae	0.383645	9.31964	0.238275	0.625455	0.999854	6.34e-05	None
Mpp6	0.405657	7.59821	0.237704	0.625869	0.999854	6.34e-05	None
Unc5b;Unc5c	0.437146	7.47554	0.237633	0.625921	0.999854	6.34e-05	None
Lrrc32	-1.72758	2.33446	0.237372	0.626111	0.999854	6.34e-05	Down
Ak2	-1.31378	2.80151	0.23733	0.626141	0.999854	6.34e-05	None
Ckap5	1.11497	4.00139	0.237168	0.626259	0.999854	6.34e-05	None
Hprt1	0.454526	6.80186	0.237113	0.626299	0.999854	6.34e-05	None
Lrp1	-0.391404	8.55244	0.236964	0.626407	0.999854	6.34e-05	None
Set	-0.981004	4.57961	0.236855	0.626487	0.999854	6.34e-05	None
Mras	1.14523	2.87481	0.236807	0.626522	0.999854	6.34e-05	None
Vcl	0.416044	7.30709	0.235852	0.627218	0.999854	6.34e-05	None
Chpf	-0.389346	8.18851	0.23424	0.628398	0.999854	6.34e-05	None
Krt5	-0.423638	9.21225	0.234022	0.628558	0.999854	6.34e-05	None
Ddah2	0.51817	6.18969	0.233648	0.628832	0.999854	6.34e-05	None
Cbwd1	1.71307	2.39218	0.233628	0.628847	0.999854	6.34e-05	Up
Sema4c	0.455375	7.54816	0.233429	0.628993	0.999854	6.34e-05	None
Slc43a2	0.722363	5.03494	0.233357	0.629046	0.999854	6.34e-05	None
Bace2	0.389194	8.96804	0.233089	0.629243	0.999854	6.34e-05	None
Lrba	-1.2731	3.06864	0.233053	0.629269	0.999854	6.34e-05	None
Hint1	0.430647	7.77101	0.232945	0.629349	0.999854	6.34e-05	None
Nop14	-1.49413	2.16882	0.232449	0.629714	0.999854	6.34e-05	None
Rap1a;Rap1b	-0.365991	11.7358	0.231299	0.630563	0.999854	6.34e-05	None
Axl	0.921112	4.04241	0.231125	0.630691	0.999854	6.34e-05	None
Rhoa;Rhob;Rhoc	0.713317	7.39515	0.231052	0.630745	0.999854	6.34e-05	None
Vps26a	0.5527	5.91522	0.23102	0.630769	0.999854	6.34e-05	None
Vps4b	-0.378692	9.52765	0.230977	0.6308	0.999854	6.34e-05	None
Lrp1;Lrp5;Lrp6	-1.02166	4.35254	0.230857	0.630889	0.999854	6.34e-05	None
Rps24	-0.384641	8.71072	0.230714	0.630995	0.999854	6.34e-05	None
Fn3krp	-1.03999	5.38111	0.230282	0.631315	0.999854	6.34e-05	None
Gpr107	-0.794767	5.74038	0.229571	0.631842	0.999854	6.34e-05	None
Itpa	0.926033	4.84605	0.229276	0.632061	0.999854	6.34e-05	None
Fmnl2;Fmnl3	-0.519291	6.12871	0.228632	0.63254	0.999854	6.34e-05	None
Tuba4a	-0.406488	11.5175	0.228249	0.632826	0.999854	6.34e-05	None
Tfpi	-0.546839	6.13774	0.227958	0.633042	0.999854	6.34e-05	None
Chmp1b1;Chmp1b2	-0.418994	9.50879	0.227896	0.633088	0.999854	6.34e-05	None
Ckb	0.41953	8.68292	0.22771	0.633227	0.999854	6.34e-05	None
Hdgfl2	-1.31411	1.92427	0.226092	0.634437	0.999854	6.34e-05	None
Rpl21	-0.451959	7.33546	0.225729	0.634709	0.999854	6.34e-05	None
Rab5a;Rab5b;Rab5c	0.405802	10.2363	0.225606	0.634801	0.999854	6.34e-05	None
Chpf2	0.444002	7.36048	0.225598	0.634807	0.999854	6.34e-05	None
Jam3	0.377386	8.62513	0.225529	0.634859	0.999854	6.34e-05	None
Psmb4	0.533688	6.66067	0.225396	0.634959	0.999854	6.34e-05	None
Mt1	0.390156	8.30216	0.22515	0.635143	0.999854	6.34e-05	None
Dlat	1.29108	2.80447	0.224906	0.635327	0.999854	6.34e-05	None
Josd1	0.511578	6.17957	0.224465	0.635659	0.999854	6.34e-05	None
Rhoa	0.371194	10.3471	0.224128	0.635912	0.999854	6.34e-05	None
Slc12a2	0.418064	7.30618	0.223812	0.636151	0.999854	6.34e-05	None
Atp11b	0.693739	5.03422	0.223771	0.636181	0.999854	6.34e-05	None
Zzef1	0.554582	5.9047	0.222647	0.637031	0.999854	6.34e-05	None
Tgm1	-1.47567	2.53902	0.222631	0.637043	0.999854	6.34e-05	None
Tapt1	-1.45513	2.66234	0.222013	0.63751	0.999854	6.34e-05	None
Colgalt1	0.428484	7.01335	0.221744	0.637714	0.999854	6.34e-05	None
Stambp	-0.437684	6.83724	0.221049	0.638242	0.999854	6.34e-05	None
Gpr137b	0.406861	7.47715	0.220561	0.638613	0.999854	6.34e-05	None
Nomo1	-0.699202	7.2539	0.220305	0.638808	0.999854	6.34e-05	None
Ccdc178	1.12623	3.74985	0.219504	0.639418	0.999854	6.34e-05	None
Vac14	-1.223	3.3192	0.218955	0.639837	0.999854	6.34e-05	None
Tatdn1	-0.712651	4.86837	0.218752	0.639993	0.999854	6.34e-05	None
Birc6	0.709645	4.86236	0.218455	0.64022	0.999854	6.34e-05	None
Dstn	-0.385132	8.2671	0.218158	0.640447	0.999854	6.34e-05	None
Gnb1;Gnb2	-0.41224	9.33136	0.218154	0.64045	0.999854	6.34e-05	None
Shmt1;Shmt2	-0.610722	5.60226	0.218038	0.640539	0.999854	6.34e-05	None
Ddx20	-0.785565	5.61362	0.217993	0.640574	0.999854	6.34e-05	None
Elmo2	1.29546	3.74747	0.217968	0.640593	0.999854	6.34e-05	None
Thoc6	-1.17498	3.48813	0.217968	0.640593	0.999854	6.34e-05	None
Cnnm3	0.448899	6.71614	0.217733	0.640772	0.999854	6.34e-05	None
Inpp5b	-1.42621	1.1433	0.216694	0.64157	0.999854	6.34e-05	None
Pfn2	-1.38671	3.28604	0.21666	0.641597	0.999854	6.34e-05	None
Tmed2	0.491653	6.20472	0.216514	0.641709	0.999854	6.34e-05	None
Angpt2	-0.422843	6.96572	0.2163	0.641874	0.999854	6.34e-05	None
Pgk1;Pgk2	0.361707	9.50029	0.216009	0.642098	0.999854	6.34e-05	None
Cops7a	0.705099	4.93004	0.215933	0.642157	0.999854	6.34e-05	None
Rnf149	0.415631	7.99288	0.214614	0.643175	0.999854	6.34e-05	None
Chic2	0.458547	7.4195	0.214592	0.643192	0.999854	6.34e-05	None
Arl6ip5	-1.49222	3.66539	0.213712	0.643873	0.999854	6.34e-05	None
Fgg	0.324957	12.2663	0.213184	0.644283	0.999854	6.34e-05	None
Mapk3	0.452856	6.57161	0.213046	0.64439	0.999854	6.34e-05	None
Rpl30	-0.364503	8.49444	0.21277	0.644605	0.999854	6.34e-05	None
Rab23	0.471279	6.58119	0.211966	0.645231	0.999854	6.34e-05	None
Ptpn11	-0.528959	5.86044	0.211826	0.64534	0.999854	6.34e-05	None
Trip10	-1.12507	3.63791	0.211654	0.645474	0.999854	6.34e-05	None
Hyou1	0.496995	6.18784	0.21124	0.645797	0.999854	6.34e-05	None
Gnl3l	1.8272	1.24859	0.210793	0.646146	0.999854	6.34e-05	Up
Pnkd	-0.633218	5.26528	0.210759	0.646173	0.999854	6.34e-05	None
Ap2b1	-0.35952	8.52391	0.210644	0.646263	0.999854	6.34e-05	None
Ctps1	0.548152	5.6842	0.2104	0.646454	0.999854	6.34e-05	None
Ppfia1	1.12722	3.69867	0.210138	0.646659	0.999854	6.34e-05	None
Rab1b	-0.409655	8.0177	0.209951	0.646806	0.999854	6.34e-05	None
Gabarapl2	-0.450137	6.60409	0.209586	0.647092	0.999854	6.34e-05	None
Ddb1	0.403196	7.09656	0.208915	0.647619	0.999854	6.34e-05	None
Ddx39b	-0.79094	5.61068	0.208912	0.647622	0.999854	6.34e-05	None
Pkp4	-0.452127	6.59813	0.208638	0.647837	0.999854	6.34e-05	None
Slit2	-0.579053	5.55761	0.20836	0.648056	0.999854	6.34e-05	None
Cand1	0.404347	7.38252	0.207948	0.648381	0.999854	6.34e-05	None
Bax	-0.733355	5.99318	0.207792	0.648503	0.999854	6.34e-05	None
Marchf8	0.606713	5.37255	0.207729	0.648553	0.999854	6.34e-05	None
Psma1	0.414776	7.24481	0.207346	0.648855	0.999854	6.34e-05	None
Slc29a1	-0.672245	7.55039	0.206896	0.649211	0.999854	6.34e-05	None
Atp6v1c1	1.12123	3.59501	0.206493	0.64953	0.999854	6.34e-05	None
Usp7	-1.41509	2.38802	0.206147	0.649804	0.999854	6.34e-05	None
Lims1	0.374528	7.90241	0.205489	0.650327	0.999854	6.34e-05	None
Syncrip	-0.442009	7.11809	0.204456	0.651148	0.999854	6.34e-05	None
Hectd3	-0.841173	5.01232	0.204031	0.651486	0.999854	6.34e-05	None
Myo10	0.489748	6.14397	0.203764	0.6517	0.999854	6.34e-05	None
Kif5b	0.432633	6.83523	0.203609	0.651823	0.999854	6.34e-05	None
Krt14;Krt42	-0.982544	5.48538	0.203428	0.651968	0.999854	6.34e-05	None
Rmc1	1.39907	2.64084	0.203314	0.652059	0.999854	6.34e-05	None
Anxa11;Anxa7	0.681323	7.18148	0.202886	0.652402	0.999854	6.34e-05	None
Sulf2	-0.376989	7.95748	0.202821	0.652454	0.999854	6.34e-05	None
Fmr1	-0.771926	4.45031	0.202357	0.652825	0.999854	6.34e-05	None
Hnrnpr	-1.09774	3.72433	0.202242	0.652917	0.999854	6.34e-05	None
Spcs2	-1.31729	4.18673	0.20203	0.653087	0.999854	6.34e-05	None
Sars1	-0.687808	6.65349	0.201811	0.653263	0.999854	6.34e-05	None
Antxr1	-0.419709	6.99955	0.201731	0.653328	0.999854	6.34e-05	None
Lsm12	-0.519808	5.86085	0.201007	0.653909	0.999854	6.34e-05	None
Rab35	0.372066	7.85873	0.200795	0.65408	0.999854	6.34e-05	None
Gapdh	1.35024	3.21023	0.200068	0.654666	0.999854	6.34e-05	None
P4hb	0.369608	8.09454	0.20005	0.65468	0.999854	6.34e-05	None
Gspt2	0.816617	5.17872	0.199894	0.654806	0.999854	6.34e-05	None
Dlg1	0.463367	6.32299	0.199857	0.654836	0.999854	6.34e-05	None
Txn	0.36307	9.35382	0.199376	0.655225	0.999854	6.34e-05	None
Apom	-0.377654	9.61305	0.198877	0.655629	0.999854	6.34e-05	None
Pgam1	0.348891	9.41718	0.198327	0.656074	0.999854	6.34e-05	None
Sord	-0.484842	7.44288	0.197934	0.656394	0.999854	6.34e-05	None
C8a	1.08057	4.51861	0.19789	0.656429	0.999854	6.34e-05	None
Snx2	0.510164	5.9964	0.197662	0.656615	0.999854	6.34e-05	None
Grb2	-0.349599	8.60507	0.197519	0.656731	0.999854	6.34e-05	None
Ano6	0.472414	6.20241	0.197162	0.657022	0.999854	6.34e-05	None
Ncoa4	-0.432178	7.19617	0.196768	0.657342	0.999854	6.34e-05	None
Fahd2	-0.479137	6.32416	0.196601	0.657479	0.999854	6.34e-05	None
Arhgdib	-0.508796	5.93158	0.196445	0.657606	0.999854	6.34e-05	None
Unc13d	1.09348	3.60493	0.196289	0.657733	0.999854	6.34e-05	None
Epha7	0.420017	6.7884	0.195549	0.658338	0.999854	6.34e-05	None
Pea15	1.73271	0.875029	0.195519	0.658362	0.999854	6.34e-05	Up
Isyna1	-0.998481	4.05667	0.195476	0.658398	0.999854	6.34e-05	None
Rab14	-0.351804	9.3999	0.195217	0.65861	0.999854	6.34e-05	None
Skp1	1.20022	3.87417	0.195205	0.65862	0.999854	6.34e-05	None
Cpne1	-0.422437	6.63899	0.195201	0.658623	0.999854	6.34e-05	None
Anxa7	-0.352714	8.57684	0.194817	0.658938	0.999854	6.34e-05	None
Tmem268	-0.699806	6.18433	0.194452	0.659237	0.999854	6.34e-05	None
Plod2	-0.383179	7.11013	0.1944	0.659279	0.999854	6.34e-05	None
Sec24c	0.408175	6.80263	0.194301	0.659361	0.999854	6.34e-05	None
Pura	-0.816615	5.07187	0.194063	0.659557	0.999854	6.34e-05	None
Mcm5	-0.746214	5.57419	0.19349	0.660028	0.999854	6.34e-05	None
Galc	-1.53948	2.72567	0.193201	0.660266	0.999854	6.34e-05	Down
Hras;Kras;Nras	-0.356477	10.3396	0.193022	0.660413	0.999854	6.34e-05	None
Apeh	-0.408761	6.84471	0.19271	0.66067	0.999854	6.34e-05	None
Scpep1	0.366847	7.68489	0.192701	0.660678	0.999854	6.34e-05	None
Rap1b	-0.466088	8.85643	0.192523	0.660825	0.999854	6.34e-05	None
Psmb7	0.514249	5.9368	0.192003	0.661255	0.999854	6.34e-05	None
Psph	-1.54368	2.5398	0.192003	0.661255	0.999854	6.34e-05	Down
Stam;Stam2	0.486146	6.12675	0.191772	0.661446	0.999854	6.34e-05	None
Tulp3	-0.555704	5.54088	0.19121	0.661912	0.999854	6.34e-05	None
Rapsn	0.457517	6.30116	0.190812	0.662242	0.999854	6.34e-05	None
Copg1	0.597342	5.28422	0.190634	0.66239	0.999854	6.34e-05	None
Rad23b	0.505691	5.94871	0.190629	0.662394	0.999854	6.34e-05	None
Atp6v1b2	0.361974	7.71128	0.190109	0.662826	0.999854	6.34e-05	None
Pls3	-0.488565	6.047	0.19002	0.6629	0.999854	6.34e-05	None
Tfrc	0.350346	10.0733	0.189788	0.663093	0.999854	6.34e-05	None
Ccnb1	0.649464	4.95059	0.189576	0.66327	0.999854	6.34e-05	None
Prkg1	1.04513	4.5531	0.188739	0.663968	0.999854	6.34e-05	None
Psmd11	0.341705	8.75708	0.188584	0.664098	0.999854	6.34e-05	None
Pkd2	0.495612	6.03795	0.188411	0.664242	0.999854	6.34e-05	None
Nvl	-1.51432	2.7547	0.187893	0.664676	0.999854	6.34e-05	Down
Mpzl1	0.332793	9.73483	0.187614	0.66491	0.999854	6.34e-05	None
Hnrnpf	0.403332	6.92484	0.186768	0.66562	0.999854	6.34e-05	None
Sdf2	1.52312	2.39548	0.186509	0.665839	0.999854	6.34e-05	Up
Osgep	-1.47199	3.23025	0.186503	0.665843	0.999854	6.34e-05	None
Tln2	0.479296	6.03868	0.186483	0.66586	0.999854	6.34e-05	None
Vasp	0.456168	6.53022	0.186182	0.666114	0.999854	6.34e-05	None
Smarca5	-0.758969	5.36826	0.18613	0.666157	0.999854	6.34e-05	None
Iqgap1	0.382889	7.01504	0.185656	0.666557	0.999854	6.34e-05	None
Dtl	0.847036	4.89759	0.185581	0.66662	0.999854	6.34e-05	None
S100a16	1.7225	2.7756	0.185169	0.666968	0.999854	6.34e-05	Up
Atic	0.333391	8.54459	0.184869	0.667222	0.999854	6.34e-05	None
Lta4h	0.448385	6.33196	0.184628	0.667425	0.999854	6.34e-05	None
Lrba;Nbea	1.17995	3.81835	0.184327	0.667681	0.999854	6.34e-05	None
Rfc5	-1.01608	3.8225	0.184236	0.667758	0.999854	6.34e-05	None
Nmt1	0.643005	5.00256	0.183732	0.668185	0.999854	6.34e-05	None
F2	-0.379054	10.8703	0.183541	0.668348	0.999854	6.34e-05	None
Rab5a	-0.356127	7.45244	0.183539	0.668349	0.999854	6.34e-05	None
Ahcyl2	0.581846	5.30435	0.18339	0.668476	0.999854	6.34e-05	None
Nt5c	-1.46492	3.16364	0.183364	0.668498	0.999854	6.34e-05	None
Pcyt2	-0.54307	5.71853	0.183132	0.668696	0.999854	6.34e-05	None
Rab9a	0.3677	7.46143	0.182904	0.668889	0.999854	6.34e-05	None
Mbtps1	-0.90659	5.44228	0.182386	0.669331	0.999854	6.34e-05	None
Cacna2d1	0.453294	6.31699	0.182081	0.669591	0.999854	6.34e-05	None
Hsp90aa1;Hsp90ab1	0.322902	10.7437	0.181656	0.669954	0.999854	6.34e-05	None
Fam98a	0.801485	5.11377	0.181621	0.669984	0.999854	6.34e-05	None
Myh9	-0.351204	8.64183	0.181455	0.670126	0.999854	6.34e-05	None
Mapre2	-0.70587	5.84668	0.181439	0.67014	0.999854	6.34e-05	None
Pdcd5	-0.668458	6.16225	0.18114	0.670395	0.999854	6.34e-05	None
Ptprj	0.333813	8.48846	0.180953	0.670555	0.999854	6.34e-05	None
Zdhhc3	1.23459	3.49987	0.17948	0.67182	0.999854	6.34e-05	None
Tns2	-0.869865	4.46939	0.178469	0.672692	0.999854	6.34e-05	None
Slc25a4	0.519244	5.63665	0.178149	0.672969	0.999854	6.34e-05	None
Dcaf8	0.946967	4.17036	0.178145	0.672972	0.999854	6.34e-05	None
Cdc23	1.44418	3.11975	0.17777	0.673296	0.999854	6.34e-05	None
Atp6ap1	-0.90862	4.26331	0.177652	0.673399	0.999854	6.34e-05	None
Eloc	0.338304	8.23333	0.176305	0.674568	0.999854	6.34e-05	None
Llgl1	-0.854117	4.54812	0.176137	0.674715	0.999854	6.34e-05	None
Zranb2	1.06728	3.47208	0.176136	0.674715	0.999854	6.34e-05	None
Memo1	-0.614043	4.98616	0.175963	0.674866	0.999854	6.34e-05	None
Renbp	-1.47697	2.568	0.175898	0.674923	0.999854	6.34e-05	None
Ehd1	-0.317007	9.62379	0.175879	0.674939	0.999854	6.34e-05	None
Lrrk1	1.08148	3.36978	0.174811	0.675871	0.999854	6.34e-05	None
Arpc2	0.345371	7.66347	0.17433	0.676292	0.999854	6.34e-05	None
Gsr	-0.944207	4.0703	0.174121	0.676475	0.999854	6.34e-05	None
Ptma	0.984956	3.87899	0.174085	0.676506	0.999854	6.34e-05	None
Slc20a1	-0.652457	6.43144	0.174039	0.676547	0.999854	6.34e-05	None
Csad	-0.425497	6.47544	0.173141	0.677335	0.999854	6.34e-05	None
Pkm	0.307108	10.3197	0.17312	0.677353	0.999854	6.34e-05	None
Vim	-0.328317	9.62154	0.173014	0.677447	0.999854	6.34e-05	None
Marchf7	-0.550704	5.44957	0.172751	0.677678	0.999854	6.34e-05	None
Xirp2	-0.891146	5.42367	0.172739	0.677689	0.999854	6.34e-05	None
Fkbp4	0.328795	8.24082	0.171755	0.678557	0.999854	6.34e-05	None
Vps16	-0.61122	4.97654	0.171243	0.679009	0.999854	6.34e-05	None
Psma2	0.450223	6.19216	0.171065	0.679167	0.999854	6.34e-05	None
Fyn	-0.348717	8.51938	0.170712	0.67948	0.999854	6.34e-05	None
Tmem104	0.447135	6.49946	0.170428	0.679732	0.999854	6.34e-05	None
Atp6v0a2	-0.436191	6.25613	0.170395	0.679761	0.999854	6.34e-05	None
Pfdn1	-1.05509	4.18462	0.170367	0.679786	0.999854	6.34e-05	None
Olfm3	-0.757535	5.28927	0.169936	0.680169	0.999854	6.34e-05	None
Adam23	0.504653	5.67029	0.169381	0.680663	0.999854	6.34e-05	None
Rps6ka3	-0.455879	6.10214	0.169026	0.680979	0.999854	6.34e-05	None
Vps4a	-0.323771	8.86382	0.168898	0.681093	0.999854	6.34e-05	None
Rsu1	0.402632	6.65384	0.168633	0.681329	0.999854	6.34e-05	None
Rpl27	0.325995	8.65765	0.168614	0.681347	0.999854	6.34e-05	None
Sf3b3	-0.51656	5.55718	0.168553	0.681401	0.999854	6.34e-05	None
Arl6	1.01524	3.68011	0.168237	0.681683	0.999854	6.34e-05	None
Cdk1	0.348848	7.34777	0.167566	0.682284	0.999854	6.34e-05	None
Adgra3	-0.491147	5.81317	0.167464	0.682376	0.999854	6.34e-05	None
Manf	0.532991	5.46064	0.167241	0.682575	0.999854	6.34e-05	None
Ap2m1	-0.337206	8.32456	0.166932	0.682853	0.999854	6.34e-05	None
Akt1	0.585716	5.09931	0.166445	0.683291	0.999854	6.34e-05	None
Hspe1	0.750802	4.18077	0.166089	0.683612	0.999854	6.34e-05	None
Krt77	1.09564	3.07696	0.165305	0.684319	0.999854	6.34e-05	None
Usp47	-0.740239	5.13087	0.165178	0.684434	0.999854	6.34e-05	None
Gclm	-1.14895	3.63745	0.164816	0.684761	0.999854	6.34e-05	None
Gcn1	-0.450057	6.03771	0.164582	0.684973	0.999854	6.34e-05	None
Cntln	-1.55418	3.3536	0.16283	0.686564	0.999854	6.34e-05	Down
Atg3	0.707275	4.38642	0.162584	0.686788	0.999854	6.34e-05	None
Zwilch	-1.55036	0.636186	0.161886	0.687426	0.999854	6.34e-05	Down
Itch	0.333366	7.92195	0.161696	0.6876	0.999854	6.34e-05	None
Tmem109	-0.834523	4.45709	0.161528	0.687753	0.999854	6.34e-05	None
Tmem199	-0.881473	3.55418	0.161176	0.688076	0.999854	6.34e-05	None
Dtx2	-0.545908	5.27214	0.161121	0.688127	0.999854	6.34e-05	None
Try10	0.472301	6.6142	0.160875	0.688352	0.999854	6.34e-05	None
Heatr1	-1.00206	4.30155	0.160776	0.688443	0.999854	6.34e-05	None
Eif4g1	0.370805	6.78991	0.160655	0.688554	0.999854	6.34e-05	None
Gstm2	1.20576	3.18976	0.159792	0.689348	0.999854	6.34e-05	None
Scamp3	-0.596977	7.10643	0.159573	0.68955	0.999854	6.34e-05	None
Ccn1	-0.33122	8.71093	0.159485	0.689631	0.999854	6.34e-05	None
Dnajb1	-0.59893	6.74003	0.159417	0.689694	0.999854	6.34e-05	None
Calr	0.33303	7.56609	0.158946	0.690129	0.999854	6.34e-05	None
Usp5	-0.341387	7.30094	0.158566	0.69048	0.999854	6.34e-05	None
Tubb2a;Tubb2b	-0.627105	6.25973	0.158407	0.690627	0.999854	6.34e-05	None
Ap3m1	0.566109	5.12421	0.158198	0.690821	0.999854	6.34e-05	None
Abi1	0.649839	6.01911	0.15817	0.690847	0.999854	6.34e-05	None
Myh11	-1.07607	2.45889	0.157959	0.691043	0.999854	6.34e-05	None
Gmfb;Gmfg	0.420386	6.2627	0.157918	0.691081	0.999854	6.34e-05	None
Rps19	-0.316316	8.96568	0.157836	0.691157	0.999854	6.34e-05	None
Myl1;Myl3	0.881044	5.24996	0.157318	0.691638	0.999854	6.34e-05	None
Bop1	-1.17952	3.30704	0.157187	0.69176	0.999854	6.34e-05	None
Taldo1	0.385818	6.70779	0.156951	0.691979	0.999854	6.34e-05	None
Tbca	-0.689567	5.43132	0.156429	0.692466	0.999854	6.34e-05	None
Wdr36	-0.815869	4.49008	0.156365	0.692525	0.999854	6.34e-05	None
Bgn;Dcn	-1.16292	3.41879	0.156344	0.692545	0.999854	6.34e-05	None
Tulp4	-0.449655	6.00836	0.156308	0.692579	0.999854	6.34e-05	None
Cdk5	0.80641	3.76203	0.156218	0.692662	0.999854	6.34e-05	None
Lum	0.336994	10.24	0.156131	0.692744	0.999854	6.34e-05	None
Gnas	-0.942914	3.76873	0.156106	0.692767	0.999854	6.34e-05	None
Dhx9	-1.32246	3.3859	0.155571	0.693268	0.999854	6.34e-05	None
Epb41	0.33932	7.19706	0.155213	0.693603	0.999854	6.34e-05	None
Nsa2	-0.747194	4.97643	0.154767	0.694021	0.999854	6.34e-05	None
Pgk1	-0.306638	9.77759	0.154709	0.694075	0.999854	6.34e-05	None
Mt2	-0.339945	8.25887	0.154642	0.694138	0.999854	6.34e-05	None
Ube2z	0.574377	5.06032	0.154579	0.694197	0.999854	6.34e-05	None
Naprt	-0.644941	5.90928	0.15438	0.694385	0.999854	6.34e-05	None
Clcn5	-1.00791	3.36049	0.154322	0.694439	0.999854	6.34e-05	None
Aak1	1.00241	3.46021	0.154318	0.694442	0.999854	6.34e-05	None
Ctdsp1	-0.48291	5.63874	0.154188	0.694565	0.999854	6.34e-05	None
Camk2d	0.505394	5.44696	0.154106	0.694642	0.999854	6.34e-05	None
Camk1	-0.9059	4.01262	0.15401	0.694732	0.999854	6.34e-05	None
Ubl3	0.299558	9.66264	0.153787	0.694943	0.999854	6.34e-05	None
Edf1	-0.915015	4.00077	0.153518	0.695196	0.999854	6.34e-05	None
Cant1	-0.565823	5.09411	0.153425	0.695284	0.999854	6.34e-05	None
Chd4	-1.34538	3.04518	0.153354	0.69535	0.999854	6.34e-05	None
Crk	-0.642303	5.75276	0.152409	0.696244	0.999854	6.34e-05	None
Krt1	-0.381597	10.1254	0.151886	0.696739	0.999854	6.34e-05	None
Pttg1ip	-0.341326	9.1067	0.151699	0.696917	0.999854	6.34e-05	None
Lancl1	0.36681	6.7988	0.151585	0.697025	0.999854	6.34e-05	None
Rps6ka1;Rps6ka2;Rps6ka3	0.403089	6.42221	0.151068	0.697517	0.999854	6.34e-05	None
Prag1	-1.21457	4.66397	0.150878	0.697698	0.999854	6.34e-05	None
Ndrg1	0.441204	6.42231	0.150765	0.697805	0.999854	6.34e-05	None
Hectd4	-1.03316	2.80763	0.150667	0.697899	0.999854	6.34e-05	None
Uggt1	-0.90178	3.91005	0.150568	0.697993	0.999854	6.34e-05	None
Otulin	-1.34513	1.42887	0.150273	0.698275	0.999854	6.34e-05	None
Sf3a3	0.783286	4.57173	0.150141	0.6984	0.999854	6.34e-05	None
Txndc17	-0.37838	6.90853	0.150053	0.698485	0.999854	6.34e-05	None
Ache	-0.698993	5.26896	0.149825	0.698703	0.999854	6.34e-05	None
Tbl3	-1.11621	3.4893	0.149666	0.698855	0.999854	6.34e-05	None
Arhgef39	-0.404907	6.33682	0.14918	0.69932	0.999854	6.34e-05	None
Stau1	-0.559331	5.02847	0.149168	0.699332	0.999854	6.34e-05	None
Myo9b	-0.859161	4.16513	0.148942	0.699549	0.999854	6.34e-05	None
Eif2b4	-0.883307	4.01886	0.147587	0.700852	0.999854	6.34e-05	None
Eprs1	-0.312741	8.16554	0.146743	0.701667	0.999854	6.34e-05	None
Enpp2	0.623747	4.71662	0.146735	0.701675	0.999854	6.34e-05	None
Nrp1	-0.299718	8.53936	0.1463	0.702097	0.999854	6.34e-05	None
Pdpk1	-1.02897	2.7254	0.146242	0.702153	0.999854	6.34e-05	None
Hip1;Hip1r	-0.402336	6.28326	0.146228	0.702167	0.999854	6.34e-05	None
Rras;Rras2	0.315098	9.12998	0.145877	0.702507	0.999854	6.34e-05	None
Rpl34	-0.328409	8.40101	0.145078	0.703284	0.999854	6.34e-05	None
Arl1	1.05436	3.79872	0.144994	0.703366	0.999854	6.34e-05	None
Anxa5	0.291961	10.6255	0.144689	0.703664	0.999854	6.34e-05	None
Golt1b	-0.963632	3.45107	0.144683	0.70367	0.999854	6.34e-05	None
Zdhhc15	-0.531521	5.24511	0.144222	0.70412	0.999854	6.34e-05	None
Cstb	0.354394	6.9761	0.143574	0.704754	0.999854	6.34e-05	None
Krt73	-0.348472	10.8832	0.143541	0.704786	0.999854	6.34e-05	None
Ranbp1	-0.319455	7.37271	0.143314	0.705008	0.999854	6.34e-05	None
Chil3;Chil4	-1.07165	4.37002	0.143	0.705316	0.999854	6.34e-05	None
Clta	-0.44976	9.60649	0.14283	0.705484	0.999854	6.34e-05	None
Krt72	-1.16666	2.70105	0.142646	0.705665	0.999854	6.34e-05	None
Mmp14	-0.315093	9.10792	0.142498	0.70581	0.999854	6.34e-05	None
Tpm1;Tpm3	-0.576251	6.7107	0.142226	0.706078	0.999854	6.34e-05	None
Qdpr	0.349541	6.86461	0.141394	0.706899	0.999854	6.34e-05	None
Septin6	-0.932523	3.55494	0.141196	0.707095	0.999854	6.34e-05	None
Rac2	-0.574503	4.88752	0.140297	0.707985	0.999854	6.34e-05	None
Mdh2	0.43876	5.81748	0.140083	0.708198	0.999854	6.34e-05	None
Anxa8	-0.352189	6.80047	0.13974	0.70854	0.999854	6.34e-05	None
Pa2g4	0.433389	5.8669	0.139632	0.708647	0.999854	6.34e-05	None
Farsa	-0.649535	5.46202	0.13955	0.708729	0.999854	6.34e-05	None
Tuba1c;Tuba8	0.318724	8.42079	0.139443	0.708835	0.999854	6.34e-05	None
Plpbp	-0.945943	3.46079	0.139352	0.708926	0.999854	6.34e-05	None
Rad50	-1.06639	3.53816	0.139332	0.708946	0.999854	6.34e-05	None
Plxna2	0.373258	7.69423	0.139041	0.709236	0.999854	6.34e-05	None
Epn1;Epn3	-1.18214	2.57449	0.138994	0.709283	0.999854	6.34e-05	None
Vps28	-0.286887	9.75607	0.138928	0.709349	0.999854	6.34e-05	None
Tmem185a	-1.10898	3.36237	0.138711	0.709566	0.999854	6.34e-05	None
Nubp1	1.153	2.54715	0.138602	0.709674	0.999854	6.34e-05	None
Pcbp4	0.394234	6.38628	0.13856	0.709717	0.999854	6.34e-05	None
Itgb1	-0.276203	11.2499	0.138464	0.709813	0.999854	6.34e-05	None
Wdr3	-0.879652	3.81151	0.138267	0.71001	0.999854	6.34e-05	None
Celsr2	-0.863174	3.87162	0.138043	0.710234	0.999854	6.34e-05	None
Lrp12	0.330323	7.19327	0.137822	0.710456	0.999854	6.34e-05	None
Tmc8	-0.586628	6.14438	0.137525	0.710754	0.999854	6.34e-05	None
Crmp1;Dpysl2;Dpysl3	0.292803	8.30427	0.136807	0.711476	0.999854	6.34e-05	None
Clcn6	-1.29205	2.69931	0.136668	0.711616	0.999854	6.34e-05	None
Golm2	-0.70457	4.02084	0.136409	0.711878	0.999854	6.34e-05	None
Ctnnd1;Pkp4	-0.656149	5.30671	0.13574	0.712553	0.999854	6.34e-05	None
Bcap29	-1.1483	2.54472	0.13544	0.712857	0.999854	6.34e-05	None
Steap2	0.433353	5.84588	0.135203	0.713098	0.999854	6.34e-05	None
Eif3c	0.345019	6.82211	0.135153	0.713148	0.999854	6.34e-05	None
Myh10	-0.597362	5.99801	0.135003	0.7133	0.999854	6.34e-05	None
Glod4	0.380788	6.40171	0.134931	0.713373	0.999854	6.34e-05	None
Tbcel	-0.773283	4.35991	0.134806	0.7135	0.999854	6.34e-05	None
Plxna1	0.298432	9.19912	0.134499	0.713812	0.999854	6.34e-05	None
Nploc4	0.425041	5.84528	0.134307	0.714008	0.999854	6.34e-05	None
Oxct1	1.07523	3.42917	0.134094	0.714225	0.999854	6.34e-05	None
Aaas	0.48215	5.47972	0.133865	0.714458	0.999854	6.34e-05	None
Tpi1	0.272869	10.2235	0.133673	0.714654	0.999854	6.34e-05	None
Flot2	-0.288881	9.2356	0.133569	0.71476	0.999854	6.34e-05	None
Map4k4;Tnik	-1.22922	3.34146	0.133475	0.714856	0.999854	6.34e-05	None
Sort1	-0.306616	8.00834	0.133412	0.714921	0.999854	6.34e-05	None
Galk2	0.729182	4.7809	0.133409	0.714924	0.999854	6.34e-05	None
Ftcd	-0.868888	4.58695	0.133181	0.715157	0.999854	6.34e-05	None
Krt1;Krt73;Krt77	0.319048	11.4284	0.13277	0.715577	0.999854	6.34e-05	None
Rpl3	-0.286292	9.14476	0.132348	0.71601	0.999854	6.34e-05	None
Ap2a2	0.376788	6.43113	0.132333	0.716026	0.999854	6.34e-05	None
Xpnpep1	-0.340349	6.88422	0.132086	0.716279	0.999854	6.34e-05	None
Stip1	0.294068	8.07215	0.131084	0.71731	0.999854	6.34e-05	None
Rps27	-0.698128	4.85394	0.130876	0.717526	0.999854	6.34e-05	None
Llgl2	0.726796	4.58684	0.130874	0.717528	0.999854	6.34e-05	None
Ext2	-0.391018	6.33027	0.130759	0.717646	0.999854	6.34e-05	None
Atp2b3	-0.730642	4.598	0.130698	0.71771	0.999854	6.34e-05	None
Ubap2l	0.536573	4.96386	0.130695	0.717712	0.999854	6.34e-05	None
Hsp90aa1	0.274501	9.67577	0.130611	0.7178	0.999854	6.34e-05	None
Pdlim5	-0.590182	5.87377	0.130543	0.717869	0.999854	6.34e-05	None
Trappc6b	-0.975936	2.95189	0.130362	0.718057	0.999854	6.34e-05	None
Wasl	-0.623155	5.43446	0.130207	0.718218	0.999854	6.34e-05	None
Rock2	-0.813574	4.04109	0.130157	0.718269	0.999854	6.34e-05	None
Gk;Gk2	-0.988679	6.91257	0.130131	0.718296	0.999854	6.34e-05	None
Laptm4a	0.338579	10.9517	0.13006	0.71837	0.999854	6.34e-05	None
Fnbp1	0.747818	4.42983	0.129831	0.718608	0.999854	6.34e-05	None
Cct5	-0.288242	8.25483	0.129817	0.718621	0.999854	6.34e-05	None
Pfkl;Pfkm	0.347764	6.62611	0.129551	0.718898	0.999854	6.34e-05	None
Spcs3	-0.632995	5.31679	0.129447	0.719007	0.999854	6.34e-05	None
Nop16	-1.1142	2.40718	0.129366	0.719091	0.999854	6.34e-05	None
Galk1	0.267157	10.6672	0.128709	0.719775	0.999854	6.34e-05	None
Uck2	1.39215	3.20861	0.128279	0.720223	0.999854	6.34e-05	None
Zc3h10	-0.557061	6.32998	0.128263	0.72024	0.999854	6.34e-05	None
Erbb2	-0.51424	5.09188	0.127965	0.720551	0.999854	6.34e-05	None
Clint1	-1.10789	2.16889	0.127949	0.720568	0.999854	6.34e-05	None
Daglb	-0.738106	4.44268	0.127536	0.721001	0.999854	6.34e-05	None
Slc29a3	0.820885	4.00012	0.127502	0.721036	0.999854	6.34e-05	None
Csrp1	-0.290675	8.69347	0.127433	0.721108	0.999854	6.34e-05	None
Khdrbs1	-0.424734	5.77814	0.127429	0.721113	0.999854	6.34e-05	None
Rcc2	0.457674	5.55588	0.127304	0.721244	0.999854	6.34e-05	None
Usp15	-0.567887	4.71093	0.126399	0.722195	0.999854	6.34e-05	None
Rab33b	0.297781	7.82547	0.126113	0.722497	0.999854	6.34e-05	None
Fubp1;Khsrp	-0.868647	4.44749	0.126064	0.722549	0.999854	6.34e-05	None
Capn5	-0.281274	8.17101	0.12568	0.722954	0.999854	6.34e-05	None
Mlph	1.07638	2.97606	0.125498	0.723146	0.999854	6.34e-05	None
Uso1	-0.628485	5.27719	0.125452	0.723195	0.999854	6.34e-05	None
Eif3j1;Eif3j2	1.02184	3.49953	0.125439	0.723209	0.999854	6.34e-05	None
Cap1	0.309732	7.25389	0.125056	0.723615	0.999854	6.34e-05	None
Farp1	0.275382	8.86686	0.124991	0.723683	0.999854	6.34e-05	None
Chordc1	0.840033	3.78987	0.124968	0.723708	0.999854	6.34e-05	None
Ehd1;Ehd3;Ehd4	-0.276663	8.60873	0.124773	0.723914	0.999854	6.34e-05	None
Blvra	-0.46882	5.46931	0.124668	0.724026	0.999854	6.34e-05	None
Sf3b2	-1.20339	3.11248	0.12465	0.724045	0.999854	6.34e-05	None
Acp1	0.33075	6.8397	0.124476	0.72423	0.999854	6.34e-05	None
Eipr1	-1.41392	1.81124	0.124325	0.72439	0.999854	6.34e-05	None
Gsta3	-0.573491	5.8711	0.124217	0.724505	0.999854	6.34e-05	None
Rbm25	-0.794976	4.97487	0.124204	0.724519	0.999854	6.34e-05	None
H2-Q10;H2-Q8;H2-T23	-1.37075	0.902918	0.124143	0.724584	0.999854	6.34e-05	None
Gmpr;Gmpr2	0.620091	5.44046	0.123898	0.724844	0.999854	6.34e-05	None
Sptbn1	-0.802756	3.96849	0.123725	0.725029	0.999854	6.34e-05	None
Zdhhc8	0.957628	2.98676	0.12359	0.725173	0.999854	6.34e-05	None
Sgce	-0.352183	9.57327	0.123439	0.725334	0.999854	6.34e-05	None
Scrn1	0.660128	5.00278	0.123426	0.725348	0.999854	6.34e-05	None
Abhd17a	-0.522536	7.01547	0.123318	0.725464	0.999854	6.34e-05	None
Calhm5	0.738725	4.42493	0.123157	0.725636	0.999854	6.34e-05	None
Ola1	0.302341	7.20465	0.12301	0.725793	0.999854	6.34e-05	None
Cmbl	-1.09549	3.79265	0.122922	0.725886	0.999854	6.34e-05	None
Nck1	0.442214	5.54152	0.122897	0.725913	0.999854	6.34e-05	None
Hspa9	-0.653058	5.02846	0.122884	0.725928	0.999854	6.34e-05	None
Chmp2b	-0.275693	8.84867	0.122746	0.726075	0.999854	6.34e-05	None
P2rx7	0.38376	6.15294	0.122574	0.726259	0.999854	6.34e-05	None
Gemin5	-0.259265	10.3381	0.122328	0.726523	0.999854	6.34e-05	None
Eif3b	0.340781	6.65124	0.122266	0.726589	0.999854	6.34e-05	None
Krt1;Krt2;Krt5;Krt6a;Krt77	0.340161	6.61315	0.122263	0.726592	0.999854	6.34e-05	None
Tf	-0.284083	10.5258	0.122261	0.726595	0.999854	6.34e-05	None
Ogn	0.582792	5.73701	0.122076	0.726794	0.999854	6.34e-05	None
Xrn1	1.06051	2.89332	0.12193	0.726951	0.999854	6.34e-05	None
Gys1;Gys2	0.631718	5.21674	0.121886	0.726998	0.999854	6.34e-05	None
Pfn1	0.265312	10.2191	0.121861	0.727025	0.999854	6.34e-05	None
Pcdh17	-0.645002	5.05739	0.121656	0.727245	0.999854	6.34e-05	None
Dnm1l	-0.608457	5.38741	0.121436	0.727482	0.999854	6.34e-05	None
Ppp5c	-0.754383	4.22081	0.121422	0.727498	0.999854	6.34e-05	None
Capza2	0.283961	8.17194	0.120697	0.72828	0.999854	6.34e-05	None
Cilp	0.348703	6.82613	0.120533	0.728457	0.999854	6.34e-05	None
GaskbB	-0.609768	4.3259	0.120266	0.728746	0.999854	6.34e-05	None
Septin11;Septin8	0.38352	6.39646	0.120238	0.728777	0.999854	6.34e-05	None
Psma6	0.331213	6.92072	0.120124	0.7289	0.999854	6.34e-05	None
Ipo8	1.21073	1.66742	0.120036	0.728995	0.999854	6.34e-05	None
Pacsin2	0.25667	9.96056	0.119997	0.729038	0.999854	6.34e-05	None
Prkcq	-0.675181	4.77363	0.11984	0.729208	0.999854	6.34e-05	None
Fstl1	-0.519756	5.01387	0.119812	0.729238	0.999854	6.34e-05	None
Cpd	0.358885	6.88541	0.119462	0.729619	0.999854	6.34e-05	None
Hpd	-0.636306	5.08817	0.11943	0.729654	0.999854	6.34e-05	None
Ptpn12	-1.02086	3.35768	0.119416	0.729668	0.999854	6.34e-05	None
Lbr	-0.701561	4.52846	0.118877	0.730256	0.999854	6.34e-05	None
Tdp2	0.500223	5.06539	0.118095	0.73111	0.999854	6.34e-05	None
Lmbrd2	-0.357912	6.34654	0.117989	0.731226	0.999854	6.34e-05	None
Ddx5	0.349666	6.47323	0.117984	0.731232	0.999854	6.34e-05	None
Ipo5	0.389017	5.92251	0.117836	0.731394	0.999854	6.34e-05	None
Tmed4	-0.543057	6.0954	0.117766	0.73147	0.999854	6.34e-05	None
Psmd12	-0.366846	6.58	0.117447	0.731821	0.999854	6.34e-05	None
Endod1	0.999533	3.43387	0.117334	0.731944	0.999854	6.34e-05	None
Ctsz	0.267834	8.72997	0.117263	0.732022	0.999854	6.34e-05	None
Tra2b	0.354284	6.34175	0.117161	0.732134	0.999854	6.34e-05	None
Ppp2ca;Ppp2cb	-0.318977	7.53457	0.117121	0.732178	0.999854	6.34e-05	None
Aph1a	0.763149	5.03139	0.116927	0.732392	0.999854	6.34e-05	None
Ubtd1	-0.301089	8.29849	0.116893	0.732429	0.999854	6.34e-05	None
Chp1	-0.678561	3.88533	0.11684	0.732487	0.999854	6.34e-05	None
Plxnd1	0.273736	8.85415	0.11679	0.732542	0.999854	6.34e-05	None
Garre1	0.640647	4.1051	0.116761	0.732575	0.999854	6.34e-05	None
Camk2g	0.930875	3.80107	0.116461	0.732905	0.999854	6.34e-05	None
Yipf4	-0.666156	4.78236	0.116359	0.733018	0.999854	6.34e-05	None
[truncated: 1,604 more rows]

## Sheet: down
gene_name	logFC	logCPM	LR	PValue	FDR	log10FDR	DEG
Gna12;Gna13	-21.453	11.3163	133.519	6.96e-31	1.64e-27	26.7861	Down
Pard3	-19.4868	9.35019	119.658	7.52e-28	9.03e-25	24.0444	Down
Epha3;Epha7;Ephb4	-17.9422	7.80573	95.4485	1.52e-22	1.15e-19	18.9396	Down
Rasal3	-17.6747	7.53825	95.3506	1.59e-22	1.15e-19	18.9396	Down
Srsf5;Srsf6	-17.4315	7.29514	83.3994	6.7e-20	4.03e-17	16.3951	Down
Rab13;Rab3a;Rab3d;Rab8a;Rab8b	-17.2626	7.12625	82.6705	9.69e-20	4.99e-17	16.3019	Down
Myh14	-17.7907	7.65421	79.8769	3.98e-19	1.79e-16	15.746	Down
Gnb2;Gnb4	-18.0427	7.9062	72.8762	1.38e-17	5.53e-15	14.2576	Down
Pbld1	-16.7174	6.58115	65.4355	6e-16	2.16e-13	12.6648	Down
Lcat	-16.8756	6.7393	64.9458	7.7e-16	2.52e-13	12.5983	Down
Spp2	-17.5413	7.40491	62.984	2.08e-15	6.26e-13	12.2036	Down
Gm884	-16.6159	6.4797	56.1341	6.77e-14	1.88e-11	10.7267	Down
Prg4	-16.3332	6.19709	51.1651	8.49e-13	2.19e-10	9.66049	Down
Pianp	-16.4529	6.31671	50.9798	9.33e-13	2.24e-10	9.64944	Down
Igsf8	-16.9019	6.76563	50.4614	1.22e-12	2.74e-10	9.56277	Down
Lasp1	-15.9682	5.83222	46.2614	1.03e-11	2.19e-09	8.65891	Down
Susd6	-16.1828	6.04676	45.5369	1.5e-11	3e-09	8.52313	Down
Ptprk;Ptprm	-15.7413	5.60545	40.654	1.82e-10	3.27e-08	7.48497	Down
Ptpra	-15.678	5.54222	38.8758	4.52e-10	7.75e-08	7.11075	Down
Frk;Met;Src	-15.6382	5.50247	37.5652	8.84e-10	1.45e-07	6.83926	Down
Tubb2a;Tubb4a;Tubb4b;Tubb5	-15.7903	5.65442	36.7592	1.34e-09	2.09e-07	6.67907	Down
Cemip;Cemip2	-15.4772	5.34154	34.119	5.18e-09	7.78e-07	6.10887	Down
Cdip1	-15.4405	5.30483	32.916	9.62e-09	1.39e-06	5.85796	Down
Igfals	-15.6199	5.48416	32.0421	1.51e-08	2.09e-06	5.6797	Down
Tm2d2	-15.374	5.23839	31.7303	1.77e-08	2.36e-06	5.6264	Down
Tubb1;Tubb2a;Tubb3;Tubb4a;Tubb4b;Tubb5;Tubb6	-17.1109	6.97455	30.8726	2.76e-08	3.31e-06	5.48012	Down
Impdh1;Impdh2	-15.3476	5.21202	30.8107	2.84e-08	3.31e-06	5.48012	Down
Myh10;Myh11	-15.261	5.1255	30.6531	3.09e-08	3.47e-06	5.45919	Down
Abcb1b;Abcb6	-15.4793	5.34359	30.231	3.84e-08	4.19e-06	5.37806	Down
Fgfr1;Fyn;Hck;Lyn;Yes1	-16.9373	6.80102	29.7707	4.86e-08	5.15e-06	5.28793	Down
Lox	-15.3403	5.20469	28.8519	7.81e-08	8.04e-06	5.09459	Down
Fbn1;Fbn2	-15.2304	5.09487	28.511	9.32e-08	9.32e-06	5.03036	Down
Pik3c2g	-17.1414	7.00503	28.434	9.69e-08	9.44e-06	5.025	Down
Tmem176b	-5.0957	9.81966	27.952	1.24e-07	1.18e-05	4.92844	Down
Cul4a;Cul4b	-15.0583	4.92294	27.4042	1.65e-07	1.53e-05	4.81672	Down
Scamp4	-15.2548	5.11934	26.9183	2.12e-07	1.91e-05	4.71856	Down
Kit;Mapk1;Mapk3;Pdgfrb	-16.3905	6.25435	26.7542	2.31e-07	2.03e-05	4.69242	Down
Ifitm2;Ifitm3	-5.11344	8.42109	26.5515	2.57e-07	2.2e-05	4.65731	Down
Rab10;Rab14;Rab39b;Rab3a;Rab8a;Rab8b	-16.6509	6.51464	26.2356	3.02e-07	2.53e-05	4.59651	Down
Actb;Actbl2	-5.46112	12.9868	26.098	3.25e-07	2.66e-05	4.57555	Down
Yap1	-16.2365	6.10048	25.8992	3.6e-07	2.88e-05	4.54058	Down
Tmem198b	-14.9849	4.84964	25.7458	3.89e-07	3e-05	4.5224	Down
Tmed4;Tmed9	-15.0077	4.8724	25.7344	3.92e-07	3e-05	4.5224	Down
Acvr1b;Tgfbr1	-14.9301	4.79493	24.9438	5.9e-07	4.43e-05	4.35354	Down
Nmral1	-14.9019	4.76672	24.8635	6.15e-07	4.52e-05	4.34441	Down
Fmod	-14.9041	4.76888	24.7372	6.57e-07	4.73e-05	4.32471	Down
Igf1r;Insr	-14.8621	4.72698	24.5545	7.22e-07	5.1e-05	4.29214	Down
Dpt	-14.9031	4.76787	24.4672	7.56e-07	5.24e-05	4.28091	Down
Lect2	-14.916	4.78077	24.0587	9.34e-07	6.24e-05	4.20489	Down
Dcxr	-15.0571	4.92178	24.0574	9.35e-07	6.24e-05	4.20489	Down
Gbe1	-14.8171	4.68202	23.6964	1.13e-06	7.39e-05	4.13143	Down
Cfap20	-14.7867	4.65168	23.4847	1.26e-06	8.08e-05	4.09257	Down
Ptpmt1	-14.8239	4.68882	23.4555	1.28e-06	8.08e-05	4.09257	Down
Mob4	-14.7982	4.66309	23.4062	1.31e-06	8.15e-05	4.08897	Down
Mlana	-8.39919	10.7873	23.1472	1.5e-06	9.16e-05	4.03792	Down
Chmp1b2	-16.061	5.92501	23.0826	1.55e-06	9.32e-05	4.03062	Down
Ldlrad3	-15.7272	5.59135	22.0729	2.62e-06	0.000155039	3.80956	Down
Ptk7	-14.6517	4.5168	21.8754	2.91e-06	0.000169073	3.77193	Down
Ephx2	-15.7277	5.59186	21.437	3.66e-06	0.00020911	3.67963	Down
Phf5a	-14.5255	4.39078	20.4132	6.24e-06	0.000351277	3.45435	Down
Eml6	-15.4619	5.32622	20.3257	6.53e-06	0.000362062	3.44122	Down
Ubac2	-5.60223	10.7915	20.2856	6.67e-06	0.000364132	3.43874	Down
Pxdn	-14.5335	4.39874	20.1679	7.09e-06	0.000381455	3.41856	Down
Ywhag;Ywhah	-15.4971	5.36139	19.9149	8.1e-06	0.000429013	3.36753	Down
Hbb-b2;Hbb-y	-4.71348	12.825	19.8016	8.59e-06	0.000448595	3.34815	Down
Relt	-14.4997	4.36495	19.6979	9.07e-06	0.000466857	3.33082	Down
Urod	-14.4856	4.35094	19.4838	1.01e-05	0.000510895	3.29167	Down
Pklr	-14.5371	4.4023	19.4718	1.02e-05	0.000510895	3.29167	Down
Ppp1r18	-14.4661	4.33145	19.4252	1.05e-05	0.000516348	3.28706	Down
Praf2	-14.4806	4.34589	19.2169	1.17e-05	0.000568091	3.24558	Down
Retreg3	-14.3808	4.24625	18.4094	1.78e-05	0.00085036	3.0704	Down
Ubqln2	-14.3609	4.22643	18.3967	1.79e-05	0.00085036	3.0704	Down
Pmel	-15.2288	5.09329	18.3022	1.88e-05	0.000881992	3.05454	Down
Vnn1	-4.40092	8.63993	17.9814	2.23e-05	0.00103042	2.98698	Down
Snrpd2	-14.2855	4.15108	17.3909	3.04e-05	0.00138689	2.85796	Down
Casp3	-14.2777	4.14327	17.3682	3.08e-05	0.00138689	2.85796	Down
Pcdhgb7	-14.2835	4.14911	17.2626	3.26e-05	0.00144803	2.83922	Down
Chmp1b1	-15.1188	4.9834	16.8451	4.06e-05	0.00176227	2.75393	Down
Pfkl;Pfkp	-15.0206	4.88527	16.8433	4.06e-05	0.00176227	2.75393	Down
Ptgr2	-14.2214	4.08706	16.7771	4.2e-05	0.00178606	2.7481	Down
Trmt112	-14.2299	4.09554	16.7727	4.21e-05	0.00178606	2.7481	Down
Slc7a5;Slc7a6	-14.9953	4.86004	16.6972	4.38e-05	0.00183697	2.7359	Down
Cobll1	-14.1722	4.03796	16.3929	5.15e-05	0.00213183	2.67125	Down
Mpp2;Mpp6	-14.9021	4.76694	16.0588	6.14e-05	0.00251418	2.5996	Down
Sema3c	-14.157	4.02277	15.9976	6.34e-05	0.00256759	2.59047	Down
Mgat2	-14.158	4.02381	15.9277	6.58e-05	0.00263451	2.5793	Down
Cnbp	-14.1	3.96589	15.6881	7.47e-05	0.00295728	2.52911	Down
Clcn7	-14.0672	3.93313	15.598	7.83e-05	0.00306791	2.51316	Down
Gnpda1;Gnpda2	-14.0566	3.92261	15.5192	8.17e-05	0.00316412	2.49975	Down
C1qc	-8.46268	8.25983	15.4755	8.36e-05	0.00320366	2.49435	Down
Pfdn2	-14.0527	3.91871	15.3951	8.72e-05	0.00330778	2.48046	Down
Col18a1	-14.0819	3.94788	15.2962	9.19e-05	0.00344917	2.46229	Down
Mat1a;Mat2a	-14.8034	4.66835	15.1311	0.0001003	0.00372557	2.42881	Down
Kif2a;Kif2c	-14.7383	4.60329	15.0632	0.000103968	0.00382242	2.41766	Down
Glul	-13.9777	3.84388	14.8416	0.000116926	0.00425539	2.37106	Down
Acan	-14.0728	3.93875	14.8013	0.000119452	0.00430298	2.36623	Down
Src;Yes1	-14.6944	4.55949	14.7829	0.000120622	0.00430298	2.36623	Down
Snx12	-14.6898	4.55487	14.7419	0.000123278	0.0043546	2.36105	Down
Marchf3	-14.6437	4.50875	14.499	0.000140231	0.00489111	2.31059	Down
Khsrp	-13.939	3.80522	14.4863	0.000141181	0.00489111	2.31059	Down
Faah	-14.6257	4.49083	14.275	0.00015795	0.00541993	2.26601	Down
Emc2	-13.8973	3.76361	14.142	0.000169513	0.00576183	2.23944	Down
Nedd4;Nedd4l	-14.5669	4.43207	14.0153	0.000181329	0.00610586	2.21425	Down
Pygb;Pygl	-14.6482	4.5133	13.8909	0.000193733	0.00646315	2.18956	Down
Gamt	-14.5277	4.39292	13.7957	0.000203806	0.00673683	2.17154	Down
Tmc5	-6.57909	12.4097	13.7534	0.000208439	0.00682734	2.16575	Down
Bola2	-13.8404	3.70681	13.6941	0.000215127	0.00697506	2.15645	Down
B4galt1	-13.835	3.70147	13.6794	0.000216821	0.00697506	2.15645	Down
Pbdc1	-13.8225	3.68892	13.6017	0.000225978	0.00715158	2.1456	Down
Lss	-13.823	3.68948	13.5992	0.000226278	0.00715158	2.1456	Down
Ecm1	-7.69223	7.8554	13.5053	0.000237886	0.00745306	2.12767	Down
Coro2b	-13.8186	3.68505	13.4841	0.000240589	0.00747279	2.12652	Down
Tubb4a;Tubb4b;Tubb5	-8.11833	8.53071	13.425	0.00024829	0.00764605	2.11656	Down
Tubg1	-14.4761	4.34146	13.3562	0.000257575	0.00784755	2.10527	Down
Pcmt1	-13.7842	3.65068	13.3444	0.000259189	0.00784755	2.10527	Down
Cpne2;Cpne3;Cpne4	-13.8088	3.67526	13.3216	0.000262368	0.0078776	2.10361	Down
Krt14;Krt17;Krt42	-4.92676	8.90317	13.1271	0.000291057	0.00866677	2.06214	Down
Eef2k	-13.7474	3.61399	13.0956	0.000295995	0.00874155	2.05841	Down
Cdipt	-13.728	3.59464	12.9427	0.000321174	0.00940804	2.0265	Down
Pltp	-13.7357	3.60236	12.9079	0.000327206	0.00950743	2.02194	Down
Nolc1	-13.7035	3.57023	12.7791	0.000350517	0.0101033	1.99554	Down
Cope	-14.3564	4.22188	12.7243	0.000360936	0.0103171	1.98644	Down
Pdia6	-13.6818	3.54861	12.7102	0.000363662	0.0103171	1.98644	Down
Smad3	-13.646	3.51289	12.5483	0.000396564	0.0111627	1.95223	Down
Bin3	-13.6221	3.48899	12.4176	0.000425308	0.011879	1.92522	Down
Myadm	-7.17824	7.44446	12.0398	0.000520755	0.0143462	1.84326	Down
Dad1	-13.5744	3.44144	12.0368	0.000521609	0.0143462	1.84326	Down
Aph1c	-13.5799	3.44694	11.9635	0.000542518	0.0148083	1.8295	Down
Gprc5b	-13.5726	3.43967	11.8544	0.000575253	0.0154712	1.81048	Down
Slc22a21;Slc22a5	-13.6393	3.50614	11.8539	0.000575394	0.0154712	1.81048	Down
Tesl1	-13.5228	3.38996	11.736	0.00061302	0.0163608	1.7862	Down
Mmp2	-14.1653	4.03105	11.5714	0.00066974	0.0177432	1.75097	Down
Egfl7	-13.4887	3.35599	11.5437	0.000679777	0.0178777	1.74769	Down
Pglyrp2	-13.5177	3.38491	11.4942	0.00069812	0.018227	1.73928	Down
Gnb1;Gnb2;Gnb3	-7.28261	7.21081	11.4604	0.000710934	0.0183223	1.73702	Down
Prcp	-13.4951	3.36236	11.4578	0.000711941	0.0183223	1.73702	Down
Ube2d1;Ube2d3	-7.75528	6.81758	11.4178	0.000727448	0.0185886	1.73075	Down
Ppp4c	-13.4633	3.33066	11.3966	0.000735805	0.0186698	1.72886	Down
Tmem33	-13.4785	3.34575	11.324	0.00076512	0.0192426	1.71574	Down
Srprb	-13.4108	3.27824	11.3144	0.000769064	0.0192426	1.71574	Down
Psrc1	-13.3311	3.19877	11.0523	0.000885756	0.0218753	1.66005	Down
Bcat1	-13.3802	3.24778	11.0419	0.000890755	0.0218753	1.66005	Down
Dnmt1	-13.3707	3.23828	11.0383	0.000892499	0.0218753	1.66005	Down
Scrn2	-14.036	3.90203	10.9717	0.000925135	0.022522	1.64739	Down
Rabep1	-13.3212	3.18891	10.9509	0.000935603	0.022542	1.64701	Down
Eif4g3	-13.3468	3.21444	10.9432	0.000939492	0.022542	1.64701	Down
Slc9a3r2	-13.2948	3.16258	10.9329	0.000944724	0.022542	1.64701	Down
Plekha1	-13.3906	3.25813	10.8821	0.000970993	0.0230164	1.63796	Down
Qsox1	-14.0114	3.87751	10.8195	0.00100436	0.0236517	1.62614	Down
Mfsd14b	-13.3287	3.1964	10.7159	0.00106221	0.0248348	1.60494	Down
Cdk1;Cdk15;Cdk17;Cdk2;Cdk4;Cdk5	-5.6727	6.21303	10.6932	0.00107528	0.0248348	1.60494	Down
Osbpl9	-13.1136	2.98195	10.5214	0.00117999	0.0270795	1.56736	Down
Adipoq	-4.16135	7.06265	10.4455	0.0012295	0.0280374	1.55226	Down
Tubb1;Tubb2a;Tubb2b;Tubb3;Tubb4a;Tubb4b;Tubb5;Tubb6	-3.70759	7.51185	10.4064	0.0012558	0.028457	1.54581	Down
Tmtc3	-13.9289	3.79512	10.3407	0.00130126	0.0292274	1.53421	Down
Cyth1;Cyth2;Cyth3	-13.0655	2.93409	10.334	0.00130603	0.0292274	1.53421	Down
Apoe	-2.75432	12.8435	10.284	0.00134191	0.029845	1.52513	Down
Sec62	-12.9424	2.81139	10.1232	0.00146417	0.0323053	1.49073	Down
Triobp	-12.9451	2.81412	10.1121	0.00147303	0.0323053	1.49073	Down
Ppp2cb	-13.0467	2.91535	10.1041	0.00147942	0.0323053	1.49073	Down
Mdk	-12.9681	2.83698	10.0786	0.00150004	0.0325581	1.48734	Down
H2ac11;H2ac12;H2ac13;H2ac15;H2ac20;H2ac4;H2ac6;H2ac7;H2ac8;H2aj;H2aw;H2az1;H2az2;Hist1h2af;Hist1h2an;Hist1h2ao;Hist1h2ap;Hist2h2aa1	-5.27809	9.01706	10.0581	0.00151679	0.0327245	1.48513	Down
Snap47	-12.9194	2.78853	10.0134	0.00155406	0.033329	1.47718	Down
Chsy1	-13.822	3.68848	9.8833	0.00166785	0.0355579	1.44906	Down
Mxra8	-12.8547	2.72414	9.86054	0.00168861	0.0357886	1.44625	Down
Pum2	-12.8296	2.69911	9.82031	0.00172595	0.0363661	1.4393	Down
Mmp12	-13.7976	3.66408	9.76729	0.00177644	0.0370692	1.43099	Down
Wnt5a;Wnt5b	-12.7945	2.66419	9.76372	0.0017799	0.0370692	1.43099	Down
Eef2;Eftud2	-6.83677	8.50424	9.65864	0.00188464	0.039025	1.40866	Down
Epha4	-13.7994	3.66586	9.64214	0.00190163	0.0391519	1.40725	Down
Pde12	-12.7786	2.64824	9.59545	0.00195061	0.039932	1.39868	Down
Lrrc58	-12.8049	2.67446	9.50895	0.00204472	0.0412947	1.38411	Down
St8sia4	-12.6838	2.55403	9.50856	0.00204516	0.0412947	1.38411	Down
Abhd14b	-13.7325	3.59911	9.50283	0.00205155	0.0412947	1.38411	Down
Zc3hav1	-13.7216	3.58823	9.4545	0.00210631	0.0421261	1.37545	Down
Nup35	-12.587	2.45763	9.44102	0.00212185	0.0421261	1.37545	Down
H2ac11;H2ac12;H2ac13;H2ac15;H2ac4;H2ac6;H2ac7;H2ac8;H2aj;H2aw;Hist1h2af;Hist1h2an;Hist1h2ao;Hist1h2ap	-6.9879	6.15135	9.43577	0.00212794	0.0421261	1.37545	Down
Polr2e	-12.661	2.53118	9.40874	0.00215953	0.042518	1.37143	Down
Pip4k2c	-12.526	2.39693	9.38319	0.00218984	0.0428247	1.36831	Down
Gchfr	-12.5763	2.44697	9.37564	0.00219888	0.0428247	1.36831	Down
Fxr2	-13.6906	3.55731	9.35115	0.00222846	0.0431674	1.36484	Down
Cnot1	-12.5417	2.41262	9.2194	0.00239463	0.0457971	1.33916	Down
Ddr1;Ddr2	-6.41595	7.78556	9.20436	0.0024144	0.0457971	1.33916	Down
Bclaf1	-12.3982	2.26991	9.20386	0.00241506	0.0457971	1.33916	Down
Mdfi	-13.6455	3.51231	9.1886	0.00243527	0.0459386	1.33782	Down
Pigk	-12.285	2.1573	9.16941	0.00246094	0.0461811	1.33554	Down
Gtpbp1	-12.2767	2.14906	9.13688	0.00250507	0.0467657	1.33007	Down
Tbc1d10a	-12.2274	2.10009	9.0022	0.00269655	0.0500807	1.30033	Down
Cyfip2	-12.1585	2.03169	8.9659	0.00275064	0.0507976	1.29416	Down
Kif1c	-12.0966	1.97023	8.9496	0.00277531	0.0507976	1.29416	Down
Fbp2	-6.47903	6.29497	8.9376	0.00279359	0.0507976	1.29416	Down
Cog1	-12.073	1.94675	8.93304	0.00280057	0.0507976	1.29416	Down
Ehd1;Ehd2	-4.68304	7.87763	8.92844	0.00280764	0.0507976	1.29416	Down
Gstt3	-12.1229	1.99635	8.90959	0.00283678	0.0507976	1.29416	Down
Jagn1	-11.9651	1.83956	8.90472	0.00284435	0.0507976	1.29416	Down
Etfb	-12.2277	2.10045	8.90242	0.00284793	0.0507976	1.29416	Down
Srek1	-11.6044	1.48201	8.73295	0.0031251	0.055055	1.2592	Down
Jam2	-11.9032	1.77821	8.73011	0.00312997	0.055055	1.2592	Down
Abhd12	-11.8998	1.77487	8.72866	0.00313247	0.055055	1.2592	Down
Cog3	-11.5398	1.41817	8.70381	0.00317546	0.055518	1.25557	Down
Pip4k2b	-11.7267	1.60323	8.69569	0.00318963	0.055518	1.25557	Down
Alyref;Alyref2	-13.5362	3.40331	8.67846	0.00321993	0.0557759	1.25355	Down
Rrp12	-11.9262	1.80113	8.62098	0.00332314	0.0572883	1.24193	Down
Esyt1	-11.3101	1.19107	8.58965	0.0033808	0.0580048	1.23654	Down
Hic2	-3.41968	11.1067	8.54714	0.00346065	0.0590935	1.22846	Down
Cops8	-13.484	3.35125	8.52045	0.00351177	0.0596835	1.22415	Down
Pitpna;Pitpnb	-13.3962	3.26371	8.31755	0.00392638	0.0664166	1.17772	Down
Grhpr	-13.3728	3.24042	8.21741	0.00414904	0.0695346	1.1578	Down
Ubxn1	-13.3408	3.20845	8.21729	0.0041493	0.0695346	1.1578	Down
Rpl22l1	-13.3427	3.21038	8.19731	0.00419526	0.0698383	1.15591	Down
Pdxk	-13.3503	3.21796	8.19259	0.00420619	0.0698383	1.15591	Down
Rab34	-13.3046	3.17236	8.16736	0.00426508	0.0704913	1.15186	Down
Atg9a	-13.2757	3.14351	8.10636	0.00441101	0.0725702	1.13924	Down
Tpm3	-13.2577	3.12564	8.09502	0.00443872	0.0726582	1.13872	Down
Mylk	-13.2681	3.13592	8.07953	0.0044768	0.0726582	1.13872	Down
Evc2	-13.2528	3.12073	8.06072	0.00452352	0.0726582	1.13872	Down
Notch1;Notch2	-13.2629	3.13087	8.05734	0.00453196	0.0726582	1.13872	Down
Acbd3	-13.423	3.29048	8.05555	0.00453644	0.0726582	1.13872	Down
Peg10	-13.352	3.21955	8.05519	0.00453736	0.0726582	1.13872	Down
Fzd2;Fzd7	-6.06389	8.60948	8.02165	0.00462216	0.0736702	1.13271	Down
Pik3r1;Plcg2	-13.2414	3.10941	8.0141	0.00464145	0.0736702	1.13271	Down
Thbs3;Thbs4	-6.4751	5.92649	7.99142	0.00469997	0.0742718	1.12918	Down
Ptprd;Ptprf;Ptprs	-5.99258	8.73157	7.96565	0.00476735	0.0748679	1.1257	Down
Actl6a	-13.1821	3.05028	7.96114	0.00477924	0.0748679	1.1257	Down
Zc3hav1l	-13.1608	3.02909	7.90489	0.00493013	0.0768972	1.11409	Down
Lsm5	-13.1608	3.02901	7.89208	0.00496518	0.07711	1.11289	Down
Mat2b	-13.1457	3.01403	7.85487	0.00506839	0.0783751	1.10582	Down
Ifrd2	-13.1068	2.97526	7.83115	0.00513534	0.079071	1.10198	Down
Mob2	-13.0999	2.96842	7.76566	0.00532488	0.0814462	1.08913	Down
Ttyh2	-2.17702	11.1017	7.7623	0.00533481	0.0814462	1.08913	Down
Neto2	-13.0673	2.93596	7.73488	0.00541641	0.0823432	1.08437	Down
Fbxl17	-12.9803	2.84915	7.62426	0.00575882	0.0871808	1.05958	Down
Lclat1	-12.9423	2.81133	7.60832	0.00580997	0.0875872	1.05756	Down
Csnk1g2	-12.9734	2.84228	7.56491	0.00595156	0.0893479	1.04892	Down
Lfng	-12.9076	2.77681	7.53977	0.00603518	0.0902272	1.04466	Down
Snrpb2	-12.9136	2.78282	7.5116	0.00613028	0.0911633	1.04018	Down
Deptor	-12.901	2.7702	7.50629	0.0061484	0.0911633	1.04018	Down
Tyrp1	-2.1377	13.7374	7.4068	0.00649779	0.0954066	1.02042	Down
Fam171a2	-12.8429	2.71233	7.40231	0.00651402	0.0954066	1.02042	Down
Tab1	-12.8527	2.72202	7.38159	0.00658947	0.0961209	1.01718	Down
Slc25a3	-12.8525	2.72181	7.3707	0.0066295	0.0963149	1.01631	Down
Rela	-12.7918	2.66147	7.3384	0.00674969	0.0976672	1.01025	Down
Wdr26	-12.928	2.79719	7.32283	0.0068084	0.0981227	1.00823	Down
Nop2	-12.6924	2.56258	7.23497	0.0071497	0.10258	0.988936	Down
Eif4b	-12.6872	2.55733	7.22872	0.00717464	0.10258	0.988936	Down
Ddx49	-12.7156	2.58565	7.21411	0.00723326	0.10301	0.987122	Down
Sdcbp2	-12.6527	2.52295	7.19397	0.00731491	0.103762	0.983961	Down
Git1	-12.5993	2.46987	7.15828	0.00746187	0.105281	0.977648	Down
Anapc1	-12.6104	2.48095	7.15382	0.00748044	0.105281	0.977648	Down
Otud6b	-12.6296	2.50001	7.14242	0.00752816	0.105541	0.97658	Down
Usp10	-12.5855	2.45608	7.12446	0.00760394	0.10619	0.973917	Down
Lyz1	-12.5673	2.43796	7.11519	0.00764336	0.106328	0.973351	Down
Gde1	-12.5485	2.41934	7.09914	0.0077121	0.106872	0.971137	Down
Nmt2	-12.5321	2.4031	7.06051	0.00788014	0.108782	0.963442	Down
Nagk	-12.4829	2.35417	7.0371	0.00798384	0.109793	0.959425	Down
Rpf2	-12.3994	2.27101	7.01616	0.00807772	0.110236	0.957676	Down
Ltbr	-12.4001	2.27171	7.01056	0.00810302	0.110236	0.957676	Down
Mta1;Mta2;Mta3	-12.3752	2.247	7.0095	0.00810785	0.110236	0.957676	Down
Gpsm1	-12.3692	2.24105	6.99797	0.00816022	0.110531	0.956515	Down
[truncated: 348 more rows]

## Sheet: up
gene_name	logFC	logCPM	LR	PValue	FDR	log10FDR	DEG
[truncated: 86 more rows]

[truncated: 1 more sheets: passway]
