# Supplementary material for: Cancer cells impede T cell early activation and drive immune evasion by transferring Tmem176b
Source: Research Square preprint supplement (doi:10.21203/rs.3.rs-6199894/v1), 2025-07-07
Supplement: Supplementary file 11 [file Supplementary Table_6_EL4-Toe Flag-Tmem176b IP-MS.xlsx]

## Sheet: merge
Accession	Gene	#Spec LF-VECT-unstimu-1	#Spec LF-VECT-unstimu-2	#Spec LF-WT-unstimu-1	#Spec LF-WT-unstimu-2	#Spec LF-VECT-stimu-1	#Spec LF-VECT-stimu-2	#Spec LF-VECTOR-stimu-3	#Spec LF-WT-stimu-1	#Spec LF-WT-stimu-2	#Spec LF-WT-stimu-3	PTM	Description.y
A0A0R4J049	Prmt5	1474	1248	632	618	1585	1343	2192	492	639	912	Carbamidomethylation; Acetylation (Protein N-term); Oxidation (M)	Protein arginine N-methyltransferase 5 OS=Mus musculus OX=10090 GN=Prmt5 PE=1 SV=1
K3W4L0	Myo18a	0	0	223	343	0	0	693	272	0	337	Carbamidomethylation; Oxidation (M)	Unconventional myosin-XVIIIa OS=Mus musculus OX=10090 GN=Myo18a PE=1 SV=1
B2RRE2	Myo18a	1299	1195	223	343	0	0	0	272	0	337	Carbamidomethylation; Oxidation (M)	NA
E9QAX2	Myo18a	0	0	223	343	0	0	0	272	0	337	Carbamidomethylation; Oxidation (M)	NA
A0A1C7ZN10	Myo18a	1253	1136	223	333	1259	1087	673	267	280	331	Carbamidomethylation; Oxidation (M)	Unconventional myosin-XVIIIa OS=Mus musculus OX=10090 GN=Myo18a PE=1 SV=1
A0A0A6YY64	Pfkfb3	511	486	220	241	555	473	678	227	253	253	Carbamidomethylation; Oxidation (M)	6-phosphofructo-2-kinase/fructose-2 6-biphosphatase 3 OS=Mus musculus OX=10090 GN=Pfkfb3 PE=1 SV=1
A2AUP1	Pfkfb3	511	486	220	241	555	473	678	227	253	253	Carbamidomethylation; Oxidation (M)	6-phosphofructo-2-kinase/fructose-2 6-biphosphatase 3 OS=Mus musculus OX=10090 GN=Pfkfb3 PE=1 SV=1
Q3U3S6	Pfkfb3	516	489	222	241	561	473	685	223	253	0	NA	6-phosphofructo-2-kinase/fructose-2 6-biphosphatase 3 splice variant 4 OS=Mus musculus OX=10090 GN=Pfkfb3 PE=1 SV=1
Q3U2G2	Hspa4	18	10	317	136	16	12	6	156	299	38	Carbamidomethylation; Oxidation (M)	Heat shock 70 kDa protein 4 OS=Mus musculus OX=10090 GN=Hspa4 PE=1 SV=1
Q99NF7	Ppm1b	647	549	190	242	660	562	611	221	207	166	Carbamidomethylation; Oxidation (M)	Ppm1b protein OS=Mus musculus OX=10090 GN=Ppm1b PE=1 SV=1
B2RXM2	Gm6793	126	110	127	122	135	119	122	112	115	95	Carbamidomethylation; Acetylation (Protein N-term); Oxidation (M)	EG627828 protein OS=Mus musculus OX=10090 GN=Gm6793 PE=1 SV=1
Q923F1	Clns1a	396	376	151	176	429	362	437	161	187	231	Acetylation (Protein N-term); Oxidation (M)	Chloride channel nucleotide-sensitive 1A OS=Mus musculus OX=10090 GN=Clns1a PE=1 SV=1
A0A0G2JEP4	Lrrfip2	0	0	112	109	0	0	0	84	116	111	Carbamidomethylation; Oxidation (M)	NA
A2AL12	Hnrnpa3	115	90	104	99	124	106	109	85	97	0	NA	Heterogeneous nuclear ribonucleoprotein A3 OS=Mus musculus OX=10090 GN=Hnrnpa3 PE=1 SV=1
Q5EBP8	Hnrnpa1	0	90	101	91	0	97	0	92	110	44	Carbamidomethylation; Acetylation (Protein N-term); Oxidation (M)	NA
A0A0R4J169	Lrrfip2	0	0	0	102	0	0	0	0	0	0	NA	NA
Q3TH01	H2-K1	0	0	102	130	0	0	0	127	113	68	Carbamidomethylation; Oxidation (M)	NA
G3X956	Supt16	49	32	88	97	49	73	54	77	136	39	Carbamidomethylation; Acetylation (Protein N-term); Oxidation (M)	Suppressor of Ty 16 OS=Mus musculus OX=10090 GN=Supt16 PE=1 SV=1
E9Q7Q3	Tpm3	155	151	69	67	217	198	0	61	75	50	Acetylation (Protein N-term); Oxidation (M)	NA
Q9DAY9	Npm1	87	67	66	68	83	84	56	71	68	45	Carbamidomethylation; Acetylation (Protein N-term); Oxidation (M)	Nucleophosmin OS=Mus musculus OX=10090 GN=Npm1 PE=1 SV=1
A0A075B5P4	Ighg1	125	126	124	114	79	169	166	295	216	396	Carbamidomethylation; Acetylation (Protein N-term); Oxidation (M)	Ig gamma-1 chain C region secreted form (Fragment) OS=Mus musculus OX=10090 GN=Ighg1 PE=1 SV=1
A0A0A6YWR2	Ighg1	125	126	124	114	79	169	166	295	216	396	Carbamidomethylation; Acetylation (Protein N-term); Oxidation (M)	Ig gamma-1 chain C region secreted form (Fragment) OS=Mus musculus OX=10090 GN=Ighg1 PE=1 SV=1
Q8C2Q7	Hnrnph1	127	103	47	60	123	124	112	44	56	46	Carbamidomethylation; Acetylation (Protein N-term); Oxidation (M)	Heterogeneous nuclear ribonucleoprotein H OS=Mus musculus OX=10090 GN=Hnrnph1 PE=1 SV=1
B2M1R6	Hnrnpk	0	109	64	64	153	119	70	68	57	34	Carbamidomethylation; Oxidation (M)	Heterogeneous nuclear ribonucleoprotein K OS=Mus musculus OX=10090 GN=Hnrnpk PE=1 SV=1
Q8C845	Efhd2	33	18	61	48	26	40	24	60	42	36	Oxidation (M)	EF-hand domain-containing protein D2 OS=Mus musculus OX=10090 GN=Efhd2 PE=1 SV=1
Q8CFQ9	Fus	99	67	62	68	94	82	86	69	64	59	Carbamidomethylation; Oxidation (M)	Fusion derived from t(1216) malignant liposarcoma (Human) OS=Mus musculus OX=10090 GN=Fus PE=1 SV=1
A0A286YDA2	Nolc1	64	45	30	57	47	60	0	70	36	20	NA	NA
A0A286YDT3	Nolc1	0	45	30	57	0	0	0	70	36	20	NA	NA
A0A286YDV7	Nolc1	0	45	30	57	46	0	35	70	36	20	NA	Nucleolar and coiled-body phosphoprotein 1 (Fragment) OS=Mus musculus OX=10090 GN=Nolc1 PE=1 SV=1
Q8BQ46	Taf15	32	16	41	44	24	33	21	54	38	19	Carbamidomethylation; Oxidation (M)	TAF15 RNA polymerase II TATA box binding protein (TBP)-associated factor OS=Mus musculus OX=10090 GN=Taf15 PE=1 SV=1
A3KFU5	Pabpc4	79	68	24	33	81	76	79	23	29	20	Carbamidomethylation	Polyadenylate-binding protein OS=Mus musculus OX=10090 GN=Pabpc4 PE=1 SV=1
Q6PHQ9	Pabpc4	79	68	24	33	81	76	79	23	29	20	Carbamidomethylation	Polyadenylate-binding protein OS=Mus musculus OX=10090 GN=Pabpc4 PE=1 SV=1
B8JK33	Hnrnpm	0	0	0	56	0	0	0	58	0	0	NA	NA
B8JK32	Hnrnpm	0	0	0	56	0	0	0	58	0	0	NA	NA
Q9CPX4	Ftl1	5	4	39	44	7	0	0	40	56	26	Oxidation (M)	NA
F6YVP7	Rps18-ps6	57	49	52	58	57	50	10	71	59	21	Acetylation (Protein N-term); Oxidation (M)	Predicted gene 10260 OS=Mus musculus OX=10090 GN=Gm10260 PE=3 SV=2
Q20BD0	Hnrnpab	46	39	26	43	55	47	47	47	39	19	Carbamidomethylation; Oxidation (M)	Heterogeneous nuclear ribonucleoprotein A/B OS=Mus musculus OX=10090 GN=Hnrnpab PE=1 SV=1
B1ASP2	Jak1	285	246	31	46	282	207	141	49	38	59	Carbamidomethylation; Oxidation (M)	Tyrosine-protein kinase OS=Mus musculus OX=10090 GN=Jak1 PE=1 SV=1
A2AMW0	Capzb	157	164	61	48	176	158	160	30	48	50	Carbamidomethylation; Oxidation (M)	F-actin-capping protein subunit beta OS=Mus musculus OX=10090 GN=Capzb PE=1 SV=1
G5E8R2	Tpm1	106	100	43	40	115	127	0	30	36	22	Acetylation (Protein N-term); Oxidation (M)	NA
Q8BVQ9	Psmc2	78	61	30	37	72	68	81	36	41	32	Carbamidomethylation; Oxidation (M)	26S proteasome regulatory subunit 7 OS=Mus musculus OX=10090 GN=Psmc2 PE=1 SV=1
A2AGN7	Psmc3	0	0	28	38	0	0	0	38	38	0	NA	NA
A0A0A0MQF6	Gapdh	78	61	45	63	77	64	30	71	61	41	Carbamidomethylation; Oxidation (M)	Glyceraldehyde-3-phosphate dehydrogenase OS=Mus musculus OX=10090 GN=Gapdh PE=1 SV=1
H7BX95	Srsf1	113	107	51	48	117	88	104	45	42	25	Carbamidomethylation; Acetylation (Protein N-term)	Serine/arginine-rich-splicing factor 1 OS=Mus musculus OX=10090 GN=Srsf1 PE=1 SV=1
G5E924	Hnrnpl	63	52	47	45	57	57	48	56	46	36	Carbamidomethylation; Oxidation (M)	Heterogeneous nuclear ribonucleoprotein L (Fragment) OS=Mus musculus OX=10090 GN=Hnrnpl PE=1 SV=1
Q8BTS0	Ddx5	127	114	34	50	124	98	66	47	41	41	Carbamidomethylation; Oxidation (M)	DEAD (Asp-Glu-Ala-Asp) box polypeptide 5 OS=Mus musculus OX=10090 GN=Ddx5 PE=1 SV=1
B1ATZ0	NA	0	0	39	42	0	0	0	34	39	50	Carbamidomethylation; Oxidation (M)	NA
B1ATZ1	Hgs	0	0	39	42	0	0	0	34	39	50	Carbamidomethylation; Oxidation (M)	NA
Q3UMA3	Hgs	0	0	39	42	0	0	0	34	39	50	Carbamidomethylation; Oxidation (M)	NA
G5E866	Sf3b1	119	101	18	32	113	91	53	13	22	18	NA	Splicing factor 3B subunit 1 OS=Mus musculus OX=10090 GN=Sf3b1 PE=1 SV=1
Q5RKN9	Capza1	125	130	30	31	169	128	118	27	33	32	Carbamidomethylation; Acetylation (Protein N-term); Oxidation (M)	F-actin-capping protein subunit alpha OS=Mus musculus OX=10090 GN=Capza1 PE=1 SV=1
A0A0B4J1I0	Igkv1-110	41	0	0	40	23	0	59	146	0	0	NA	Immunoglobulin kappa variable 1-110 (Fragment) OS=Mus musculus OX=10090 GN=Igkv1-110 PE=4 SV=5
A0A494BAA4	Ndfip1	15	24	45	52	27	16	21	43	46	61	Oxidation (M)	NEDD4 family-interacting protein 1 OS=Mus musculus OX=10090 GN=Ndfip1 PE=1 SV=1
A0A0A0MQA5	Tuba4a	76	58	25	41	79	69	128	37	37	36	Carbamidomethylation; Oxidation (M)	Tubulin alpha chain (Fragment) OS=Mus musculus OX=10090 GN=Tuba4a PE=1 SV=1
E9Q9M1	Nt5c2	0	0	50	37	0	0	0	0	0	0	NA	NA
A0A494B9X3	Nt5c2	0	0	50	37	0	0	0	0	0	0	NA	NA
A1BN54	Actn1	88	82	89	52	86	92	33	89	35	0	NA	Alpha actinin 1a OS=Mus musculus OX=10090 GN=Actn1 PE=1 SV=1
G3UW85	Erh	79	74	31	35	76	63	7	31	36	0	NA	Enhancer of rudimentary homolog OS=Mus musculus OX=10090 GN=Erh PE=1 SV=1
F6RJ39	Acin1	65	52	5	26	46	42	39	17	13	15	Carbamidomethylation	Apoptotic chromatin condensation inducer in the nucleus (Fragment) OS=Mus musculus OX=10090 GN=Acin1 PE=1 SV=1
A0A0U1RQ96	Actg2	193	0	73	65	0	235	0	0	0	0	NA	NA
E9Q3Z5	Svil	279	301	9	33	307	301	43	23	17	5	NA	Supervillin OS=Mus musculus OX=10090 GN=Svil PE=1 SV=1
A0A1B0GS91	Svil	0	0	9	33	0	0	43	0	17	5	NA	Supervillin OS=Mus musculus OX=10090 GN=Svil PE=1 SV=1
G3UZI2	Syncrip	0	0	24	29	0	0	0	20	29	15	Carbamidomethylation	NA
G3V018	Syncrip	0	0	24	29	0	0	0	20	29	15	Carbamidomethylation	NA
A0A0R4J259	Syncrip	50	36	24	29	0	0	34	20	29	15	Carbamidomethylation	Heterogeneous nuclear ribonucleoprotein Q OS=Mus musculus OX=10090 GN=Syncrip PE=1 SV=1
A2AFJ1	Rbbp7	0	0	30	38	0	0	0	0	32	29	Carbamidomethylation; Acetylation (Protein N-term); Oxidation (M)	NA
B1AQR8	Lgals9	14	12	28	27	12	11	7	28	19	31	Carbamidomethylation; Oxidation (M)	Galectin OS=Mus musculus OX=10090 GN=Lgals9 PE=1 SV=1
G3X9T7	Lgals9	14	12	28	27	12	11	7	28	19	31	Carbamidomethylation; Oxidation (M)	Galectin OS=Mus musculus OX=10090 GN=Lgals9 PE=1 SV=1
A2AI52	Usp8	0	0	27	31	0	0	0	32	34	48	Carbamidomethylation; Oxidation (M)	NA
S4R1M2	Safb	20	20	22	28	11	9	15	22	18	9	Carbamidomethylation; Acetylation (Protein N-term)	Scaffold attachment factor B1 OS=Mus musculus OX=10090 GN=Safb PE=1 SV=1
Q5SUT0	Ewsr1	29	29	15	28	39	39	43	21	23	26	Carbamidomethylation; Oxidation (M)	RNA-binding protein EWS OS=Mus musculus OX=10090 GN=Ewsr1 PE=1 SV=1
Q5SUS9	Ewsr1	29	29	15	28	39	39	43	21	23	26	Carbamidomethylation; Oxidation (M)	RNA-binding protein EWS OS=Mus musculus OX=10090 GN=Ewsr1 PE=1 SV=1
A0A0R4J260	Otud4	257	245	14	30	258	214	194	20	8	0	NA	OTU domain-containing protein 4 OS=Mus musculus OX=10090 GN=Otud4 PE=1 SV=1
A0A1W2P7Q9	Myl6	150	148	28	36	171	154	19	32	39	4	Carbamidomethylation; Oxidation (M)	Myosin light polypeptide 6 OS=Mus musculus OX=10090 GN=Myl6 PE=1 SV=1
A0A1W2P6F6	Myl6	150	148	28	36	171	154	19	32	39	4	Carbamidomethylation; Oxidation (M)	Myosin light polypeptide 6 OS=Mus musculus OX=10090 GN=Myl6 PE=1 SV=1
Q9DCC5	Cbx3	30	22	34	39	29	26	11	63	38	6	Carbamidomethylation; Oxidation (M)	Cbx3 protein OS=Mus musculus OX=10090 GN=Cbx3 PE=1 SV=1
A0A171KXD3	Prmt1	94	0	45	37	0	0	0	35	43	57	Carbamidomethylation; Oxidation (M)	NA
Q3TMX0	Sdcbp	3	0	36	31	0	5	0	39	34	50	Carbamidomethylation; Acetylation (Protein N-term); Oxidation (M)	NA
Q3UH59	Myh10	158	129	7	25	165	159	0	19	0	7	NA	NA
Q5SV64	Myh10	158	129	7	25	165	159	0	19	0	7	NA	NA
A2AGH5	NA	8	8	21	25	10	8	5	27	23	14	Carbamidomethylation	Predicted gene 20489 OS=Mus musculus OX=10090 GN=Gm20489 PE=4 SV=1
G3UZ34	Eftud2	0	0	15	29	0	0	39	23	29	8	Carbamidomethylation	116 kDa U5 small nuclear ribonucleoprotein component OS=Mus musculus OX=10090 GN=Eftud2 PE=1 SV=1
A2AH85	Eftud2	80	75	15	29	78	61	39	23	29	8	Carbamidomethylation	116 kDa U5 small nuclear ribonucleoprotein component OS=Mus musculus OX=10090 GN=Eftud2 PE=1 SV=1
A0A2R8VHP3	Gm5478	70	42	87	52	64	53	55	42	57	81	NA	Predicted pseudogene 5478 OS=Mus musculus OX=10090 GN=Gm5478 PE=1 SV=1
Q921K2	Parp1	31	20	11	17	14	20	10	15	11	9	Carbamidomethylation	Poly [ADP-ribose] polymerase OS=Mus musculus OX=10090 GN=Parp1 PE=1 SV=1
Q8R5L1	C1qbp	43	35	20	20	42	36	36	25	22	18	Oxidation (M)	Complement component 1 Q subcomponent-binding protein mitochondrial OS=Mus musculus OX=10090 GN=C1qbp PE=1 SV=1
F8WGL3	Cfl1	54	51	38	29	55	53	3	42	32	5	Carbamidomethylation; Acetylation (Protein N-term)	Cofilin-1 OS=Mus musculus OX=10090 GN=Cfl1 PE=1 SV=1
Q8BGJ5	Ptbp1	47	34	27	22	38	36	21	23	27	14	Acetylation (Protein N-term); Oxidation (M)	MCG13402 isoform CRA_a OS=Mus musculus OX=10090 GN=Ptbp1 PE=1 SV=1
Q922I7	Ptbp1	47	34	27	22	0	36	21	23	27	14	Acetylation (Protein N-term); Oxidation (M)	MCG13402 isoform CRA_c OS=Mus musculus OX=10090 GN=Ptbp1 PE=1 SV=1
Q8CB58	Ptbp1	0	0	0	22	0	0	0	0	0	14	Acetylation (Protein N-term); Oxidation (M)	NA
E9Q133	Cct3	0	0	0	30	0	0	18	28	27	19	Carbamidomethylation; Oxidation (M)	T-complex protein 1 subunit gamma OS=Mus musculus OX=10090 GN=Cct3 PE=1 SV=1
E9Q3X0	Mvp	79	62	43	33	89	72	125	21	40	60	Carbamidomethylation; Oxidation (M)	Major vault protein OS=Mus musculus OX=10090 GN=Mvp PE=1 SV=1
A0A3Q4L335	Srsf7	0	42	25	32	0	35	40	30	29	17	Carbamidomethylation	MCG17902 isoform CRA_e OS=Mus musculus OX=10090 GN=Srsf7 PE=1 SV=1
A0A3Q4L393	Srsf7	49	42	25	32	55	35	40	30	29	17	Carbamidomethylation	Serine/arginine-rich-splicing factor 7 OS=Mus musculus OX=10090 GN=Srsf7 PE=1 SV=1
A0A3Q4EH04	Srsf7	0	42	25	32	0	35	40	30	29	17	Carbamidomethylation	MCG17902 isoform CRA_d OS=Mus musculus OX=10090 GN=Srsf7 PE=1 SV=1
Q6ZWQ9	Myl12a	95	92	16	20	102	82	4	14	20	0	NA	MCG5400 OS=Mus musculus OX=10090 GN=Myl12a PE=1 SV=1
E9QN08	Eef1d	22	24	25	21	25	30	26	25	21	13	Acetylation (Protein N-term); Oxidation (M)	Elongation factor 1-delta (Fragment) OS=Mus musculus OX=10090 GN=Eef1d PE=1 SV=1
Q80T06	Eef1d	22	24	25	21	25	30	26	25	21	13	Acetylation (Protein N-term); Oxidation (M)	Elongation factor 1-delta OS=Mus musculus OX=10090 GN=Eef1d PE=1 SV=1
A0A0R4J1H6	Golga3	0	0	1	19	0	0	0	6	7	30	NA	NA
E9QP99	Golga3	238	211	0	19	255	208	292	6	7	30	NA	Golgin subfamily A member 3 OS=Mus musculus OX=10090 GN=Golga3 PE=1 SV=1
Q3U741	Ddx17	67	57	18	24	59	49	43	24	23	21	Carbamidomethylation; Oxidation (M)	DEAD (Asp-Glu-Ala-Asp) box polypeptide 17 isoform CRA_a OS=Mus musculus OX=10090 GN=Ddx17 PE=1 SV=1
D3YWT1	Hnrnph3	15	9	4	14	15	16	10	13	10	6	Oxidation (M)	Heterogeneous nuclear ribonucleoprotein H3 OS=Mus musculus OX=10090 GN=Hnrnph3 PE=1 SV=1
D3Z3N4	Hnrnph3	15	9	4	14	15	16	10	13	10	6	Oxidation (M)	Heterogeneous nuclear ribonucleoprotein H3 OS=Mus musculus OX=10090 GN=Hnrnph3 PE=1 SV=1
H3BK44	Mia2	3	4	16	23	4	3	2	16	15	0	NA	Melanoma inhibitory activity protein 2 OS=Mus musculus OX=10090 GN=Mia2 PE=1 SV=1
E9PY90	Mia2	3	4	16	23	4	3	2	16	15	0	NA	Melanoma inhibitory activity protein 2 OS=Mus musculus OX=10090 GN=Mia2 PE=1 SV=1
H3BK48	Mia2	3	4	16	23	4	3	2	16	15	35	Carbamidomethylation; Oxidation (M)	Melanoma inhibitory activity protein 2 OS=Mus musculus OX=10090 GN=Mia2 PE=1 SV=1
E9Q3S2	Mia2	3	4	16	23	4	3	2	16	15	0	NA	Melanoma inhibitory activity protein 2 OS=Mus musculus OX=10090 GN=Mia2 PE=1 SV=1
H3BKH2	Mia2	3	4	16	23	4	3	2	16	15	35	Carbamidomethylation; Oxidation (M)	Melanoma inhibitory activity protein 2 OS=Mus musculus OX=10090 GN=Mia2 PE=1 SV=1
H3BJS0	Mia2	3	4	16	23	4	3	2	16	15	0	NA	Melanoma inhibitory activity protein 2 OS=Mus musculus OX=10090 GN=Mia2 PE=1 SV=1
A0A1W2P711	Mia2	3	4	16	23	4	3	2	16	15	0	NA	Melanoma inhibitory activity protein 2 OS=Mus musculus OX=10090 GN=Mia2 PE=1 SV=2
A2A547	Rpl19	25	24	3	17	23	26	21	23	3	9	NA	Ribosomal protein L19 OS=Mus musculus OX=10090 GN=Rpl19 PE=1 SV=1
E9Q1Z0	Krt90	57	0	53	38	51	30	44	37	35	47	Carbamidomethylation; Oxidation (M)	Keratin 90 OS=Mus musculus OX=10090 GN=Krt90 PE=1 SV=1
Q3UDC3	Tom1	2	4	16	22	3	2	4	15	19	34	Acetylation (Protein N-term); Oxidation (M)	Target of Myb protein 1 OS=Mus musculus OX=10090 GN=Tom1 PE=1 SV=1
E9QNN1	Dhx9	29	18	26	22	32	30	31	16	29	14	Carbamidomethylation	ATP-dependent RNA helicase A OS=Mus musculus OX=10090 GN=Dhx9 PE=1 SV=1
Q8VHM5	Hnrnpr	25	19	15	20	20	22	16	15	20	8	Carbamidomethylation	Heterogeneous nuclear ribonucleoprotein R OS=Mus musculus OX=10090 GN=Hnrnpr PE=1 SV=1
E9QP00	Tra2a	48	36	14	20	32	32	32	15	15	8	Acetylation (Protein N-term)	Transformer-2 protein homolog alpha OS=Mus musculus OX=10090 GN=Tra2a PE=1 SV=1
Q3U7K7	Trim21	37	27	10	13	46	33	22	30	18	27	Carbamidomethylation; Oxidation (M)	E3 ubiquitin-protein ligase TRIM21 OS=Mus musculus OX=10090 GN=Trim21 PE=1 SV=1
A0A087WRN1	Bclaf1	0	0	14	19	0	0	0	0	0	0	NA	NA
F8WI22	Bclaf1	174	159	14	19	146	120	115	11	14	27	NA	Bcl-2-associated transcription factor 1 OS=Mus musculus OX=10090 GN=Bclaf1 PE=1 SV=1
Q8C266	Rab5c	0	3	20	25	7	0	2	32	31	35	Oxidation (M)	Ras-related protein Rab-5C OS=Mus musculus OX=10090 GN=Rab5c PE=1 SV=1
A0A494B9G8	H2-K1	0	0	25	30	0	0	0	36	36	16	Carbamidomethylation; Oxidation (M)	NA
F8WJK8	St13	0	0	31	44	0	0	2	33	35	5	NA	Hsc70-interacting protein OS=Mus musculus OX=10090 GN=St13 PE=1 SV=1
A0A3B2WDD2	Rpl10a	0	33	10	27	0	0	28	19	14	15	Carbamidomethylation	Ribosomal protein OS=Mus musculus OX=10090 GN=Rpl10a PE=1 SV=1
Q5XJF6	Rpl10a	46	33	10	27	36	32	28	19	14	15	Carbamidomethylation	Ribosomal protein OS=Mus musculus OX=10090 GN=Rpl10a PE=1 SV=1
A0A3B2WBL1	Rpl10a	46	33	10	27	36	32	28	19	14	15	Carbamidomethylation	Ribosomal protein OS=Mus musculus OX=10090 GN=Rpl10a PE=1 SV=1
Q497W9	Dhx15	0	0	23	19	0	0	0	15	16	0	NA	NA
Q91V35	Ptpra	0	0	11	16	0	0	0	9	14	17	Carbamidomethylation	NA
B7ZNL2	Nap1l4	7	7	11	20	8	6	8	17	9	9	Acetylation (Protein N-term)	Nap1l4 protein OS=Mus musculus OX=10090 GN=Nap1l4 PE=1 SV=1
S4R1M0	Ptprc	7	6	14	18	8	7	1	13	17	30	Carbamidomethylation; Oxidation (M)	Receptor-type tyrosine-protein phosphatase C OS=Mus musculus OX=10090 GN=Ptprc PE=1 SV=1
A3KGL9	Hmgn2	23	14	21	31	26	22	1	25	20	0	NA	Non-histone chromosomal protein HMG-17 OS=Mus musculus OX=10090 GN=Hmgn2 PE=1 SV=1
F6W687	Hmgn2	23	14	21	31	26	22	1	25	20	0	NA	Non-histone chromosomal protein HMG-17 (Fragment) OS=Mus musculus OX=10090 GN=Hmgn2 PE=1 SV=1
E9QAI5	Cad	23	20	0	21	29	48	23	22	0	0	NA	CAD protein OS=Mus musculus OX=10090 GN=Cad PE=1 SV=1
Q3UGN9	Stam	0	0	9	14	0	0	0	9	13	15	Oxidation (M)	NA
A2ACG7	Rpn2	13	8	5	10	14	11	0	0	6	7	NA	NA
A2AWF9	Ptprj	0	0	5	12	0	0	0	10	10	11	NA	NA
E9Q4S7	Ptprj	0	0	5	12	0	0	0	10	10	11	NA	NA
A2AWF8	Ptprj	0	0	5	12	0	0	0	10	10	11	NA	NA
A0A3B2WCD8	Khsrp	20	20	10	15	23	25	23	18	12	7	NA	Far upstream element-binding protein 2 OS=Mus musculus OX=10090 GN=Khsrp PE=1 SV=1
F8WI35	H3f3a	8	5	27	37	7	5	2	44	34	13	NA	Histone H3 OS=Mus musculus OX=10090 GN=H3f3a PE=1 SV=1
A0A1W2P768	H3c14	8	5	27	37	7	5	2	44	34	13	NA	Histone H3.2 OS=Mus musculus OX=10090 GN=Hist2h3c1 PE=1 SV=1
B1AU75	Nasp	2	2	13	12	4	3	5	12	9	2	NA	Nuclear autoantigenic sperm protein OS=Mus musculus OX=10090 GN=Nasp PE=1 SV=1
A0A1B0GSR9	Ldha	24	24	18	21	25	28	0	17	20	32	Carbamidomethylation; Oxidation (M)	NA
Q564E2	Ldha	24	24	18	21	25	28	59	17	20	32	Carbamidomethylation; Oxidation (M)	L-lactate dehydrogenase OS=Mus musculus OX=10090 GN=Ldha PE=1 SV=1
A0A0R4J1G9	Steap3	3	1	20	23	4	5	0	19	23	28	Carbamidomethylation; Acetylation (Protein N-term); Oxidation (M)	NA
A0A2I3BRM6	Hnrnpc	19	17	0	18	21	17	21	0	0	0	NA	Heterogeneous nuclear ribonucleoproteins C1/C2 (Fragment) OS=Mus musculus OX=10090 GN=Hnrnpc PE=1 SV=1
Q3TF41	Nap1l1	16	11	17	22	20	13	12	14	17	6	NA	Nucleosome assembly protein 1-like 1 OS=Mus musculus OX=10090 GN=Nap1l1 PE=1 SV=1
Q8BSH9	Nap1l1	16	11	17	22	20	13	12	14	17	6	NA	Nucleosome assembly protein 1-like 1 OS=Mus musculus OX=10090 GN=Nap1l1 PE=1 SV=1
A0A0G2JDW7	Rps27	17	20	16	16	0	14	0	0	13	1	Carbamidomethylation	NA
A0A0U1RNJ1	Fasn	1	0	1	21	0	10	1	18	0	0	NA	Fatty acid synthase OS=Mus musculus OX=10090 GN=Fasn PE=1 SV=1
Q3UJB0	Sf3b2	87	82	13	23	90	72	57	11	16	11	NA	Splicing factor 3b subunit 2 OS=Mus musculus OX=10090 GN=Sf3b2 PE=1 SV=1
A0A1Y7VMH7	Kidins220	0	0	7	16	0	0	0	0	12	0	NA	NA
A0A1Y7VME9	Kidins220	0	0	7	16	0	0	0	12	12	28	Carbamidomethylation; Oxidation (M)	NA
E9Q9B7	Kidins220	0	0	7	16	0	0	0	12	12	28	Carbamidomethylation; Oxidation (M)	NA
Q921R2	Rps13	0	28	10	17	29	26	0	19	15	1	NA	NA
A2AKU9	Atp5f1c	0	0	0	13	0	0	16	0	0	19	Carbamidomethylation; Oxidation (M)	ATP synthase subunit gamma OS=Mus musculus OX=10090 GN=Atp5c1 PE=1 SV=1
Q8C2Q8	Atp5f1c	15	14	15	13	23	17	16	9	15	19	Carbamidomethylation; Oxidation (M)	ATP synthase subunit gamma OS=Mus musculus OX=10090 GN=Atp5c1 PE=1 SV=1
F8WHL2	Copa	31	28	9	16	29	26	6	12	13	13	NA	Coatomer subunit alpha OS=Mus musculus OX=10090 GN=Copa PE=1 SV=1
A0A0R4J1C7	Mfap3	0	1	14	17	0	0	0	18	22	18	Carbamidomethylation	NA
A0A1B0GR18	Mob2	57	55	24	22	64	61	57	22	32	9	NA	MOB kinase activator 2 OS=Mus musculus OX=10090 GN=Mob2 PE=1 SV=1
E9Q696	Lck	0	4	12	16	15	9	5	11	13	17	Carbamidomethylation	Tyrosine-protein kinase OS=Mus musculus OX=10090 GN=Lck PE=1 SV=1
V9GX00	Il6st	0	1	13	17	1	1	1	12	16	26	Carbamidomethylation; Oxidation (M)	Interleukin-6 receptor subunit beta OS=Mus musculus OX=10090 GN=Il6st PE=1 SV=1
Q9D3L3	Snap23	0	0	8	8	0	0	0	9	8	10	Acetylation (Protein N-term); Oxidation (M)	NA
D3Z656	Synj1	103	85	5	12	97	84	24	18	13	17	Carbamidomethylation	Synaptojanin-1 OS=Mus musculus OX=10090 GN=Synj1 PE=1 SV=1
Q78ZM0	Snx3	0	0	11	13	0	0	0	14	15	0	NA	NA
Q5SXR6	Cltc	81	60	5	14	96	81	24	10	15	14	Carbamidomethylation	Clathrin heavy chain OS=Mus musculus OX=10090 GN=Cltc PE=1 SV=1
F6X2V9	Lsm14a	37	34	0	14	42	27	36	0	0	0	NA	Protein LSM14 homolog A (Fragment) OS=Mus musculus OX=10090 GN=Lsm14a PE=1 SV=2
Q91Z25	Arpc1b	55	60	19	11	57	53	65	15	14	8	Carbamidomethylation	Actin-related protein 2/3 complex subunit OS=Mus musculus OX=10090 GN=Arpc1b PE=1 SV=1
V9GX38	NA	19	0	0	18	0	0	0	13	18	0	NA	NA
Z4YJV4	Ogdh	4	3	19	16	4	3	3	19	20	14	Carbamidomethylation; Oxidation (M)	2-oxoglutarate dehydrogenase mitochondrial OS=Mus musculus OX=10090 GN=Ogdh PE=1 SV=1
G3X927	Ccdc9	22	15	3	11	16	17	24	7	4	8	NA	Coiled-coil domain-containing protein 9 OS=Mus musculus OX=10090 GN=Ccdc9 PE=1 SV=1
D3YW42	Ccdc9	22	15	3	11	16	17	24	7	4	8	NA	Coiled-coil domain-containing protein 9 OS=Mus musculus OX=10090 GN=Ccdc9 PE=1 SV=2
A2AWT6	Ubtf	0	4	9	17	16	12	40	11	52	7	NA	Nucleolar transcription factor 1 OS=Mus musculus OX=10090 GN=Ubtf PE=1 SV=1
A2AWT7	Ubtf	6	4	9	17	16	12	40	11	52	7	NA	Nucleolar transcription factor 1 OS=Mus musculus OX=10090 GN=Ubtf PE=1 SV=1
A2AWT5	Ubtf	0	4	9	17	0	12	0	11	52	7	NA	NA
A0A0R4J0N8	Cxcr4	2	0	8	10	0	0	0	10	12	9	NA	NA
A0A1W2P733	Mthfd1	32	25	13	17	36	19	21	16	13	11	NA	C-1-tetrahydrofolate synthase cytoplasmic OS=Mus musculus OX=10090 GN=Mthfd1 PE=1 SV=1
A0A2R8VI25	Pcbp2	0	0	5	7	0	0	0	0	0	9	Carbamidomethylation; Oxidation (M)	NA
Q3TT81	Pcbp2	0	0	5	7	18	0	0	0	0	9	Carbamidomethylation; Oxidation (M)	NA
A0A2R8VHP9	Pcbp2	0	0	5	7	18	0	0	0	0	9	Carbamidomethylation; Oxidation (M)	NA
B2M1R7	Pcbp2	19	15	5	7	20	15	11	11	12	9	Carbamidomethylation; Oxidation (M)	Poly(rC)-binding protein 2 OS=Mus musculus OX=10090 GN=Pcbp2 PE=1 SV=1
Q3TUE1	Fubp1	32	24	10	13	28	24	13	14	8	13	Carbamidomethylation	Far upstream element-binding protein 1 OS=Mus musculus OX=10090 GN=Fubp1 PE=1 SV=1
A0A0G2JGW9	Fubp1	32	24	10	13	28	24	13	14	8	13	Carbamidomethylation	Far upstream element-binding protein 1 OS=Mus musculus OX=10090 GN=Fubp1 PE=1 SV=1
A0A0G2JFY5	Fubp1	32	24	10	13	28	24	13	14	8	13	Carbamidomethylation	Far upstream element-binding protein 1 OS=Mus musculus OX=10090 GN=Fubp1 PE=1 SV=1
Q3UUU2	Fubp1	32	24	10	13	28	24	13	14	8	13	Carbamidomethylation	Far upstream element-binding protein 1 OS=Mus musculus OX=10090 GN=Fubp1 PE=1 SV=1
E9QN31	Nop2	7	0	0	10	6	8	4	9	0	0	NA	Probable 28S rRNA (cytosine-C(5))-methyltransferase OS=Mus musculus OX=10090 GN=Nop2 PE=1 SV=1
Q5M8M8	Rpl29	15	16	4	12	17	15	12	15	3	9	NA	60S ribosomal protein L29 OS=Mus musculus OX=10090 GN=Rpl29 PE=1 SV=1
Q5SXA5	Tom1l2	0	0	9	10	0	0	0	13	9	12	Oxidation (M)	NA
F6RT43	Ndfip2	3	1	10	11	1	1	1	9	9	18	Carbamidomethylation; Oxidation (M)	NEDD4 family-interacting protein 2 (Fragment) OS=Mus musculus OX=10090 GN=Ndfip2 PE=1 SV=1
M0QWK1	Ndfip2	3	1	10	11	1	1	1	9	9	18	Carbamidomethylation; Oxidation (M)	NEDD4 family-interacting protein 2 OS=Mus musculus OX=10090 GN=Ndfip2 PE=1 SV=1
A2AMV1	Mrto4	15	13	7	14	13	18	7	7	12	0	NA	Ribosome assembly factor mrt4 OS=Mus musculus OX=10090 GN=Mrto4 PE=1 SV=1
A8DUK4	Hbb-bs	6	6	7	8	16	8	4	22	10	7	Oxidation (M)	Beta-globin OS=Mus musculus OX=10090 GN=Hbb-bs PE=1 SV=1
E9Q223	Hbb-bs	6	6	7	8	0	8	4	0	10	7	Oxidation (M)	Hemoglobin beta adult s chain (Fragment) OS=Mus musculus OX=10090 GN=Hbb-bs PE=1 SV=1
Q3ULG5	Mcm6	9	5	10	7	9	6	4	10	7	3	NA	DNA helicase OS=Mus musculus OX=10090 GN=Mcm6 PE=1 SV=1
E9PX73	Ly9	4	0	0	12	0	0	0	0	0	0	NA	NA
D3YYM6	Rps5	37	30	16	13	36	35	8	24	18	11	Carbamidomethylation; Acetylation (Protein N-term)	40S ribosomal protein S5 (Fragment) OS=Mus musculus OX=10090 GN=Rps5 PE=1 SV=1
D3Z1S8	Rps5	37	30	16	13	36	35	8	24	18	11	Carbamidomethylation; Acetylation (Protein N-term)	40S ribosomal protein S5 (Fragment) OS=Mus musculus OX=10090 GN=Rps5 PE=1 SV=1
Q91V55	Rps5	37	30	16	13	36	35	8	24	18	11	Carbamidomethylation; Acetylation (Protein N-term)	40S ribosomal protein S5 OS=Mus musculus OX=10090 GN=Rps5 PE=1 SV=1
E9Q585	Slc4a1ap	70	48	16	20	57	54	53	0	13	16	Carbamidomethylation; Oxidation (M)	Solute carrier family 4 (anion exchanger) member 1 adaptor protein OS=Mus musculus OX=10090 GN=Slc4a1ap PE=1 SV=1
Q8C605	Pfkp	54	44	7	9	46	40	27	10	0	8	NA	ATP-dependent 6-phosphofructokinase OS=Mus musculus OX=10090 GN=Pfkp PE=1 SV=1
A0A494BAP2	Csnk1g3	0	0	8	10	0	0	0	13	13	16	Carbamidomethylation	NA
E9PWY9	Farsa	19	16	7	12	21	16	10	9	10	11	Acetylation (Protein N-term)	Phenylalanine--tRNA ligase alpha subunit OS=Mus musculus OX=10090 GN=Farsa PE=1 SV=1
Q6ZWZ6	Rps12	22	20	6	12	18	17	7	15	12	6	Carbamidomethylation	40S ribosomal protein S12 OS=Mus musculus OX=10090 GN=Rps12-ps3 PE=1 SV=1
F7AEH4	Rps12	22	20	6	12	18	17	7	15	12	6	Carbamidomethylation	40S ribosomal protein S12 OS=Mus musculus OX=10090 GN=Rps12 PE=1 SV=1
A2BGI8	Ppih	0	4	7	9	5	0	0	12	13	0	NA	NA
F8WJ41	Rps15a	15	10	8	10	0	0	0	13	9	0	NA	NA
A0A140LHA2	Bub3	6	5	11	12	11	8	13	9	10	16	Carbamidomethylation; Oxidation (M)	Mitotic checkpoint protein BUB3 OS=Mus musculus OX=10090 GN=Bub3 PE=1 SV=1
B1AU25	Aifm1	21	16	12	11	18	19	17	11	13	10	Oxidation (M)	Apoptosis-inducing factor 1 mitochondrial OS=Mus musculus OX=10090 GN=Aifm1 PE=1 SV=1
Q3TFP0	Srsf10	19	20	14	11	17	15	20	12	11	0	NA	Serine/arginine-rich-splicing factor 10 OS=Mus musculus OX=10090 GN=Srsf10 PE=1 SV=1
Q3TCU5	Tapbp	5	2	7	11	2	2	3	16	9	6	NA	Tapasin OS=Mus musculus OX=10090 GN=Tapbp PE=1 SV=1
G5E8H3	Ikzf1	23	20	7	7	22	16	22	12	5	5	NA	DNA-binding protein Ikaros OS=Mus musculus OX=10090 GN=Ikzf1 PE=1 SV=1
Q5SWT9	Ikzf1	23	20	7	7	22	16	22	12	5	5	NA	DNA-binding protein Ikaros OS=Mus musculus OX=10090 GN=Ikzf1 PE=1 SV=1
A0A0R4J008	Hdac2	17	20	10	10	19	9	31	0	8	9	Oxidation (M)	Histone deacetylase OS=Mus musculus OX=10090 GN=Hdac2 PE=1 SV=1
E9Q9C4	Ablim1	0	0	4	10	0	0	0	5	6	0	NA	NA
E9Q9C0	Ablim1	0	0	4	10	0	0	0	5	6	4	NA	NA
E9Q9C1	Ablim1	55	0	4	10	0	0	0	5	6	4	NA	NA
E9Q9C2	Ablim1	0	0	4	10	0	0	0	5	6	0	NA	NA
E9Q9C7	Ablim1	55	0	4	10	0	78	72	5	6	0	NA	Actin-binding LIM protein 1 OS=Mus musculus OX=10090 GN=Ablim1 PE=1 SV=1
E9QK41	Ablim1	0	0	4	10	0	0	0	5	6	0	NA	NA
E9Q9D1	Ablim1	58	57	4	10	0	80	72	5	6	0	NA	Actin-binding LIM protein 1 OS=Mus musculus OX=10090 GN=Ablim1 PE=1 SV=1
E9Q9D2	Ablim1	58	57	4	10	0	80	72	5	6	0	NA	Actin-binding LIM protein 1 OS=Mus musculus OX=10090 GN=Ablim1 PE=1 SV=1
E9Q030	Ablim1	58	0	4	10	0	0	0	5	6	0	NA	NA
E9Q9Q7	Ablim1	0	0	4	10	0	0	0	0	0	4	NA	NA
Q9JHF5	Tcirg1	0	0	0	9	0	0	0	0	4	0	NA	NA
Q91VB8	Hba-a1	8	9	15	17	20	11	11	30	14	8	Oxidation (M)	Alpha globin 1 OS=Mus musculus OX=10090 GN=Hba-a1 PE=1 SV=1
K3W4S5	Sema6a	0	0	10	10	0	0	0	7	8	12	Carbamidomethylation; Oxidation (M)	NA
D3YWM8	Sema6a	0	0	10	10	0	0	0	7	8	12	Carbamidomethylation; Oxidation (M)	NA
J7NUP1	Irgm1	4	0	7	13	6	4	0	13	9	14	Carbamidomethylation; Acetylation (Protein N-term)	NA
A0A0B4J1E2	Snw1	42	39	9	12	42	31	22	12	11	0	NA	SNW domain-containing protein 1 OS=Mus musculus OX=10090 GN=Snw1 PE=1 SV=1
A0A0R4J195	Rprd1b	17	5	3	12	9	16	0	16	1	0	NA	NA
Q9DCE9	Igtp	5	0	0	6	6	5	3	5	0	4	Oxidation (M)	Interferon gamma-induced GTPase OS=Mus musculus OX=10090 GN=Igtp PE=1 SV=1
Q6PFB2	Rcc1	8	7	7	10	6	8	2	9	15	5	NA	Rcc1 protein OS=Mus musculus OX=10090 GN=Rcc1 PE=1 SV=1
A2AU62	Raly	19	14	12	14	9	17	9	16	17	6	NA	RNA-binding protein Raly (Fragment) OS=Mus musculus OX=10090 GN=Raly PE=1 SV=1
A2AU61	Raly	0	0	0	14	0	17	9	16	17	0	NA	RNA-binding protein Raly (Fragment) OS=Mus musculus OX=10090 GN=Raly PE=1 SV=1
A8C1R4	Timd2	0	0	10	10	0	0	2	9	11	15	Carbamidomethylation	G9D3 protein OS=Mus musculus OX=10090 GN=Timd2 PE=2 SV=1
A0A494B9Z0	Fau	12	10	3	10	15	15	7	9	5	5	NA	40S ribosomal protein S30 OS=Mus musculus OX=10090 GN=Fau PE=1 SV=1
A0A494BBA8	Fau	12	10	3	10	15	15	7	9	5	5	NA	40S ribosomal protein S30 OS=Mus musculus OX=10090 GN=Fau PE=1 SV=1
Q642K5	Fau	12	10	3	10	15	15	7	9	5	5	NA	40S ribosomal protein S30 OS=Mus musculus OX=10090 GN=Fau PE=1 SV=1
Q9CQM8	Rpl21	0	0	0	15	34	0	11	0	0	6	Oxidation (M)	60S ribosomal protein L21 OS=Mus musculus OX=10090 GN=Rpl21 PE=1 SV=1
O88325	Naglu	0	0	9	7	0	0	0	5	11	12	NA	NA
A0A2I3BQF4	Rpl30	0	0	0	8	0	9	0	0	0	0	NA	NA
A0A0R4J256	Psmb9	0	0	11	10	7	0	6	7	8	0	NA	Proteasome subunit beta OS=Mus musculus OX=10090 GN=Psmb9 PE=1 SV=1
A0A087WQE6	Eloc	0	4	7	6	7	8	0	9	8	0	NA	NA
A0A087WNT1	Eloc	0	4	7	6	7	8	0	0	8	0	NA	NA
A2AQR0	Gpd2	0	2	4	9	3	4	0	12	6	9	NA	NA
Q6ZWZ7	Rpl17	26	18	8	10	29	22	13	13	5	4	NA	60S ribosomal protein L17 OS=Mus musculus OX=10090 GN=Rpl17 PE=1 SV=1
A0A0N4SW50	Tmem168	0	0	0	7	0	0	0	8	5	10	NA	NA
A0A1L1STE4	Ilf3	21	11	5	6	20	12	13	7	6	5	NA	Interleukin enhancer-binding factor 3 OS=Mus musculus OX=10090 GN=Ilf3 PE=1 SV=1
Q45VK5	Ilf3	0	11	0	6	0	12	0	0	6	5	NA	NA
G3UY42	Pabpn1	26	18	4	5	23	13	23	7	5	4	Carbamidomethylation; Acetylation (Protein N-term)	Polyadenylate-binding protein 2 OS=Mus musculus OX=10090 GN=Pabpn1 PE=1 SV=1
A0A0N4SVS6	Cnbp	14	11	0	6	11	11	0	6	4	0	NA	NA
A0A1L1SQA8	Rps25	20	15	8	11	17	14	1	13	9	2	NA	40S ribosomal protein S25 OS=Mus musculus OX=10090 GN=Rps25 PE=1 SV=1
A0A0B4J1E6	Fcgr2b	20	18	9	12	20	19	14	5	8	9	NA	Fc receptor IgG low affinity IIb OS=Mus musculus OX=10090 GN=Fcgr2b PE=1 SV=1
Q91XH6	Vti1b	0	0	5	8	0	0	0	9	7	12	Acetylation (Protein N-term)	NA
D3Z158	Qars1	15	6	7	11	14	11	9	10	0	8	NA	Glutamine--tRNA ligase OS=Mus musculus OX=10090 GN=Qars PE=1 SV=2
A0A2R8VKL5	Larp4	24	30	4	11	24	25	27	10	5	7	NA	La-related protein 4 OS=Mus musculus OX=10090 GN=Larp4 PE=1 SV=1
E9Q066	Larp4	24	30	4	11	24	25	27	10	5	7	NA	La-related protein 4 OS=Mus musculus OX=10090 GN=Larp4 PE=1 SV=1
G3X9Q6	Larp4	24	30	4	11	24	25	27	10	5	7	NA	La-related protein 4 OS=Mus musculus OX=10090 GN=Larp4 PE=1 SV=1
G3UZP7	H2-D1	0	0	9	10	0	0	0	9	16	7	Oxidation (M)	NA
A0A0R4J098	Zfp326	26	25	8	10	15	18	9	7	9	0	NA	Zinc finger protein 326 OS=Mus musculus OX=10090 GN=Zfp326 PE=1 SV=1
Q5SWN2	Rpa1	7	3	0	6	6	6	2	6	0	1	NA	Replication protein A subunit OS=Mus musculus OX=10090 GN=Rpa1 PE=1 SV=2
D3Z4V1	Plrg1	0	31	2	6	25	16	0	0	7	6	Oxidation (M)	NA
F8WGM5	Stxbp2	4	0	8	8	0	0	0	12	8	0	NA	NA
E9PXM6	Slc29a1	0	0	0	10	1	0	0	0	0	0	NA	NA
D3YZ62	Myo5a	211	208	1	6	0	209	12	2	2	0	NA	Unconventional myosin-Va OS=Mus musculus OX=10090 GN=Myo5a PE=1 SV=1
D3Z4J3	Myo5a	211	208	1	6	205	209	12	2	2	0	NA	Unconventional myosin-Va OS=Mus musculus OX=10090 GN=Myo5a PE=1 SV=1
A0A338P6G6	Hmga1	0	0	2	7	3	0	0	6	7	0	NA	NA
A0A384DV79	Hmga1	0	0	2	7	3	0	0	6	7	0	NA	NA
A0A0R4J1Q0	Edc4	1	1	0	9	2	1	0	2	1	0	NA	NA
G5E896	Edc4	1	1	0	9	0	0	0	2	1	0	NA	NA
A0A1Y7VMH3	Vrk1	5	0	4	10	5	0	1	0	0	0	NA	Serine/threonine-protein kinase VRK1 OS=Mus musculus OX=10090 GN=Vrk1 PE=1 SV=1
A6ZI44	Aldoa	7	6	9	7	9	4	24	6	7	18	Oxidation (M)	Fructose-bisphosphate aldolase OS=Mus musculus OX=10090 GN=Aldoa PE=1 SV=1
A0A0A0MQD4	9530068E07Rik	4	3	9	10	3	5	1	11	12	8	Oxidation (M)	RIKEN cDNA 9530068E07 gene OS=Mus musculus OX=10090 GN=9530068E07Rik PE=1 SV=1
A0A0A0MQK3	Srebf1	0	0	8	7	0	0	0	5	6	7	NA	NA
F6XZS9	Srebf1	0	0	8	7	0	0	0	5	6	7	NA	NA
Q3TLP8	Rac1	5	3	11	7	6	3	0	12	14	2	NA	NA
A0A1D5RLL3	Efr3a	0	1	7	6	0	0	0	5	9	9	Carbamidomethylation	NA
Q3TGU7	Pa2g4	4	0	8	6	0	4	0	11	3	0	NA	NA
Q9D5H8	Tgfbr1	0	0	11	12	0	0	0	7	13	19	Carbamidomethylation; Oxidation (M)	NA
E9Q418	Tgfbr1	0	0	11	12	0	0	0	7	13	19	Carbamidomethylation; Oxidation (M)	NA
Q9CQ43	Dut	8	7	11	9	9	8	0	9	12	0	NA	NA
A0A1L1SRE8	Ldlr	2	0	4	6	0	0	0	5	7	5	Carbamidomethylation	NA
A0A1D5RLW5	Rpl18a	16	16	0	7	18	10	13	11	2	4	Carbamidomethylation	60S ribosomal protein L18a OS=Mus musculus OX=10090 GN=Rpl18a PE=1 SV=1
A0A0A0MQM0	Eif5a	2	5	2	7	10	6	0	3	8	0	NA	NA
A2A839	Epb41	26	23	8	7	20	19	15	9	9	12	NA	Protein 4.1 OS=Mus musculus OX=10090 GN=Epb41 PE=1 SV=1
A2A838	Epb41	26	23	8	7	20	19	15	9	9	12	NA	Protein 4.1 (Fragment) OS=Mus musculus OX=10090 GN=Epb41 PE=1 SV=1
A2A842	Epb41	0	0	8	7	0	0	15	9	9	12	NA	Protein 4.1 OS=Mus musculus OX=10090 GN=Epb41 PE=1 SV=1
A2A841	Epb41	26	23	8	7	20	19	15	9	9	12	NA	Protein 4.1 OS=Mus musculus OX=10090 GN=Epb41 PE=1 SV=1
Q5SW88	Rab1a	8	6	8	10	7	8	0	11	10	6	NA	NA
A0A0G2JES3	Rpl9	10	6	7	8	15	7	6	13	13	4	NA	60S ribosomal protein L9 (Fragment) OS=Mus musculus OX=10090 GN=Rpl9 PE=1 SV=1
Q542V3	Srsf4	10	10	6	8	11	8	12	8	0	8	NA	Serine/arginine-rich-splicing factor 4 OS=Mus musculus OX=10090 GN=Srsf4 PE=1 SV=1
A0A494B9R5	Wdr4	18	13	8	8	23	17	19	8	6	0	NA	tRNA (guanine-N(7)-)-methyltransferase non-catalytic subunit WDR4 (Fragment) OS=Mus musculus OX=10090 GN=Wdr4 PE=1 SV=1
D2CKI9	Ulbp1	0	0	3	4	1	0	0	3	6	5	Carbamidomethylation	NA
Q8HWA3	Ulbp1	0	0	3	4	1	0	0	3	6	5	Carbamidomethylation	NA
A0A0G2JEP0	Fxr1	0	0	0	6	0	0	0	3	4	1	NA	NA
D3Z634	Adgrl3	0	0	0	4	0	0	0	6	3	11	NA	NA
D3Z593	Adgrl3	0	0	0	4	0	0	0	6	3	11	NA	NA
D3Z3G4	Adgrl3	0	0	0	4	0	0	0	6	3	11	NA	NA
D3YTW7	Adgrl3	0	0	0	4	0	0	0	6	3	11	NA	NA
K3W4M8	Adgrl3	0	0	1	4	0	0	0	6	3	11	NA	NA
D3YVT9	Adgrl3	0	0	0	4	0	0	0	6	3	11	NA	NA
D3Z4S7	Adgrl3	0	0	1	4	0	0	0	6	3	11	NA	NA
D3Z5M6	Adgrl3	0	0	0	4	0	0	0	6	3	11	NA	NA
B0QZN5	Vamp2	0	0	5	10	0	0	0	11	5	0	NA	NA
Q8BFU4	Rgs19	0	0	9	8	0	0	1	8	9	9	Carbamidomethylation	GAIP/RGS19 short isoform OS=Mus musculus OX=10090 GN=Rgs19 PE=1 SV=1
B7ZCT1	Rgs19	0	0	9	8	0	0	1	8	9	9	Carbamidomethylation	Regulator of G-protein-signaling 19 OS=Mus musculus OX=10090 GN=Rgs19 PE=1 SV=1
Q5SQ20	Pes1	11	8	3	8	8	9	4	6	5	5	Oxidation (M)	Pescadillo homolog OS=Mus musculus OX=10090 GN=Pes1 PE=1 SV=1
Q3UJH4	Rhox5	10	9	4	4	8	7	6	6	0	10	Carbamidomethylation	Homeobox protein Rhox5 OS=Mus musculus OX=10090 GN=Rhox5 PE=1 SV=1
V9GXJ4	Rhox5	10	9	4	4	8	7	6	6	0	10	Carbamidomethylation	Homeobox protein Rhox5 (Fragment) OS=Mus musculus OX=10090 GN=Rhox5 PE=1 SV=1
A0A1L1SS10	Keap1	34	32	2	5	33	25	0	1	3	5	NA	NA
Q8BMS7	Atp2c1	0	0	6	6	0	0	0	7	10	18	Carbamidomethylation; Oxidation (M)	NA
H3BLI6	Atp2c1	0	0	0	6	0	0	0	7	10	18	Carbamidomethylation; Oxidation (M)	NA
H3BL44	Atp2c1	0	0	6	6	0	0	0	7	10	18	Carbamidomethylation; Oxidation (M)	NA
H3BIX7	Atp2c1	0	0	0	6	0	0	0	7	10	18	Carbamidomethylation; Oxidation (M)	NA
Q3UZR5	Atp2c1	0	0	0	6	0	0	0	7	10	18	Carbamidomethylation; Oxidation (M)	NA
A0A0U1RP94	Csnk1g1	0	0	7	8	1	0	0	9	10	12	Carbamidomethylation	NA
B1ATS4	Atp2a3	13	5	2	6	8	6	2	7	3	12	Carbamidomethylation; Acetylation (Protein N-term)	Calcium-transporting ATPase OS=Mus musculus OX=10090 GN=Atp2a3 PE=1 SV=1
B1ATS5	Atp2a3	13	5	2	6	8	6	2	7	0	12	Carbamidomethylation; Acetylation (Protein N-term)	Calcium-transporting ATPase OS=Mus musculus OX=10090 GN=Atp2a3 PE=1 SV=1
E9Q559	Atp2a3	13	5	2	6	8	6	2	7	0	12	Carbamidomethylation; Acetylation (Protein N-term)	Calcium-transporting ATPase OS=Mus musculus OX=10090 GN=Atp2a3 PE=1 SV=1
A0A494BAX5	Nars1	9	7	4	5	0	7	7	0	4	0	NA	Asparagine--tRNA ligase cytoplasmic (Fragment) OS=Mus musculus OX=10090 GN=Nars PE=1 SV=1
A0A498WGK2	Nars1	9	7	4	5	14	7	7	0	4	2	NA	Asparagine--tRNA ligase cytoplasmic OS=Mus musculus OX=10090 GN=Nars PE=4 SV=1
V9GXF8	NA	0	5	0	6	8	4	0	5	0	0	NA	NA
E9Q800	Immt	79	52	0	7	67	0	0	0	8	0	NA	NA
B1AZS9	Prdx4	0	5	0	5	0	0	0	0	4	0	NA	NA
G3UYZ1	Igsf8	0	0	2	5	0	0	0	3	4	5	NA	NA
A0A0R4J117	Igsf8	0	0	2	5	0	0	0	3	4	5	NA	NA
Q9Z1M2	Irgm2	0	1	3	5	3	0	0	0	2	5	Oxidation (M)	NA
A0A140LIF8	Irgm2	0	1	3	5	3	0	0	0	2	5	Oxidation (M)	NA
Q80XR5	U2af2	13	3	3	4	14	11	6	6	1	0	NA	U2 snRNP auxiliary factor large subunit OS=Mus musculus OX=10090 GN=U2af2 PE=1 SV=1
Q6ZWZ4	Rpl36	14	13	0	8	23	12	0	8	2	0	NA	NA
A0A0U1RP03	Lat	0	0	6	7	1	0	0	4	0	4	NA	NA
Q7M739	Tpr	0	0	0	5	0	1	0	2	0	0	NA	NA
A0A494BA38	Rab1b	0	0	0	8	0	0	4	0	0	6	NA	Ras-related protein Rab-1B OS=Mus musculus OX=10090 GN=Rab1b PE=1 SV=1
D3YZ57	Fyn	0	0	5	8	0	0	0	6	8	12	NA	NA
Q3V117	Acly	6	9	8	5	8	8	14	0	5	5	Carbamidomethylation; Oxidation (M)	ATP-citrate synthase OS=Mus musculus OX=10090 GN=Acly PE=1 SV=1
A0A0G2JGP1	Crlf2	0	0	4	5	0	0	0	4	2	3	NA	NA
A0A0R4J0F5	Crlf2	0	0	4	5	0	0	0	4	2	3	NA	NA
Q3U6K9	Psat1	0	0	5	4	0	1	0	0	0	4	NA	NA
H3BKN0	Nsun2	18	12	2	6	13	12	7	5	6	2	NA	tRNA (cytosine(34)-C(5))-methyltransferase OS=Mus musculus OX=10090 GN=Nsun2 PE=1 SV=1
A2A7F6	Clcn6	0	0	3	6	0	0	0	5	5	8	Carbamidomethylation; Oxidation (M)	NA
E9Q741	Clcn6	0	0	3	6	0	0	0	5	0	0	NA	NA
A0A0R4J170	Smarca4	40	38	0	5	34	30	2	0	0	0	NA	Transcription activator BRG1 OS=Mus musculus OX=10090 GN=Smarca4 PE=1 SV=1
A0A1B0GT26	Bnip3	1	0	10	6	0	0	2	6	8	9	NA	BCL2/adenovirus E1B 19 kDa protein-interacting protein 3 OS=Mus musculus OX=10090 GN=Bnip3 PE=1 SV=1
E9Q1T9	Cse1l	0	0	1	3	0	0	0	6	2	4	NA	NA
E9QAX7	Cse1l	0	5	1	3	0	0	0	0	2	0	NA	NA
A0A0R4J1N9	Tfam	1	1	3	9	5	0	1	7	5	2	NA	Transcription factor A mitochondrial OS=Mus musculus OX=10090 GN=Tfam PE=1 SV=1
D3Z7M5	Nop16	10	9	0	6	10	0	0	0	2	0	NA	NA
Z4YJT3	Larp1	51	46	5	5	61	51	43	6	5	4	NA	La-related protein 1 OS=Mus musculus OX=10090 GN=Larp1 PE=1 SV=1
Q8BSN6	Vamp4	0	0	4	3	0	0	0	3	0	0	NA	NA
Q9D8S5	Srsf5	23	23	5	8	21	17	13	15	5	6	NA	MCG7614 isoform CRA_c OS=Mus musculus OX=10090 GN=Srsf5 PE=1 SV=1
Q9ESU7	Slc1a5	0	0	0	3	0	0	0	3	0	0	NA	NA
Q6NZD2	Snx1	3	2	1	5	2	3	0	1	2	1	NA	NA
Q6AXB7	Fmr1	22	15	1	5	24	24	27	0	4	1	NA	Fragile X mental retardation syndrome 1 homolog OS=Mus musculus OX=10090 GN=Fmr1 PE=1 SV=1
E9QAT0	Fmr1	22	15	1	5	24	24	27	1	4	1	NA	Synaptic functional regulator FMR1 OS=Mus musculus OX=10090 GN=Fmr1 PE=1 SV=1
Q792Z1	Try10	10	11	9	15	16	14	14	17	13	15	Oxidation (M)	MCG140784 OS=Mus musculus OX=10090 GN=Try10 PE=1 SV=1
S4R2K0	Pdf	1	0	0	5	0	0	0	6	6	7	NA	NA
A0A0J9YVG0	Ppm1g	6	3	2	5	5	5	3	5	3	0	NA	Protein phosphatase 1G OS=Mus musculus OX=10090 GN=Ppm1g PE=1 SV=1
A0A1B0GX25	Hdac6	2	1	11	3	2	1	0	2	11	0	NA	NA
A2APM2	Cd44	1	1	4	3	1	1	0	4	2	1	NA	NA
Q3U8S1	Cd44	1	1	4	3	1	1	1	4	2	1	NA	CD44 antigen OS=Mus musculus OX=10090 GN=Cd44 PE=1 SV=1
A2APM5	Cd44	1	1	4	3	1	1	0	4	2	1	NA	NA
A2APM3	Cd44	1	1	4	3	1	1	0	4	2	1	NA	NA
A2APM4	Cd44	1	1	4	3	1	1	0	4	2	1	NA	NA
E9QKM8	Cd44	1	1	4	3	1	1	0	4	2	1	NA	NA
Q80X37	Cd44	1	1	4	3	1	1	0	4	2	1	NA	NA
A2APM1	Cd44	1	1	4	3	1	1	0	4	2	1	NA	NA
F7AI87	Psmd4	19	18	6	4	20	24	22	4	3	6	Oxidation (M)	26S proteasome non-ATPase regulatory subunit 4 (Fragment) OS=Mus musculus OX=10090 GN=Psmd4 PE=1 SV=1
Q8R2K3	Ssbp1	5	0	5	6	0	2	0	6	5	0	NA	NA
E9QNU3	Dgcr2	0	0	3	3	0	0	0	0	2	3	NA	NA
Q8C2R4	Dgcr2	0	0	3	3	0	0	0	0	0	3	NA	NA
A0A0R4J1M6	Dgcr2	0	0	3	3	0	0	0	0	0	3	NA	NA
Q6P5A9	Dgcr2	0	0	3	3	0	0	0	0	0	3	NA	NA
E9Q548	Gm20518	0	0	3	3	0	0	0	1	0	3	NA	NA
A0A0G2JE26	Antxr2	0	0	2	3	0	0	0	0	3	4	NA	NA
J3QP71	Bsg	15	14	5	6	12	13	7	5	6	4	NA	Basigin (Fragment) OS=Mus musculus OX=10090 GN=Bsg PE=1 SV=1
Q50HX3	Rab14	5	4	6	5	7	5	5	10	4	8	NA	RAB14 protein variant OS=Mus musculus OX=10090 GN=Rab14 PE=1 SV=1
A2BE93	Set	0	0	7	4	0	0	0	3	12	16	NA	NA
A0A2R8VI79	Rbfox1	0	0	2	3	0	0	20	2	2	1	NA	RNA binding protein fox-1 homolog OS=Mus musculus OX=10090 GN=Rbfox1 PE=1 SV=1
A0A2R8VK79	Rbfox1	24	19	2	3	25	19	20	2	2	1	NA	RNA binding protein fox-1 homolog OS=Mus musculus OX=10090 GN=Rbfox1 PE=1 SV=1
Q3UGB5	Dazap1	5	4	0	6	9	5	13	0	5	5	Carbamidomethylation; Acetylation (Protein N-term)	DAZ associated protein 1 isoform CRA_b OS=Mus musculus OX=10090 GN=Dazap1 PE=1 SV=1
A0A0R4J0K4	Tm7sf3	0	1	5	7	0	0	0	4	3	15	Carbamidomethylation	NA
A2AJ26	Abca2	0	0	3	3	0	0	0	6	5	27	Carbamidomethylation; Oxidation (M)	NA
E9Q3V6	Septin2	0	1	8	6	0	2	5	6	10	2	NA	Septin-2 OS=Mus musculus OX=10090 GN=Sept2 PE=1 SV=1
A0A0J9YUS5	Eif4g1	18	7	0	6	0	15	2	4	0	0	NA	Eukaryotic translation initiation factor 4 gamma 1 OS=Mus musculus OX=10090 GN=Eif4g1 PE=1 SV=1
E9PVC6	Eif4g1	18	7	0	6	19	15	2	4	0	0	NA	Eukaryotic translation initiation factor 4 gamma 1 OS=Mus musculus OX=10090 GN=Eif4g1 PE=1 SV=1
E9Q9E1	Eif4g1	18	7	0	6	19	15	2	4	0	0	NA	Eukaryotic translation initiation factor 4 gamma 1 OS=Mus musculus OX=10090 GN=Eif4g1 PE=1 SV=1
E9PVC5	Eif4g1	18	7	0	6	19	15	2	4	0	0	NA	Eukaryotic translation initiation factor 4 gamma 1 OS=Mus musculus OX=10090 GN=Eif4g1 PE=1 SV=1
Q8JZN2	Csde1	14	0	5	6	15	11	0	10	4	5	Carbamidomethylation	NA
A0A0G2JF72	Csde1	0	0	0	6	0	0	0	0	4	0	NA	NA
A2AVJ7	Rrbp1	16	9	5	3	14	15	3	3	2	1	NA	Ribosome-binding protein 1 OS=Mus musculus OX=10090 GN=Rrbp1 PE=1 SV=1
A0A2I3BRC5	Adcy6	0	0	0	3	0	0	0	2	5	0	NA	NA
F8VQ52	Adcy6	0	0	0	3	0	0	0	2	5	5	NA	NA
G3UX26	Vdac2	8	11	5	7	9	12	2	9	4	8	NA	Voltage-dependent anion-selective channel protein 2 OS=Mus musculus OX=10090 GN=Vdac2 PE=1 SV=1
G3UXX3	Spr	1	1	4	2	0	0	5	0	3	8	Oxidation (M)	Sepiapterin reductase OS=Mus musculus OX=10090 GN=Spr PE=1 SV=1
Q91XH5	Spr	1	1	0	2	2	0	5	0	3	8	Oxidation (M)	Sepiapterin reductase OS=Mus musculus OX=10090 GN=Spr PE=1 SV=1
D3Z7Q8	Polr1c	0	0	3	6	0	0	0	0	0	2	NA	NA
A0A087WRM2	Itm2c	0	1	0	4	0	0	0	7	0	1	NA	NA
A2A6U3	Septin9	4	4	11	6	4	5	7	6	11	7	NA	Septin-9 OS=Mus musculus OX=10090 GN=Sept9 PE=1 SV=1
F8WHM0	Cd48	0	1	4	6	0	0	0	0	6	3	NA	NA
A0A286YEB7	Rps24	0	14	0	9	0	0	7	11	5	0	NA	40S ribosomal protein S24 OS=Mus musculus OX=10090 GN=Rps24 PE=1 SV=1
A0A0G2JFV9	Exosc9	2	2	2	3	3	0	0	2	4	0	NA	NA
F6YRW4	Kdm2a	2	0	3	3	0	0	0	2	0	0	NA	NA
A0A0D9SEG8	Adgre5	0	0	3	2	0	0	0	0	3	4	NA	NA
E9QMJ5	Adgre5	0	0	3	2	0	0	0	0	3	4	NA	NA
E9QJS7	Adgre5	0	0	3	2	0	0	0	0	3	4	NA	NA
Q9DC42	Adgre5	0	0	3	2	0	0	0	0	3	4	NA	NA
Q6ZWQ5	Snx12	0	0	6	5	0	0	0	5	6	0	NA	NA
Q3TGS7	Snx12	0	0	6	5	0	0	0	5	6	0	NA	NA
Q3V2H3	Snx12	0	0	6	5	0	0	0	5	6	0	NA	NA
G5E902	Slc25a3	0	10	4	7	10	10	6	11	5	0	NA	MCG10343 isoform CRA_b OS=Mus musculus OX=10090 GN=Slc25a3 PE=1 SV=1
A0A0R4J187	Xrcc6	16	5	2	3	8	4	1	3	4	0	NA	X-ray repair cross-complementing protein 6 OS=Mus musculus OX=10090 GN=Xrcc6 PE=1 SV=1
A0A2R8VHZ9	Xrcc6	0	0	2	3	0	0	0	3	4	0	NA	NA
A8XU21	Ncf4	0	0	1	6	0	0	0	0	0	0	NA	NA
E9PZ69	Tm9sf2	0	0	4	4	2	0	0	4	6	0	NA	NA
E9QKR0	Gnb2	0	0	0	5	3	0	0	7	0	13	Carbamidomethylation; Oxidation (M)	NA
E9Q1Y3	Apob	0	1	4	4	1	0	0	2	3	1	NA	NA
Q3UPZ0	Sema5a	0	0	2	3	0	0	0	0	3	0	NA	NA
E9PW39	Mov10	17	12	0	4	22	20	16	0	0	1	NA	Putative helicase MOV-10 OS=Mus musculus OX=10090 GN=Mov10 PE=1 SV=1
D3YVL0	Mov10	17	12	0	4	22	20	16	0	0	1	NA	Putative helicase MOV-10 OS=Mus musculus OX=10090 GN=Mov10 PE=1 SV=2
D3Z3E8	Mov10	17	12	0	4	22	20	16	0	0	1	NA	Putative helicase MOV-10 OS=Mus musculus OX=10090 GN=Mov10 PE=1 SV=1
Q91VE4	Ptger4	0	0	5	5	0	0	0	3	4	7	Oxidation (M)	NA
Q9CY46	Lsm4	13	9	9	9	8	8	0	3	5	0	NA	NA
D3YTP8	Lsm4	13	9	9	9	8	8	0	3	5	0	NA	NA
Q5SVX2	Ddx56	0	0	2	3	0	0	0	2	2	1	NA	NA
Q8C4F9	Rnf13	0	0	1	4	0	0	0	4	4	0	NA	NA
Q8CB78	Rnf13	0	0	1	4	0	0	0	4	0	0	NA	NA
Q3UDS7	Adpgk	2	0	0	3	0	0	0	0	3	0	NA	NA
A0A1L1SSF2	Adpgk	2	0	0	3	0	0	0	0	3	0	NA	NA
A0A494B9D7	Naa40	4	3	3	3	2	3	4	6	5	4	Carbamidomethylation	N-alpha-acetyltransferase 40 OS=Mus musculus OX=10090 GN=Naa40 PE=1 SV=1
F6TFN2	Lmo7	43	40	0	4	31	32	25	0	0	0	NA	LIM domain only 7 (Fragment) OS=Mus musculus OX=10090 GN=Lmo7 PE=1 SV=1
Q3TA68	Wdr36	2	1	0	4	3	1	2	3	7	2	NA	WD repeat domain 36 OS=Mus musculus OX=10090 GN=Wdr36 PE=1 SV=1
Q3TAQ9	Wdr36	2	1	0	4	3	1	2	3	7	2	NA	WD repeat domain 36 OS=Mus musculus OX=10090 GN=Wdr36 PE=1 SV=1
A0A0N4SVQ1	Ndufa4	1	3	2	4	4	2	0	3	1	0	NA	NA
E9PW43	NA	0	0	4	3	1	2	0	3	2	0	NA	NA
G3X9V0	Psme2	2	0	0	2	0	0	0	3	2	0	NA	NA
S4R1W5	Rbm6	62	56	3	4	73	55	55	7	5	4	NA	RNA-binding motif protein 6 OS=Mus musculus OX=10090 GN=Rbm6 PE=1 SV=1
F8WH95	Laptm5	0	0	0	11	0	0	0	0	0	0	NA	NA
F6QKD2	Ddx47	3	2	1	3	4	3	1	0	2	0	NA	Probable ATP-dependent RNA helicase DDX47 (Fragment) OS=Mus musculus OX=10090 GN=Ddx47 PE=1 SV=1
A0A0N4SVT1	Ddx47	3	2	1	3	4	3	1	0	2	0	NA	Probable ATP-dependent RNA helicase DDX47 (Fragment) OS=Mus musculus OX=10090 GN=Ddx47 PE=1 SV=1
A2A464	Slc9a8	0	0	3	5	0	0	0	2	4	1	NA	NA
Q3TPJ8	Dync1i2	8	0	2	2	8	0	6	0	0	0	NA	Cytoplasmic dynein 1 intermediate chain 2 OS=Mus musculus OX=10090 GN=Dync1i2 PE=1 SV=1
A2BFF9	Dync1i2	8	0	0	2	8	0	6	0	0	0	NA	Cytoplasmic dynein 1 intermediate chain 2 OS=Mus musculus OX=10090 GN=Dync1i2 PE=1 SV=1
E9QLR3	Laptm4a	0	0	9	7	0	0	0	10	12	1	NA	NA
A0A1L1SRJ4	Tspan3	0	0	3	5	0	0	0	3	0	5	NA	NA
A0A0G2JER9	Dnajb6	3	1	2	4	2	0	0	0	0	5	NA	NA
G3X8S5	Dnajb6	3	1	2	4	2	0	0	0	3	0	NA	NA
G8JL74	Ptbp3	7	6	6	5	5	5	7	6	4	3	Oxidation (M)	Polypyrimidine tract-binding protein 3 OS=Mus musculus OX=10090 GN=Ptbp3 PE=1 SV=1
G3UXA6	Ptbp3	7	6	6	5	5	5	7	6	4	3	Oxidation (M)	Polypyrimidine tract-binding protein 3 OS=Mus musculus OX=10090 GN=Ptbp3 PE=1 SV=1
A2AMY5	Ubap2	9	0	0	3	0	7	6	3	0	0	NA	Ubiquitin-associated protein 2 OS=Mus musculus OX=10090 GN=Ubap2 PE=1 SV=1
A0A0J9YTY0	Septin11	5	0	7	4	0	0	0	0	7	4	NA	NA
A0A0J9YUL3	Septin11	5	0	7	4	0	0	0	0	7	4	NA	NA
A2A815	Park7	0	0	0	4	0	0	3	1	2	0	NA	Protein/nucleic acid deglycase DJ-1 (Fragment) OS=Mus musculus OX=10090 GN=Park7 PE=1 SV=8
A2A813	Park7	0	0	0	4	2	0	3	1	2	0	NA	Protein/nucleic acid deglycase DJ-1 OS=Mus musculus OX=10090 GN=Park7 PE=1 SV=1
A0A338P6P6	Acap2	23	14	0	3	23	22	14	1	3	4	NA	Arf-GAP with coiled-coil ANK repeat and PH domain-containing protein 2 OS=Mus musculus OX=10090 GN=Acap2 PE=1 SV=1
Q5JC28	Eps15	0	0	0	2	6	3	1	1	0	0	NA	Epidermal growth factor receptor pathway substrate 15 isoform B OS=Mus musculus OX=10090 GN=Eps15 PE=1 SV=1
H3BK65	Eps15	0	0	0	2	6	3	1	1	0	0	NA	Epidermal growth factor receptor substrate 15 OS=Mus musculus OX=10090 GN=Eps15 PE=1 SV=1
A0A0G2JEA9	Rbm8a	0	0	0	2	0	1	0	0	0	0	NA	NA
Q80X98	Dhx38	32	31	2	4	27	21	4	2	2	4	NA	DEAH (Asp-Glu-Ala-His) box polypeptide 38 OS=Mus musculus OX=10090 GN=Dhx38 PE=1 SV=1
A2AE27	Ampd2	0	2	2	6	0	1	4	5	0	0	NA	AMP deaminase OS=Mus musculus OX=10090 GN=Ampd2 PE=1 SV=1
A8DIL0	Lgals8	0	0	2	3	0	0	0	3	5	7	Carbamidomethylation	NA
A0A140LJ59	Eif3k	0	0	0	4	0	0	0	2	2	0	NA	NA
A0A1Y7VIT3	Rasef	0	0	0	4	0	0	0	0	0	0	NA	NA
E9Q4Q2	Sf1	0	0	4	4	0	0	13	4	6	3	Acetylation (Protein N-term)	Splicing factor 1 OS=Mus musculus OX=10090 GN=Sf1 PE=1 SV=1
D3YZC9	Sf1	17	13	4	4	16	12	13	4	6	3	Acetylation (Protein N-term)	Splicing factor 1 OS=Mus musculus OX=10090 GN=Sf1 PE=1 SV=1
D3YZD0	Sf1	0	0	4	4	0	0	13	4	6	3	Acetylation (Protein N-term)	Splicing factor 1 OS=Mus musculus OX=10090 GN=Sf1 PE=1 SV=1
D3YVH4	Sf1	0	0	0	4	0	0	0	0	0	0	NA	NA
E9Q6U4	Pfdn4	3	3	0	2	0	0	0	0	0	0	NA	NA
Q3UWL8	Pfdn4	3	3	0	2	0	0	0	0	0	0	NA	NA
Q31093	H2-M3	0	0	1	3	0	0	0	4	1	1	NA	NA
Q6NV52	Tacc3	0	1	0	2	3	0	2	0	0	0	NA	Transforming acidic coiled-coil-containing protein 3 OS=Mus musculus OX=10090 GN=Tacc3 PE=1 SV=1
Q99LH8	Tacc3	0	1	2	2	3	1	0	2	0	0	NA	NA
A0A2R8VHK1	Cyc1	0	8	0	6	0	5	0	8	3	0	NA	NA
D3YZ09	Gar1	23	20	5	3	24	21	13	3	4	4	NA	H/ACA ribonucleoprotein complex subunit (Fragment) OS=Mus musculus OX=10090 GN=Gar1 PE=1 SV=1
H3BJ30	Cpsf6	10	9	1	3	5	5	6	2	0	3	NA	Cleavage and polyadenylation-specificity factor subunit 6 OS=Mus musculus OX=10090 GN=Cpsf6 PE=1 SV=1
H3BJW3	Cpsf6	10	9	1	3	5	5	6	2	0	3	NA	Cleavage and polyadenylation-specificity factor subunit 6 OS=Mus musculus OX=10090 GN=Cpsf6 PE=1 SV=1
Q3UBW1	Spryd7	0	0	2	2	0	0	0	0	0	0	NA	NA
A0A0A6YVU8	Adrm1b	7	7	0	6	10	11	0	5	0	0	NA	NA
Q8CIH9	Ppat	4	4	3	3	4	2	11	0	4	13	NA	Amidophosphoribosyltransferase OS=Mus musculus OX=10090 GN=Ppat PE=1 SV=1
A0A0R4J247	Sla	0	0	2	3	0	0	4	2	6	6	Carbamidomethylation	Src-like adaptor isoform CRA_a OS=Mus musculus OX=10090 GN=Sla PE=1 SV=1
E9Q5B5	Hk2	5	6	1	2	7	5	0	0	3	0	NA	NA
E9Q8Y1	Dek	0	0	0	3	0	2	0	0	0	1	NA	NA
D3YVJ6	Dek	0	0	0	3	0	2	0	0	0	1	NA	NA
A0A0R4J140	Cluh	10	5	4	4	7	5	5	3	2	1	NA	Clustered mitochondria protein homolog OS=Mus musculus OX=10090 GN=Cluh PE=1 SV=1
E0CYQ2	Nudcd2	7	5	0	5	0	4	0	2	2	0	NA	NA
A2AT02	Nsfl1c	0	0	0	2	0	0	0	0	0	3	NA	NA
D3YWF6	Otub1	0	3	0	4	4	0	6	0	0	3	NA	Ubiquitin thioesterase OTUB1 OS=Mus musculus OX=10090 GN=Otub1 PE=1 SV=1
Q3UZG4	Aimp1	12	12	0	4	15	11	14	3	0	0	NA	Aminoacyl tRNA synthase complex-interacting multifunctional protein 1 OS=Mus musculus OX=10090 GN=Aimp1 PE=1 SV=1
A0A0G2JEA0	Ankib1	0	0	0	4	0	0	0	0	0	0	NA	NA
F8WIS0	Ccr9	0	0	0	2	0	0	0	4	6	0	NA	NA
A0A3B2WCL5	Ranbp3	0	0	3	2	0	0	1	2	3	0	NA	RAN binding protein 3 isoform CRA_i OS=Mus musculus OX=10090 GN=Ranbp3 PE=1 SV=1
F8WJ30	Pfdn2	0	0	0	1	0	0	0	1	1	0	NA	NA
Q3UNN4	Smarcc1	22	16	0	3	23	24	5	0	1	2	Acetylation (Protein N-term)	SWI/SNF complex subunit SMARCC1 OS=Mus musculus OX=10090 GN=Smarcc1 PE=1 SV=1
A0A494BBJ8	Fermt3	1	0	0	3	1	0	1	1	0	0	NA	Fermitin family homolog 3 OS=Mus musculus OX=10090 GN=Fermt3 PE=1 SV=1
A0A494B9W3	Fermt3	1	0	0	3	1	0	1	1	1	0	NA	Fermitin family homolog 3 OS=Mus musculus OX=10090 GN=Fermt3 PE=1 SV=1
A0A0U1RPL0	Atxn2l	15	18	1	3	17	11	7	0	0	0	NA	Ataxin-2-like protein OS=Mus musculus OX=10090 GN=Atxn2l PE=1 SV=1
Q3TGG2	Atxn2l	13	17	0	3	0	11	8	0	1	1	NA	Ataxin-2-like protein OS=Mus musculus OX=10090 GN=Atxn2l PE=1 SV=1
E9Q5Q0	Atxn2l	0	0	0	3	0	0	0	0	0	0	NA	NA
B2RRI5	Lrig2	0	0	1	3	0	0	0	2	1	0	NA	NA
E9Q9F5	Septin7	5	1	9	4	0	1	5	3	10	4	NA	Septin-7 OS=Mus musculus OX=10090 GN=Sept7 PE=1 SV=2
E9Q1G8	Septin7	5	1	9	4	0	1	5	3	10	4	NA	Septin-7 OS=Mus musculus OX=10090 GN=Sept7 PE=1 SV=2
G3X920	Armc8	14	12	0	2	16	12	15	0	0	0	NA	Armadillo repeat containing 8 isoform CRA_b OS=Mus musculus OX=10090 GN=Armc8 PE=1 SV=1
D3Z0M9	Ddx23	20	16	1	4	17	14	7	3	3	1	NA	DEAD (Asp-Glu-Ala-Asp) box polypeptide 23 OS=Mus musculus OX=10090 GN=Ddx23 PE=1 SV=1
B2RPU8	Zbed5	1	0	2	1	1	0	0	2	3	0	NA	NA
Q8BVQ0	Skic8	2	0	1	2	0	0	0	0	0	0	NA	NA
A2AS05	Helz2	0	0	1	4	3	0	0	3	6	0	NA	NA
A2AS03	Helz2	0	0	1	4	3	0	0	3	6	2	Carbamidomethylation	NA
A2A5R8	Stau1	4	6	0	2	0	0	3	0	0	0	NA	Double-stranded RNA-binding protein Staufen homolog 1 OS=Mus musculus OX=10090 GN=Stau1 PE=1 SV=1
Q9DBE7	Stau1	0	6	0	2	0	0	3	0	3	0	NA	Double-stranded RNA-binding protein Staufen homolog 1 OS=Mus musculus OX=10090 GN=Stau1 PE=1 SV=1
A2A5S3	Stau1	0	0	0	2	6	3	3	0	0	0	NA	Double-stranded RNA-binding protein Staufen homolog 1 OS=Mus musculus OX=10090 GN=Stau1 PE=1 SV=1
Q8VHM7	Il10rb	0	0	1	3	0	0	0	0	0	4	NA	NA
G3UXI2	Tmem127	0	0	2	2	0	0	0	5	4	4	Acetylation (Protein N-term); Oxidation (M)	NA
Q8MHR8	Klra1	3	0	0	2	0	0	0	1	3	2	Acetylation (Protein N-term)	NA
F6TVX7	NA	0	2	0	2	2	2	2	0	0	2	NA	Predicted gene 20671 (Fragment) OS=Mus musculus OX=10090 GN=Gm20671 PE=3 SV=1
F7C386	Pisd	3	0	0	2	2	2	2	0	0	2	NA	Phosphatidylserine decarboxylase proenzyme mitochondrial (Fragment) OS=Mus musculus OX=10090 GN=Pisd PE=4 SV=1
E9PX91	Pisd	0	0	0	2	2	0	2	0	0	2	NA	Phosphatidylserine decarboxylase proenzyme mitochondrial OS=Mus musculus OX=10090 GN=Pisd PE=3 SV=1
E9PUY1	Mrps12	4	3	0	3	3	3	0	1	2	0	NA	NA
Q9D4G5	Pop1	17	16	0	4	10	12	14	0	0	1	NA	Processing of precursor 1 ribonuclease P/MRP family (S. cerevisiae) OS=Mus musculus OX=10090 GN=Pop1 PE=1 SV=1
Q8K205	Pop1	17	0	0	4	0	12	14	0	0	1	NA	Processing of 1 ribonuclease P/MRP family (S. cerevisiae) OS=Mus musculus OX=10090 GN=Pop1 PE=1 SV=1
D6RHN2	Selenbp1	0	0	2	2	0	0	0	0	0	0	NA	NA
A0A0R4J135	Selenbp2	0	0	0	2	0	0	0	0	0	0	NA	NA
G3UWK0	Selenbp2	0	0	0	2	0	0	0	0	0	0	NA	NA
A0A494BB49	Cd5	1	0	1	3	0	0	0	0	2	5	Carbamidomethylation	NA
A0A1D5RML8	Polr2c	0	4	1	1	1	0	3	0	0	1	NA	DNA-directed RNA polymerase II subunit RPB3 OS=Mus musculus OX=10090 GN=Polr2c PE=1 SV=1
A0A1D5RLM9	Polr2c	0	0	0	1	0	0	0	0	0	0	NA	NA
A0A338P7E5	Ube2l3	0	0	0	2	0	0	0	0	2	0	NA	NA
A0A0R4J0N5	Pdcd2	0	0	6	3	5	0	0	4	4	2	NA	NA
Q6PD20	Mccc2	0	0	0	2	0	0	0	0	2	0	NA	NA
A0A0M3HEP7	Atp8a1	0	0	0	3	0	0	0	4	0	5	NA	NA
G5E852	Jak2	0	0	0	4	0	0	0	0	0	4	NA	NA
F7AAP4	Atp2b4	0	0	0	2	0	0	0	0	0	4	NA	NA
E9Q828	Atp2b4	0	0	0	2	0	0	0	0	0	4	NA	NA
Q8C048	Atp2b3	0	0	0	2	0	0	0	0	0	0	NA	NA
A2ALL9	Atp2b3	0	0	0	2	0	0	0	0	0	0	NA	NA
Q0VF55	Atp2b3	0	0	0	2	0	0	0	0	0	0	NA	NA
Q91Z78	Bnip3l	0	0	3	2	0	0	0	2	3	4	NA	NA
F6QYF8	Npepps	5	3	0	3	8	0	0	4	2	0	NA	NA
A2AV19	Exosc2	0	7	0	2	8	6	8	0	1	0	NA	Exosome complex component RRP4 (Fragment) OS=Mus musculus OX=10090 GN=Exosc2 PE=1 SV=1
H7BWX5	Abtb3	0	0	2	2	0	2	0	2	2	0	NA	NA
A0A0R4J1J1	Pnkd	1	1	0	1	2	0	0	0	0	0	NA	NA
Q9D1M1	Polr1d	3	2	0	2	3	1	0	1	0	0	NA	NA
A0A0J9YUH6	Polr1d	0	2	0	2	0	0	0	0	0	0	NA	NA
A0A0J9YV27	Polr1d	0	2	0	2	0	0	0	0	0	0	NA	NA
A0A0N4SVL9	Ppp6c	4	3	1	3	0	0	5	3	0	0	NA	Serine/threonine-protein phosphatase OS=Mus musculus OX=10090 GN=Ppp6c PE=1 SV=1
D3Z5W0	Atp6ap1l	0	0	0	1	0	0	0	1	1	0	NA	NA
E0CX52	Clec2i	0	0	2	1	0	0	0	1	0	0	NA	NA
B7FAV1	Flna	0	14	1	2	24	0	6	1	1	5	NA	Filamin alpha (Fragment) OS=Mus musculus OX=10090 GN=Flna PE=1 SV=1
B7FAU9	Flna	16	14	1	2	24	27	6	1	1	5	NA	Filamin alpha OS=Mus musculus OX=10090 GN=Flna PE=1 SV=1
Q05BZ0	Golph3	3	6	3	10	12	5	0	9	3	0	NA	NA
A0A0G2JGL0	Ube2d3	1	0	0	3	1	0	0	4	0	0	NA	NA
G3UYU4	Flot1	0	0	0	2	0	0	0	0	2	12	Carbamidomethylation	NA
G3UY29	Rab11b	1	2	0	2	1	1	2	1	1	7	Acetylation (Protein N-term)	MCG22989 isoform CRA_a OS=Mus musculus OX=10090 GN=Rab11b PE=4 SV=1
E9Q3P9	Rab11a	1	2	0	2	1	1	2	1	1	7	Acetylation (Protein N-term)	Ras-related protein Rab-11A OS=Mus musculus OX=10090 GN=Rab11a PE=4 SV=1
F8WGS1	Rab11a	1	2	0	2	1	1	2	1	1	7	Acetylation (Protein N-term)	Ras-related protein Rab-11A (Fragment) OS=Mus musculus OX=10090 GN=Rab11a PE=4 SV=1
J3QN19	Prim1	0	0	0	3	0	0	0	0	0	0	NA	NA
Q8C3J2	St6galnac4	1	0	0	1	0	0	0	1	1	0	NA	NA
Q9D881	Cox5b-ps	5	6	0	3	0	8	0	1	0	0	NA	NA
E9PYK0	Unc93b1	0	0	2	2	0	0	0	0	0	2	Carbamidomethylation	NA
Q3UEW6	Flt3	0	0	1	2	0	1	0	2	3	7	Carbamidomethylation	NA
A0A087WQH8	Slc35a4	0	0	2	2	0	0	0	6	2	0	NA	NA
A0A0G2JDL9	Rap1a	0	0	1	3	2	0	0	5	1	0	NA	NA
A0A0G2JE52	Rap1a	0	0	1	3	0	0	0	0	1	0	NA	NA
A0A3Q4EH93	Nubp2	0	0	0	1	0	0	0	0	1	0	NA	NA
A0A3Q4L2S1	Nubp2	0	0	0	1	0	0	0	0	1	0	NA	NA
Q5RL20	Mrpl43	3	0	1	2	2	0	0	0	1	0	NA	NA
E9Q9A5	Pnkp	0	0	0	2	0	0	0	3	0	0	NA	NA
G5E8N7	Pnkp	0	0	0	2	0	0	0	3	0	0	NA	NA
D3Z1V4	Pebp1	0	0	0	1	0	0	0	0	0	2	NA	NA
D6RHS6	Pebp1	0	0	0	1	2	0	0	0	0	2	NA	NA
A0A0U1RNX8	Bcl7c	2	4	0	2	2	0	0	0	0	0	NA	NA
Q8C0M5	Susd6	0	0	2	1	0	0	0	2	2	2	NA	NA
Z4YJH1	Cetn2	6	0	0	3	0	1	0	0	0	0	NA	NA
E0CY84	Arrdc3	0	0	0	1	0	0	0	0	0	1	NA	NA
G3X8T2	Zc3h18	20	14	0	4	13	13	15	1	0	2	NA	RIKEN cDNA 5830416A07 isoform CRA_c OS=Mus musculus OX=10090 GN=Zc3h18 PE=1 SV=1
H3BIW0	Zc3h18	0	14	0	4	0	0	15	1	0	2	NA	Zinc finger CCCH domain-containing protein 18 OS=Mus musculus OX=10090 GN=Zc3h18 PE=1 SV=1
Q3TF45	Clcn3	0	0	0	2	0	0	0	3	0	3	Acetylation (Protein N-term); Oxidation (M)	NA
A0A1L1STE6	Idh3a	4	3	1	2	2	4	0	2	2	1	NA	NA
K4DI65	Cirbp	0	0	1	2	3	0	0	0	0	0	NA	NA
D3YU80	Cirbp	0	0	1	2	3	0	0	0	0	0	NA	NA
A0A2R8VHH1	Nup155	6	6	2	2	7	7	2	3	3	0	NA	Nuclear pore complex protein Nup155 OS=Mus musculus OX=10090 GN=Nup155 PE=1 SV=1
Q3UC82	Lig3	18	9	0	2	4	2	2	0	0	0	NA	DNA ligase OS=Mus musculus OX=10090 GN=Lig3 PE=1 SV=1
Q80ZH7	Lig3	18	9	0	2	4	2	2	0	0	0	NA	DNA ligase OS=Mus musculus OX=10090 GN=Lig3 PE=1 SV=1
K4DI59	Lig3	18	9	0	2	4	2	2	0	0	0	NA	DNA ligase OS=Mus musculus OX=10090 GN=Lig3 PE=1 SV=1
F8VQC1	Srp72	3	3	0	1	0	3	1	0	1	0	NA	Signal recognition particle subunit SRP72 OS=Mus musculus OX=10090 GN=Srp72 PE=1 SV=1
A0A0R4J0K1	Selenof	11	7	0	2	9	6	0	0	1	0	NA	NA
A0A0R4J0P6	Parn	1	1	0	2	1	0	0	0	0	0	NA	NA
Q3U422	Ndufv3	0	0	0	2	0	1	0	0	0	0	NA	NA
E9QM77	Atxn2	4	8	0	2	11	6	8	1	1	1	NA	Ataxin-2 OS=Mus musculus OX=10090 GN=Atxn2 PE=1 SV=1
D3YX34	Dctn1	7	7	2	2	9	11	2	0	0	0	NA	Dynactin subunit 1 OS=Mus musculus OX=10090 GN=Dctn1 PE=1 SV=1
E9Q586	Dctn1	7	7	2	2	9	11	2	2	1	0	NA	Dynactin subunit 1 OS=Mus musculus OX=10090 GN=Dctn1 PE=1 SV=1
E9Q3M3	Dctn1	7	7	2	2	9	11	2	2	1	0	NA	Dynactin subunit 1 OS=Mus musculus OX=10090 GN=Dctn1 PE=1 SV=1
A0A1L1SRC3	Rbm7	0	0	0	2	0	2	1	0	0	0	NA	RNA-binding protein 7 OS=Mus musculus OX=10090 GN=Rbm7 PE=1 SV=1
A0A338P6E7	Nrros	0	0	0	2	0	0	0	2	0	0	NA	NA
S4R1S2	Ank3	0	0	0	1	0	0	0	2	0	0	NA	NA
S4R2S8	Ank3	0	0	0	1	0	0	0	2	0	0	NA	NA
A0A1W2P812	Ank3	0	0	0	1	0	0	0	2	0	0	NA	NA
G5E8K2	Ank3	0	0	0	1	0	0	0	2	0	0	NA	NA
G5E8K3	Ank3	0	0	0	1	0	0	0	2	0	0	NA	NA
S4R2K9	Ank3	0	0	0	1	0	0	0	2	0	0	NA	NA
Q3UVY0	Ank3	0	0	0	1	0	0	0	0	0	0	NA	NA
S4R229	Ank3	0	0	0	1	0	0	0	0	0	0	NA	NA
W4VSQ0	Ank3	0	0	0	1	0	0	0	0	0	0	NA	NA
F6TQL3	Dnajc8	0	0	0	2	0	0	0	0	0	0	NA	NA
A2ALF0	Dnajc8	0	0	0	2	0	6	1	0	8	2	NA	DnaJ homolog subfamily C member 8 OS=Mus musculus OX=10090 GN=Dnajc8 PE=1 SV=1
A2ALF3	Dnajc8	0	0	0	2	0	6	1	10	8	2	NA	DnaJ homolog subfamily C member 8 OS=Mus musculus OX=10090 GN=Dnajc8 PE=1 SV=1
Q3TKD0	Tnpo1	0	2	1	1	0	0	0	0	1	3	NA	NA
A1L3S7	Gatad2b	9	8	0	1	8	5	1	0	0	1	NA	Gatad2b protein OS=Mus musculus OX=10090 GN=Gatad2b PE=1 SV=1
Q9D9P1	Chchd3	0	11	0	2	0	0	0	0	3	2	NA	NA
A0A0A6YX02	Lamtor1	0	0	1	1	0	0	0	0	1	0	NA	NA
Q9CPS5	Psmd8	9	5	1	2	10	7	9	3	5	4	NA	26S proteasome non-ATPase regulatory subunit 8 OS=Mus musculus OX=10090 GN=Psmd8 PE=1 SV=2
F6V084	Tmx1	0	0	1	1	0	0	0	1	1	0	NA	NA
A0A0R4J0U2	Ppp4r2	0	6	1	2	8	5	7	0	0	0	NA	Serine/threonine-protein phosphatase 4 regulatory subunit 2 OS=Mus musculus OX=10090 GN=Ppp4r2 PE=1 SV=1
D3Z7P2	Tmem109	0	0	0	2	0	0	0	2	0	0	NA	NA
D3Z3Z2	Tmem109	0	0	0	2	0	0	0	2	0	0	NA	NA
D3YX08	Tmem109	0	0	0	2	0	0	0	2	0	0	NA	NA
D3Z0I8	Tmem109	0	0	0	2	0	0	0	2	0	0	NA	NA
G3UYG5	Kcnq5	0	0	0	2	0	0	0	1	0	6	NA	NA
G3UYP4	Kcnq5	0	0	0	2	0	0	0	1	0	6	NA	NA
E9Q9F1	Kcnq5	0	0	0	2	0	0	0	1	0	6	NA	NA
G3UZ84	Kcnq5	0	0	0	2	0	0	0	1	0	0	NA	NA
A0A0N5E9G7	Rfc1	11	7	0	1	7	6	9	2	1	2	Carbamidomethylation	Replication factor C subunit 1 OS=Mus musculus OX=10090 GN=Rfc1 PE=1 SV=1
G3X8Z6	Rfc1	11	7	0	1	7	6	9	2	1	2	Carbamidomethylation	Replication factor C subunit 1 OS=Mus musculus OX=10090 GN=Rfc1 PE=1 SV=1
Q5U4B1	Rfc1	11	7	0	1	7	6	9	2	0	2	Carbamidomethylation	Replication factor C subunit 1 OS=Mus musculus OX=10090 GN=Rfc1 PE=1 SV=1
G3UWX1	Rfc1	11	7	0	1	7	6	9	2	1	2	Carbamidomethylation	Replication factor C subunit 1 OS=Mus musculus OX=10090 GN=Rfc1 PE=1 SV=2
Q5SU72	Trim25	5	1	0	1	0	3	3	1	0	0	NA	E3 ubiquitin/ISG15 ligase TRIM25 OS=Mus musculus OX=10090 GN=Trim25 PE=1 SV=1
Q5SU71	Trim25	5	1	0	1	0	3	3	1	0	0	NA	E3 ubiquitin/ISG15 ligase TRIM25 OS=Mus musculus OX=10090 GN=Trim25 PE=1 SV=1
B1AV14	Apool	0	0	0	1	0	0	0	0	0	0	NA	NA
Q9CZM3	Tmem33	0	0	1	1	0	0	0	1	1	0	NA	NA
A0A0R4J1Z3	Tmem33	0	0	1	1	3	0	0	1	1	0	NA	NA
Q8BTY5	Psmb5	0	0	0	2	0	0	0	0	0	0	NA	NA
E9PYD5	Tcea1	3	0	2	2	0	1	4	3	0	3	Carbamidomethylation	Transcription elongation factor A protein 1 OS=Mus musculus OX=10090 GN=Tcea1 PE=1 SV=1
B0R1E3	Hint1	0	0	0	1	0	0	0	0	0	0	NA	NA
A0A0A0MQF5	Otud6b	0	1	1	1	0	0	1	1	0	1	NA	Deubiquitinase OTUD6B OS=Mus musculus OX=10090 GN=Otud6b PE=1 SV=1
D3YV67	Tmem165	0	0	0	2	0	1	0	0	1	0	NA	NA
A0A0R4J0V5	Polr2a	8	6	0	2	6	11	1	0	0	0	NA	DNA-directed RNA polymerase subunit OS=Mus musculus OX=10090 GN=Polr2a PE=1 SV=1
F6VYQ6	Exosc10	0	0	0	1	8	0	0	0	0	0	NA	NA
Q8K366	Exosc10	10	5	0	1	8	7	8	0	0	0	NA	Exosc10 protein OS=Mus musculus OX=10090 GN=Exosc10 PE=1 SV=1
E9Q1S3	Sec23a	0	0	0	1	0	0	0	0	2	0	NA	NA
A0A0G2JGQ4	Nub1	0	0	0	1	0	0	1	0	0	0	NA	NEDD8 ultimate buster 1 OS=Mus musculus OX=10090 GN=Nub1 PE=1 SV=1
E9PYI8	Usp14	6	3	0	2	3	2	1	4	0	0	NA	Ubiquitin carboxyl-terminal hydrolase OS=Mus musculus OX=10090 GN=Usp14 PE=1 SV=1
E9Q481	Ppp4r3a	6	3	1	2	5	5	5	0	0	0	NA	Serine/threonine-protein phosphatase 4 regulatory subunit 3A OS=Mus musculus OX=10090 GN=Ppp4r3a PE=1 SV=1
B0QZH9	Phf23	0	0	0	1	0	0	0	0	0	0	NA	NA
Q8VHA8	Ss18	1	0	0	1	1	1	2	0	0	0	NA	Protein SSXT OS=Mus musculus OX=10090 GN=Ss18 PE=1 SV=1
Q8BKL1	Ss18	1	0	0	1	1	1	2	0	0	0	NA	Protein SSXT OS=Mus musculus OX=10090 GN=Ss18 PE=1 SV=1
Q8BJJ6	Ss18	1	1	0	1	1	1	2	0	0	0	NA	Protein SSXT OS=Mus musculus OX=10090 GN=Ss18 PE=1 SV=1
F6RPJ9	Ide	1	0	1	1	1	0	0	0	1	4	NA	NA
A0A498WFS2	Ubxn1	0	1	0	2	0	0	7	0	0	5	NA	UBX domain-containing protein 1 OS=Mus musculus OX=10090 GN=Ubxn1 PE=4 SV=1
G5E8V8	Phax	7	10	0	1	8	8	13	0	1	0	NA	Phosphorylated adapter RNA export protein OS=Mus musculus OX=10090 GN=Phax PE=1 SV=1
D3YVV1	Tmem30a	0	0	0	2	0	0	0	0	3	0	NA	NA
A2ABZ2	Pycr1	0	0	0	1	0	0	0	0	1	0	NA	NA
A0A494BBD8	Anxa1	5	0	6	1	8	2	12	0	2	7	NA	Annexin OS=Mus musculus OX=10090 GN=Anxa1 PE=1 SV=1
E0CX99	Nwd1	0	0	0	2	0	0	0	1	0	4	NA	NA
A0A2I3BR96	Nwd1	0	0	0	2	0	0	0	1	0	4	NA	NA
A0A0R4J293	Tgm1	2	0	1	1	1	1	0	1	1	7	NA	NA
A0A286YD19	Selenok	0	0	1	1	0	0	0	0	0	0	NA	NA
D3Z0S0	Cops7a	0	0	0	1	0	2	0	0	0	0	NA	NA
D3YVI6	Cops7a	2	1	0	1	0	2	0	0	0	0	NA	NA
D3Z440	Cops7a	2	0	0	1	0	2	0	0	0	0	NA	NA
Q8CFZ0	Ube2i	3	0	3	2	2	2	0	0	3	0	NA	NA
G3UYP0	Ube2i	3	0	3	2	2	2	0	0	3	0	NA	NA
A0A0R4J0B4	Cmas	0	0	0	1	0	2	0	0	0	0	NA	NA
E9Q9E8	Cd84	0	0	2	3	0	0	0	2	2	0	NA	NA
A0A0R4J0K5	Cd84	0	0	2	3	0	0	0	2	2	4	NA	NA
D3YTQ9	Rps15	15	8	2	4	19	13	0	2	0	0	NA	NA
A0A0N4SUH4	Pum3	0	0	1	1	0	0	1	0	0	0	NA	Pumilio homolog 3 OS=Mus musculus OX=10090 GN=Pum3 PE=1 SV=1
A0A494BBI7	Pum3	0	0	1	1	0	0	1	0	0	0	NA	Pumilio homolog 3 (Fragment) OS=Mus musculus OX=10090 GN=Pum3 PE=1 SV=1
A0A494BB98	Pum3	4	0	1	1	0	1	0	0	0	0	NA	NA
A0A0R4J1I3	Men1	0	0	0	1	2	1	0	1	2	0	NA	NA
D3YYT1	Glyr1	9	7	0	1	15	10	7	1	0	0	NA	Putative oxidoreductase GLYR1 OS=Mus musculus OX=10090 GN=Glyr1 PE=1 SV=1
Q4VBF8	Sipa1l1	0	0	0	1	0	0	0	0	0	0	NA	NA
Q3UDM0	Mob1b	3	3	1	1	4	3	0	0	2	1	NA	NA
F2Z3X3	Cuedc1	0	0	0	1	0	0	0	0	0	0	NA	NA
E9Q242	Adsl	2	1	1	1	0	0	0	1	1	3	NA	NA
A0A140LHU1	Adsl	0	0	0	1	0	0	0	1	1	0	NA	NA
E9Q3T7	Adsl	0	0	0	1	0	0	5	1	1	0	NA	Adenylosuccinate lyase OS=Mus musculus OX=10090 GN=Adsl PE=1 SV=1
A2ALA0	Surf6	2	1	0	1	1	0	1	0	0	0	NA	Surfeit locus protein 6 OS=Mus musculus OX=10090 GN=Surf6 PE=1 SV=1
G3UXZ5	Psme1	3	0	0	2	0	0	0	0	0	0	NA	NA
G3UWN9	Psme1	0	0	0	2	0	0	0	0	0	0	NA	NA
Q3U5V8	Stx11	0	0	0	2	0	0	0	2	4	4	NA	NA
D3Z0Y2	Prdx6	2	1	0	2	3	1	1	0	0	3	Carbamidomethylation	Peroxiredoxin-6 OS=Mus musculus OX=10090 GN=Prdx6 PE=1 SV=1
H3BKT5	Ahcyl2	3	0	0	2	2	2	0	3	2	0	NA	NA
F7DF36	Sidt2	0	0	0	1	0	0	0	0	0	0	NA	NA
F7DFH5	Sidt2	0	0	0	1	0	0	0	0	0	0	NA	NA
F6TVH9	Sidt2	0	0	0	1	0	0	0	0	0	0	NA	NA
F7B6N2	Sidt2	0	0	0	1	0	0	0	0	0	0	NA	NA
E0CXC7	Sidt2	0	0	0	1	0	0	0	2	2	0	NA	NA
B1AT82	Prpsap1	3	6	1	1	0	6	3	1	1	1	NA	MCG6846 isoform CRA_c OS=Mus musculus OX=10090 GN=Prpsap1 PE=1 SV=1
A0A0A6YWX6	Uqcrc1	0	0	0	1	0	0	0	0	0	0	NA	NA
A2ANR6	Csnk2a1	0	0	0	1	0	0	0	0	0	0	NA	NA
D3YWT3	Tcf7l2	0	0	0	2	0	0	0	2	0	0	NA	NA
F6WPX2	Tcf7l2	0	0	0	2	0	0	0	2	0	0	NA	NA
E9QQ91	Tcf7l2	0	0	0	2	0	0	0	2	0	0	NA	NA
F6WBK9	Tcf7l2	0	0	0	2	0	0	0	2	0	0	NA	NA
F6XQR1	Tcf7l2	0	0	0	2	0	0	0	2	0	1	NA	NA
E9QQ90	Tcf7l2	0	0	0	2	0	0	0	0	0	0	NA	NA
E9QQ89	Tcf7l2	0	0	0	2	0	0	0	2	0	0	NA	NA
Q8C402	Lef1	0	0	0	2	0	0	0	2	0	0	NA	NA
Q8BGZ9	Lef1	0	0	0	2	0	0	0	2	0	0	NA	NA
E9Q990	Tcf7l2	0	0	0	2	0	0	0	2	0	0	NA	NA
K3W4L1	Taf6l	0	0	0	1	0	0	0	0	0	1	NA	NA
H3BK01	Taf6l	0	0	0	1	0	0	0	0	0	1	NA	NA
A0A1L1STF9	Sltm	0	0	1	2	0	3	0	1	1	1	Acetylation (Protein N-term)	NA
A2AJI1	Map7d1	2	1	0	1	2	0	2	0	0	0	NA	MAP7 domain-containing protein 1 OS=Mus musculus OX=10090 GN=Map7d1 PE=1 SV=1
A8Y5P4	Map7d1	2	1	0	1	2	0	2	0	0	0	NA	MAP7 domain-containing protein 1 OS=Mus musculus OX=10090 GN=Map7d1 PE=1 SV=1
Q3TYW3	Tmem185a	0	0	1	1	0	0	0	1	1	3	NA	NA
G3UZX6	Sumo3	1	1	0	1	1	0	0	2	0	0	NA	NA
H7BWX9	Sumo2	1	1	0	1	1	0	0	2	0	0	NA	NA
D3Z794	Sumo2	1	1	0	1	1	0	0	2	0	0	NA	NA
G3UZ60	Gm49325	1	1	0	1	1	0	0	2	0	0	NA	NA
G3UWI9	Sumo3	1	1	0	1	1	0	0	2	0	0	NA	NA
G3UWX9	Sumo3	1	1	0	1	1	0	0	2	0	0	NA	NA
G3UZA7	Sumo3	1	1	0	1	1	0	0	2	0	0	NA	NA
F7APP3	Nmt2	0	0	2	1	0	0	0	0	1	0	NA	NA
B1ARU1	NA	0	1	0	2	0	1	0	2	0	0	NA	NA
E9QA63	NA	2	1	3	2	0	1	2	2	0	0	NA	Microtubule-actin cross-linking factor 1 OS=Mus musculus OX=10090 GN=Macf1 PE=1 SV=2
B1ARU4	Macf1	2	1	3	2	0	1	2	2	0	0	NA	Microtubule-actin cross-linking factor 1 OS=Mus musculus OX=10090 GN=Macf1 PE=1 SV=1
E9PVY8	Macf1	2	1	3	2	0	1	2	2	0	0	NA	Microtubule-actin cross-linking factor 1 OS=Mus musculus OX=10090 GN=Macf1 PE=1 SV=2
F6Q750	Macf1	0	1	0	2	0	1	0	2	0	0	NA	NA
A0A0A0MQA6	Macf1	2	1	3	2	0	1	2	2	0	0	NA	Microtubule-actin cross-linking factor 1 OS=Mus musculus OX=10090 GN=Macf1 PE=1 SV=1
F7ACR9	Macf1	2	1	3	2	0	1	2	2	0	0	NA	Microtubule-actin cross-linking factor 1 (Fragment) OS=Mus musculus OX=10090 GN=Macf1 PE=1 SV=1
E9QNP1	NA	2	1	3	2	0	1	2	2	0	0	NA	Microtubule-actin cross-linking factor 1 OS=Mus musculus OX=10090 GN=Macf1 PE=1 SV=2
A2AIW9	Pmpca	2	1	0	1	1	0	0	0	1	1	NA	NA
Q9CWU3	Ppp2r2a	0	0	0	1	0	0	0	2	1	9	Carbamidomethylation; Acetylation (Protein N-term)	NA
B1AUX2	Hcfc1	8	6	0	1	3	3	0	2	0	0	NA	NA
E9Q2Y9	Desi1	0	0	1	2	0	0	0	1	1	0	NA	NA
F8WJJ8	Desi1	0	0	1	2	0	0	0	1	1	0	NA	NA
D6RDE8	Desi1	0	0	1	2	0	0	0	1	1	0	NA	NA
Q3TCG9	Desi1	0	0	1	2	0	0	0	1	1	0	NA	NA
G3X8R2	Sra1	0	0	0	1	0	0	0	0	0	0	NA	NA
E9PXG9	Vps53	0	0	1	1	0	0	0	0	1	2	NA	NA
E9PYD3	Vps53	0	0	0	1	0	0	0	0	0	0	NA	NA
E9PWD1	Vps53	0	0	1	1	0	0	0	0	0	0	NA	NA
A0A0G2JGR0	Hax1	1	0	0	1	0	0	0	1	0	1	NA	NA
A0A0G2JE46	Hax1	1	0	0	1	1	1	0	1	0	1	NA	NA
A0A0G2JDP0	Hax1	1	0	0	1	1	1	0	1	0	1	NA	NA
A2AQJ5	Tmem87a	0	0	0	2	0	0	0	0	0	0	NA	NA
A2AQJ6	Tmem87a	0	0	0	2	0	0	0	0	0	1	NA	NA
E9Q317	Sap18b	25	21	0	1	15	17	0	2	2	0	NA	NA
D3YY73	Sap18	0	0	0	1	0	0	0	0	0	0	NA	NA
D3Z2N9	Sap18	0	0	0	1	0	0	0	0	0	0	NA	NA
Q5SV02	Rad50	18	16	1	2	15	11	11	1	2	0	NA	DNA repair protein RAD50 OS=Mus musculus OX=10090 GN=Rad50 PE=1 SV=1
E9PUJ2	Rad50	0	0	0	2	0	0	0	1	2	0	NA	NA
Q9Z257	P2rx4	0	0	0	2	0	0	0	2	0	0	NA	NA
D6RCG2	Alg5	0	0	0	1	0	0	0	0	0	0	NA	NA
O70619	Tcstv1	0	0	0	2	0	0	0	0	0	1	NA	NA
J3QMN9	D13Ertd608e	0	0	0	2	0	0	0	0	0	1	NA	NA
Q3UPR8	D13Ertd608e	0	0	0	2	0	0	0	0	0	1	NA	NA
O70517	Gm20767	10	8	0	2	0	0	6	0	0	1	NA	Predicted gene 20767 OS=Mus musculus OX=10090 GN=Gm20767 PE=2 SV=1
O70518	Tcstv3	0	0	0	2	0	0	0	0	0	1	NA	NA
J3KMS6	Gm21818	0	0	0	2	0	0	0	0	1	1	NA	NA
O70616	AF067061	12	10	0	2	10	6	7	0	0	1	NA	AF067061 protein OS=Mus musculus OX=10090 GN=AF067061 PE=2 SV=1
J3QK00	Gm21761	0	0	0	2	8	0	0	0	0	1	NA	NA
B8JK56	Adcy3	0	0	0	1	0	0	0	3	2	6	NA	NA
A0A1L1ST25	Exosc7	0	0	1	1	0	0	0	1	0	0	NA	NA
A0A494BBK3	Pfdn1	0	1	0	3	1	1	0	1	1	0	NA	NA
A0A494BAH5	Pfdn1	0	1	0	3	0	1	0	1	1	0	NA	NA
Q9CQF7	Pfdn1	0	1	0	3	0	1	0	1	1	0	NA	NA
D6RGM1	Rfc4	0	8	0	1	8	7	0	0	1	3	NA	NA
Q3UI84	Rfc4	8	8	0	1	8	7	4	3	1	3	NA	Replication factor C subunit 4 OS=Mus musculus OX=10090 GN=Rfc4 PE=1 SV=1
A0A075B5J6	Gm20730	2	2	6	7	0	2	4	0	11	0	NA	Predicted gene 20730 OS=Mus musculus OX=10090 GN=Gm20730 PE=4 SV=7
A0A1B0GX15	Apoe	0	0	0	1	0	0	0	0	0	0	NA	NA
G3UWN5	Apoe	0	0	0	1	0	0	0	0	0	0	NA	NA
Z4YL78	Ckap5	14	14	0	1	11	16	0	2	0	0	NA	NA
A0A0R4J0K2	Ckap5	14	14	0	1	11	16	0	2	0	0	NA	NA
K3W4R5	Ckap5	14	14	0	1	11	16	0	2	0	0	NA	NA
G3UXL2	Prps1l3	7	6	2	1	7	4	3	0	1	1	NA	Phosphoribosyl pyrophosphate synthetase 1-like 3 OS=Mus musculus OX=10090 GN=Prps1l3 PE=3 SV=1
Q8C5R8	Prps1l1	0	0	0	1	0	4	0	0	1	0	NA	NA
H6TMF5	Prkacb	0	2	2	1	0	2	2	0	0	1	NA	cAMP-dependent protein kinase catalytic subunit beta (Fragment) OS=Mus musculus OX=10090 GN=Prkacb PE=1 SV=1
H3BKN2	Agps	0	0	1	1	0	0	0	0	0	0	NA	NA
A2AL50	Agps	0	0	1	1	0	0	0	0	0	0	NA	NA
A2AL49	Agps	0	0	1	1	0	0	0	0	0	0	NA	NA
A0A494BAB5	Atad1	1	1	1	2	2	1	0	1	0	1	NA	NA
F8VPX1	Usp7	6	5	0	1	7	0	8	0	0	0	NA	Ubiquitin carboxyl-terminal hydrolase 7 OS=Mus musculus OX=10090 GN=Usp7 PE=1 SV=1
E9PXY8	Usp7	6	5	0	1	7	0	8	0	0	0	NA	Ubiquitin carboxyl-terminal hydrolase 7 OS=Mus musculus OX=10090 GN=Usp7 PE=1 SV=1
Q99K94	Stat1	0	0	0	1	0	0	0	0	0	0	NA	NA
Q8C3V4	Stat1	9	8	0	1	15	7	6	0	0	1	NA	Signal transducer and activator of transcription OS=Mus musculus OX=10090 GN=Stat1 PE=1 SV=1
A0A087WSP5	Stat1	9	8	0	1	15	7	6	0	0	1	NA	Signal transducer and activator of transcription OS=Mus musculus OX=10090 GN=Stat1 PE=1 SV=1
A0A087WRI1	Stat1	0	0	0	1	0	0	0	0	0	0	NA	NA
Q8CFQ1	Stat1	0	0	0	1	0	0	0	0	0	0	NA	NA
A0A494BAG7	Bloc1s2	3	0	0	1	2	2	0	0	0	0	NA	NA
A0A0J9YUT8	Rbm19	0	0	1	1	3	0	1	1	1	0	NA	Probable RNA-binding protein 19 OS=Mus musculus OX=10090 GN=Rbm19 PE=1 SV=1
E9Q1V9	Camk2d	13	11	5	1	10	8	9	0	0	3	NA	Calcium/calmodulin-dependent protein kinase type II subunit delta OS=Mus musculus OX=10090 GN=Camk2d PE=1 SV=2
Q68EG2	Camk2b	0	0	0	1	0	0	0	1	0	0	NA	NA
Q3TWV4	Ap2m1	0	3	1	1	0	5	0	1	0	2	NA	NA
A0A338P6T4	Ap2m1	0	0	0	1	0	0	0	0	0	0	NA	NA
A0A0A6YXF6	Rhoa	2	0	1	1	3	0	0	3	5	1	Carbamidomethylation	NA
Q9D1Q5	Serpinb3b	3	2	3	1	1	1	1	1	0	1	NA	MCG21235 OS=Mus musculus OX=10090 GN=Serpinb3b PE=2 SV=1
A2RSF9	Serpinb3c	0	2	0	1	0	0	0	1	0	0	NA	NA
Q6UKZ0	Serpinb3d	3	2	0	1	0	1	0	1	2	1	NA	NA
G3X9V8	Serpinb3a	3	2	3	1	1	1	1	1	0	1	NA	MCG129038 OS=Mus musculus OX=10090 GN=Serpinb3a PE=1 SV=1
A0A0U1RPE7	Hspbp1	0	0	1	1	0	1	0	0	1	0	NA	NA
A0A0U1RQ49	Hspbp1	0	0	1	1	0	1	0	0	1	0	NA	NA
A0A0U1RPF2	Hspbp1	0	0	1	1	0	1	0	0	1	0	NA	NA
F7DE82	Slirp	0	0	0	1	0	0	0	0	0	0	NA	NA
F8WHU8	Slirp	0	0	0	1	0	0	0	0	0	0	NA	NA
Q3TUQ5	Pnn	38	31	1	1	32	26	17	1	0	2	NA	Pinin OS=Mus musculus OX=10090 GN=Pnn PE=1 SV=1
A0A075B5U6	Ighv1-20	0	0	1	1	0	2	0	5	0	0	NA	NA
A0A0A6YX66	Ighv1-20	0	0	1	1	0	2	0	5	0	0	NA	NA
A0A075B5V1	Ighv1-31	0	0	1	1	0	2	0	5	0	0	NA	NA
A0A075B5V7	Ighv1-43	0	0	1	1	0	0	0	5	0	0	NA	NA
A0A075B5V6	Ighv1-42	0	0	1	1	0	0	0	5	0	0	NA	NA
A0A075B5T4	Ighv1-4	0	2	1	1	0	2	3	5	8	9	Carbamidomethylation	Immunoglobulin heavy variable 1-4 (Fragment) OS=Mus musculus OX=10090 GN=Ighv1-4 PE=4 SV=1
A0A075B5X5	Ighv1-66	0	0	1	1	0	0	0	5	5	7	Carbamidomethylation	NA
A0A0A6YWK5	Ighv1-31	0	2	1	1	0	2	0	5	0	0	NA	NA
A0A0A6YY38	Ighv1-42	0	0	1	1	0	2	0	5	0	0	NA	NA
A0A075B5U7	Ighv1-22	0	0	0	1	0	0	0	5	0	0	NA	NA
A0A075B5V5	Ighv1-39	0	0	1	1	0	0	0	5	0	0	NA	NA
A0A075B5W6	Ighv1-55	0	2	1	1	0	2	0	5	0	0	NA	NA
A0A075B5W1	Ighv1-50	0	2	1	1	0	2	0	5	0	0	NA	NA
A0A0A6YXN5	Ighv1-43	0	0	1	1	0	0	0	5	0	0	NA	NA
A0A075B5X3	Ighv1-64	0	2	1	1	0	2	0	5	0	0	NA	NA
A0A0G2JDV6	Ubap2l	0	4	0	1	4	3	4	0	0	0	NA	Ubiquitin associated protein 2-like isoform CRA_g OS=Mus musculus OX=10090 GN=Ubap2l PE=1 SV=1
E0CYU5	Mat2b	1	0	0	1	1	1	0	1	0	0	NA	NA
A0A0G2JE93	Stard3nl	0	0	1	1	0	0	0	1	1	3	Acetylation (Protein N-term)	NA
A0A1Y7VJA7	Stard3nl	0	0	1	1	0	0	0	1	1	3	Acetylation (Protein N-term)	NA
A0A0G2JFP4	Frrs1	0	0	0	2	0	0	0	3	1	0	NA	NA
A0A1B0GRU8	Prpf40a	9	5	0	1	8	6	3	1	0	0	NA	Pre-mRNA-processing factor 40 homolog A OS=Mus musculus OX=10090 GN=Prpf40a PE=1 SV=1
A0A140LIL2	Tspan32	0	0	0	1	0	0	0	4	0	0	NA	NA
G3X9S3	Tspan32	0	0	3	1	0	0	0	4	0	0	NA	NA
Q7TNQ7	Tspan32	0	0	0	1	0	0	0	4	0	0	NA	NA
Q3U3L6	Tspan32	0	0	3	1	0	0	0	4	3	0	NA	NA
F6TQN1	Rnf19b	0	0	0	1	0	0	0	1	0	0	NA	NA
E9Q9N6	Mark2	0	0	0	1	0	0	0	0	0	0	NA	NA
E9PYX3	Mark2	0	0	0	1	0	0	0	0	0	0	NA	NA
A0A0R4J0B1	Mark2	0	0	0	1	0	0	0	0	0	0	NA	NA
Q3T9A3	Mark2	0	0	0	1	0	0	3	1	1	2	NA	Non-specific serine/threonine protein kinase OS=Mus musculus OX=10090 GN=Mark2 PE=1 SV=1
F6ZS70	Mark2	0	0	0	1	0	0	3	0	1	2	NA	Non-specific serine/threonine protein kinase (Fragment) OS=Mus musculus OX=10090 GN=Mark2 PE=1 SV=1
E9QMP6	Mark2	0	0	0	1	0	0	3	0	0	2	NA	Non-specific serine/threonine protein kinase OS=Mus musculus OX=10090 GN=Mark2 PE=1 SV=2
A0A087WP83	Hdlbp	0	0	1	1	0	1	0	1	0	0	NA	NA
A0A1D5RMF7	B4galnt3	0	0	1	3	0	0	0	0	1	0	NA	NA
A0A0R4J212	Nedd9	3	0	2	2	4	0	3	2	0	0	NA	Enhancer of filamentation 1 OS=Mus musculus OX=10090 GN=Nedd9 PE=1 SV=1
G3UXW9	Gps1	4	4	0	2	6	2	3	0	0	0	NA	COP9 signalosome complex subunit 1 OS=Mus musculus OX=10090 GN=Gps1 PE=1 SV=1
A0A140LJB7	Gps1	4	4	0	2	0	0	3	0	0	0	NA	COP9 signalosome complex subunit 1 OS=Mus musculus OX=10090 GN=Gps1 PE=1 SV=1
Q3MIA8	Gps1	4	4	0	2	6	2	3	0	0	0	NA	COP9 signalosome complex subunit 1 OS=Mus musculus OX=10090 GN=Gps1 PE=1 SV=1
E9PWR7	Evi5	0	0	0	1	0	0	0	0	0	0	NA	NA
F7ARZ1	Mrps23	0	0	0	1	0	0	0	1	0	0	NA	NA
Q5SXC9	Mrps23	0	0	0	1	0	0	0	1	0	0	NA	NA
E9Q8T1	Tacc2	2	2	3	3	0	0	0	3	3	0	NA	NA
A0A1L1SS37	Tacc2	2	2	3	3	0	0	0	3	3	0	NA	NA
A0A140LHH8	Tacc2	2	2	3	3	0	0	0	3	3	0	NA	NA
E9QP19	Trim33	0	3	1	1	0	0	0	0	0	2	NA	NA
E9PXI0	Vav1	2	2	0	1	5	1	6	1	0	3	NA	Proto-oncogene vav OS=Mus musculus OX=10090 GN=Vav1 PE=1 SV=1
Q8C7X8	Bri3	0	0	1	1	0	0	0	1	0	0	NA	NA
E9PUB2	Bri3	0	0	1	1	0	0	0	1	0	0	NA	NA
A0A1W2P756	Timm13	0	0	0	1	1	0	0	0	1	0	NA	NA
E9PWE8	Dpysl3	0	0	0	1	0	1	0	0	0	0	NA	NA
F6ZHD8	Gbe1	1	1	0	1	0	0	10	0	0	6	Acetylation (Protein N-term)	1 4-alpha-glucan-branching enzyme OS=Mus musculus OX=10090 GN=Gbe1 PE=1 SV=2
A2AFQ9	Gemin5	0	0	0	1	0	0	0	0	1	0	NA	NA
E9PUU4	Gemin5	57	45	0	1	50	50	26	0	1	0	NA	Gem-associated protein 5 OS=Mus musculus OX=10090 GN=Gemin5 PE=1 SV=1
E9PZ43	Map4	0	0	0	1	0	0	0	1	0	0	NA	NA
A0A0G2JDN7	Map4	0	0	0	1	0	0	0	0	0	0	NA	NA
A0A0G2JFH2	Map4	0	0	0	1	0	0	0	1	0	0	NA	NA
A0A0G2JFK3	Map4	0	0	0	1	0	0	0	0	0	0	NA	NA
A0A0G2JDY5	Map4	0	0	0	1	0	0	0	0	0	0	NA	NA
A0A0G2JG35	Map4	0	0	0	1	0	0	0	1	0	0	NA	NA
A0A140T8T5	Map4	0	0	0	1	0	0	0	1	0	0	NA	NA
A0A0G2JFT4	Map4	0	0	0	1	0	0	0	0	0	0	NA	NA
A0A1L1SRY8	Mrpl4	2	0	1	1	0	1	0	0	0	1	NA	NA
H3BJU7	Arhgef2	17	22	0	1	19	21	4	2	1	0	NA	Rho guanine nucleotide exchange factor 2 OS=Mus musculus OX=10090 GN=Arhgef2 PE=1 SV=1
H3BJX8	Arhgef2	17	22	0	1	19	21	4	2	1	0	NA	Rho guanine nucleotide exchange factor 2 OS=Mus musculus OX=10090 GN=Arhgef2 PE=1 SV=1
H3BJ45	Arhgef2	17	22	0	1	19	21	4	2	1	1	NA	Rho guanine nucleotide exchange factor 2 OS=Mus musculus OX=10090 GN=Arhgef2 PE=1 SV=1
H3BJ40	Arhgef2	17	22	0	1	19	21	4	2	1	0	NA	Rho guanine nucleotide exchange factor 2 OS=Mus musculus OX=10090 GN=Arhgef2 PE=1 SV=1
H3BKH9	Arhgef2	17	22	0	1	19	21	4	2	1	0	NA	Rho guanine nucleotide exchange factor 2 OS=Mus musculus OX=10090 GN=Arhgef2 PE=1 SV=1
E9Q8R5	Trabd	0	0	0	1	0	0	0	0	0	1	NA	NA
E9Q7A5	Trabd	0	0	0	1	0	0	0	0	0	0	NA	NA
A0A0R4J0D0	Snx20	0	0	1	1	0	0	0	1	0	2	Carbamidomethylation	NA
Q8BVV6	Eif5	5	7	0	1	0	3	2	0	0	0	NA	Eukaryotic translation initiation factor 5 OS=Mus musculus OX=10090 GN=Eif5 PE=1 SV=1
F6S0R8	Sccpdh	0	0	0	1	0	0	0	0	0	0	NA	NA
A0A0R4J138	Arsb	0	0	1	1	0	0	0	0	1	2	NA	NA
D3YX87	Msto1	0	0	0	1	0	0	0	0	0	0	NA	NA
A0A0R4J175	Brd9	0	0	0	2	0	4	2	0	0	0	NA	Bromodomain-containing protein 9 OS=Mus musculus OX=10090 GN=Brd9 PE=1 SV=1
A2AAN2	Srp68	9	3	0	1	4	3	1	0	1	0	NA	Signal recognition particle subunit SRP68 OS=Mus musculus OX=10090 GN=Srp68 PE=1 SV=1
D3YUP1	Carm1	2	0	0	1	0	0	1	2	1	0	NA	Histone-arginine methyltransferase CARM1 OS=Mus musculus OX=10090 GN=Carm1 PE=1 SV=1
Q91XX0	Pcdhgc4	0	1	1	2	0	1	1	0	0	1	NA	MCG133388 isoform CRA_r OS=Mus musculus OX=10090 GN=Pcdhgc4 PE=1 SV=1
H3BIV7	Ppp2r1b	0	0	0	1	6	0	0	0	0	0	NA	NA
H3BLQ0	Ppp2r1b	6	7	0	1	0	0	0	0	0	0	NA	NA
H3BLE7	Ppp2r1b	6	0	0	1	0	0	0	1	0	0	NA	NA
Q3TTF6	Ppp2r1b	6	7	0	1	6	0	0	1	1	0	NA	NA
H3BKU1	Ppp2r1b	6	7	0	1	6	0	0	0	0	0	NA	NA
G3UWS4	Ppp2r1b	6	7	0	1	6	0	0	1	0	0	NA	NA
Q5SXC4	Vezf1	0	0	0	1	0	0	0	1	0	2	NA	NA
Q5NBZ2	Patz1	0	2	0	1	0	0	0	0	0	0	NA	NA
Q5NBZ1	Patz1	0	2	0	1	0	0	0	0	0	0	NA	NA
Q9JMG9	Patz1	0	2	0	1	0	0	0	0	0	0	NA	NA
Q5NBY9	Patz1	0	2	0	1	0	0	0	0	0	0	NA	NA
Q8VCR4	Trmt112	0	2	0	1	3	0	0	3	0	0	NA	NA
A2ARI1	Tmx4	0	0	0	1	0	0	0	0	0	0	NA	NA
A2ARI0	Tmx4	0	0	0	1	0	0	0	0	0	0	NA	NA
A0A494BB26	Haus1	2	0	0	1	1	1	1	0	0	0	NA	HAUS augmin-like complex subunit 1 OS=Mus musculus OX=10090 GN=Haus1 PE=1 SV=1
A0A1W2P6N1	Lsm7	0	0	0	1	1	0	0	1	1	0	NA	NA
G8JL68	Myef2	0	0	0	2	0	0	0	0	0	0	NA	NA
F6XJA1	Myef2	0	0	0	2	0	0	0	0	0	0	NA	NA
A2ATP5	Myef2	3	3	0	2	5	3	4	3	1	0	NA	Myelin expression factor 2 OS=Mus musculus OX=10090 GN=Myef2 PE=1 SV=1
A2ATP6	Myef2	3	3	0	2	5	3	4	3	1	1	Acetylation (Protein N-term)	Myelin expression factor 2 OS=Mus musculus OX=10090 GN=Myef2 PE=1 SV=2
F8WIR1	Ctsd	9	3	0	1	5	0	5	3	0	7	Carbamidomethylation; Oxidation (M)	Cathepsin D OS=Mus musculus OX=10090 GN=Ctsd PE=1 SV=2
H3BJT9	Mrpl17	0	0	0	1	0	0	0	0	0	0	NA	NA
H3BIZ3	Mrpl17	0	0	0	1	0	0	0	0	0	0	NA	NA
Q91VA7	Idh3b	5	6	0	1	7	4	0	0	0	0	NA	NA
A0A1W2P720	Sar1a	0	0	0	1	0	0	0	0	0	0	NA	NA
A0A1W2P869	Sar1a	0	0	0	1	0	0	0	0	0	0	NA	NA
A0A1W2P6N3	Sar1a	0	0	0	1	0	0	0	0	0	0	NA	NA
Q99JZ4	Sar1a	0	0	0	1	0	0	0	0	0	0	NA	NA
A2ALV7	Ecpas	0	6	0	1	0	0	1	0	0	2	NA	Proteasome adapter and scaffold protein ECM29 (Fragment) OS=Mus musculus OX=10090 GN=Ecpas PE=1 SV=1
E9Q4K9	Smurf1	0	0	0	1	0	0	0	0	0	0	NA	NA
E9PYU8	Smurf1	0	0	0	1	0	0	0	0	0	0	NA	NA
Q8C257	Il18r1	0	0	0	1	0	0	0	1	1	0	NA	NA
D3Z3S1	Preb	0	2	1	1	0	1	0	1	2	4	NA	NA
F6QFD1	Pde4d	0	0	0	1	0	0	1	0	0	1	NA	Phosphodiesterase (Fragment) OS=Mus musculus OX=10090 GN=Pde4d PE=1 SV=1
E9PU96	Urb1	0	0	0	1	0	0	0	1	2	0	NA	NA
F6XMS4	Pus7	0	0	0	1	0	0	0	0	0	0	NA	NA
E9QKE9	Cux1	1	1	0	1	1	0	0	3	2	0	NA	NA
H3BLS0	Cux1	0	1	0	1	1	0	0	3	2	0	NA	NA
H3BJQ9	Cux1	0	1	0	1	1	0	0	3	2	0	NA	NA
H3BK24	Cux1	0	1	0	1	1	0	0	3	2	0	NA	NA
A0A1Y7VKZ4	Bzw2	0	0	1	1	0	1	0	2	1	0	NA	NA
A2AK44	Cwc22rt3	0	0	0	1	0	0	0	0	0	0	NA	NA
A2A6Q8	Myl4	6	5	0	1	4	7	0	0	0	0	NA	NA
Q9CZ19	Myl4	6	5	0	1	4	7	0	0	0	0	NA	NA
A0A2I3BPD0	Atp6v1c1	0	0	0	1	0	0	0	0	0	0	NA	NA
A0A0J9YUE9	Dnm1	0	0	0	1	0	1	0	0	0	0	NA	NA
A0A0R4IZY1	Dtx2	0	0	0	1	0	0	0	0	0	2	NA	NA
Q9CX65	Senp7	0	0	0	1	0	0	0	0	0	0	NA	NA
E9Q1L5	Senp7	0	0	0	1	0	0	0	0	0	0	NA	NA
B1ASL6	Tnfrsf18	0	0	0	1	0	0	0	0	0	0	NA	NA
D3Z7F7	Cpped1	0	0	0	1	0	0	0	0	1	0	NA	NA
H3BIY9	Ap2b1	0	0	3	1	0	0	0	1	1	1	Carbamidomethylation	NA
A0A087WQS2	Bzw1	0	0	0	1	1	0	0	1	0	3	NA	NA
A0A087WS48	Bzw1	0	0	0	1	0	0	0	1	0	0	NA	NA
F6YCA7	Cops3	0	0	0	1	0	0	0	0	0	0	NA	NA
A0A286YDB7	Ssr1	0	0	0	1	0	1	0	0	0	0	NA	NA
A0A286YCT4	Ssr1	0	0	0	1	0	1	0	0	0	0	NA	NA
A0A286YCG8	Ssr1	0	0	0	1	0	1	0	0	0	0	NA	NA
H3BKQ6	Snx17	0	0	0	1	0	0	0	0	0	0	NA	NA
D3Z3J1	Snx17	0	0	0	1	0	0	0	0	0	0	NA	NA
H3BKG9	Snx17	0	0	0	1	0	0	0	0	0	0	NA	NA
A0A0N4SUI1	Vsig10l	0	0	0	1	0	0	0	0	0	0	NA	NA
Q91V89	Ppp2r5d	0	0	0	1	0	0	0	0	0	0	NA	NA
Q7TNL5	Ppp2r5d	0	0	0	1	0	0	0	0	0	0	NA	NA
A0A087WQF8	Ktn1	9	2	0	1	4	5	1	1	0	1	NA	Kinectin OS=Mus musculus OX=10090 GN=Ktn1 PE=1 SV=1
A0A087WP48	Ktn1	9	2	0	1	4	5	1	1	0	1	NA	Kinectin OS=Mus musculus OX=10090 GN=Ktn1 PE=1 SV=1
A0A087WS04	Ktn1	9	2	0	1	4	5	1	1	0	1	NA	Kinectin OS=Mus musculus OX=10090 GN=Ktn1 PE=1 SV=1
A0A087WS29	Ktn1	9	2	0	1	4	5	1	1	0	1	NA	Kinectin OS=Mus musculus OX=10090 GN=Ktn1 PE=1 SV=1
A0A087WQG4	Ktn1	9	2	0	1	4	5	1	1	0	1	NA	Kinectin OS=Mus musculus OX=10090 GN=Ktn1 PE=1 SV=1
A0A087WNW3	Ktn1	9	2	0	1	4	5	1	1	0	1	NA	Kinectin OS=Mus musculus OX=10090 GN=Ktn1 PE=1 SV=1
A0A087WQD0	Ktn1	9	2	0	1	4	5	1	1	0	1	NA	Kinectin OS=Mus musculus OX=10090 GN=Ktn1 PE=1 SV=1
A0A087WQI3	Ktn1	9	2	0	1	4	5	1	1	0	1	NA	Kinectin OS=Mus musculus OX=10090 GN=Ktn1 PE=1 SV=1
A0A087WPW5	Ktn1	9	2	0	1	4	5	1	0	0	1	NA	Kinectin OS=Mus musculus OX=10090 GN=Ktn1 PE=1 SV=1
A0A087WS23	Ktn1	9	2	0	1	4	5	1	0	0	1	NA	Kinectin OS=Mus musculus OX=10090 GN=Ktn1 PE=1 SV=1
A0A087WQ25	Ktn1	9	2	0	1	4	5	1	0	0	1	NA	Kinectin OS=Mus musculus OX=10090 GN=Ktn1 PE=1 SV=1
A0A087WP85	Ktn1	9	2	0	1	4	5	1	0	0	1	NA	Kinectin OS=Mus musculus OX=10090 GN=Ktn1 PE=1 SV=1
A0A087WQQ5	Ktn1	9	2	0	1	4	5	1	1	0	1	NA	Kinectin OS=Mus musculus OX=10090 GN=Ktn1 PE=1 SV=1
A0A087WRS1	Ktn1	9	2	0	1	4	5	1	0	0	1	NA	Kinectin OS=Mus musculus OX=10090 GN=Ktn1 PE=1 SV=1
A0A087WP14	Ktn1	9	2	0	1	4	5	1	1	0	1	NA	Kinectin OS=Mus musculus OX=10090 GN=Ktn1 PE=1 SV=1
A0A087WPX0	Ktn1	9	2	0	1	4	5	1	1	0	1	NA	Kinectin OS=Mus musculus OX=10090 GN=Ktn1 PE=1 SV=1
F8VQC7	Ktn1	9	2	0	1	4	5	1	1	0	1	NA	Kinectin OS=Mus musculus OX=10090 GN=Ktn1 PE=1 SV=1
A0A0N4SUH8	Nfu1	0	0	0	1	0	0	0	1	0	0	NA	NA
Q3V3P1	Top3a	0	0	0	1	0	0	0	0	0	0	NA	NA
A0A494BB31	Txnl1	0	0	1	1	0	0	0	0	0	0	NA	NA
A0A494BBI1	Txnl1	0	0	1	1	0	3	0	0	0	0	NA	NA
A0A494B955	Txnl1	0	0	1	1	0	3	0	0	0	0	NA	NA
A0A498WGD8	Txnl1	0	0	1	1	3	3	0	0	0	5	NA	NA
F6SBR5	Cit	1	0	1	1	0	0	0	0	0	0	NA	NA
D3Z1U0	Cit	1	0	1	1	0	0	0	0	0	0	NA	NA
E9QL53	Cit	1	0	1	1	0	0	0	0	0	0	NA	NA
D3YU89	Cit	1	0	1	1	0	0	0	0	0	0	NA	NA
A0A0R4J255	Odf4	0	0	2	2	0	0	0	0	0	0	NA	NA
A0A1B0GSX7	Nup98	3	3	0	1	5	1	0	0	1	0	NA	NA
A0A338P6D4	Heg1	0	0	0	1	0	0	0	0	0	0	NA	NA
E9Q440	Heg1	0	0	0	1	0	0	0	0	0	0	NA	NA
Q9JLI0	Akr1c12	0	0	0	1	0	0	3	1	0	0	NA	Aldo-keto reductase a OS=Mus musculus OX=10090 GN=Akr1c12 PE=1 SV=1
F8WIE5	Hectd1	0	0	0	1	2	0	0	3	0	0	NA	NA
B1AYL0	Scn9a	0	0	0	1	0	0	0	0	0	0	NA	NA
E9PW82	Scn9a	0	0	0	1	0	0	0	0	0	0	NA	NA
F8VPQ7	Scn9a	0	0	0	1	0	0	0	0	0	0	NA	NA
A0A0U1RQ61	Ptcd3	0	0	0	1	0	0	0	0	0	0	NA	NA
B1AUN3	Eif2b3	6	6	1	1	10	7	2	1	2	0	NA	Eukaryotic translation initiation factor 2B subunit 3 OS=Mus musculus OX=10090 GN=Eif2b3 PE=1 SV=1
Q3UKV0	Eif2b3	6	6	1	1	10	7	2	1	2	0	NA	Eukaryotic translation initiation factor 2B subunit 3 OS=Mus musculus OX=10090 GN=Eif2b3 PE=1 SV=1
B1AUN2	Eif2b3	6	6	1	1	10	7	0	1	2	0	NA	NA
E9Q6A2	Serpine3	0	0	0	1	0	0	0	0	0	0	NA	NA
A0A1D5RLV7	Wdfy3	0	0	0	1	0	0	0	0	0	0	NA	NA
G3UYW1	Wdfy3	0	0	0	1	0	0	0	0	0	0	NA	NA
A2AVE0	Il9r	0	0	2	1	0	0	0	0	2	2	Carbamidomethylation	NA
B7ZD65	Il9r	0	0	2	1	0	0	0	0	2	2	Carbamidomethylation	NA
A0A0A6YXP3	Mbnl1	0	0	0	1	0	0	1	0	0	0	NA	Muscleblind-like protein 1 (Fragment) OS=Mus musculus OX=10090 GN=Mbnl1 PE=1 SV=1
A0A0A6YWB0	Mbnl1	0	0	0	1	0	0	1	0	0	0	NA	Muscleblind-like protein 1 OS=Mus musculus OX=10090 GN=Mbnl1 PE=1 SV=1
G3X9Q0	Mbnl1	1	0	0	1	0	0	1	0	0	0	NA	Muscleblind-like 1 (Drosophila) isoform CRA_a OS=Mus musculus OX=10090 GN=Mbnl1 PE=1 SV=1
A0A0A6YVV8	Mbnl1	0	0	0	1	0	0	1	0	0	0	NA	Muscleblind-like protein 1 OS=Mus musculus OX=10090 GN=Mbnl1 PE=1 SV=1
D3Z4Z0	Tada2b	0	1	0	1	0	0	0	0	0	1	NA	NA
E9Q4T0	Hjurp	3	2	0	1	4	3	1	0	0	0	NA	Holliday junction recognition protein OS=Mus musculus OX=10090 GN=Hjurp PE=1 SV=1
E9QKG8	Hjurp	3	2	0	1	4	3	0	0	0	0	NA	NA
E9PV45	Usp24	2	0	0	2	0	0	1	1	0	0	NA	Ubiquitin carboxyl-terminal hydrolase 24 OS=Mus musculus OX=10090 GN=Usp24 PE=1 SV=1
Q3U3A7	Mta3	5	0	0	1	8	0	6	1	0	1	NA	Metastasis-associated protein MTA3 OS=Mus musculus OX=10090 GN=Mta3 PE=1 SV=1
E9Q794	Mta3	5	0	0	1	8	0	6	1	0	1	NA	Metastasis-associated protein MTA3 OS=Mus musculus OX=10090 GN=Mta3 PE=1 SV=1
Q3UII8	Mta3	5	0	1	1	8	0	6	1	0	1	NA	Metastasis-associated protein MTA3 OS=Mus musculus OX=10090 GN=Mta3 PE=1 SV=1
E9Q3W4	Plec	9	8	2	1	0	18	0	1	1	7	NA	NA
E9QNX9	Igf1r	0	0	0	1	1	0	0	0	0	0	NA	NA
E9QKL0	Rad54l2	0	0	0	1	0	0	0	0	0	0	NA	NA
E9PYM7	Man2c1	0	0	0	1	2	0	0	0	1	0	NA	NA
E9PZ88	Man2c1	4	0	1	1	0	2	4	0	1	0	NA	Alpha-mannosidase 2C1 OS=Mus musculus OX=10090 GN=Man2c1 PE=1 SV=1
F8WIE1	Man2c1	4	3	1	1	2	2	4	0	1	2	Carbamidomethylation	Alpha-mannosidase 2C1 OS=Mus musculus OX=10090 GN=Man2c1 PE=1 SV=1
F8WIT2	Anxa6	0	0	1	1	2	0	0	0	0	4	NA	NA
A0A0N4SVU8	Tmem176a	0	0	0	1	0	0	0	0	0	0	NA	NA
A0A0N4SVW3	Tmem176a	0	0	0	1	0	0	0	0	0	0	NA	NA
D3Z1J2	Ccdc112	0	0	0	1	0	0	0	0	0	0	NA	NA
H3BL37	Tcof1	2	0	0	1	0	0	0	0	0	0	NA	NA
F6R3V4	Tcof1	0	0	0	1	0	0	0	0	0	0	NA	NA
D3YY07	Zdhhc13	0	0	0	1	1	0	0	0	1	0	NA	NA
V9GXD9	Synrg	1	1	0	1	1	1	0	0	0	0	NA	NA
V9GX40	Synrg	1	1	0	1	1	1	0	0	0	0	NA	NA
H3BK45	Cbx7	0	0	0	1	0	0	0	0	0	0	NA	NA
A0A0U1RPI0	1110004F10Rik	0	0	0	1	0	0	0	0	0	1	NA	NA
A0A0U1RPJ7	1110004F10Rik	0	0	0	1	0	0	0	0	0	1	NA	NA
D6RI64	1110004F10Rik	0	0	0	1	0	0	0	0	0	1	NA	NA
D3YVR9	1110004F10Rik	0	0	0	1	0	0	0	0	0	1	NA	NA
A2ATI8	Gorasp2	0	0	0	1	0	0	0	0	0	0	NA	NA
A2ATI6	Gorasp2	0	0	0	1	0	0	0	0	0	0	NA	NA
A2ATI9	Gorasp2	0	0	0	1	0	0	0	0	0	0	NA	NA
G3UZQ4	Sra1	0	0	0	1	0	0	0	0	0	0	NA	NA
E9PZ87	Pappa2	0	0	0	1	0	0	0	0	0	0	NA	NA
A0A286YDR8	Kif13a	0	0	0	1	0	0	0	0	0	0	NA	NA
F8VQ75	Kif13a	1	0	0	1	0	0	0	0	0	0	NA	NA
E9Q8N1	Ttn	2	2	1	1	2	3	3	1	0	1	NA	Titin OS=Mus musculus OX=10090 GN=Ttn PE=1 SV=1
E9Q8K5	Ttn	2	2	1	1	2	3	3	1	0	1	NA	Titin OS=Mus musculus OX=10090 GN=Ttn PE=1 SV=1
Q5EC55	Amh	0	0	0	1	0	0	0	0	0	0	NA	NA
F6SMY7	Mycbp2	1	0	0	1	0	0	0	0	0	0	NA	NA
A0A0J9YVB4	Maea	0	0	0	1	0	0	0	0	0	0	NA	NA
Q504P4	Hspa8	0	0	0	0	0	0	0	1145	0	0	NA	NA
A3KGU5	Sptan1	332	310	0	0	521	510	380	167	106	0	NA	Spectrin alpha chain non-erythrocytic 1 OS=Mus musculus OX=10090 GN=Sptan1 PE=1 SV=1
E9Q447	Sptan1	0	310	0	0	0	0	0	167	106	0	NA	NA
A3KGU7	Sptan1	0	0	0	0	0	0	0	165	0	74	Carbamidomethylation; Oxidation (M)	NA
A3KGU9	Sptan1	0	0	0	0	0	0	0	165	0	74	Carbamidomethylation; Oxidation (M)	NA
A2A513	Krt10	0	149	173	0	0	0	144	162	150	192	Oxidation (M)	Keratin type I cytoskeletal 10 OS=Mus musculus OX=10090 GN=Krt10 PE=1 SV=1
A0A140T8M0	Igkv1-117	0	36	0	0	0	37	0	128	80	184	Carbamidomethylation; Acetylation (Protein N-term)	NA
E9QN52	Lrrfip2	188	187	104	0	216	158	0	79	107	101	Carbamidomethylation; Oxidation (M)	NA
D3Z2H9	Tpm3-rs7	154	153	0	0	219	197	0	65	78	0	NA	NA
A2AW05	Ssrp1	0	20	54	0	36	0	0	44	0	0	NA	NA
B1AXW5	Prdx1	0	0	40	0	0	0	0	43	0	0	NA	NA
B1AXW6	Prdx1	0	0	40	0	0	0	0	43	0	0	NA	NA
A0A494B9F5	Ndfip1	15	24	0	0	0	16	0	43	0	0	NA	NA
V9GXQ2	NA	75	67	39	0	90	70	68	36	33	25	NA	Predicted gene 17087 OS=Mus musculus OX=10090 GN=Gm17087 PE=1 SV=1
Q9D6T8	2310057N15Rik	0	0	0	0	0	0	0	34	0	0	NA	NA
E9Q453	Tpm1	0	0	0	0	0	0	0	30	0	22	Acetylation (Protein N-term); Oxidation (M)	NA
E9Q456	Tpm1	104	99	0	0	111	126	0	30	0	22	Acetylation (Protein N-term); Oxidation (M)	NA
F8WHZ9	Add1	0	0	18	0	0	0	0	30	0	0	NA	NA
F8WGR0	Add1	0	138	18	0	244	192	0	30	0	0	NA	NA
E9QNP3	Hrnr	0	0	0	0	0	0	0	25	0	0	NA	NA
F8WJ23	Hrnr	0	0	0	0	0	0	0	25	0	0	NA	NA
D3Z724	Gm5965	0	0	0	0	0	0	0	24	0	0	NA	NA
Q91YZ8	Pabpc4	0	0	24	0	0	0	79	23	29	20	Carbamidomethylation	Polyadenylate-binding protein OS=Mus musculus OX=10090 GN=Pabpc4 PE=1 SV=1
A3KFU8	Pabpc4	0	0	24	0	0	0	79	23	29	20	Carbamidomethylation	Polyadenylate-binding protein OS=Mus musculus OX=10090 GN=Pabpc4 PE=1 SV=1
A0A0R4J1L2	Eef1d	20	23	23	0	24	29	24	23	0	0	NA	Elongation factor 1-delta OS=Mus musculus OX=10090 GN=Eef1d PE=1 SV=1
O88375	Krtap13	0	0	0	0	0	0	0	22	0	0	NA	NA
A2BIN1	Mup10	0	0	3	0	2	3	1	20	0	0	NA	Major urinary protein 10 OS=Mus musculus OX=10090 GN=Mup10 PE=2 SV=1
Q4FZE8	Mup22	1	0	3	0	2	3	1	20	0	0	NA	Major urinary protein 1 OS=Mus musculus OX=10090 GN=Mup22 PE=1 SV=1
Z4YKV1	Gnas	3	3	17	0	5	4	4	19	0	0	NA	Guanine nucleotide-binding protein G(s) subunit alpha isoforms short OS=Mus musculus OX=10090 GN=Gnas PE=1 SV=1
Q9D746	2310034C09Rik	0	0	0	0	0	0	0	19	0	0	NA	NA
A2AKN8	Mup8	0	0	3	0	2	3	1	18	0	0	NA	Major urinary protein 5 OS=Mus musculus OX=10090 GN=Mup8 PE=3 SV=1
A2AIM4	Tpm2	0	0	0	0	66	0	51	17	0	0	NA	Tropomyosin beta chain OS=Mus musculus OX=10090 GN=Tpm2 PE=1 SV=1
A0A087WPL5	Dhx9	0	18	26	0	0	0	0	16	0	14	Carbamidomethylation	NA
Q68FG2	Sptbn2	0	0	0	0	0	0	10	16	0	0	NA	Spectrin beta chain OS=Mus musculus OX=10090 GN=Sptbn2 PE=1 SV=1
A0A0N4SVC2	Tra2a	0	0	0	0	0	0	0	15	15	8	Acetylation (Protein N-term)	NA
Q6IFZ8	Gm5414	0	0	27	0	0	0	0	14	0	30	NA	NA
A0A140T8T4	Rpl9-ps6	10	6	0	0	15	7	6	13	0	4	NA	Ribosomal protein L9 pseudogene 6 OS=Mus musculus OX=10090 GN=Rpl9-ps6 PE=4 SV=1
A0A1B0GQU8	Rpl18	0	14	0	0	0	0	0	11	0	10	NA	NA
A0A087WRY3	Nucks1	0	0	0	0	0	0	0	11	0	0	NA	NA
A2ADR8	Ppp1r8	0	0	0	0	0	2	1	10	0	0	NA	Nuclear inhibitor of protein phosphatase 1 OS=Mus musculus OX=10090 GN=Ppp1r8 PE=1 SV=1
B0V2N8	Anxa2	0	0	0	0	0	0	0	9	0	0	NA	NA
B0V2N7	Anxa2	0	0	0	0	0	0	0	9	0	0	NA	NA
F7BUB8	Epb41	0	0	0	0	0	0	0	9	0	0	NA	NA
E9Q855	Scamp3	1	2	0	0	0	0	0	8	0	14	NA	NA
Q3UXS0	Scamp3	0	2	0	0	0	0	0	8	0	14	NA	NA
A0A494BB86	Actr1a	0	0	0	0	0	0	11	8	0	10	Carbamidomethylation; Oxidation (M)	Alpha-centractin OS=Mus musculus OX=10090 GN=Actr1a PE=1 SV=1
A2BI12	Psip1	0	3	5	0	0	0	3	8	2	3	NA	PC4 and SFRS1-interacting protein OS=Mus musculus OX=10090 GN=Psip1 PE=1 SV=1
Q99N15	Hsd17b10	7	0	11	0	0	2	4	7	12	0	NA	17beta-hydroxysteroid dehydrogenase type 10/short chain L-3-hydroxyacyl-CoA dehydrogenase OS=Mus musculus OX=10090 GN=Hsd17b10 PE=1 SV=1
A0A286YE28	Tkt	2	3	0	0	0	2	5	7	4	0	NA	Transketolase (Fragment) OS=Mus musculus OX=10090 GN=Tkt PE=1 SV=1
Q3TML0	Pdia6	21	14	5	0	16	16	0	6	9	1	NA	NA
G3X926	Rpf2	0	5	3	0	0	0	0	5	3	1	NA	NA
A0A075B5V9	Ighv1-49	0	0	0	0	0	0	0	5	0	0	NA	NA
A0A0A6YWX2	Ighv1-49	0	0	0	0	0	0	0	5	0	0	NA	NA
A0A075B5V0	Ighv1-26	0	0	0	0	0	0	0	5	0	0	NA	NA
A0A075B5V3	Ighv1-36	0	0	0	0	0	0	0	5	0	8	Carbamidomethylation	NA
A0A0A6YXT2	Ighv1-36	0	0	0	0	0	0	0	5	0	8	Carbamidomethylation	NA
A0A075B5U5	Ighv1-19	0	0	0	0	0	0	0	5	0	8	Carbamidomethylation	NA
A0A075B5X7	Ighv1-69	0	0	0	0	0	0	0	5	0	0	NA	NA
A0A075B5X0	Ighv1-59	0	0	0	0	0	0	0	5	0	0	NA	NA
A0A075B5W2	Ighv1-52	0	2	0	0	0	0	0	5	0	0	NA	NA
A0A0G2JFS5	Ighv1-69	0	0	0	0	0	0	0	5	0	0	NA	NA
A0A0A6YXE0	Ighv1-59	0	0	0	0	0	0	0	5	0	0	NA	NA
A0A075B5W3	Ighv1-53	0	0	0	0	0	0	0	5	0	0	NA	NA
A0A0A6YXC3	Ighv1-52	0	0	0	0	0	0	0	5	0	0	NA	NA
A0A075B5V2	Ighv1-34	0	0	0	0	0	0	0	5	0	0	NA	NA
A0A0A6YWX0	Ighv1-19	0	0	0	0	0	0	0	5	0	8	Carbamidomethylation	NA
Q3UDD3	Poldip3	0	0	0	0	0	0	0	5	0	0	NA	NA
F6ZBL2	Mib1	0	0	0	0	0	0	0	4	0	0	NA	NA
D3YXU1	Hadhb	0	0	2	0	0	0	0	4	0	3	NA	NA
D3Z4U0	Zranb2	3	5	5	0	4	4	11	4	5	11	Carbamidomethylation	Zinc finger Ran-binding domain-containing protein 2 OS=Mus musculus OX=10090 GN=Zranb2 PE=1 SV=2
D3Z3F1	Fip1l1	0	0	2	0	0	0	0	4	0	0	NA	NA
E9QKK8	Atp11c	0	0	0	0	0	0	0	4	2	8	Carbamidomethylation	NA
F6Q8D3	Atp11c	0	0	0	0	0	0	0	4	0	8	Carbamidomethylation	NA
G3UYV7	Rps28	7	5	5	0	7	5	3	4	0	0	NA	40S ribosomal protein S28 (Fragment) OS=Mus musculus OX=10090 GN=Rps28 PE=1 SV=1
A0A3Q4EI12	Rab18	0	0	3	0	1	0	0	4	0	0	NA	NA
Z4YJD9	Krt12	7	0	4	0	5	0	0	4	2	6	NA	NA
E9PYU4	Chd5	0	0	0	0	0	0	0	4	0	0	NA	NA
A0A0R4J0Q5	Lmnb2	0	0	0	0	0	0	0	4	0	0	NA	NA
A0A1D5RLQ0	Nup93	6	2	0	0	0	3	0	4	1	0	NA	NA
Q9R1R8	Rdh11	0	0	2	0	0	0	0	3	2	0	NA	NA
A0A1D5RLU2	Psme3ip1	2	1	0	0	1	1	0	3	2	1	NA	NA
A0A1D5RLX7	Psme3ip1	2	0	0	0	1	1	0	3	2	1	NA	NA
A0A1D5RLW0	Psme3ip1	2	0	0	0	1	1	0	3	2	1	NA	NA
A0A0J9YUZ4	Hmgb1	0	0	0	0	1	0	0	3	0	0	NA	NA
A0A494BAD3	Cpt1a	0	0	0	0	0	0	0	3	0	5	Carbamidomethylation	NA
B1ASE2	Atp5pd	0	0	0	0	0	9	0	3	0	0	NA	NA
E9Q467	Abcc4	0	0	0	0	0	0	0	3	2	4	NA	NA
E9Q236	Abcc4	0	0	0	0	0	0	0	3	2	4	NA	NA
Z4YKT6	Dhrs7b	0	0	0	0	4	6	0	3	0	1	NA	NA
A0A0N4SVB8	Arl8b	0	0	1	0	0	0	0	3	1	0	NA	NA
A0A494BB95	Eif1a	0	0	1	0	0	0	0	3	0	0	NA	NA
Z4YLI8	Cluh	10	0	4	0	7	5	5	3	2	1	NA	Clustered mitochondria protein homolog OS=Mus musculus OX=10090 GN=Cluh PE=1 SV=1
F8WI65	Ahcyl2	3	0	0	0	2	2	0	3	2	0	NA	NA
F8WGT1	Ahcyl2	3	0	0	0	2	2	2	3	2	3	Acetylation (Protein N-term)	Adenosylhomocysteinase OS=Mus musculus OX=10090 GN=Ahcyl2 PE=1 SV=1
G3X9S2	Enpp1	0	0	0	0	0	0	0	3	0	0	NA	NA
A0A0R4J1Q7	Enpp1	0	0	0	0	0	0	0	3	0	0	NA	NA
E9Q798	Arf4	0	0	0	0	0	0	0	3	0	0	NA	NA
E9Q5D6	Ranbp9	14	6	2	0	10	8	15	3	3	3	Carbamidomethylation	Ran-binding protein 9 OS=Mus musculus OX=10090 GN=Ranbp9 PE=1 SV=1
A2AG68	Atp7a	0	0	1	0	0	0	0	3	1	3	NA	NA
Z4YNA9	AB124611	0	0	0	0	0	0	0	3	0	0	NA	NA
A0A0B4J1G2	AB124611	0	0	0	0	0	0	0	3	0	0	NA	NA
A0A2R8VJV3	Copz1	1	0	0	0	0	0	0	3	0	0	NA	NA
E9QJS1	Tyk2	0	0	0	0	0	0	0	3	1	5	NA	NA
Q5SW16	Pafah1b1	0	0	0	0	0	0	0	3	0	0	NA	NA
F6QHF1	Tap1	2	0	0	0	0	0	0	2	0	1	NA	NA
Q3TBA3	Tap1	2	0	0	0	4	2	0	2	0	1	NA	NA
A0A075B5N9	Igkv3-7	1	1	0	0	0	1	0	2	2	2	NA	NA
A0A0G2JE31	Igkv3-7	1	1	0	0	0	1	0	2	2	2	NA	NA
O09048	1110025L11Rik	0	0	0	0	0	0	0	2	0	0	NA	NA
D6RE33	Edc4	1	1	0	0	0	0	0	2	1	0	NA	NA
A0A0R4J047	Luc7l	5	4	0	0	4	4	0	2	0	0	NA	NA
D3Z315	Cope	0	0	0	0	0	0	4	2	0	0	NA	Coatomer subunit epsilon (Fragment) OS=Mus musculus OX=10090 GN=Cope PE=1 SV=1
G3UXG7	Csnk2b	9	8	0	0	7	5	8	2	2	0	NA	Casein kinase II subunit beta OS=Mus musculus OX=10090 GN=Csnk2b PE=1 SV=1
G3UXU2	Csnk2b	0	0	0	0	0	5	0	2	2	0	NA	NA
A0A2R8W6K5	Rbfox1	0	0	2	0	0	0	0	2	2	1	NA	NA
A0A2I3BRA9	Rbfox2	0	0	2	0	0	0	0	2	2	1	NA	NA
A0A2I3BRU6	Rbfox2	0	0	2	0	0	0	0	2	2	1	NA	NA
A0A2K6EDK7	Rbfox2	0	0	2	0	0	0	0	2	2	1	NA	NA
A0A0U1RPX0	Exosc5	0	0	0	0	0	0	0	2	0	0	NA	NA
A0A0U1RPC2	Exosc5	0	0	0	0	0	0	0	2	0	0	NA	NA
E9QB02	Mars1	7	5	1	0	9	4	8	2	2	0	NA	Methionine--tRNA ligase cytoplasmic OS=Mus musculus OX=10090 GN=Mars PE=1 SV=1
D3YYR5	P2rx4	0	0	0	0	0	0	0	2	0	0	NA	NA
Q9Z256	P2rx4	0	0	0	0	0	0	0	2	0	0	NA	NA
D3Z5U5	P2rx4	0	0	0	0	0	0	0	2	0	0	NA	NA
A0A0A6YYE7	Igkv4-57	0	0	0	0	0	0	0	2	1	0	NA	NA
F7AA45	Rbm39	6	3	0	0	5	5	0	2	0	3	NA	NA
E9Q8F0	Rbm39	6	3	0	0	5	5	0	2	0	3	NA	NA
B1AYJ9	Ola1	0	2	0	0	0	0	0	2	0	0	NA	NA
F6RX08	Tpr	0	0	0	0	0	0	0	2	0	0	NA	NA
D6RIN4	Dynll2	0	0	2	0	0	0	0	2	0	0	NA	NA
Q8BJZ7	Thyn1	0	0	0	0	0	0	0	2	0	0	NA	NA
E9PWY7	Slc29a1	0	0	0	0	0	0	0	2	0	0	NA	NA
A0A1Y7VM54	Tmed10	0	2	2	0	5	2	0	2	2	0	NA	NA
F6TBV1	NA	1	1	0	0	2	0	0	2	1	0	NA	NA
F6WHL0	NA	1	1	0	0	2	0	0	2	0	0	NA	NA
A2ADH1	Magt1	1	1	0	0	2	0	0	2	0	0	NA	NA
A0A0J9YUQ8	Gsn	0	0	0	0	0	0	0	2	0	0	NA	NA
E9PUR2	Myo18a	11	11	1	0	12	13	5	2	0	2	NA	Unconventional myosin-XVIIIa (Fragment) OS=Mus musculus OX=10090 GN=Myo18a PE=1 SV=2
D6REU0	Mindy3	0	0	0	0	0	0	0	2	4	0	NA	NA
A0A494BAJ5	Ccs	0	0	0	0	0	0	1	2	1	0	NA	Superoxide dismutase [Cu-Zn] OS=Mus musculus OX=10090 GN=Ccs PE=1 SV=1
A0A494BB58	Ccs	0	0	1	0	0	0	1	2	1	0	NA	Copper chaperone for superoxide dismutase OS=Mus musculus OX=10090 GN=Ccs PE=1 SV=1
A0A494BBF1	Ccs	0	0	0	0	0	0	1	2	1	0	NA	Copper chaperone for superoxide dismutase OS=Mus musculus OX=10090 GN=Ccs PE=1 SV=1
A0A0R4J0X5	Serpina1c	0	0	0	0	0	0	0	2	0	0	NA	NA
A0A0A0MQA3	Serpina1a	0	0	0	0	0	0	0	2	0	0	NA	NA
Q3UL50	Wdr74	0	0	0	0	0	0	0	2	0	0	NA	NA
B1AT92	Grb2	0	0	2	0	0	0	0	2	4	9	Carbamidomethylation	NA
A0A1B0GS30	Ric8a	1	0	0	0	1	0	0	2	0	0	NA	NA
A0A1L1ST61	Higd1a	0	0	1	0	0	0	0	2	0	0	NA	NA
A0A087WQR6	Tpp2	0	0	0	0	0	0	0	2	0	0	NA	NA
A0A0A0MQ97	Nccrp1	2	1	4	0	4	1	1	2	2	6	NA	F-box only protein 50 OS=Mus musculus OX=10090 GN=Nccrp1 PE=1 SV=1
A0A1W2P750	Ppp1r12a	0	0	0	0	0	0	0	2	0	0	NA	NA
G3X922	Dnajc13	8	4	0	0	3	4	0	2	0	0	NA	NA
D4AFX7	Dnajc13	8	4	0	0	3	4	0	2	0	0	NA	NA
A0A1B0GR64	Inppl1	0	0	0	0	0	0	0	2	0	0	NA	NA
A0A087WPT7	Inppl1	0	0	0	0	0	0	0	2	0	0	NA	NA
A0A140T8M4	Igkv8-19	0	0	0	0	0	0	0	2	3	0	NA	NA
A0A075B5N4	Igkv8-27	0	0	0	0	0	0	0	2	3	0	NA	NA
A0A140T8P7	Igkv8-21	0	0	0	0	0	0	0	2	3	0	NA	NA
A0A0G2JF28	Igkv8-27	0	0	0	0	0	0	0	2	3	0	NA	NA
A0A140T8M3	Igkv8-30	0	0	0	0	0	0	0	2	3	0	NA	NA
A0A0G2JFN8	Igkv8-19	0	0	0	0	0	0	0	2	3	0	NA	NA
F6W5Q8	Vta1	0	0	0	0	2	0	0	2	0	2	Acetylation (Protein N-term)	NA
Q68FM7	Arhgef11	0	0	0	0	0	0	0	2	0	0	NA	NA
E9Q0A3	Arhgef11	0	0	0	0	0	0	0	2	0	0	NA	NA
D3Z654	Lef1	0	0	0	0	0	0	0	2	0	0	NA	NA
Q8JZZ5	Pitpnb	2	0	4	0	0	0	0	2	4	0	NA	NA
A0A0U1RP47	Cbl	0	0	0	0	0	0	0	2	0	0	NA	NA
E9QPU2	Dnah12	3	0	1	0	0	0	0	2	0	0	NA	NA
A0A1W2P6E3	Stx11	0	0	0	0	0	0	0	2	0	0	NA	NA
A0A1W2P6Y3	Stx11	0	0	0	0	0	0	0	2	0	0	NA	NA
A0A286YD76	Macf1	0	0	0	0	0	0	0	2	0	0	NA	NA
A2AS44	Pkp4	0	0	0	0	0	0	0	2	1	0	NA	NA
A2AS45	Pkp4	0	0	0	0	0	0	0	2	1	0	NA	NA
A0A2R8VJM7	Tmem106c	0	0	0	0	0	0	0	1	0	0	NA	NA
A2AQA7	Aqr	30	20	0	0	18	13	15	1	0	0	NA	RNA helicase aquarius OS=Mus musculus OX=10090 GN=Aqr PE=1 SV=1
A0A1B0GR84	Tmem160	1	0	0	0	1	0	0	1	0	0	NA	NA
A0A2R8VK76	Cpsf1	41	0	0	0	0	0	0	1	1	1	NA	NA
F6RJV6	Lancl2	2	0	0	0	3	0	4	1	0	0	NA	LanC-like protein 2 (Fragment) OS=Mus musculus OX=10090 GN=Lancl2 PE=1 SV=1
Q9D8L3	Ssr4	1	1	0	0	2	1	0	1	2	0	NA	NA
D3YZC2	Men1	0	0	0	0	2	0	0	1	0	0	NA	NA
F8WHD9	Men1	0	0	0	0	2	0	0	1	0	0	NA	NA
A0A0X1KG66	NA	1	0	0	0	0	0	0	1	0	0	NA	NA
F8WHY8	Mta1	8	6	0	0	10	7	6	1	0	1	NA	Metastasis-associated protein MTA1 OS=Mus musculus OX=10090 GN=Mta1 PE=1 SV=1
E9PX23	Mta1	8	6	0	0	10	7	6	1	0	1	NA	Metastasis-associated protein MTA1 OS=Mus musculus OX=10090 GN=Mta1 PE=1 SV=1
E9PUF7	Arhgef1	1	0	0	0	0	1	0	1	0	0	NA	NA
A0A0R4J0J8	Specc1l	1	0	1	0	4	2	0	1	0	0	NA	NA
E9PUH6	Crls1	1	0	0	0	0	0	0	1	0	0	NA	NA
A0A0G2JDN0	Ltf	0	0	0	0	0	1	0	1	0	0	NA	NA
A0A0G2JGN1	Ltf	0	0	0	0	0	1	0	1	0	0	NA	NA
A0A0G2JFM6	Ltf	0	0	0	0	0	1	0	1	0	0	NA	NA
B1AWD8	Clta	16	8	0	0	9	12	3	1	0	0	NA	Clathrin light chain OS=Mus musculus OX=10090 GN=Clta PE=1 SV=1
B1AWD9	Clta	16	8	0	0	9	12	3	1	0	1	NA	Clathrin light chain OS=Mus musculus OX=10090 GN=Clta PE=1 SV=1
A2AEN9	Gm5938	0	0	0	0	0	0	0	1	0	0	NA	NA
G5E8R4	Ppp6r3	3	2	0	0	5	3	1	1	0	0	NA	SAPS domain family member 3 isoform CRA_c OS=Mus musculus OX=10090 GN=Ppp6r3 PE=1 SV=1
F6W2Q5	Eps15	0	0	0	0	0	0	0	1	0	0	NA	NA
S4R2U7	Celf2	0	2	0	0	2	0	0	1	1	0	NA	NA
S4R1S7	Celf2	0	2	0	0	2	1	0	1	1	0	NA	NA
A0A140T8N2	NA	0	0	0	0	0	0	0	1	0	1	NA	NA
A0A087WP78	Neurl3	0	0	0	0	0	0	0	1	0	0	NA	NA
G3X9U9	Fis1	0	0	0	0	0	0	0	1	1	0	NA	NA
A0A1L1SRL0	Sltm	0	0	0	0	0	0	0	1	0	0	NA	NA
F7B6X4	Atxn2	0	0	0	0	0	0	0	1	0	0	NA	NA
F6V8M6	Atxn2	0	0	0	0	0	0	0	1	0	0	NA	NA
F6U2C2	Atxn2	0	0	0	0	0	0	0	1	0	0	NA	NA
A0A140LJE2	Tpcn2	0	0	0	0	0	0	0	1	0	0	NA	NA
A0A140LHT5	Tpcn2	0	0	0	0	0	0	0	1	0	0	NA	NA
A0A140LJI3	Tpcn2	0	0	0	0	0	0	0	1	0	0	NA	NA
A0A140LIA1	Tpcn2	0	0	0	0	0	0	0	1	0	0	NA	NA
A0A0A6YWP6	Atp6v1h	3	0	0	0	0	2	0	1	0	0	NA	NA
A0A0A6YX18	Atp6v1h	0	5	0	0	8	0	0	1	0	6	Carbamidomethylation	NA
A0A0R4J1A0	Btla	0	0	1	0	0	0	0	1	0	2	NA	NA
E9QNY6	Btla	0	0	1	0	0	0	0	1	0	2	NA	NA
A0A0A6YW07	Impa1	0	0	0	0	0	0	0	1	0	1	NA	NA
Q80ZJ2	Impa1	0	0	0	0	0	0	0	1	0	0	NA	NA
Q924B0	Impa1	0	0	0	0	0	0	3	1	0	0	NA	Inositol-1-monophosphatase OS=Mus musculus OX=10090 GN=Impa1 PE=1 SV=1
D3Z3R3	Dtymk	0	0	0	0	0	0	0	1	1	0	NA	NA
A0A075B5M7	Igkv5-39	0	0	0	0	0	0	0	1	0	1	NA	NA
A0A0B4J1J1	Igkv5-45	0	0	0	0	0	0	0	1	0	1	NA	NA
A0A0B4J1J2	Igkv5-43	0	0	0	0	0	0	0	1	0	1	NA	NA
A0A0G2JDV4	Igkv5-39	0	0	0	0	0	0	0	1	0	1	NA	NA
A2A6T4	Mrpl58	0	0	0	0	0	0	0	1	0	0	NA	NA
A0A1Y7VMS4	Nol7	0	0	0	0	0	0	0	1	1	0	NA	NA
A2AP78	Hmgb3	0	0	0	0	0	0	0	1	0	0	NA	NA
G3UX35	Smarca4	0	0	0	0	0	0	0	1	0	0	NA	NA
A0A1Y7VKX7	Ddx24	5	5	0	0	5	5	3	1	1	1	NA	ATP-dependent RNA helicase DDX24 OS=Mus musculus OX=10090 GN=Ddx24 PE=1 SV=1
F8WJA0	Ddx24	5	5	0	0	5	5	3	1	1	1	NA	ATP-dependent RNA helicase DDX24 OS=Mus musculus OX=10090 GN=Ddx24 PE=1 SV=1
D3Z5I1	Zc3hav1	7	4	0	0	5	7	2	1	0	0	NA	Zinc finger CCCH-type antiviral protein 1 OS=Mus musculus OX=10090 GN=Zc3hav1 PE=1 SV=1
B9EJ54	Nup205	1	2	0	0	1	3	0	1	0	0	NA	NA
A0A0J9YUD5	Nup205	1	2	0	0	1	3	0	1	0	0	NA	NA
D4AFX6	Acap2	23	14	0	0	23	22	14	1	3	4	NA	Arf-GAP with coiled-coil ANK repeat and PH domain-containing protein 2 OS=Mus musculus OX=10090 GN=Acap2 PE=1 SV=1
B7ZNU9	Sntb2	0	0	0	0	0	0	0	1	0	0	NA	NA
B0R091	Chp1	0	0	0	0	0	0	0	1	0	0	NA	NA
Q6DFW5	Atp11b	0	0	0	0	0	0	0	1	0	1	Carbamidomethylation	NA
B1AWH6	Smc2	0	0	2	0	0	0	0	1	0	0	NA	NA
A0A0U1RNL9	Maz	4	5	0	0	7	4	10	1	1	2	NA	Myc-associated zinc finger protein OS=Mus musculus OX=10090 GN=Maz PE=1 SV=1
Q9Z1R9	Prss1	0	0	0	0	3	0	0	1	1	0	NA	NA
D3Z687	0610010K14Rik	0	0	0	0	1	1	0	1	0	0	NA	NA
F7A3Q3	Mark2	0	0	0	0	0	0	0	1	0	0	NA	NA
H3BKM0	Ap2b1	0	0	3	0	0	1	0	1	1	1	Carbamidomethylation	NA
A0A0R4J174	Ecsit	0	0	0	0	0	2	0	1	0	0	NA	NA
J3KMM6	Ecsit	0	0	0	0	0	2	0	1	0	0	NA	NA
A0A494BBA3	Abhd17b	0	0	0	0	0	0	0	1	0	0	NA	NA
H3BJJ9	Zc3h18	0	0	0	0	0	0	0	1	0	0	NA	NA
D3YYR4	Hk1	1	0	0	0	0	1	0	1	0	0	NA	NA
A0A1Y7VLP0	Atp5mj	0	0	0	0	0	0	0	1	0	0	NA	NA
J3QJV7	Rabep1	0	0	0	0	0	0	0	1	0	1	NA	NA
F6VNW5	Gclm	0	1	0	0	0	0	0	1	0	0	NA	NA
H3BJA3	Gclm	0	1	0	0	0	0	0	1	0	0	NA	NA
A0A1B0GSH8	Gm45808	0	0	0	0	0	0	0	1	0	0	NA	NA
E9PYI7	Lmo7	44	0	0	0	29	31	25	1	0	2	NA	LIM domain only 7 OS=Mus musculus OX=10090 GN=Lmo7 PE=1 SV=1
F6VG99	Lmo7	0	0	0	0	0	0	0	1	0	2	NA	NA
E9PYF4	Lmo7	0	0	0	0	0	0	0	1	0	0	NA	NA
G3X8U7	Ppp3cb	1	1	0	0	0	0	0	1	0	0	NA	NA
E0CZ78	Ppp3cb	1	1	0	0	0	1	0	1	0	0	NA	NA
E9Q035	NA	0	1	0	0	0	1	0	1	0	1	NA	NA
F6SGV3	Pdcd2l	0	0	0	0	0	0	0	1	1	0	NA	NA
Q05BF0	Chchd1	0	0	0	0	3	0	0	1	1	0	NA	NA
A0A140T8P9	Igkv14-111	0	0	0	0	0	0	0	1	0	2	Oxidation (M)	NA
A0A075B5K0	Igkv14-126	0	0	0	0	0	0	0	1	0	0	NA	NA
A2AJK8	Ttc1	3	1	0	0	1	2	2	1	0	0	NA	Tetratricopeptide repeat protein 1 OS=Mus musculus OX=10090 GN=Ttc1 PE=1 SV=1
Q3TIR6	Vbp1	0	0	0	0	0	0	1	1	0	0	NA	Prefoldin subunit 3 OS=Mus musculus OX=10090 GN=Vbp1 PE=1 SV=1
G3X8R5	Qrich1	0	0	0	0	0	0	0	1	0	0	NA	NA
D3Z285	Nfu1	0	0	0	0	0	0	0	1	0	0	NA	NA
A0A1Y7VN19	Dhrs7	0	0	0	0	0	0	0	1	0	0	NA	NA
A2A4P4	Gm27029	0	0	0	0	0	0	0	1	1	0	NA	NA
A2AEB8	Morf4l2	0	0	0	0	0	0	0	1	0	0	NA	NA
A2AEB7	Morf4l2	0	0	0	0	0	0	0	1	0	0	NA	NA
A2AEB6	Morf4l2	0	0	0	0	0	1	0	1	0	0	NA	NA
A2AEB5	Morf4l2	0	0	0	0	0	0	0	1	0	0	NA	NA
A2AEB4	Morf4l2	0	0	0	0	0	0	0	1	0	0	NA	NA
A2AEB3	Morf4l2	0	0	0	0	0	0	0	1	0	0	NA	NA
A0A0A0MQ73	Kmt2d	0	0	0	0	0	0	0	1	0	0	NA	NA
A0A494B9L7	Atad1	1	1	1	0	2	1	0	1	0	0	NA	NA
A0A494B9Y0	Atad1	1	1	1	0	2	1	0	1	0	1	NA	NA
A0A087WS92	Hdlbp	0	0	1	0	0	0	0	1	0	0	NA	NA
A0A087WNP6	Cdv3	0	0	0	0	0	0	0	1	1	0	NA	NA
E9PVK4	Ttc21b	3	0	1	0	0	0	0	1	0	3	NA	NA
S4R2D2	Gga3	0	0	0	0	0	0	0	1	0	1	NA	NA
A2A9W7	Gga3	0	0	0	0	0	0	0	1	0	1	NA	NA
A0A494BAM4	Rrp1b	0	0	0	0	0	0	0	1	0	0	NA	NA
Q3U4W8	Usp5	0	0	0	0	3	0	0	1	0	0	NA	NA
A0A0G2JGD5	Snx27	0	0	0	0	0	1	0	1	0	0	NA	NA
D3Z494	Akr1b10	0	0	0	0	0	0	0	1	0	0	NA	NA
G5E895	Akr1b10	0	0	0	0	0	0	0	1	0	0	NA	NA
A0A1Y7VLH1	Akr1c21	0	0	0	0	0	0	0	1	0	0	NA	NA
Q91WT7	Akr1c14	0	0	0	0	0	0	0	1	0	0	NA	NA
G3X9Y6	Akr1c19	0	0	0	0	0	0	0	1	0	0	NA	NA
D3Z3Y4	Tial1	1	0	0	0	0	2	0	1	0	0	NA	NA
Q921W2	Tial1	1	0	1	0	0	2	0	1	1	0	NA	NA
Q8CII5	Tia1	1	0	0	0	0	2	0	1	1	0	NA	NA
G5E8L2	Tia1	1	0	0	0	0	2	0	1	1	0	NA	NA
Q80ZW7	Tia1	1	0	0	0	0	2	0	1	1	0	NA	NA
A0A0N4SW78	Tia1	1	0	0	0	0	0	0	1	0	0	NA	NA
A0A0U1RPE1	Tial1	1	0	0	0	0	0	0	1	0	0	NA	NA
A0A0U1RPD3	Tial1	1	0	0	0	0	0	0	1	0	0	NA	NA
D3Z4H6	Tia1	1	0	0	0	1	0	0	1	1	0	NA	NA
A0A0R4J0F6	Gak	0	1	0	0	0	0	0	1	0	0	NA	NA
F6SLK1	Gak	0	0	0	0	0	0	0	1	0	0	NA	NA
A0A0U1RPX7	Myo7a	0	0	0	0	0	0	0	1	0	0	NA	NA
A0A0R4J113	Myo7a	0	0	0	0	0	0	0	1	0	0	NA	NA
Q5MJ56	Myo7a	0	0	0	0	0	0	0	1	0	0	NA	NA
A8Y5I3	Rad50	0	0	1	0	0	0	0	1	2	0	NA	NA
A2A817	Park7	0	0	0	0	0	0	0	1	0	0	NA	NA
A2A816	Park7	0	0	0	0	0	0	0	1	0	0	NA	NA
A0A286YCB8	Camk2g	0	0	0	0	0	0	0	1	0	0	NA	NA
A0A286YDL6	Camk2g	0	0	0	0	0	0	0	1	0	0	NA	NA
G3UY65	Ccnb1	0	0	0	0	0	0	0	1	0	3	NA	NA
G3UYP1	Rragb	0	1	1	0	0	0	0	1	1	0	NA	NA
A0A0R4J1I6	Nup210	1	0	0	0	2	0	0	1	1	0	NA	NA
J3QNN5	Sccpdh	0	1	0	0	0	0	0	1	0	1	NA	NA
F7BX26	Ppp5c	0	0	0	0	0	0	2	1	1	1	Carbamidomethylation	Serine/threonine-protein phosphatase (Fragment) OS=Mus musculus OX=10090 GN=Ppp5c PE=1 SV=1
F8WI46	Tbl2	0	0	0	0	0	0	0	1	0	0	NA	NA
A2AVR9	Dynlrb1	0	0	0	0	0	2	0	1	0	0	NA	NA
Q8BUJ6	Ttn	0	0	1	0	0	0	0	1	0	0	NA	NA
A0A0R4J1G7	Eml4	0	0	0	0	0	0	0	1	0	0	NA	NA
A7ISP9	Eml4	0	1	0	0	2	1	1	1	0	0	NA	EMAP-like protein 4 OS=Mus musculus OX=10090 GN=Eml4 PE=1 SV=1
F8WJ93	Eml4	0	1	0	0	2	1	1	1	0	0	NA	Echinoderm microtubule-associated protein-like 4 OS=Mus musculus OX=10090 GN=Eml4 PE=1 SV=1
A0A1B0GS72	Cd37	0	0	0	0	0	0	0	1	0	0	NA	NA
Q3U1W9	Cd37	0	0	0	0	0	0	0	1	0	0	NA	NA
A0A1B0GSZ7	Cd37	0	0	0	0	0	0	0	1	0	0	NA	NA
Q3U429	Cd37	0	0	0	0	0	0	0	1	0	0	NA	NA
A0A087WQ60	Cops5	2	0	1	0	0	0	0	1	0	0	NA	NA
A0A087WQA8	Cops5	2	2	1	0	0	0	0	1	0	0	NA	NA
A2BFF5	Dync1i2	0	0	0	0	0	0	6	1	0	0	NA	Cytoplasmic dynein 1 intermediate chain 2 OS=Mus musculus OX=10090 GN=Dync1i2 PE=1 SV=1
A2A4N8	Nbr1	0	0	0	0	0	0	0	1	0	2	NA	NA
A2A4N7	Nbr1	0	0	0	0	0	0	0	1	0	2	NA	NA
F6QFL0	Chchd3	0	0	0	0	0	0	0	1	0	0	NA	NA
A0A1D5RLM8	Gm11639	0	0	0	0	0	0	0	1	1	0	NA	NA
A0A1W2P7W7	Tjp3	0	0	0	0	0	0	0	1	0	0	NA	NA
Q921G9	Tjp3	0	0	0	0	0	0	2	1	0	0	NA	Tight junction protein 3 OS=Mus musculus OX=10090 GN=Tjp3 PE=1 SV=1
A0A1W2P7L7	Sf3b6	0	0	3	0	0	0	0	1	2	0	NA	NA
A2AFM5	Apex2	0	0	0	0	0	0	0	1	0	0	NA	NA
E9QQ10	Akap9	0	0	0	0	0	0	0	1	0	0	NA	NA
F6U7V1	Ryr2	0	0	0	0	0	0	0	1	1	0	NA	NA
B1AXJ4	Lrp8	0	0	0	0	0	0	0	1	0	0	NA	NA
D3Z7P4	Gls	0	0	0	0	0	0	0	1	0	0	NA	NA
E9Q1A0	Pde4dip	0	0	0	0	0	0	0	1	0	0	NA	NA
G3X9L9	Pde4dip	0	0	0	0	0	0	0	1	0	0	NA	NA
E9Q3T3	Kif14	0	0	0	0	0	0	0	1	0	0	NA	NA
F8WI56	Dip2a	0	0	0	0	0	0	0	1	0	0	NA	NA
D3Z7D3	Dip2a	0	0	0	0	0	0	0	1	0	0	NA	NA
G3UZJ4	Prdx5	0	0	1	0	0	5	0	1	0	0	NA	NA
H3BJQ7	Prdx5	7	6	1	0	8	5	0	1	0	0	NA	NA
A0A494BAZ4	Prdx5	0	0	1	0	0	0	0	1	0	0	NA	NA
A0A0A6YX96	Fpgs	0	0	0	0	0	0	0	1	0	0	NA	NA
A0A338P735	Smpd4	0	0	0	0	0	0	0	1	0	0	NA	NA
D3YU17	Ncln	0	0	0	0	0	0	0	1	0	1	NA	NA
D3Z269	Lypla1	0	0	0	0	0	0	0	1	1	0	NA	NA
E9Q2X6	Smc4	14	4	0	0	9	7	2	1	0	3	NA	Structural maintenance of chromosomes protein OS=Mus musculus OX=10090 GN=Smc4 PE=1 SV=1
A0A0A6YXY3	Smc4	0	0	0	0	0	0	0	1	0	0	NA	NA
E9QP46	Syne2	0	0	0	0	1	0	0	1	0	0	NA	NA
A0A0R4J114	Utp25	0	0	0	0	0	0	0	1	0	0	NA	NA
A0A140LJ69	Unc13b	0	0	0	0	0	0	0	1	0	1	Acetylation (Protein N-term)	NA
A0A217FL83	Ccdc85c	3	0	0	0	0	0	2	1	0	1	NA	Coiled-coil domain-containing protein 85C OS=Mus musculus OX=10090 GN=Ccdc85c PE=1 SV=1
D3Z0V2	Arhgef7	0	0	0	0	1	0	0	1	0	0	NA	NA
A0A0R4J0X8	Arhgef7	0	0	0	0	0	0	0	1	0	0	NA	NA
G5E881	Tamm41	0	0	1	0	0	0	0	1	0	0	NA	NA
E9Q919	Dctn3	1	0	0	0	0	0	0	1	0	0	NA	NA
E9PYH2	Acot7	3	0	2	0	3	3	4	1	1	2	NA	Cytosolic acyl coenzyme A thioester hydrolase OS=Mus musculus OX=10090 GN=Acot7 PE=1 SV=1
Z4YJW0	Emc1	1	1	0	0	0	0	0	1	0	0	NA	NA
G3UXT6	Kpna1	0	0	0	0	0	0	0	1	0	1	Acetylation (Protein N-term)	NA
A0A140LIV1	Spef2	0	0	0	0	0	0	0	1	0	0	NA	NA
A2AW03	P2rx3	0	0	1	0	0	0	0	1	0	0	NA	NA
A2AW04	P2rx3	0	0	1	0	0	0	0	1	0	0	NA	NA
E9PX84	Dab2	0	0	0	0	0	0	0	1	0	0	NA	NA
F6TQN9	Dab2	0	0	0	0	0	0	0	1	0	0	NA	NA
E9QL31	Dab2	0	0	0	0	0	0	0	1	0	0	NA	NA
A0A0R4J104	Dab2	0	0	0	0	0	0	0	1	0	0	NA	NA
A0A1L1SV25	Actn4	0	0	295	0	224	0	0	0	132	0	NA	NA
Q80XR6	Hnrnpab	46	39	0	0	55	47	47	0	39	19	Carbamidomethylation; Oxidation (M)	Heterogeneous nuclear ribonucleoprotein A/B OS=Mus musculus OX=10090 GN=Hnrnpab PE=1 SV=1
A0A0N4SV66	H2aj	26	17	23	0	26	19	4	0	35	8	NA	Histone H2A OS=Mus musculus OX=10090 GN=H2afj PE=1 SV=1
Q8CGP4	H2ac1	26	17	23	0	26	19	4	0	35	8	NA	Histone H2A OS=Mus musculus OX=10090 GN=Hist1h2aa PE=1 SV=1
D3YVM2	Tmem59	0	11	33	0	14	0	9	0	39	0	NA	Transmembrane protein 59 OS=Mus musculus OX=10090 GN=Tmem59 PE=1 SV=1
D3YTP0	Steap3	3	0	0	0	4	5	0	0	23	0	NA	NA
Q8K4L2	Svil	0	0	9	0	0	0	0	0	17	5	NA	NA
A0A140T8M9	Igkv1-122	0	0	14	0	0	0	0	0	21	58	Carbamidomethylation	NA
K3W4R2	Myh14	59	46	0	0	50	56	25	0	11	8	NA	Myosin-14 OS=Mus musculus OX=10090 GN=Myh14 PE=1 SV=1
B1AU76	Nasp	2	2	0	0	4	3	5	0	9	2	NA	Nuclear autoantigenic sperm protein OS=Mus musculus OX=10090 GN=Nasp PE=1 SV=1
A0A0G2JG00	Fubp1	0	0	10	0	0	0	13	0	8	0	NA	Far upstream element-binding protein 1 OS=Mus musculus OX=10090 GN=Fubp1 PE=1 SV=1
Q5SWU0	Ikzf1	0	0	0	0	0	0	0	0	5	5	NA	NA
E9PX68	Slc4a1ap	69	0	16	0	56	52	54	0	13	16	Carbamidomethylation; Oxidation (M)	Solute carrier family 4 (anion exchanger) member 1 adaptor protein OS=Mus musculus OX=10090 GN=Slc4a1ap PE=1 SV=1
A0A0A6YX26	Rpl31	0	0	8	0	0	0	4	0	7	4	NA	60S ribosomal protein L31 OS=Mus musculus OX=10090 GN=Rpl31 PE=1 SV=1
Q3THM8	Emd	0	2	0	0	0	0	0	0	2	0	NA	NA
I7HJS1	Emd	5	2	0	0	5	0	0	0	2	0	NA	NA
B7FAU5	Emd	0	2	0	0	0	0	0	0	2	0	NA	NA
A0A338P776	Atp5po	0	0	6	0	0	0	2	0	5	0	NA	ATP synthase H+-transporting mitochondrial F1 complex O subunit (Fragment) OS=Mus musculus OX=10090 GN=Atp5o PE=1 SV=1
A0A494BAY0	Vps37c	0	0	0	0	0	0	0	0	3	1	NA	NA
A0A494BAR3	Vps37c	0	0	0	0	0	0	0	0	3	1	NA	NA
Q6XLQ8	Calu	0	0	4	0	3	3	0	0	4	0	NA	NA
Q3ULB0	Rbm6	0	0	3	0	0	0	0	0	5	4	NA	NA
F6YFR7	Cope	0	0	2	0	0	0	0	0	2	0	NA	NA
A0A1L1SVD8	Cwc15	0	0	4	0	0	0	0	0	3	0	NA	NA
E0CZE1	Arrdc3	0	0	0	0	0	0	0	0	2	0	NA	NA
F6WMY5	Adgrl3	0	0	0	0	0	0	0	0	3	0	NA	NA
D3Z5B1	Zbed5	1	0	0	0	0	1	0	0	3	0	NA	NA
H3BKF6	Cux1	0	1	0	0	1	0	0	0	2	0	NA	NA
Q5SQG5	Phb1	0	0	0	0	0	0	0	0	2	0	NA	NA
Q6P5B5	Fxr2	23	13	0	0	23	21	22	0	3	0	NA	Fragile X mental retardation syndrome-related protein 2 OS=Mus musculus OX=10090 GN=Fxr2 PE=1 SV=1
A0A023T778	Magohb	0	7	3	0	12	4	0	0	3	0	NA	NA
S4R1Y5	Rpf2	0	0	3	0	0	0	0	0	3	1	NA	NA
D3Z7Q5	Pdcd5	0	0	0	0	0	0	0	0	3	0	NA	NA
A0A0G2JF13	Crlf2	0	0	4	0	0	0	0	0	2	3	NA	NA
D3Z0B9	Aldh16a1	3	3	0	0	0	3	3	0	2	3	NA	Aldehyde dehydrogenase family 16 member A1 OS=Mus musculus OX=10090 GN=Aldh16a1 PE=1 SV=3
Q6PFA2	Clta	16	8	0	0	9	12	3	0	1	0	NA	Clathrin light chain OS=Mus musculus OX=10090 GN=Clta PE=1 SV=1
A0A1D5RM85	Rpl18a	0	0	0	0	0	0	0	0	2	4	Carbamidomethylation	NA
A0A1D5RME4	Rpl18a	0	0	0	0	0	0	0	0	2	0	NA	NA
A0A1L1SRT0	NA	1	0	0	0	0	0	1	0	2	0	NA	BAG family molecular chaperone regulator 1 OS=Mus musculus OX=10090 GN=Bag1 PE=1 SV=1
G5E8T3	Srp19	1	0	0	0	0	0	0	0	1	0	NA	NA
Q9D104	Srp19	1	0	0	0	0	0	0	0	1	0	NA	NA
A0A338P786	Ube2l3	0	0	0	0	0	0	0	0	2	0	NA	NA
D3Z191	Tmem106b	0	0	0	0	0	0	0	0	2	5	Carbamidomethylation	NA
E9Q4G7	Csnk1a1	3	2	0	0	3	2	1	0	1	5	NA	Casein kinase I isoform alpha OS=Mus musculus OX=10090 GN=Csnk1a1 PE=1 SV=1
E9Q3W1	Csnk1a1	3	0	1	0	3	0	0	0	1	5	NA	NA
E9PWB2	Csnk1a1	3	0	0	0	3	2	0	0	1	5	NA	NA
F6YBC9	Csnk1a1	0	0	0	0	0	0	0	0	1	0	NA	NA
A0A0G2JGX3	Atp5pb	0	0	1	0	0	0	0	0	2	0	NA	NA
Q3TPM3	Cul1	0	0	2	0	0	12	0	0	2	7	Oxidation (M)	NA
A0A0G2JEC4	Sh3glb1	0	0	0	0	0	0	0	0	2	0	NA	NA
G3UY43	Dnmt3a	0	0	0	0	0	1	0	0	1	0	NA	NA
A0A140LHC3	Qars1	0	0	0	0	0	0	0	0	2	0	NA	NA
A0A1W2P7R1	Nup107	3	0	0	0	3	2	0	0	1	0	NA	NA
E9Q5H2	Anp32e	0	0	0	0	0	0	0	0	1	0	NA	NA
E9PZF5	Anp32e	0	0	0	0	0	0	0	0	1	0	NA	NA
Q8BNQ4	Sp2	0	1	0	0	0	0	0	0	1	1	NA	NA
Q8CE80	Cast	0	0	2	0	0	0	0	0	1	0	NA	NA
A0A3Q4EHN7	Wdr43	0	0	0	0	2	0	0	0	3	0	NA	NA
A2A4N5	Nbr1	0	0	0	0	0	0	0	0	2	2	NA	NA
D3Z0L4	Chchd3	0	11	0	0	0	0	0	0	3	0	NA	NA
D3Z2E8	Calhm2	0	0	2	0	0	0	0	0	2	1	NA	NA
F6SQH7	Poldip2	3	0	2	0	5	0	7	0	1	3	NA	Polymerase delta-interacting protein 2 (Fragment) OS=Mus musculus OX=10090 GN=Poldip2 PE=1 SV=1
A2A7S7	Yars1	3	2	0	0	1	1	0	0	2	0	NA	NA
Q14B01	Rnf113a2	6	4	0	0	7	6	10	0	1	0	NA	Ring finger protein 113A2 OS=Mus musculus OX=10090 GN=Rnf113a2 PE=1 SV=1
Q8R3P8	Rnf113a1	0	0	0	0	0	0	0	0	1	0	NA	NA
F2Z490	Dgke	3	2	1	0	3	1	0	0	1	2	NA	NA
A0A2I3BS49	Timm23	1	0	0	0	0	0	0	0	1	0	NA	NA
Q9CXU4	Timm23	1	0	0	0	0	0	0	0	1	0	NA	NA
Q3UID0	Smarcc2	15	13	0	0	14	12	0	0	1	0	NA	NA
E9Q9B3	Spryd3	0	0	1	0	0	0	0	0	1	1	NA	NA
S4R1V0	Pdlim1	0	2	0	0	0	0	0	0	2	0	NA	NA
E9PY26	Blmh	6	0	2	0	0	0	2	0	2	0	NA	Bleomycin hydrolase (Fragment) OS=Mus musculus OX=10090 GN=Blmh PE=1 SV=1
A0A2I3BQE0	Stk3	0	0	2	0	0	0	0	0	1	1	NA	NA
F7DAY5	Rprd1b	0	0	0	0	0	0	0	0	1	0	NA	NA
A0A2R8W6R3	Rbx1	0	0	0	0	0	0	0	0	3	0	NA	NA
A2AUM6	Srp14	2	0	0	0	0	0	0	0	1	0	NA	NA
A0A2R8VHR6	Krt80	0	1	2	0	0	0	0	0	1	0	NA	NA
Q3TBQ1	Krt80	0	1	0	0	0	0	0	0	1	0	NA	NA
Q91XW9	Pcdhgc5	0	0	0	0	0	0	0	0	2	3	NA	NA
H9H9R6	Ryk	0	0	0	0	0	0	0	0	1	0	NA	NA
Z4YLT8	Rnf11	0	0	0	0	0	0	0	0	1	0	NA	NA
A0A0R4J0B2	Plbd1	2	0	0	0	0	0	1	0	1	1	NA	Phospholipase B-like OS=Mus musculus OX=10090 GN=Plbd1 PE=1 SV=1
A0A0A6YY08	Qars1	0	0	0	0	0	0	0	0	3	0	NA	NA
A0A0R4IZX6	Ap1m2	0	0	0	0	0	0	0	0	1	0	NA	NA
A0A0R4J1L4	Ap1m2	0	0	0	0	0	0	0	0	1	0	NA	NA
A0A1L1SUA0	Ap1m2	0	0	0	0	0	0	0	0	1	0	NA	NA
Q58EV3	Mup7	0	0	3	0	2	3	1	0	1	0	NA	Major urinary protein 1 OS=Mus musculus OX=10090 GN=Mup7 PE=2 SV=1
Z4YLD0	Steep1	0	0	0	0	0	0	0	0	1	0	NA	NA
D6RE20	Selenoi	0	0	0	0	0	0	0	0	1	0	NA	NA
Q8CET7	Selenoi	0	0	0	0	0	0	0	0	1	0	NA	NA
G3UVV4	Hk1	1	2	1	0	1	1	0	0	1	0	NA	NA
M0QWS4	Ufc1	0	0	0	0	0	0	0	0	1	0	NA	NA
A9C437	Clcn2	0	0	0	0	0	0	0	0	1	0	NA	NA
A0A338P673	Clcn2	0	0	0	0	0	0	0	0	1	2	Acetylation (Protein N-term); Oxidation (M)	NA
E0CYU9	Znrd2	0	0	1	0	0	0	0	0	1	0	NA	NA
A0A0A6YVU0	Atp6v1h	0	0	0	0	0	0	0	0	1	0	NA	NA
F6XC15	Flna	0	0	1	0	0	0	0	0	1	0	NA	NA
D3YW98	Vps29	0	0	2	0	0	0	0	0	2	0	NA	NA
D3YYD5	Vps29	0	0	2	0	0	0	0	0	2	0	NA	NA
D3Z645	Vps29	0	0	2	0	0	0	0	0	2	0	NA	NA
A0A0A6YXI9	Zc3h11a	0	0	0	0	0	0	0	0	1	0	NA	NA
F6YZZ8	Lrp8	0	0	0	0	0	0	0	0	1	0	NA	NA
B1AXJ6	Lrp8	0	0	0	0	0	0	0	0	1	0	NA	NA
D3Z5N6	Dpf2	1	0	0	0	3	2	0	0	1	0	NA	NA
F8WIP7	Dpf2	0	0	0	0	3	2	0	0	1	0	NA	NA
A0A494BBF7	Dpf2	1	0	0	0	3	2	0	0	1	0	NA	NA
E9QKK1	Cenpe	0	0	0	0	0	0	0	0	1	0	NA	NA
A2AWN8	Ythdf1	0	0	0	0	0	0	0	0	1	0	NA	NA
Q6P1J1	Crmp1	0	0	1	0	0	0	0	0	1	0	NA	NA
Q3TT92	Dpysl3	0	0	0	0	0	0	0	0	1	0	NA	NA
A2AQE4	Cops2	0	0	0	0	0	0	0	0	1	0	NA	NA
E9QA47	Celf2	0	2	0	0	2	0	0	0	1	0	NA	NA
S4R2J2	Celf2	0	2	0	0	2	0	0	0	1	0	NA	NA
S4R2L5	Celf2	0	2	0	0	2	0	0	0	1	0	NA	NA
A3KGT0	Celf2	0	2	0	0	2	0	0	0	1	0	NA	NA
A0A0R4J2B0	Celf2	0	2	0	0	2	0	0	0	1	0	NA	NA
V9GX43	Celf2	0	2	0	0	2	0	0	0	1	0	NA	NA
S4R2U1	Celf2	0	2	0	0	0	0	0	0	1	0	NA	NA
E9Q6W2	Coa3	0	0	0	0	0	0	0	0	1	0	NA	NA
A0A1L1SRR1	Cmtm7	0	0	0	0	0	0	0	0	1	0	NA	NA
F6U415	Smarcb1	0	0	0	0	0	0	0	0	1	0	NA	NA
D3YXD3	Prkrip1	0	0	0	0	0	0	0	0	1	0	NA	NA
G5E837	Hcfc2	0	0	0	0	0	0	0	0	1	0	NA	NA
E9PY85	Rsl24d1	0	0	0	0	0	0	0	0	1	0	NA	NA
Q5U4H9	Ncoa4	0	0	0	0	0	0	0	0	1	1	NA	NA
Q8BHX6	Noc2l	2	0	0	0	2	0	0	0	1	1	NA	NA
J3QK52	Noc2l	0	0	0	0	2	0	1	0	1	1	NA	Nucleolar complex protein 2 homolog OS=Mus musculus OX=10090 GN=Noc2l PE=1 SV=1
Q5FWJ7	Vti1a	0	0	0	0	0	0	0	0	2	0	NA	NA
D3YY55	Sap18	0	0	0	0	0	0	0	0	2	0	NA	NA
A0A0G2JGP4	Nras	0	0	0	0	1	0	0	0	1	0	NA	NA
Q9D091	Nras	0	0	0	0	1	0	0	0	1	0	NA	NA
A0A0G2JE25	Nras	0	0	0	0	1	0	0	0	1	0	NA	NA
A0A3B2WB12	Mea1	0	0	0	0	0	0	0	0	1	0	NA	NA
F7CVW0	Sbno1	0	0	1	0	0	1	0	0	1	0	NA	NA
B2RRI2	Sbno1	0	0	0	0	0	1	0	0	1	0	NA	NA
F7CG42	Pus7	0	0	0	0	0	2	0	0	1	0	NA	NA
A0A1Y7VLY3	Cpsf3	0	0	1	0	0	0	0	0	1	0	NA	NA
G3UW94	U2af1	0	0	0	0	0	0	0	0	1	0	NA	NA
A0A0G2JED9	Rap1a	0	0	1	0	0	0	0	0	1	0	NA	NA
A0A0N4SVR8	Tia1	0	0	0	0	0	0	0	0	1	0	NA	NA
A0A0N4SUX1	Tia1	0	0	0	0	0	0	0	0	1	0	NA	NA
D6RGU1	Tial1	0	0	0	0	0	0	0	0	1	0	NA	NA
D3YY02	Tia1	0	0	0	0	0	0	0	0	1	0	NA	NA
D6RFA7	Carm1	0	0	0	0	0	0	0	0	1	0	NA	NA
A0A494B970	Glo1	0	0	0	0	0	0	0	0	1	0	NA	NA
A0A494BAF7	Glo1	0	0	0	0	0	0	0	0	1	0	NA	NA
A0A494BBE7	Glo1	0	0	0	0	0	0	0	0	1	0	NA	NA
F7BEQ1	Slc45a4	0	0	0	0	0	0	0	0	1	8	Oxidation (M)	NA
A2AJH3	Nmt2	0	0	2	0	0	0	0	0	1	0	NA	NA
H3BKZ0	Zwilch	0	0	0	0	0	0	0	0	1	0	NA	NA
H3BJ52	Zwilch	0	0	0	0	0	4	0	0	1	0	NA	NA
G3X9Z0	Zwilch	2	0	0	0	0	4	0	0	1	0	NA	NA
D3YUG4	Lypla1	0	0	0	0	0	0	0	0	1	0	NA	NA
J3QP56	Lypla1	0	0	0	0	0	0	0	0	1	0	NA	NA
D3Z111	Lypla1	0	0	0	0	0	0	0	0	1	0	NA	NA
D3YTP4	Scamp1	0	0	0	0	0	0	0	0	1	0	NA	NA
D3Z2B4	Xpr1	0	0	0	0	0	0	0	0	1	2	NA	NA
Q3UTY5	Rpgr	0	0	0	0	0	0	0	0	1	0	NA	NA
E9QNZ2	Dzip3	0	0	0	0	1	0	0	0	1	0	NA	NA
Q9QUK9	Try5	0	0	0	0	0	0	0	0	1	0	NA	NA
Q9R0T7	Try4	0	0	0	0	0	0	0	0	1	0	NA	NA
E9Q175	Myo6	8	5	1	0	10	7	3	0	1	0	NA	Unconventional myosin-VI OS=Mus musculus OX=10090 GN=Myo6 PE=1 SV=1
E9PVU0	Myo6	8	5	0	0	10	7	3	0	1	0	NA	Unconventional myosin-VI OS=Mus musculus OX=10090 GN=Myo6 PE=1 SV=1
E9Q3L1	Myo6	0	0	0	0	0	0	0	0	1	0	NA	NA
E9Q174	Myo6	0	0	0	0	0	0	0	0	1	0	NA	NA
V9GXM4	Myo6	0	0	0	0	0	0	0	0	1	0	NA	NA
V9GX76	Myo6	0	0	0	0	0	0	0	0	1	0	NA	NA
A0A171EBL2	Rnf213	0	0	0	0	0	0	0	0	1	0	NA	NA
A0A0B4J1I4	Igkv4-72	0	0	0	0	0	0	0	0	1	0	NA	NA
A0A1Y7VJP1	Ryr2	0	0	0	0	0	0	0	0	1	0	NA	NA
R4GML3	Cntrl	1	1	1	0	0	2	0	0	2	0	NA	NA
E9Q9E7	Cntrl	1	1	1	0	0	2	0	0	2	0	NA	NA
A0A140LJ72	Muc16	0	0	0	0	0	0	0	0	1	1	NA	NA
F8WGL9	Cdv3	0	0	0	0	0	0	0	0	1	0	NA	NA
A0A087WRM0	Cdv3	0	0	0	0	0	0	0	0	1	0	NA	NA
A2ANY8	Ankrd6	0	0	0	0	0	0	0	0	1	0	NA	NA
E9PX79	Marchf10	1	0	0	0	0	0	0	0	1	1	NA	NA
Q91Y09	Pcdhac2	0	0	1	0	0	0	0	0	1	0	NA	NA
F6Y3V0	Ptprf	0	0	0	0	0	0	0	0	1	0	NA	NA
F6S1X8	Ptprf	0	0	0	0	0	0	0	0	1	0	NA	NA
F6XLV1	Crocc2	0	0	0	0	0	0	0	0	1	0	NA	NA
Q5SV55	Pard3b	0	0	0	0	0	0	0	0	1	0	NA	NA
Q5SV54	Pard3b	0	0	0	0	0	0	0	0	1	0	NA	NA
Q543V3	Irs1	0	0	0	0	0	0	0	0	1	0	NA	NA
E9PUN6	Adamts9	0	0	0	0	0	0	0	0	1	0	NA	NA
E9Q6P9	Cacna1h	0	0	0	0	0	0	0	0	1	0	NA	NA
F6USE5	Cacna1h	0	0	0	0	0	0	0	0	1	0	NA	NA
Q3V0Z2	Gmcl1	0	0	0	0	0	0	0	0	1	0	NA	NA
A0A338P695	Smpd4	0	0	0	0	0	0	0	0	1	0	NA	NA
A0A0U1RNL1	Maz	4	5	0	0	7	4	10	0	1	2	NA	Myc-associated zinc finger protein OS=Mus musculus OX=10090 GN=Maz PE=1 SV=1
F8VPK3	Maz	4	5	0	0	7	4	10	0	1	2	NA	Myc-associated zinc finger protein OS=Mus musculus OX=10090 GN=Maz PE=1 SV=1
B9EIX2	Cep170b	0	0	0	0	0	0	0	0	1	0	NA	NA
G3X9H5	Htt	1	0	0	0	1	0	1	0	1	1	NA	Huntingtin OS=Mus musculus OX=10090 GN=Htt PE=1 SV=1
E9QAH1	Golgb1	1	1	0	0	2	1	0	0	1	0	NA	NA
E9PVZ8	Golgb1	1	1	0	0	2	1	0	0	1	0	NA	NA
D3Z1A6	Cidec	0	0	0	0	0	0	0	0	1	0	NA	NA
B1AYM9	CK137956	0	0	0	0	0	0	0	0	1	0	NA	NA
A0A0B4J1M0	Ighv1-77	0	0	0	0	0	0	0	0	1	0	NA	NA
A0A075B5V8	Ighv1-47	0	0	0	0	0	0	0	0	1	2	Carbamidomethylation; Acetylation (Protein N-term)	NA
A0A075B680	Ighv1-62-2	0	0	0	0	0	0	0	0	1	0	NA	NA
A0A1B0GSI7	Col4a1	0	0	0	0	0	0	0	0	1	0	NA	NA
E9Q7Q7	Rhpn1	0	0	0	0	0	0	0	0	1	0	NA	NA
E9PXY1	Cul4b	0	0	0	0	0	0	0	0	1	0	NA	NA
J3QJX0	Cul4b	0	0	0	0	0	0	0	0	1	0	NA	NA
F8WJA7	Aff3	0	0	1	0	0	1	1	0	1	1	Carbamidomethylation	AF4/FMR2 family member 3 OS=Mus musculus OX=10090 GN=Aff3 PE=1 SV=1
D3YYI6	Aff3	0	0	1	0	0	1	1	0	1	1	Carbamidomethylation	AF4/FMR2 family member 3 OS=Mus musculus OX=10090 GN=Aff3 PE=1 SV=1
E9QNY8	Sacs	1	0	0	0	0	0	0	0	1	0	NA	NA
A0A075B5K8	Igkv1-99	0	0	0	0	0	0	0	0	0	170	NA	NA
F6XWB2	Igkv1-99	0	0	0	0	0	0	0	0	0	170	NA	NA
A0A0A6YW89	Pfkfb3	0	0	0	0	326	0	0	0	0	159	Carbamidomethylation; Oxidation (M)	NA
A0A075B5N0	Igkv1-35	0	0	0	0	0	0	0	0	0	72	NA	NA
A0A0G2JDE5	Igkv1-35	0	0	0	0	0	0	0	0	0	72	NA	NA
E9Q5F6	Ubc	0	0	0	0	0	0	0	0	0	99	NA	NA
Q5SX22	Ubb	0	0	0	0	0	0	0	0	0	99	NA	NA
E9QNP0	Kxd1	0	0	0	0	79	0	0	0	0	99	NA	NA
A0A0A6YW67	Gm8797	0	0	0	0	0	0	0	0	0	99	NA	NA
E9Q9J0	Uba52	0	0	0	0	0	0	0	0	0	99	NA	NA
E9Q4P0	Kxd1	0	0	0	0	0	0	0	0	0	99	NA	NA
A0A1B0GSX0	Ldha	0	0	18	0	0	0	0	0	0	32	Carbamidomethylation; Oxidation (M)	NA
E9Q0F0	Krt78	57	0	0	0	0	0	0	0	0	51	NA	NA
A0A1L1SUX8	Thy1	13	11	23	0	14	13	9	0	0	21	Carbamidomethylation	Thy-1 membrane glycoprotein (Fragment) OS=Mus musculus OX=10090 GN=Thy1 PE=1 SV=1
G3UZ48	Syncrip	0	0	0	0	0	0	0	0	0	15	Carbamidomethylation	NA
A0A1B0GRR3	Rps11	0	0	0	0	0	0	0	0	0	15	Carbamidomethylation	NA
A0A0B4J1H7	Igkv1-135	0	0	0	0	0	0	0	0	0	14	NA	NA
A0A0B4J1H8	Igkv1-133	0	0	0	0	0	0	0	0	0	14	NA	NA
Q8CBB6	H2bc23	26	27	0	0	33	29	0	0	0	13	Oxidation (M)	NA
F7B5B5	Hnrnpr	0	0	0	0	0	0	0	0	0	8	Carbamidomethylation	NA
F8WHM5	Glg1	6	4	0	0	4	4	3	0	0	3	Carbamidomethylation	Golgi apparatus protein 1 (Fragment) OS=Mus musculus OX=10090 GN=Glg1 PE=1 SV=1
Q8BQ10	Hdac2	0	0	10	0	0	0	0	0	0	9	Oxidation (M)	NA
A0A0N4SUX5	Eno2	0	0	0	0	0	0	0	0	0	5	NA	NA
D3Z6E4	Eno2	0	0	0	0	0	0	0	0	0	5	NA	NA
G3X8Y3	Naa15	8	5	1	0	8	4	17	0	0	7	NA	N-alpha-acetyltransferase 15 NatA auxiliary subunit OS=Mus musculus OX=10090 GN=Naa15 PE=1 SV=1
Q3V4D5	Naa10	0	0	0	0	0	0	4	0	0	3	NA	N-acetyltransferase ARD1 homolog (S. cerevisiae) isoform CRA_b OS=Mus musculus OX=10090 GN=Naa10 PE=1 SV=1
A0A0R4J031	Trim35	0	4	0	0	0	7	50	0	0	5	Carbamidomethylation	Tripartite motif-containing 35 OS=Mus musculus OX=10090 GN=Trim35 PE=1 SV=1
A0A0B4J1I9	Igkv4-55	0	0	0	0	0	0	0	0	0	3	NA	NA
A0A140T8P6	Igkv12-46	0	0	0	0	0	0	0	0	0	3	NA	NA
D3Z6W5	Tmem9b	0	0	0	0	0	0	0	0	0	8	NA	NA
A0A494B9A7	Cfl1	0	0	0	0	0	0	0	0	0	5	Carbamidomethylation; Acetylation (Protein N-term)	NA
A2BDX2	Dpm1	3	0	0	0	3	1	0	0	0	3	NA	NA
A0A494B945	Rab1b	9	6	8	0	6	5	4	0	0	6	NA	Ras-related protein Rab-1B (Fragment) OS=Mus musculus OX=10090 GN=Rab1b PE=1 SV=1
A0A0U1RNN5	Spn	0	0	0	0	0	0	0	0	0	3	NA	NA
A0A2I3BPX3	Ano6	0	0	1	0	0	0	0	0	0	3	Carbamidomethylation	NA
A0A1W2P7A1	Rps12	0	0	0	0	0	0	7	0	0	6	Carbamidomethylation	40S ribosomal protein S12 OS=Mus musculus OX=10090 GN=Rps12 PE=1 SV=1
A2ATU9	Hat1	0	0	0	0	0	0	0	0	0	4	Oxidation (M)	NA
D3YWH4	Tm9sf1	0	0	0	0	0	0	0	0	0	4	Carbamidomethylation	NA
D3Z6X7	Tm9sf1	0	0	0	0	0	0	0	0	0	4	Carbamidomethylation	NA
A0A1D5RMA4	Slc7a6	0	0	0	0	0	0	0	0	0	3	Acetylation (Protein N-term); Oxidation (M)	NA
A0A1D5RMI7	Slc7a6	0	0	0	0	0	0	0	0	0	3	Acetylation (Protein N-term); Oxidation (M)	NA
A0A1D5RM43	Slc7a6	0	0	0	0	0	0	0	0	0	3	Acetylation (Protein N-term); Oxidation (M)	NA
A0A494BB75	Wdr26	6	5	0	0	10	7	14	0	0	3	NA	WD repeat-containing protein 26 OS=Mus musculus OX=10090 GN=Wdr26 PE=1 SV=1
A0A1W2P6G5	Myl6	140	135	0	0	154	136	0	0	0	4	Carbamidomethylation; Oxidation (M)	NA
Q544E8	Rab37	0	0	0	0	0	0	0	0	0	5	NA	NA
A0A1B0GT66	Gm49369	0	0	0	0	5	2	0	0	0	7	Carbamidomethylation; Oxidation (M)	NA
F6Y6L6	Gm49369	9	0	0	0	5	0	0	0	0	7	Carbamidomethylation; Oxidation (M)	NA
D3Z2D8	Tmem63b	0	0	0	0	0	0	0	0	0	5	NA	NA
A0A1B0GSU0	Aldh16a1	3	0	0	0	0	3	3	0	0	3	NA	Aldehyde dehydrogenase family 16 member A1 OS=Mus musculus OX=10090 GN=Aldh16a1 PE=1 SV=1
Q8C4U8	Edil3	0	0	0	0	0	0	0	0	0	5	NA	NA
Q8C8K0	Edil3	0	0	0	0	0	0	0	0	0	5	NA	NA
D3Z131	NA	0	10	0	0	0	11	0	0	0	3	NA	NA
D3Z132	Thoc6	0	0	0	0	0	0	0	0	0	3	NA	NA
E9PW20	Chtop	12	8	0	0	12	8	11	0	0	2	NA	Chromatin target of PRMT1 protein OS=Mus musculus OX=10090 GN=Chtop PE=1 SV=1
A0A0R4IZY0	Thop1	0	0	0	0	0	0	6	0	0	6	NA	Thimet oligopeptidase OS=Mus musculus OX=10090 GN=Thop1 PE=1 SV=1
A0A286YDI8	Sec24c	0	0	0	0	0	0	0	0	0	5	NA	NA
G3X972	Sec24c	0	0	0	0	0	0	0	0	0	5	NA	NA
E9PV22	Lrrc47	0	0	0	0	0	0	3	0	0	2	NA	Leucine-rich repeat-containing protein 47 OS=Mus musculus OX=10090 GN=Lrrc47 PE=1 SV=1
A2AAP0	Rnf157	0	0	0	0	0	0	0	0	0	3	Carbamidomethylation	NA
A2AAN9	Rnf157	0	0	0	0	0	0	0	0	0	3	Carbamidomethylation	NA
A0A0N4SUL6	Emg1	1	0	0	0	0	0	0	0	0	3	Acetylation (Protein N-term)	NA
F8VQC9	Slc4a7	0	0	0	0	0	0	0	0	0	3	Oxidation (M)	NA
E9Q1D5	Tgfb1i1	0	0	0	0	0	0	3	0	0	3	Oxidation (M)	Transforming growth factor beta-1-induced transcript 1 protein OS=Mus musculus OX=10090 GN=Tgfb1i1 PE=1 SV=1
E9Q6R3	Sec22b	0	0	0	0	0	0	0	0	0	2	NA	NA
F6R7E8	Gm2663	0	0	0	0	0	3	0	0	0	5	NA	NA
Q9CPN7	1810009J06Rik	0	0	0	0	0	3	0	0	0	5	NA	NA
E9QMK9	Dglucy	0	0	0	0	0	0	4	0	0	2	NA	D-glutamate cyclase mitochondrial OS=Mus musculus OX=10090 GN=Dglucy PE=1 SV=1
J3QNW0	Dnmt1	0	0	1	0	0	0	4	0	0	3	NA	DNA (cytosine-5)-methyltransferase OS=Mus musculus OX=10090 GN=Dnmt1 PE=1 SV=1
A0A494BB89	Nars1	0	0	0	0	0	0	0	0	0	2	NA	NA
D3YV69	Rab6a	0	0	0	0	0	0	0	0	0	4	NA	NA
Q3TJ22	Aamp	0	0	0	0	1	0	0	0	0	2	Carbamidomethylation	NA
J3QN89	Aamp	0	0	0	0	1	0	0	0	0	2	Carbamidomethylation	NA
E9Q2L7	Rnf19b	0	0	0	0	0	0	0	0	0	3	Carbamidomethylation	NA
B2KG08	Rnf19b	0	0	0	0	0	0	0	0	0	3	Carbamidomethylation	NA
A0A0R4J036	Nefm	0	0	0	0	0	0	0	0	0	4	NA	NA
E9PYF1	Rnpep	0	0	0	0	0	0	0	0	0	2	Acetylation (Protein N-term)	NA
A0A0A6YXL3	Rpl31	0	0	0	0	0	0	0	0	0	4	NA	NA
F6TZU3	Gan	0	0	0	0	0	0	0	0	0	2	Acetylation (Protein N-term)	NA
D3Z1U9	Ndufv1	0	4	0	0	0	0	0	0	0	3	Carbamidomethylation	NA
D3YUM1	Ndufv1	9	4	0	0	10	4	6	0	0	3	Carbamidomethylation	NADH dehydrogenase [ubiquinone] flavoprotein 1 mitochondrial OS=Mus musculus OX=10090 GN=Ndufv1 PE=1 SV=1
A0A0G2JDY4	Acad9	0	0	0	0	0	1	0	0	0	2	NA	NA
D6REF7	Sgpl1	0	0	0	0	0	0	0	0	0	2	NA	NA
F8WIJ0	Slc12a4	0	0	0	0	0	0	0	0	0	2	NA	NA
F8WGG3	Myg1	0	0	0	0	0	0	0	0	0	3	NA	NA
A0A494BB21	Ptprcap	0	0	0	0	0	0	0	0	0	3	Carbamidomethylation	NA
G3UZ26	Shmt1	0	1	0	0	3	1	3	0	0	4	Acetylation (Protein N-term)	Serine hydroxymethyltransferase (Fragment) OS=Mus musculus OX=10090 GN=Shmt1 PE=1 SV=1
D3YZ06	Hspb1	0	0	0	0	8	0	0	0	0	2	NA	NA
Q3TSA8	Scamp1	0	0	0	0	0	0	0	0	0	2	NA	NA
E9Q1W0	Camk2d	13	11	5	0	10	8	9	0	0	3	NA	Calcium/calmodulin-dependent protein kinase type II subunit delta OS=Mus musculus OX=10090 GN=Camk2d PE=1 SV=2
A0A0G2JGS4	Camk2d	13	11	5	0	10	8	9	0	0	3	NA	Calcium/calmodulin-dependent protein kinase type II subunit delta OS=Mus musculus OX=10090 GN=Camk2d PE=1 SV=1
E9Q1T1	Camk2d	13	11	5	0	10	8	9	0	0	3	NA	Calcium/calmodulin-dependent protein kinase type II subunit delta OS=Mus musculus OX=10090 GN=Camk2d PE=1 SV=1
A0A494BAW7	Ik	0	0	0	0	0	0	0	0	0	2	NA	NA
F6WYM0	Septin2	0	1	0	0	0	0	0	0	0	2	NA	NA
D3YYB1	Septin2	0	1	0	0	0	0	0	0	0	2	NA	NA
D3Z3C0	Septin2	0	1	0	0	0	0	0	0	0	2	NA	NA
A0A1B0GRX1	Casp3	0	0	0	0	0	0	2	0	0	3	Acetylation (Protein N-term)	Caspase-3 OS=Mus musculus OX=10090 GN=Casp3 PE=1 SV=1
H7BX33	4933434E20Rik	0	0	0	0	0	0	0	0	0	2	NA	NA
A0A3B2W7H4	Anks1	0	0	0	0	0	0	0	0	0	2	NA	NA
A0A3B2WAQ7	Anks1	16	13	0	0	17	11	7	0	0	2	NA	Ankyrin repeat and SAM domain containing 1 OS=Mus musculus OX=10090 GN=Anks1 PE=1 SV=1
Q3UHP6	Anks1	16	13	0	0	17	11	7	0	0	2	NA	Ankyrin repeat and SAM domain containing 1 OS=Mus musculus OX=10090 GN=Anks1 PE=1 SV=1
A2AI57	Trpm7	0	0	0	0	0	0	0	0	0	2	NA	NA
H3BJ37	Comtd1	0	0	0	0	0	0	0	0	0	3	Carbamidomethylation	NA
H3BJH5	Cers5	0	0	0	0	0	0	0	0	0	2	NA	NA
H3BJ49	Cers5	0	0	0	0	0	0	0	0	0	2	NA	NA
H3BJQ0	Cers5	0	0	0	0	0	0	0	0	0	2	NA	NA
Q05BC8	Nbr1	0	0	0	0	0	0	0	0	0	2	NA	NA
K3W4P1	Nbr1	0	0	0	0	0	0	0	0	0	2	NA	NA
A0A2R8VHH0	Rac2	0	5	11	0	0	0	0	0	0	2	NA	NA
A0A2I3BPI4	Khnyn	0	0	0	0	0	0	0	0	0	2	NA	NA
E9Q0G1	Denr	0	1	1	0	0	0	0	0	0	3	Carbamidomethylation; Acetylation (Protein N-term)	NA
D3Z6N3	Mcm7	0	0	0	0	0	0	0	0	0	3	Acetylation (Protein N-term)	NA
A0A494BBB0	NA	0	0	0	0	0	0	0	0	0	2	NA	NA
F6VR84	Poldip3	0	0	0	0	0	0	0	0	0	1	NA	NA
A0A0A6YVU1	Nudt5	0	0	0	0	0	0	0	0	0	1	NA	NA
A2ATT5	Nudt5	0	0	0	0	0	0	0	0	0	1	NA	NA
A0A0A0MQ68	Gcdh	0	0	0	0	0	0	5	0	0	2	NA	Glutaryl-CoA dehydrogenase mitochondrial OS=Mus musculus OX=10090 GN=Gcdh PE=1 SV=1
A0A3Q4EGR2	Rock1	0	0	0	0	0	0	0	0	0	3	NA	NA
Q5SVG5	Ap1b1	0	0	0	0	0	0	0	0	0	3	Carbamidomethylation	NA
Q5SVG4	Ap1b1	0	0	0	0	0	0	0	0	0	3	Carbamidomethylation	NA
Q6GT24	Prdx6	2	0	0	0	3	0	1	0	0	3	Carbamidomethylation	Peroxiredoxin-6 OS=Mus musculus OX=10090 GN=Prdx6 PE=1 SV=1
Q8C253	Lgals3	0	0	0	0	2	0	0	0	0	2	NA	NA
A2A880	Snx11	0	0	0	0	0	0	0	0	0	1	NA	NA
K3W4T3	Atp6v0a1	0	0	0	0	0	0	0	0	0	2	NA	NA
G5E8Z3	Kplce	0	0	0	0	0	0	0	0	0	2	Carbamidomethylation	NA
E9Q9Q9	Adgrl1	0	0	0	0	0	0	0	0	0	1	NA	NA
E9Q3V9	Adgrl1	0	0	0	0	0	0	0	0	0	1	NA	NA
H7BX15	Adgrl1	0	0	0	0	0	0	0	0	0	1	NA	NA
F6YP92	Adgrl1	0	0	0	0	0	0	0	0	0	1	NA	NA
Q99L59	Xlr3a	0	0	0	0	0	0	0	0	0	2	NA	NA
Q6PGJ8	H13	0	0	0	0	0	0	0	0	0	1	NA	NA
A3KGR9	H13	2	0	0	0	0	0	0	0	0	1	NA	NA
A0A075B5N3	Igkv8-28	0	0	0	0	0	0	0	0	0	2	NA	NA
A0A0G2JE47	Igkv8-28	0	0	0	0	0	0	0	0	0	2	NA	NA
A2BHN6	Fbxo3	1	0	0	0	0	1	2	0	0	1	NA	F-box only protein 3 OS=Mus musculus OX=10090 GN=Fbxo3 PE=1 SV=1
A0A140T8M5	Igkv6-15	0	0	0	0	0	0	0	0	0	2	NA	NA
A0A286YDU2	Atxn2	0	0	0	0	7	0	0	0	0	1	NA	NA
A2AUE1	Dnajc5	0	0	0	0	0	0	0	0	0	2	NA	NA
G5E8T0	Dnajc5	0	0	0	0	0	0	0	0	0	2	NA	NA
D3Z6U8	Fmr1	0	0	1	0	0	0	0	0	0	1	NA	NA
E9QNF5	Fmr1	0	0	1	0	0	0	0	0	0	1	NA	NA
A0A286YDT6	Btrc	0	1	0	0	4	1	0	0	0	2	NA	NA
G3X9Y1	Syt3	0	0	0	0	0	0	0	0	0	1	NA	NA
Q8CBB7	Ap1g1	0	0	0	0	0	0	0	0	0	1	NA	NA
Q542I8	Itgb2	0	0	0	0	2	0	0	0	0	1	Carbamidomethylation	NA
Q5I0W6	Tmt1a2	0	0	0	0	0	0	0	0	0	1	NA	NA
D6RCX5	Mtfr1l	0	0	0	0	0	0	0	0	0	1	NA	NA
D3Z0X8	Mtfr1l	0	0	0	0	0	0	0	0	0	1	NA	NA
D3YW54	Mtfr1l	0	0	0	0	0	0	0	0	0	1	NA	NA
A0A2R8VI72	Gga1	0	0	0	0	0	0	0	0	0	1	NA	NA
D3YZE2	Mcoln3	0	0	0	0	0	0	0	0	0	1	Carbamidomethylation; Acetylation (Protein N-term)	NA
F7ALS6	Got1	0	0	0	0	0	0	0	0	0	2	NA	NA
A0A140T8N9	Igkv6-32	0	0	0	0	0	0	0	0	0	2	NA	NA
B1AWE1	Clta	16	8	0	0	9	12	3	0	0	1	NA	Clathrin light chain OS=Mus musculus OX=10090 GN=Clta PE=1 SV=1
F6WLY0	Irag2	1	0	0	0	0	0	0	0	0	2	NA	NA
G5E880	Irag2	1	0	0	0	0	0	0	0	0	2	NA	NA
F8VQG4	H2-T24	0	0	0	0	0	0	0	0	0	1	NA	NA
H3BJ70	Ago1	2	0	0	0	0	0	0	0	0	1	NA	NA
Q8BG78	Xkr5	0	0	0	0	0	0	0	0	0	1	NA	NA
G3UX07	Dnmt3a	1	0	0	0	0	1	1	0	0	1	NA	DNA (cytosine-5)-methyltransferase 3A (Fragment) OS=Mus musculus OX=10090 GN=Dnmt3a PE=1 SV=1
G3UXY2	Dnmt3a	0	0	0	0	0	1	0	0	0	1	NA	NA
B7ZCB8	Stx16	0	0	0	0	0	0	0	0	0	1	NA	NA
F7CJY7	Stx16	0	0	0	0	0	0	0	0	0	1	NA	NA
F6X4N5	Stx16	0	0	0	0	0	0	0	0	0	1	NA	NA
A0A494BAV5	Scd2	1	0	0	0	0	0	0	0	0	1	NA	NA
E9QP59	Lemd3	0	0	0	0	0	0	0	0	0	1	NA	NA
D3YU56	Lemd3	0	0	0	0	0	0	0	0	0	1	NA	NA
A0A1I7Q4A1	Cdkn2aip	2	0	0	0	1	0	0	0	0	1	Acetylation (Protein N-term)	NA
A0A286YCB2	Ubr2	0	0	0	0	0	0	0	0	0	1	Carbamidomethylation	NA
D6RCI7	Mrto4	0	0	0	0	0	0	0	0	0	1	NA	NA
A0A0G2JEJ0	Pdlim5	0	0	0	0	0	0	1	0	0	1	NA	PDZ and LIM domain protein 5 (Fragment) OS=Mus musculus OX=10090 GN=Pdlim5 PE=1 SV=1
D9J2Z9	Pdlim5	0	0	0	0	0	0	1	0	0	1	NA	ENH isoform 1b OS=Mus musculus OX=10090 GN=Pdlim5 PE=1 SV=1
D9J300	Pdlim5	0	0	0	0	0	0	1	0	0	1	NA	ENH isoform 1c OS=Mus musculus OX=10090 GN=Pdlim5 PE=1 SV=1
D9J301	Pdlim5	0	0	0	0	0	0	1	0	0	1	NA	ENH isoform 1d OS=Mus musculus OX=10090 GN=Pdlim5 PE=1 SV=1
D3Z7U0	Anxa11	0	0	0	0	0	0	0	0	0	1	NA	NA
E9QAQ3	Arhgap26	0	0	0	0	0	0	0	0	0	1	NA	NA
A0A1W2P7G2	Sarnp	0	0	0	0	0	0	0	0	0	1	NA	NA
A0A1W2P6N2	Sarnp	0	0	0	0	0	0	0	0	0	1	NA	NA
F8WGJ7	Srpk1	0	0	0	0	0	0	0	0	0	1	NA	NA
A0A3B2W430	Srpk1	0	0	0	0	0	0	0	0	0	1	NA	NA
A0A3B2W4B9	Srpk1	0	0	0	0	0	0	0	0	0	1	NA	NA
A0A3B2W883	Srpk1	0	0	0	0	0	0	0	0	0	1	NA	NA
G3UZZ3	Dnm2	0	1	0	0	4	1	0	0	0	1	NA	NA
Q3T9X3	Dnm2	3	0	0	0	4	1	0	0	0	1	NA	NA
D3Z3F4	Mtx1	0	0	0	0	0	0	0	0	0	1	NA	NA
I1E4X1	Stx5a	0	0	0	0	0	0	0	0	0	1	NA	NA
E9QPZ3	Flg2	0	0	0	0	0	0	0	0	0	2	Oxidation (M)	NA
E9Q6Q4	Rap1gds1	0	0	0	0	0	0	0	0	0	1	NA	NA
A0A087WQC4	Taf6l	0	0	0	0	0	0	0	0	0	1	NA	NA
H3BJR2	Taf6l	0	0	0	0	0	0	0	0	0	1	NA	NA
A2ASM0	Lnpk	0	0	0	0	0	0	0	0	0	1	NA	NA
A0A0G2JGD2	S100a4	0	0	0	0	0	0	0	0	0	1	NA	NA
A2BH06	Rpl11	0	0	0	0	0	0	1	0	0	1	NA	60S ribosomal protein L11 (Fragment) OS=Mus musculus OX=10090 GN=Rpl11 PE=1 SV=1
D3YXK0	Jakmip2	0	0	0	0	0	0	0	0	0	1	NA	NA
E0CYS0	Acot11	0	0	0	0	0	0	0	0	0	1	Acetylation (Protein N-term)	NA
F6SLP4	Ergic1	0	0	0	0	0	0	0	0	0	1	NA	NA
A0A494BAW5	Ergic1	0	0	0	0	0	0	0	0	0	1	NA	NA
A0A494BAK4	Ergic1	0	0	0	0	0	0	0	0	0	1	NA	NA
B1AR28	Acadvl	1	0	0	0	1	1	0	0	0	1	NA	NA
A0A0U1RNM2	Gatad2b	0	0	0	0	0	0	1	0	0	1	NA	Transcriptional repressor p66-beta (Fragment) OS=Mus musculus OX=10090 GN=Gatad2b PE=1 SV=1
A0A498WGR9	Ubash3a	0	0	0	0	0	0	0	0	0	1	NA	NA
A0A3Q4EG99	Mtch1	0	1	0	0	0	0	0	0	0	1	NA	NA
A0A3Q4EBT8	Mtch1	0	1	0	0	0	0	0	0	0	1	NA	NA
D3YXC2	Mtch1	0	1	0	0	0	0	0	0	0	1	NA	NA
A0A3Q4EC24	Mtch1	0	1	0	0	0	0	0	0	0	1	NA	NA
A0A3Q4EGL4	Mtch1	0	1	0	0	0	0	0	0	0	1	NA	NA
A0A087WQM9	Serpinb5	0	0	0	0	0	0	0	0	0	1	NA	NA
Q8BG13	Rbm3	0	0	0	0	0	0	0	0	0	1	NA	NA
Q3U3K9	Aup1	0	0	0	0	0	0	0	0	0	1	NA	NA
D3Z6N5	Krt7	0	0	0	0	0	0	1	0	0	4	Acetylation (Protein N-term)	Keratin type II cytoskeletal 7 (Fragment) OS=Mus musculus OX=10090 GN=Krt7 PE=1 SV=1
A2AWR2	Gpr155	0	0	0	0	0	0	0	0	0	2	NA	NA
A2AWR3	Gpr155	0	0	0	0	0	0	0	0	0	2	NA	NA
S4R2H5	Rpf2	0	0	0	0	0	0	0	0	0	1	NA	NA
A0A0U1RQ71	Rps13	0	0	0	0	0	0	0	0	0	1	NA	NA
A0A140T8M2	Igkv12-44	0	0	0	0	0	0	0	0	0	1	NA	NA
E9Q616	Ahnak	0	0	0	0	0	0	0	0	0	1	NA	NA
A0A0N4SUM8	Gm45140	0	0	0	0	0	0	0	0	0	1	NA	NA
A0A2I3BRX3	Sfmbt1	0	0	0	0	0	0	0	0	0	1	NA	NA
A0A2I3BPX6	Sfmbt1	0	0	0	0	0	0	0	0	0	1	NA	NA
V9GWY8	Pigb	0	0	0	0	0	0	0	0	0	1	NA	NA
D6RCK1	Rad51	0	1	0	0	2	2	0	0	0	1	NA	NA
G5E898	Ppl	0	0	0	0	0	0	0	0	0	1	NA	NA
F7CR78	Ttn	0	2	0	0	2	3	3	0	0	1	NA	Titin (Fragment) OS=Mus musculus OX=10090 GN=Ttn PE=1 SV=1
A0A1D5RLF2	Psme3ip1	0	0	1	0	1	1	0	0	0	1	NA	NA
A0A1D5RLI3	Psme3ip1	0	0	1	0	1	1	0	0	0	1	NA	NA
A0A1D5RLY1	Psme3ip1	0	0	0	0	1	1	0	0	0	1	NA	NA
A0A1D5RLD7	Psme3ip1	0	0	0	0	0	0	0	0	0	1	NA	NA
A0A1D5RLT4	Psme3ip1	0	0	0	0	0	0	0	0	0	1	NA	NA
A0A1D5RLJ3	Psme3ip1	0	0	0	0	0	0	0	0	0	1	NA	NA
G5E8X2	Pabpc4l	0	0	0	0	0	0	4	0	0	3	Oxidation (M)	MCG12357 OS=Mus musculus OX=10090 GN=Pabpc4l PE=4 SV=1
E9Q263	Unc13b	0	0	0	0	0	0	0	0	0	1	Acetylation (Protein N-term)	NA
B1ATV0	Clcn5	0	0	0	0	0	0	0	0	0	1	NA	NA
A2BFF8	Dync1i2	0	0	2	0	0	0	6	0	0	1	NA	Cytoplasmic dynein 1 intermediate chain 2 OS=Mus musculus OX=10090 GN=Dync1i2 PE=1 SV=1
A2AQN9	Gss	0	0	0	0	0	0	0	0	0	1	NA	NA
A0A0G2JEX7	Rps27	0	0	0	0	0	0	0	0	0	1	Carbamidomethylation	NA
A0A0G2JFT9	Prkacb	0	0	2	0	0	0	0	0	0	1	NA	NA
Q80X68	Csl	0	0	0	0	0	0	2	0	0	1	NA	Citrate synthase OS=Mus musculus OX=10090 GN=Csl PE=1 SV=1
Q3TTL3	Spata7	0	0	2	0	0	0	0	0	0	1	NA	NA
Q3U5D0	Spata7	0	0	2	0	0	0	0	0	0	1	NA	NA
G3UYD0	Gtf2i	0	0	0	0	0	5	2	0	0	1	NA	General transcription factor II-I OS=Mus musculus OX=10090 GN=Gtf2i PE=1 SV=1
V9GXD2	Hmgcll1	0	0	0	0	0	0	0	0	0	1	NA	NA
V9GWZ9	Hmgcll1	0	0	0	0	0	0	0	0	0	1	NA	NA
D3YVU9	Hmgcll1	0	0	0	0	0	0	0	0	0	1	NA	NA
A0A1B0GR11	Taldo1	0	0	0	0	0	0	0	0	0	1	NA	NA
E9Q0I8	Homer1	0	0	0	0	0	0	0	0	0	1	NA	NA
E9Q0I7	Homer1	0	0	0	0	0	0	0	0	0	1	NA	NA
D3Z6A7	Homer1	0	0	0	0	0	0	0	0	0	1	NA	NA
G3X9M2	Skida1	2	0	0	0	1	0	0	0	0	1	Carbamidomethylation	NA
Q80ZX2	Zfp790	1	0	0	0	0	0	0	0	0	1	NA	NA
Q4VBG2	Magi1	0	0	2	0	0	0	0	0	0	1	NA	NA
A0A0R4J0S6	Magi1	0	0	2	0	0	0	0	0	0	1	NA	NA
A0A0N4SUZ0	Magi1	0	0	2	0	0	0	0	0	0	1	NA	NA
B1B1A8	Mylk	0	1	0	0	1	0	0	0	0	1	NA	NA
Q7TSJ7	Mapk8	0	1	0	0	1	0	0	0	0	1	NA	NA
Q91WA9	Abcg4	0	0	0	0	0	0	0	0	0	1	Carbamidomethylation	NA
F6XWY6	Abcg4	0	0	0	0	0	0	0	0	0	1	Carbamidomethylation	NA
E9Q3Y7	Cracd	0	0	0	0	0	0	0	0	0	1	NA	NA
E9Q5L4	Cracd	0	0	0	0	0	0	0	0	0	1	NA	NA
F6RYL8	Dmxl2	0	0	0	0	0	0	0	0	0	1	NA	NA
B0V2P5	Dmxl2	0	0	0	0	0	0	0	0	0	1	NA	NA
E0CZ90	Psme2	0	0	0	0	0	0	0	0	0	1	NA	NA
Q8C5J0	Sp2	0	1	0	0	0	0	0	0	0	1	NA	NA
A0A0G2JFB4	Eif4e	0	0	7	0	0	5	0	0	0	1	NA	NA
A0A0G2JH04	Eif4e	0	0	7	0	0	5	0	0	0	1	NA	NA
A0A0G2JGT5	Eif4e	0	3	0	0	0	0	0	0	0	1	NA	NA
G3UWI7	B3gnt2	0	0	0	0	0	0	0	0	0	1	NA	NA
J3QNU1	Ate1	0	0	0	0	0	0	0	0	0	1	NA	NA
A0A0H2UH17	Ubap2l	0	4	0	0	4	3	4	0	0	1	NA	Ubiquitin associated protein 2-like isoform CRA_b OS=Mus musculus OX=10090 GN=Ubap2l PE=1 SV=1
W4VSP9	Rad18	0	0	0	0	0	0	0	0	0	1	NA	NA
F8WGE3	Abca8a	0	0	0	0	0	0	0	0	0	1	NA	NA
Q4KL31	Psg19	0	0	0	0	0	0	0	0	0	1	NA	NA
D6RFT4	Uty	0	0	0	0	0	0	0	0	0	1	NA	NA
E9PWW8	Uty	0	0	0	0	0	0	0	0	0	1	NA	NA
G3X9F2	Uty	0	0	0	0	0	0	0	0	0	1	NA	NA
E9Q6I2	Il1rap	0	0	0	0	0	0	0	0	0	1	NA	NA
Q3TX55	Arpc4	0	0	0	0	0	0	0	0	0	1	NA	NA
E9PWA7	Arpc4	0	0	0	0	0	0	0	0	0	1	NA	NA
Q3V1N5	Heca	0	0	0	0	0	0	0	0	0	1	NA	NA
A0A0A0MQG8	Zbtb48	0	0	0	0	0	0	0	0	0	1	NA	NA
B1AYU7	Cwc22	12	6	0	0	6	7	0	0	0	1	NA	NA
A0A1W2P729	Cnpy2	0	0	0	0	0	0	0	0	0	1	NA	NA
G3X8X7	Vps16	0	0	0	0	0	1	1	0	0	1	NA	Vacuolar protein sorting-associated protein 16 homolog OS=Mus musculus OX=10090 GN=Vps16 PE=1 SV=1
G5E823	Hars2	1	0	0	0	0	0	0	0	0	1	NA	NA
G3UWJ8	Kpna1	0	0	0	0	0	0	0	0	0	1	Acetylation (Protein N-term)	NA
G3UZK5	Kpna1	0	3	0	0	0	0	0	0	0	1	Acetylation (Protein N-term)	NA
E9Q405	Myo18a	1245	1128	223	0	1253	0	0	0	0	0	NA	NA
E9Q5I9	Psmd13	0	0	12	0	0	0	0	0	0	0	NA	NA
G3X9I4	Alyref2	30	0	13	0	19	0	0	0	0	0	NA	NA
H3BKR2	Gnb1	0	0	8	0	0	0	0	0	0	0	NA	NA
E9PV93	Ly9	4	1	5	0	3	1	0	0	0	0	NA	NA
E9PUD0	Zranb2	0	0	5	0	0	0	0	0	0	0	NA	NA
A0A494B908	Gstp1	0	0	5	0	0	0	0	0	0	0	NA	NA
A0A494BAW2	Gstp1	0	0	5	0	0	0	0	0	0	0	NA	NA
A0A2R8W6Y5	Larp4	25	0	4	0	25	24	0	0	0	0	NA	NA
H7BWZ3	Arpc3	0	0	10	0	0	0	0	0	0	0	NA	NA
I7HLV2	Rpl10	0	0	8	0	0	0	0	0	0	0	NA	NA
Q3TM89	Pcnp	1	0	2	0	0	3	0	0	0	0	NA	NA
A0A2I3BQP6	Camk2g	7	8	4	0	0	6	7	0	0	0	NA	Calcium/calmodulin-dependent protein kinase type II subunit gamma OS=Mus musculus OX=10090 GN=Camk2g PE=1 SV=1
F8WIS9	Camk2a	0	0	4	0	0	0	0	0	0	0	NA	NA
Q8CCM0	Camk2d	0	0	4	0	0	0	9	0	0	0	NA	Calcium/calmodulin-dependent protein kinase type II subunit delta OS=Mus musculus OX=10090 GN=Camk2d PE=1 SV=1
A0A338P6E8	Hmga1	0	0	3	0	0	0	0	0	0	0	NA	NA
F6YB25	Rprd1b	0	0	3	0	0	0	2	0	0	0	NA	Regulation of nuclear pre-mRNA domain-containing protein 1B (Fragment) OS=Mus musculus OX=10090 GN=Rprd1b PE=1 SV=1
H3BLD4	Kdm2a	0	0	3	0	0	0	0	0	0	0	NA	NA
S4R1F8	NA	0	0	3	0	0	0	0	0	0	0	NA	NA
Q9Z1A1	Tfg	0	0	2	0	0	0	0	0	0	0	NA	NA
A8Y5G7	Pold2	0	0	1	0	0	0	0	0	0	0	NA	NA
E0CXP3	Cd3g	0	0	2	0	0	1	0	0	0	0	NA	NA
G5E8D1	Sprr2k	0	0	1	0	2	0	0	0	0	0	NA	NA
A9JTY7	Sprr2b	0	0	1	0	2	0	2	0	0	0	NA	MCG119409 OS=Mus musculus OX=10090 GN=Sprr2b PE=2 SV=1
Z4YMT7	Tmem268	0	0	1	0	0	0	0	0	0	0	NA	NA
Z4YLK8	Tmem268	0	0	1	0	0	0	0	0	0	0	NA	NA
E9PYF2	Adam10	0	0	1	0	0	0	0	0	0	0	NA	NA
V9GXI0	Snapin	0	0	1	0	0	0	0	0	0	0	NA	NA
E9PXU2	Adam17	0	0	1	0	0	0	0	0	0	0	NA	NA
B7ZBY7	Ube2v1	0	0	1	0	0	0	0	0	0	0	NA	NA
E9PY39	Gm20431	0	0	1	0	0	0	0	0	0	0	NA	NA
B2KF55	Ube2v2	0	0	1	0	0	0	0	0	0	0	NA	NA
A6X925	Ube2v2	0	0	1	0	0	0	0	0	0	0	NA	NA
B7ZBY6	Ube2v1	0	0	1	0	0	0	0	0	0	0	NA	NA
E9PZF0	Gm20390	2	2	1	0	1	2	0	0	0	0	NA	NA
A2ALT5	Ahcy	0	0	1	0	0	0	0	0	0	0	NA	NA
A0A1L1SR69	Higd1a	0	0	1	0	0	0	0	0	0	0	NA	NA
A0A1L1SV00	Higd1a	0	0	1	0	0	0	0	0	0	0	NA	NA
Q8R472	Higd1a	0	0	1	0	0	0	0	0	0	0	NA	NA
Q8BX20	Eif1ad7	0	0	1	0	0	0	0	0	0	0	NA	NA
J3QP87	Eif1ad14	0	0	1	0	0	0	0	0	0	0	NA	NA
Q3TQZ4	Eif1ad3	0	0	1	0	0	0	0	0	0	0	NA	NA
A0A1Y7VK80	Eif1ad12	0	0	1	0	0	0	0	0	0	0	NA	NA
A0A1Y7VJE9	Eif1ad13	0	0	1	0	0	0	0	0	0	0	NA	NA
J3QNT6	Eif1ad15	0	0	1	0	0	0	0	0	0	0	NA	NA
Q3UTA4	Eif1ad10	0	0	1	0	0	0	0	0	0	0	NA	NA
J3QQ02	Eif1ad11	0	0	1	0	0	0	0	0	0	0	NA	NA
A0A1Y7VLT7	Eif1ad4	0	0	1	0	0	0	0	0	0	0	NA	NA
A0A1Y7VNG9	Eif1ad18	0	0	1	0	0	0	0	0	0	0	NA	NA
J3QMW5	Eif1ad17	0	0	1	0	0	0	0	0	0	0	NA	NA
Q3UT53	Eif1ad2	0	0	1	0	0	0	0	0	0	0	NA	NA
J3QPI8	Eif1ad16	0	0	1	0	0	0	0	0	0	0	NA	NA
F6QPR1	Phb2	0	0	1	0	0	0	0	0	0	0	NA	NA
A0A286YDB8	Elp3	1	0	1	0	1	0	0	0	0	0	NA	NA
A0A1Y7VJG9	Ppp4r3a	0	0	1	0	0	0	0	0	0	0	NA	NA
A0A0A6YW28	Usp4	6	6	3	0	5	7	6	0	0	0	NA	Ubiquitin carboxyl-terminal hydrolase OS=Mus musculus OX=10090 GN=Usp4 PE=1 SV=1
A2BIN0	Mup11	0	0	3	0	2	3	1	0	0	0	NA	Major urinary protein 11 OS=Mus musculus OX=10090 GN=Mup9 PE=3 SV=1
B8JI96	Mup14	0	0	3	0	2	3	1	0	0	0	NA	Major urinary protein 14 (Fragment) OS=Mus musculus OX=10090 GN=Mup14 PE=1 SV=1
A2CEL1	Mup1	0	0	3	0	2	3	1	0	0	0	NA	Major urinary protein 1 OS=Mus musculus OX=10090 GN=Mup1 PE=3 SV=1
A2AKN9	Mup2	0	0	3	0	2	3	1	0	0	0	NA	Major urinary protein 2 OS=Mus musculus OX=10090 GN=Mup2 PE=1 SV=1
A2CEK7	Mup14	0	0	3	0	2	3	1	0	0	0	NA	Major urinary protein 12 OS=Mus musculus OX=10090 GN=Mup14 PE=3 SV=1
A9R9W0	Mup15	0	0	3	0	2	3	1	0	0	0	NA	Major urinary protein 15 OS=Mus musculus OX=10090 GN=Mup15 PE=3 SV=1
J3QMG3	Vdac3	5	3	1	0	8	3	0	0	0	0	NA	NA
A0A1W2P7U7	Pwp1	0	0	2	0	0	0	0	0	0	0	NA	NA
A0A2R8W753	Rangap1	0	0	1	0	0	0	1	0	0	0	NA	Ran GTPase-activating protein 1 (Fragment) OS=Mus musculus OX=10090 GN=Rangap1 PE=1 SV=1
A0A2R8VHK9	Rangap1	0	0	1	0	0	0	1	0	0	0	NA	Ran GTPase-activating protein 1 (Fragment) OS=Mus musculus OX=10090 GN=Rangap1 PE=1 SV=1
Q9D4T3	Pelp1	0	0	1	0	0	0	0	0	0	0	NA	NA
F7CXJ2	Dnajc8	0	0	1	0	0	0	1	0	0	0	NA	DnaJ homolog subfamily C member 8 (Fragment) OS=Mus musculus OX=10090 GN=Dnajc8 PE=1 SV=1
K4DI63	Creg1	0	0	1	0	0	0	0	0	0	0	NA	NA
F6SGT4	Exosc8	0	0	1	0	0	0	0	0	0	0	NA	NA
D3YYN3	Exosc8	0	0	1	0	0	0	0	0	0	0	NA	NA
A0A1B0GSR4	Ruvbl2	0	0	1	0	0	0	0	0	0	0	NA	NA
E9PX09	Carns1	0	0	1	0	0	0	0	0	0	0	NA	NA
A0A2I3BQK1	Cyrib	0	0	1	0	0	0	0	0	0	0	NA	NA
E9Q3Q7	Skp1	0	0	1	0	0	0	0	0	0	0	NA	NA
A0A0A6YW87	Cnih4	0	0	1	0	0	0	0	0	0	0	NA	NA
A2AMD0	Larp7-ps	0	0	1	0	0	0	0	0	0	0	NA	NA
A0A2I3BRD2	Ano6	0	0	1	0	0	0	0	0	0	0	NA	NA
A0A2I3BPY8	Ano6	0	0	1	0	0	0	0	0	0	0	NA	NA
D6RGT1	Tamm41	0	0	1	0	0	0	0	0	0	0	NA	NA
G3UWL8	Tamm41	0	0	1	0	0	0	0	0	0	0	NA	NA
F6RWR5	Gstp3	0	0	1	0	5	0	0	0	0	0	NA	NA
F6VP43	Pcnx3	0	0	1	0	0	0	0	0	0	0	NA	NA
A0A0J9YUY4	Ube3a	0	0	1	0	0	0	0	0	0	0	NA	NA
A0A0U1RQ72	Gpi1	0	0	1	0	0	0	0	0	0	0	NA	NA
A0A0G2JFV4	Rnf115	0	0	1	0	0	0	0	0	0	0	NA	NA
E0CYH4	Wdr26	0	0	1	0	0	0	0	0	0	0	NA	NA
A0A087WP13	Plekha6	0	0	2	0	3	5	0	0	0	0	NA	NA
A2ANL9	Tenm1	0	0	1	0	0	0	0	0	0	0	NA	NA
D3Z365	Hk1	1	0	1	0	0	1	0	0	0	0	NA	NA
E9QME5	Trim33	0	0	1	0	2	0	3	0	0	0	NA	E3 ubiquitin-protein ligase TRIM33 OS=Mus musculus OX=10090 GN=Trim33 PE=1 SV=1
Q3TTL2	Kif2c	2	0	1	0	1	4	0	0	0	0	NA	NA
A0A1L1SVK0	Pafah1b2	0	0	1	0	1	0	0	0	0	0	NA	NA
B8JJC1	Tdp1	0	0	1	0	0	0	0	0	0	0	NA	NA
Q8BSL0	Zkscan8	0	0	1	0	0	0	0	0	0	0	NA	NA
Q3TG45	Psmd8	0	0	1	0	0	0	0	0	0	0	NA	NA
B1ART1	Vps13d	0	0	1	0	0	0	0	0	0	0	NA	NA
B1ART2	Vps13d	0	0	1	0	0	0	0	0	0	0	NA	NA
V9GX23	Vps13d	0	0	1	0	0	0	0	0	0	0	NA	NA
R4GML4	Cntrl	0	1	1	0	0	2	0	0	0	0	NA	NA
A2AK40	Slc30a4	0	0	1	0	0	0	0	0	0	0	NA	NA
D3Z7M9	Anp32a	0	0	1	0	0	0	0	0	0	0	NA	NA
E9Q3P4	Cenpf	0	0	1	0	0	0	0	0	0	0	NA	NA
E9PY14	Cenpf	0	0	1	0	0	0	0	0	0	0	NA	NA
A0A3Q4EHR0	Rhoq	0	0	1	0	0	0	0	0	0	0	NA	NA
E9PZ53	Naa16	0	0	1	0	0	0	0	0	0	0	NA	NA
D3YU23	Adgrl3	0	0	1	0	0	0	0	0	0	0	NA	NA
D3Z3X6	Adgrl3	0	0	1	0	0	0	0	0	0	0	NA	NA
H3BIZ7	Frmd4a	1	0	1	0	1	0	0	0	0	0	NA	NA
G5E8J9	Scyl2	235	206	0	0	242	191	39	0	0	0	NA	SCY1-like protein 2 OS=Mus musculus OX=10090 GN=Scyl2 PE=1 SV=1
D3Z6I8	Tpm3	148	143	0	0	203	185	149	0	0	0	NA	Tropomyosin alpha-3 chain OS=Mus musculus OX=10090 GN=Tpm3 PE=1 SV=1
A0A0G2JFV5	Lrrfip2	188	187	0	0	216	158	0	0	0	0	NA	NA
A0A2R8VHF9	Myh11	109	0	0	0	101	103	0	0	0	0	NA	NA
A0A338P6K2	Myh11	109	0	0	0	101	103	0	0	0	0	NA	NA
E9QPE7	Myh11	109	0	0	0	101	103	0	0	0	0	NA	NA
A0A1L1SSC0	Lrrfip2	81	77	0	0	92	69	82	0	0	0	NA	Leucine-rich repeat flightless-interacting protein 2 OS=Mus musculus OX=10090 GN=Lrrfip2 PE=1 SV=1
[truncated: 4,384 more rows]

## Sheet: sti_results
Accession	Gene	#Spec LF-VECT-stimu-1	#Spec LF-VECT-stimu-2	#Spec LF-VECTOR-stimu-3	#Spec LF-WT-stimu-1	#Spec LF-WT-stimu-2	#Spec LF-WT-stimu-3	PTM	Description.y
A0A0R4J049	Prmt5	1585	1343	2192	492	639	912	Carbamidomethylation; Acetylation (Protein N-term); Oxidation (M)	Protein arginine N-methyltransferase 5 OS=Mus musculus OX=10090 GN=Prmt5 PE=1 SV=1
K3W4L0	Myo18a	0	0	693	272	0	337	Carbamidomethylation; Oxidation (M)	Unconventional myosin-XVIIIa OS=Mus musculus OX=10090 GN=Myo18a PE=1 SV=1
B2RRE2	Myo18a	0	0	0	272	0	337	Carbamidomethylation; Oxidation (M)	NA
E9QAX2	Myo18a	0	0	0	272	0	337	Carbamidomethylation; Oxidation (M)	NA
A0A1C7ZN10	Myo18a	1259	1087	673	267	280	331	Carbamidomethylation; Oxidation (M)	Unconventional myosin-XVIIIa OS=Mus musculus OX=10090 GN=Myo18a PE=1 SV=1
A0A0A6YY64	Pfkfb3	555	473	678	227	253	253	Carbamidomethylation; Oxidation (M)	6-phosphofructo-2-kinase/fructose-2 6-biphosphatase 3 OS=Mus musculus OX=10090 GN=Pfkfb3 PE=1 SV=1
A2AUP1	Pfkfb3	555	473	678	227	253	253	Carbamidomethylation; Oxidation (M)	6-phosphofructo-2-kinase/fructose-2 6-biphosphatase 3 OS=Mus musculus OX=10090 GN=Pfkfb3 PE=1 SV=1
Q3U3S6	Pfkfb3	561	473	685	223	253	0	NA	6-phosphofructo-2-kinase/fructose-2 6-biphosphatase 3 splice variant 4 OS=Mus musculus OX=10090 GN=Pfkfb3 PE=1 SV=1
Q3U2G2	Hspa4	16	12	6	156	299	38	Carbamidomethylation; Oxidation (M)	Heat shock 70 kDa protein 4 OS=Mus musculus OX=10090 GN=Hspa4 PE=1 SV=1
Q99NF7	Ppm1b	660	562	611	221	207	166	Carbamidomethylation; Oxidation (M)	Ppm1b protein OS=Mus musculus OX=10090 GN=Ppm1b PE=1 SV=1
B2RXM2	Gm6793	135	119	122	112	115	95	Carbamidomethylation; Acetylation (Protein N-term); Oxidation (M)	EG627828 protein OS=Mus musculus OX=10090 GN=Gm6793 PE=1 SV=1
Q923F1	Clns1a	429	362	437	161	187	231	Acetylation (Protein N-term); Oxidation (M)	Chloride channel nucleotide-sensitive 1A OS=Mus musculus OX=10090 GN=Clns1a PE=1 SV=1
A0A0G2JEP4	Lrrfip2	0	0	0	84	116	111	Carbamidomethylation; Oxidation (M)	NA
A2AL12	Hnrnpa3	124	106	109	85	97	0	NA	Heterogeneous nuclear ribonucleoprotein A3 OS=Mus musculus OX=10090 GN=Hnrnpa3 PE=1 SV=1
Q5EBP8	Hnrnpa1	0	97	0	92	110	44	Carbamidomethylation; Acetylation (Protein N-term); Oxidation (M)	NA
A0A0R4J169	Lrrfip2	0	0	0	0	0	0	NA	NA
Q3TH01	H2-K1	0	0	0	127	113	68	Carbamidomethylation; Oxidation (M)	NA
G3X956	Supt16	49	73	54	77	136	39	Carbamidomethylation; Acetylation (Protein N-term); Oxidation (M)	Suppressor of Ty 16 OS=Mus musculus OX=10090 GN=Supt16 PE=1 SV=1
E9Q7Q3	Tpm3	217	198	0	61	75	50	Acetylation (Protein N-term); Oxidation (M)	NA
Q9DAY9	Npm1	83	84	56	71	68	45	Carbamidomethylation; Acetylation (Protein N-term); Oxidation (M)	Nucleophosmin OS=Mus musculus OX=10090 GN=Npm1 PE=1 SV=1
A0A075B5P4	Ighg1	79	169	166	295	216	396	Carbamidomethylation; Acetylation (Protein N-term); Oxidation (M)	Ig gamma-1 chain C region secreted form (Fragment) OS=Mus musculus OX=10090 GN=Ighg1 PE=1 SV=1
A0A0A6YWR2	Ighg1	79	169	166	295	216	396	Carbamidomethylation; Acetylation (Protein N-term); Oxidation (M)	Ig gamma-1 chain C region secreted form (Fragment) OS=Mus musculus OX=10090 GN=Ighg1 PE=1 SV=1
Q8C2Q7	Hnrnph1	123	124	112	44	56	46	Carbamidomethylation; Acetylation (Protein N-term); Oxidation (M)	Heterogeneous nuclear ribonucleoprotein H OS=Mus musculus OX=10090 GN=Hnrnph1 PE=1 SV=1
B2M1R6	Hnrnpk	153	119	70	68	57	34	Carbamidomethylation; Oxidation (M)	Heterogeneous nuclear ribonucleoprotein K OS=Mus musculus OX=10090 GN=Hnrnpk PE=1 SV=1
Q8C845	Efhd2	26	40	24	60	42	36	Oxidation (M)	EF-hand domain-containing protein D2 OS=Mus musculus OX=10090 GN=Efhd2 PE=1 SV=1
Q8CFQ9	Fus	94	82	86	69	64	59	Carbamidomethylation; Oxidation (M)	Fusion derived from t(1216) malignant liposarcoma (Human) OS=Mus musculus OX=10090 GN=Fus PE=1 SV=1
A0A286YDA2	Nolc1	47	60	0	70	36	20	NA	NA
A0A286YDT3	Nolc1	0	0	0	70	36	20	NA	NA
A0A286YDV7	Nolc1	46	0	35	70	36	20	NA	Nucleolar and coiled-body phosphoprotein 1 (Fragment) OS=Mus musculus OX=10090 GN=Nolc1 PE=1 SV=1
Q8BQ46	Taf15	24	33	21	54	38	19	Carbamidomethylation; Oxidation (M)	TAF15 RNA polymerase II TATA box binding protein (TBP)-associated factor OS=Mus musculus OX=10090 GN=Taf15 PE=1 SV=1
A3KFU5	Pabpc4	81	76	79	23	29	20	Carbamidomethylation	Polyadenylate-binding protein OS=Mus musculus OX=10090 GN=Pabpc4 PE=1 SV=1
Q6PHQ9	Pabpc4	81	76	79	23	29	20	Carbamidomethylation	Polyadenylate-binding protein OS=Mus musculus OX=10090 GN=Pabpc4 PE=1 SV=1
B8JK33	Hnrnpm	0	0	0	58	0	0	NA	NA
B8JK32	Hnrnpm	0	0	0	58	0	0	NA	NA
Q9CPX4	Ftl1	7	0	0	40	56	26	Oxidation (M)	NA
F6YVP7	Rps18-ps6	57	50	10	71	59	21	Acetylation (Protein N-term); Oxidation (M)	Predicted gene 10260 OS=Mus musculus OX=10090 GN=Gm10260 PE=3 SV=2
Q20BD0	Hnrnpab	55	47	47	47	39	19	Carbamidomethylation; Oxidation (M)	Heterogeneous nuclear ribonucleoprotein A/B OS=Mus musculus OX=10090 GN=Hnrnpab PE=1 SV=1
B1ASP2	Jak1	282	207	141	49	38	59	Carbamidomethylation; Oxidation (M)	Tyrosine-protein kinase OS=Mus musculus OX=10090 GN=Jak1 PE=1 SV=1
A2AMW0	Capzb	176	158	160	30	48	50	Carbamidomethylation; Oxidation (M)	F-actin-capping protein subunit beta OS=Mus musculus OX=10090 GN=Capzb PE=1 SV=1
G5E8R2	Tpm1	115	127	0	30	36	22	Acetylation (Protein N-term); Oxidation (M)	NA
Q8BVQ9	Psmc2	72	68	81	36	41	32	Carbamidomethylation; Oxidation (M)	26S proteasome regulatory subunit 7 OS=Mus musculus OX=10090 GN=Psmc2 PE=1 SV=1
A2AGN7	Psmc3	0	0	0	38	38	0	NA	NA
A0A0A0MQF6	Gapdh	77	64	30	71	61	41	Carbamidomethylation; Oxidation (M)	Glyceraldehyde-3-phosphate dehydrogenase OS=Mus musculus OX=10090 GN=Gapdh PE=1 SV=1
H7BX95	Srsf1	117	88	104	45	42	25	Carbamidomethylation; Acetylation (Protein N-term)	Serine/arginine-rich-splicing factor 1 OS=Mus musculus OX=10090 GN=Srsf1 PE=1 SV=1
G5E924	Hnrnpl	57	57	48	56	46	36	Carbamidomethylation; Oxidation (M)	Heterogeneous nuclear ribonucleoprotein L (Fragment) OS=Mus musculus OX=10090 GN=Hnrnpl PE=1 SV=1
Q8BTS0	Ddx5	124	98	66	47	41	41	Carbamidomethylation; Oxidation (M)	DEAD (Asp-Glu-Ala-Asp) box polypeptide 5 OS=Mus musculus OX=10090 GN=Ddx5 PE=1 SV=1
B1ATZ0	NA	0	0	0	34	39	50	Carbamidomethylation; Oxidation (M)	NA
B1ATZ1	Hgs	0	0	0	34	39	50	Carbamidomethylation; Oxidation (M)	NA
Q3UMA3	Hgs	0	0	0	34	39	50	Carbamidomethylation; Oxidation (M)	NA
G5E866	Sf3b1	113	91	53	13	22	18	NA	Splicing factor 3B subunit 1 OS=Mus musculus OX=10090 GN=Sf3b1 PE=1 SV=1
Q5RKN9	Capza1	169	128	118	27	33	32	Carbamidomethylation; Acetylation (Protein N-term); Oxidation (M)	F-actin-capping protein subunit alpha OS=Mus musculus OX=10090 GN=Capza1 PE=1 SV=1
A0A0B4J1I0	Igkv1-110	23	0	59	146	0	0	NA	Immunoglobulin kappa variable 1-110 (Fragment) OS=Mus musculus OX=10090 GN=Igkv1-110 PE=4 SV=5
A0A494BAA4	Ndfip1	27	16	21	43	46	61	Oxidation (M)	NEDD4 family-interacting protein 1 OS=Mus musculus OX=10090 GN=Ndfip1 PE=1 SV=1
A0A0A0MQA5	Tuba4a	79	69	128	37	37	36	Carbamidomethylation; Oxidation (M)	Tubulin alpha chain (Fragment) OS=Mus musculus OX=10090 GN=Tuba4a PE=1 SV=1
E9Q9M1	Nt5c2	0	0	0	0	0	0	NA	NA
A0A494B9X3	Nt5c2	0	0	0	0	0	0	NA	NA
A1BN54	Actn1	86	92	33	89	35	0	NA	Alpha actinin 1a OS=Mus musculus OX=10090 GN=Actn1 PE=1 SV=1
G3UW85	Erh	76	63	7	31	36	0	NA	Enhancer of rudimentary homolog OS=Mus musculus OX=10090 GN=Erh PE=1 SV=1
F6RJ39	Acin1	46	42	39	17	13	15	Carbamidomethylation	Apoptotic chromatin condensation inducer in the nucleus (Fragment) OS=Mus musculus OX=10090 GN=Acin1 PE=1 SV=1
A0A0U1RQ96	Actg2	0	235	0	0	0	0	NA	NA
E9Q3Z5	Svil	307	301	43	23	17	5	NA	Supervillin OS=Mus musculus OX=10090 GN=Svil PE=1 SV=1
A0A1B0GS91	Svil	0	0	43	0	17	5	NA	Supervillin OS=Mus musculus OX=10090 GN=Svil PE=1 SV=1
G3UZI2	Syncrip	0	0	0	20	29	15	Carbamidomethylation	NA
G3V018	Syncrip	0	0	0	20	29	15	Carbamidomethylation	NA
A0A0R4J259	Syncrip	0	0	34	20	29	15	Carbamidomethylation	Heterogeneous nuclear ribonucleoprotein Q OS=Mus musculus OX=10090 GN=Syncrip PE=1 SV=1
A2AFJ1	Rbbp7	0	0	0	0	32	29	Carbamidomethylation; Acetylation (Protein N-term); Oxidation (M)	NA
B1AQR8	Lgals9	12	11	7	28	19	31	Carbamidomethylation; Oxidation (M)	Galectin OS=Mus musculus OX=10090 GN=Lgals9 PE=1 SV=1
G3X9T7	Lgals9	12	11	7	28	19	31	Carbamidomethylation; Oxidation (M)	Galectin OS=Mus musculus OX=10090 GN=Lgals9 PE=1 SV=1
A2AI52	Usp8	0	0	0	32	34	48	Carbamidomethylation; Oxidation (M)	NA
S4R1M2	Safb	11	9	15	22	18	9	Carbamidomethylation; Acetylation (Protein N-term)	Scaffold attachment factor B1 OS=Mus musculus OX=10090 GN=Safb PE=1 SV=1
Q5SUT0	Ewsr1	39	39	43	21	23	26	Carbamidomethylation; Oxidation (M)	RNA-binding protein EWS OS=Mus musculus OX=10090 GN=Ewsr1 PE=1 SV=1
Q5SUS9	Ewsr1	39	39	43	21	23	26	Carbamidomethylation; Oxidation (M)	RNA-binding protein EWS OS=Mus musculus OX=10090 GN=Ewsr1 PE=1 SV=1
A0A0R4J260	Otud4	258	214	194	20	8	0	NA	OTU domain-containing protein 4 OS=Mus musculus OX=10090 GN=Otud4 PE=1 SV=1
A0A1W2P7Q9	Myl6	171	154	19	32	39	4	Carbamidomethylation; Oxidation (M)	Myosin light polypeptide 6 OS=Mus musculus OX=10090 GN=Myl6 PE=1 SV=1
A0A1W2P6F6	Myl6	171	154	19	32	39	4	Carbamidomethylation; Oxidation (M)	Myosin light polypeptide 6 OS=Mus musculus OX=10090 GN=Myl6 PE=1 SV=1
Q9DCC5	Cbx3	29	26	11	63	38	6	Carbamidomethylation; Oxidation (M)	Cbx3 protein OS=Mus musculus OX=10090 GN=Cbx3 PE=1 SV=1
A0A171KXD3	Prmt1	0	0	0	35	43	57	Carbamidomethylation; Oxidation (M)	NA
Q3TMX0	Sdcbp	0	5	0	39	34	50	Carbamidomethylation; Acetylation (Protein N-term); Oxidation (M)	NA
Q3UH59	Myh10	165	159	0	19	0	7	NA	NA
Q5SV64	Myh10	165	159	0	19	0	7	NA	NA
A2AGH5	NA	10	8	5	27	23	14	Carbamidomethylation	Predicted gene 20489 OS=Mus musculus OX=10090 GN=Gm20489 PE=4 SV=1
G3UZ34	Eftud2	0	0	39	23	29	8	Carbamidomethylation	116 kDa U5 small nuclear ribonucleoprotein component OS=Mus musculus OX=10090 GN=Eftud2 PE=1 SV=1
A2AH85	Eftud2	78	61	39	23	29	8	Carbamidomethylation	116 kDa U5 small nuclear ribonucleoprotein component OS=Mus musculus OX=10090 GN=Eftud2 PE=1 SV=1
A0A2R8VHP3	Gm5478	64	53	55	42	57	81	NA	Predicted pseudogene 5478 OS=Mus musculus OX=10090 GN=Gm5478 PE=1 SV=1
Q921K2	Parp1	14	20	10	15	11	9	Carbamidomethylation	Poly [ADP-ribose] polymerase OS=Mus musculus OX=10090 GN=Parp1 PE=1 SV=1
Q8R5L1	C1qbp	42	36	36	25	22	18	Oxidation (M)	Complement component 1 Q subcomponent-binding protein mitochondrial OS=Mus musculus OX=10090 GN=C1qbp PE=1 SV=1
F8WGL3	Cfl1	55	53	3	42	32	5	Carbamidomethylation; Acetylation (Protein N-term)	Cofilin-1 OS=Mus musculus OX=10090 GN=Cfl1 PE=1 SV=1
Q8BGJ5	Ptbp1	38	36	21	23	27	14	Acetylation (Protein N-term); Oxidation (M)	MCG13402 isoform CRA_a OS=Mus musculus OX=10090 GN=Ptbp1 PE=1 SV=1
Q922I7	Ptbp1	0	36	21	23	27	14	Acetylation (Protein N-term); Oxidation (M)	MCG13402 isoform CRA_c OS=Mus musculus OX=10090 GN=Ptbp1 PE=1 SV=1
Q8CB58	Ptbp1	0	0	0	0	0	14	Acetylation (Protein N-term); Oxidation (M)	NA
E9Q133	Cct3	0	0	18	28	27	19	Carbamidomethylation; Oxidation (M)	T-complex protein 1 subunit gamma OS=Mus musculus OX=10090 GN=Cct3 PE=1 SV=1
E9Q3X0	Mvp	89	72	125	21	40	60	Carbamidomethylation; Oxidation (M)	Major vault protein OS=Mus musculus OX=10090 GN=Mvp PE=1 SV=1
A0A3Q4L335	Srsf7	0	35	40	30	29	17	Carbamidomethylation	MCG17902 isoform CRA_e OS=Mus musculus OX=10090 GN=Srsf7 PE=1 SV=1
A0A3Q4L393	Srsf7	55	35	40	30	29	17	Carbamidomethylation	Serine/arginine-rich-splicing factor 7 OS=Mus musculus OX=10090 GN=Srsf7 PE=1 SV=1
A0A3Q4EH04	Srsf7	0	35	40	30	29	17	Carbamidomethylation	MCG17902 isoform CRA_d OS=Mus musculus OX=10090 GN=Srsf7 PE=1 SV=1
Q6ZWQ9	Myl12a	102	82	4	14	20	0	NA	MCG5400 OS=Mus musculus OX=10090 GN=Myl12a PE=1 SV=1
E9QN08	Eef1d	25	30	26	25	21	13	Acetylation (Protein N-term); Oxidation (M)	Elongation factor 1-delta (Fragment) OS=Mus musculus OX=10090 GN=Eef1d PE=1 SV=1
Q80T06	Eef1d	25	30	26	25	21	13	Acetylation (Protein N-term); Oxidation (M)	Elongation factor 1-delta OS=Mus musculus OX=10090 GN=Eef1d PE=1 SV=1
A0A0R4J1H6	Golga3	0	0	0	6	7	30	NA	NA
E9QP99	Golga3	255	208	292	6	7	30	NA	Golgin subfamily A member 3 OS=Mus musculus OX=10090 GN=Golga3 PE=1 SV=1
Q3U741	Ddx17	59	49	43	24	23	21	Carbamidomethylation; Oxidation (M)	DEAD (Asp-Glu-Ala-Asp) box polypeptide 17 isoform CRA_a OS=Mus musculus OX=10090 GN=Ddx17 PE=1 SV=1
D3YWT1	Hnrnph3	15	16	10	13	10	6	Oxidation (M)	Heterogeneous nuclear ribonucleoprotein H3 OS=Mus musculus OX=10090 GN=Hnrnph3 PE=1 SV=1
D3Z3N4	Hnrnph3	15	16	10	13	10	6	Oxidation (M)	Heterogeneous nuclear ribonucleoprotein H3 OS=Mus musculus OX=10090 GN=Hnrnph3 PE=1 SV=1
H3BK44	Mia2	4	3	2	16	15	0	NA	Melanoma inhibitory activity protein 2 OS=Mus musculus OX=10090 GN=Mia2 PE=1 SV=1
E9PY90	Mia2	4	3	2	16	15	0	NA	Melanoma inhibitory activity protein 2 OS=Mus musculus OX=10090 GN=Mia2 PE=1 SV=1
H3BK48	Mia2	4	3	2	16	15	35	Carbamidomethylation; Oxidation (M)	Melanoma inhibitory activity protein 2 OS=Mus musculus OX=10090 GN=Mia2 PE=1 SV=1
E9Q3S2	Mia2	4	3	2	16	15	0	NA	Melanoma inhibitory activity protein 2 OS=Mus musculus OX=10090 GN=Mia2 PE=1 SV=1
H3BKH2	Mia2	4	3	2	16	15	35	Carbamidomethylation; Oxidation (M)	Melanoma inhibitory activity protein 2 OS=Mus musculus OX=10090 GN=Mia2 PE=1 SV=1
H3BJS0	Mia2	4	3	2	16	15	0	NA	Melanoma inhibitory activity protein 2 OS=Mus musculus OX=10090 GN=Mia2 PE=1 SV=1
A0A1W2P711	Mia2	4	3	2	16	15	0	NA	Melanoma inhibitory activity protein 2 OS=Mus musculus OX=10090 GN=Mia2 PE=1 SV=2
A2A547	Rpl19	23	26	21	23	3	9	NA	Ribosomal protein L19 OS=Mus musculus OX=10090 GN=Rpl19 PE=1 SV=1
E9Q1Z0	Krt90	51	30	44	37	35	47	Carbamidomethylation; Oxidation (M)	Keratin 90 OS=Mus musculus OX=10090 GN=Krt90 PE=1 SV=1
Q3UDC3	Tom1	3	2	4	15	19	34	Acetylation (Protein N-term); Oxidation (M)	Target of Myb protein 1 OS=Mus musculus OX=10090 GN=Tom1 PE=1 SV=1
E9QNN1	Dhx9	32	30	31	16	29	14	Carbamidomethylation	ATP-dependent RNA helicase A OS=Mus musculus OX=10090 GN=Dhx9 PE=1 SV=1
Q8VHM5	Hnrnpr	20	22	16	15	20	8	Carbamidomethylation	Heterogeneous nuclear ribonucleoprotein R OS=Mus musculus OX=10090 GN=Hnrnpr PE=1 SV=1
E9QP00	Tra2a	32	32	32	15	15	8	Acetylation (Protein N-term)	Transformer-2 protein homolog alpha OS=Mus musculus OX=10090 GN=Tra2a PE=1 SV=1
Q3U7K7	Trim21	46	33	22	30	18	27	Carbamidomethylation; Oxidation (M)	E3 ubiquitin-protein ligase TRIM21 OS=Mus musculus OX=10090 GN=Trim21 PE=1 SV=1
A0A087WRN1	Bclaf1	0	0	0	0	0	0	NA	NA
F8WI22	Bclaf1	146	120	115	11	14	27	NA	Bcl-2-associated transcription factor 1 OS=Mus musculus OX=10090 GN=Bclaf1 PE=1 SV=1
Q8C266	Rab5c	7	0	2	32	31	35	Oxidation (M)	Ras-related protein Rab-5C OS=Mus musculus OX=10090 GN=Rab5c PE=1 SV=1
A0A494B9G8	H2-K1	0	0	0	36	36	16	Carbamidomethylation; Oxidation (M)	NA
F8WJK8	St13	0	0	2	33	35	5	NA	Hsc70-interacting protein OS=Mus musculus OX=10090 GN=St13 PE=1 SV=1
A0A3B2WDD2	Rpl10a	0	0	28	19	14	15	Carbamidomethylation	Ribosomal protein OS=Mus musculus OX=10090 GN=Rpl10a PE=1 SV=1
Q5XJF6	Rpl10a	36	32	28	19	14	15	Carbamidomethylation	Ribosomal protein OS=Mus musculus OX=10090 GN=Rpl10a PE=1 SV=1
A0A3B2WBL1	Rpl10a	36	32	28	19	14	15	Carbamidomethylation	Ribosomal protein OS=Mus musculus OX=10090 GN=Rpl10a PE=1 SV=1
Q497W9	Dhx15	0	0	0	15	16	0	NA	NA
Q91V35	Ptpra	0	0	0	9	14	17	Carbamidomethylation	NA
B7ZNL2	Nap1l4	8	6	8	17	9	9	Acetylation (Protein N-term)	Nap1l4 protein OS=Mus musculus OX=10090 GN=Nap1l4 PE=1 SV=1
S4R1M0	Ptprc	8	7	1	13	17	30	Carbamidomethylation; Oxidation (M)	Receptor-type tyrosine-protein phosphatase C OS=Mus musculus OX=10090 GN=Ptprc PE=1 SV=1
A3KGL9	Hmgn2	26	22	1	25	20	0	NA	Non-histone chromosomal protein HMG-17 OS=Mus musculus OX=10090 GN=Hmgn2 PE=1 SV=1
F6W687	Hmgn2	26	22	1	25	20	0	NA	Non-histone chromosomal protein HMG-17 (Fragment) OS=Mus musculus OX=10090 GN=Hmgn2 PE=1 SV=1
E9QAI5	Cad	29	48	23	22	0	0	NA	CAD protein OS=Mus musculus OX=10090 GN=Cad PE=1 SV=1
Q3UGN9	Stam	0	0	0	9	13	15	Oxidation (M)	NA
A2ACG7	Rpn2	14	11	0	0	6	7	NA	NA
A2AWF9	Ptprj	0	0	0	10	10	11	NA	NA
E9Q4S7	Ptprj	0	0	0	10	10	11	NA	NA
A2AWF8	Ptprj	0	0	0	10	10	11	NA	NA
A0A3B2WCD8	Khsrp	23	25	23	18	12	7	NA	Far upstream element-binding protein 2 OS=Mus musculus OX=10090 GN=Khsrp PE=1 SV=1
F8WI35	H3f3a	7	5	2	44	34	13	NA	Histone H3 OS=Mus musculus OX=10090 GN=H3f3a PE=1 SV=1
A0A1W2P768	H3c14	7	5	2	44	34	13	NA	Histone H3.2 OS=Mus musculus OX=10090 GN=Hist2h3c1 PE=1 SV=1
B1AU75	Nasp	4	3	5	12	9	2	NA	Nuclear autoantigenic sperm protein OS=Mus musculus OX=10090 GN=Nasp PE=1 SV=1
A0A1B0GSR9	Ldha	25	28	0	17	20	32	Carbamidomethylation; Oxidation (M)	NA
Q564E2	Ldha	25	28	59	17	20	32	Carbamidomethylation; Oxidation (M)	L-lactate dehydrogenase OS=Mus musculus OX=10090 GN=Ldha PE=1 SV=1
A0A0R4J1G9	Steap3	4	5	0	19	23	28	Carbamidomethylation; Acetylation (Protein N-term); Oxidation (M)	NA
A0A2I3BRM6	Hnrnpc	21	17	21	0	0	0	NA	Heterogeneous nuclear ribonucleoproteins C1/C2 (Fragment) OS=Mus musculus OX=10090 GN=Hnrnpc PE=1 SV=1
Q3TF41	Nap1l1	20	13	12	14	17	6	NA	Nucleosome assembly protein 1-like 1 OS=Mus musculus OX=10090 GN=Nap1l1 PE=1 SV=1
Q8BSH9	Nap1l1	20	13	12	14	17	6	NA	Nucleosome assembly protein 1-like 1 OS=Mus musculus OX=10090 GN=Nap1l1 PE=1 SV=1
A0A0G2JDW7	Rps27	0	14	0	0	13	1	Carbamidomethylation	NA
A0A0U1RNJ1	Fasn	0	10	1	18	0	0	NA	Fatty acid synthase OS=Mus musculus OX=10090 GN=Fasn PE=1 SV=1
Q3UJB0	Sf3b2	90	72	57	11	16	11	NA	Splicing factor 3b subunit 2 OS=Mus musculus OX=10090 GN=Sf3b2 PE=1 SV=1
A0A1Y7VMH7	Kidins220	0	0	0	0	12	0	NA	NA
A0A1Y7VME9	Kidins220	0	0	0	12	12	28	Carbamidomethylation; Oxidation (M)	NA
E9Q9B7	Kidins220	0	0	0	12	12	28	Carbamidomethylation; Oxidation (M)	NA
Q921R2	Rps13	29	26	0	19	15	1	NA	NA
A2AKU9	Atp5f1c	0	0	16	0	0	19	Carbamidomethylation; Oxidation (M)	ATP synthase subunit gamma OS=Mus musculus OX=10090 GN=Atp5c1 PE=1 SV=1
Q8C2Q8	Atp5f1c	23	17	16	9	15	19	Carbamidomethylation; Oxidation (M)	ATP synthase subunit gamma OS=Mus musculus OX=10090 GN=Atp5c1 PE=1 SV=1
F8WHL2	Copa	29	26	6	12	13	13	NA	Coatomer subunit alpha OS=Mus musculus OX=10090 GN=Copa PE=1 SV=1
A0A0R4J1C7	Mfap3	0	0	0	18	22	18	Carbamidomethylation	NA
A0A1B0GR18	Mob2	64	61	57	22	32	9	NA	MOB kinase activator 2 OS=Mus musculus OX=10090 GN=Mob2 PE=1 SV=1
E9Q696	Lck	15	9	5	11	13	17	Carbamidomethylation	Tyrosine-protein kinase OS=Mus musculus OX=10090 GN=Lck PE=1 SV=1
V9GX00	Il6st	1	1	1	12	16	26	Carbamidomethylation; Oxidation (M)	Interleukin-6 receptor subunit beta OS=Mus musculus OX=10090 GN=Il6st PE=1 SV=1
Q9D3L3	Snap23	0	0	0	9	8	10	Acetylation (Protein N-term); Oxidation (M)	NA
D3Z656	Synj1	97	84	24	18	13	17	Carbamidomethylation	Synaptojanin-1 OS=Mus musculus OX=10090 GN=Synj1 PE=1 SV=1
Q78ZM0	Snx3	0	0	0	14	15	0	NA	NA
Q5SXR6	Cltc	96	81	24	10	15	14	Carbamidomethylation	Clathrin heavy chain OS=Mus musculus OX=10090 GN=Cltc PE=1 SV=1
F6X2V9	Lsm14a	42	27	36	0	0	0	NA	Protein LSM14 homolog A (Fragment) OS=Mus musculus OX=10090 GN=Lsm14a PE=1 SV=2
Q91Z25	Arpc1b	57	53	65	15	14	8	Carbamidomethylation	Actin-related protein 2/3 complex subunit OS=Mus musculus OX=10090 GN=Arpc1b PE=1 SV=1
V9GX38	NA	0	0	0	13	18	0	NA	NA
Z4YJV4	Ogdh	4	3	3	19	20	14	Carbamidomethylation; Oxidation (M)	2-oxoglutarate dehydrogenase mitochondrial OS=Mus musculus OX=10090 GN=Ogdh PE=1 SV=1
G3X927	Ccdc9	16	17	24	7	4	8	NA	Coiled-coil domain-containing protein 9 OS=Mus musculus OX=10090 GN=Ccdc9 PE=1 SV=1
D3YW42	Ccdc9	16	17	24	7	4	8	NA	Coiled-coil domain-containing protein 9 OS=Mus musculus OX=10090 GN=Ccdc9 PE=1 SV=2
A2AWT6	Ubtf	16	12	40	11	52	7	NA	Nucleolar transcription factor 1 OS=Mus musculus OX=10090 GN=Ubtf PE=1 SV=1
A2AWT7	Ubtf	16	12	40	11	52	7	NA	Nucleolar transcription factor 1 OS=Mus musculus OX=10090 GN=Ubtf PE=1 SV=1
A2AWT5	Ubtf	0	12	0	11	52	7	NA	NA
A0A0R4J0N8	Cxcr4	0	0	0	10	12	9	NA	NA
A0A1W2P733	Mthfd1	36	19	21	16	13	11	NA	C-1-tetrahydrofolate synthase cytoplasmic OS=Mus musculus OX=10090 GN=Mthfd1 PE=1 SV=1
A0A2R8VI25	Pcbp2	0	0	0	0	0	9	Carbamidomethylation; Oxidation (M)	NA
Q3TT81	Pcbp2	18	0	0	0	0	9	Carbamidomethylation; Oxidation (M)	NA
A0A2R8VHP9	Pcbp2	18	0	0	0	0	9	Carbamidomethylation; Oxidation (M)	NA
B2M1R7	Pcbp2	20	15	11	11	12	9	Carbamidomethylation; Oxidation (M)	Poly(rC)-binding protein 2 OS=Mus musculus OX=10090 GN=Pcbp2 PE=1 SV=1
Q3TUE1	Fubp1	28	24	13	14	8	13	Carbamidomethylation	Far upstream element-binding protein 1 OS=Mus musculus OX=10090 GN=Fubp1 PE=1 SV=1
A0A0G2JGW9	Fubp1	28	24	13	14	8	13	Carbamidomethylation	Far upstream element-binding protein 1 OS=Mus musculus OX=10090 GN=Fubp1 PE=1 SV=1
A0A0G2JFY5	Fubp1	28	24	13	14	8	13	Carbamidomethylation	Far upstream element-binding protein 1 OS=Mus musculus OX=10090 GN=Fubp1 PE=1 SV=1
Q3UUU2	Fubp1	28	24	13	14	8	13	Carbamidomethylation	Far upstream element-binding protein 1 OS=Mus musculus OX=10090 GN=Fubp1 PE=1 SV=1
E9QN31	Nop2	6	8	4	9	0	0	NA	Probable 28S rRNA (cytosine-C(5))-methyltransferase OS=Mus musculus OX=10090 GN=Nop2 PE=1 SV=1
Q5M8M8	Rpl29	17	15	12	15	3	9	NA	60S ribosomal protein L29 OS=Mus musculus OX=10090 GN=Rpl29 PE=1 SV=1
Q5SXA5	Tom1l2	0	0	0	13	9	12	Oxidation (M)	NA
F6RT43	Ndfip2	1	1	1	9	9	18	Carbamidomethylation; Oxidation (M)	NEDD4 family-interacting protein 2 (Fragment) OS=Mus musculus OX=10090 GN=Ndfip2 PE=1 SV=1
M0QWK1	Ndfip2	1	1	1	9	9	18	Carbamidomethylation; Oxidation (M)	NEDD4 family-interacting protein 2 OS=Mus musculus OX=10090 GN=Ndfip2 PE=1 SV=1
A2AMV1	Mrto4	13	18	7	7	12	0	NA	Ribosome assembly factor mrt4 OS=Mus musculus OX=10090 GN=Mrto4 PE=1 SV=1
A8DUK4	Hbb-bs	16	8	4	22	10	7	Oxidation (M)	Beta-globin OS=Mus musculus OX=10090 GN=Hbb-bs PE=1 SV=1
E9Q223	Hbb-bs	0	8	4	0	10	7	Oxidation (M)	Hemoglobin beta adult s chain (Fragment) OS=Mus musculus OX=10090 GN=Hbb-bs PE=1 SV=1
Q3ULG5	Mcm6	9	6	4	10	7	3	NA	DNA helicase OS=Mus musculus OX=10090 GN=Mcm6 PE=1 SV=1
E9PX73	Ly9	0	0	0	0	0	0	NA	NA
D3YYM6	Rps5	36	35	8	24	18	11	Carbamidomethylation; Acetylation (Protein N-term)	40S ribosomal protein S5 (Fragment) OS=Mus musculus OX=10090 GN=Rps5 PE=1 SV=1
D3Z1S8	Rps5	36	35	8	24	18	11	Carbamidomethylation; Acetylation (Protein N-term)	40S ribosomal protein S5 (Fragment) OS=Mus musculus OX=10090 GN=Rps5 PE=1 SV=1
Q91V55	Rps5	36	35	8	24	18	11	Carbamidomethylation; Acetylation (Protein N-term)	40S ribosomal protein S5 OS=Mus musculus OX=10090 GN=Rps5 PE=1 SV=1
E9Q585	Slc4a1ap	57	54	53	0	13	16	Carbamidomethylation; Oxidation (M)	Solute carrier family 4 (anion exchanger) member 1 adaptor protein OS=Mus musculus OX=10090 GN=Slc4a1ap PE=1 SV=1
Q8C605	Pfkp	46	40	27	10	0	8	NA	ATP-dependent 6-phosphofructokinase OS=Mus musculus OX=10090 GN=Pfkp PE=1 SV=1
A0A494BAP2	Csnk1g3	0	0	0	13	13	16	Carbamidomethylation	NA
E9PWY9	Farsa	21	16	10	9	10	11	Acetylation (Protein N-term)	Phenylalanine--tRNA ligase alpha subunit OS=Mus musculus OX=10090 GN=Farsa PE=1 SV=1
Q6ZWZ6	Rps12	18	17	7	15	12	6	Carbamidomethylation	40S ribosomal protein S12 OS=Mus musculus OX=10090 GN=Rps12-ps3 PE=1 SV=1
F7AEH4	Rps12	18	17	7	15	12	6	Carbamidomethylation	40S ribosomal protein S12 OS=Mus musculus OX=10090 GN=Rps12 PE=1 SV=1
A2BGI8	Ppih	5	0	0	12	13	0	NA	NA
F8WJ41	Rps15a	0	0	0	13	9	0	NA	NA
A0A140LHA2	Bub3	11	8	13	9	10	16	Carbamidomethylation; Oxidation (M)	Mitotic checkpoint protein BUB3 OS=Mus musculus OX=10090 GN=Bub3 PE=1 SV=1
B1AU25	Aifm1	18	19	17	11	13	10	Oxidation (M)	Apoptosis-inducing factor 1 mitochondrial OS=Mus musculus OX=10090 GN=Aifm1 PE=1 SV=1
Q3TFP0	Srsf10	17	15	20	12	11	0	NA	Serine/arginine-rich-splicing factor 10 OS=Mus musculus OX=10090 GN=Srsf10 PE=1 SV=1
Q3TCU5	Tapbp	2	2	3	16	9	6	NA	Tapasin OS=Mus musculus OX=10090 GN=Tapbp PE=1 SV=1
G5E8H3	Ikzf1	22	16	22	12	5	5	NA	DNA-binding protein Ikaros OS=Mus musculus OX=10090 GN=Ikzf1 PE=1 SV=1
Q5SWT9	Ikzf1	22	16	22	12	5	5	NA	DNA-binding protein Ikaros OS=Mus musculus OX=10090 GN=Ikzf1 PE=1 SV=1
A0A0R4J008	Hdac2	19	9	31	0	8	9	Oxidation (M)	Histone deacetylase OS=Mus musculus OX=10090 GN=Hdac2 PE=1 SV=1
E9Q9C4	Ablim1	0	0	0	5	6	0	NA	NA
E9Q9C0	Ablim1	0	0	0	5	6	4	NA	NA
E9Q9C1	Ablim1	0	0	0	5	6	4	NA	NA
E9Q9C2	Ablim1	0	0	0	5	6	0	NA	NA
E9Q9C7	Ablim1	0	78	72	5	6	0	NA	Actin-binding LIM protein 1 OS=Mus musculus OX=10090 GN=Ablim1 PE=1 SV=1
E9QK41	Ablim1	0	0	0	5	6	0	NA	NA
E9Q9D1	Ablim1	0	80	72	5	6	0	NA	Actin-binding LIM protein 1 OS=Mus musculus OX=10090 GN=Ablim1 PE=1 SV=1
E9Q9D2	Ablim1	0	80	72	5	6	0	NA	Actin-binding LIM protein 1 OS=Mus musculus OX=10090 GN=Ablim1 PE=1 SV=1
E9Q030	Ablim1	0	0	0	5	6	0	NA	NA
E9Q9Q7	Ablim1	0	0	0	0	0	4	NA	NA
Q9JHF5	Tcirg1	0	0	0	0	4	0	NA	NA
Q91VB8	Hba-a1	20	11	11	30	14	8	Oxidation (M)	Alpha globin 1 OS=Mus musculus OX=10090 GN=Hba-a1 PE=1 SV=1
K3W4S5	Sema6a	0	0	0	7	8	12	Carbamidomethylation; Oxidation (M)	NA
D3YWM8	Sema6a	0	0	0	7	8	12	Carbamidomethylation; Oxidation (M)	NA
J7NUP1	Irgm1	6	4	0	13	9	14	Carbamidomethylation; Acetylation (Protein N-term)	NA
A0A0B4J1E2	Snw1	42	31	22	12	11	0	NA	SNW domain-containing protein 1 OS=Mus musculus OX=10090 GN=Snw1 PE=1 SV=1
A0A0R4J195	Rprd1b	9	16	0	16	1	0	NA	NA
Q9DCE9	Igtp	6	5	3	5	0	4	Oxidation (M)	Interferon gamma-induced GTPase OS=Mus musculus OX=10090 GN=Igtp PE=1 SV=1
Q6PFB2	Rcc1	6	8	2	9	15	5	NA	Rcc1 protein OS=Mus musculus OX=10090 GN=Rcc1 PE=1 SV=1
A2AU62	Raly	9	17	9	16	17	6	NA	RNA-binding protein Raly (Fragment) OS=Mus musculus OX=10090 GN=Raly PE=1 SV=1
A2AU61	Raly	0	17	9	16	17	0	NA	RNA-binding protein Raly (Fragment) OS=Mus musculus OX=10090 GN=Raly PE=1 SV=1
A8C1R4	Timd2	0	0	2	9	11	15	Carbamidomethylation	G9D3 protein OS=Mus musculus OX=10090 GN=Timd2 PE=2 SV=1
A0A494B9Z0	Fau	15	15	7	9	5	5	NA	40S ribosomal protein S30 OS=Mus musculus OX=10090 GN=Fau PE=1 SV=1
A0A494BBA8	Fau	15	15	7	9	5	5	NA	40S ribosomal protein S30 OS=Mus musculus OX=10090 GN=Fau PE=1 SV=1
Q642K5	Fau	15	15	7	9	5	5	NA	40S ribosomal protein S30 OS=Mus musculus OX=10090 GN=Fau PE=1 SV=1
Q9CQM8	Rpl21	34	0	11	0	0	6	Oxidation (M)	60S ribosomal protein L21 OS=Mus musculus OX=10090 GN=Rpl21 PE=1 SV=1
O88325	Naglu	0	0	0	5	11	12	NA	NA
A0A2I3BQF4	Rpl30	0	9	0	0	0	0	NA	NA
A0A0R4J256	Psmb9	7	0	6	7	8	0	NA	Proteasome subunit beta OS=Mus musculus OX=10090 GN=Psmb9 PE=1 SV=1
A0A087WQE6	Eloc	7	8	0	9	8	0	NA	NA
A0A087WNT1	Eloc	7	8	0	0	8	0	NA	NA
A2AQR0	Gpd2	3	4	0	12	6	9	NA	NA
Q6ZWZ7	Rpl17	29	22	13	13	5	4	NA	60S ribosomal protein L17 OS=Mus musculus OX=10090 GN=Rpl17 PE=1 SV=1
A0A0N4SW50	Tmem168	0	0	0	8	5	10	NA	NA
A0A1L1STE4	Ilf3	20	12	13	7	6	5	NA	Interleukin enhancer-binding factor 3 OS=Mus musculus OX=10090 GN=Ilf3 PE=1 SV=1
Q45VK5	Ilf3	0	12	0	0	6	5	NA	NA
G3UY42	Pabpn1	23	13	23	7	5	4	Carbamidomethylation; Acetylation (Protein N-term)	Polyadenylate-binding protein 2 OS=Mus musculus OX=10090 GN=Pabpn1 PE=1 SV=1
A0A0N4SVS6	Cnbp	11	11	0	6	4	0	NA	NA
A0A1L1SQA8	Rps25	17	14	1	13	9	2	NA	40S ribosomal protein S25 OS=Mus musculus OX=10090 GN=Rps25 PE=1 SV=1
A0A0B4J1E6	Fcgr2b	20	19	14	5	8	9	NA	Fc receptor IgG low affinity IIb OS=Mus musculus OX=10090 GN=Fcgr2b PE=1 SV=1
Q91XH6	Vti1b	0	0	0	9	7	12	Acetylation (Protein N-term)	NA
D3Z158	Qars1	14	11	9	10	0	8	NA	Glutamine--tRNA ligase OS=Mus musculus OX=10090 GN=Qars PE=1 SV=2
A0A2R8VKL5	Larp4	24	25	27	10	5	7	NA	La-related protein 4 OS=Mus musculus OX=10090 GN=Larp4 PE=1 SV=1
E9Q066	Larp4	24	25	27	10	5	7	NA	La-related protein 4 OS=Mus musculus OX=10090 GN=Larp4 PE=1 SV=1
G3X9Q6	Larp4	24	25	27	10	5	7	NA	La-related protein 4 OS=Mus musculus OX=10090 GN=Larp4 PE=1 SV=1
G3UZP7	H2-D1	0	0	0	9	16	7	Oxidation (M)	NA
A0A0R4J098	Zfp326	15	18	9	7	9	0	NA	Zinc finger protein 326 OS=Mus musculus OX=10090 GN=Zfp326 PE=1 SV=1
Q5SWN2	Rpa1	6	6	2	6	0	1	NA	Replication protein A subunit OS=Mus musculus OX=10090 GN=Rpa1 PE=1 SV=2
D3Z4V1	Plrg1	25	16	0	0	7	6	Oxidation (M)	NA
F8WGM5	Stxbp2	0	0	0	12	8	0	NA	NA
E9PXM6	Slc29a1	1	0	0	0	0	0	NA	NA
D3YZ62	Myo5a	0	209	12	2	2	0	NA	Unconventional myosin-Va OS=Mus musculus OX=10090 GN=Myo5a PE=1 SV=1
D3Z4J3	Myo5a	205	209	12	2	2	0	NA	Unconventional myosin-Va OS=Mus musculus OX=10090 GN=Myo5a PE=1 SV=1
A0A338P6G6	Hmga1	3	0	0	6	7	0	NA	NA
A0A384DV79	Hmga1	3	0	0	6	7	0	NA	NA
A0A0R4J1Q0	Edc4	2	1	0	2	1	0	NA	NA
G5E896	Edc4	0	0	0	2	1	0	NA	NA
A0A1Y7VMH3	Vrk1	5	0	1	0	0	0	NA	Serine/threonine-protein kinase VRK1 OS=Mus musculus OX=10090 GN=Vrk1 PE=1 SV=1
A6ZI44	Aldoa	9	4	24	6	7	18	Oxidation (M)	Fructose-bisphosphate aldolase OS=Mus musculus OX=10090 GN=Aldoa PE=1 SV=1
A0A0A0MQD4	9530068E07Rik	3	5	1	11	12	8	Oxidation (M)	RIKEN cDNA 9530068E07 gene OS=Mus musculus OX=10090 GN=9530068E07Rik PE=1 SV=1
A0A0A0MQK3	Srebf1	0	0	0	5	6	7	NA	NA
F6XZS9	Srebf1	0	0	0	5	6	7	NA	NA
Q3TLP8	Rac1	6	3	0	12	14	2	NA	NA
A0A1D5RLL3	Efr3a	0	0	0	5	9	9	Carbamidomethylation	NA
Q3TGU7	Pa2g4	0	4	0	11	3	0	NA	NA
Q9D5H8	Tgfbr1	0	0	0	7	13	19	Carbamidomethylation; Oxidation (M)	NA
E9Q418	Tgfbr1	0	0	0	7	13	19	Carbamidomethylation; Oxidation (M)	NA
Q9CQ43	Dut	9	8	0	9	12	0	NA	NA
A0A1L1SRE8	Ldlr	0	0	0	5	7	5	Carbamidomethylation	NA
A0A1D5RLW5	Rpl18a	18	10	13	11	2	4	Carbamidomethylation	60S ribosomal protein L18a OS=Mus musculus OX=10090 GN=Rpl18a PE=1 SV=1
A0A0A0MQM0	Eif5a	10	6	0	3	8	0	NA	NA
A2A839	Epb41	20	19	15	9	9	12	NA	Protein 4.1 OS=Mus musculus OX=10090 GN=Epb41 PE=1 SV=1
A2A838	Epb41	20	19	15	9	9	12	NA	Protein 4.1 (Fragment) OS=Mus musculus OX=10090 GN=Epb41 PE=1 SV=1
A2A842	Epb41	0	0	15	9	9	12	NA	Protein 4.1 OS=Mus musculus OX=10090 GN=Epb41 PE=1 SV=1
A2A841	Epb41	20	19	15	9	9	12	NA	Protein 4.1 OS=Mus musculus OX=10090 GN=Epb41 PE=1 SV=1
Q5SW88	Rab1a	7	8	0	11	10	6	NA	NA
A0A0G2JES3	Rpl9	15	7	6	13	13	4	NA	60S ribosomal protein L9 (Fragment) OS=Mus musculus OX=10090 GN=Rpl9 PE=1 SV=1
Q542V3	Srsf4	11	8	12	8	0	8	NA	Serine/arginine-rich-splicing factor 4 OS=Mus musculus OX=10090 GN=Srsf4 PE=1 SV=1
A0A494B9R5	Wdr4	23	17	19	8	6	0	NA	tRNA (guanine-N(7)-)-methyltransferase non-catalytic subunit WDR4 (Fragment) OS=Mus musculus OX=10090 GN=Wdr4 PE=1 SV=1
D2CKI9	Ulbp1	1	0	0	3	6	5	Carbamidomethylation	NA
Q8HWA3	Ulbp1	1	0	0	3	6	5	Carbamidomethylation	NA
A0A0G2JEP0	Fxr1	0	0	0	3	4	1	NA	NA
D3Z634	Adgrl3	0	0	0	6	3	11	NA	NA
D3Z593	Adgrl3	0	0	0	6	3	11	NA	NA
D3Z3G4	Adgrl3	0	0	0	6	3	11	NA	NA
D3YTW7	Adgrl3	0	0	0	6	3	11	NA	NA
K3W4M8	Adgrl3	0	0	0	6	3	11	NA	NA
D3YVT9	Adgrl3	0	0	0	6	3	11	NA	NA
D3Z4S7	Adgrl3	0	0	0	6	3	11	NA	NA
D3Z5M6	Adgrl3	0	0	0	6	3	11	NA	NA
B0QZN5	Vamp2	0	0	0	11	5	0	NA	NA
Q8BFU4	Rgs19	0	0	1	8	9	9	Carbamidomethylation	GAIP/RGS19 short isoform OS=Mus musculus OX=10090 GN=Rgs19 PE=1 SV=1
B7ZCT1	Rgs19	0	0	1	8	9	9	Carbamidomethylation	Regulator of G-protein-signaling 19 OS=Mus musculus OX=10090 GN=Rgs19 PE=1 SV=1
Q5SQ20	Pes1	8	9	4	6	5	5	Oxidation (M)	Pescadillo homolog OS=Mus musculus OX=10090 GN=Pes1 PE=1 SV=1
Q3UJH4	Rhox5	8	7	6	6	0	10	Carbamidomethylation	Homeobox protein Rhox5 OS=Mus musculus OX=10090 GN=Rhox5 PE=1 SV=1
V9GXJ4	Rhox5	8	7	6	6	0	10	Carbamidomethylation	Homeobox protein Rhox5 (Fragment) OS=Mus musculus OX=10090 GN=Rhox5 PE=1 SV=1
A0A1L1SS10	Keap1	33	25	0	1	3	5	NA	NA
Q8BMS7	Atp2c1	0	0	0	7	10	18	Carbamidomethylation; Oxidation (M)	NA
H3BLI6	Atp2c1	0	0	0	7	10	18	Carbamidomethylation; Oxidation (M)	NA
H3BL44	Atp2c1	0	0	0	7	10	18	Carbamidomethylation; Oxidation (M)	NA
H3BIX7	Atp2c1	0	0	0	7	10	18	Carbamidomethylation; Oxidation (M)	NA
Q3UZR5	Atp2c1	0	0	0	7	10	18	Carbamidomethylation; Oxidation (M)	NA
A0A0U1RP94	Csnk1g1	1	0	0	9	10	12	Carbamidomethylation	NA
B1ATS4	Atp2a3	8	6	2	7	3	12	Carbamidomethylation; Acetylation (Protein N-term)	Calcium-transporting ATPase OS=Mus musculus OX=10090 GN=Atp2a3 PE=1 SV=1
B1ATS5	Atp2a3	8	6	2	7	0	12	Carbamidomethylation; Acetylation (Protein N-term)	Calcium-transporting ATPase OS=Mus musculus OX=10090 GN=Atp2a3 PE=1 SV=1
E9Q559	Atp2a3	8	6	2	7	0	12	Carbamidomethylation; Acetylation (Protein N-term)	Calcium-transporting ATPase OS=Mus musculus OX=10090 GN=Atp2a3 PE=1 SV=1
A0A494BAX5	Nars1	0	7	7	0	4	0	NA	Asparagine--tRNA ligase cytoplasmic (Fragment) OS=Mus musculus OX=10090 GN=Nars PE=1 SV=1
A0A498WGK2	Nars1	14	7	7	0	4	2	NA	Asparagine--tRNA ligase cytoplasmic OS=Mus musculus OX=10090 GN=Nars PE=4 SV=1
V9GXF8	NA	8	4	0	5	0	0	NA	NA
E9Q800	Immt	67	0	0	0	8	0	NA	NA
B1AZS9	Prdx4	0	0	0	0	4	0	NA	NA
G3UYZ1	Igsf8	0	0	0	3	4	5	NA	NA
A0A0R4J117	Igsf8	0	0	0	3	4	5	NA	NA
Q9Z1M2	Irgm2	3	0	0	0	2	5	Oxidation (M)	NA
A0A140LIF8	Irgm2	3	0	0	0	2	5	Oxidation (M)	NA
Q80XR5	U2af2	14	11	6	6	1	0	NA	U2 snRNP auxiliary factor large subunit OS=Mus musculus OX=10090 GN=U2af2 PE=1 SV=1
Q6ZWZ4	Rpl36	23	12	0	8	2	0	NA	NA
A0A0U1RP03	Lat	1	0	0	4	0	4	NA	NA
Q7M739	Tpr	0	1	0	2	0	0	NA	NA
A0A494BA38	Rab1b	0	0	4	0	0	6	NA	Ras-related protein Rab-1B OS=Mus musculus OX=10090 GN=Rab1b PE=1 SV=1
D3YZ57	Fyn	0	0	0	6	8	12	NA	NA
Q3V117	Acly	8	8	14	0	5	5	Carbamidomethylation; Oxidation (M)	ATP-citrate synthase OS=Mus musculus OX=10090 GN=Acly PE=1 SV=1
A0A0G2JGP1	Crlf2	0	0	0	4	2	3	NA	NA
A0A0R4J0F5	Crlf2	0	0	0	4	2	3	NA	NA
Q3U6K9	Psat1	0	1	0	0	0	4	NA	NA
H3BKN0	Nsun2	13	12	7	5	6	2	NA	tRNA (cytosine(34)-C(5))-methyltransferase OS=Mus musculus OX=10090 GN=Nsun2 PE=1 SV=1
A2A7F6	Clcn6	0	0	0	5	5	8	Carbamidomethylation; Oxidation (M)	NA
E9Q741	Clcn6	0	0	0	5	0	0	NA	NA
A0A0R4J170	Smarca4	34	30	2	0	0	0	NA	Transcription activator BRG1 OS=Mus musculus OX=10090 GN=Smarca4 PE=1 SV=1
A0A1B0GT26	Bnip3	0	0	2	6	8	9	NA	BCL2/adenovirus E1B 19 kDa protein-interacting protein 3 OS=Mus musculus OX=10090 GN=Bnip3 PE=1 SV=1
E9Q1T9	Cse1l	0	0	0	6	2	4	NA	NA
E9QAX7	Cse1l	0	0	0	0	2	0	NA	NA
A0A0R4J1N9	Tfam	5	0	1	7	5	2	NA	Transcription factor A mitochondrial OS=Mus musculus OX=10090 GN=Tfam PE=1 SV=1
D3Z7M5	Nop16	10	0	0	0	2	0	NA	NA
Z4YJT3	Larp1	61	51	43	6	5	4	NA	La-related protein 1 OS=Mus musculus OX=10090 GN=Larp1 PE=1 SV=1
Q8BSN6	Vamp4	0	0	0	3	0	0	NA	NA
Q9D8S5	Srsf5	21	17	13	15	5	6	NA	MCG7614 isoform CRA_c OS=Mus musculus OX=10090 GN=Srsf5 PE=1 SV=1
Q9ESU7	Slc1a5	0	0	0	3	0	0	NA	NA
Q6NZD2	Snx1	2	3	0	1	2	1	NA	NA
Q6AXB7	Fmr1	24	24	27	0	4	1	NA	Fragile X mental retardation syndrome 1 homolog OS=Mus musculus OX=10090 GN=Fmr1 PE=1 SV=1
E9QAT0	Fmr1	24	24	27	1	4	1	NA	Synaptic functional regulator FMR1 OS=Mus musculus OX=10090 GN=Fmr1 PE=1 SV=1
Q792Z1	Try10	16	14	14	17	13	15	Oxidation (M)	MCG140784 OS=Mus musculus OX=10090 GN=Try10 PE=1 SV=1
S4R2K0	Pdf	0	0	0	6	6	7	NA	NA
A0A0J9YVG0	Ppm1g	5	5	3	5	3	0	NA	Protein phosphatase 1G OS=Mus musculus OX=10090 GN=Ppm1g PE=1 SV=1
A0A1B0GX25	Hdac6	2	1	0	2	11	0	NA	NA
A2APM2	Cd44	1	1	0	4	2	1	NA	NA
Q3U8S1	Cd44	1	1	1	4	2	1	NA	CD44 antigen OS=Mus musculus OX=10090 GN=Cd44 PE=1 SV=1
A2APM5	Cd44	1	1	0	4	2	1	NA	NA
A2APM3	Cd44	1	1	0	4	2	1	NA	NA
A2APM4	Cd44	1	1	0	4	2	1	NA	NA
E9QKM8	Cd44	1	1	0	4	2	1	NA	NA
Q80X37	Cd44	1	1	0	4	2	1	NA	NA
A2APM1	Cd44	1	1	0	4	2	1	NA	NA
F7AI87	Psmd4	20	24	22	4	3	6	Oxidation (M)	26S proteasome non-ATPase regulatory subunit 4 (Fragment) OS=Mus musculus OX=10090 GN=Psmd4 PE=1 SV=1
Q8R2K3	Ssbp1	0	2	0	6	5	0	NA	NA
E9QNU3	Dgcr2	0	0	0	0	2	3	NA	NA
Q8C2R4	Dgcr2	0	0	0	0	0	3	NA	NA
A0A0R4J1M6	Dgcr2	0	0	0	0	0	3	NA	NA
Q6P5A9	Dgcr2	0	0	0	0	0	3	NA	NA
E9Q548	Gm20518	0	0	0	1	0	3	NA	NA
A0A0G2JE26	Antxr2	0	0	0	0	3	4	NA	NA
J3QP71	Bsg	12	13	7	5	6	4	NA	Basigin (Fragment) OS=Mus musculus OX=10090 GN=Bsg PE=1 SV=1
Q50HX3	Rab14	7	5	5	10	4	8	NA	RAB14 protein variant OS=Mus musculus OX=10090 GN=Rab14 PE=1 SV=1
A2BE93	Set	0	0	0	3	12	16	NA	NA
A0A2R8VI79	Rbfox1	0	0	20	2	2	1	NA	RNA binding protein fox-1 homolog OS=Mus musculus OX=10090 GN=Rbfox1 PE=1 SV=1
A0A2R8VK79	Rbfox1	25	19	20	2	2	1	NA	RNA binding protein fox-1 homolog OS=Mus musculus OX=10090 GN=Rbfox1 PE=1 SV=1
Q3UGB5	Dazap1	9	5	13	0	5	5	Carbamidomethylation; Acetylation (Protein N-term)	DAZ associated protein 1 isoform CRA_b OS=Mus musculus OX=10090 GN=Dazap1 PE=1 SV=1
A0A0R4J0K4	Tm7sf3	0	0	0	4	3	15	Carbamidomethylation	NA
A2AJ26	Abca2	0	0	0	6	5	27	Carbamidomethylation; Oxidation (M)	NA
E9Q3V6	Septin2	0	2	5	6	10	2	NA	Septin-2 OS=Mus musculus OX=10090 GN=Sept2 PE=1 SV=1
A0A0J9YUS5	Eif4g1	0	15	2	4	0	0	NA	Eukaryotic translation initiation factor 4 gamma 1 OS=Mus musculus OX=10090 GN=Eif4g1 PE=1 SV=1
E9PVC6	Eif4g1	19	15	2	4	0	0	NA	Eukaryotic translation initiation factor 4 gamma 1 OS=Mus musculus OX=10090 GN=Eif4g1 PE=1 SV=1
E9Q9E1	Eif4g1	19	15	2	4	0	0	NA	Eukaryotic translation initiation factor 4 gamma 1 OS=Mus musculus OX=10090 GN=Eif4g1 PE=1 SV=1
E9PVC5	Eif4g1	19	15	2	4	0	0	NA	Eukaryotic translation initiation factor 4 gamma 1 OS=Mus musculus OX=10090 GN=Eif4g1 PE=1 SV=1
Q8JZN2	Csde1	15	11	0	10	4	5	Carbamidomethylation	NA
A0A0G2JF72	Csde1	0	0	0	0	4	0	NA	NA
A2AVJ7	Rrbp1	14	15	3	3	2	1	NA	Ribosome-binding protein 1 OS=Mus musculus OX=10090 GN=Rrbp1 PE=1 SV=1
A0A2I3BRC5	Adcy6	0	0	0	2	5	0	NA	NA
F8VQ52	Adcy6	0	0	0	2	5	5	NA	NA
G3UX26	Vdac2	9	12	2	9	4	8	NA	Voltage-dependent anion-selective channel protein 2 OS=Mus musculus OX=10090 GN=Vdac2 PE=1 SV=1
G3UXX3	Spr	0	0	5	0	3	8	Oxidation (M)	Sepiapterin reductase OS=Mus musculus OX=10090 GN=Spr PE=1 SV=1
Q91XH5	Spr	2	0	5	0	3	8	Oxidation (M)	Sepiapterin reductase OS=Mus musculus OX=10090 GN=Spr PE=1 SV=1
D3Z7Q8	Polr1c	0	0	0	0	0	2	NA	NA
A0A087WRM2	Itm2c	0	0	0	7	0	1	NA	NA
A2A6U3	Septin9	4	5	7	6	11	7	NA	Septin-9 OS=Mus musculus OX=10090 GN=Sept9 PE=1 SV=1
F8WHM0	Cd48	0	0	0	0	6	3	NA	NA
A0A286YEB7	Rps24	0	0	7	11	5	0	NA	40S ribosomal protein S24 OS=Mus musculus OX=10090 GN=Rps24 PE=1 SV=1
A0A0G2JFV9	Exosc9	3	0	0	2	4	0	NA	NA
F6YRW4	Kdm2a	0	0	0	2	0	0	NA	NA
A0A0D9SEG8	Adgre5	0	0	0	0	3	4	NA	NA
E9QMJ5	Adgre5	0	0	0	0	3	4	NA	NA
E9QJS7	Adgre5	0	0	0	0	3	4	NA	NA
Q9DC42	Adgre5	0	0	0	0	3	4	NA	NA
Q6ZWQ5	Snx12	0	0	0	5	6	0	NA	NA
Q3TGS7	Snx12	0	0	0	5	6	0	NA	NA
Q3V2H3	Snx12	0	0	0	5	6	0	NA	NA
G5E902	Slc25a3	10	10	6	11	5	0	NA	MCG10343 isoform CRA_b OS=Mus musculus OX=10090 GN=Slc25a3 PE=1 SV=1
A0A0R4J187	Xrcc6	8	4	1	3	4	0	NA	X-ray repair cross-complementing protein 6 OS=Mus musculus OX=10090 GN=Xrcc6 PE=1 SV=1
A0A2R8VHZ9	Xrcc6	0	0	0	3	4	0	NA	NA
A8XU21	Ncf4	0	0	0	0	0	0	NA	NA
E9PZ69	Tm9sf2	2	0	0	4	6	0	NA	NA
E9QKR0	Gnb2	3	0	0	7	0	13	Carbamidomethylation; Oxidation (M)	NA
E9Q1Y3	Apob	1	0	0	2	3	1	NA	NA
Q3UPZ0	Sema5a	0	0	0	0	3	0	NA	NA
E9PW39	Mov10	22	20	16	0	0	1	NA	Putative helicase MOV-10 OS=Mus musculus OX=10090 GN=Mov10 PE=1 SV=1
D3YVL0	Mov10	22	20	16	0	0	1	NA	Putative helicase MOV-10 OS=Mus musculus OX=10090 GN=Mov10 PE=1 SV=2
D3Z3E8	Mov10	22	20	16	0	0	1	NA	Putative helicase MOV-10 OS=Mus musculus OX=10090 GN=Mov10 PE=1 SV=1
Q91VE4	Ptger4	0	0	0	3	4	7	Oxidation (M)	NA
Q9CY46	Lsm4	8	8	0	3	5	0	NA	NA
D3YTP8	Lsm4	8	8	0	3	5	0	NA	NA
Q5SVX2	Ddx56	0	0	0	2	2	1	NA	NA
Q8C4F9	Rnf13	0	0	0	4	4	0	NA	NA
Q8CB78	Rnf13	0	0	0	4	0	0	NA	NA
Q3UDS7	Adpgk	0	0	0	0	3	0	NA	NA
A0A1L1SSF2	Adpgk	0	0	0	0	3	0	NA	NA
A0A494B9D7	Naa40	2	3	4	6	5	4	Carbamidomethylation	N-alpha-acetyltransferase 40 OS=Mus musculus OX=10090 GN=Naa40 PE=1 SV=1
F6TFN2	Lmo7	31	32	25	0	0	0	NA	LIM domain only 7 (Fragment) OS=Mus musculus OX=10090 GN=Lmo7 PE=1 SV=1
Q3TA68	Wdr36	3	1	2	3	7	2	NA	WD repeat domain 36 OS=Mus musculus OX=10090 GN=Wdr36 PE=1 SV=1
Q3TAQ9	Wdr36	3	1	2	3	7	2	NA	WD repeat domain 36 OS=Mus musculus OX=10090 GN=Wdr36 PE=1 SV=1
A0A0N4SVQ1	Ndufa4	4	2	0	3	1	0	NA	NA
E9PW43	NA	1	2	0	3	2	0	NA	NA
G3X9V0	Psme2	0	0	0	3	2	0	NA	NA
S4R1W5	Rbm6	73	55	55	7	5	4	NA	RNA-binding motif protein 6 OS=Mus musculus OX=10090 GN=Rbm6 PE=1 SV=1
F8WH95	Laptm5	0	0	0	0	0	0	NA	NA
F6QKD2	Ddx47	4	3	1	0	2	0	NA	Probable ATP-dependent RNA helicase DDX47 (Fragment) OS=Mus musculus OX=10090 GN=Ddx47 PE=1 SV=1
A0A0N4SVT1	Ddx47	4	3	1	0	2	0	NA	Probable ATP-dependent RNA helicase DDX47 (Fragment) OS=Mus musculus OX=10090 GN=Ddx47 PE=1 SV=1
A2A464	Slc9a8	0	0	0	2	4	1	NA	NA
Q3TPJ8	Dync1i2	8	0	6	0	0	0	NA	Cytoplasmic dynein 1 intermediate chain 2 OS=Mus musculus OX=10090 GN=Dync1i2 PE=1 SV=1
A2BFF9	Dync1i2	8	0	6	0	0	0	NA	Cytoplasmic dynein 1 intermediate chain 2 OS=Mus musculus OX=10090 GN=Dync1i2 PE=1 SV=1
E9QLR3	Laptm4a	0	0	0	10	12	1	NA	NA
A0A1L1SRJ4	Tspan3	0	0	0	3	0	5	NA	NA
A0A0G2JER9	Dnajb6	2	0	0	0	0	5	NA	NA
G3X8S5	Dnajb6	2	0	0	0	3	0	NA	NA
G8JL74	Ptbp3	5	5	7	6	4	3	Oxidation (M)	Polypyrimidine tract-binding protein 3 OS=Mus musculus OX=10090 GN=Ptbp3 PE=1 SV=1
G3UXA6	Ptbp3	5	5	7	6	4	3	Oxidation (M)	Polypyrimidine tract-binding protein 3 OS=Mus musculus OX=10090 GN=Ptbp3 PE=1 SV=1
A2AMY5	Ubap2	0	7	6	3	0	0	NA	Ubiquitin-associated protein 2 OS=Mus musculus OX=10090 GN=Ubap2 PE=1 SV=1
A0A0J9YTY0	Septin11	0	0	0	0	7	4	NA	NA
A0A0J9YUL3	Septin11	0	0	0	0	7	4	NA	NA
A2A815	Park7	0	0	3	1	2	0	NA	Protein/nucleic acid deglycase DJ-1 (Fragment) OS=Mus musculus OX=10090 GN=Park7 PE=1 SV=8
A2A813	Park7	2	0	3	1	2	0	NA	Protein/nucleic acid deglycase DJ-1 OS=Mus musculus OX=10090 GN=Park7 PE=1 SV=1
A0A338P6P6	Acap2	23	22	14	1	3	4	NA	Arf-GAP with coiled-coil ANK repeat and PH domain-containing protein 2 OS=Mus musculus OX=10090 GN=Acap2 PE=1 SV=1
Q5JC28	Eps15	6	3	1	1	0	0	NA	Epidermal growth factor receptor pathway substrate 15 isoform B OS=Mus musculus OX=10090 GN=Eps15 PE=1 SV=1
H3BK65	Eps15	6	3	1	1	0	0	NA	Epidermal growth factor receptor substrate 15 OS=Mus musculus OX=10090 GN=Eps15 PE=1 SV=1
A0A0G2JEA9	Rbm8a	0	1	0	0	0	0	NA	NA
Q80X98	Dhx38	27	21	4	2	2	4	NA	DEAH (Asp-Glu-Ala-His) box polypeptide 38 OS=Mus musculus OX=10090 GN=Dhx38 PE=1 SV=1
A2AE27	Ampd2	0	1	4	5	0	0	NA	AMP deaminase OS=Mus musculus OX=10090 GN=Ampd2 PE=1 SV=1
A8DIL0	Lgals8	0	0	0	3	5	7	Carbamidomethylation	NA
A0A140LJ59	Eif3k	0	0	0	2	2	0	NA	NA
A0A1Y7VIT3	Rasef	0	0	0	0	0	0	NA	NA
E9Q4Q2	Sf1	0	0	13	4	6	3	Acetylation (Protein N-term)	Splicing factor 1 OS=Mus musculus OX=10090 GN=Sf1 PE=1 SV=1
D3YZC9	Sf1	16	12	13	4	6	3	Acetylation (Protein N-term)	Splicing factor 1 OS=Mus musculus OX=10090 GN=Sf1 PE=1 SV=1
D3YZD0	Sf1	0	0	13	4	6	3	Acetylation (Protein N-term)	Splicing factor 1 OS=Mus musculus OX=10090 GN=Sf1 PE=1 SV=1
D3YVH4	Sf1	0	0	0	0	0	0	NA	NA
E9Q6U4	Pfdn4	0	0	0	0	0	0	NA	NA
Q3UWL8	Pfdn4	0	0	0	0	0	0	NA	NA
Q31093	H2-M3	0	0	0	4	1	1	NA	NA
Q6NV52	Tacc3	3	0	2	0	0	0	NA	Transforming acidic coiled-coil-containing protein 3 OS=Mus musculus OX=10090 GN=Tacc3 PE=1 SV=1
Q99LH8	Tacc3	3	1	0	2	0	0	NA	NA
A0A2R8VHK1	Cyc1	0	5	0	8	3	0	NA	NA
D3YZ09	Gar1	24	21	13	3	4	4	NA	H/ACA ribonucleoprotein complex subunit (Fragment) OS=Mus musculus OX=10090 GN=Gar1 PE=1 SV=1
H3BJ30	Cpsf6	5	5	6	2	0	3	NA	Cleavage and polyadenylation-specificity factor subunit 6 OS=Mus musculus OX=10090 GN=Cpsf6 PE=1 SV=1
H3BJW3	Cpsf6	5	5	6	2	0	3	NA	Cleavage and polyadenylation-specificity factor subunit 6 OS=Mus musculus OX=10090 GN=Cpsf6 PE=1 SV=1
Q3UBW1	Spryd7	0	0	0	0	0	0	NA	NA
A0A0A6YVU8	Adrm1b	10	11	0	5	0	0	NA	NA
Q8CIH9	Ppat	4	2	11	0	4	13	NA	Amidophosphoribosyltransferase OS=Mus musculus OX=10090 GN=Ppat PE=1 SV=1
A0A0R4J247	Sla	0	0	4	2	6	6	Carbamidomethylation	Src-like adaptor isoform CRA_a OS=Mus musculus OX=10090 GN=Sla PE=1 SV=1
E9Q5B5	Hk2	7	5	0	0	3	0	NA	NA
E9Q8Y1	Dek	0	2	0	0	0	1	NA	NA
D3YVJ6	Dek	0	2	0	0	0	1	NA	NA
A0A0R4J140	Cluh	7	5	5	3	2	1	NA	Clustered mitochondria protein homolog OS=Mus musculus OX=10090 GN=Cluh PE=1 SV=1
E0CYQ2	Nudcd2	0	4	0	2	2	0	NA	NA
A2AT02	Nsfl1c	0	0	0	0	0	3	NA	NA
D3YWF6	Otub1	4	0	6	0	0	3	NA	Ubiquitin thioesterase OTUB1 OS=Mus musculus OX=10090 GN=Otub1 PE=1 SV=1
Q3UZG4	Aimp1	15	11	14	3	0	0	NA	Aminoacyl tRNA synthase complex-interacting multifunctional protein 1 OS=Mus musculus OX=10090 GN=Aimp1 PE=1 SV=1
A0A0G2JEA0	Ankib1	0	0	0	0	0	0	NA	NA
F8WIS0	Ccr9	0	0	0	4	6	0	NA	NA
A0A3B2WCL5	Ranbp3	0	0	1	2	3	0	NA	RAN binding protein 3 isoform CRA_i OS=Mus musculus OX=10090 GN=Ranbp3 PE=1 SV=1
F8WJ30	Pfdn2	0	0	0	1	1	0	NA	NA
Q3UNN4	Smarcc1	23	24	5	0	1	2	Acetylation (Protein N-term)	SWI/SNF complex subunit SMARCC1 OS=Mus musculus OX=10090 GN=Smarcc1 PE=1 SV=1
A0A494BBJ8	Fermt3	1	0	1	1	0	0	NA	Fermitin family homolog 3 OS=Mus musculus OX=10090 GN=Fermt3 PE=1 SV=1
A0A494B9W3	Fermt3	1	0	1	1	1	0	NA	Fermitin family homolog 3 OS=Mus musculus OX=10090 GN=Fermt3 PE=1 SV=1
A0A0U1RPL0	Atxn2l	17	11	7	0	0	0	NA	Ataxin-2-like protein OS=Mus musculus OX=10090 GN=Atxn2l PE=1 SV=1
Q3TGG2	Atxn2l	0	11	8	0	1	1	NA	Ataxin-2-like protein OS=Mus musculus OX=10090 GN=Atxn2l PE=1 SV=1
E9Q5Q0	Atxn2l	0	0	0	0	0	0	NA	NA
B2RRI5	Lrig2	0	0	0	2	1	0	NA	NA
E9Q9F5	Septin7	0	1	5	3	10	4	NA	Septin-7 OS=Mus musculus OX=10090 GN=Sept7 PE=1 SV=2
E9Q1G8	Septin7	0	1	5	3	10	4	NA	Septin-7 OS=Mus musculus OX=10090 GN=Sept7 PE=1 SV=2
G3X920	Armc8	16	12	15	0	0	0	NA	Armadillo repeat containing 8 isoform CRA_b OS=Mus musculus OX=10090 GN=Armc8 PE=1 SV=1
D3Z0M9	Ddx23	17	14	7	3	3	1	NA	DEAD (Asp-Glu-Ala-Asp) box polypeptide 23 OS=Mus musculus OX=10090 GN=Ddx23 PE=1 SV=1
B2RPU8	Zbed5	1	0	0	2	3	0	NA	NA
Q8BVQ0	Skic8	0	0	0	0	0	0	NA	NA
A2AS05	Helz2	3	0	0	3	6	0	NA	NA
A2AS03	Helz2	3	0	0	3	6	2	Carbamidomethylation	NA
A2A5R8	Stau1	0	0	3	0	0	0	NA	Double-stranded RNA-binding protein Staufen homolog 1 OS=Mus musculus OX=10090 GN=Stau1 PE=1 SV=1
Q9DBE7	Stau1	0	0	3	0	3	0	NA	Double-stranded RNA-binding protein Staufen homolog 1 OS=Mus musculus OX=10090 GN=Stau1 PE=1 SV=1
A2A5S3	Stau1	6	3	3	0	0	0	NA	Double-stranded RNA-binding protein Staufen homolog 1 OS=Mus musculus OX=10090 GN=Stau1 PE=1 SV=1
Q8VHM7	Il10rb	0	0	0	0	0	4	NA	NA
G3UXI2	Tmem127	0	0	0	5	4	4	Acetylation (Protein N-term); Oxidation (M)	NA
Q8MHR8	Klra1	0	0	0	1	3	2	Acetylation (Protein N-term)	NA
F6TVX7	NA	2	2	2	0	0	2	NA	Predicted gene 20671 (Fragment) OS=Mus musculus OX=10090 GN=Gm20671 PE=3 SV=1
F7C386	Pisd	2	2	2	0	0	2	NA	Phosphatidylserine decarboxylase proenzyme mitochondrial (Fragment) OS=Mus musculus OX=10090 GN=Pisd PE=4 SV=1
E9PX91	Pisd	2	0	2	0	0	2	NA	Phosphatidylserine decarboxylase proenzyme mitochondrial OS=Mus musculus OX=10090 GN=Pisd PE=3 SV=1
E9PUY1	Mrps12	3	3	0	1	2	0	NA	NA
Q9D4G5	Pop1	10	12	14	0	0	1	NA	Processing of precursor 1 ribonuclease P/MRP family (S. cerevisiae) OS=Mus musculus OX=10090 GN=Pop1 PE=1 SV=1
Q8K205	Pop1	0	12	14	0	0	1	NA	Processing of 1 ribonuclease P/MRP family (S. cerevisiae) OS=Mus musculus OX=10090 GN=Pop1 PE=1 SV=1
D6RHN2	Selenbp1	0	0	0	0	0	0	NA	NA
A0A0R4J135	Selenbp2	0	0	0	0	0	0	NA	NA
G3UWK0	Selenbp2	0	0	0	0	0	0	NA	NA
A0A494BB49	Cd5	0	0	0	0	2	5	Carbamidomethylation	NA
A0A1D5RML8	Polr2c	1	0	3	0	0	1	NA	DNA-directed RNA polymerase II subunit RPB3 OS=Mus musculus OX=10090 GN=Polr2c PE=1 SV=1
A0A1D5RLM9	Polr2c	0	0	0	0	0	0	NA	NA
A0A338P7E5	Ube2l3	0	0	0	0	2	0	NA	NA
A0A0R4J0N5	Pdcd2	5	0	0	4	4	2	NA	NA
Q6PD20	Mccc2	0	0	0	0	2	0	NA	NA
A0A0M3HEP7	Atp8a1	0	0	0	4	0	5	NA	NA
G5E852	Jak2	0	0	0	0	0	4	NA	NA
F7AAP4	Atp2b4	0	0	0	0	0	4	NA	NA
E9Q828	Atp2b4	0	0	0	0	0	4	NA	NA
Q8C048	Atp2b3	0	0	0	0	0	0	NA	NA
A2ALL9	Atp2b3	0	0	0	0	0	0	NA	NA
Q0VF55	Atp2b3	0	0	0	0	0	0	NA	NA
Q91Z78	Bnip3l	0	0	0	2	3	4	NA	NA
F6QYF8	Npepps	8	0	0	4	2	0	NA	NA
A2AV19	Exosc2	8	6	8	0	1	0	NA	Exosome complex component RRP4 (Fragment) OS=Mus musculus OX=10090 GN=Exosc2 PE=1 SV=1
H7BWX5	Abtb3	0	2	0	2	2	0	NA	NA
A0A0R4J1J1	Pnkd	2	0	0	0	0	0	NA	NA
Q9D1M1	Polr1d	3	1	0	1	0	0	NA	NA
A0A0J9YUH6	Polr1d	0	0	0	0	0	0	NA	NA
A0A0J9YV27	Polr1d	0	0	0	0	0	0	NA	NA
A0A0N4SVL9	Ppp6c	0	0	5	3	0	0	NA	Serine/threonine-protein phosphatase OS=Mus musculus OX=10090 GN=Ppp6c PE=1 SV=1
D3Z5W0	Atp6ap1l	0	0	0	1	1	0	NA	NA
E0CX52	Clec2i	0	0	0	1	0	0	NA	NA
B7FAV1	Flna	24	0	6	1	1	5	NA	Filamin alpha (Fragment) OS=Mus musculus OX=10090 GN=Flna PE=1 SV=1
B7FAU9	Flna	24	27	6	1	1	5	NA	Filamin alpha OS=Mus musculus OX=10090 GN=Flna PE=1 SV=1
Q05BZ0	Golph3	12	5	0	9	3	0	NA	NA
A0A0G2JGL0	Ube2d3	1	0	0	4	0	0	NA	NA
G3UYU4	Flot1	0	0	0	0	2	12	Carbamidomethylation	NA
G3UY29	Rab11b	1	1	2	1	1	7	Acetylation (Protein N-term)	MCG22989 isoform CRA_a OS=Mus musculus OX=10090 GN=Rab11b PE=4 SV=1
E9Q3P9	Rab11a	1	1	2	1	1	7	Acetylation (Protein N-term)	Ras-related protein Rab-11A OS=Mus musculus OX=10090 GN=Rab11a PE=4 SV=1
F8WGS1	Rab11a	1	1	2	1	1	7	Acetylation (Protein N-term)	Ras-related protein Rab-11A (Fragment) OS=Mus musculus OX=10090 GN=Rab11a PE=4 SV=1
J3QN19	Prim1	0	0	0	0	0	0	NA	NA
Q8C3J2	St6galnac4	0	0	0	1	1	0	NA	NA
Q9D881	Cox5b-ps	0	8	0	1	0	0	NA	NA
E9PYK0	Unc93b1	0	0	0	0	0	2	Carbamidomethylation	NA
Q3UEW6	Flt3	0	1	0	2	3	7	Carbamidomethylation	NA
A0A087WQH8	Slc35a4	0	0	0	6	2	0	NA	NA
A0A0G2JDL9	Rap1a	2	0	0	5	1	0	NA	NA
A0A0G2JE52	Rap1a	0	0	0	0	1	0	NA	NA
A0A3Q4EH93	Nubp2	0	0	0	0	1	0	NA	NA
A0A3Q4L2S1	Nubp2	0	0	0	0	1	0	NA	NA
Q5RL20	Mrpl43	2	0	0	0	1	0	NA	NA
E9Q9A5	Pnkp	0	0	0	3	0	0	NA	NA
G5E8N7	Pnkp	0	0	0	3	0	0	NA	NA
D3Z1V4	Pebp1	0	0	0	0	0	2	NA	NA
D6RHS6	Pebp1	2	0	0	0	0	2	NA	NA
A0A0U1RNX8	Bcl7c	2	0	0	0	0	0	NA	NA
Q8C0M5	Susd6	0	0	0	2	2	2	NA	NA
Z4YJH1	Cetn2	0	1	0	0	0	0	NA	NA
E0CY84	Arrdc3	0	0	0	0	0	1	NA	NA
G3X8T2	Zc3h18	13	13	15	1	0	2	NA	RIKEN cDNA 5830416A07 isoform CRA_c OS=Mus musculus OX=10090 GN=Zc3h18 PE=1 SV=1
H3BIW0	Zc3h18	0	0	15	1	0	2	NA	Zinc finger CCCH domain-containing protein 18 OS=Mus musculus OX=10090 GN=Zc3h18 PE=1 SV=1
Q3TF45	Clcn3	0	0	0	3	0	3	Acetylation (Protein N-term); Oxidation (M)	NA
A0A1L1STE6	Idh3a	2	4	0	2	2	1	NA	NA
K4DI65	Cirbp	3	0	0	0	0	0	NA	NA
D3YU80	Cirbp	3	0	0	0	0	0	NA	NA
A0A2R8VHH1	Nup155	7	7	2	3	3	0	NA	Nuclear pore complex protein Nup155 OS=Mus musculus OX=10090 GN=Nup155 PE=1 SV=1
Q3UC82	Lig3	4	2	2	0	0	0	NA	DNA ligase OS=Mus musculus OX=10090 GN=Lig3 PE=1 SV=1
Q80ZH7	Lig3	4	2	2	0	0	0	NA	DNA ligase OS=Mus musculus OX=10090 GN=Lig3 PE=1 SV=1
K4DI59	Lig3	4	2	2	0	0	0	NA	DNA ligase OS=Mus musculus OX=10090 GN=Lig3 PE=1 SV=1
F8VQC1	Srp72	0	3	1	0	1	0	NA	Signal recognition particle subunit SRP72 OS=Mus musculus OX=10090 GN=Srp72 PE=1 SV=1
A0A0R4J0K1	Selenof	9	6	0	0	1	0	NA	NA
A0A0R4J0P6	Parn	1	0	0	0	0	0	NA	NA
Q3U422	Ndufv3	0	1	0	0	0	0	NA	NA
E9QM77	Atxn2	11	6	8	1	1	1	NA	Ataxin-2 OS=Mus musculus OX=10090 GN=Atxn2 PE=1 SV=1
D3YX34	Dctn1	9	11	2	0	0	0	NA	Dynactin subunit 1 OS=Mus musculus OX=10090 GN=Dctn1 PE=1 SV=1
E9Q586	Dctn1	9	11	2	2	1	0	NA	Dynactin subunit 1 OS=Mus musculus OX=10090 GN=Dctn1 PE=1 SV=1
E9Q3M3	Dctn1	9	11	2	2	1	0	NA	Dynactin subunit 1 OS=Mus musculus OX=10090 GN=Dctn1 PE=1 SV=1
A0A1L1SRC3	Rbm7	0	2	1	0	0	0	NA	RNA-binding protein 7 OS=Mus musculus OX=10090 GN=Rbm7 PE=1 SV=1
A0A338P6E7	Nrros	0	0	0	2	0	0	NA	NA
S4R1S2	Ank3	0	0	0	2	0	0	NA	NA
S4R2S8	Ank3	0	0	0	2	0	0	NA	NA
A0A1W2P812	Ank3	0	0	0	2	0	0	NA	NA
G5E8K2	Ank3	0	0	0	2	0	0	NA	NA
G5E8K3	Ank3	0	0	0	2	0	0	NA	NA
S4R2K9	Ank3	0	0	0	2	0	0	NA	NA
Q3UVY0	Ank3	0	0	0	0	0	0	NA	NA
S4R229	Ank3	0	0	0	0	0	0	NA	NA
W4VSQ0	Ank3	0	0	0	0	0	0	NA	NA
F6TQL3	Dnajc8	0	0	0	0	0	0	NA	NA
A2ALF0	Dnajc8	0	6	1	0	8	2	NA	DnaJ homolog subfamily C member 8 OS=Mus musculus OX=10090 GN=Dnajc8 PE=1 SV=1
A2ALF3	Dnajc8	0	6	1	10	8	2	NA	DnaJ homolog subfamily C member 8 OS=Mus musculus OX=10090 GN=Dnajc8 PE=1 SV=1
Q3TKD0	Tnpo1	0	0	0	0	1	3	NA	NA
A1L3S7	Gatad2b	8	5	1	0	0	1	NA	Gatad2b protein OS=Mus musculus OX=10090 GN=Gatad2b PE=1 SV=1
Q9D9P1	Chchd3	0	0	0	0	3	2	NA	NA
A0A0A6YX02	Lamtor1	0	0	0	0	1	0	NA	NA
Q9CPS5	Psmd8	10	7	9	3	5	4	NA	26S proteasome non-ATPase regulatory subunit 8 OS=Mus musculus OX=10090 GN=Psmd8 PE=1 SV=2
F6V084	Tmx1	0	0	0	1	1	0	NA	NA
A0A0R4J0U2	Ppp4r2	8	5	7	0	0	0	NA	Serine/threonine-protein phosphatase 4 regulatory subunit 2 OS=Mus musculus OX=10090 GN=Ppp4r2 PE=1 SV=1
D3Z7P2	Tmem109	0	0	0	2	0	0	NA	NA
D3Z3Z2	Tmem109	0	0	0	2	0	0	NA	NA
D3YX08	Tmem109	0	0	0	2	0	0	NA	NA
D3Z0I8	Tmem109	0	0	0	2	0	0	NA	NA
G3UYG5	Kcnq5	0	0	0	1	0	6	NA	NA
G3UYP4	Kcnq5	0	0	0	1	0	6	NA	NA
E9Q9F1	Kcnq5	0	0	0	1	0	6	NA	NA
G3UZ84	Kcnq5	0	0	0	1	0	0	NA	NA
A0A0N5E9G7	Rfc1	7	6	9	2	1	2	Carbamidomethylation	Replication factor C subunit 1 OS=Mus musculus OX=10090 GN=Rfc1 PE=1 SV=1
G3X8Z6	Rfc1	7	6	9	2	1	2	Carbamidomethylation	Replication factor C subunit 1 OS=Mus musculus OX=10090 GN=Rfc1 PE=1 SV=1
Q5U4B1	Rfc1	7	6	9	2	0	2	Carbamidomethylation	Replication factor C subunit 1 OS=Mus musculus OX=10090 GN=Rfc1 PE=1 SV=1
G3UWX1	Rfc1	7	6	9	2	1	2	Carbamidomethylation	Replication factor C subunit 1 OS=Mus musculus OX=10090 GN=Rfc1 PE=1 SV=2
Q5SU72	Trim25	0	3	3	1	0	0	NA	E3 ubiquitin/ISG15 ligase TRIM25 OS=Mus musculus OX=10090 GN=Trim25 PE=1 SV=1
Q5SU71	Trim25	0	3	3	1	0	0	NA	E3 ubiquitin/ISG15 ligase TRIM25 OS=Mus musculus OX=10090 GN=Trim25 PE=1 SV=1
B1AV14	Apool	0	0	0	0	0	0	NA	NA
Q9CZM3	Tmem33	0	0	0	1	1	0	NA	NA
A0A0R4J1Z3	Tmem33	3	0	0	1	1	0	NA	NA
Q8BTY5	Psmb5	0	0	0	0	0	0	NA	NA
E9PYD5	Tcea1	0	1	4	3	0	3	Carbamidomethylation	Transcription elongation factor A protein 1 OS=Mus musculus OX=10090 GN=Tcea1 PE=1 SV=1
B0R1E3	Hint1	0	0	0	0	0	0	NA	NA
A0A0A0MQF5	Otud6b	0	0	1	1	0	1	NA	Deubiquitinase OTUD6B OS=Mus musculus OX=10090 GN=Otud6b PE=1 SV=1
D3YV67	Tmem165	0	1	0	0	1	0	NA	NA
A0A0R4J0V5	Polr2a	6	11	1	0	0	0	NA	DNA-directed RNA polymerase subunit OS=Mus musculus OX=10090 GN=Polr2a PE=1 SV=1
F6VYQ6	Exosc10	8	0	0	0	0	0	NA	NA
Q8K366	Exosc10	8	7	8	0	0	0	NA	Exosc10 protein OS=Mus musculus OX=10090 GN=Exosc10 PE=1 SV=1
E9Q1S3	Sec23a	0	0	0	0	2	0	NA	NA
A0A0G2JGQ4	Nub1	0	0	1	0	0	0	NA	NEDD8 ultimate buster 1 OS=Mus musculus OX=10090 GN=Nub1 PE=1 SV=1
E9PYI8	Usp14	3	2	1	4	0	0	NA	Ubiquitin carboxyl-terminal hydrolase OS=Mus musculus OX=10090 GN=Usp14 PE=1 SV=1
E9Q481	Ppp4r3a	5	5	5	0	0	0	NA	Serine/threonine-protein phosphatase 4 regulatory subunit 3A OS=Mus musculus OX=10090 GN=Ppp4r3a PE=1 SV=1
B0QZH9	Phf23	0	0	0	0	0	0	NA	NA
Q8VHA8	Ss18	1	1	2	0	0	0	NA	Protein SSXT OS=Mus musculus OX=10090 GN=Ss18 PE=1 SV=1
Q8BKL1	Ss18	1	1	2	0	0	0	NA	Protein SSXT OS=Mus musculus OX=10090 GN=Ss18 PE=1 SV=1
Q8BJJ6	Ss18	1	1	2	0	0	0	NA	Protein SSXT OS=Mus musculus OX=10090 GN=Ss18 PE=1 SV=1
F6RPJ9	Ide	1	0	0	0	1	4	NA	NA
A0A498WFS2	Ubxn1	0	0	7	0	0	5	NA	UBX domain-containing protein 1 OS=Mus musculus OX=10090 GN=Ubxn1 PE=4 SV=1
G5E8V8	Phax	8	8	13	0	1	0	NA	Phosphorylated adapter RNA export protein OS=Mus musculus OX=10090 GN=Phax PE=1 SV=1
D3YVV1	Tmem30a	0	0	0	0	3	0	NA	NA
A2ABZ2	Pycr1	0	0	0	0	1	0	NA	NA
A0A494BBD8	Anxa1	8	2	12	0	2	7	NA	Annexin OS=Mus musculus OX=10090 GN=Anxa1 PE=1 SV=1
E0CX99	Nwd1	0	0	0	1	0	4	NA	NA
A0A2I3BR96	Nwd1	0	0	0	1	0	4	NA	NA
A0A0R4J293	Tgm1	1	1	0	1	1	7	NA	NA
A0A286YD19	Selenok	0	0	0	0	0	0	NA	NA
D3Z0S0	Cops7a	0	2	0	0	0	0	NA	NA
D3YVI6	Cops7a	0	2	0	0	0	0	NA	NA
D3Z440	Cops7a	0	2	0	0	0	0	NA	NA
Q8CFZ0	Ube2i	2	2	0	0	3	0	NA	NA
G3UYP0	Ube2i	2	2	0	0	3	0	NA	NA
A0A0R4J0B4	Cmas	0	2	0	0	0	0	NA	NA
E9Q9E8	Cd84	0	0	0	2	2	0	NA	NA
A0A0R4J0K5	Cd84	0	0	0	2	2	4	NA	NA
D3YTQ9	Rps15	19	13	0	2	0	0	NA	NA
A0A0N4SUH4	Pum3	0	0	1	0	0	0	NA	Pumilio homolog 3 OS=Mus musculus OX=10090 GN=Pum3 PE=1 SV=1
A0A494BBI7	Pum3	0	0	1	0	0	0	NA	Pumilio homolog 3 (Fragment) OS=Mus musculus OX=10090 GN=Pum3 PE=1 SV=1
A0A494BB98	Pum3	0	1	0	0	0	0	NA	NA
A0A0R4J1I3	Men1	2	1	0	1	2	0	NA	NA
D3YYT1	Glyr1	15	10	7	1	0	0	NA	Putative oxidoreductase GLYR1 OS=Mus musculus OX=10090 GN=Glyr1 PE=1 SV=1
Q4VBF8	Sipa1l1	0	0	0	0	0	0	NA	NA
Q3UDM0	Mob1b	4	3	0	0	2	1	NA	NA
F2Z3X3	Cuedc1	0	0	0	0	0	0	NA	NA
E9Q242	Adsl	0	0	0	1	1	3	NA	NA
A0A140LHU1	Adsl	0	0	0	1	1	0	NA	NA
E9Q3T7	Adsl	0	0	5	1	1	0	NA	Adenylosuccinate lyase OS=Mus musculus OX=10090 GN=Adsl PE=1 SV=1
A2ALA0	Surf6	1	0	1	0	0	0	NA	Surfeit locus protein 6 OS=Mus musculus OX=10090 GN=Surf6 PE=1 SV=1
G3UXZ5	Psme1	0	0	0	0	0	0	NA	NA
G3UWN9	Psme1	0	0	0	0	0	0	NA	NA
Q3U5V8	Stx11	0	0	0	2	4	4	NA	NA
D3Z0Y2	Prdx6	3	1	1	0	0	3	Carbamidomethylation	Peroxiredoxin-6 OS=Mus musculus OX=10090 GN=Prdx6 PE=1 SV=1
H3BKT5	Ahcyl2	2	2	0	3	2	0	NA	NA
F7DF36	Sidt2	0	0	0	0	0	0	NA	NA
F7DFH5	Sidt2	0	0	0	0	0	0	NA	NA
F6TVH9	Sidt2	0	0	0	0	0	0	NA	NA
F7B6N2	Sidt2	0	0	0	0	0	0	NA	NA
E0CXC7	Sidt2	0	0	0	2	2	0	NA	NA
B1AT82	Prpsap1	0	6	3	1	1	1	NA	MCG6846 isoform CRA_c OS=Mus musculus OX=10090 GN=Prpsap1 PE=1 SV=1
A0A0A6YWX6	Uqcrc1	0	0	0	0	0	0	NA	NA
A2ANR6	Csnk2a1	0	0	0	0	0	0	NA	NA
D3YWT3	Tcf7l2	0	0	0	2	0	0	NA	NA
F6WPX2	Tcf7l2	0	0	0	2	0	0	NA	NA
E9QQ91	Tcf7l2	0	0	0	2	0	0	NA	NA
F6WBK9	Tcf7l2	0	0	0	2	0	0	NA	NA
F6XQR1	Tcf7l2	0	0	0	2	0	1	NA	NA
E9QQ90	Tcf7l2	0	0	0	0	0	0	NA	NA
E9QQ89	Tcf7l2	0	0	0	2	0	0	NA	NA
Q8C402	Lef1	0	0	0	2	0	0	NA	NA
Q8BGZ9	Lef1	0	0	0	2	0	0	NA	NA
E9Q990	Tcf7l2	0	0	0	2	0	0	NA	NA
K3W4L1	Taf6l	0	0	0	0	0	1	NA	NA
H3BK01	Taf6l	0	0	0	0	0	1	NA	NA
A0A1L1STF9	Sltm	0	3	0	1	1	1	Acetylation (Protein N-term)	NA
A2AJI1	Map7d1	2	0	2	0	0	0	NA	MAP7 domain-containing protein 1 OS=Mus musculus OX=10090 GN=Map7d1 PE=1 SV=1
A8Y5P4	Map7d1	2	0	2	0	0	0	NA	MAP7 domain-containing protein 1 OS=Mus musculus OX=10090 GN=Map7d1 PE=1 SV=1
Q3TYW3	Tmem185a	0	0	0	1	1	3	NA	NA
G3UZX6	Sumo3	1	0	0	2	0	0	NA	NA
H7BWX9	Sumo2	1	0	0	2	0	0	NA	NA
D3Z794	Sumo2	1	0	0	2	0	0	NA	NA
G3UZ60	Gm49325	1	0	0	2	0	0	NA	NA
G3UWI9	Sumo3	1	0	0	2	0	0	NA	NA
G3UWX9	Sumo3	1	0	0	2	0	0	NA	NA
G3UZA7	Sumo3	1	0	0	2	0	0	NA	NA
F7APP3	Nmt2	0	0	0	0	1	0	NA	NA
B1ARU1	NA	0	1	0	2	0	0	NA	NA
E9QA63	NA	0	1	2	2	0	0	NA	Microtubule-actin cross-linking factor 1 OS=Mus musculus OX=10090 GN=Macf1 PE=1 SV=2
B1ARU4	Macf1	0	1	2	2	0	0	NA	Microtubule-actin cross-linking factor 1 OS=Mus musculus OX=10090 GN=Macf1 PE=1 SV=1
E9PVY8	Macf1	0	1	2	2	0	0	NA	Microtubule-actin cross-linking factor 1 OS=Mus musculus OX=10090 GN=Macf1 PE=1 SV=2
F6Q750	Macf1	0	1	0	2	0	0	NA	NA
A0A0A0MQA6	Macf1	0	1	2	2	0	0	NA	Microtubule-actin cross-linking factor 1 OS=Mus musculus OX=10090 GN=Macf1 PE=1 SV=1
F7ACR9	Macf1	0	1	2	2	0	0	NA	Microtubule-actin cross-linking factor 1 (Fragment) OS=Mus musculus OX=10090 GN=Macf1 PE=1 SV=1
E9QNP1	NA	0	1	2	2	0	0	NA	Microtubule-actin cross-linking factor 1 OS=Mus musculus OX=10090 GN=Macf1 PE=1 SV=2
A2AIW9	Pmpca	1	0	0	0	1	1	NA	NA
Q9CWU3	Ppp2r2a	0	0	0	2	1	9	Carbamidomethylation; Acetylation (Protein N-term)	NA
B1AUX2	Hcfc1	3	3	0	2	0	0	NA	NA
E9Q2Y9	Desi1	0	0	0	1	1	0	NA	NA
F8WJJ8	Desi1	0	0	0	1	1	0	NA	NA
D6RDE8	Desi1	0	0	0	1	1	0	NA	NA
Q3TCG9	Desi1	0	0	0	1	1	0	NA	NA
G3X8R2	Sra1	0	0	0	0	0	0	NA	NA
E9PXG9	Vps53	0	0	0	0	1	2	NA	NA
E9PYD3	Vps53	0	0	0	0	0	0	NA	NA
E9PWD1	Vps53	0	0	0	0	0	0	NA	NA
A0A0G2JGR0	Hax1	0	0	0	1	0	1	NA	NA
A0A0G2JE46	Hax1	1	1	0	1	0	1	NA	NA
A0A0G2JDP0	Hax1	1	1	0	1	0	1	NA	NA
A2AQJ5	Tmem87a	0	0	0	0	0	0	NA	NA
A2AQJ6	Tmem87a	0	0	0	0	0	1	NA	NA
E9Q317	Sap18b	15	17	0	2	2	0	NA	NA
D3YY73	Sap18	0	0	0	0	0	0	NA	NA
D3Z2N9	Sap18	0	0	0	0	0	0	NA	NA
Q5SV02	Rad50	15	11	11	1	2	0	NA	DNA repair protein RAD50 OS=Mus musculus OX=10090 GN=Rad50 PE=1 SV=1
E9PUJ2	Rad50	0	0	0	1	2	0	NA	NA
Q9Z257	P2rx4	0	0	0	2	0	0	NA	NA
D6RCG2	Alg5	0	0	0	0	0	0	NA	NA
O70619	Tcstv1	0	0	0	0	0	1	NA	NA
J3QMN9	D13Ertd608e	0	0	0	0	0	1	NA	NA
Q3UPR8	D13Ertd608e	0	0	0	0	0	1	NA	NA
O70517	Gm20767	0	0	6	0	0	1	NA	Predicted gene 20767 OS=Mus musculus OX=10090 GN=Gm20767 PE=2 SV=1
O70518	Tcstv3	0	0	0	0	0	1	NA	NA
J3KMS6	Gm21818	0	0	0	0	1	1	NA	NA
O70616	AF067061	10	6	7	0	0	1	NA	AF067061 protein OS=Mus musculus OX=10090 GN=AF067061 PE=2 SV=1
J3QK00	Gm21761	8	0	0	0	0	1	NA	NA
B8JK56	Adcy3	0	0	0	3	2	6	NA	NA
A0A1L1ST25	Exosc7	0	0	0	1	0	0	NA	NA
A0A494BBK3	Pfdn1	1	1	0	1	1	0	NA	NA
A0A494BAH5	Pfdn1	0	1	0	1	1	0	NA	NA
Q9CQF7	Pfdn1	0	1	0	1	1	0	NA	NA
D6RGM1	Rfc4	8	7	0	0	1	3	NA	NA
Q3UI84	Rfc4	8	7	4	3	1	3	NA	Replication factor C subunit 4 OS=Mus musculus OX=10090 GN=Rfc4 PE=1 SV=1
A0A075B5J6	Gm20730	0	2	4	0	11	0	NA	Predicted gene 20730 OS=Mus musculus OX=10090 GN=Gm20730 PE=4 SV=7
A0A1B0GX15	Apoe	0	0	0	0	0	0	NA	NA
G3UWN5	Apoe	0	0	0	0	0	0	NA	NA
Z4YL78	Ckap5	11	16	0	2	0	0	NA	NA
A0A0R4J0K2	Ckap5	11	16	0	2	0	0	NA	NA
K3W4R5	Ckap5	11	16	0	2	0	0	NA	NA
G3UXL2	Prps1l3	7	4	3	0	1	1	NA	Phosphoribosyl pyrophosphate synthetase 1-like 3 OS=Mus musculus OX=10090 GN=Prps1l3 PE=3 SV=1
Q8C5R8	Prps1l1	0	4	0	0	1	0	NA	NA
H6TMF5	Prkacb	0	2	2	0	0	1	NA	cAMP-dependent protein kinase catalytic subunit beta (Fragment) OS=Mus musculus OX=10090 GN=Prkacb PE=1 SV=1
H3BKN2	Agps	0	0	0	0	0	0	NA	NA
A2AL50	Agps	0	0	0	0	0	0	NA	NA
A2AL49	Agps	0	0	0	0	0	0	NA	NA
A0A494BAB5	Atad1	2	1	0	1	0	1	NA	NA
F8VPX1	Usp7	7	0	8	0	0	0	NA	Ubiquitin carboxyl-terminal hydrolase 7 OS=Mus musculus OX=10090 GN=Usp7 PE=1 SV=1
E9PXY8	Usp7	7	0	8	0	0	0	NA	Ubiquitin carboxyl-terminal hydrolase 7 OS=Mus musculus OX=10090 GN=Usp7 PE=1 SV=1
Q99K94	Stat1	0	0	0	0	0	0	NA	NA
Q8C3V4	Stat1	15	7	6	0	0	1	NA	Signal transducer and activator of transcription OS=Mus musculus OX=10090 GN=Stat1 PE=1 SV=1
A0A087WSP5	Stat1	15	7	6	0	0	1	NA	Signal transducer and activator of transcription OS=Mus musculus OX=10090 GN=Stat1 PE=1 SV=1
A0A087WRI1	Stat1	0	0	0	0	0	0	NA	NA
Q8CFQ1	Stat1	0	0	0	0	0	0	NA	NA
A0A494BAG7	Bloc1s2	2	2	0	0	0	0	NA	NA
A0A0J9YUT8	Rbm19	3	0	1	1	1	0	NA	Probable RNA-binding protein 19 OS=Mus musculus OX=10090 GN=Rbm19 PE=1 SV=1
E9Q1V9	Camk2d	10	8	9	0	0	3	NA	Calcium/calmodulin-dependent protein kinase type II subunit delta OS=Mus musculus OX=10090 GN=Camk2d PE=1 SV=2
Q68EG2	Camk2b	0	0	0	1	0	0	NA	NA
Q3TWV4	Ap2m1	0	5	0	1	0	2	NA	NA
A0A338P6T4	Ap2m1	0	0	0	0	0	0	NA	NA
A0A0A6YXF6	Rhoa	3	0	0	3	5	1	Carbamidomethylation	NA
Q9D1Q5	Serpinb3b	1	1	1	1	0	1	NA	MCG21235 OS=Mus musculus OX=10090 GN=Serpinb3b PE=2 SV=1
A2RSF9	Serpinb3c	0	0	0	1	0	0	NA	NA
Q6UKZ0	Serpinb3d	0	1	0	1	2	1	NA	NA
G3X9V8	Serpinb3a	1	1	1	1	0	1	NA	MCG129038 OS=Mus musculus OX=10090 GN=Serpinb3a PE=1 SV=1
A0A0U1RPE7	Hspbp1	0	1	0	0	1	0	NA	NA
A0A0U1RQ49	Hspbp1	0	1	0	0	1	0	NA	NA
A0A0U1RPF2	Hspbp1	0	1	0	0	1	0	NA	NA
F7DE82	Slirp	0	0	0	0	0	0	NA	NA
F8WHU8	Slirp	0	0	0	0	0	0	NA	NA
Q3TUQ5	Pnn	32	26	17	1	0	2	NA	Pinin OS=Mus musculus OX=10090 GN=Pnn PE=1 SV=1
A0A075B5U6	Ighv1-20	0	2	0	5	0	0	NA	NA
A0A0A6YX66	Ighv1-20	0	2	0	5	0	0	NA	NA
A0A075B5V1	Ighv1-31	0	2	0	5	0	0	NA	NA
A0A075B5V7	Ighv1-43	0	0	0	5	0	0	NA	NA
A0A075B5V6	Ighv1-42	0	0	0	5	0	0	NA	NA
A0A075B5T4	Ighv1-4	0	2	3	5	8	9	Carbamidomethylation	Immunoglobulin heavy variable 1-4 (Fragment) OS=Mus musculus OX=10090 GN=Ighv1-4 PE=4 SV=1
A0A075B5X5	Ighv1-66	0	0	0	5	5	7	Carbamidomethylation	NA
A0A0A6YWK5	Ighv1-31	0	2	0	5	0	0	NA	NA
A0A0A6YY38	Ighv1-42	0	2	0	5	0	0	NA	NA
A0A075B5U7	Ighv1-22	0	0	0	5	0	0	NA	NA
A0A075B5V5	Ighv1-39	0	0	0	5	0	0	NA	NA
A0A075B5W6	Ighv1-55	0	2	0	5	0	0	NA	NA
A0A075B5W1	Ighv1-50	0	2	0	5	0	0	NA	NA
A0A0A6YXN5	Ighv1-43	0	0	0	5	0	0	NA	NA
A0A075B5X3	Ighv1-64	0	2	0	5	0	0	NA	NA
A0A0G2JDV6	Ubap2l	4	3	4	0	0	0	NA	Ubiquitin associated protein 2-like isoform CRA_g OS=Mus musculus OX=10090 GN=Ubap2l PE=1 SV=1
E0CYU5	Mat2b	1	1	0	1	0	0	NA	NA
A0A0G2JE93	Stard3nl	0	0	0	1	1	3	Acetylation (Protein N-term)	NA
A0A1Y7VJA7	Stard3nl	0	0	0	1	1	3	Acetylation (Protein N-term)	NA
A0A0G2JFP4	Frrs1	0	0	0	3	1	0	NA	NA
A0A1B0GRU8	Prpf40a	8	6	3	1	0	0	NA	Pre-mRNA-processing factor 40 homolog A OS=Mus musculus OX=10090 GN=Prpf40a PE=1 SV=1
A0A140LIL2	Tspan32	0	0	0	4	0	0	NA	NA
G3X9S3	Tspan32	0	0	0	4	0	0	NA	NA
Q7TNQ7	Tspan32	0	0	0	4	0	0	NA	NA
Q3U3L6	Tspan32	0	0	0	4	3	0	NA	NA
F6TQN1	Rnf19b	0	0	0	1	0	0	NA	NA
E9Q9N6	Mark2	0	0	0	0	0	0	NA	NA
E9PYX3	Mark2	0	0	0	0	0	0	NA	NA
A0A0R4J0B1	Mark2	0	0	0	0	0	0	NA	NA
Q3T9A3	Mark2	0	0	3	1	1	2	NA	Non-specific serine/threonine protein kinase OS=Mus musculus OX=10090 GN=Mark2 PE=1 SV=1
F6ZS70	Mark2	0	0	3	0	1	2	NA	Non-specific serine/threonine protein kinase (Fragment) OS=Mus musculus OX=10090 GN=Mark2 PE=1 SV=1
E9QMP6	Mark2	0	0	3	0	0	2	NA	Non-specific serine/threonine protein kinase OS=Mus musculus OX=10090 GN=Mark2 PE=1 SV=2
A0A087WP83	Hdlbp	0	1	0	1	0	0	NA	NA
A0A1D5RMF7	B4galnt3	0	0	0	0	1	0	NA	NA
A0A0R4J212	Nedd9	4	0	3	2	0	0	NA	Enhancer of filamentation 1 OS=Mus musculus OX=10090 GN=Nedd9 PE=1 SV=1
G3UXW9	Gps1	6	2	3	0	0	0	NA	COP9 signalosome complex subunit 1 OS=Mus musculus OX=10090 GN=Gps1 PE=1 SV=1
A0A140LJB7	Gps1	0	0	3	0	0	0	NA	COP9 signalosome complex subunit 1 OS=Mus musculus OX=10090 GN=Gps1 PE=1 SV=1
Q3MIA8	Gps1	6	2	3	0	0	0	NA	COP9 signalosome complex subunit 1 OS=Mus musculus OX=10090 GN=Gps1 PE=1 SV=1
E9PWR7	Evi5	0	0	0	0	0	0	NA	NA
F7ARZ1	Mrps23	0	0	0	1	0	0	NA	NA
Q5SXC9	Mrps23	0	0	0	1	0	0	NA	NA
E9Q8T1	Tacc2	0	0	0	3	3	0	NA	NA
A0A1L1SS37	Tacc2	0	0	0	3	3	0	NA	NA
A0A140LHH8	Tacc2	0	0	0	3	3	0	NA	NA
E9QP19	Trim33	0	0	0	0	0	2	NA	NA
E9PXI0	Vav1	5	1	6	1	0	3	NA	Proto-oncogene vav OS=Mus musculus OX=10090 GN=Vav1 PE=1 SV=1
Q8C7X8	Bri3	0	0	0	1	0	0	NA	NA
E9PUB2	Bri3	0	0	0	1	0	0	NA	NA
A0A1W2P756	Timm13	1	0	0	0	1	0	NA	NA
E9PWE8	Dpysl3	0	1	0	0	0	0	NA	NA
F6ZHD8	Gbe1	0	0	10	0	0	6	Acetylation (Protein N-term)	1 4-alpha-glucan-branching enzyme OS=Mus musculus OX=10090 GN=Gbe1 PE=1 SV=2
A2AFQ9	Gemin5	0	0	0	0	1	0	NA	NA
E9PUU4	Gemin5	50	50	26	0	1	0	NA	Gem-associated protein 5 OS=Mus musculus OX=10090 GN=Gemin5 PE=1 SV=1
E9PZ43	Map4	0	0	0	1	0	0	NA	NA
A0A0G2JDN7	Map4	0	0	0	0	0	0	NA	NA
A0A0G2JFH2	Map4	0	0	0	1	0	0	NA	NA
A0A0G2JFK3	Map4	0	0	0	0	0	0	NA	NA
A0A0G2JDY5	Map4	0	0	0	0	0	0	NA	NA
A0A0G2JG35	Map4	0	0	0	1	0	0	NA	NA
A0A140T8T5	Map4	0	0	0	1	0	0	NA	NA
A0A0G2JFT4	Map4	0	0	0	0	0	0	NA	NA
A0A1L1SRY8	Mrpl4	0	1	0	0	0	1	NA	NA
H3BJU7	Arhgef2	19	21	4	2	1	0	NA	Rho guanine nucleotide exchange factor 2 OS=Mus musculus OX=10090 GN=Arhgef2 PE=1 SV=1
H3BJX8	Arhgef2	19	21	4	2	1	0	NA	Rho guanine nucleotide exchange factor 2 OS=Mus musculus OX=10090 GN=Arhgef2 PE=1 SV=1
H3BJ45	Arhgef2	19	21	4	2	1	1	NA	Rho guanine nucleotide exchange factor 2 OS=Mus musculus OX=10090 GN=Arhgef2 PE=1 SV=1
H3BJ40	Arhgef2	19	21	4	2	1	0	NA	Rho guanine nucleotide exchange factor 2 OS=Mus musculus OX=10090 GN=Arhgef2 PE=1 SV=1
H3BKH9	Arhgef2	19	21	4	2	1	0	NA	Rho guanine nucleotide exchange factor 2 OS=Mus musculus OX=10090 GN=Arhgef2 PE=1 SV=1
E9Q8R5	Trabd	0	0	0	0	0	1	NA	NA
E9Q7A5	Trabd	0	0	0	0	0	0	NA	NA
A0A0R4J0D0	Snx20	0	0	0	1	0	2	Carbamidomethylation	NA
Q8BVV6	Eif5	0	3	2	0	0	0	NA	Eukaryotic translation initiation factor 5 OS=Mus musculus OX=10090 GN=Eif5 PE=1 SV=1
F6S0R8	Sccpdh	0	0	0	0	0	0	NA	NA
A0A0R4J138	Arsb	0	0	0	0	1	2	NA	NA
D3YX87	Msto1	0	0	0	0	0	0	NA	NA
A0A0R4J175	Brd9	0	4	2	0	0	0	NA	Bromodomain-containing protein 9 OS=Mus musculus OX=10090 GN=Brd9 PE=1 SV=1
A2AAN2	Srp68	4	3	1	0	1	0	NA	Signal recognition particle subunit SRP68 OS=Mus musculus OX=10090 GN=Srp68 PE=1 SV=1
D3YUP1	Carm1	0	0	1	2	1	0	NA	Histone-arginine methyltransferase CARM1 OS=Mus musculus OX=10090 GN=Carm1 PE=1 SV=1
Q91XX0	Pcdhgc4	0	1	1	0	0	1	NA	MCG133388 isoform CRA_r OS=Mus musculus OX=10090 GN=Pcdhgc4 PE=1 SV=1
H3BIV7	Ppp2r1b	6	0	0	0	0	0	NA	NA
H3BLQ0	Ppp2r1b	0	0	0	0	0	0	NA	NA
H3BLE7	Ppp2r1b	0	0	0	1	0	0	NA	NA
Q3TTF6	Ppp2r1b	6	0	0	1	1	0	NA	NA
H3BKU1	Ppp2r1b	6	0	0	0	0	0	NA	NA
G3UWS4	Ppp2r1b	6	0	0	1	0	0	NA	NA
Q5SXC4	Vezf1	0	0	0	1	0	2	NA	NA
Q5NBZ2	Patz1	0	0	0	0	0	0	NA	NA
Q5NBZ1	Patz1	0	0	0	0	0	0	NA	NA
Q9JMG9	Patz1	0	0	0	0	0	0	NA	NA
Q5NBY9	Patz1	0	0	0	0	0	0	NA	NA
Q8VCR4	Trmt112	3	0	0	3	0	0	NA	NA
A2ARI1	Tmx4	0	0	0	0	0	0	NA	NA
A2ARI0	Tmx4	0	0	0	0	0	0	NA	NA
A0A494BB26	Haus1	1	1	1	0	0	0	NA	HAUS augmin-like complex subunit 1 OS=Mus musculus OX=10090 GN=Haus1 PE=1 SV=1
A0A1W2P6N1	Lsm7	1	0	0	1	1	0	NA	NA
G8JL68	Myef2	0	0	0	0	0	0	NA	NA
F6XJA1	Myef2	0	0	0	0	0	0	NA	NA
A2ATP5	Myef2	5	3	4	3	1	0	NA	Myelin expression factor 2 OS=Mus musculus OX=10090 GN=Myef2 PE=1 SV=1
A2ATP6	Myef2	5	3	4	3	1	1	Acetylation (Protein N-term)	Myelin expression factor 2 OS=Mus musculus OX=10090 GN=Myef2 PE=1 SV=2
F8WIR1	Ctsd	5	0	5	3	0	7	Carbamidomethylation; Oxidation (M)	Cathepsin D OS=Mus musculus OX=10090 GN=Ctsd PE=1 SV=2
H3BJT9	Mrpl17	0	0	0	0	0	0	NA	NA
H3BIZ3	Mrpl17	0	0	0	0	0	0	NA	NA
Q91VA7	Idh3b	7	4	0	0	0	0	NA	NA
A0A1W2P720	Sar1a	0	0	0	0	0	0	NA	NA
A0A1W2P869	Sar1a	0	0	0	0	0	0	NA	NA
A0A1W2P6N3	Sar1a	0	0	0	0	0	0	NA	NA
Q99JZ4	Sar1a	0	0	0	0	0	0	NA	NA
A2ALV7	Ecpas	0	0	1	0	0	2	NA	Proteasome adapter and scaffold protein ECM29 (Fragment) OS=Mus musculus OX=10090 GN=Ecpas PE=1 SV=1
E9Q4K9	Smurf1	0	0	0	0	0	0	NA	NA
E9PYU8	Smurf1	0	0	0	0	0	0	NA	NA
Q8C257	Il18r1	0	0	0	1	1	0	NA	NA
D3Z3S1	Preb	0	1	0	1	2	4	NA	NA
F6QFD1	Pde4d	0	0	1	0	0	1	NA	Phosphodiesterase (Fragment) OS=Mus musculus OX=10090 GN=Pde4d PE=1 SV=1
E9PU96	Urb1	0	0	0	1	2	0	NA	NA
F6XMS4	Pus7	0	0	0	0	0	0	NA	NA
E9QKE9	Cux1	1	0	0	3	2	0	NA	NA
H3BLS0	Cux1	1	0	0	3	2	0	NA	NA
H3BJQ9	Cux1	1	0	0	3	2	0	NA	NA
H3BK24	Cux1	1	0	0	3	2	0	NA	NA
A0A1Y7VKZ4	Bzw2	0	1	0	2	1	0	NA	NA
A2AK44	Cwc22rt3	0	0	0	0	0	0	NA	NA
A2A6Q8	Myl4	4	7	0	0	0	0	NA	NA
Q9CZ19	Myl4	4	7	0	0	0	0	NA	NA
A0A2I3BPD0	Atp6v1c1	0	0	0	0	0	0	NA	NA
A0A0J9YUE9	Dnm1	0	1	0	0	0	0	NA	NA
A0A0R4IZY1	Dtx2	0	0	0	0	0	2	NA	NA
Q9CX65	Senp7	0	0	0	0	0	0	NA	NA
E9Q1L5	Senp7	0	0	0	0	0	0	NA	NA
B1ASL6	Tnfrsf18	0	0	0	0	0	0	NA	NA
D3Z7F7	Cpped1	0	0	0	0	1	0	NA	NA
H3BIY9	Ap2b1	0	0	0	1	1	1	Carbamidomethylation	NA
A0A087WQS2	Bzw1	1	0	0	1	0	3	NA	NA
A0A087WS48	Bzw1	0	0	0	1	0	0	NA	NA
F6YCA7	Cops3	0	0	0	0	0	0	NA	NA
A0A286YDB7	Ssr1	0	1	0	0	0	0	NA	NA
A0A286YCT4	Ssr1	0	1	0	0	0	0	NA	NA
A0A286YCG8	Ssr1	0	1	0	0	0	0	NA	NA
H3BKQ6	Snx17	0	0	0	0	0	0	NA	NA
D3Z3J1	Snx17	0	0	0	0	0	0	NA	NA
H3BKG9	Snx17	0	0	0	0	0	0	NA	NA
A0A0N4SUI1	Vsig10l	0	0	0	0	0	0	NA	NA
Q91V89	Ppp2r5d	0	0	0	0	0	0	NA	NA
Q7TNL5	Ppp2r5d	0	0	0	0	0	0	NA	NA
A0A087WQF8	Ktn1	4	5	1	1	0	1	NA	Kinectin OS=Mus musculus OX=10090 GN=Ktn1 PE=1 SV=1
A0A087WP48	Ktn1	4	5	1	1	0	1	NA	Kinectin OS=Mus musculus OX=10090 GN=Ktn1 PE=1 SV=1
A0A087WS04	Ktn1	4	5	1	1	0	1	NA	Kinectin OS=Mus musculus OX=10090 GN=Ktn1 PE=1 SV=1
A0A087WS29	Ktn1	4	5	1	1	0	1	NA	Kinectin OS=Mus musculus OX=10090 GN=Ktn1 PE=1 SV=1
A0A087WQG4	Ktn1	4	5	1	1	0	1	NA	Kinectin OS=Mus musculus OX=10090 GN=Ktn1 PE=1 SV=1
A0A087WNW3	Ktn1	4	5	1	1	0	1	NA	Kinectin OS=Mus musculus OX=10090 GN=Ktn1 PE=1 SV=1
A0A087WQD0	Ktn1	4	5	1	1	0	1	NA	Kinectin OS=Mus musculus OX=10090 GN=Ktn1 PE=1 SV=1
A0A087WQI3	Ktn1	4	5	1	1	0	1	NA	Kinectin OS=Mus musculus OX=10090 GN=Ktn1 PE=1 SV=1
A0A087WPW5	Ktn1	4	5	1	0	0	1	NA	Kinectin OS=Mus musculus OX=10090 GN=Ktn1 PE=1 SV=1
A0A087WS23	Ktn1	4	5	1	0	0	1	NA	Kinectin OS=Mus musculus OX=10090 GN=Ktn1 PE=1 SV=1
A0A087WQ25	Ktn1	4	5	1	0	0	1	NA	Kinectin OS=Mus musculus OX=10090 GN=Ktn1 PE=1 SV=1
A0A087WP85	Ktn1	4	5	1	0	0	1	NA	Kinectin OS=Mus musculus OX=10090 GN=Ktn1 PE=1 SV=1
A0A087WQQ5	Ktn1	4	5	1	1	0	1	NA	Kinectin OS=Mus musculus OX=10090 GN=Ktn1 PE=1 SV=1
A0A087WRS1	Ktn1	4	5	1	0	0	1	NA	Kinectin OS=Mus musculus OX=10090 GN=Ktn1 PE=1 SV=1
A0A087WP14	Ktn1	4	5	1	1	0	1	NA	Kinectin OS=Mus musculus OX=10090 GN=Ktn1 PE=1 SV=1
A0A087WPX0	Ktn1	4	5	1	1	0	1	NA	Kinectin OS=Mus musculus OX=10090 GN=Ktn1 PE=1 SV=1
F8VQC7	Ktn1	4	5	1	1	0	1	NA	Kinectin OS=Mus musculus OX=10090 GN=Ktn1 PE=1 SV=1
A0A0N4SUH8	Nfu1	0	0	0	1	0	0	NA	NA
Q3V3P1	Top3a	0	0	0	0	0	0	NA	NA
A0A494BB31	Txnl1	0	0	0	0	0	0	NA	NA
A0A494BBI1	Txnl1	0	3	0	0	0	0	NA	NA
A0A494B955	Txnl1	0	3	0	0	0	0	NA	NA
A0A498WGD8	Txnl1	3	3	0	0	0	5	NA	NA
F6SBR5	Cit	0	0	0	0	0	0	NA	NA
D3Z1U0	Cit	0	0	0	0	0	0	NA	NA
E9QL53	Cit	0	0	0	0	0	0	NA	NA
D3YU89	Cit	0	0	0	0	0	0	NA	NA
A0A0R4J255	Odf4	0	0	0	0	0	0	NA	NA
A0A1B0GSX7	Nup98	5	1	0	0	1	0	NA	NA
A0A338P6D4	Heg1	0	0	0	0	0	0	NA	NA
E9Q440	Heg1	0	0	0	0	0	0	NA	NA
Q9JLI0	Akr1c12	0	0	3	1	0	0	NA	Aldo-keto reductase a OS=Mus musculus OX=10090 GN=Akr1c12 PE=1 SV=1
F8WIE5	Hectd1	2	0	0	3	0	0	NA	NA
B1AYL0	Scn9a	0	0	0	0	0	0	NA	NA
E9PW82	Scn9a	0	0	0	0	0	0	NA	NA
F8VPQ7	Scn9a	0	0	0	0	0	0	NA	NA
A0A0U1RQ61	Ptcd3	0	0	0	0	0	0	NA	NA
B1AUN3	Eif2b3	10	7	2	1	2	0	NA	Eukaryotic translation initiation factor 2B subunit 3 OS=Mus musculus OX=10090 GN=Eif2b3 PE=1 SV=1
Q3UKV0	Eif2b3	10	7	2	1	2	0	NA	Eukaryotic translation initiation factor 2B subunit 3 OS=Mus musculus OX=10090 GN=Eif2b3 PE=1 SV=1
B1AUN2	Eif2b3	10	7	0	1	2	0	NA	NA
E9Q6A2	Serpine3	0	0	0	0	0	0	NA	NA
A0A1D5RLV7	Wdfy3	0	0	0	0	0	0	NA	NA
G3UYW1	Wdfy3	0	0	0	0	0	0	NA	NA
A2AVE0	Il9r	0	0	0	0	2	2	Carbamidomethylation	NA
B7ZD65	Il9r	0	0	0	0	2	2	Carbamidomethylation	NA
A0A0A6YXP3	Mbnl1	0	0	1	0	0	0	NA	Muscleblind-like protein 1 (Fragment) OS=Mus musculus OX=10090 GN=Mbnl1 PE=1 SV=1
A0A0A6YWB0	Mbnl1	0	0	1	0	0	0	NA	Muscleblind-like protein 1 OS=Mus musculus OX=10090 GN=Mbnl1 PE=1 SV=1
G3X9Q0	Mbnl1	0	0	1	0	0	0	NA	Muscleblind-like 1 (Drosophila) isoform CRA_a OS=Mus musculus OX=10090 GN=Mbnl1 PE=1 SV=1
A0A0A6YVV8	Mbnl1	0	0	1	0	0	0	NA	Muscleblind-like protein 1 OS=Mus musculus OX=10090 GN=Mbnl1 PE=1 SV=1
D3Z4Z0	Tada2b	0	0	0	0	0	1	NA	NA
E9Q4T0	Hjurp	4	3	1	0	0	0	NA	Holliday junction recognition protein OS=Mus musculus OX=10090 GN=Hjurp PE=1 SV=1
E9QKG8	Hjurp	4	3	0	0	0	0	NA	NA
E9PV45	Usp24	0	0	1	1	0	0	NA	Ubiquitin carboxyl-terminal hydrolase 24 OS=Mus musculus OX=10090 GN=Usp24 PE=1 SV=1
Q3U3A7	Mta3	8	0	6	1	0	1	NA	Metastasis-associated protein MTA3 OS=Mus musculus OX=10090 GN=Mta3 PE=1 SV=1
E9Q794	Mta3	8	0	6	1	0	1	NA	Metastasis-associated protein MTA3 OS=Mus musculus OX=10090 GN=Mta3 PE=1 SV=1
Q3UII8	Mta3	8	0	6	1	0	1	NA	Metastasis-associated protein MTA3 OS=Mus musculus OX=10090 GN=Mta3 PE=1 SV=1
E9Q3W4	Plec	0	18	0	1	1	7	NA	NA
E9QNX9	Igf1r	1	0	0	0	0	0	NA	NA
E9QKL0	Rad54l2	0	0	0	0	0	0	NA	NA
E9PYM7	Man2c1	2	0	0	0	1	0	NA	NA
E9PZ88	Man2c1	0	2	4	0	1	0	NA	Alpha-mannosidase 2C1 OS=Mus musculus OX=10090 GN=Man2c1 PE=1 SV=1
F8WIE1	Man2c1	2	2	4	0	1	2	Carbamidomethylation	Alpha-mannosidase 2C1 OS=Mus musculus OX=10090 GN=Man2c1 PE=1 SV=1
F8WIT2	Anxa6	2	0	0	0	0	4	NA	NA
A0A0N4SVU8	Tmem176a	0	0	0	0	0	0	NA	NA
A0A0N4SVW3	Tmem176a	0	0	0	0	0	0	NA	NA
D3Z1J2	Ccdc112	0	0	0	0	0	0	NA	NA
H3BL37	Tcof1	0	0	0	0	0	0	NA	NA
F6R3V4	Tcof1	0	0	0	0	0	0	NA	NA
D3YY07	Zdhhc13	1	0	0	0	1	0	NA	NA
V9GXD9	Synrg	1	1	0	0	0	0	NA	NA
V9GX40	Synrg	1	1	0	0	0	0	NA	NA
H3BK45	Cbx7	0	0	0	0	0	0	NA	NA
A0A0U1RPI0	1110004F10Rik	0	0	0	0	0	1	NA	NA
A0A0U1RPJ7	1110004F10Rik	0	0	0	0	0	1	NA	NA
D6RI64	1110004F10Rik	0	0	0	0	0	1	NA	NA
D3YVR9	1110004F10Rik	0	0	0	0	0	1	NA	NA
A2ATI8	Gorasp2	0	0	0	0	0	0	NA	NA
A2ATI6	Gorasp2	0	0	0	0	0	0	NA	NA
A2ATI9	Gorasp2	0	0	0	0	0	0	NA	NA
G3UZQ4	Sra1	0	0	0	0	0	0	NA	NA
E9PZ87	Pappa2	0	0	0	0	0	0	NA	NA
A0A286YDR8	Kif13a	0	0	0	0	0	0	NA	NA
F8VQ75	Kif13a	0	0	0	0	0	0	NA	NA
E9Q8N1	Ttn	2	3	3	1	0	1	NA	Titin OS=Mus musculus OX=10090 GN=Ttn PE=1 SV=1
E9Q8K5	Ttn	2	3	3	1	0	1	NA	Titin OS=Mus musculus OX=10090 GN=Ttn PE=1 SV=1
Q5EC55	Amh	0	0	0	0	0	0	NA	NA
F6SMY7	Mycbp2	0	0	0	0	0	0	NA	NA
A0A0J9YVB4	Maea	0	0	0	0	0	0	NA	NA
Q504P4	Hspa8	0	0	0	1145	0	0	NA	NA
A3KGU5	Sptan1	521	510	380	167	106	0	NA	Spectrin alpha chain non-erythrocytic 1 OS=Mus musculus OX=10090 GN=Sptan1 PE=1 SV=1
E9Q447	Sptan1	0	0	0	167	106	0	NA	NA
A3KGU7	Sptan1	0	0	0	165	0	74	Carbamidomethylation; Oxidation (M)	NA
A3KGU9	Sptan1	0	0	0	165	0	74	Carbamidomethylation; Oxidation (M)	NA
A2A513	Krt10	0	0	144	162	150	192	Oxidation (M)	Keratin type I cytoskeletal 10 OS=Mus musculus OX=10090 GN=Krt10 PE=1 SV=1
A0A140T8M0	Igkv1-117	0	37	0	128	80	184	Carbamidomethylation; Acetylation (Protein N-term)	NA
E9QN52	Lrrfip2	216	158	0	79	107	101	Carbamidomethylation; Oxidation (M)	NA
D3Z2H9	Tpm3-rs7	219	197	0	65	78	0	NA	NA
A2AW05	Ssrp1	36	0	0	44	0	0	NA	NA
B1AXW5	Prdx1	0	0	0	43	0	0	NA	NA
B1AXW6	Prdx1	0	0	0	43	0	0	NA	NA
A0A494B9F5	Ndfip1	0	16	0	43	0	0	NA	NA
V9GXQ2	NA	90	70	68	36	33	25	NA	Predicted gene 17087 OS=Mus musculus OX=10090 GN=Gm17087 PE=1 SV=1
Q9D6T8	2310057N15Rik	0	0	0	34	0	0	NA	NA
E9Q453	Tpm1	0	0	0	30	0	22	Acetylation (Protein N-term); Oxidation (M)	NA
E9Q456	Tpm1	111	126	0	30	0	22	Acetylation (Protein N-term); Oxidation (M)	NA
F8WHZ9	Add1	0	0	0	30	0	0	NA	NA
F8WGR0	Add1	244	192	0	30	0	0	NA	NA
E9QNP3	Hrnr	0	0	0	25	0	0	NA	NA
F8WJ23	Hrnr	0	0	0	25	0	0	NA	NA
D3Z724	Gm5965	0	0	0	24	0	0	NA	NA
Q91YZ8	Pabpc4	0	0	79	23	29	20	Carbamidomethylation	Polyadenylate-binding protein OS=Mus musculus OX=10090 GN=Pabpc4 PE=1 SV=1
A3KFU8	Pabpc4	0	0	79	23	29	20	Carbamidomethylation	Polyadenylate-binding protein OS=Mus musculus OX=10090 GN=Pabpc4 PE=1 SV=1
A0A0R4J1L2	Eef1d	24	29	24	23	0	0	NA	Elongation factor 1-delta OS=Mus musculus OX=10090 GN=Eef1d PE=1 SV=1
O88375	Krtap13	0	0	0	22	0	0	NA	NA
A2BIN1	Mup10	2	3	1	20	0	0	NA	Major urinary protein 10 OS=Mus musculus OX=10090 GN=Mup10 PE=2 SV=1
Q4FZE8	Mup22	2	3	1	20	0	0	NA	Major urinary protein 1 OS=Mus musculus OX=10090 GN=Mup22 PE=1 SV=1
Z4YKV1	Gnas	5	4	4	19	0	0	NA	Guanine nucleotide-binding protein G(s) subunit alpha isoforms short OS=Mus musculus OX=10090 GN=Gnas PE=1 SV=1
Q9D746	2310034C09Rik	0	0	0	19	0	0	NA	NA
A2AKN8	Mup8	2	3	1	18	0	0	NA	Major urinary protein 5 OS=Mus musculus OX=10090 GN=Mup8 PE=3 SV=1
A2AIM4	Tpm2	66	0	51	17	0	0	NA	Tropomyosin beta chain OS=Mus musculus OX=10090 GN=Tpm2 PE=1 SV=1
A0A087WPL5	Dhx9	0	0	0	16	0	14	Carbamidomethylation	NA
Q68FG2	Sptbn2	0	0	10	16	0	0	NA	Spectrin beta chain OS=Mus musculus OX=10090 GN=Sptbn2 PE=1 SV=1
A0A0N4SVC2	Tra2a	0	0	0	15	15	8	Acetylation (Protein N-term)	NA
Q6IFZ8	Gm5414	0	0	0	14	0	30	NA	NA
A0A140T8T4	Rpl9-ps6	15	7	6	13	0	4	NA	Ribosomal protein L9 pseudogene 6 OS=Mus musculus OX=10090 GN=Rpl9-ps6 PE=4 SV=1
A0A1B0GQU8	Rpl18	0	0	0	11	0	10	NA	NA
A0A087WRY3	Nucks1	0	0	0	11	0	0	NA	NA
A2ADR8	Ppp1r8	0	2	1	10	0	0	NA	Nuclear inhibitor of protein phosphatase 1 OS=Mus musculus OX=10090 GN=Ppp1r8 PE=1 SV=1
B0V2N8	Anxa2	0	0	0	9	0	0	NA	NA
B0V2N7	Anxa2	0	0	0	9	0	0	NA	NA
F7BUB8	Epb41	0	0	0	9	0	0	NA	NA
E9Q855	Scamp3	0	0	0	8	0	14	NA	NA
Q3UXS0	Scamp3	0	0	0	8	0	14	NA	NA
A0A494BB86	Actr1a	0	0	11	8	0	10	Carbamidomethylation; Oxidation (M)	Alpha-centractin OS=Mus musculus OX=10090 GN=Actr1a PE=1 SV=1
A2BI12	Psip1	0	0	3	8	2	3	NA	PC4 and SFRS1-interacting protein OS=Mus musculus OX=10090 GN=Psip1 PE=1 SV=1
Q99N15	Hsd17b10	0	2	4	7	12	0	NA	17beta-hydroxysteroid dehydrogenase type 10/short chain L-3-hydroxyacyl-CoA dehydrogenase OS=Mus musculus OX=10090 GN=Hsd17b10 PE=1 SV=1
A0A286YE28	Tkt	0	2	5	7	4	0	NA	Transketolase (Fragment) OS=Mus musculus OX=10090 GN=Tkt PE=1 SV=1
Q3TML0	Pdia6	16	16	0	6	9	1	NA	NA
G3X926	Rpf2	0	0	0	5	3	1	NA	NA
A0A075B5V9	Ighv1-49	0	0	0	5	0	0	NA	NA
A0A0A6YWX2	Ighv1-49	0	0	0	5	0	0	NA	NA
A0A075B5V0	Ighv1-26	0	0	0	5	0	0	NA	NA
A0A075B5V3	Ighv1-36	0	0	0	5	0	8	Carbamidomethylation	NA
A0A0A6YXT2	Ighv1-36	0	0	0	5	0	8	Carbamidomethylation	NA
A0A075B5U5	Ighv1-19	0	0	0	5	0	8	Carbamidomethylation	NA
A0A075B5X7	Ighv1-69	0	0	0	5	0	0	NA	NA
A0A075B5X0	Ighv1-59	0	0	0	5	0	0	NA	NA
A0A075B5W2	Ighv1-52	0	0	0	5	0	0	NA	NA
A0A0G2JFS5	Ighv1-69	0	0	0	5	0	0	NA	NA
A0A0A6YXE0	Ighv1-59	0	0	0	5	0	0	NA	NA
A0A075B5W3	Ighv1-53	0	0	0	5	0	0	NA	NA
A0A0A6YXC3	Ighv1-52	0	0	0	5	0	0	NA	NA
A0A075B5V2	Ighv1-34	0	0	0	5	0	0	NA	NA
A0A0A6YWX0	Ighv1-19	0	0	0	5	0	8	Carbamidomethylation	NA
Q3UDD3	Poldip3	0	0	0	5	0	0	NA	NA
F6ZBL2	Mib1	0	0	0	4	0	0	NA	NA
D3YXU1	Hadhb	0	0	0	4	0	3	NA	NA
D3Z4U0	Zranb2	4	4	11	4	5	11	Carbamidomethylation	Zinc finger Ran-binding domain-containing protein 2 OS=Mus musculus OX=10090 GN=Zranb2 PE=1 SV=2
D3Z3F1	Fip1l1	0	0	0	4	0	0	NA	NA
E9QKK8	Atp11c	0	0	0	4	2	8	Carbamidomethylation	NA
F6Q8D3	Atp11c	0	0	0	4	0	8	Carbamidomethylation	NA
G3UYV7	Rps28	7	5	3	4	0	0	NA	40S ribosomal protein S28 (Fragment) OS=Mus musculus OX=10090 GN=Rps28 PE=1 SV=1
A0A3Q4EI12	Rab18	1	0	0	4	0	0	NA	NA
Z4YJD9	Krt12	5	0	0	4	2	6	NA	NA
E9PYU4	Chd5	0	0	0	4	0	0	NA	NA
A0A0R4J0Q5	Lmnb2	0	0	0	4	0	0	NA	NA
A0A1D5RLQ0	Nup93	0	3	0	4	1	0	NA	NA
Q9R1R8	Rdh11	0	0	0	3	2	0	NA	NA
A0A1D5RLU2	Psme3ip1	1	1	0	3	2	1	NA	NA
A0A1D5RLX7	Psme3ip1	1	1	0	3	2	1	NA	NA
A0A1D5RLW0	Psme3ip1	1	1	0	3	2	1	NA	NA
A0A0J9YUZ4	Hmgb1	1	0	0	3	0	0	NA	NA
A0A494BAD3	Cpt1a	0	0	0	3	0	5	Carbamidomethylation	NA
B1ASE2	Atp5pd	0	9	0	3	0	0	NA	NA
E9Q467	Abcc4	0	0	0	3	2	4	NA	NA
E9Q236	Abcc4	0	0	0	3	2	4	NA	NA
Z4YKT6	Dhrs7b	4	6	0	3	0	1	NA	NA
A0A0N4SVB8	Arl8b	0	0	0	3	1	0	NA	NA
A0A494BB95	Eif1a	0	0	0	3	0	0	NA	NA
Z4YLI8	Cluh	7	5	5	3	2	1	NA	Clustered mitochondria protein homolog OS=Mus musculus OX=10090 GN=Cluh PE=1 SV=1
F8WI65	Ahcyl2	2	2	0	3	2	0	NA	NA
F8WGT1	Ahcyl2	2	2	2	3	2	3	Acetylation (Protein N-term)	Adenosylhomocysteinase OS=Mus musculus OX=10090 GN=Ahcyl2 PE=1 SV=1
G3X9S2	Enpp1	0	0	0	3	0	0	NA	NA
A0A0R4J1Q7	Enpp1	0	0	0	3	0	0	NA	NA
E9Q798	Arf4	0	0	0	3	0	0	NA	NA
E9Q5D6	Ranbp9	10	8	15	3	3	3	Carbamidomethylation	Ran-binding protein 9 OS=Mus musculus OX=10090 GN=Ranbp9 PE=1 SV=1
A2AG68	Atp7a	0	0	0	3	1	3	NA	NA
Z4YNA9	AB124611	0	0	0	3	0	0	NA	NA
A0A0B4J1G2	AB124611	0	0	0	3	0	0	NA	NA
A0A2R8VJV3	Copz1	0	0	0	3	0	0	NA	NA
E9QJS1	Tyk2	0	0	0	3	1	5	NA	NA
Q5SW16	Pafah1b1	0	0	0	3	0	0	NA	NA
F6QHF1	Tap1	0	0	0	2	0	1	NA	NA
Q3TBA3	Tap1	4	2	0	2	0	1	NA	NA
A0A075B5N9	Igkv3-7	0	1	0	2	2	2	NA	NA
A0A0G2JE31	Igkv3-7	0	1	0	2	2	2	NA	NA
O09048	1110025L11Rik	0	0	0	2	0	0	NA	NA
D6RE33	Edc4	0	0	0	2	1	0	NA	NA
A0A0R4J047	Luc7l	4	4	0	2	0	0	NA	NA
D3Z315	Cope	0	0	4	2	0	0	NA	Coatomer subunit epsilon (Fragment) OS=Mus musculus OX=10090 GN=Cope PE=1 SV=1
G3UXG7	Csnk2b	7	5	8	2	2	0	NA	Casein kinase II subunit beta OS=Mus musculus OX=10090 GN=Csnk2b PE=1 SV=1
G3UXU2	Csnk2b	0	5	0	2	2	0	NA	NA
A0A2R8W6K5	Rbfox1	0	0	0	2	2	1	NA	NA
A0A2I3BRA9	Rbfox2	0	0	0	2	2	1	NA	NA
A0A2I3BRU6	Rbfox2	0	0	0	2	2	1	NA	NA
A0A2K6EDK7	Rbfox2	0	0	0	2	2	1	NA	NA
A0A0U1RPX0	Exosc5	0	0	0	2	0	0	NA	NA
A0A0U1RPC2	Exosc5	0	0	0	2	0	0	NA	NA
E9QB02	Mars1	9	4	8	2	2	0	NA	Methionine--tRNA ligase cytoplasmic OS=Mus musculus OX=10090 GN=Mars PE=1 SV=1
D3YYR5	P2rx4	0	0	0	2	0	0	NA	NA
Q9Z256	P2rx4	0	0	0	2	0	0	NA	NA
D3Z5U5	P2rx4	0	0	0	2	0	0	NA	NA
A0A0A6YYE7	Igkv4-57	0	0	0	2	1	0	NA	NA
F7AA45	Rbm39	5	5	0	2	0	3	NA	NA
E9Q8F0	Rbm39	5	5	0	2	0	3	NA	NA
B1AYJ9	Ola1	0	0	0	2	0	0	NA	NA
F6RX08	Tpr	0	0	0	2	0	0	NA	NA
D6RIN4	Dynll2	0	0	0	2	0	0	NA	NA
Q8BJZ7	Thyn1	0	0	0	2	0	0	NA	NA
E9PWY7	Slc29a1	0	0	0	2	0	0	NA	NA
A0A1Y7VM54	Tmed10	5	2	0	2	2	0	NA	NA
F6TBV1	NA	2	0	0	2	1	0	NA	NA
F6WHL0	NA	2	0	0	2	0	0	NA	NA
A2ADH1	Magt1	2	0	0	2	0	0	NA	NA
A0A0J9YUQ8	Gsn	0	0	0	2	0	0	NA	NA
E9PUR2	Myo18a	12	13	5	2	0	2	NA	Unconventional myosin-XVIIIa (Fragment) OS=Mus musculus OX=10090 GN=Myo18a PE=1 SV=2
D6REU0	Mindy3	0	0	0	2	4	0	NA	NA
A0A494BAJ5	Ccs	0	0	1	2	1	0	NA	Superoxide dismutase [Cu-Zn] OS=Mus musculus OX=10090 GN=Ccs PE=1 SV=1
A0A494BB58	Ccs	0	0	1	2	1	0	NA	Copper chaperone for superoxide dismutase OS=Mus musculus OX=10090 GN=Ccs PE=1 SV=1
A0A494BBF1	Ccs	0	0	1	2	1	0	NA	Copper chaperone for superoxide dismutase OS=Mus musculus OX=10090 GN=Ccs PE=1 SV=1
A0A0R4J0X5	Serpina1c	0	0	0	2	0	0	NA	NA
A0A0A0MQA3	Serpina1a	0	0	0	2	0	0	NA	NA
Q3UL50	Wdr74	0	0	0	2	0	0	NA	NA
B1AT92	Grb2	0	0	0	2	4	9	Carbamidomethylation	NA
A0A1B0GS30	Ric8a	1	0	0	2	0	0	NA	NA
A0A1L1ST61	Higd1a	0	0	0	2	0	0	NA	NA
A0A087WQR6	Tpp2	0	0	0	2	0	0	NA	NA
A0A0A0MQ97	Nccrp1	4	1	1	2	2	6	NA	F-box only protein 50 OS=Mus musculus OX=10090 GN=Nccrp1 PE=1 SV=1
A0A1W2P750	Ppp1r12a	0	0	0	2	0	0	NA	NA
G3X922	Dnajc13	3	4	0	2	0	0	NA	NA
D4AFX7	Dnajc13	3	4	0	2	0	0	NA	NA
A0A1B0GR64	Inppl1	0	0	0	2	0	0	NA	NA
A0A087WPT7	Inppl1	0	0	0	2	0	0	NA	NA
A0A140T8M4	Igkv8-19	0	0	0	2	3	0	NA	NA
A0A075B5N4	Igkv8-27	0	0	0	2	3	0	NA	NA
A0A140T8P7	Igkv8-21	0	0	0	2	3	0	NA	NA
A0A0G2JF28	Igkv8-27	0	0	0	2	3	0	NA	NA
A0A140T8M3	Igkv8-30	0	0	0	2	3	0	NA	NA
A0A0G2JFN8	Igkv8-19	0	0	0	2	3	0	NA	NA
F6W5Q8	Vta1	2	0	0	2	0	2	Acetylation (Protein N-term)	NA
Q68FM7	Arhgef11	0	0	0	2	0	0	NA	NA
E9Q0A3	Arhgef11	0	0	0	2	0	0	NA	NA
D3Z654	Lef1	0	0	0	2	0	0	NA	NA
Q8JZZ5	Pitpnb	0	0	0	2	4	0	NA	NA
A0A0U1RP47	Cbl	0	0	0	2	0	0	NA	NA
E9QPU2	Dnah12	0	0	0	2	0	0	NA	NA
A0A1W2P6E3	Stx11	0	0	0	2	0	0	NA	NA
A0A1W2P6Y3	Stx11	0	0	0	2	0	0	NA	NA
A0A286YD76	Macf1	0	0	0	2	0	0	NA	NA
A2AS44	Pkp4	0	0	0	2	1	0	NA	NA
A2AS45	Pkp4	0	0	0	2	1	0	NA	NA
A0A2R8VJM7	Tmem106c	0	0	0	1	0	0	NA	NA
A2AQA7	Aqr	18	13	15	1	0	0	NA	RNA helicase aquarius OS=Mus musculus OX=10090 GN=Aqr PE=1 SV=1
A0A1B0GR84	Tmem160	1	0	0	1	0	0	NA	NA
A0A2R8VK76	Cpsf1	0	0	0	1	1	1	NA	NA
F6RJV6	Lancl2	3	0	4	1	0	0	NA	LanC-like protein 2 (Fragment) OS=Mus musculus OX=10090 GN=Lancl2 PE=1 SV=1
Q9D8L3	Ssr4	2	1	0	1	2	0	NA	NA
D3YZC2	Men1	2	0	0	1	0	0	NA	NA
F8WHD9	Men1	2	0	0	1	0	0	NA	NA
A0A0X1KG66	NA	0	0	0	1	0	0	NA	NA
F8WHY8	Mta1	10	7	6	1	0	1	NA	Metastasis-associated protein MTA1 OS=Mus musculus OX=10090 GN=Mta1 PE=1 SV=1
E9PX23	Mta1	10	7	6	1	0	1	NA	Metastasis-associated protein MTA1 OS=Mus musculus OX=10090 GN=Mta1 PE=1 SV=1
E9PUF7	Arhgef1	0	1	0	1	0	0	NA	NA
A0A0R4J0J8	Specc1l	4	2	0	1	0	0	NA	NA
E9PUH6	Crls1	0	0	0	1	0	0	NA	NA
A0A0G2JDN0	Ltf	0	1	0	1	0	0	NA	NA
A0A0G2JGN1	Ltf	0	1	0	1	0	0	NA	NA
A0A0G2JFM6	Ltf	0	1	0	1	0	0	NA	NA
B1AWD8	Clta	9	12	3	1	0	0	NA	Clathrin light chain OS=Mus musculus OX=10090 GN=Clta PE=1 SV=1
B1AWD9	Clta	9	12	3	1	0	1	NA	Clathrin light chain OS=Mus musculus OX=10090 GN=Clta PE=1 SV=1
A2AEN9	Gm5938	0	0	0	1	0	0	NA	NA
G5E8R4	Ppp6r3	5	3	1	1	0	0	NA	SAPS domain family member 3 isoform CRA_c OS=Mus musculus OX=10090 GN=Ppp6r3 PE=1 SV=1
F6W2Q5	Eps15	0	0	0	1	0	0	NA	NA
S4R2U7	Celf2	2	0	0	1	1	0	NA	NA
S4R1S7	Celf2	2	1	0	1	1	0	NA	NA
A0A140T8N2	NA	0	0	0	1	0	1	NA	NA
A0A087WP78	Neurl3	0	0	0	1	0	0	NA	NA
G3X9U9	Fis1	0	0	0	1	1	0	NA	NA
A0A1L1SRL0	Sltm	0	0	0	1	0	0	NA	NA
F7B6X4	Atxn2	0	0	0	1	0	0	NA	NA
F6V8M6	Atxn2	0	0	0	1	0	0	NA	NA
F6U2C2	Atxn2	0	0	0	1	0	0	NA	NA
A0A140LJE2	Tpcn2	0	0	0	1	0	0	NA	NA
A0A140LHT5	Tpcn2	0	0	0	1	0	0	NA	NA
A0A140LJI3	Tpcn2	0	0	0	1	0	0	NA	NA
A0A140LIA1	Tpcn2	0	0	0	1	0	0	NA	NA
A0A0A6YWP6	Atp6v1h	0	2	0	1	0	0	NA	NA
A0A0A6YX18	Atp6v1h	8	0	0	1	0	6	Carbamidomethylation	NA
A0A0R4J1A0	Btla	0	0	0	1	0	2	NA	NA
E9QNY6	Btla	0	0	0	1	0	2	NA	NA
A0A0A6YW07	Impa1	0	0	0	1	0	1	NA	NA
Q80ZJ2	Impa1	0	0	0	1	0	0	NA	NA
Q924B0	Impa1	0	0	3	1	0	0	NA	Inositol-1-monophosphatase OS=Mus musculus OX=10090 GN=Impa1 PE=1 SV=1
D3Z3R3	Dtymk	0	0	0	1	1	0	NA	NA
A0A075B5M7	Igkv5-39	0	0	0	1	0	1	NA	NA
A0A0B4J1J1	Igkv5-45	0	0	0	1	0	1	NA	NA
A0A0B4J1J2	Igkv5-43	0	0	0	1	0	1	NA	NA
A0A0G2JDV4	Igkv5-39	0	0	0	1	0	1	NA	NA
A2A6T4	Mrpl58	0	0	0	1	0	0	NA	NA
A0A1Y7VMS4	Nol7	0	0	0	1	1	0	NA	NA
A2AP78	Hmgb3	0	0	0	1	0	0	NA	NA
G3UX35	Smarca4	0	0	0	1	0	0	NA	NA
A0A1Y7VKX7	Ddx24	5	5	3	1	1	1	NA	ATP-dependent RNA helicase DDX24 OS=Mus musculus OX=10090 GN=Ddx24 PE=1 SV=1
F8WJA0	Ddx24	5	5	3	1	1	1	NA	ATP-dependent RNA helicase DDX24 OS=Mus musculus OX=10090 GN=Ddx24 PE=1 SV=1
D3Z5I1	Zc3hav1	5	7	2	1	0	0	NA	Zinc finger CCCH-type antiviral protein 1 OS=Mus musculus OX=10090 GN=Zc3hav1 PE=1 SV=1
B9EJ54	Nup205	1	3	0	1	0	0	NA	NA
A0A0J9YUD5	Nup205	1	3	0	1	0	0	NA	NA
D4AFX6	Acap2	23	22	14	1	3	4	NA	Arf-GAP with coiled-coil ANK repeat and PH domain-containing protein 2 OS=Mus musculus OX=10090 GN=Acap2 PE=1 SV=1
B7ZNU9	Sntb2	0	0	0	1	0	0	NA	NA
B0R091	Chp1	0	0	0	1	0	0	NA	NA
Q6DFW5	Atp11b	0	0	0	1	0	1	Carbamidomethylation	NA
B1AWH6	Smc2	0	0	0	1	0	0	NA	NA
A0A0U1RNL9	Maz	7	4	10	1	1	2	NA	Myc-associated zinc finger protein OS=Mus musculus OX=10090 GN=Maz PE=1 SV=1
Q9Z1R9	Prss1	3	0	0	1	1	0	NA	NA
D3Z687	0610010K14Rik	1	1	0	1	0	0	NA	NA
F7A3Q3	Mark2	0	0	0	1	0	0	NA	NA
H3BKM0	Ap2b1	0	1	0	1	1	1	Carbamidomethylation	NA
A0A0R4J174	Ecsit	0	2	0	1	0	0	NA	NA
J3KMM6	Ecsit	0	2	0	1	0	0	NA	NA
A0A494BBA3	Abhd17b	0	0	0	1	0	0	NA	NA
H3BJJ9	Zc3h18	0	0	0	1	0	0	NA	NA
D3YYR4	Hk1	0	1	0	1	0	0	NA	NA
A0A1Y7VLP0	Atp5mj	0	0	0	1	0	0	NA	NA
J3QJV7	Rabep1	0	0	0	1	0	1	NA	NA
F6VNW5	Gclm	0	0	0	1	0	0	NA	NA
H3BJA3	Gclm	0	0	0	1	0	0	NA	NA
A0A1B0GSH8	Gm45808	0	0	0	1	0	0	NA	NA
E9PYI7	Lmo7	29	31	25	1	0	2	NA	LIM domain only 7 OS=Mus musculus OX=10090 GN=Lmo7 PE=1 SV=1
F6VG99	Lmo7	0	0	0	1	0	2	NA	NA
E9PYF4	Lmo7	0	0	0	1	0	0	NA	NA
G3X8U7	Ppp3cb	0	0	0	1	0	0	NA	NA
E0CZ78	Ppp3cb	0	1	0	1	0	0	NA	NA
E9Q035	NA	0	1	0	1	0	1	NA	NA
F6SGV3	Pdcd2l	0	0	0	1	1	0	NA	NA
Q05BF0	Chchd1	3	0	0	1	1	0	NA	NA
A0A140T8P9	Igkv14-111	0	0	0	1	0	2	Oxidation (M)	NA
A0A075B5K0	Igkv14-126	0	0	0	1	0	0	NA	NA
A2AJK8	Ttc1	1	2	2	1	0	0	NA	Tetratricopeptide repeat protein 1 OS=Mus musculus OX=10090 GN=Ttc1 PE=1 SV=1
Q3TIR6	Vbp1	0	0	1	1	0	0	NA	Prefoldin subunit 3 OS=Mus musculus OX=10090 GN=Vbp1 PE=1 SV=1
G3X8R5	Qrich1	0	0	0	1	0	0	NA	NA
D3Z285	Nfu1	0	0	0	1	0	0	NA	NA
A0A1Y7VN19	Dhrs7	0	0	0	1	0	0	NA	NA
A2A4P4	Gm27029	0	0	0	1	1	0	NA	NA
A2AEB8	Morf4l2	0	0	0	1	0	0	NA	NA
A2AEB7	Morf4l2	0	0	0	1	0	0	NA	NA
A2AEB6	Morf4l2	0	1	0	1	0	0	NA	NA
A2AEB5	Morf4l2	0	0	0	1	0	0	NA	NA
A2AEB4	Morf4l2	0	0	0	1	0	0	NA	NA
A2AEB3	Morf4l2	0	0	0	1	0	0	NA	NA
A0A0A0MQ73	Kmt2d	0	0	0	1	0	0	NA	NA
A0A494B9L7	Atad1	2	1	0	1	0	0	NA	NA
A0A494B9Y0	Atad1	2	1	0	1	0	1	NA	NA
A0A087WS92	Hdlbp	0	0	0	1	0	0	NA	NA
A0A087WNP6	Cdv3	0	0	0	1	1	0	NA	NA
E9PVK4	Ttc21b	0	0	0	1	0	3	NA	NA
S4R2D2	Gga3	0	0	0	1	0	1	NA	NA
A2A9W7	Gga3	0	0	0	1	0	1	NA	NA
A0A494BAM4	Rrp1b	0	0	0	1	0	0	NA	NA
Q3U4W8	Usp5	3	0	0	1	0	0	NA	NA
A0A0G2JGD5	Snx27	0	1	0	1	0	0	NA	NA
D3Z494	Akr1b10	0	0	0	1	0	0	NA	NA
G5E895	Akr1b10	0	0	0	1	0	0	NA	NA
A0A1Y7VLH1	Akr1c21	0	0	0	1	0	0	NA	NA
Q91WT7	Akr1c14	0	0	0	1	0	0	NA	NA
G3X9Y6	Akr1c19	0	0	0	1	0	0	NA	NA
D3Z3Y4	Tial1	0	2	0	1	0	0	NA	NA
Q921W2	Tial1	0	2	0	1	1	0	NA	NA
Q8CII5	Tia1	0	2	0	1	1	0	NA	NA
G5E8L2	Tia1	0	2	0	1	1	0	NA	NA
Q80ZW7	Tia1	0	2	0	1	1	0	NA	NA
A0A0N4SW78	Tia1	0	0	0	1	0	0	NA	NA
A0A0U1RPE1	Tial1	0	0	0	1	0	0	NA	NA
A0A0U1RPD3	Tial1	0	0	0	1	0	0	NA	NA
D3Z4H6	Tia1	1	0	0	1	1	0	NA	NA
A0A0R4J0F6	Gak	0	0	0	1	0	0	NA	NA
F6SLK1	Gak	0	0	0	1	0	0	NA	NA
A0A0U1RPX7	Myo7a	0	0	0	1	0	0	NA	NA
A0A0R4J113	Myo7a	0	0	0	1	0	0	NA	NA
Q5MJ56	Myo7a	0	0	0	1	0	0	NA	NA
A8Y5I3	Rad50	0	0	0	1	2	0	NA	NA
A2A817	Park7	0	0	0	1	0	0	NA	NA
A2A816	Park7	0	0	0	1	0	0	NA	NA
A0A286YCB8	Camk2g	0	0	0	1	0	0	NA	NA
A0A286YDL6	Camk2g	0	0	0	1	0	0	NA	NA
G3UY65	Ccnb1	0	0	0	1	0	3	NA	NA
G3UYP1	Rragb	0	0	0	1	1	0	NA	NA
A0A0R4J1I6	Nup210	2	0	0	1	1	0	NA	NA
J3QNN5	Sccpdh	0	0	0	1	0	1	NA	NA
F7BX26	Ppp5c	0	0	2	1	1	1	Carbamidomethylation	Serine/threonine-protein phosphatase (Fragment) OS=Mus musculus OX=10090 GN=Ppp5c PE=1 SV=1
F8WI46	Tbl2	0	0	0	1	0	0	NA	NA
A2AVR9	Dynlrb1	0	2	0	1	0	0	NA	NA
Q8BUJ6	Ttn	0	0	0	1	0	0	NA	NA
A0A0R4J1G7	Eml4	0	0	0	1	0	0	NA	NA
A7ISP9	Eml4	2	1	1	1	0	0	NA	EMAP-like protein 4 OS=Mus musculus OX=10090 GN=Eml4 PE=1 SV=1
F8WJ93	Eml4	2	1	1	1	0	0	NA	Echinoderm microtubule-associated protein-like 4 OS=Mus musculus OX=10090 GN=Eml4 PE=1 SV=1
A0A1B0GS72	Cd37	0	0	0	1	0	0	NA	NA
Q3U1W9	Cd37	0	0	0	1	0	0	NA	NA
A0A1B0GSZ7	Cd37	0	0	0	1	0	0	NA	NA
Q3U429	Cd37	0	0	0	1	0	0	NA	NA
A0A087WQ60	Cops5	0	0	0	1	0	0	NA	NA
A0A087WQA8	Cops5	0	0	0	1	0	0	NA	NA
A2BFF5	Dync1i2	0	0	6	1	0	0	NA	Cytoplasmic dynein 1 intermediate chain 2 OS=Mus musculus OX=10090 GN=Dync1i2 PE=1 SV=1
A2A4N8	Nbr1	0	0	0	1	0	2	NA	NA
A2A4N7	Nbr1	0	0	0	1	0	2	NA	NA
F6QFL0	Chchd3	0	0	0	1	0	0	NA	NA
A0A1D5RLM8	Gm11639	0	0	0	1	1	0	NA	NA
A0A1W2P7W7	Tjp3	0	0	0	1	0	0	NA	NA
Q921G9	Tjp3	0	0	2	1	0	0	NA	Tight junction protein 3 OS=Mus musculus OX=10090 GN=Tjp3 PE=1 SV=1
A0A1W2P7L7	Sf3b6	0	0	0	1	2	0	NA	NA
A2AFM5	Apex2	0	0	0	1	0	0	NA	NA
E9QQ10	Akap9	0	0	0	1	0	0	NA	NA
F6U7V1	Ryr2	0	0	0	1	1	0	NA	NA
B1AXJ4	Lrp8	0	0	0	1	0	0	NA	NA
D3Z7P4	Gls	0	0	0	1	0	0	NA	NA
E9Q1A0	Pde4dip	0	0	0	1	0	0	NA	NA
G3X9L9	Pde4dip	0	0	0	1	0	0	NA	NA
E9Q3T3	Kif14	0	0	0	1	0	0	NA	NA
F8WI56	Dip2a	0	0	0	1	0	0	NA	NA
D3Z7D3	Dip2a	0	0	0	1	0	0	NA	NA
G3UZJ4	Prdx5	0	5	0	1	0	0	NA	NA
H3BJQ7	Prdx5	8	5	0	1	0	0	NA	NA
A0A494BAZ4	Prdx5	0	0	0	1	0	0	NA	NA
A0A0A6YX96	Fpgs	0	0	0	1	0	0	NA	NA
A0A338P735	Smpd4	0	0	0	1	0	0	NA	NA
D3YU17	Ncln	0	0	0	1	0	1	NA	NA
D3Z269	Lypla1	0	0	0	1	1	0	NA	NA
E9Q2X6	Smc4	9	7	2	1	0	3	NA	Structural maintenance of chromosomes protein OS=Mus musculus OX=10090 GN=Smc4 PE=1 SV=1
A0A0A6YXY3	Smc4	0	0	0	1	0	0	NA	NA
E9QP46	Syne2	1	0	0	1	0	0	NA	NA
A0A0R4J114	Utp25	0	0	0	1	0	0	NA	NA
A0A140LJ69	Unc13b	0	0	0	1	0	1	Acetylation (Protein N-term)	NA
A0A217FL83	Ccdc85c	0	0	2	1	0	1	NA	Coiled-coil domain-containing protein 85C OS=Mus musculus OX=10090 GN=Ccdc85c PE=1 SV=1
D3Z0V2	Arhgef7	1	0	0	1	0	0	NA	NA
A0A0R4J0X8	Arhgef7	0	0	0	1	0	0	NA	NA
G5E881	Tamm41	0	0	0	1	0	0	NA	NA
E9Q919	Dctn3	0	0	0	1	0	0	NA	NA
E9PYH2	Acot7	3	3	4	1	1	2	NA	Cytosolic acyl coenzyme A thioester hydrolase OS=Mus musculus OX=10090 GN=Acot7 PE=1 SV=1
Z4YJW0	Emc1	0	0	0	1	0	0	NA	NA
G3UXT6	Kpna1	0	0	0	1	0	1	Acetylation (Protein N-term)	NA
A0A140LIV1	Spef2	0	0	0	1	0	0	NA	NA
A2AW03	P2rx3	0	0	0	1	0	0	NA	NA
A2AW04	P2rx3	0	0	0	1	0	0	NA	NA
E9PX84	Dab2	0	0	0	1	0	0	NA	NA
F6TQN9	Dab2	0	0	0	1	0	0	NA	NA
E9QL31	Dab2	0	0	0	1	0	0	NA	NA
A0A0R4J104	Dab2	0	0	0	1	0	0	NA	NA
A0A1L1SV25	Actn4	224	0	0	0	132	0	NA	NA
Q80XR6	Hnrnpab	55	47	47	0	39	19	Carbamidomethylation; Oxidation (M)	Heterogeneous nuclear ribonucleoprotein A/B OS=Mus musculus OX=10090 GN=Hnrnpab PE=1 SV=1
A0A0N4SV66	H2aj	26	19	4	0	35	8	NA	Histone H2A OS=Mus musculus OX=10090 GN=H2afj PE=1 SV=1
Q8CGP4	H2ac1	26	19	4	0	35	8	NA	Histone H2A OS=Mus musculus OX=10090 GN=Hist1h2aa PE=1 SV=1
D3YVM2	Tmem59	14	0	9	0	39	0	NA	Transmembrane protein 59 OS=Mus musculus OX=10090 GN=Tmem59 PE=1 SV=1
D3YTP0	Steap3	4	5	0	0	23	0	NA	NA
Q8K4L2	Svil	0	0	0	0	17	5	NA	NA
A0A140T8M9	Igkv1-122	0	0	0	0	21	58	Carbamidomethylation	NA
K3W4R2	Myh14	50	56	25	0	11	8	NA	Myosin-14 OS=Mus musculus OX=10090 GN=Myh14 PE=1 SV=1
B1AU76	Nasp	4	3	5	0	9	2	NA	Nuclear autoantigenic sperm protein OS=Mus musculus OX=10090 GN=Nasp PE=1 SV=1
A0A0G2JG00	Fubp1	0	0	13	0	8	0	NA	Far upstream element-binding protein 1 OS=Mus musculus OX=10090 GN=Fubp1 PE=1 SV=1
Q5SWU0	Ikzf1	0	0	0	0	5	5	NA	NA
E9PX68	Slc4a1ap	56	52	54	0	13	16	Carbamidomethylation; Oxidation (M)	Solute carrier family 4 (anion exchanger) member 1 adaptor protein OS=Mus musculus OX=10090 GN=Slc4a1ap PE=1 SV=1
A0A0A6YX26	Rpl31	0	0	4	0	7	4	NA	60S ribosomal protein L31 OS=Mus musculus OX=10090 GN=Rpl31 PE=1 SV=1
Q3THM8	Emd	0	0	0	0	2	0	NA	NA
I7HJS1	Emd	5	0	0	0	2	0	NA	NA
B7FAU5	Emd	0	0	0	0	2	0	NA	NA
A0A338P776	Atp5po	0	0	2	0	5	0	NA	ATP synthase H+-transporting mitochondrial F1 complex O subunit (Fragment) OS=Mus musculus OX=10090 GN=Atp5o PE=1 SV=1
A0A494BAY0	Vps37c	0	0	0	0	3	1	NA	NA
A0A494BAR3	Vps37c	0	0	0	0	3	1	NA	NA
Q6XLQ8	Calu	3	3	0	0	4	0	NA	NA
Q3ULB0	Rbm6	0	0	0	0	5	4	NA	NA
F6YFR7	Cope	0	0	0	0	2	0	NA	NA
A0A1L1SVD8	Cwc15	0	0	0	0	3	0	NA	NA
E0CZE1	Arrdc3	0	0	0	0	2	0	NA	NA
F6WMY5	Adgrl3	0	0	0	0	3	0	NA	NA
D3Z5B1	Zbed5	0	1	0	0	3	0	NA	NA
H3BKF6	Cux1	1	0	0	0	2	0	NA	NA
Q5SQG5	Phb1	0	0	0	0	2	0	NA	NA
Q6P5B5	Fxr2	23	21	22	0	3	0	NA	Fragile X mental retardation syndrome-related protein 2 OS=Mus musculus OX=10090 GN=Fxr2 PE=1 SV=1
A0A023T778	Magohb	12	4	0	0	3	0	NA	NA
S4R1Y5	Rpf2	0	0	0	0	3	1	NA	NA
D3Z7Q5	Pdcd5	0	0	0	0	3	0	NA	NA
A0A0G2JF13	Crlf2	0	0	0	0	2	3	NA	NA
D3Z0B9	Aldh16a1	0	3	3	0	2	3	NA	Aldehyde dehydrogenase family 16 member A1 OS=Mus musculus OX=10090 GN=Aldh16a1 PE=1 SV=3
Q6PFA2	Clta	9	12	3	0	1	0	NA	Clathrin light chain OS=Mus musculus OX=10090 GN=Clta PE=1 SV=1
A0A1D5RM85	Rpl18a	0	0	0	0	2	4	Carbamidomethylation	NA
A0A1D5RME4	Rpl18a	0	0	0	0	2	0	NA	NA
A0A1L1SRT0	NA	0	0	1	0	2	0	NA	BAG family molecular chaperone regulator 1 OS=Mus musculus OX=10090 GN=Bag1 PE=1 SV=1
G5E8T3	Srp19	0	0	0	0	1	0	NA	NA
Q9D104	Srp19	0	0	0	0	1	0	NA	NA
A0A338P786	Ube2l3	0	0	0	0	2	0	NA	NA
D3Z191	Tmem106b	0	0	0	0	2	5	Carbamidomethylation	NA
E9Q4G7	Csnk1a1	3	2	1	0	1	5	NA	Casein kinase I isoform alpha OS=Mus musculus OX=10090 GN=Csnk1a1 PE=1 SV=1
E9Q3W1	Csnk1a1	3	0	0	0	1	5	NA	NA
E9PWB2	Csnk1a1	3	2	0	0	1	5	NA	NA
F6YBC9	Csnk1a1	0	0	0	0	1	0	NA	NA
A0A0G2JGX3	Atp5pb	0	0	0	0	2	0	NA	NA
Q3TPM3	Cul1	0	12	0	0	2	7	Oxidation (M)	NA
A0A0G2JEC4	Sh3glb1	0	0	0	0	2	0	NA	NA
G3UY43	Dnmt3a	0	1	0	0	1	0	NA	NA
A0A140LHC3	Qars1	0	0	0	0	2	0	NA	NA
A0A1W2P7R1	Nup107	3	2	0	0	1	0	NA	NA
E9Q5H2	Anp32e	0	0	0	0	1	0	NA	NA
E9PZF5	Anp32e	0	0	0	0	1	0	NA	NA
Q8BNQ4	Sp2	0	0	0	0	1	1	NA	NA
Q8CE80	Cast	0	0	0	0	1	0	NA	NA
A0A3Q4EHN7	Wdr43	2	0	0	0	3	0	NA	NA
A2A4N5	Nbr1	0	0	0	0	2	2	NA	NA
D3Z0L4	Chchd3	0	0	0	0	3	0	NA	NA
D3Z2E8	Calhm2	0	0	0	0	2	1	NA	NA
F6SQH7	Poldip2	5	0	7	0	1	3	NA	Polymerase delta-interacting protein 2 (Fragment) OS=Mus musculus OX=10090 GN=Poldip2 PE=1 SV=1
A2A7S7	Yars1	1	1	0	0	2	0	NA	NA
Q14B01	Rnf113a2	7	6	10	0	1	0	NA	Ring finger protein 113A2 OS=Mus musculus OX=10090 GN=Rnf113a2 PE=1 SV=1
Q8R3P8	Rnf113a1	0	0	0	0	1	0	NA	NA
F2Z490	Dgke	3	1	0	0	1	2	NA	NA
A0A2I3BS49	Timm23	0	0	0	0	1	0	NA	NA
Q9CXU4	Timm23	0	0	0	0	1	0	NA	NA
Q3UID0	Smarcc2	14	12	0	0	1	0	NA	NA
E9Q9B3	Spryd3	0	0	0	0	1	1	NA	NA
S4R1V0	Pdlim1	0	0	0	0	2	0	NA	NA
E9PY26	Blmh	0	0	2	0	2	0	NA	Bleomycin hydrolase (Fragment) OS=Mus musculus OX=10090 GN=Blmh PE=1 SV=1
A0A2I3BQE0	Stk3	0	0	0	0	1	1	NA	NA
F7DAY5	Rprd1b	0	0	0	0	1	0	NA	NA
A0A2R8W6R3	Rbx1	0	0	0	0	3	0	NA	NA
A2AUM6	Srp14	0	0	0	0	1	0	NA	NA
A0A2R8VHR6	Krt80	0	0	0	0	1	0	NA	NA
Q3TBQ1	Krt80	0	0	0	0	1	0	NA	NA
Q91XW9	Pcdhgc5	0	0	0	0	2	3	NA	NA
H9H9R6	Ryk	0	0	0	0	1	0	NA	NA
Z4YLT8	Rnf11	0	0	0	0	1	0	NA	NA
A0A0R4J0B2	Plbd1	0	0	1	0	1	1	NA	Phospholipase B-like OS=Mus musculus OX=10090 GN=Plbd1 PE=1 SV=1
A0A0A6YY08	Qars1	0	0	0	0	3	0	NA	NA
A0A0R4IZX6	Ap1m2	0	0	0	0	1	0	NA	NA
A0A0R4J1L4	Ap1m2	0	0	0	0	1	0	NA	NA
A0A1L1SUA0	Ap1m2	0	0	0	0	1	0	NA	NA
Q58EV3	Mup7	2	3	1	0	1	0	NA	Major urinary protein 1 OS=Mus musculus OX=10090 GN=Mup7 PE=2 SV=1
Z4YLD0	Steep1	0	0	0	0	1	0	NA	NA
D6RE20	Selenoi	0	0	0	0	1	0	NA	NA
Q8CET7	Selenoi	0	0	0	0	1	0	NA	NA
G3UVV4	Hk1	1	1	0	0	1	0	NA	NA
M0QWS4	Ufc1	0	0	0	0	1	0	NA	NA
A9C437	Clcn2	0	0	0	0	1	0	NA	NA
A0A338P673	Clcn2	0	0	0	0	1	2	Acetylation (Protein N-term); Oxidation (M)	NA
E0CYU9	Znrd2	0	0	0	0	1	0	NA	NA
A0A0A6YVU0	Atp6v1h	0	0	0	0	1	0	NA	NA
F6XC15	Flna	0	0	0	0	1	0	NA	NA
D3YW98	Vps29	0	0	0	0	2	0	NA	NA
D3YYD5	Vps29	0	0	0	0	2	0	NA	NA
D3Z645	Vps29	0	0	0	0	2	0	NA	NA
A0A0A6YXI9	Zc3h11a	0	0	0	0	1	0	NA	NA
F6YZZ8	Lrp8	0	0	0	0	1	0	NA	NA
B1AXJ6	Lrp8	0	0	0	0	1	0	NA	NA
D3Z5N6	Dpf2	3	2	0	0	1	0	NA	NA
F8WIP7	Dpf2	3	2	0	0	1	0	NA	NA
A0A494BBF7	Dpf2	3	2	0	0	1	0	NA	NA
E9QKK1	Cenpe	0	0	0	0	1	0	NA	NA
A2AWN8	Ythdf1	0	0	0	0	1	0	NA	NA
Q6P1J1	Crmp1	0	0	0	0	1	0	NA	NA
Q3TT92	Dpysl3	0	0	0	0	1	0	NA	NA
A2AQE4	Cops2	0	0	0	0	1	0	NA	NA
E9QA47	Celf2	2	0	0	0	1	0	NA	NA
S4R2J2	Celf2	2	0	0	0	1	0	NA	NA
S4R2L5	Celf2	2	0	0	0	1	0	NA	NA
A3KGT0	Celf2	2	0	0	0	1	0	NA	NA
A0A0R4J2B0	Celf2	2	0	0	0	1	0	NA	NA
V9GX43	Celf2	2	0	0	0	1	0	NA	NA
S4R2U1	Celf2	0	0	0	0	1	0	NA	NA
E9Q6W2	Coa3	0	0	0	0	1	0	NA	NA
A0A1L1SRR1	Cmtm7	0	0	0	0	1	0	NA	NA
F6U415	Smarcb1	0	0	0	0	1	0	NA	NA
D3YXD3	Prkrip1	0	0	0	0	1	0	NA	NA
G5E837	Hcfc2	0	0	0	0	1	0	NA	NA
E9PY85	Rsl24d1	0	0	0	0	1	0	NA	NA
Q5U4H9	Ncoa4	0	0	0	0	1	1	NA	NA
Q8BHX6	Noc2l	2	0	0	0	1	1	NA	NA
J3QK52	Noc2l	2	0	1	0	1	1	NA	Nucleolar complex protein 2 homolog OS=Mus musculus OX=10090 GN=Noc2l PE=1 SV=1
Q5FWJ7	Vti1a	0	0	0	0	2	0	NA	NA
D3YY55	Sap18	0	0	0	0	2	0	NA	NA
A0A0G2JGP4	Nras	1	0	0	0	1	0	NA	NA
Q9D091	Nras	1	0	0	0	1	0	NA	NA
A0A0G2JE25	Nras	1	0	0	0	1	0	NA	NA
A0A3B2WB12	Mea1	0	0	0	0	1	0	NA	NA
F7CVW0	Sbno1	0	1	0	0	1	0	NA	NA
B2RRI2	Sbno1	0	1	0	0	1	0	NA	NA
F7CG42	Pus7	0	2	0	0	1	0	NA	NA
A0A1Y7VLY3	Cpsf3	0	0	0	0	1	0	NA	NA
G3UW94	U2af1	0	0	0	0	1	0	NA	NA
A0A0G2JED9	Rap1a	0	0	0	0	1	0	NA	NA
A0A0N4SVR8	Tia1	0	0	0	0	1	0	NA	NA
A0A0N4SUX1	Tia1	0	0	0	0	1	0	NA	NA
D6RGU1	Tial1	0	0	0	0	1	0	NA	NA
D3YY02	Tia1	0	0	0	0	1	0	NA	NA
D6RFA7	Carm1	0	0	0	0	1	0	NA	NA
A0A494B970	Glo1	0	0	0	0	1	0	NA	NA
A0A494BAF7	Glo1	0	0	0	0	1	0	NA	NA
A0A494BBE7	Glo1	0	0	0	0	1	0	NA	NA
F7BEQ1	Slc45a4	0	0	0	0	1	8	Oxidation (M)	NA
A2AJH3	Nmt2	0	0	0	0	1	0	NA	NA
H3BKZ0	Zwilch	0	0	0	0	1	0	NA	NA
H3BJ52	Zwilch	0	4	0	0	1	0	NA	NA
G3X9Z0	Zwilch	0	4	0	0	1	0	NA	NA
D3YUG4	Lypla1	0	0	0	0	1	0	NA	NA
J3QP56	Lypla1	0	0	0	0	1	0	NA	NA
D3Z111	Lypla1	0	0	0	0	1	0	NA	NA
D3YTP4	Scamp1	0	0	0	0	1	0	NA	NA
D3Z2B4	Xpr1	0	0	0	0	1	2	NA	NA
Q3UTY5	Rpgr	0	0	0	0	1	0	NA	NA
E9QNZ2	Dzip3	1	0	0	0	1	0	NA	NA
Q9QUK9	Try5	0	0	0	0	1	0	NA	NA
Q9R0T7	Try4	0	0	0	0	1	0	NA	NA
E9Q175	Myo6	10	7	3	0	1	0	NA	Unconventional myosin-VI OS=Mus musculus OX=10090 GN=Myo6 PE=1 SV=1
E9PVU0	Myo6	10	7	3	0	1	0	NA	Unconventional myosin-VI OS=Mus musculus OX=10090 GN=Myo6 PE=1 SV=1
E9Q3L1	Myo6	0	0	0	0	1	0	NA	NA
E9Q174	Myo6	0	0	0	0	1	0	NA	NA
V9GXM4	Myo6	0	0	0	0	1	0	NA	NA
V9GX76	Myo6	0	0	0	0	1	0	NA	NA
A0A171EBL2	Rnf213	0	0	0	0	1	0	NA	NA
A0A0B4J1I4	Igkv4-72	0	0	0	0	1	0	NA	NA
A0A1Y7VJP1	Ryr2	0	0	0	0	1	0	NA	NA
R4GML3	Cntrl	0	2	0	0	2	0	NA	NA
E9Q9E7	Cntrl	0	2	0	0	2	0	NA	NA
A0A140LJ72	Muc16	0	0	0	0	1	1	NA	NA
F8WGL9	Cdv3	0	0	0	0	1	0	NA	NA
A0A087WRM0	Cdv3	0	0	0	0	1	0	NA	NA
A2ANY8	Ankrd6	0	0	0	0	1	0	NA	NA
E9PX79	Marchf10	0	0	0	0	1	1	NA	NA
Q91Y09	Pcdhac2	0	0	0	0	1	0	NA	NA
F6Y3V0	Ptprf	0	0	0	0	1	0	NA	NA
F6S1X8	Ptprf	0	0	0	0	1	0	NA	NA
F6XLV1	Crocc2	0	0	0	0	1	0	NA	NA
Q5SV55	Pard3b	0	0	0	0	1	0	NA	NA
Q5SV54	Pard3b	0	0	0	0	1	0	NA	NA
Q543V3	Irs1	0	0	0	0	1	0	NA	NA
E9PUN6	Adamts9	0	0	0	0	1	0	NA	NA
E9Q6P9	Cacna1h	0	0	0	0	1	0	NA	NA
F6USE5	Cacna1h	0	0	0	0	1	0	NA	NA
Q3V0Z2	Gmcl1	0	0	0	0	1	0	NA	NA
A0A338P695	Smpd4	0	0	0	0	1	0	NA	NA
A0A0U1RNL1	Maz	7	4	10	0	1	2	NA	Myc-associated zinc finger protein OS=Mus musculus OX=10090 GN=Maz PE=1 SV=1
F8VPK3	Maz	7	4	10	0	1	2	NA	Myc-associated zinc finger protein OS=Mus musculus OX=10090 GN=Maz PE=1 SV=1
B9EIX2	Cep170b	0	0	0	0	1	0	NA	NA
G3X9H5	Htt	1	0	1	0	1	1	NA	Huntingtin OS=Mus musculus OX=10090 GN=Htt PE=1 SV=1
E9QAH1	Golgb1	2	1	0	0	1	0	NA	NA
E9PVZ8	Golgb1	2	1	0	0	1	0	NA	NA
D3Z1A6	Cidec	0	0	0	0	1	0	NA	NA
B1AYM9	CK137956	0	0	0	0	1	0	NA	NA
A0A0B4J1M0	Ighv1-77	0	0	0	0	1	0	NA	NA
A0A075B5V8	Ighv1-47	0	0	0	0	1	2	Carbamidomethylation; Acetylation (Protein N-term)	NA
A0A075B680	Ighv1-62-2	0	0	0	0	1	0	NA	NA
A0A1B0GSI7	Col4a1	0	0	0	0	1	0	NA	NA
E9Q7Q7	Rhpn1	0	0	0	0	1	0	NA	NA
E9PXY1	Cul4b	0	0	0	0	1	0	NA	NA
J3QJX0	Cul4b	0	0	0	0	1	0	NA	NA
F8WJA7	Aff3	0	1	1	0	1	1	Carbamidomethylation	AF4/FMR2 family member 3 OS=Mus musculus OX=10090 GN=Aff3 PE=1 SV=1
D3YYI6	Aff3	0	1	1	0	1	1	Carbamidomethylation	AF4/FMR2 family member 3 OS=Mus musculus OX=10090 GN=Aff3 PE=1 SV=1
E9QNY8	Sacs	0	0	0	0	1	0	NA	NA
A0A075B5K8	Igkv1-99	0	0	0	0	0	170	NA	NA
F6XWB2	Igkv1-99	0	0	0	0	0	170	NA	NA
A0A0A6YW89	Pfkfb3	326	0	0	0	0	159	Carbamidomethylation; Oxidation (M)	NA
A0A075B5N0	Igkv1-35	0	0	0	0	0	72	NA	NA
A0A0G2JDE5	Igkv1-35	0	0	0	0	0	72	NA	NA
E9Q5F6	Ubc	0	0	0	0	0	99	NA	NA
Q5SX22	Ubb	0	0	0	0	0	99	NA	NA
E9QNP0	Kxd1	79	0	0	0	0	99	NA	NA
A0A0A6YW67	Gm8797	0	0	0	0	0	99	NA	NA
E9Q9J0	Uba52	0	0	0	0	0	99	NA	NA
E9Q4P0	Kxd1	0	0	0	0	0	99	NA	NA
A0A1B0GSX0	Ldha	0	0	0	0	0	32	Carbamidomethylation; Oxidation (M)	NA
E9Q0F0	Krt78	0	0	0	0	0	51	NA	NA
A0A1L1SUX8	Thy1	14	13	9	0	0	21	Carbamidomethylation	Thy-1 membrane glycoprotein (Fragment) OS=Mus musculus OX=10090 GN=Thy1 PE=1 SV=1
G3UZ48	Syncrip	0	0	0	0	0	15	Carbamidomethylation	NA
A0A1B0GRR3	Rps11	0	0	0	0	0	15	Carbamidomethylation	NA
A0A0B4J1H7	Igkv1-135	0	0	0	0	0	14	NA	NA
A0A0B4J1H8	Igkv1-133	0	0	0	0	0	14	NA	NA
Q8CBB6	H2bc23	33	29	0	0	0	13	Oxidation (M)	NA
F7B5B5	Hnrnpr	0	0	0	0	0	8	Carbamidomethylation	NA
F8WHM5	Glg1	4	4	3	0	0	3	Carbamidomethylation	Golgi apparatus protein 1 (Fragment) OS=Mus musculus OX=10090 GN=Glg1 PE=1 SV=1
Q8BQ10	Hdac2	0	0	0	0	0	9	Oxidation (M)	NA
A0A0N4SUX5	Eno2	0	0	0	0	0	5	NA	NA
D3Z6E4	Eno2	0	0	0	0	0	5	NA	NA
G3X8Y3	Naa15	8	4	17	0	0	7	NA	N-alpha-acetyltransferase 15 NatA auxiliary subunit OS=Mus musculus OX=10090 GN=Naa15 PE=1 SV=1
Q3V4D5	Naa10	0	0	4	0	0	3	NA	N-acetyltransferase ARD1 homolog (S. cerevisiae) isoform CRA_b OS=Mus musculus OX=10090 GN=Naa10 PE=1 SV=1
A0A0R4J031	Trim35	0	7	50	0	0	5	Carbamidomethylation	Tripartite motif-containing 35 OS=Mus musculus OX=10090 GN=Trim35 PE=1 SV=1
A0A0B4J1I9	Igkv4-55	0	0	0	0	0	3	NA	NA
A0A140T8P6	Igkv12-46	0	0	0	0	0	3	NA	NA
D3Z6W5	Tmem9b	0	0	0	0	0	8	NA	NA
A0A494B9A7	Cfl1	0	0	0	0	0	5	Carbamidomethylation; Acetylation (Protein N-term)	NA
A2BDX2	Dpm1	3	1	0	0	0	3	NA	NA
A0A494B945	Rab1b	6	5	4	0	0	6	NA	Ras-related protein Rab-1B (Fragment) OS=Mus musculus OX=10090 GN=Rab1b PE=1 SV=1
A0A0U1RNN5	Spn	0	0	0	0	0	3	NA	NA
A0A2I3BPX3	Ano6	0	0	0	0	0	3	Carbamidomethylation	NA
A0A1W2P7A1	Rps12	0	0	7	0	0	6	Carbamidomethylation	40S ribosomal protein S12 OS=Mus musculus OX=10090 GN=Rps12 PE=1 SV=1
A2ATU9	Hat1	0	0	0	0	0	4	Oxidation (M)	NA
D3YWH4	Tm9sf1	0	0	0	0	0	4	Carbamidomethylation	NA
D3Z6X7	Tm9sf1	0	0	0	0	0	4	Carbamidomethylation	NA
A0A1D5RMA4	Slc7a6	0	0	0	0	0	3	Acetylation (Protein N-term); Oxidation (M)	NA
A0A1D5RMI7	Slc7a6	0	0	0	0	0	3	Acetylation (Protein N-term); Oxidation (M)	NA
A0A1D5RM43	Slc7a6	0	0	0	0	0	3	Acetylation (Protein N-term); Oxidation (M)	NA
A0A494BB75	Wdr26	10	7	14	0	0	3	NA	WD repeat-containing protein 26 OS=Mus musculus OX=10090 GN=Wdr26 PE=1 SV=1
A0A1W2P6G5	Myl6	154	136	0	0	0	4	Carbamidomethylation; Oxidation (M)	NA
Q544E8	Rab37	0	0	0	0	0	5	NA	NA
A0A1B0GT66	Gm49369	5	2	0	0	0	7	Carbamidomethylation; Oxidation (M)	NA
F6Y6L6	Gm49369	5	0	0	0	0	7	Carbamidomethylation; Oxidation (M)	NA
D3Z2D8	Tmem63b	0	0	0	0	0	5	NA	NA
A0A1B0GSU0	Aldh16a1	0	3	3	0	0	3	NA	Aldehyde dehydrogenase family 16 member A1 OS=Mus musculus OX=10090 GN=Aldh16a1 PE=1 SV=1
Q8C4U8	Edil3	0	0	0	0	0	5	NA	NA
Q8C8K0	Edil3	0	0	0	0	0	5	NA	NA
D3Z131	NA	0	11	0	0	0	3	NA	NA
D3Z132	Thoc6	0	0	0	0	0	3	NA	NA
E9PW20	Chtop	12	8	11	0	0	2	NA	Chromatin target of PRMT1 protein OS=Mus musculus OX=10090 GN=Chtop PE=1 SV=1
A0A0R4IZY0	Thop1	0	0	6	0	0	6	NA	Thimet oligopeptidase OS=Mus musculus OX=10090 GN=Thop1 PE=1 SV=1
A0A286YDI8	Sec24c	0	0	0	0	0	5	NA	NA
G3X972	Sec24c	0	0	0	0	0	5	NA	NA
E9PV22	Lrrc47	0	0	3	0	0	2	NA	Leucine-rich repeat-containing protein 47 OS=Mus musculus OX=10090 GN=Lrrc47 PE=1 SV=1
A2AAP0	Rnf157	0	0	0	0	0	3	Carbamidomethylation	NA
A2AAN9	Rnf157	0	0	0	0	0	3	Carbamidomethylation	NA
A0A0N4SUL6	Emg1	0	0	0	0	0	3	Acetylation (Protein N-term)	NA
F8VQC9	Slc4a7	0	0	0	0	0	3	Oxidation (M)	NA
E9Q1D5	Tgfb1i1	0	0	3	0	0	3	Oxidation (M)	Transforming growth factor beta-1-induced transcript 1 protein OS=Mus musculus OX=10090 GN=Tgfb1i1 PE=1 SV=1
E9Q6R3	Sec22b	0	0	0	0	0	2	NA	NA
F6R7E8	Gm2663	0	3	0	0	0	5	NA	NA
Q9CPN7	1810009J06Rik	0	3	0	0	0	5	NA	NA
E9QMK9	Dglucy	0	0	4	0	0	2	NA	D-glutamate cyclase mitochondrial OS=Mus musculus OX=10090 GN=Dglucy PE=1 SV=1
J3QNW0	Dnmt1	0	0	4	0	0	3	NA	DNA (cytosine-5)-methyltransferase OS=Mus musculus OX=10090 GN=Dnmt1 PE=1 SV=1
A0A494BB89	Nars1	0	0	0	0	0	2	NA	NA
D3YV69	Rab6a	0	0	0	0	0	4	NA	NA
Q3TJ22	Aamp	1	0	0	0	0	2	Carbamidomethylation	NA
J3QN89	Aamp	1	0	0	0	0	2	Carbamidomethylation	NA
E9Q2L7	Rnf19b	0	0	0	0	0	3	Carbamidomethylation	NA
B2KG08	Rnf19b	0	0	0	0	0	3	Carbamidomethylation	NA
A0A0R4J036	Nefm	0	0	0	0	0	4	NA	NA
E9PYF1	Rnpep	0	0	0	0	0	2	Acetylation (Protein N-term)	NA
A0A0A6YXL3	Rpl31	0	0	0	0	0	4	NA	NA
F6TZU3	Gan	0	0	0	0	0	2	Acetylation (Protein N-term)	NA
D3Z1U9	Ndufv1	0	0	0	0	0	3	Carbamidomethylation	NA
D3YUM1	Ndufv1	10	4	6	0	0	3	Carbamidomethylation	NADH dehydrogenase [ubiquinone] flavoprotein 1 mitochondrial OS=Mus musculus OX=10090 GN=Ndufv1 PE=1 SV=1
A0A0G2JDY4	Acad9	0	1	0	0	0	2	NA	NA
D6REF7	Sgpl1	0	0	0	0	0	2	NA	NA
F8WIJ0	Slc12a4	0	0	0	0	0	2	NA	NA
F8WGG3	Myg1	0	0	0	0	0	3	NA	NA
A0A494BB21	Ptprcap	0	0	0	0	0	3	Carbamidomethylation	NA
G3UZ26	Shmt1	3	1	3	0	0	4	Acetylation (Protein N-term)	Serine hydroxymethyltransferase (Fragment) OS=Mus musculus OX=10090 GN=Shmt1 PE=1 SV=1
D3YZ06	Hspb1	8	0	0	0	0	2	NA	NA
Q3TSA8	Scamp1	0	0	0	0	0	2	NA	NA
E9Q1W0	Camk2d	10	8	9	0	0	3	NA	Calcium/calmodulin-dependent protein kinase type II subunit delta OS=Mus musculus OX=10090 GN=Camk2d PE=1 SV=2
A0A0G2JGS4	Camk2d	10	8	9	0	0	3	NA	Calcium/calmodulin-dependent protein kinase type II subunit delta OS=Mus musculus OX=10090 GN=Camk2d PE=1 SV=1
E9Q1T1	Camk2d	10	8	9	0	0	3	NA	Calcium/calmodulin-dependent protein kinase type II subunit delta OS=Mus musculus OX=10090 GN=Camk2d PE=1 SV=1
A0A494BAW7	Ik	0	0	0	0	0	2	NA	NA
F6WYM0	Septin2	0	0	0	0	0	2	NA	NA
D3YYB1	Septin2	0	0	0	0	0	2	NA	NA
D3Z3C0	Septin2	0	0	0	0	0	2	NA	NA
A0A1B0GRX1	Casp3	0	0	2	0	0	3	Acetylation (Protein N-term)	Caspase-3 OS=Mus musculus OX=10090 GN=Casp3 PE=1 SV=1
H7BX33	4933434E20Rik	0	0	0	0	0	2	NA	NA
A0A3B2W7H4	Anks1	0	0	0	0	0	2	NA	NA
A0A3B2WAQ7	Anks1	17	11	7	0	0	2	NA	Ankyrin repeat and SAM domain containing 1 OS=Mus musculus OX=10090 GN=Anks1 PE=1 SV=1
Q3UHP6	Anks1	17	11	7	0	0	2	NA	Ankyrin repeat and SAM domain containing 1 OS=Mus musculus OX=10090 GN=Anks1 PE=1 SV=1
A2AI57	Trpm7	0	0	0	0	0	2	NA	NA
H3BJ37	Comtd1	0	0	0	0	0	3	Carbamidomethylation	NA
H3BJH5	Cers5	0	0	0	0	0	2	NA	NA
H3BJ49	Cers5	0	0	0	0	0	2	NA	NA
H3BJQ0	Cers5	0	0	0	0	0	2	NA	NA
Q05BC8	Nbr1	0	0	0	0	0	2	NA	NA
K3W4P1	Nbr1	0	0	0	0	0	2	NA	NA
A0A2R8VHH0	Rac2	0	0	0	0	0	2	NA	NA
A0A2I3BPI4	Khnyn	0	0	0	0	0	2	NA	NA
E9Q0G1	Denr	0	0	0	0	0	3	Carbamidomethylation; Acetylation (Protein N-term)	NA
D3Z6N3	Mcm7	0	0	0	0	0	3	Acetylation (Protein N-term)	NA
A0A494BBB0	NA	0	0	0	0	0	2	NA	NA
F6VR84	Poldip3	0	0	0	0	0	1	NA	NA
A0A0A6YVU1	Nudt5	0	0	0	0	0	1	NA	NA
A2ATT5	Nudt5	0	0	0	0	0	1	NA	NA
A0A0A0MQ68	Gcdh	0	0	5	0	0	2	NA	Glutaryl-CoA dehydrogenase mitochondrial OS=Mus musculus OX=10090 GN=Gcdh PE=1 SV=1
A0A3Q4EGR2	Rock1	0	0	0	0	0	3	NA	NA
Q5SVG5	Ap1b1	0	0	0	0	0	3	Carbamidomethylation	NA
Q5SVG4	Ap1b1	0	0	0	0	0	3	Carbamidomethylation	NA
Q6GT24	Prdx6	3	0	1	0	0	3	Carbamidomethylation	Peroxiredoxin-6 OS=Mus musculus OX=10090 GN=Prdx6 PE=1 SV=1
Q8C253	Lgals3	2	0	0	0	0	2	NA	NA
A2A880	Snx11	0	0	0	0	0	1	NA	NA
K3W4T3	Atp6v0a1	0	0	0	0	0	2	NA	NA
G5E8Z3	Kplce	0	0	0	0	0	2	Carbamidomethylation	NA
E9Q9Q9	Adgrl1	0	0	0	0	0	1	NA	NA
E9Q3V9	Adgrl1	0	0	0	0	0	1	NA	NA
H7BX15	Adgrl1	0	0	0	0	0	1	NA	NA
F6YP92	Adgrl1	0	0	0	0	0	1	NA	NA
Q99L59	Xlr3a	0	0	0	0	0	2	NA	NA
Q6PGJ8	H13	0	0	0	0	0	1	NA	NA
A3KGR9	H13	0	0	0	0	0	1	NA	NA
A0A075B5N3	Igkv8-28	0	0	0	0	0	2	NA	NA
A0A0G2JE47	Igkv8-28	0	0	0	0	0	2	NA	NA
A2BHN6	Fbxo3	0	1	2	0	0	1	NA	F-box only protein 3 OS=Mus musculus OX=10090 GN=Fbxo3 PE=1 SV=1
A0A140T8M5	Igkv6-15	0	0	0	0	0	2	NA	NA
A0A286YDU2	Atxn2	7	0	0	0	0	1	NA	NA
A2AUE1	Dnajc5	0	0	0	0	0	2	NA	NA
G5E8T0	Dnajc5	0	0	0	0	0	2	NA	NA
D3Z6U8	Fmr1	0	0	0	0	0	1	NA	NA
E9QNF5	Fmr1	0	0	0	0	0	1	NA	NA
A0A286YDT6	Btrc	4	1	0	0	0	2	NA	NA
G3X9Y1	Syt3	0	0	0	0	0	1	NA	NA
Q8CBB7	Ap1g1	0	0	0	0	0	1	NA	NA
Q542I8	Itgb2	2	0	0	0	0	1	Carbamidomethylation	NA
Q5I0W6	Tmt1a2	0	0	0	0	0	1	NA	NA
D6RCX5	Mtfr1l	0	0	0	0	0	1	NA	NA
D3Z0X8	Mtfr1l	0	0	0	0	0	1	NA	NA
D3YW54	Mtfr1l	0	0	0	0	0	1	NA	NA
A0A2R8VI72	Gga1	0	0	0	0	0	1	NA	NA
D3YZE2	Mcoln3	0	0	0	0	0	1	Carbamidomethylation; Acetylation (Protein N-term)	NA
F7ALS6	Got1	0	0	0	0	0	2	NA	NA
A0A140T8N9	Igkv6-32	0	0	0	0	0	2	NA	NA
B1AWE1	Clta	9	12	3	0	0	1	NA	Clathrin light chain OS=Mus musculus OX=10090 GN=Clta PE=1 SV=1
F6WLY0	Irag2	0	0	0	0	0	2	NA	NA
G5E880	Irag2	0	0	0	0	0	2	NA	NA
F8VQG4	H2-T24	0	0	0	0	0	1	NA	NA
H3BJ70	Ago1	0	0	0	0	0	1	NA	NA
Q8BG78	Xkr5	0	0	0	0	0	1	NA	NA
G3UX07	Dnmt3a	0	1	1	0	0	1	NA	DNA (cytosine-5)-methyltransferase 3A (Fragment) OS=Mus musculus OX=10090 GN=Dnmt3a PE=1 SV=1
G3UXY2	Dnmt3a	0	1	0	0	0	1	NA	NA
B7ZCB8	Stx16	0	0	0	0	0	1	NA	NA
F7CJY7	Stx16	0	0	0	0	0	1	NA	NA
F6X4N5	Stx16	0	0	0	0	0	1	NA	NA
A0A494BAV5	Scd2	0	0	0	0	0	1	NA	NA
E9QP59	Lemd3	0	0	0	0	0	1	NA	NA
D3YU56	Lemd3	0	0	0	0	0	1	NA	NA
A0A1I7Q4A1	Cdkn2aip	1	0	0	0	0	1	Acetylation (Protein N-term)	NA
A0A286YCB2	Ubr2	0	0	0	0	0	1	Carbamidomethylation	NA
D6RCI7	Mrto4	0	0	0	0	0	1	NA	NA
A0A0G2JEJ0	Pdlim5	0	0	1	0	0	1	NA	PDZ and LIM domain protein 5 (Fragment) OS=Mus musculus OX=10090 GN=Pdlim5 PE=1 SV=1
D9J2Z9	Pdlim5	0	0	1	0	0	1	NA	ENH isoform 1b OS=Mus musculus OX=10090 GN=Pdlim5 PE=1 SV=1
D9J300	Pdlim5	0	0	1	0	0	1	NA	ENH isoform 1c OS=Mus musculus OX=10090 GN=Pdlim5 PE=1 SV=1
D9J301	Pdlim5	0	0	1	0	0	1	NA	ENH isoform 1d OS=Mus musculus OX=10090 GN=Pdlim5 PE=1 SV=1
D3Z7U0	Anxa11	0	0	0	0	0	1	NA	NA
E9QAQ3	Arhgap26	0	0	0	0	0	1	NA	NA
A0A1W2P7G2	Sarnp	0	0	0	0	0	1	NA	NA
A0A1W2P6N2	Sarnp	0	0	0	0	0	1	NA	NA
F8WGJ7	Srpk1	0	0	0	0	0	1	NA	NA
A0A3B2W430	Srpk1	0	0	0	0	0	1	NA	NA
A0A3B2W4B9	Srpk1	0	0	0	0	0	1	NA	NA
A0A3B2W883	Srpk1	0	0	0	0	0	1	NA	NA
G3UZZ3	Dnm2	4	1	0	0	0	1	NA	NA
Q3T9X3	Dnm2	4	1	0	0	0	1	NA	NA
D3Z3F4	Mtx1	0	0	0	0	0	1	NA	NA
I1E4X1	Stx5a	0	0	0	0	0	1	NA	NA
E9QPZ3	Flg2	0	0	0	0	0	2	Oxidation (M)	NA
E9Q6Q4	Rap1gds1	0	0	0	0	0	1	NA	NA
A0A087WQC4	Taf6l	0	0	0	0	0	1	NA	NA
H3BJR2	Taf6l	0	0	0	0	0	1	NA	NA
A2ASM0	Lnpk	0	0	0	0	0	1	NA	NA
A0A0G2JGD2	S100a4	0	0	0	0	0	1	NA	NA
A2BH06	Rpl11	0	0	1	0	0	1	NA	60S ribosomal protein L11 (Fragment) OS=Mus musculus OX=10090 GN=Rpl11 PE=1 SV=1
D3YXK0	Jakmip2	0	0	0	0	0	1	NA	NA
E0CYS0	Acot11	0	0	0	0	0	1	Acetylation (Protein N-term)	NA
F6SLP4	Ergic1	0	0	0	0	0	1	NA	NA
A0A494BAW5	Ergic1	0	0	0	0	0	1	NA	NA
A0A494BAK4	Ergic1	0	0	0	0	0	1	NA	NA
B1AR28	Acadvl	1	1	0	0	0	1	NA	NA
A0A0U1RNM2	Gatad2b	0	0	1	0	0	1	NA	Transcriptional repressor p66-beta (Fragment) OS=Mus musculus OX=10090 GN=Gatad2b PE=1 SV=1
A0A498WGR9	Ubash3a	0	0	0	0	0	1	NA	NA
A0A3Q4EG99	Mtch1	0	0	0	0	0	1	NA	NA
A0A3Q4EBT8	Mtch1	0	0	0	0	0	1	NA	NA
D3YXC2	Mtch1	0	0	0	0	0	1	NA	NA
A0A3Q4EC24	Mtch1	0	0	0	0	0	1	NA	NA
A0A3Q4EGL4	Mtch1	0	0	0	0	0	1	NA	NA
A0A087WQM9	Serpinb5	0	0	0	0	0	1	NA	NA
Q8BG13	Rbm3	0	0	0	0	0	1	NA	NA
Q3U3K9	Aup1	0	0	0	0	0	1	NA	NA
D3Z6N5	Krt7	0	0	1	0	0	4	Acetylation (Protein N-term)	Keratin type II cytoskeletal 7 (Fragment) OS=Mus musculus OX=10090 GN=Krt7 PE=1 SV=1
A2AWR2	Gpr155	0	0	0	0	0	2	NA	NA
A2AWR3	Gpr155	0	0	0	0	0	2	NA	NA
S4R2H5	Rpf2	0	0	0	0	0	1	NA	NA
A0A0U1RQ71	Rps13	0	0	0	0	0	1	NA	NA
A0A140T8M2	Igkv12-44	0	0	0	0	0	1	NA	NA
E9Q616	Ahnak	0	0	0	0	0	1	NA	NA
A0A0N4SUM8	Gm45140	0	0	0	0	0	1	NA	NA
A0A2I3BRX3	Sfmbt1	0	0	0	0	0	1	NA	NA
A0A2I3BPX6	Sfmbt1	0	0	0	0	0	1	NA	NA
V9GWY8	Pigb	0	0	0	0	0	1	NA	NA
D6RCK1	Rad51	2	2	0	0	0	1	NA	NA
G5E898	Ppl	0	0	0	0	0	1	NA	NA
F7CR78	Ttn	2	3	3	0	0	1	NA	Titin (Fragment) OS=Mus musculus OX=10090 GN=Ttn PE=1 SV=1
A0A1D5RLF2	Psme3ip1	1	1	0	0	0	1	NA	NA
A0A1D5RLI3	Psme3ip1	1	1	0	0	0	1	NA	NA
A0A1D5RLY1	Psme3ip1	1	1	0	0	0	1	NA	NA
A0A1D5RLD7	Psme3ip1	0	0	0	0	0	1	NA	NA
A0A1D5RLT4	Psme3ip1	0	0	0	0	0	1	NA	NA
A0A1D5RLJ3	Psme3ip1	0	0	0	0	0	1	NA	NA
G5E8X2	Pabpc4l	0	0	4	0	0	3	Oxidation (M)	MCG12357 OS=Mus musculus OX=10090 GN=Pabpc4l PE=4 SV=1
E9Q263	Unc13b	0	0	0	0	0	1	Acetylation (Protein N-term)	NA
B1ATV0	Clcn5	0	0	0	0	0	1	NA	NA
A2BFF8	Dync1i2	0	0	6	0	0	1	NA	Cytoplasmic dynein 1 intermediate chain 2 OS=Mus musculus OX=10090 GN=Dync1i2 PE=1 SV=1
A2AQN9	Gss	0	0	0	0	0	1	NA	NA
A0A0G2JEX7	Rps27	0	0	0	0	0	1	Carbamidomethylation	NA
A0A0G2JFT9	Prkacb	0	0	0	0	0	1	NA	NA
Q80X68	Csl	0	0	2	0	0	1	NA	Citrate synthase OS=Mus musculus OX=10090 GN=Csl PE=1 SV=1
Q3TTL3	Spata7	0	0	0	0	0	1	NA	NA
Q3U5D0	Spata7	0	0	0	0	0	1	NA	NA
G3UYD0	Gtf2i	0	5	2	0	0	1	NA	General transcription factor II-I OS=Mus musculus OX=10090 GN=Gtf2i PE=1 SV=1
V9GXD2	Hmgcll1	0	0	0	0	0	1	NA	NA
V9GWZ9	Hmgcll1	0	0	0	0	0	1	NA	NA
D3YVU9	Hmgcll1	0	0	0	0	0	1	NA	NA
A0A1B0GR11	Taldo1	0	0	0	0	0	1	NA	NA
E9Q0I8	Homer1	0	0	0	0	0	1	NA	NA
E9Q0I7	Homer1	0	0	0	0	0	1	NA	NA
D3Z6A7	Homer1	0	0	0	0	0	1	NA	NA
G3X9M2	Skida1	1	0	0	0	0	1	Carbamidomethylation	NA
Q80ZX2	Zfp790	0	0	0	0	0	1	NA	NA
Q4VBG2	Magi1	0	0	0	0	0	1	NA	NA
A0A0R4J0S6	Magi1	0	0	0	0	0	1	NA	NA
A0A0N4SUZ0	Magi1	0	0	0	0	0	1	NA	NA
B1B1A8	Mylk	1	0	0	0	0	1	NA	NA
Q7TSJ7	Mapk8	1	0	0	0	0	1	NA	NA
Q91WA9	Abcg4	0	0	0	0	0	1	Carbamidomethylation	NA
F6XWY6	Abcg4	0	0	0	0	0	1	Carbamidomethylation	NA
E9Q3Y7	Cracd	0	0	0	0	0	1	NA	NA
E9Q5L4	Cracd	0	0	0	0	0	1	NA	NA
F6RYL8	Dmxl2	0	0	0	0	0	1	NA	NA
B0V2P5	Dmxl2	0	0	0	0	0	1	NA	NA
E0CZ90	Psme2	0	0	0	0	0	1	NA	NA
Q8C5J0	Sp2	0	0	0	0	0	1	NA	NA
A0A0G2JFB4	Eif4e	0	5	0	0	0	1	NA	NA
A0A0G2JH04	Eif4e	0	5	0	0	0	1	NA	NA
A0A0G2JGT5	Eif4e	0	0	0	0	0	1	NA	NA
G3UWI7	B3gnt2	0	0	0	0	0	1	NA	NA
J3QNU1	Ate1	0	0	0	0	0	1	NA	NA
A0A0H2UH17	Ubap2l	4	3	4	0	0	1	NA	Ubiquitin associated protein 2-like isoform CRA_b OS=Mus musculus OX=10090 GN=Ubap2l PE=1 SV=1
W4VSP9	Rad18	0	0	0	0	0	1	NA	NA
F8WGE3	Abca8a	0	0	0	0	0	1	NA	NA
Q4KL31	Psg19	0	0	0	0	0	1	NA	NA
D6RFT4	Uty	0	0	0	0	0	1	NA	NA
E9PWW8	Uty	0	0	0	0	0	1	NA	NA
G3X9F2	Uty	0	0	0	0	0	1	NA	NA
E9Q6I2	Il1rap	0	0	0	0	0	1	NA	NA
Q3TX55	Arpc4	0	0	0	0	0	1	NA	NA
E9PWA7	Arpc4	0	0	0	0	0	1	NA	NA
Q3V1N5	Heca	0	0	0	0	0	1	NA	NA
A0A0A0MQG8	Zbtb48	0	0	0	0	0	1	NA	NA
B1AYU7	Cwc22	6	7	0	0	0	1	NA	NA
A0A1W2P729	Cnpy2	0	0	0	0	0	1	NA	NA
G3X8X7	Vps16	0	1	1	0	0	1	NA	Vacuolar protein sorting-associated protein 16 homolog OS=Mus musculus OX=10090 GN=Vps16 PE=1 SV=1
G5E823	Hars2	0	0	0	0	0	1	NA	NA
G3UWJ8	Kpna1	0	0	0	0	0	1	Acetylation (Protein N-term)	NA
G3UZK5	Kpna1	0	0	0	0	0	1	Acetylation (Protein N-term)	NA
E9Q405	Myo18a	1253	0	0	0	0	0	NA	NA
E9Q5I9	Psmd13	0	0	0	0	0	0	NA	NA
G3X9I4	Alyref2	19	0	0	0	0	0	NA	NA
H3BKR2	Gnb1	0	0	0	0	0	0	NA	NA
E9PV93	Ly9	3	1	0	0	0	0	NA	NA
E9PUD0	Zranb2	0	0	0	0	0	0	NA	NA
A0A494B908	Gstp1	0	0	0	0	0	0	NA	NA
A0A494BAW2	Gstp1	0	0	0	0	0	0	NA	NA
A0A2R8W6Y5	Larp4	25	24	0	0	0	0	NA	NA
H7BWZ3	Arpc3	0	0	0	0	0	0	NA	NA
I7HLV2	Rpl10	0	0	0	0	0	0	NA	NA
Q3TM89	Pcnp	0	3	0	0	0	0	NA	NA
A0A2I3BQP6	Camk2g	0	6	7	0	0	0	NA	Calcium/calmodulin-dependent protein kinase type II subunit gamma OS=Mus musculus OX=10090 GN=Camk2g PE=1 SV=1
F8WIS9	Camk2a	0	0	0	0	0	0	NA	NA
Q8CCM0	Camk2d	0	0	9	0	0	0	NA	Calcium/calmodulin-dependent protein kinase type II subunit delta OS=Mus musculus OX=10090 GN=Camk2d PE=1 SV=1
A0A338P6E8	Hmga1	0	0	0	0	0	0	NA	NA
F6YB25	Rprd1b	0	0	2	0	0	0	NA	Regulation of nuclear pre-mRNA domain-containing protein 1B (Fragment) OS=Mus musculus OX=10090 GN=Rprd1b PE=1 SV=1
H3BLD4	Kdm2a	0	0	0	0	0	0	NA	NA
S4R1F8	NA	0	0	0	0	0	0	NA	NA
Q9Z1A1	Tfg	0	0	0	0	0	0	NA	NA
A8Y5G7	Pold2	0	0	0	0	0	0	NA	NA
E0CXP3	Cd3g	0	1	0	0	0	0	NA	NA
G5E8D1	Sprr2k	2	0	0	0	0	0	NA	NA
A9JTY7	Sprr2b	2	0	2	0	0	0	NA	MCG119409 OS=Mus musculus OX=10090 GN=Sprr2b PE=2 SV=1
Z4YMT7	Tmem268	0	0	0	0	0	0	NA	NA
Z4YLK8	Tmem268	0	0	0	0	0	0	NA	NA
E9PYF2	Adam10	0	0	0	0	0	0	NA	NA
V9GXI0	Snapin	0	0	0	0	0	0	NA	NA
E9PXU2	Adam17	0	0	0	0	0	0	NA	NA
B7ZBY7	Ube2v1	0	0	0	0	0	0	NA	NA
E9PY39	Gm20431	0	0	0	0	0	0	NA	NA
B2KF55	Ube2v2	0	0	0	0	0	0	NA	NA
A6X925	Ube2v2	0	0	0	0	0	0	NA	NA
B7ZBY6	Ube2v1	0	0	0	0	0	0	NA	NA
E9PZF0	Gm20390	1	2	0	0	0	0	NA	NA
A2ALT5	Ahcy	0	0	0	0	0	0	NA	NA
A0A1L1SR69	Higd1a	0	0	0	0	0	0	NA	NA
A0A1L1SV00	Higd1a	0	0	0	0	0	0	NA	NA
Q8R472	Higd1a	0	0	0	0	0	0	NA	NA
Q8BX20	Eif1ad7	0	0	0	0	0	0	NA	NA
J3QP87	Eif1ad14	0	0	0	0	0	0	NA	NA
Q3TQZ4	Eif1ad3	0	0	0	0	0	0	NA	NA
A0A1Y7VK80	Eif1ad12	0	0	0	0	0	0	NA	NA
A0A1Y7VJE9	Eif1ad13	0	0	0	0	0	0	NA	NA
J3QNT6	Eif1ad15	0	0	0	0	0	0	NA	NA
Q3UTA4	Eif1ad10	0	0	0	0	0	0	NA	NA
J3QQ02	Eif1ad11	0	0	0	0	0	0	NA	NA
A0A1Y7VLT7	Eif1ad4	0	0	0	0	0	0	NA	NA
A0A1Y7VNG9	Eif1ad18	0	0	0	0	0	0	NA	NA
J3QMW5	Eif1ad17	0	0	0	0	0	0	NA	NA
Q3UT53	Eif1ad2	0	0	0	0	0	0	NA	NA
J3QPI8	Eif1ad16	0	0	0	0	0	0	NA	NA
F6QPR1	Phb2	0	0	0	0	0	0	NA	NA
A0A286YDB8	Elp3	1	0	0	0	0	0	NA	NA
A0A1Y7VJG9	Ppp4r3a	0	0	0	0	0	0	NA	NA
A0A0A6YW28	Usp4	5	7	6	0	0	0	NA	Ubiquitin carboxyl-terminal hydrolase OS=Mus musculus OX=10090 GN=Usp4 PE=1 SV=1
A2BIN0	Mup11	2	3	1	0	0	0	NA	Major urinary protein 11 OS=Mus musculus OX=10090 GN=Mup9 PE=3 SV=1
B8JI96	Mup14	2	3	1	0	0	0	NA	Major urinary protein 14 (Fragment) OS=Mus musculus OX=10090 GN=Mup14 PE=1 SV=1
A2CEL1	Mup1	2	3	1	0	0	0	NA	Major urinary protein 1 OS=Mus musculus OX=10090 GN=Mup1 PE=3 SV=1
A2AKN9	Mup2	2	3	1	0	0	0	NA	Major urinary protein 2 OS=Mus musculus OX=10090 GN=Mup2 PE=1 SV=1
A2CEK7	Mup14	2	3	1	0	0	0	NA	Major urinary protein 12 OS=Mus musculus OX=10090 GN=Mup14 PE=3 SV=1
A9R9W0	Mup15	2	3	1	0	0	0	NA	Major urinary protein 15 OS=Mus musculus OX=10090 GN=Mup15 PE=3 SV=1
J3QMG3	Vdac3	8	3	0	0	0	0	NA	NA
A0A1W2P7U7	Pwp1	0	0	0	0	0	0	NA	NA
A0A2R8W753	Rangap1	0	0	1	0	0	0	NA	Ran GTPase-activating protein 1 (Fragment) OS=Mus musculus OX=10090 GN=Rangap1 PE=1 SV=1
A0A2R8VHK9	Rangap1	0	0	1	0	0	0	NA	Ran GTPase-activating protein 1 (Fragment) OS=Mus musculus OX=10090 GN=Rangap1 PE=1 SV=1
Q9D4T3	Pelp1	0	0	0	0	0	0	NA	NA
F7CXJ2	Dnajc8	0	0	1	0	0	0	NA	DnaJ homolog subfamily C member 8 (Fragment) OS=Mus musculus OX=10090 GN=Dnajc8 PE=1 SV=1
K4DI63	Creg1	0	0	0	0	0	0	NA	NA
F6SGT4	Exosc8	0	0	0	0	0	0	NA	NA
D3YYN3	Exosc8	0	0	0	0	0	0	NA	NA
A0A1B0GSR4	Ruvbl2	0	0	0	0	0	0	NA	NA
E9PX09	Carns1	0	0	0	0	0	0	NA	NA
A0A2I3BQK1	Cyrib	0	0	0	0	0	0	NA	NA
E9Q3Q7	Skp1	0	0	0	0	0	0	NA	NA
A0A0A6YW87	Cnih4	0	0	0	0	0	0	NA	NA
A2AMD0	Larp7-ps	0	0	0	0	0	0	NA	NA
A0A2I3BRD2	Ano6	0	0	0	0	0	0	NA	NA
A0A2I3BPY8	Ano6	0	0	0	0	0	0	NA	NA
D6RGT1	Tamm41	0	0	0	0	0	0	NA	NA
G3UWL8	Tamm41	0	0	0	0	0	0	NA	NA
F6RWR5	Gstp3	5	0	0	0	0	0	NA	NA
F6VP43	Pcnx3	0	0	0	0	0	0	NA	NA
A0A0J9YUY4	Ube3a	0	0	0	0	0	0	NA	NA
A0A0U1RQ72	Gpi1	0	0	0	0	0	0	NA	NA
A0A0G2JFV4	Rnf115	0	0	0	0	0	0	NA	NA
E0CYH4	Wdr26	0	0	0	0	0	0	NA	NA
A0A087WP13	Plekha6	3	5	0	0	0	0	NA	NA
A2ANL9	Tenm1	0	0	0	0	0	0	NA	NA
D3Z365	Hk1	0	1	0	0	0	0	NA	NA
E9QME5	Trim33	2	0	3	0	0	0	NA	E3 ubiquitin-protein ligase TRIM33 OS=Mus musculus OX=10090 GN=Trim33 PE=1 SV=1
Q3TTL2	Kif2c	1	4	0	0	0	0	NA	NA
A0A1L1SVK0	Pafah1b2	1	0	0	0	0	0	NA	NA
B8JJC1	Tdp1	0	0	0	0	0	0	NA	NA
Q8BSL0	Zkscan8	0	0	0	0	0	0	NA	NA
Q3TG45	Psmd8	0	0	0	0	0	0	NA	NA
B1ART1	Vps13d	0	0	0	0	0	0	NA	NA
B1ART2	Vps13d	0	0	0	0	0	0	NA	NA
V9GX23	Vps13d	0	0	0	0	0	0	NA	NA
R4GML4	Cntrl	0	2	0	0	0	0	NA	NA
A2AK40	Slc30a4	0	0	0	0	0	0	NA	NA
D3Z7M9	Anp32a	0	0	0	0	0	0	NA	NA
E9Q3P4	Cenpf	0	0	0	0	0	0	NA	NA
E9PY14	Cenpf	0	0	0	0	0	0	NA	NA
A0A3Q4EHR0	Rhoq	0	0	0	0	0	0	NA	NA
E9PZ53	Naa16	0	0	0	0	0	0	NA	NA
D3YU23	Adgrl3	0	0	0	0	0	0	NA	NA
D3Z3X6	Adgrl3	0	0	0	0	0	0	NA	NA
H3BIZ7	Frmd4a	1	0	0	0	0	0	NA	NA
G5E8J9	Scyl2	242	191	39	0	0	0	NA	SCY1-like protein 2 OS=Mus musculus OX=10090 GN=Scyl2 PE=1 SV=1
D3Z6I8	Tpm3	203	185	149	0	0	0	NA	Tropomyosin alpha-3 chain OS=Mus musculus OX=10090 GN=Tpm3 PE=1 SV=1
A0A0G2JFV5	Lrrfip2	216	158	0	0	0	0	NA	NA
A0A2R8VHF9	Myh11	101	103	0	0	0	0	NA	NA
A0A338P6K2	Myh11	101	103	0	0	0	0	NA	NA
E9QPE7	Myh11	101	103	0	0	0	0	NA	NA
A0A1L1SSC0	Lrrfip2	92	69	82	0	0	0	NA	Leucine-rich repeat flightless-interacting protein 2 OS=Mus musculus OX=10090 GN=Lrrfip2 PE=1 SV=1
[truncated: 4,384 more rows]

## Sheet: sti_all_diff_gene
gene_name	logFC	logCPM	LR	PValue	FDR	log10FDR	DEG
H2-K1	10.0071	10.9458	70.6117	4.35e-17	4.64e-14	13.3335	Up
Lrrfip2	10.0676	11.0048	69.8337	6.45e-17	4.64e-14	13.3335	Up
Tnfrsf19	8.98211	9.95613	56.5024	5.61e-14	2.67e-11	10.5735	Up
Krt76	9.05638	10.0268	56.3069	6.2e-14	2.67e-11	10.5735	Up
Prmt1	8.87978	9.85871	52.6439	4e-13	1.44e-10	9.84164	Up
Na	8.7404	9.72697	51.0859	8.84e-13	2.39e-10	9.6216	Up
Hgs	8.7404	9.72697	51.077	8.88e-13	2.39e-10	9.6216	Up
Usp8	8.63355	9.6264	49.5732	1.91e-12	4.12e-10	9.3851	Up
Marchf7	8.41823	9.42536	46.1448	1.1e-11	1.97e-09	8.70553	Up
Tmem176b	7.05963	12.5625	45.6215	1.43e-11	2.38e-09	8.62342	Up
Cmip	6.91513	9.5793	44.1949	2.97e-11	4.27e-09	8.36957	Up
Stam2	8.01495	9.05525	42.6356	6.59e-11	8.89e-09	8.0511	Up
H2-T23	7.87938	8.93308	42.1575	8.42e-11	1.07e-08	7.97062	Up
Syncrip	7.76049	8.82686	40.3852	2.09e-10	2.37e-08	7.62525	Up
Zdhhc20	7.71528	8.78679	40.1996	2.29e-10	2.47e-08	7.6073	Up
Mfap3	7.6346	8.71557	39.2164	3.79e-10	3.89e-08	7.41005	Up
Ankrd13a	7.51635	8.61201	38.7729	4.76e-10	4.67e-08	7.33068	Up
Lnpep	7.65344	8.73204	38.3454	5.93e-10	5.56e-08	7.25493	Up
Ifngr1	7.49998	8.59791	36.8723	1.26e-09	1.13e-07	6.94692	Up
Ganab	5.67831	9.57812	36.3841	1.62e-09	1.4e-07	6.85387	Up
Rab5a	7.39816	8.51001	36.1544	1.82e-09	1.51e-07	6.82102	Up
Bmpr2	6.6316	9.31182	33.8621	5.92e-09	4.4e-07	6.35655	Up
Csnk1g3	7.18456	8.32865	33.2108	8.27e-09	5.75e-07	6.24033	Up
Calr	4.76415	10.0058	32.5072	1.19e-08	7.32e-07	6.13549	Up
Tgfbr2	7.75926	8.82229	31.8641	1.65e-08	9.38e-07	6.0278	Up
Notch2	5.17098	8.70719	29.5426	5.47e-08	3.01e-06	5.52143	Up
Ptpra	7.13138	8.28322	29.5043	5.58e-08	3.01e-06	5.52143	Up
Aldh3b1	5.0924	8.63999	28.441	9.66e-08	4.8e-06	5.31876	Up
Stam	7.0139	8.18622	28.3791	9.97e-08	4.8e-06	5.31876	Up
Tollip	5.35296	8.9105	28.1399	1.13e-07	5.18e-06	5.28567	Up
Bcap31	4.70941	9.06922	27.8842	1.29e-07	5.79e-06	5.23732	Up
Sdcbp	5.13516	9.7596	27.6607	1.45e-07	6.35e-06	5.19723	Up
Cnnm4	6.97893	8.15734	27.6249	1.47e-07	6.35e-06	5.19723	Up
Tgfbr1	7.11191	8.26576	27.414	1.64e-07	6.94e-06	5.15864	Up
Tom1l2	6.8703	8.06996	26.6649	2.42e-07	9.84e-06	5.007	Up
Prkcsh	5.5184	8.37559	26.2013	3.08e-07	1.21e-05	4.91721	Up
Rnf149	4.43423	9.49373	25.8514	3.69e-07	1.39e-05	4.85699	Up
Cfdp1	4.50088	8.91506	25.679	4.03e-07	1.5e-05	4.82391	Up
Atp2c1	6.95979	8.14009	25.38	4.71e-07	1.72e-05	4.76447	Up
Bag3	6.98744	8.16313	25.2595	5.01e-07	1.79e-05	4.74715	Up
Golga3	7.29994	8.41953	25.2165	5.12e-07	1.79e-05	4.74715	Up
Ifnar1	6.95705	8.13793	25.2028	5.16e-07	1.79e-05	4.74715	Up
Ptprj	6.74376	7.96904	25.0869	5.48e-07	1.88e-05	4.72584	Up
Pdia3	3.37621	11.6167	24.948	5.89e-07	1.96e-05	4.70774	Up
Cxcr4	6.73181	7.95995	24.9285	5.95e-07	1.96e-05	4.70774	Up
Stip1	3.49992	10.1687	24.9132	6e-07	1.96e-05	4.70774	Up
Gja1	4.90384	10.1539	24.2213	8.59e-07	2.72e-05	4.56543	Up
Itch	3.46102	9.89864	24.181	8.77e-07	2.74e-05	4.56225	Up
Hspa4	4.44989	11.6504	24.1503	8.91e-07	2.74e-05	4.56225	Up
Abcb1b	4.31144	9.39824	23.9357	9.96e-07	2.94e-05	4.53165	Up
Rab5b	6.71042	7.94216	23.8678	1.03e-06	2.96e-05	4.52871	Up
H2-D1	6.76736	7.98842	23.865	1.03e-06	2.96e-05	4.52871	Up
Il6st	4.64414	8.70805	23.8494	1.04e-06	2.96e-05	4.52871	Up
Abcb6	4.85557	8.43979	23.556	1.21e-06	3.4e-05	4.46852	Up
Ftl1	4.73965	9.71666	23.4387	1.29e-06	3.56e-05	4.44855	Up
Tmem9	6.72317	7.95137	23.3255	1.37e-06	3.73e-05	4.42829	Up
Cacybp	6.67377	7.91483	23.1341	1.51e-06	4.02e-05	4.39577	Up
Vamp7	6.89469	8.093	22.7116	1.88e-06	4.95e-05	4.30539	Up
Abca2	7.12356	8.26971	22.3799	2.24e-06	5.81e-05	4.23582	Up
Snap23	6.54822	7.81707	22.276	2.36e-06	6.06e-05	4.21753	Up
Il17ra	4.71303	8.30377	22.1961	2.46e-06	6.24e-05	4.20482	Up
Vti1b	6.61255	7.86553	21.8065	3.02e-06	7.47e-05	4.12668	Up
Rab5c	4.0722	9.48014	21.6331	3.3e-06	8.09e-05	4.09205	Up
St13	5.41543	8.98016	21.4822	3.57e-06	8.55e-05	4.06803	Up
Sema6a	6.56887	7.83159	21.4746	3.59e-06	8.55e-05	4.06803	Up
H2bc26	7.97017	9.02121	21.4537	3.62e-06	8.55e-05	4.06803	Up
Rab35	6.69049	7.92405	21.4417	3.65e-06	8.55e-05	4.06803	Up
H2bu2	7.97016	9.02121	21.4169	3.69e-06	8.57e-05	4.06702	Up
Psmc3	7.93155	8.98654	21.3866	3.75e-06	8.61e-05	4.065	Up
Hyou1	8.23526	9.26072	21.096	4.37e-06	9.81e-05	4.00833	Up
Naglu	6.62601	7.8748	20.8418	4.99e-06	0.000108635	3.96403	Up
Rbbp7	7.77547	8.83417	20.5349	5.86e-06	0.000125366	3.90182	Up
Igkv1-122	8.20351	9.21802	20.5292	5.87e-06	0.000125366	3.90182	Up
Set	6.79764	8.00683	20.4655	6.07e-06	0.00012709	3.89589	Up
Fyn	6.52102	7.79438	20.2967	6.63e-06	0.000134416	3.87155	Up
Rab8a	6.36576	7.6808	20.2854	6.67e-06	0.000134416	3.87155	Up
Cnnm3	6.64693	7.88909	20.172	7.08e-06	0.000140002	3.85387	Up
Slc35f2	6.37733	7.68869	20.0214	7.66e-06	0.000148741	3.82757	Up
Tmprss11e	4.1417	9.03713	19.8244	8.49e-06	0.000163418	3.7867	Up
Tyro3	6.53611	7.8043	19.5487	9.81e-06	0.000182269	3.73929	Up
Csnk1g1	5.09717	7.99801	19.302	1.12e-05	0.000205631	3.68691	Up
Rab9a	6.2439	7.592	19.189	1.18e-05	0.000216321	3.6649	Up
Golga7	6.48811	7.77536	19.0512	1.27e-05	0.000230562	3.63721	Up
Erbb4	6.47218	7.75631	18.8723	1.4e-05	0.000249038	3.60373	Up
Wwp1	4.29631	8.79964	18.7747	1.47e-05	0.000257857	3.58862	Up
Efr3a	6.33385	7.65549	18.6307	1.59e-05	0.000275833	3.55935	Up
Tmem168	6.33037	7.65303	18.5561	1.65e-05	0.000284557	3.54583	Up
Gm5414	7.31738	8.43202	18.498	1.7e-05	0.000287698	3.54106	Up
Ddr1	6.34197	7.6608	18.4899	1.71e-05	0.000287698	3.54106	Up
Atp6v0a2	6.28092	7.61625	18.218	1.97e-05	0.000326722	3.48582	Up
Relt	6.2045	7.56207	17.8143	2.44e-05	0.000394791	3.40363	Up
Atp6v1e1	6.20453	7.56207	17.7823	2.48e-05	0.000398505	3.39957	Up
Timd2	4.46395	8.17367	17.4068	3.02e-05	0.000470356	3.32757	Up
Pdf	6.04802	7.45365	17.3974	3.03e-05	0.000470356	3.32757	Up
Ndfip2	4.06092	8.23282	17.2256	3.32e-05	0.000505903	3.29593	Up
Tom1	3.5148	9.07075	17.2184	3.33e-05	0.000505903	3.29593	Up
Lrp10	3.50501	8.32995	17.1828	3.4e-05	0.00050925	3.29307	Up
Tmprss11f	6.0208	7.43627	17.1661	3.42e-05	0.00050925	3.29307	Up
Steap3	3.58059	9.07799	17.1112	3.53e-05	0.000520606	3.28349	Up
H3c2	3.2688	9.38058	16.6891	4.4e-05	0.000637136	3.19577	Up
H3-3a	3.26883	9.38058	16.6314	4.54e-05	0.000652361	3.18551	Up
H3c14	3.26884	9.38058	16.6191	4.57e-05	0.000652361	3.18551	Up
H3f3a	3.26885	9.38058	16.6006	4.61e-05	0.000654412	3.18415	Up
H3-5	3.26892	9.38058	16.4872	4.9e-05	0.00068143	3.16658	Up
H3c1	3.26892	9.38058	16.4762	4.93e-05	0.00068143	3.16658	Up
Srebf1	5.97799	7.40542	16.4746	4.93e-05	0.00068143	3.16658	Up
Hspa4l	3.98566	9.40811	16.3988	5.13e-05	0.000704722	3.15198	Up
Cdip1	5.86921	7.33431	16.1008	6.01e-05	0.000818816	3.08681	Up
Rgs19	4.78968	7.80685	16.0689	6.11e-05	0.000818816	3.08681	Up
Clcn6	5.98809	7.41137	16.0595	6.14e-05	0.000818816	3.08681	Up
Elfn2	5.88409	7.34342	16.0551	6.15e-05	0.000818816	3.08681	Up
Bst2	5.98812	7.41137	16.0292	6.24e-05	0.000819959	3.08621	Up
Atp2b1	6.15703	7.52578	15.9991	6.34e-05	0.000823178	3.08451	Up
Ogdh	2.96983	8.74301	15.9989	6.34e-05	0.000823178	3.08451	Up
Ldlr	5.87898	7.34033	15.9679	6.44e-05	0.000826566	3.08272	Up
Adgrl3	6.15708	7.52578	15.9572	6.48e-05	0.000826566	3.08272	Up
Lrp12	6.16596	7.53131	15.9189	6.61e-05	0.000838485	3.0765	Up
Itm2b	2.84406	9.15573	15.8953	6.69e-05	0.000839158	3.07616	Up
Ighv1-66	5.89922	7.35252	15.8237	6.95e-05	0.000861479	3.06476	Up
Cep55	6.32195	7.64046	15.7119	7.38e-05	0.000908711	3.04157	Up
Ugcg	3.2424	8.51399	15.5373	8.09e-05	0.000979791	3.00887	Up
Atp6v0d1	5.99874	7.4173	15.4091	8.66e-05	0.00104274	2.98183	Up
Top2b	6.75722	7.98768	15.0957	0.000102196	0.00120401	2.91937	Up
Atp6v1b2	4.16101	9.39598	15.07	0.000103596	0.00121387	2.91583	Up
Tm7sf3	6.33161	7.64583	15.0574	0.000104289	0.00121539	2.91528	Up
Laptm4a	6.24552	7.59966	14.803	0.000119346	0.00136867	2.8637	Up
Dhx15	6.65253	7.90749	14.5709	0.000134985	0.00153722	2.81327	Up
Acvr1	6.47632	7.75012	14.5561	0.000136045	0.00153722	2.81327	Up
Itm2a	2.59474	9.52406	14.542	0.000137067	0.00153722	2.81327	Up
Acvr1b	4.82532	7.83356	14.5346	0.000137608	0.00153722	2.81327	Up
Tnfrsf8	5.79517	7.28525	14.4135	0.000146748	0.00163087	2.78758	Up
Fth1	3.7328	10	14.2116	0.000163363	0.0018062	2.74323	Up
Snx3	6.5577	7.83465	13.9498	0.000187756	0.00204446	2.68942	Up
Tmem127	5.49414	7.09966	13.934	0.000189345	0.0020514	2.68795	Up
Anp32b	5.50003	7.10302	13.8973	0.000193079	0.00208139	2.68165	Up
Gusb	5.72794	7.24065	13.781	0.000205406	0.00220326	2.65693	Up
Gosr1	6.03642	7.43785	13.7187	0.000212327	0.00226622	2.6447	Up
Serinc1	5.51231	7.10975	13.5925	0.000227093	0.00239916	2.61994	Up
Lgals8	5.73978	7.24703	13.584	0.000228121	0.00239916	2.61994	Up
Ptger4	5.64594	7.188	13.1031	0.000294803	0.00303876	2.5173	Up
Pdcd1	2.87072	8.95219	12.9817	0.000314543	0.00318383	2.49705	Up
Igsf8	5.4083	7.04865	12.9702	0.000316489	0.00318856	2.49641	Up
Rspry1	5.26813	6.97068	12.9366	0.000322227	0.00323126	2.49063	Up
Scarb2	5.249	6.96002	12.8808	0.000331973	0.00331358	2.4797	Up
Gna11	5.53202	7.11982	12.8543	0.000336704	0.00332997	2.47756	Up
Macroh2a1	5.26182	6.96713	12.7323	0.000359388	0.00350606	2.45518	Up
Ifitm3	5.81845	7.30677	12.6962	0.000366401	0.0035436	2.45056	Up
Brox	5.76526	7.25978	12.6299	0.000379628	0.00365392	2.43724	Up
Tax1bp1	5.65963	7.19454	12.4995	0.000407072	0.00390065	2.40886	Up
Vamp3	6.33023	7.66703	12.4663	0.000414359	0.0039355	2.405	Up
Grb2	5.77152	7.26293	12.4166	0.000425541	0.00402398	2.39534	Up
Cse1l	5.37642	7.03139	12.3629	0.000437953	0.00410533	2.38665	Up
Tsg101	5.12295	6.89261	12.3283	0.000446154	0.00416411	2.38048	Up
Atrn	6.07085	7.45551	12.2401	0.000467743	0.0043306	2.36345	Up
Atp11c	5.65417	7.1913	12.2365	0.000468648	0.0043306	2.36345	Up
Enkd1	5.14316	6.90357	12.1939	0.000479456	0.00436163	2.36035	Up
Ifitm2	6.22896	7.59163	12.12	0.00049883	0.00451881	2.34498	Up
Hspa2	2.56395	13.1158	11.9607	0.000543343	0.00490146	2.30967	Up
Hsp90b1	2.35639	10.422	11.9219	0.000554793	0.00498389	2.30243	Up
Atp6v1a	2.24004	9.80796	11.7951	0.000593869	0.00526906	2.27827	Up
Scamp3	6.31012	7.62994	11.7751	0.000600282	0.0052927	2.27632	Up
Slc38a1	5.13692	6.89991	11.7715	0.000601444	0.0052927	2.27632	Up
Chmp4b	4.3058	7.47126	11.7506	0.000608227	0.00532116	2.27399	Up
Stom	5.15117	6.90722	11.7324	0.000614229	0.00533983	2.27247	Up
Stx11	5.15122	6.90722	11.7137	0.000620423	0.00537201	2.26986	Up
Adcy3	5.30472	6.9884	11.6841	0.000630349	0.00543613	2.26471	Up
Chic2	5.3048	6.9884	11.6603	0.000638489	0.0054844	2.26087	Up
Rps15a	6.15426	7.54017	11.6349	0.00064727	0.00553776	2.25667	Up
Rab7a	3.10587	8.20752	11.5467	0.000678705	0.00573839	2.24121	Up
Rpl18	6.19564	7.55403	11.4656	0.000708947	0.00594743	2.22567	Up
Yipf3	5.56816	7.13658	11.4522	0.000714112	0.00596754	2.2242	Up
Plekhb2	4.98404	6.82197	11.4305	0.000722473	0.0060141	2.22083	Up
Stxbp2	6.01874	7.44618	11.127	0.000850814	0.00694831	2.15812	Up
Cdc73	5.4118	7.04866	11.1145	0.000856557	0.00696882	2.15684	Up
Crlf2	4.97697	6.8182	11.0796	0.000872811	0.00707436	2.15031	Up
Abcc4	4.99952	6.82946	10.9537	0.000934183	0.00751529	2.12405	Up
Bnip3l	5.0074	6.83323	10.8791	0.000972569	0.00779501	2.10818	Up
Stard3	6.09923	7.47979	10.8714	0.000976604	0.00779836	2.108	Up
Ptpn6	3.36593	8.68388	10.832	0.000997632	0.0079077	2.10195	Up
Bnip3	3.84677	7.72236	10.6769	0.00108483	0.00848872	2.07116	Up
Atp6v1d	4.82182	6.74388	10.5309	0.00117395	0.0091373	2.03918	Up
Slc16a6	4.82187	6.74388	10.5034	0.00119156	0.00924101	2.03428	Up
Ezr	3.44865	8.5926	10.4857	0.00120304	0.0092966	2.03168	Up
Ranbp1	2.3361	9.0658	10.4563	0.0012223	0.00941173	2.02633	Up
Trim32	5.47073	7.07618	10.4226	0.00124483	0.00952095	2.02132	Up
Acvr2a	4.82984	6.74776	10.4034	0.00125787	0.00958289	2.0185	Up
Stx4	5.95443	7.37961	10.3548	0.00129136	0.00973489	2.01167	Up
Rpf2	4.93714	6.79941	10.1658	0.00143068	0.0107102	1.9702	Up
Wbp1l	5.19505	6.92542	10.1533	0.00144047	0.0107462	1.96875	Up
Gcsam	4.04383	7.25987	9.93419	0.00162236	0.0117376	1.93042	Up
Ppp2r2a	5.4804	7.07963	9.8957	0.00165665	0.0119136	1.92396	Up
Pbdc1	4.62321	6.65367	9.89065	0.00166121	0.0119136	1.92396	Up
Ankrd46	4.78238	6.72456	9.88838	0.00166326	0.0119136	1.92396	Up
Galnt12	4.62319	6.65367	9.87811	0.00167257	0.0119406	1.92297	Up
Stx12	5.8158	7.29466	9.87191	0.00167821	0.0119413	1.92295	Up
Fxr1	4.79034	6.72845	9.86354	0.00168586	0.0119563	1.9224	Up
Pgk1	2.14459	8.78966	9.83269	0.00171437	0.0121186	1.91655	Up
Hmgb2	5.08236	6.87431	9.81115	0.00173457	0.0122188	1.91297	Up
Tyk2	5.0194	6.83695	9.80092	0.00174425	0.0122188	1.91297	Up
Bcap29	5.0194	6.83695	9.79956	0.00174554	0.0122188	1.91297	Up
Znrf3	5.8706	7.32254	9.71024	0.00183244	0.0126626	1.89748	Up
Vamp2	5.69499	7.23513	9.54443	0.00200557	0.0136509	1.86484	Up
Rab8b	5.62029	7.18622	9.54302	0.00200711	0.0136509	1.86484	Up
Spint2	4.82274	7.7838	9.5315	0.00201975	0.0136936	1.86348	Up
Ptprc	2.5973	8.99843	9.43678	0.00212677	0.0142844	1.84514	Up
Atp7a	4.63951	6.6616	9.24917	0.00235602	0.0155815	1.80739	Up
Tapbp	2.64282	8.10699	9.1128	0.00253827	0.0165382	1.78151	Up
Kcnn4	5.31297	7.00365	9.11225	0.00253903	0.0165382	1.78151	Up
Ubl3	5.43447	7.07265	9.10653	0.00254699	0.0165401	1.78146	Up
Dnajc7	2.15442	9.8216	9.08869	0.00257195	0.016652	1.77853	Up
Clpp	5.64484	7.18465	9.07409	0.00259256	0.0167352	1.77637	Up
Etfb	5.30519	7.00018	9.06218	0.00260951	0.0167943	1.77484	Up
Aurkb	4.6138	6.64965	9.04807	0.00262973	0.0168741	1.77278	Up
Slc9a8	4.61409	6.64975	9.02227	0.0026671	0.0170126	1.76923	Up
Ulbp1	3.97386	7.2147	8.9703	0.00274404	0.0173494	1.76072	Up
Susd6	4.41953	6.57068	8.95867	0.00276156	0.0174091	1.75922	Up
Ndfip1	1.87978	10.3334	8.94306	0.00278526	0.0175073	1.75678	Up
Zdhhc15	5.57414	7.13654	8.93503	0.00279752	0.0175241	1.75636	Up
Ighv1-19	5.55404	7.12657	8.92459	0.00281357	0.0175241	1.75636	Up
Il2rg	2.07433	9.09488	8.91685	0.00282552	0.0175241	1.75636	Up
Ighv1-36	5.55406	7.12657	8.91488	0.00282857	0.0175241	1.75636	Up
Igkc	2.20087	11.4284	8.8556	0.00292192	0.017999	1.74475	Up
Ptpn23	4.6687	6.67354	8.7966	0.00301793	0.0184848	1.73318	Up
Ablim1	5.19611	6.93867	8.76446	0.00307157	0.0187601	1.72676	Up
Snx12	5.19609	6.93867	8.7555	0.00308669	0.0187992	1.72586	Up
Trpv2	5.70901	7.21411	8.70628	0.00317115	0.019205	1.71658	Up
Csnk1d	4.00077	7.22755	8.66967	0.0032355	0.0194853	1.71029	Up
Pip4p2	5.30363	6.98486	8.62765	0.00331099	0.0198844	1.70149	Up
Lgals9	2.01767	9.4062	8.62065	0.00332373	0.0198976	1.7012	Up
Slc38a2	5.24722	6.96001	8.60288	0.00335633	0.0198976	1.7012	Up
Igkv1-117	4.02554	11.4355	8.6028	0.00335646	0.0198976	1.7012	Up
Septin11	5.30367	6.98486	8.60125	0.00335933	0.0198976	1.7012	Up
Gnai3	1.94582	9.68683	8.49181	0.00356748	0.0210726	1.67628	Up
Ccr9	5.06891	6.8707	8.4399	0.00367076	0.0215569	1.66641	Up
Klra1	4.42952	6.57483	8.4356	0.00367946	0.0215569	1.66641	Up
Stx8	2.43298	8.41379	8.38912	0.00377474	0.0218986	1.65958	Up
Irgm1	2.49026	8.33818	8.38038	0.00379292	0.0219237	1.65909	Up
Flot1	5.74297	7.23027	8.3741	0.00380607	0.0219409	1.65875	Up
Kct2	2.35344	8.16305	8.01186	0.00464719	0.0258898	1.58687	Up
9530068E07Rik	2.35345	8.16305	7.99439	0.00469226	0.0260547	1.58411	Up
Atp8a1	5.0163	6.83319	7.9396	0.00483644	0.0266555	1.57421	Up
Rnf13	4.75495	6.71684	7.93586	0.00484646	0.0266555	1.57421	Up
Ldlrad3	4.75487	6.71684	7.92178	0.00488433	0.0267955	1.57194	Up
Pdcd6ip	5.04536	6.84444	7.86569	0.00503816	0.0272237	1.56505	Up
Opn3	4.38196	6.55422	7.83172	0.00513373	0.027601	1.55908	Up
H2-M3	4.38193	6.55422	7.82727	0.00514638	0.027601	1.55908	Up
Cd48	5.01532	6.83327	7.77727	0.00529077	0.0283049	1.54814	Up
Amfr	5.06816	6.87064	7.75283	0.00536284	0.0285489	1.54441	Up
Wdr12	4.87671	6.76323	7.71974	0.00546203	0.0288168	1.54035	Up
Ccr8	4.87673	6.76323	7.71609	0.00547307	0.0288168	1.54035	Up
Pag1	5.13976	6.89995	7.71381	0.00548	0.0288168	1.54035	Up
Ncstn	4.80541	6.73609	7.70389	0.00551018	0.0288348	1.54008	Up
Rbfox2	4.15613	6.47011	7.63092	0.00573759	0.0295389	1.52961	Up
Ddx56	4.15613	6.47011	7.62997	0.00574063	0.0295389	1.52961	Up
Cpt1a	4.86769	6.75929	7.59688	0.00584695	0.0298612	1.52489	Up
Tspan3	4.86774	6.75929	7.58567	0.00588342	0.0298683	1.52479	Up
Hspa1l	4.00699	11.8768	7.57287	0.00592533	0.0299883	1.52305	Up
Abcc1	5.0759	6.85568	7.52758	0.00607615	0.0304598	1.51627	Up
Spag7	4.17252	6.47852	7.52373	0.00608914	0.0304598	1.51627	Up
Slc35a4	4.73195	6.70904	7.45343	0.00633157	0.0312586	1.50503	Up
Rab6b	4.56761	6.63378	7.43129	0.00640994	0.0314087	1.50295	Up
Hadhb	4.63273	6.65759	7.3611	0.00666499	0.0324373	1.48896	Up
Rnf19a	4.92124	6.77862	7.30272	0.00688503	0.0334327	1.47583	Up
Ctdsp1	4.6996	6.68156	7.27933	0.00697525	0.0337947	1.47115	Up
Adgre5	4.69974	6.68156	7.25886	0.00705521	0.0340292	1.46815	Up
Rftn1	4.69974	6.68156	7.25886	0.00705522	0.0340292	1.46815	Up
Msn	2.00624	9.26286	7.24672	0.00710305	0.0341103	1.46711	Up
Antxr2	4.69987	6.68156	7.23868	0.00713495	0.034142	1.46671	Up
Slc9a9	4.20588	6.4912	7.09628	0.00772442	0.0365216	1.43745	Up
Stard3nl	4.20605	6.4912	7.08362	0.00777918	0.0367	1.43533	Up
Adsl	4.20619	6.4912	7.07223	0.0078288	0.0367278	1.435	Up
Tmem185a	4.20621	6.4912	7.0709	0.00783457	0.0367278	1.435	Up
Adcy6	4.58711	6.64182	7.05301	0.0079132	0.0367278	1.435	Up
Tmem106b	4.72428	6.68948	7.04618	0.00794346	0.0367278	1.435	Up
Cd5	4.7243	6.68948	7.04439	0.00795137	0.0367278	1.435	Up
Syt13	4.65504	6.66571	7.04348	0.00795542	0.0367278	1.435	Up
Flt3	3.75986	7.11477	7.00588	0.00812424	0.0371887	1.42959	Up
Ubtd1	4.36536	6.55021	6.98997	0.00819679	0.0373621	1.42757	Up
Slc45a4	5.11773	6.87065	6.98081	0.00823883	0.0374359	1.42671	Up
Tacc2	4.36526	6.55021	6.97791	0.00825221	0.0374359	1.42671	Up
Tmem100	4.36524	6.55021	6.97512	0.00826508	0.0374359	1.42671	Up
Rab10	2.48314	7.94342	6.96243	0.0083239	0.0375446	1.42545	Up
Gpd2	2.52489	7.98451	6.91716	0.00853725	0.0381467	1.41854	Up
Rab21	4.43469	6.5747	6.88851	0.00867514	0.0384485	1.41512	Up
Clcn3	4.43474	6.5747	6.87389	0.00874639	0.0384759	1.41481	Up
Mcoln2	4.47088	6.58713	6.86713	0.00877954	0.0384759	1.41481	Up
Ccdc69	4.47088	6.58713	6.867	0.0087802	0.0384759	1.41481	Up
Sigmar1	4.35215	6.54606	6.78708	0.00918201	0.0399928	1.39802	Up
Itm2c	4.73889	6.71286	6.75809	0.00933234	0.0404026	1.39359	Up
Ptp4a1	4.37513	6.55436	6.75245	0.00936191	0.0404495	1.39309	Up
Mindy3	4.37511	6.55436	6.74877	0.00938123	0.0404519	1.39306	Up
Pitpnb	4.37508	6.55436	6.74423	0.00940511	0.0404739	1.39282	Up
Slc20a1	4.93637	6.78243	6.73662	0.00944534	0.040566	1.39184	Up
Hgsnat	4.39885	6.56239	6.71149	0.00957937	0.0410599	1.38658	Up
Fam171b	4.47257	6.587	6.6758	0.00977306	0.0416418	1.38047	Up
Vps4a	4.4726	6.587	6.67133	0.00979763	0.0416641	1.38024	Up
Gnai2	1.62922	9.9359	6.66758	0.00981826	0.0416696	1.38018	Up
Slc12a7	4.47267	6.587	6.66201	0.009849	0.0417179	1.37968	Up
Rhou	4.49769	6.59529	6.64595	0.00993815	0.042013	1.37662	Up
Hspa1a	3.78186	11.8966	6.62943	0.0100307	0.0421564	1.37514	Up
Hspa1b	3.78185	11.8966	6.62075	0.0100797	0.04228	1.37387	Up
Ap1m1	4.75248	6.6974	6.51951	0.0106698	0.044154	1.35503	Up
Atp13a3	4.75248	6.6974	6.51949	0.0106699	0.044154	1.35503	Up
Mvb12b	4.75258	6.6974	6.50903	0.0107328	0.0441833	1.35474	Up
Kcnq5	4.74098	6.6934	6.5081	0.0107384	0.0441833	1.35474	Up
Igkv8-27	4.12773	6.46171	6.37589	0.0115681	0.0469269	1.32858	Up
Rdh11	4.11568	6.45742	6.36245	0.0116561	0.0471438	1.32658	Up
Igkv8-19	4.12758	6.46171	6.35932	0.0116766	0.0471438	1.32658	Up
Igkv8-21	4.12752	6.46171	6.35317	0.0117172	0.0472191	1.32588	Up
Psme2	4.11548	6.45742	6.34658	0.0117608	0.0472324	1.32576	Up
Igkv8-30	4.12745	6.46171	6.34605	0.0117643	0.0472324	1.32576	Up
Ifng	4.1274	6.46171	6.34037	0.0118021	0.047296	1.32518	Up
Eef2	1.51389	10.9723	6.3143	0.0119768	0.0478185	1.3204	Up
Tnpo1	3.91478	6.39809	6.25588	0.0123782	0.0483798	1.31534	Up
Lmbrd2	3.91478	6.39809	6.25588	0.0123782	0.0483798	1.31534	Up
Yipf4	3.91478	6.39809	6.25588	0.0123782	0.0483798	1.31534	Up
Cbx1	1.62731	10.1293	6.25322	0.0123968	0.0483798	1.31534	Up
Lrrc8c	4.22934	6.49549	6.24633	0.0124451	0.0483798	1.31534	Up
Gm20518	3.90377	6.39366	6.2425	0.012472	0.0483798	1.31534	Up
Ttc21b	3.90377	6.39366	6.2425	0.012472	0.0483798	1.31534	Up
Ccnb1	3.90377	6.39366	6.2425	0.012472	0.0483798	1.31534	Up
Sigirr	3.90377	6.39366	6.2425	0.012472	0.0483798	1.31534	Up
Chmp1b2	3.90377	6.39366	6.2425	0.012472	0.0483798	1.31534	Up
Igf2r	3.90377	6.39366	6.2425	0.012472	0.0483798	1.31534	Up
Il9r	3.89422	6.38943	6.23363	0.0125347	0.0483798	1.31534	Up
Man2b1	3.89422	6.38943	6.23363	0.0125347	0.0483798	1.31534	Up
Ammecr1	4.22952	6.49549	6.23261	0.0125419	0.0483798	1.31534	Up
Pcdhgc5	4.22952	6.49549	6.23203	0.012546	0.0483798	1.31534	Up
Lypla2	3.88363	6.385	6.22132	0.0126221	0.0483798	1.31534	Up
Litaf	3.88363	6.385	6.22132	0.0126221	0.0483798	1.31534	Up
Dgcr2	4.22968	6.49549	6.21972	0.0126335	0.0483798	1.31534	Up
Vps37c	3.87452	6.38077	6.21347	0.0126782	0.0484537	1.31467	Up
Chchd3	4.20306	6.48708	6.20776	0.0127191	0.0484537	1.31467	Up
Spry4	4.20287	6.48692	6.20761	0.0127202	0.0484537	1.31467	Up
Abcc5	3.86436	6.37634	6.20224	0.0127589	0.0485154	1.31412	Up
Mdh2	3.55326	6.97331	6.19145	0.0128369	0.0486428	1.31298	Up
Scfd1	4.2032	6.48708	6.18931	0.0128524	0.0486428	1.31298	Up
Eif3k	3.83647	6.36326	6.17568	0.0129518	0.0486428	1.31298	Up
Cd84	3.83647	6.36326	6.17568	0.0129518	0.0486428	1.31298	Up
Wdr46	3.83647	6.36326	6.17568	0.0129518	0.0486428	1.31298	Up
Cmtm6	3.83647	6.36326	6.17568	0.0129518	0.0486428	1.31298	Up
Frrs1	3.8272	6.35883	6.16666	0.013018	0.0486428	1.31298	Up
Arl8b	3.8272	6.35883	6.16666	0.013018	0.0486428	1.31298	Up
FRRS1	3.8272	6.35883	6.16666	0.013018	0.0486428	1.31298	Up
Cd3d	3.8272	6.35883	6.16666	0.013018	0.0486428	1.31298	Up
Nt5e	1.61595	9.40867	6.1511	0.013133	0.0489875	1.30991	Up

## Sheet: sti_passway
	ONTOLOGY	ID	Description	GeneRatio	BgRatio	pvalue	p.adjust	qvalue	geneID	Count
GO:0016050	BP	GO:0016050	vesicle organization	39/330	359/28891	1.89375e-26	7.70376e-23	5.19485e-23	Usp8/Zdhhc20/Stam/Sdcbp/Rab5b/Abcb6/Tmem9/Vamp7/Snap23/Vti1b/Rab5c/Rab8a/Atp6v1e1/Tom1/Atp6v0d1/Atp6v1b2/Snx3/Tmem127/Gosr1/Vamp3/Tsg101/Atp6v1a/Chmp4b/Stx11/Atp6v1d/Stx12/Vamp2/Rab8b/Slc9a8/Zdhhc15/Gnai3/Stx8/Pdcd6ip/Clcn3/Vps4a/Ap1m1/Yipf4/Chmp1b2/Arl8b	39
GO:0006886	BP	GO:0006886	intracellular protein transport	45/330	857/28891	1.50689e-17	3.06502e-14	2.06682e-14	Hgs/Zdhhc20/Rab5a/Calr/Stam/Bcap31/Bag3/Hspa4/Rab5b/Vamp7/Vti1b/Rab5c/Fyn/Rab8a/Golga7/Srebf1/Snx3/Anp32b/Scarb2/Cse1l/Scamp3/Chmp4b/Stom/Stx11/Stxbp2/Bnip3l/Stx12/Bcap29/Vamp2/Rab8b/Zdhhc15/Ptpn23/Stx8/Irgm1/Hspa1l/Rab6b/Rftn1/Rab10/Rab21/Vps4a/Ap1m1/Ifng/Tnpo1/Vps37c/Scfd1	45
GO:0061024	BP	GO:0061024	membrane organization	42/330	765/28891	4.11803e-17	5.58405e-14	3.76547e-14	Hgs/Atp2c1/Cxcr4/Hspa4/Abcb1b/Vamp7/Abca2/Snap23/Vti1b/Rab8a/Timd2/Tom1/Cep55/Ugcg/Snx3/Gosr1/Brox/Vamp3/Atp11c/Chmp4b/Stx11/Bnip3l/Bnip3/Stx12/Vamp2/Rab8b/Ptprc/Kcnn4/Aurkb/Gnai3/Stx8/Flot1/Atp8a1/Pdcd6ip/Abcc1/Rftn1/Clcn3/Vps4a/Yipf4/Chmp1b2/Chchd3/Arl8b	42
GO:0007034	BP	GO:0007034	vacuolar transport	21/330	165/28891	3.73762e-16	3.14092e-13	2.118e-13	Hgs/Stam/Vamp7/Vti1b/Ndfip2/Atp6v0d1/Scarb2/Tsg101/Chmp4b/Ndfip1/Ptpn23/Stx8/Irgm1/Tmem106b/Hgsnat/Vps4a/Hspa1a/Chmp1b2/Igf2r/Vps37c/Arl8b	21
GO:0098657	BP	GO:0098657	import into cell	45/330	935/28891	3.86052e-16	3.14092e-13	2.118e-13	Hgs/Ankrd13a/Rab5a/Csnk1g3/Calr/Tgfbr2/Sdcbp/Ptprj/Itch/Rab5b/Vamp7/Abca2/Rab5c/Fyn/Tyro3/Csnk1g1/Timd2/Ldlr/Lrp12/Snx3/Scarb2/Ifitm3/Grb2/Tsg101/Slc38a1/Ezr/Vamp2/Ptprc/Il2rg/Snx12/Trpv2/Csnk1d/Pip4p2/Slc38a2/Flot1/Ldlrad3/Abcc1/Slc9a9/Rab21/Clcn3/Slc12a7/Rhou/Ifng/Lrrc8c/Arl8b	45
GO:0046649	BP	GO:0046649	lymphocyte activation	44/330	920/28891	1.06446e-15	7.21703e-13	4.86663e-13	H2-K1/Marchf7/H2-T23/Tgfbr2/Notch2/Ifnar1/Ptprj/Cxcr4/Gja1/Itch/H2-D1/Il6st/Vamp7/Fyn/Tyro3/Wwp1/Top2b/Itm2a/Lgals8/Ptger4/Atp11c/Stx11/Ptpn6/Tyk2/Ptprc/Atp7a/Ulbp1/Ndfip1/Il2rg/Igkc/Lgals9/Ccr9/Irgm1/H2-M3/Cd48/Pag1/Ncstn/Msn/Cd5/Flt3/Ifng/Il9r/Cd84/Cd3d	44
GO:0060627	BP	GO:0060627	regulation of vesicle-mediated transport	36/330	618/28891	1.39447e-15	8.10388e-13	5.46465e-13	Hgs/Ankrd13a/Rab5a/Calr/Stam/Sdcbp/Atp2c1/Ptprj/Rab5b/Vamp7/Abca2/Snap23/Rab5c/Rab8a/Snx3/Tsg101/Stxbp2/Ezr/Vamp2/Rab8b/Ptprc/Il2rg/Ptpn23/Snx12/Pip4p2/Lgals9/Flot1/Pdcd6ip/Msn/Syt13/Rab21/Vps4a/Gnai2/Ifng/Scfd1/Cd84	36
GO:0006906	BP	GO:0006906	vesicle fusion	18/330	126/28891	6.32124e-15	3.21435e-12	2.16752e-12	Vamp7/Snap23/Vti1b/Rab8a/Tom1/Gosr1/Vamp3/Chmp4b/Stx11/Stx12/Vamp2/Rab8b/Gnai3/Stx8/Vps4a/Yipf4/Chmp1b2/Arl8b	18
GO:0090174	BP	GO:0090174	organelle membrane fusion	18/330	128/28891	8.3957e-15	3.79486e-12	2.55897e-12	Vamp7/Snap23/Vti1b/Rab8a/Tom1/Gosr1/Vamp3/Chmp4b/Stx11/Stx12/Vamp2/Rab8b/Gnai3/Stx8/Vps4a/Yipf4/Chmp1b2/Arl8b	18
GO:0048284	BP	GO:0048284	organelle fusion	20/330	171/28891	1.00012e-14	4.06848e-12	2.74348e-12	Vamp7/Snap23/Vti1b/Rab8a/Tom1/Gosr1/Vamp3/Chmp4b/Stx11/Bnip3/Stx12/Vamp2/Rab8b/Gnai3/Stx8/Vps4a/Yipf4/Chmp1b2/Chchd3/Arl8b	20
GO:0006897	BP	GO:0006897	endocytosis	37/330	712/28891	1.93686e-14	7.16285e-12	4.83009e-12	Hgs/Ankrd13a/Rab5a/Csnk1g3/Calr/Tgfbr2/Sdcbp/Ptprj/Itch/Rab5b/Vamp7/Abca2/Rab5c/Tyro3/Csnk1g1/Timd2/Ldlr/Lrp12/Snx3/Scarb2/Ifitm3/Grb2/Tsg101/Ezr/Vamp2/Ptprc/Il2rg/Snx12/Csnk1d/Pip4p2/Flot1/Ldlrad3/Rab21/Clcn3/Rhou/Ifng/Arl8b	37
GO:0051668	BP	GO:0051668	localization within membrane	37/330	724/28891	3.2355e-14	1.09683e-11	7.39624e-12	Hgs/Zdhhc20/Atp2c1/Hspa4/Vamp7/Snap23/Vti1b/Rab35/Fyn/Rab8a/Golga7/Erbb4/Efr3a/Snx3/Vamp3/Chmp4b/Stom/Chic2/Ezr/Stx12/Fxr1/Vamp2/Rab8b/Ptprc/Zdhhc15/Ptpn23/Snx12/Lgals9/Stx8/Flot1/Rab6b/Rftn1/Adcy6/Rab10/Vps4a/Vps37c/Cmtm6	37
GO:0019882	BP	GO:0019882	antigen processing and presentation	17/330	134/28891	2.68251e-13	8.39418e-11	5.66041e-11	H2-K1/H2-T23/Calr/Pdia3/Rab5b/H2-D1/Rab35/Rab8b/Tapbp/Ulbp1/H2-M3/Rftn1/Flt3/Rab10/Psme2/Ifng/Arl8b	17
GO:0042110	BP	GO:0042110	T cell activation	34/330	659/28891	2.91083e-13	8.45805e-11	5.70348e-11	H2-K1/Marchf7/H2-T23/Tgfbr2/Ifnar1/Cxcr4/Gja1/Itch/H2-D1/Il6st/Fyn/Wwp1/Lgals8/Ptger4/Stx11/Ptpn6/Tyk2/Ptprc/Atp7a/Ndfip1/Il2rg/Lgals9/Ccr9/Irgm1/H2-M3/Cd48/Pag1/Ncstn/Msn/Cd5/Flt3/Ifng/Cd84/Cd3d	34
GO:0033365	BP	GO:0033365	protein localization to organelle	41/330	976/28891	7.6694e-13	2.07994e-10	1.40256e-10	Hgs/Ankrd13a/Calr/Stam/Tollip/Bcap31/Bag3/Gja1/Hspa4/Vamp7/Rab35/Fyn/Rab8a/Erbb4/Srebf1/Scarb2/Macroh2a1/Cse1l/Tsg101/Chmp4b/Bnip3l/Atp6v1d/Ezr/Rpf2/Tyk2/Bcap29/Rab8b/Aurkb/Zdhhc15/Ptpn23/Csnk1d/Irgm1/Hspa1l/Rab6b/Msn/Rab10/Vps4a/Ifng/Tnpo1/Ttc21b/Vps37c	41
GO:0061025	BP	GO:0061025	membrane fusion	18/330	171/28891	1.37396e-12	3.49329e-10	2.35561e-10	Vamp7/Snap23/Vti1b/Rab8a/Tom1/Gosr1/Vamp3/Chmp4b/Stx11/Stx12/Vamp2/Rab8b/Gnai3/Stx8/Vps4a/Yipf4/Chmp1b2/Arl8b	18
GO:0098876	BP	GO:0098876	vesicle-mediated transport to the plasma membrane	17/330	155/28891	2.98048e-12	7.1321e-10	4.80936e-10	Hgs/Atp2c1/Vamp7/Snap23/Rab35/Rab8a/Golga7/Snx3/Vamp3/Chic2/Stx12/Vamp2/Rab8b/Ptpn23/Snx12/Rab10/Cmtm6	17
GO:0016197	BP	GO:0016197	endosomal transport	20/330	238/28891	5.21924e-12	1.17955e-09	7.954e-10	Hgs/Stam/Vti1b/Rab35/Rab8a/Tom1/Snx3/Gosr1/Vamp3/Chmp4b/Stx12/Rab8b/Ptpn23/Snx12/Rab6b/Rab10/Vps4a/Chmp1b2/Cmtm6/Arl8b	20
GO:0010256	BP	GO:0010256	endomembrane system organization	29/330	563/28891	1.85011e-11	3.96118e-09	2.67113e-09	Usp8/Cxcr4/Rab5b/Tmem9/Vamp7/Snap23/Vti1b/Rab5c/Naglu/Rab8a/Tom1/Ugcg/Snx3/Tmem127/Brox/Chmp4b/Stx11/Stx12/Ptprc/Slc9a8/Csnk1d/Flot1/Rab6b/Rab10/Vps4a/Ap1m1/Yipf4/Chmp1b2/Arl8b	29
GO:0002274	BP	GO:0002274	myeloid leukocyte activation	20/330	280/28891	9.91373e-11	2.01645e-08	1.35975e-08	Ifngr1/Tgfbr2/Notch2/Hspa4/Vamp7/Snap23/Naglu/Timd2/Ldlr/Stx11/Stxbp2/Crlf2/Ptpn6/Vamp2/Ulbp1/Lgals9/Irgm1/Cd48/Ifng/Cd84	20
GO:0048193	BP	GO:0048193	Golgi vesicle transport	20/330	281/28891	1.05641e-10	2.04641e-08	1.37995e-08	Bcap31/Atp2c1/Vamp7/Vti1b/Hyou1/Rab8a/Golga7/Snx3/Gosr1/Vamp3/Chic2/Bcap29/Vamp2/Rab8b/Snx12/Rab6b/Rab10/Pitpnb/Yipf4/Scfd1	20
GO:0017157	BP	GO:0017157	regulation of exocytosis	18/330	226/28891	1.48868e-10	2.7527e-08	1.85622e-08	Hgs/Rab5a/Stam/Sdcbp/Vamp7/Snap23/Rab8a/Tsg101/Stxbp2/Vamp2/Rab8b/Lgals9/Pdcd6ip/Syt13/Rab21/Vps4a/Gnai2/Cd84	18
GO:0006887	BP	GO:0006887	exocytosis	23/330	395/28891	2.27966e-10	4.03202e-08	2.7189e-08	Hgs/Rab5a/Stam/Sdcbp/Vamp7/Snap23/Rab8a/Steap3/Vamp3/Tsg101/Stx11/Stxbp2/Vamp2/Rab8b/Lgals9/Pdcd6ip/Syt13/Rab10/Rab21/Vps4a/Gnai2/Cd84/Arl8b	23
GO:0016032	BP	GO:0016032	viral process	21/330	329/28891	2.67682e-10	4.53721e-08	3.05956e-08	Zdhhc20/Cxcr4/Psmc3/Tmprss11e/Tyro3/Bst2/Top2b/Snx3/Ifitm3/Tsg101/Ifitm2/Chmp4b/Stom/Trim32/Pdcd6ip/Ddx56/Vps4a/Mvb12b/Ifng/Igf2r/Arl8b	21
GO:0032880	BP	GO:0032880	regulation of protein localization	37/330	995/28891	3.44546e-10	5.49614e-08	3.70619e-08	Usp8/Ankrd13a/Bcap31/Atp2c1/Bag3/Gja1/Vamp7/Abca2/Vti1b/Fyn/Rab8a/Erbb4/Ndfip2/Srebf1/Tm7sf3/Snx3/Anp32b/Ptger4/Gna11/Macroh2a1/Tsg101/Stom/Bnip3l/Ezr/Tyk2/Vamp2/Kcnn4/Ndfip1/Ptpn23/Snx12/Stx8/Cpt1a/Hspa1l/Msn/Vps4a/Ifng/Scfd1	37
GO:0051640	BP	GO:0051640	organelle localization	29/330	638/28891	3.51989e-10	5.49614e-08	3.70619e-08	Hgs/Stam/Sdcbp/Vamp7/Snap23/Naglu/Rab8a/Steap3/Tsg101/Enkd1/Chmp4b/Stx11/Stxbp2/Stard3/Ezr/Stx12/Vamp2/Rab8b/Aurkb/Stx8/Rnf13/Pdcd6ip/Stard3nl/Tmem106b/Tacc2/Vps4a/Ccnb1/Cd84/Arl8b	29
GO:0007032	BP	GO:0007032	endosome organization	11/330	69/28891	3.69717e-10	5.49614e-08	3.70619e-08	Usp8/Rab5b/Tmem9/Rab5c/Tom1/Snx3/Tmem127/Chmp4b/Stx12/Vps4a/Chmp1b2	11
GO:0042098	BP	GO:0042098	T cell proliferation	19/330	270/28891	3.78298e-10	5.49614e-08	3.70619e-08	H2-K1/Marchf7/H2-T23/Tgfbr2/Cxcr4/Gja1/Itch/H2-D1/Il6st/Fyn/Ptpn6/Tyk2/Ptprc/Ndfip1/Lgals9/Irgm1/Ncstn/Msn/Ifng	19
GO:0001817	BP	GO:0001817	regulation of cytokine production	34/330	861/28891	4.0534e-10	5.49641e-08	3.70637e-08	H2-K1/Lrrfip2/H2-T23/Ifngr1/Ifnar1/Ptprj/H2-D1/Il17ra/Bst2/Atp2b1/Tnfrsf8/Ptger4/Crlf2/Ptpn6/Ezr/Trim32/Fxr1/Hmgb2/Tyk2/Ptprc/Ulbp1/Ndfip1/Lgals9/Irgm1/Flot1/H2-M3/Ddx56/Rftn1/Flt3/Mcoln2/Ifng/Sigirr/Litaf/Cd84	34
GO:0019725	BP	GO:0019725	cellular homeostasis	34/330	861/28891	4.0534e-10	5.49641e-08	3.70637e-08	Bcap31/Cnnm4/Atp2c1/Bag3/Abcb6/Ftl1/Tmem9/Abca2/Naglu/Tyro3/Atp6v0a2/Atp6v1e1/Steap3/Atp2b1/Atp6v0d1/Atp6v1b2/Fth1/Atp6v1a/Ptpn6/Bnip3/Atp6v1d/Trim32/Ptprc/Atp7a/Kcnn4/Slc9a8/Ndfip1/Slc9a9/Tmem106b/Clcn3/Slc12a7/Atp13a3/Ifng/Frrs1	34
GO:0032940	BP	GO:0032940	secretion by cell	36/330	969/28891	6.23256e-10	8.17872e-08	5.51513e-08	Hgs/Rab5a/Stam/Sdcbp/Gja1/Vamp7/Snap23/Rab8a/Tyro3/Steap3/Srebf1/Tm7sf3/Ptger4/Gna11/Vamp3/Tsg101/Stx11/Stxbp2/Abcc4/Acvr2a/Vamp2/Rab8b/Kcnn4/Ptpn23/Lgals9/Slc38a2/Pdcd6ip/Cpt1a/Syt13/Rab10/Rab21/Vps4a/Gnai2/Ifng/Cd84/Arl8b	36
GO:1903530	BP	GO:1903530	regulation of secretion by cell	30/330	699/28891	6.71122e-10	8.3606e-08	5.63777e-08	Hgs/Rab5a/Stam/Sdcbp/Gja1/Vamp7/Snap23/Rab8a/Srebf1/Tm7sf3/Ptger4/Gna11/Vamp3/Tsg101/Stxbp2/Acvr2a/Vamp2/Rab8b/Kcnn4/Ptpn23/Lgals9/Slc38a2/Pdcd6ip/Cpt1a/Syt13/Rab21/Vps4a/Gnai2/Ifng/Cd84	30
GO:0016188	BP	GO:0016188	synaptic vesicle maturation	8/330	28/28891	6.7822e-10	8.3606e-08	5.63777e-08	Zdhhc20/Atp6v1e1/Atp6v0d1/Atp6v1b2/Atp6v1a/Atp6v1d/Zdhhc15/Clcn3	8
GO:0055080	BP	GO:0055080	monoatomic cation homeostasis	28/330	622/28891	8.91982e-10	1.06723e-07	7.19661e-08	Bcap31/Cnnm4/Atp2c1/Abcb6/Ftl1/Tmem9/Naglu/Cnnm3/Atp6v0a2/Steap3/Atp2b1/Atp6v0d1/Atp6v1b2/Fth1/Atp6v1a/Ptpn6/Bnip3/Ptprc/Atp7a/Slc9a8/Ndfip1/Slc9a9/Tmem106b/Slc12a7/Atp13a3/Ifng/Frrs1/Nt5e	28
GO:0001816	BP	GO:0001816	cytokine production	35/330	940/28891	1.03613e-09	1.1811e-07	7.96449e-08	H2-K1/Lrrfip2/H2-T23/Ifngr1/Notch2/Ifnar1/Ptprj/H2-D1/Il17ra/Bst2/Atp2b1/Tnfrsf8/Ptger4/Crlf2/Ptpn6/Ezr/Trim32/Fxr1/Hmgb2/Tyk2/Ptprc/Ulbp1/Ndfip1/Lgals9/Irgm1/Flot1/H2-M3/Ddx56/Rftn1/Flt3/Mcoln2/Ifng/Sigirr/Litaf/Cd84	35
GO:0002694	BP	GO:0002694	regulation of leukocyte activation	29/330	669/28891	1.04523e-09	1.1811e-07	7.96449e-08	H2-K1/Marchf7/H2-T23/Tgfbr2/Itch/Hspa4/H2-D1/Il6st/Vamp7/Tyro3/Timd2/Ldlr/Lgals8/Atp11c/Stxbp2/Crlf2/Ptpn6/Tyk2/Ptprc/Ulbp1/Ndfip1/Il2rg/Lgals9/Irgm1/Pag1/Cd5/Flt3/Ifng/Cd84	29
GO:0051603	BP	GO:0051603	proteolysis involved in protein catabolic process	32/330	804/28891	1.1315e-09	1.24404e-07	8.38888e-08	Usp8/Marchf7/Calr/Stam/Tollip/Bcap31/Rnf149/Itch/Psmc3/Naglu/Wwp1/Tmem168/Ndfip2/Rspry1/Tsg101/Hsp90b1/Chmp4b/Trim32/Znrf3/Clpp/Ndfip1/Ptpn23/Csnk1d/Rnf13/Pdcd6ip/Amfr/Rnf19a/Vps4a/Hspa1a/Hspa1b/Psme2/Vps37c	32
GO:0050801	BP	GO:0050801	monoatomic ion homeostasis	28/330	633/28891	1.31587e-09	1.36275e-07	9.18936e-08	Bcap31/Cnnm4/Atp2c1/Abcb6/Ftl1/Tmem9/Naglu/Cnnm3/Atp6v0a2/Steap3/Atp2b1/Atp6v0d1/Atp6v1b2/Fth1/Atp6v1a/Ptpn6/Bnip3/Ptprc/Atp7a/Slc9a8/Ndfip1/Slc9a9/Tmem106b/Slc12a7/Atp13a3/Ifng/Frrs1/Nt5e	28
GO:0009894	BP	GO:0009894	regulation of catabolic process	36/330	997/28891	1.3311e-09	1.36275e-07	9.18936e-08	Usp8/Marchf7/Syncrip/Bcap31/Bag3/Gja1/Itch/Tmem9/Abca2/Fyn/Rab8a/Tmem168/Tom1/Srebf1/Ldlr/Snx3/Scarb2/Chmp4b/Bnip3l/Bnip3/Ezr/Trim32/Fxr1/Ndfip1/Snx12/Csnk1d/Gnai3/Irgm1/Cpt1a/Rnf19a/Msn/Hspa1a/Hspa1b/Psme2/Ifng/Scfd1	36
GO:0050865	BP	GO:0050865	regulation of cell activation	30/330	720/28891	1.33997e-09	1.36275e-07	9.18936e-08	H2-K1/Marchf7/H2-T23/Tgfbr2/Ptprj/Itch/Hspa4/H2-D1/Il6st/Vamp7/Tyro3/Timd2/Ldlr/Lgals8/Atp11c/Stxbp2/Crlf2/Ptpn6/Tyk2/Ptprc/Ulbp1/Ndfip1/Il2rg/Lgals9/Irgm1/Pag1/Cd5/Flt3/Ifng/Cd84	30
GO:0072657	BP	GO:0072657	protein localization to membrane	28/330	641/28891	1.73619e-09	1.72264e-07	1.16162e-07	Hgs/Zdhhc20/Atp2c1/Hspa4/Vamp7/Snap23/Vti1b/Fyn/Rab8a/Golga7/Erbb4/Efr3a/Vamp3/Chmp4b/Stom/Ezr/Vamp2/Rab8b/Zdhhc15/Lgals9/Stx8/Flot1/Rab6b/Rftn1/Adcy6/Rab10/Vps4a/Vps37c	28
GO:0042176	BP	GO:0042176	regulation of protein catabolic process	21/330	369/28891	2.12069e-09	2.05404e-07	1.38509e-07	Usp8/Marchf7/Bcap31/Gja1/Itch/Tmem9/Abca2/Fyn/Ldlr/Snx3/Ezr/Trim32/Ndfip1/Snx12/Csnk1d/Rnf19a/Msn/Hspa1a/Hspa1b/Psme2/Ifng	21
GO:1990182	BP	GO:1990182	exosomal secretion	7/330	21/28891	2.41281e-09	2.28263e-07	1.53924e-07	Hgs/Stam/Sdcbp/Steap3/Tsg101/Pdcd6ip/Vps4a	7
GO:0006605	BP	GO:0006605	protein targeting	19/330	303/28891	2.58888e-09	2.39354e-07	1.61402e-07	Hgs/Zdhhc20/Bcap31/Bag3/Hspa4/Vamp7/Fyn/Golga7/Srebf1/Scarb2/Chmp4b/Stom/Bnip3l/Rab8b/Zdhhc15/Irgm1/Hspa1l/Vps4a/Vps37c	19
GO:0007041	BP	GO:0007041	lysosomal transport	13/330	128/28891	2.90198e-09	2.62339e-07	1.76902e-07	Hgs/Vamp7/Scarb2/Tsg101/Chmp4b/Stx8/Tmem106b/Hgsnat/Vps4a/Hspa1a/Chmp1b2/Igf2r/Arl8b	13
GO:0072594	BP	GO:0072594	establishment of protein localization to organelle	23/330	452/28891	3.06137e-09	2.70732e-07	1.82562e-07	Hgs/Stam/Bcap31/Bag3/Hspa4/Vamp7/Srebf1/Scarb2/Macroh2a1/Cse1l/Tsg101/Chmp4b/Bnip3l/Rab8b/Zdhhc15/Ptpn23/Irgm1/Hspa1l/Rab10/Vps4a/Ifng/Tnpo1/Vps37c	23
GO:0030001	BP	GO:0030001	metal ion transport	34/330	935/28891	3.31129e-09	2.86603e-07	1.93264e-07	Cnnm4/Atp2c1/Cxcr4/Gja1/Abcb6/Fyn/Tmem168/Timd2/Ndfip2/Steap3/Atp2b1/Fth1/Snx3/Hspa2/Slc38a1/Stom/Ptpn6/Vamp2/Ptprc/Atp7a/Kcnn4/Slc9a8/Ndfip1/Trpv2/Slc38a2/Slc9a9/Mcoln2/Slc20a1/Gnai2/Slc12a7/Kcnq5/Ifng/Abcc5/Cd84	34
GO:0097734	BP	GO:0097734	extracellular exosome biogenesis	7/330	22/28891	3.50423e-09	2.96983e-07	2.00264e-07	Hgs/Stam/Sdcbp/Steap3/Tsg101/Pdcd6ip/Vps4a	7
GO:0032386	BP	GO:0032386	regulation of intracellular transport	20/330	346/28891	3.96429e-09	3.29117e-07	2.21932e-07	Bcap31/Bag3/Vamp7/Abca2/Fyn/Srebf1/Snx3/Anp32b/Stom/Bnip3l/Ezr/Vamp2/Ptpn23/Snx12/Hspa1l/Msn/Rab21/Ifng/Ttc21b/Scfd1	20
GO:0046651	BP	GO:0046651	lymphocyte proliferation	21/330	383/28891	4.10078e-09	3.3364e-07	2.24982e-07	H2-K1/Marchf7/H2-T23/Tgfbr2/Cxcr4/Gja1/Itch/H2-D1/Il6st/Fyn/Ptpn6/Tyk2/Ptprc/Ndfip1/Lgals9/Irgm1/Ncstn/Msn/Flt3/Ifng/Il9r	21
GO:0030003	BP	GO:0030003	intracellular monoatomic cation homeostasis	25/330	543/28891	4.70286e-09	3.75122e-07	2.52955e-07	Bcap31/Cnnm4/Atp2c1/Abcb6/Ftl1/Tmem9/Naglu/Atp6v0a2/Steap3/Atp2b1/Atp6v0d1/Atp6v1b2/Fth1/Atp6v1a/Ptpn6/Bnip3/Ptprc/Atp7a/Slc9a8/Ndfip1/Slc9a9/Tmem106b/Atp13a3/Ifng/Frrs1	25
GO:0051223	BP	GO:0051223	regulation of protein transport	26/330	586/28891	4.91519e-09	3.84519e-07	2.59291e-07	Bcap31/Atp2c1/Bag3/Gja1/Vamp7/Fyn/Rab8a/Ndfip2/Srebf1/Tm7sf3/Snx3/Anp32b/Ptger4/Gna11/Tsg101/Stom/Bnip3l/Vamp2/Kcnn4/Ndfip1/Ptpn23/Snx12/Cpt1a/Hspa1l/Ifng/Scfd1	26
GO:0032943	BP	GO:0032943	mononuclear cell proliferation	21/330	389/28891	5.39025e-09	4.13727e-07	2.78987e-07	H2-K1/Marchf7/H2-T23/Tgfbr2/Cxcr4/Gja1/Itch/H2-D1/Il6st/Fyn/Ptpn6/Tyk2/Ptprc/Ndfip1/Lgals9/Irgm1/Ncstn/Msn/Flt3/Ifng/Il9r	21
GO:0140112	BP	GO:0140112	extracellular vesicle biogenesis	7/330	24/28891	6.97331e-09	5.18666e-07	3.4975e-07	Hgs/Stam/Sdcbp/Steap3/Tsg101/Pdcd6ip/Vps4a	7
GO:0006873	BP	GO:0006873	intracellular monoatomic ion homeostasis	25/330	554/28891	7.01245e-09	5.18666e-07	3.4975e-07	Bcap31/Cnnm4/Atp2c1/Abcb6/Ftl1/Tmem9/Naglu/Atp6v0a2/Steap3/Atp2b1/Atp6v0d1/Atp6v1b2/Fth1/Atp6v1a/Ptpn6/Bnip3/Ptprc/Atp7a/Slc9a8/Ndfip1/Slc9a9/Tmem106b/Atp13a3/Ifng/Frrs1	25
GO:0051046	BP	GO:0051046	regulation of secretion	30/330	778/28891	7.91164e-09	5.74724e-07	3.87551e-07	Hgs/Rab5a/Stam/Sdcbp/Gja1/Vamp7/Snap23/Rab8a/Srebf1/Tm7sf3/Ptger4/Gna11/Vamp3/Tsg101/Stxbp2/Acvr2a/Vamp2/Rab8b/Kcnn4/Ptpn23/Lgals9/Slc38a2/Pdcd6ip/Cpt1a/Syt13/Rab21/Vps4a/Gnai2/Ifng/Cd84	30
GO:1903543	BP	GO:1903543	positive regulation of exosomal secretion	6/330	15/28891	9.73983e-09	6.95116e-07	4.68735e-07	Hgs/Stam/Sdcbp/Tsg101/Pdcd6ip/Vps4a	6
GO:0006879	BP	GO:0006879	intracellular iron ion homeostasis	10/330	74/28891	1.24129e-08	8.55856e-07	5.77126e-07	Ftl1/Naglu/Atp6v0a2/Steap3/Atp6v0d1/Fth1/Atp6v1a/Ndfip1/Ifng/Frrs1	10
GO:0046640	BP	GO:0046640	regulation of alpha-beta T cell proliferation	10/330	74/28891	1.24129e-08	8.55856e-07	5.77126e-07	H2-K1/H2-T23/Tgfbr2/Itch/H2-D1/Tyk2/Ptprc/Ndfip1/Lgals9/Irgm1	10
GO:0070201	BP	GO:0070201	regulation of establishment of protein localization	26/330	615/28891	1.31556e-08	8.91948e-07	6.01464e-07	Bcap31/Atp2c1/Bag3/Gja1/Vamp7/Fyn/Rab8a/Ndfip2/Srebf1/Tm7sf3/Snx3/Anp32b/Ptger4/Gna11/Tsg101/Stom/Bnip3l/Vamp2/Kcnn4/Ndfip1/Ptpn23/Snx12/Cpt1a/Hspa1l/Ifng/Scfd1	26
GO:0019221	BP	GO:0019221	cytokine-mediated signaling pathway	22/330	450/28891	1.39774e-08	9.32131e-07	6.2856e-07	Ifngr1/Tollip/Ifnar1/Cxcr4/Il6st/Il17ra/Cdip1/Ugcg/Ifitm3/Ifitm2/Crlf2/Ptpn6/Trim32/Wbp1l/Tyk2/Ptprc/Il2rg/Irgm1/Flt3/Ifng/Sigirr/Il9r	22
GO:0090150	BP	GO:0090150	establishment of protein localization to membrane	17/330	270/28891	1.69895e-08	1.11473e-06	7.51692e-07	Zdhhc20/Atp2c1/Hspa4/Vamp7/Snap23/Fyn/Rab8a/Golga7/Vamp3/Chmp4b/Stom/Vamp2/Rab8b/Zdhhc15/Rftn1/Rab10/Vps37c	17
GO:0006511	BP	GO:0006511	ubiquitin-dependent protein catabolic process	27/330	668/28891	1.74466e-08	1.12655e-06	7.59665e-07	Usp8/Calr/Stam/Tollip/Bcap31/Rnf149/Itch/Psmc3/Naglu/Wwp1/Tmem168/Ndfip2/Tsg101/Hsp90b1/Chmp4b/Trim32/Znrf3/Ndfip1/Ptpn23/Csnk1d/Rnf13/Amfr/Rnf19a/Vps4a/Hspa1a/Hspa1b/Vps37c	27
GO:0001819	BP	GO:0001819	positive regulation of cytokine production	24/330	546/28891	2.33234e-08	1.45884e-06	9.83731e-07	H2-K1/Lrrfip2/H2-T23/Ifngr1/Ifnar1/Ptprj/H2-D1/Il17ra/Tnfrsf8/Ptger4/Crlf2/Trim32/Hmgb2/Tyk2/Ptprc/Ulbp1/Lgals9/Flot1/H2-M3/Rftn1/Flt3/Mcoln2/Ifng/Cd84	24
GO:1903541	BP	GO:1903541	regulation of exosomal secretion	6/330	17/28891	2.36238e-08	1.45884e-06	9.83731e-07	Hgs/Stam/Sdcbp/Tsg101/Pdcd6ip/Vps4a	6
GO:0046633	BP	GO:0046633	alpha-beta T cell proliferation	10/330	79/28891	2.36684e-08	1.45884e-06	9.83731e-07	H2-K1/H2-T23/Tgfbr2/Itch/H2-D1/Tyk2/Ptprc/Ndfip1/Lgals9/Irgm1	10
GO:0002252	BP	GO:0002252	immune effector process	31/330	866/28891	2.43414e-08	1.47792e-06	9.96602e-07	H2-K1/H2-T23/Notch2/Ptprj/H2-D1/Vamp7/Snap23/Bst2/Ighv1-66/Itm2a/Lgals8/Ptger4/Stx11/Stxbp2/Crlf2/Ptpn6/Vamp2/Ptprc/Atp7a/Ulbp1/Ndfip1/Ighv1-19/Ighv1-36/Lgals9/H2-M3/Rftn1/Ifng/Il9r/Litaf/Cd84/Arl8b	31
GO:0070661	BP	GO:0070661	leukocyte proliferation	21/330	425/28891	2.50255e-08	1.48444e-06	1.001e-06	H2-K1/Marchf7/H2-T23/Tgfbr2/Cxcr4/Gja1/Itch/H2-D1/Il6st/Fyn/Ptpn6/Tyk2/Ptprc/Ndfip1/Lgals9/Irgm1/Ncstn/Msn/Flt3/Ifng/Il9r	21
GO:0019941	BP	GO:0019941	modification-dependent protein catabolic process	27/330	680/28891	2.51786e-08	1.48444e-06	1.001e-06	Usp8/Calr/Stam/Tollip/Bcap31/Rnf149/Itch/Psmc3/Naglu/Wwp1/Tmem168/Ndfip2/Tsg101/Hsp90b1/Chmp4b/Trim32/Znrf3/Ndfip1/Ptpn23/Csnk1d/Rnf13/Amfr/Rnf19a/Vps4a/Hspa1a/Hspa1b/Vps37c	27
GO:0032680	BP	GO:0032680	regulation of tumor necrosis factor production	15/330	216/28891	3.27788e-08	1.89027e-06	1.27466e-06	H2-K1/Lrrfip2/H2-T23/Ifngr1/Ptprj/H2-D1/Tnfrsf8/Ptger4/Ptpn6/Fxr1/Ptprc/Lgals9/Flt3/Ifng/Cd84	15
GO:0045022	BP	GO:0045022	early endosome to late endosome transport	8/330	44/28891	3.29914e-08	1.89027e-06	1.27466e-06	Rab5a/Snx3/Ezr/Ptpn23/Snx12/Stx8/Msn/Rab21	8
GO:0043632	BP	GO:0043632	modification-dependent macromolecule catabolic process	27/330	690/28891	3.39536e-08	1.91838e-06	1.29361e-06	Usp8/Calr/Stam/Tollip/Bcap31/Rnf149/Itch/Psmc3/Naglu/Wwp1/Tmem168/Ndfip2/Tsg101/Hsp90b1/Chmp4b/Trim32/Znrf3/Ndfip1/Ptpn23/Csnk1d/Rnf13/Amfr/Rnf19a/Vps4a/Hspa1a/Hspa1b/Vps37c	27
GO:0097401	BP	GO:0097401	synaptic vesicle lumen acidification	6/330	18/28891	3.50957e-08	1.95574e-06	1.31881e-06	Atp6v1e1/Atp6v0d1/Atp6v1b2/Atp6v1a/Atp6v1d/Clcn3	6
GO:1903555	BP	GO:1903555	regulation of tumor necrosis factor superfamily cytokine production	15/330	219/28891	3.93659e-08	2.16406e-06	1.45928e-06	H2-K1/Lrrfip2/H2-T23/Ifngr1/Ptprj/H2-D1/Tnfrsf8/Ptger4/Ptpn6/Fxr1/Ptprc/Lgals9/Flt3/Ifng/Cd84	15
GO:0002683	BP	GO:0002683	negative regulation of immune system process	24/330	565/28891	4.43577e-08	2.37671e-06	1.60268e-06	H2-K1/Marchf7/Tmem176b/H2-T23/Ptprj/Itch/H2-D1/Tyro3/Bst2/Ldlr/Ptger4/Pdcd1/Ptpn6/Ezr/Gcsam/Ptprc/Aurkb/Ndfip1/Lgals9/Irgm1/Pag1/Flt3/Ifng/Cd84	24
GO:0046631	BP	GO:0046631	alpha-beta T cell activation	15/330	221/28891	4.44027e-08	2.37671e-06	1.60268e-06	H2-K1/H2-T23/Tgfbr2/Itch/H2-D1/Ptger4/Tyk2/Ptprc/Atp7a/Ndfip1/Il2rg/Lgals9/Irgm1/H2-M3/Ifng	15
GO:0015748	BP	GO:0015748	organophosphate ester transport	12/330	133/28891	4.51005e-08	2.38271e-06	1.60672e-06	Gja1/Abcb1b/Ldlr/Scarb2/Atp11c/Abcc4/Kcnn4/Atp8a1/Abcc1/Pitpnb/Lrrc8c/Abcc5	12
GO:0032640	BP	GO:0032640	tumor necrosis factor production	15/330	223/28891	5.00185e-08	2.60865e-06	1.75908e-06	H2-K1/Lrrfip2/H2-T23/Ifngr1/Ptprj/H2-D1/Tnfrsf8/Ptger4/Ptpn6/Fxr1/Ptprc/Lgals9/Flt3/Ifng/Cd84	15
GO:2000641	BP	GO:2000641	regulation of early endosome to late endosome transport	6/330	19/28891	5.08015e-08	2.61596e-06	1.76401e-06	Snx3/Ezr/Ptpn23/Snx12/Msn/Rab21	6
GO:0030098	BP	GO:0030098	lymphocyte differentiation	22/330	486/28891	5.45468e-08	2.7737e-06	1.87038e-06	Tgfbr2/Notch2/Ptprj/Tyro3/Wwp1/Top2b/Itm2a/Lgals8/Ptger4/Atp11c/Ptpn6/Ptprc/Atp7a/Ndfip1/Il2rg/Igkc/Lgals9/Ccr9/Flt3/Ifng/Il9r/Cd3d	22
GO:1903131	BP	GO:1903131	mononuclear cell differentiation	23/330	530/28891	5.81015e-08	2.91798e-06	1.96767e-06	Tmem176b/Tgfbr2/Notch2/Ptprj/Tyro3/Wwp1/Top2b/Itm2a/Lgals8/Ptger4/Atp11c/Ptpn6/Ptprc/Atp7a/Ndfip1/Il2rg/Igkc/Lgals9/Ccr9/Flt3/Ifng/Il9r/Cd3d	23
GO:0071706	BP	GO:0071706	tumor necrosis factor superfamily cytokine production	15/330	226/28891	5.96577e-08	2.9596e-06	1.99574e-06	H2-K1/Lrrfip2/H2-T23/Ifngr1/Ptprj/H2-D1/Tnfrsf8/Ptger4/Ptpn6/Fxr1/Ptprc/Lgals9/Flt3/Ifng/Cd84	15
GO:0098927	BP	GO:0098927	vesicle-mediated transport between endosomal compartments	8/330	48/28891	6.75093e-08	3.30877e-06	2.23119e-06	Rab5a/Snx3/Ezr/Ptpn23/Snx12/Stx8/Msn/Rab21	8
GO:0016482	BP	GO:0016482	cytosolic transport	13/330	170/28891	8.87047e-08	4.29584e-06	2.8968e-06	Rab5a/Vti1b/Snx3/Gosr1/Vamp3/Ezr/Ptpn23/Snx12/Stx8/Rab6b/Msn/Rab21/Arl8b	13
GO:0006914	BP	GO:0006914	autophagy	22/330	503/28891	9.91769e-08	4.6913e-06	3.16346e-06	Calr/Tollip/Bag3/Vti1b/Naglu/Rab8a/Tom1/Srebf1/Lgals8/Chmp4b/Bnip3l/Bnip3/Trim32/Stx12/Gnai3/Irgm1/Pdcd6ip/Vps4a/Ifng/Scfd1/Cd84/Arl8b	22
GO:0061919	BP	GO:0061919	process utilizing autophagic mechanism	22/330	503/28891	9.91769e-08	4.6913e-06	3.16346e-06	Calr/Tollip/Bag3/Vti1b/Naglu/Rab8a/Tom1/Srebf1/Lgals8/Chmp4b/Bnip3l/Bnip3/Trim32/Stx12/Gnai3/Irgm1/Pdcd6ip/Vps4a/Ifng/Scfd1/Cd84/Arl8b	22
GO:0009896	BP	GO:0009896	positive regulation of catabolic process	23/330	550/28891	1.12844e-07	5.27643e-06	3.55804e-06	Syncrip/Bcap31/Bag3/Gja1/Itch/Abca2/Tom1/Ldlr/Bnip3l/Bnip3/Ezr/Trim32/Fxr1/Ndfip1/Csnk1d/Gnai3/Irgm1/Cpt1a/Rnf19a/Msn/Hspa1a/Hspa1b/Ifng	23
GO:0098662	BP	GO:0098662	inorganic cation transmembrane transport	28/330	782/28891	1.18978e-07	5.50004e-06	3.70882e-06	Atp2c1/Abcb6/Fyn/Tmem168/Atp6v0a2/Atp6v1e1/Steap3/Atp2b1/Atp6v0d1/Atp6v1b2/Hspa2/Atp6v1a/Stom/Ptpn6/Atp6v1d/Vamp2/Ptprc/Atp7a/Kcnn4/Slc9a8/Trpv2/Slc9a9/Clcn3/Mcoln2/Slc12a7/Kcnq5/Ifng/Abcc5	28
GO:0046634	BP	GO:0046634	regulation of alpha-beta T cell activation	12/330	146/28891	1.26791e-07	5.79535e-06	3.90795e-06	H2-K1/H2-T23/Tgfbr2/Itch/H2-D1/Tyk2/Ptprc/Ndfip1/Il2rg/Lgals9/Irgm1/Ifng	12
GO:0045732	BP	GO:0045732	positive regulation of protein catabolic process	14/330	208/28891	1.39068e-07	6.17977e-06	4.16718e-06	Bcap31/Gja1/Itch/Abca2/Ldlr/Ezr/Trim32/Ndfip1/Csnk1d/Rnf19a/Msn/Hspa1a/Hspa1b/Ifng	14
GO:0009615	BP	GO:0009615	response to virus	19/330	389/28891	1.40135e-07	6.17977e-06	4.16718e-06	Ifngr1/Ifnar1/Itch/Il17ra/Bst2/Dhx15/Lgals8/Ifitm3/Ifitm2/Rps15a/Bnip3l/Bnip3/Trim32/Ptprc/Lgals9/Irgm1/Ddx56/Flt3/Ifng	19
GO:0070925	BP	GO:0070925	organelle assembly	32/330	988/28891	1.41187e-07	6.17977e-06	4.16718e-06	Stam/Sdcbp/Bag3/Abcb6/Rab8a/Tom1/Tsg101/Enkd1/Chmp4b/Abcc4/Atp6v1d/Ezr/Rpf2/Stx12/Fxr1/Aurkb/Slc9a8/Ptpn23/Ablim1/Csnk1d/Irgm1/Pdcd6ip/Msn/Ccdc69/Vps4a/Hspa1a/Hspa1b/Ap1m1/Ttc21b/Chmp1b2/Scfd1/Arl8b	32
GO:0098771	BP	GO:0098771	inorganic ion homeostasis	23/330	557/28891	1.41278e-07	6.17977e-06	4.16718e-06	Bcap31/Cnnm4/Atp2c1/Abcb6/Ftl1/Naglu/Cnnm3/Atp6v0a2/Steap3/Atp2b1/Atp6v0d1/Fth1/Atp6v1a/Ptpn6/Bnip3/Ptprc/Atp7a/Ndfip1/Slc12a7/Atp13a3/Ifng/Frrs1/Nt5e	23
GO:0070050	BP	GO:0070050	neuron cellular homeostasis	9/330	73/28891	1.51664e-07	6.5491e-06	4.41623e-06	Tyro3/Atp6v1e1/Atp6v0d1/Atp6v1b2/Atp6v1a/Atp6v1d/Atp7a/Tmem106b/Clcn3	9
GO:0098655	BP	GO:0098655	monoatomic cation transmembrane transport	28/330	792/28891	1.54179e-07	6.5491e-06	4.41623e-06	Atp2c1/Abcb6/Fyn/Tmem168/Atp6v0a2/Atp6v1e1/Steap3/Atp2b1/Atp6v0d1/Atp6v1b2/Hspa2/Atp6v1a/Stom/Ptpn6/Atp6v1d/Vamp2/Ptprc/Atp7a/Kcnn4/Slc9a8/Trpv2/Slc9a9/Clcn3/Mcoln2/Slc12a7/Kcnq5/Ifng/Abcc5	28
GO:0030155	BP	GO:0030155	regulation of cell adhesion	29/330	841/28891	1.54551e-07	6.5491e-06	4.41623e-06	H2-K1/Marchf7/H2-T23/Calr/Tgfbr2/Ptpra/Ptprj/Cxcr4/Itch/H2-D1/Il6st/Sema6a/Ddr1/Lgals8/Ptger4/Ptpn6/Tyk2/Spint2/Ptprc/Ndfip1/Il2rg/Ptpn23/Lgals9/Irgm1/Flot1/Pag1/Cd5/Ifng/Spry4	29
GO:0034341	BP	GO:0034341	response to type II interferon	12/330	150/28891	1.70534e-07	7.1244e-06	4.80417e-06	Syncrip/Ifngr1/Bst2/Ifitm3/Vamp3/Ifitm2/Stx11/Stxbp2/Tyk2/Stx8/Irgm1/Ifng	12
GO:0002443	BP	GO:0002443	leukocyte mediated immunity	24/330	608/28891	1.7163e-07	7.1244e-06	4.80417e-06	H2-K1/H2-T23/H2-D1/Vamp7/Snap23/Bst2/Ighv1-66/Stx11/Stxbp2/Crlf2/Ptpn6/Vamp2/Ptprc/Ulbp1/Ndfip1/Ighv1-19/Ighv1-36/Lgals9/H2-M3/Rftn1/Ifng/Il9r/Cd84/Arl8b	24
GO:0098660	BP	GO:0098660	inorganic ion transmembrane transport	29/330	852/28891	2.0248e-07	8.32009e-06	5.61045e-06	Atp2c1/Abcb6/Fyn/Tmem168/Atp6v0a2/Atp6v1e1/Steap3/Atp2b1/Atp6v0d1/Atp6v1b2/Hspa2/Atp6v1a/Stom/Ptpn6/Atp6v1d/Vamp2/Ptprc/Atp7a/Kcnn4/Slc9a8/Trpv2/Slc9a9/Clcn3/Mcoln2/Slc20a1/Slc12a7/Kcnq5/Ifng/Abcc5	29
GO:0055082	BP	GO:0055082	intracellular chemical homeostasis	27/330	755/28891	2.06815e-07	8.41324e-06	5.67326e-06	Bcap31/Cnnm4/Atp2c1/Abcb6/Ftl1/Tmem9/Abca2/Naglu/Atp6v0a2/Steap3/Atp2b1/Atp6v0d1/Atp6v1b2/Fth1/Atp6v1a/Ptpn6/Bnip3/Ptprc/Atp7a/Slc9a8/Ndfip1/Slc9a9/Tmem106b/Slc12a7/Atp13a3/Ifng/Frrs1	27
GO:0019058	BP	GO:0019058	viral life cycle	15/330	250/28891	2.2209e-07	8.94517e-06	6.03196e-06	Tmprss11e/Tyro3/Bst2/Top2b/Snx3/Ifitm3/Tsg101/Ifitm2/Chmp4b/Stom/Pdcd6ip/Ddx56/Vps4a/Mvb12b/Arl8b	15
GO:0034220	BP	GO:0034220	monoatomic ion transmembrane transport	30/330	909/28891	2.3842e-07	9.50876e-06	6.41201e-06	Atp2c1/Abcb1b/Abcb6/Fyn/Tmem168/Atp6v0a2/Atp6v1e1/Steap3/Atp2b1/Atp6v0d1/Atp6v1b2/Hspa2/Atp6v1a/Stom/Ptpn6/Atp6v1d/Vamp2/Ptprc/Atp7a/Kcnn4/Slc9a8/Trpv2/Slc9a9/Clcn3/Mcoln2/Slc12a7/Kcnq5/Ifng/Lrrc8c/Abcc5	30
GO:0007159	BP	GO:0007159	leukocyte cell-cell adhesion	20/330	447/28891	2.67249e-07	1.0555e-05	7.11753e-06	H2-K1/Marchf7/H2-T23/Tgfbr2/Itch/H2-D1/Il6st/Lgals8/Ptpn6/Tyk2/Ptprc/Ndfip1/Il2rg/Lgals9/Irgm1/Pag1/Msn/Cd5/Ifng/Nt5e	20
GO:0002474	BP	GO:0002474	antigen processing and presentation of peptide antigen via MHC class I	8/330	58/28891	3.10553e-07	1.21474e-05	8.19131e-06	H2-K1/H2-T23/Calr/Pdia3/H2-D1/Tapbp/Ulbp1/H2-M3	8
GO:0050867	BP	GO:0050867	positive regulation of cell activation	20/330	454/28891	3.41599e-07	1.30716e-05	8.81449e-06	H2-K1/H2-T23/Tgfbr2/Ptprj/H2-D1/Il6st/Vamp7/Timd2/Lgals8/Atp11c/Stxbp2/Crlf2/Tyk2/Ptprc/Ulbp1/Il2rg/Lgals9/Irgm1/Cd5/Ifng	20
GO:0042983	BP	GO:0042983	amyloid precursor protein biosynthetic process	5/330	14/28891	3.47029e-07	1.30716e-05	8.81449e-06	Abca2/Itm2b/Itm2a/Ncstn/Itm2c	5
GO:0042984	BP	GO:0042984	regulation of amyloid precursor protein biosynthetic process	5/330	14/28891	3.47029e-07	1.30716e-05	8.81449e-06	Abca2/Itm2b/Itm2a/Ncstn/Itm2c	5
GO:0002366	BP	GO:0002366	leukocyte activation involved in immune response	17/330	333/28891	3.47032e-07	1.30716e-05	8.81449e-06	Notch2/Vamp7/Snap23/Itm2a/Lgals8/Ptger4/Stx11/Stxbp2/Ptpn6/Vamp2/Ptprc/Atp7a/Ndfip1/Lgals9/H2-M3/Ifng/Cd84	17
GO:0002250	BP	GO:0002250	adaptive immune response	24/330	636/28891	3.86838e-07	1.44372e-05	9.7354e-06	H2-K1/H2-T23/H2-D1/Il17ra/Fyn/Ighv1-66/Pdcd1/Stx11/Crlf2/Ptpn6/Tyk2/Ptprc/Ulbp1/Ndfip1/Ighv1-19/Ighv1-36/H2-M3/Pag1/Rftn1/Mcoln2/Ifng/Il9r/Cd84/Cd3d	24
GO:0042129	BP	GO:0042129	regulation of T cell proliferation	14/330	227/28891	4.04518e-07	1.46306e-05	9.86578e-06	H2-K1/Marchf7/H2-T23/Tgfbr2/Itch/H2-D1/Il6st/Ptpn6/Tyk2/Ptprc/Ndfip1/Lgals9/Irgm1/Ifng	14
GO:0060284	BP	GO:0060284	regulation of cell development	31/330	984/28891	4.0598e-07	1.46306e-05	9.86578e-06	Prmt1/Tmem176b/Bmpr2/Tgfbr2/Notch2/Ptpra/Cxcr4/Gja1/Il6st/Vamp7/Sema6a/Ldlr/Acvr1b/Atp11c/Cdc73/Ptpn6/Trim32/Acvr2a/Fxr1/Hmgb2/Ptprc/Ndfip1/Il2rg/Trpv2/Lgals9/Irgm1/Rbfox2/Ctdsp1/Flt3/Rab21/Ifng	31
GO:0006826	BP	GO:0006826	iron ion transport	8/330	60/28891	4.06405e-07	1.46306e-05	9.86578e-06	Abcb6/Timd2/Steap3/Fth1/Snx3/Atp7a/Ifng/Abcc5	8
GO:0072666	BP	GO:0072666	establishment of protein localization to vacuole	8/330	60/28891	4.06405e-07	1.46306e-05	9.86578e-06	Hgs/Stam/Vamp7/Scarb2/Ptpn23/Irgm1/Vps4a/Vps37c	8
GO:0002263	BP	GO:0002263	cell activation involved in immune response	17/330	337/28891	4.10071e-07	1.46331e-05	9.86746e-06	Notch2/Vamp7/Snap23/Itm2a/Lgals8/Ptger4/Stx11/Stxbp2/Ptpn6/Vamp2/Ptprc/Atp7a/Ndfip1/Lgals9/H2-M3/Ifng/Cd84	17
GO:0044403	BP	GO:0044403	biological process involved in symbiotic interaction	15/330	264/28891	4.45925e-07	1.57741e-05	1.06369e-05	Zdhhc20/Rab5a/Psmc3/Tmprss11e/Snx3/Ifitm3/Tsg101/Ifitm2/Chmp4b/Stom/Ddx56/Vps4a/Ifng/Igf2r/Arl8b	15
GO:0008285	BP	GO:0008285	negative regulation of cell population proliferation	30/330	938/28891	4.60883e-07	1.61627e-05	1.08989e-05	H2-K1/Marchf7/Bmpr2/Tgfbr2/Tgfbr1/Prkcsh/Ptprj/Gja1/Itch/H2-D1/Sema6a/Fyn/Erbb4/Ddr1/Fth1/Tmem127/Ifitm3/Tsg101/Cdc73/Ptpn6/Trim32/Spint2/Ndfip1/Trpv2/Lgals9/Irgm1/Adcy6/Flt3/Itm2c/Ifng	30
GO:0040008	BP	GO:0040008	regulation of growth	25/330	691/28891	4.79115e-07	1.66585e-05	1.12332e-05	Bmpr2/Tgfbr2/Sdcbp/Tgfbr1/Ptprj/Cxcr4/Gja1/Sema6a/Rbbp7/Erbb4/Ddr1/Bst2/Acvr1b/Ptger4/Tsg101/Atrn/Cdc73/Ezr/Trim32/Trpv2/Rftn1/Flt3/Rab21/Ccnb1/Il9r	25
GO:0051249	BP	GO:0051249	regulation of lymphocyte activation	22/330	555/28891	5.28393e-07	1.82161e-05	1.22836e-05	H2-K1/Marchf7/H2-T23/Tgfbr2/Itch/H2-D1/Il6st/Tyro3/Lgals8/Atp11c/Ptpn6/Tyk2/Ptprc/Ulbp1/Ndfip1/Il2rg/Lgals9/Irgm1/Pag1/Cd5/Flt3/Ifng	22
GO:0016236	BP	GO:0016236	macroautophagy	15/330	268/28891	5.39648e-07	1.84478e-05	1.24398e-05	Calr/Bag3/Vti1b/Tom1/Lgals8/Chmp4b/Bnip3l/Bnip3/Stx12/Gnai3/Irgm1/Pdcd6ip/Vps4a/Scfd1/Arl8b	15
GO:0006954	BP	GO:0006954	inflammatory response	28/330	846/28891	5.78505e-07	1.96113e-05	1.32244e-05	H2-K1/H2-T23/Ifngr1/Notch2/Tollip/Gja1/Hspa4/H2-D1/Vamp7/Snap23/Il17ra/Naglu/Tyro3/Ldlr/Acvr1/Ptger4/Atrn/Crlf2/Ptpn6/Fxr1/Hmgb2/Ndfip1/Lgals9/Irgm1/Abcc1/Ifng/Sigirr/Nt5e	28
GO:0031347	BP	GO:0031347	regulation of defense response	28/330	847/28891	5.92157e-07	1.99082e-05	1.34246e-05	H2-K1/Lrrfip2/H2-T23/Gja1/Itch/Hspa4/H2-D1/Vamp7/Il17ra/Naglu/Tyro3/Srebf1/Ldlr/Ptger4/Ptpn6/Fxr1/Hmgb2/Aurkb/Ulbp1/Ndfip1/Lgals9/Irgm1/Flot1/H2-M3/Abcc1/Rftn1/Ifng/Nt5e	28
GO:0006898	BP	GO:0006898	receptor-mediated endocytosis	15/330	272/28891	6.50772e-07	2.16995e-05	1.46325e-05	Hgs/Ankrd13a/Rab5a/Tgfbr2/Sdcbp/Itch/Abca2/Ldlr/Scarb2/Ifitm3/Grb2/Ezr/Flot1/Ldlrad3/Rab21	15
GO:0002696	BP	GO:0002696	positive regulation of leukocyte activation	19/330	432/28891	6.90455e-07	2.28355e-05	1.53986e-05	H2-K1/H2-T23/Tgfbr2/H2-D1/Il6st/Vamp7/Timd2/Lgals8/Atp11c/Stxbp2/Crlf2/Tyk2/Ptprc/Ulbp1/Il2rg/Lgals9/Irgm1/Cd5/Ifng	19
GO:0031349	BP	GO:0031349	positive regulation of defense response	21/330	520/28891	7.14137e-07	2.34283e-05	1.57983e-05	H2-K1/Lrrfip2/H2-T23/Gja1/H2-D1/Vamp7/Il17ra/Naglu/Tyro3/Srebf1/Ldlr/Ptger4/Hmgb2/Ulbp1/Lgals9/Irgm1/Flot1/H2-M3/Abcc1/Rftn1/Ifng	21
GO:0098609	BP	GO:0098609	cell-cell adhesion	29/330	908/28891	7.43e-07	2.41802e-05	1.63053e-05	H2-K1/Marchf7/H2-T23/Tgfbr2/Atp2c1/Pdia3/Itch/H2-D1/Il6st/Tyro3/Efr3a/Adgrl3/Acvr1/Lgals8/Ptpn6/Tyk2/Spint2/Ptprc/Ndfip1/Il2rg/Ptpn23/Lgals9/Irgm1/Flot1/Pag1/Msn/Cd5/Ifng/Nt5e	29
GO:0032456	BP	GO:0032456	endocytic recycling	9/330	88/28891	7.68274e-07	2.48043e-05	1.67262e-05	Hgs/Rab35/Rab8a/Snx3/Stx12/Rab8b/Ptpn23/Snx12/Cmtm6	9
GO:0043162	BP	GO:0043162	ubiquitin-dependent protein catabolic process via the multivesicular body sorting pathway	6/330	29/28891	8.07754e-07	2.58736e-05	1.74472e-05	Stam/Tsg101/Chmp4b/Ptpn23/Vps4a/Vps37c	6
GO:0032760	BP	GO:0032760	positive regulation of tumor necrosis factor production	11/330	143/28891	8.2697e-07	2.62821e-05	1.77227e-05	H2-K1/Lrrfip2/H2-T23/Ifngr1/Ptprj/H2-D1/Tnfrsf8/Ptprc/Lgals9/Ifng/Cd84	11
GO:0022407	BP	GO:0022407	regulation of cell-cell adhesion	21/330	526/28891	8.58287e-07	2.7066e-05	1.82513e-05	H2-K1/Marchf7/H2-T23/Tgfbr2/Itch/H2-D1/Il6st/Lgals8/Ptpn6/Tyk2/Spint2/Ptprc/Ndfip1/Il2rg/Ptpn23/Lgals9/Irgm1/Flot1/Pag1/Cd5/Ifng	21
GO:0044788	BP	GO:0044788	modulation by host of viral process	7/330	46/28891	8.69311e-07	2.70868e-05	1.82653e-05	Zdhhc20/Rab5a/Psmc3/Stom/Ddx56/Ifng/Igf2r	7
GO:0006909	BP	GO:0006909	phagocytosis	14/330	242/28891	8.72263e-07	2.70868e-05	1.82653e-05	Rab5a/Calr/Ptprj/Vamp7/Tyro3/Timd2/Ldlr/Snx3/Ptprc/Il2rg/Pip4p2/Clcn3/Ifng/Arl8b	14
GO:0032103	BP	GO:0032103	positive regulation of response to external stimulus	24/330	668/28891	9.23163e-07	2.84502e-05	1.91847e-05	H2-K1/Lrrfip2/H2-T23/Bmpr2/Calr/Ptprj/Cxcr4/H2-D1/Vamp7/Il17ra/Naglu/Tyro3/Srebf1/Ldlr/Ptger4/Hmgb2/Ulbp1/Lgals9/Irgm1/Flot1/H2-M3/Abcc1/Rftn1/Ifng	24
GO:1903557	BP	GO:1903557	positive regulation of tumor necrosis factor superfamily cytokine production	11/330	145/28891	9.49467e-07	2.90408e-05	1.9583e-05	H2-K1/Lrrfip2/H2-T23/Ifngr1/Ptprj/H2-D1/Tnfrsf8/Ptprc/Lgals9/Ifng/Cd84	11
GO:1990778	BP	GO:1990778	protein localization to cell periphery	18/330	400/28891	9.81578e-07	2.97989e-05	2.00942e-05	Atp2c1/Vamp7/Abca2/Snap23/Vti1b/Rab8a/Golga7/Erbb4/Efr3a/Vamp3/Ezr/Vamp2/Rab8b/Stx8/Flot1/Adcy6/Rab10/Vps4a	18
GO:0042267	BP	GO:0042267	natural killer cell mediated cytotoxicity	10/330	117/28891	9.9941e-07	2.98941e-05	2.01584e-05	H2-K1/H2-T23/H2-D1/Vamp7/Stx11/Ptpn6/Ulbp1/Lgals9/H2-M3/Arl8b	10
GO:1902600	BP	GO:1902600	proton transmembrane transport	10/330	117/28891	9.9941e-07	2.98941e-05	2.01584e-05	Atp6v0a2/Atp6v1e1/Atp6v0d1/Atp6v1b2/Atp6v1a/Atp6v1d/Atp7a/Slc9a8/Slc9a9/Clcn3	10
GO:0006869	BP	GO:0006869	lipid transport	19/330	445/28891	1.07367e-06	3.18809e-05	2.14981e-05	Abcb1b/Vamp7/Abca2/Lrp10/Ldlr/Ugcg/Scarb2/Atp11c/Abcc4/Stard3/Stx12/Kcnn4/Atp8a1/Abcc1/Stard3nl/Sigmar1/Pitpnb/Vps4a/Arl8b	19
GO:0051656	BP	GO:0051656	establishment of organelle localization	20/330	491/28891	1.15532e-06	3.40568e-05	2.29654e-05	Hgs/Stam/Sdcbp/Vamp7/Snap23/Naglu/Steap3/Tsg101/Enkd1/Chmp4b/Stxbp2/Stard3/Ezr/Aurkb/Pdcd6ip/Stard3nl/Tacc2/Vps4a/Ccnb1/Cd84	20
GO:0050776	BP	GO:0050776	regulation of immune response	30/330	982/28891	1.18444e-06	3.4664e-05	2.33749e-05	H2-K1/Lrrfip2/H2-T23/Ptprj/H2-D1/Vamp7/Naglu/Fyn/Tyro3/Srebf1/Pdcd1/Grb2/Stxbp2/Ptpn6/Ezr/Gcsam/Hmgb2/Tyk2/Ptprc/Kcnn4/Aurkb/Ulbp1/Ndfip1/Lgals9/Irgm1/Flot1/H2-M3/Rftn1/Ifng/Cd84	30
GO:1903037	BP	GO:1903037	regulation of leukocyte cell-cell adhesion	18/330	407/28891	1.25672e-06	3.64057e-05	2.45493e-05	H2-K1/Marchf7/H2-T23/Tgfbr2/Itch/H2-D1/Il6st/Lgals8/Ptpn6/Tyk2/Ptprc/Ndfip1/Il2rg/Lgals9/Irgm1/Pag1/Cd5/Ifng	18
GO:0002228	BP	GO:0002228	natural killer cell mediated immunity	10/330	120/28891	1.26185e-06	3.64057e-05	2.45493e-05	H2-K1/H2-T23/H2-D1/Vamp7/Stx11/Ptpn6/Ulbp1/Lgals9/H2-M3/Arl8b	10
GO:0007167	BP	GO:0007167	enzyme-linked receptor protein signaling pathway	30/330	988/28891	1.34048e-06	3.84018e-05	2.58953e-05	Prmt1/Hgs/Lnpep/Bmpr2/Tgfbr2/Notch2/Ptpra/Sdcbp/Tgfbr1/Ptprj/Il6st/Sema6a/Rbbp7/Fyn/Tyro3/Erbb4/Ddr1/Srebf1/Acvr1/Acvr1b/Grb2/Tsg101/Acvr2a/Tyk2/Lgals9/Flt3/Tmem100/Gnai2/Mvb12b/Spry4	30
GO:0030183	BP	GO:0030183	B cell differentiation	12/330	182/28891	1.3603e-06	3.86971e-05	2.60945e-05	Notch2/Ptprj/Top2b/Itm2a/Lgals8/Atp11c/Ptpn6/Ptprc/Il2rg/Igkc/Flt3/Il9r	12
GO:0046755	BP	GO:0046755	viral budding	5/330	18/28891	1.43041e-06	4.0409e-05	2.72488e-05	Tsg101/Chmp4b/Pdcd6ip/Vps4a/Mvb12b	5
GO:0050863	BP	GO:0050863	regulation of T cell activation	18/330	411/28891	1.44369e-06	4.05029e-05	2.73122e-05	H2-K1/Marchf7/H2-T23/Tgfbr2/Itch/H2-D1/Il6st/Lgals8/Ptpn6/Tyk2/Ptprc/Ndfip1/Il2rg/Lgals9/Irgm1/Pag1/Cd5/Ifng	18
GO:1903649	BP	GO:1903649	regulation of cytoplasmic transport	6/330	32/28891	1.49711e-06	4.1714e-05	2.81289e-05	Snx3/Ezr/Ptpn23/Snx12/Msn/Rab21	6
GO:0050778	BP	GO:0050778	positive regulation of immune response	26/330	788/28891	1.57118e-06	4.348e-05	2.93197e-05	H2-K1/Lrrfip2/H2-T23/Ptprj/H2-D1/Vamp7/Naglu/Fyn/Tyro3/Srebf1/Grb2/Stxbp2/Ptpn6/Ezr/Gcsam/Hmgb2/Tyk2/Ptprc/Kcnn4/Ulbp1/Lgals9/Irgm1/Flot1/H2-M3/Rftn1/Ifng	26
GO:0001909	BP	GO:0001909	leukocyte mediated cytotoxicity	12/330	185/28891	1.61539e-06	4.44014e-05	2.9941e-05	H2-K1/H2-T23/H2-D1/Vamp7/Stx11/Stxbp2/Ptpn6/Ptprc/Ulbp1/Lgals9/H2-M3/Arl8b	12
GO:0051085	BP	GO:0051085	chaperone cofactor-dependent protein refolding	6/330	33/28891	1.81229e-06	4.94792e-05	3.33651e-05	St13/Hspa2/Dnajc7/Hspa1l/Hspa1a/Hspa1b	6
GO:0030335	BP	GO:0030335	positive regulation of cell migration	22/330	602/28891	2.01305e-06	5.4594e-05	3.68142e-05	Bmpr2/Calr/Tgfbr2/Sdcbp/Tgfbr1/Ptprj/Cxcr4/Il6st/Sema6a/Erbb4/Acvr1/Acvr1b/Ptger4/Trim32/Ptprc/Atp7a/Lgals9/Atp8a1/Abcc1/Ptp4a1/Gnai2/Ifng	22
GO:0008333	BP	GO:0008333	endosome to lysosome transport	8/330	74/28891	2.08408e-06	5.58143e-05	3.7637e-05	Hgs/Vamp7/Tsg101/Chmp4b/Stx8/Vps4a/Chmp1b2/Arl8b	8
GO:0006892	BP	GO:0006892	post-Golgi vesicle-mediated transport	9/330	99/28891	2.08549e-06	5.58143e-05	3.7637e-05	Atp2c1/Vamp7/Vti1b/Golga7/Vamp3/Chic2/Vamp2/Rab10/Scfd1	9
GO:1903047	BP	GO:1903047	mitotic cell cycle process	25/330	751/28891	2.14516e-06	5.7036e-05	3.84609e-05	Usp8/Tom1l2/Abcb1b/Rab35/Cep55/Acvr1/Acvr1b/Anp32b/Brox/Enkd1/Hspa2/Chmp4b/Cdc73/Ptpn6/Ranbp1/Aurkb/Pdcd6ip/Ctdsp1/Tacc2/Vps4a/Rhou/Hspa1a/Hspa1b/Psme2/Ccnb1	25
GO:0002521	BP	GO:0002521	leukocyte differentiation	24/330	703/28891	2.23927e-06	5.91517e-05	3.98876e-05	Tmem176b/Tgfbr2/Notch2/Ptprj/Naglu/Tyro3/Wwp1/Top2b/Itm2a/Lgals8/Ptger4/Atp11c/Ptpn6/Ptprc/Atp7a/Ndfip1/Il2rg/Igkc/Lgals9/Ccr9/Flt3/Ifng/Il9r/Cd3d	24
GO:0046641	BP	GO:0046641	positive regulation of alpha-beta T cell proliferation	7/330	53/28891	2.33786e-06	6.13576e-05	4.1375e-05	H2-K1/H2-T23/Tgfbr2/H2-D1/Tyk2/Ptprc/Irgm1	7
GO:0032388	BP	GO:0032388	positive regulation of intracellular transport	12/330	192/28891	2.38159e-06	6.21046e-05	4.18787e-05	Bcap31/Bag3/Fyn/Anp32b/Stom/Ezr/Vamp2/Ptpn23/Hspa1l/Msn/Rab21/Ifng	12
GO:0090100	BP	GO:0090100	positive regulation of transmembrane receptor protein serine/threonine kinase signaling pathway	9/330	101/28891	2.46621e-06	6.39017e-05	4.30905e-05	Bmpr2/Tgfbr2/Notch2/Sdcbp/Tgfbr1/Acvr1/Acvr1b/Acvr2a/Lgals9	9
GO:0030100	BP	GO:0030100	regulation of endocytosis	16/330	344/28891	2.58475e-06	6.65491e-05	4.48758e-05	Ankrd13a/Calr/Sdcbp/Ptprj/Rab5b/Abca2/Rab5c/Snx3/Tsg101/Ptprc/Il2rg/Snx12/Pip4p2/Flot1/Rab21/Ifng	16
GO:0097190	BP	GO:0097190	apoptotic signaling pathway	23/330	660/28891	2.60419e-06	6.66279e-05	4.49289e-05	Marchf7/Bcap31/Tgfbr1/Bag3/Pdia3/Hyou1/Fyn/Steap3/Cdip1/Acvr1/Acvr1b/Bnip3l/Bnip3/Trim32/Hmgb2/Ptprc/Atp7a/Gnai3/Cd5/Itm2c/Gnai2/Ifng/Il9r	23
GO:0051222	BP	GO:0051222	positive regulation of protein transport	16/330	346/28891	2.78421e-06	7.07884e-05	4.77345e-05	Bcap31/Atp2c1/Bag3/Gja1/Fyn/Tm7sf3/Anp32b/Ptger4/Gna11/Tsg101/Stom/Vamp2/Kcnn4/Ptpn23/Hspa1l/Ifng	16
GO:0042982	BP	GO:0042982	amyloid precursor protein metabolic process	8/330	77/28891	2.82462e-06	7.13699e-05	4.81265e-05	Ifngr1/Abca2/Naglu/Itm2b/Itm2a/Ncstn/Itm2c/Ifng	8
GO:0000041	BP	GO:0000041	transition metal ion transport	9/330	103/28891	2.90529e-06	7.16286e-05	4.8301e-05	Atp2c1/Abcb6/Timd2/Steap3/Fth1/Snx3/Atp7a/Ifng/Abcc5	9
GO:0002704	BP	GO:0002704	negative regulation of leukocyte mediated immunity	9/330	103/28891	2.90529e-06	7.16286e-05	4.8301e-05	H2-K1/H2-T23/H2-D1/Bst2/Ptpn6/Ptprc/Ndfip1/Lgals9/Cd84	9
GO:0045921	BP	GO:0045921	positive regulation of exocytosis	9/330	103/28891	2.90529e-06	7.16286e-05	4.8301e-05	Hgs/Rab5a/Stam/Sdcbp/Vamp7/Tsg101/Stxbp2/Pdcd6ip/Vps4a	9
GO:0046635	BP	GO:0046635	positive regulation of alpha-beta T cell activation	9/330	103/28891	2.90529e-06	7.16286e-05	4.8301e-05	H2-K1/H2-T23/Tgfbr2/H2-D1/Tyk2/Ptprc/Il2rg/Irgm1/Ifng	9
GO:1903532	BP	GO:1903532	positive regulation of secretion by cell	17/330	390/28891	3.01637e-06	7.35213e-05	4.95773e-05	Hgs/Rab5a/Stam/Sdcbp/Gja1/Vamp7/Tm7sf3/Ptger4/Gna11/Tsg101/Stxbp2/Acvr2a/Rab8b/Kcnn4/Ptpn23/Pdcd6ip/Vps4a	17
GO:0002507	BP	GO:0002507	tolerance induction	7/330	55/28891	3.0182e-06	7.35213e-05	4.95773e-05	H2-K1/Marchf7/H2-T23/Tgfbr2/Itch/H2-D1/Pdcd1	7
GO:1903829	BP	GO:1903829	positive regulation of protein localization	20/330	531/28891	3.77717e-06	9.14614e-05	6.16748e-05	Bcap31/Atp2c1/Bag3/Gja1/Fyn/Erbb4/Tm7sf3/Anp32b/Ptger4/Gna11/Tsg101/Stom/Ezr/Tyk2/Vamp2/Kcnn4/Ptpn23/Hspa1l/Msn/Ifng	20
GO:0001818	BP	GO:0001818	negative regulation of cytokine production	15/330	314/28891	3.84912e-06	9.26522e-05	6.24778e-05	Bst2/Atp2b1/Ptger4/Ptpn6/Ezr/Fxr1/Ptprc/Ndfip1/Lgals9/Irgm1/Ddx56/Flt3/Ifng/Sigirr/Cd84	15
GO:0072659	BP	GO:0072659	protein localization to plasma membrane	15/330	315/28891	4.00045e-06	9.57283e-05	6.45521e-05	Atp2c1/Vamp7/Vti1b/Rab8a/Golga7/Efr3a/Vamp3/Ezr/Vamp2/Rab8b/Stx8/Flot1/Adcy6/Rab10/Vps4a	15
GO:0002377	BP	GO:0002377	immunoglobulin production	14/330	276/28891	4.0741e-06	9.69208e-05	6.53562e-05	H2-K1/H2-T23/H2-D1/Igkv1-122/Itm2a/Crlf2/Ptprc/Ndfip1/Igkv1-117/Igkv8-27/Igkv8-19/Igkv8-21/Igkv8-30/Ifng	14
GO:0072665	BP	GO:0072665	protein localization to vacuole	8/330	81/28891	4.1502e-06	9.81503e-05	6.61853e-05	Hgs/Stam/Vamp7/Scarb2/Ptpn23/Irgm1/Vps4a/Vps37c	8
GO:2000147	BP	GO:2000147	positive regulation of cell motility	22/330	630/28891	4.17404e-06	9.81503e-05	6.61853e-05	Bmpr2/Calr/Tgfbr2/Sdcbp/Tgfbr1/Ptprj/Cxcr4/Il6st/Sema6a/Erbb4/Acvr1/Acvr1b/Ptger4/Trim32/Ptprc/Atp7a/Lgals9/Atp8a1/Abcc1/Ptp4a1/Gnai2/Ifng	22
GO:0002449	BP	GO:0002449	lymphocyte mediated immunity	19/330	489/28891	4.24414e-06	9.9225e-05	6.691e-05	H2-K1/H2-T23/H2-D1/Vamp7/Ighv1-66/Stx11/Crlf2/Ptpn6/Ptprc/Ulbp1/Ndfip1/Ighv1-19/Ighv1-36/Lgals9/H2-M3/Rftn1/Ifng/Il9r/Arl8b	19
GO:0051084	BP	GO:0051084	'de novo' post-translational protein folding	6/330	38/28891	4.3053e-06	0.00010008	6.74864e-05	St13/Hspa2/Dnajc7/Hspa1l/Hspa1a/Hspa1b	6
GO:1904951	BP	GO:1904951	positive regulation of establishment of protein localization	16/330	362/28891	4.9485e-06	0.000114378	7.7128e-05	Bcap31/Atp2c1/Bag3/Gja1/Fyn/Tm7sf3/Anp32b/Ptger4/Gna11/Tsg101/Stom/Vamp2/Kcnn4/Ptpn23/Hspa1l/Ifng	16
GO:0048002	BP	GO:0048002	antigen processing and presentation of peptide antigen	8/330	83/28891	4.9898e-06	0.000114681	7.73322e-05	H2-K1/H2-T23/Calr/Pdia3/H2-D1/Tapbp/Ulbp1/H2-M3	8
GO:0006458	BP	GO:0006458	'de novo' protein folding	6/330	39/28891	5.03944e-06	0.000115171	7.76629e-05	St13/Hspa2/Dnajc7/Hspa1l/Hspa1a/Hspa1b	6
GO:0030101	BP	GO:0030101	natural killer cell activation	10/330	140/28891	5.10111e-06	0.000115929	7.8174e-05	H2-K1/H2-T23/H2-D1/Vamp7/Tyro3/Stx11/Tyk2/Ptprc/Ulbp1/Lgals9	10
GO:0006457	BP	GO:0006457	protein folding	11/330	173/28891	5.32078e-06	0.00012025	8.10875e-05	Calr/Pdia3/Hspa4/St13/Hspa4l/Hspa2/Hsp90b1/Dnajc7/Hspa1l/Hspa1a/Hspa1b	11
GO:1903706	BP	GO:1903706	regulation of hemopoiesis	18/330	452/28891	5.43162e-06	0.000121604	8.20008e-05	Prmt1/Tmem176b/Tgfbr2/Notch2/Acvr1b/Atp11c/Cdc73/Ptpn6/Acvr2a/Hmgb2/Ptprc/Ndfip1/Il2rg/Lgals9/Irgm1/Rbfox2/Flt3/Ifng	18
GO:0006893	BP	GO:0006893	Golgi to plasma membrane transport	7/330	60/28891	5.47039e-06	0.000121604	8.20008e-05	Atp2c1/Vamp7/Golga7/Vamp3/Chic2/Vamp2/Rab10	7
GO:1903533	BP	GO:1903533	regulation of protein targeting	7/330	60/28891	5.47039e-06	0.000121604	8.20008e-05	Bag3/Vamp7/Fyn/Srebf1/Stom/Bnip3l/Hspa1l	7
GO:0010876	BP	GO:0010876	lipid localization	19/330	501/28891	5.99767e-06	0.000132601	8.94161e-05	Abcb1b/Vamp7/Abca2/Lrp10/Ldlr/Ugcg/Scarb2/Atp11c/Abcc4/Stard3/Stx12/Kcnn4/Atp8a1/Abcc1/Stard3nl/Sigmar1/Pitpnb/Vps4a/Arl8b	19
GO:0050727	BP	GO:0050727	regulation of inflammatory response	17/330	411/28891	6.04046e-06	0.000132825	8.95672e-05	H2-K1/H2-T23/Hspa4/H2-D1/Vamp7/Il17ra/Tyro3/Ldlr/Ptger4/Ptpn6/Fxr1/Ndfip1/Lgals9/Irgm1/Abcc1/Ifng/Nt5e	17
GO:0044091	BP	GO:0044091	membrane biogenesis	7/330	61/28891	6.11948e-06	0.000133299	8.98871e-05	Ugcg/Serinc1/Brox/Chmp4b/Flot1/Rftn1/Vps4a	7
GO:0050670	BP	GO:0050670	regulation of lymphocyte proliferation	14/330	286/28891	6.12757e-06	0.000133299	8.98871e-05	H2-K1/Marchf7/H2-T23/Tgfbr2/Itch/H2-D1/Il6st/Ptpn6/Tyk2/Ptprc/Ndfip1/Lgals9/Irgm1/Ifng	14
GO:0040017	BP	GO:0040017	positive regulation of locomotion	22/330	646/28891	6.20364e-06	0.000134236	9.05189e-05	Bmpr2/Calr/Tgfbr2/Sdcbp/Tgfbr1/Ptprj/Cxcr4/Il6st/Sema6a/Erbb4/Acvr1/Acvr1b/Ptger4/Trim32/Ptprc/Atp7a/Lgals9/Atp8a1/Abcc1/Ptp4a1/Gnai2/Ifng	22
GO:0042116	BP	GO:0042116	macrophage activation	9/330	113/28891	6.25499e-06	0.000134631	9.07854e-05	Ifngr1/Hspa4/Naglu/Ldlr/Ulbp1/Lgals9/Irgm1/Ifng/Cd84	9
GO:0042026	BP	GO:0042026	protein refolding	5/330	24/28891	6.70743e-06	0.00014361	9.68397e-05	St13/Hspa2/Hspa1l/Hspa1a/Hspa1b	5
GO:0022406	BP	GO:0022406	membrane docking	8/330	87/28891	7.10573e-06	0.000151341	0.000102053	Rab8a/Snx3/Stx11/Stxbp2/Stx12/Vamp2/Rab8b/Stx8	8
GO:0032944	BP	GO:0032944	regulation of mononuclear cell proliferation	14/330	290/28891	7.17764e-06	0.000152076	0.000102549	H2-K1/Marchf7/H2-T23/Tgfbr2/Itch/H2-D1/Il6st/Ptpn6/Tyk2/Ptprc/Ndfip1/Lgals9/Irgm1/Ifng	14
GO:0010001	BP	GO:0010001	glial cell differentiation	14/330	292/28891	7.76021e-06	0.000163567	0.000110298	Ifngr1/Notch2/Ptpra/Ptprj/Cxcr4/Il6st/Abca2/Naglu/Ldlr/Grb2/Ncstn/Abcc1/Ifng/Ttc21b	14
GO:0007035	BP	GO:0007035	vacuolar acidification	5/330	25/28891	8.30605e-06	0.00017417	0.000117447	Tmem9/Atp6v0a2/Atp6v0d1/Atp6v1b2/Tmem106b	5
GO:0048278	BP	GO:0048278	vesicle docking	7/330	64/28891	8.46223e-06	0.000176535	0.000119042	Rab8a/Stx11/Stxbp2/Stx12/Vamp2/Rab8b/Stx8	7
GO:0007033	BP	GO:0007033	vacuole organization	12/330	221/28891	1.00601e-05	0.000208798	0.000140798	Bag3/Tmem9/Naglu/Tom1/Chmp4b/Stx12/Irgm1/Tmem106b/Vps4a/Chmp1b2/Scfd1/Arl8b	12
GO:0019068	BP	GO:0019068	virion assembly	5/330	26/28891	1.01877e-05	0.000209312	0.000141144	Tsg101/Chmp4b/Pdcd6ip/Vps4a/Mvb12b	5
GO:2000561	BP	GO:2000561	regulation of CD4-positive, alpha-beta T cell proliferation	5/330	26/28891	1.01877e-05	0.000209312	0.000141144	Tgfbr2/Itch/Ndfip1/Lgals9/Irgm1	5
GO:0050792	BP	GO:0050792	regulation of viral process	11/330	187/28891	1.11462e-05	0.000227852	0.000153647	Cxcr4/Tyro3/Bst2/Top2b/Snx3/Ifitm3/Tsg101/Ifitm2/Stom/Trim32/Vps4a	11
GO:0015914	BP	GO:0015914	phospholipid transport	8/330	93/28891	1.16718e-05	0.00023644	0.000159437	Abcb1b/Ldlr/Scarb2/Atp11c/Kcnn4/Atp8a1/Abcc1/Pitpnb	8
GO:0071346	BP	GO:0071346	cellular response to type II interferon	9/330	122/28891	1.16825e-05	0.00023644	0.000159437	Syncrip/Ifngr1/Vamp3/Stx11/Stxbp2/Tyk2/Stx8/Irgm1/Ifng	9
GO:0007417	BP	GO:0007417	central nervous system development	28/330	993/28891	1.20867e-05	0.000243409	0.000164137	Ifngr1/Tgfbr2/Ptpra/Ptprj/Cxcr4/Abcb1b/Il6st/Abcb6/Abca2/Naglu/Rbbp7/Fyn/Tyro3/Erbb4/Ogdh/Ldlr/Top2b/Anp32b/Atrn/Fxr1/Atp7a/Csnk1d/Ncstn/Rbfox2/Abcc1/Tacc2/Ifng/Ttc21b	28
GO:0035739	BP	GO:0035739	CD4-positive, alpha-beta T cell proliferation	5/330	27/28891	1.23865e-05	0.000245797	0.000165747	Tgfbr2/Itch/Ndfip1/Lgals9/Irgm1	5
GO:0045324	BP	GO:0045324	late endosome to vacuole transport	5/330	27/28891	1.23865e-05	0.000245797	0.000165747	Stam/Chmp4b/Ptpn23/Vps4a/Chmp1b2	5
GO:0060391	BP	GO:0060391	positive regulation of SMAD protein signal transduction	5/330	27/28891	1.23865e-05	0.000245797	0.000165747	Bmpr2/Tgfbr2/Tgfbr1/Acvr1/Lgals9	5
GO:0002285	BP	GO:0002285	lymphocyte activation involved in immune response	12/330	227/28891	1.3163e-05	0.000259938	0.000175283	Notch2/Vamp7/Itm2a/Lgals8/Ptger4/Stx11/Ptprc/Atp7a/Ndfip1/Lgals9/H2-M3/Ifng	12
GO:0051047	BP	GO:0051047	positive regulation of secretion	17/330	437/28891	1.33938e-05	0.000263218	0.000177494	Hgs/Rab5a/Stam/Sdcbp/Gja1/Vamp7/Tm7sf3/Ptger4/Gna11/Tsg101/Stxbp2/Acvr2a/Rab8b/Kcnn4/Ptpn23/Pdcd6ip/Vps4a	17
GO:0051452	BP	GO:0051452	intracellular pH reduction	6/330	46/28891	1.35278e-05	0.000264573	0.000178409	Tmem9/Atp6v0a2/Atp6v0d1/Atp6v1b2/Slc9a8/Tmem106b	6
GO:0045055	BP	GO:0045055	regulated exocytosis	13/330	267/28891	1.39042e-05	0.000269603	0.0001818	Rab5a/Vamp7/Snap23/Vamp3/Stx11/Stxbp2/Vamp2/Lgals9/Syt13/Rab10/Gnai2/Cd84/Arl8b	13
GO:0000278	BP	GO:0000278	mitotic cell cycle	26/330	891/28891	1.39176e-05	0.000269603	0.0001818	Usp8/Sdcbp/Tom1l2/Abcb1b/Rab35/Cep55/Acvr1/Acvr1b/Anp32b/Brox/Enkd1/Hspa2/Chmp4b/Cdc73/Ptpn6/Ranbp1/Aurkb/Pdcd6ip/Ctdsp1/Tacc2/Vps4a/Rhou/Hspa1a/Hspa1b/Psme2/Ccnb1	26
GO:0036010	BP	GO:0036010	protein localization to endosome	5/330	28/28891	1.49386e-05	0.000287664	0.00019398	Ankrd13a/Tollip/Rab35/Ezr/Msn	5
GO:0051650	BP	GO:0051650	establishment of vesicle localization	11/330	193/28891	1.49914e-05	0.000287664	0.00019398	Hgs/Stam/Sdcbp/Vamp7/Naglu/Steap3/Tsg101/Stard3/Pdcd6ip/Stard3nl/Vps4a	11
GO:0006612	BP	GO:0006612	protein targeting to membrane	9/330	126/28891	1.51564e-05	0.000289217	0.000195026	Zdhhc20/Vamp7/Fyn/Golga7/Chmp4b/Stom/Rab8b/Zdhhc15/Vps37c	9
GO:0039702	BP	GO:0039702	viral budding via host ESCRT complex	4/330	14/28891	1.52855e-05	0.000289217	0.000195026	Tsg101/Chmp4b/Pdcd6ip/Vps4a	4
GO:1903651	BP	GO:1903651	positive regulation of cytoplasmic transport	4/330	14/28891	1.52855e-05	0.000289217	0.000195026	Ezr/Ptpn23/Msn/Rab21	4
GO:0006623	BP	GO:0006623	protein targeting to vacuole	6/330	47/28891	1.53595e-05	0.00028927	0.000195063	Hgs/Vamp7/Scarb2/Irgm1/Vps4a/Vps37c	6
GO:0045576	BP	GO:0045576	mast cell activation	8/330	97/28891	1.5922e-05	0.000298483	0.000201275	Vamp7/Snap23/Timd2/Stxbp2/Crlf2/Ptpn6/Cd48/Cd84	8
GO:0022409	BP	GO:0022409	positive regulation of cell-cell adhesion	15/330	354/28891	1.60611e-05	0.00029971	0.000202102	H2-K1/H2-T23/Tgfbr2/H2-D1/Il6st/Lgals8/Tyk2/Ptprc/Il2rg/Ptpn23/Lgals9/Irgm1/Flot1/Cd5/Ifng	15
GO:0033157	BP	GO:0033157	regulation of intracellular protein transport	12/330	232/28891	1.63577e-05	0.000303851	0.000204894	Bcap31/Bag3/Vamp7/Fyn/Srebf1/Snx3/Anp32b/Stom/Bnip3l/Vamp2/Hspa1l/Ifng	12
GO:0002460	BP	GO:0002460	adaptive immune response based on somatic recombination of immune receptors built from immunoglobulin superfamily domains	18/330	491/28891	1.65937e-05	0.000306833	0.000206906	H2-K1/H2-T23/H2-D1/Il17ra/Ighv1-66/Stx11/Crlf2/Ptpn6/Tyk2/Ptprc/Ulbp1/Ndfip1/Ighv1-19/Ighv1-36/H2-M3/Rftn1/Ifng/Il9r	18
GO:0140115	BP	GO:0140115	export across plasma membrane	7/330	71/28891	1.69203e-05	0.000310121	0.000209123	Gja1/Abcb1b/Atp2b1/Abcc4/Kcnn4/Abcc1/Abcc5	7
GO:0070663	BP	GO:0070663	regulation of leukocyte proliferation	14/330	313/28891	1.6924e-05	0.000310121	0.000209123	H2-K1/Marchf7/H2-T23/Tgfbr2/Itch/H2-D1/Il6st/Ptpn6/Tyk2/Ptprc/Ndfip1/Lgals9/Irgm1/Ifng	14
GO:0045785	BP	GO:0045785	positive regulation of cell adhesion	19/330	540/28891	1.71163e-05	0.000312239	0.000210551	H2-K1/H2-T23/Calr/Tgfbr2/Ptprj/H2-D1/Il6st/Lgals8/Ptger4/Ptpn6/Tyk2/Ptprc/Il2rg/Ptpn23/Lgals9/Irgm1/Flot1/Cd5/Ifng	19
GO:0019885	BP	GO:0019885	antigen processing and presentation of endogenous peptide antigen via MHC class I	6/330	48/28891	1.73862e-05	0.000314516	0.000212086	H2-K1/H2-T23/H2-D1/Tapbp/Ulbp1/H2-M3	6
GO:0031344	BP	GO:0031344	regulation of cell projection organization	24/330	795/28891	1.73958e-05	0.000314516	0.000212086	H2-K1/Rab5a/Bmpr2/Tgfbr1/Prkcsh/H2-D1/Vamp7/Sema6a/Fyn/Ddr1/Snx3/Scarb2/Ezr/Ranbp1/Fxr1/Rab8b/Atp7a/Zdhhc15/Trpv2/Ddx56/Adcy6/Tmem106b/Rab21/Itm2c	24
GO:0002703	BP	GO:0002703	regulation of leukocyte mediated immunity	14/330	314/28891	1.75342e-05	0.000315615	0.000212827	H2-K1/H2-T23/H2-D1/Vamp7/Bst2/Stxbp2/Ptpn6/Ptprc/Ulbp1/Ndfip1/Lgals9/H2-M3/Ifng/Cd84	14
GO:0034755	BP	GO:0034755	iron ion transmembrane transport	5/330	29/28891	1.78825e-05	0.000320468	0.0002161	Abcb6/Steap3/Atp7a/Ifng/Abcc5	5
GO:0050870	BP	GO:0050870	positive regulation of T cell activation	13/330	277/28891	2.04798e-05	0.000365402	0.0002464	H2-K1/H2-T23/Tgfbr2/H2-D1/Il6st/Lgals8/Tyk2/Ptprc/Il2rg/Lgals9/Irgm1/Cd5/Ifng	13
GO:0035710	BP	GO:0035710	CD4-positive, alpha-beta T cell activation	9/330	131/28891	2.07033e-05	0.000367777	0.000248002	Tgfbr2/Itch/Ptger4/Atp7a/Ndfip1/Il2rg/Lgals9/Irgm1/Ifng	9
GO:0042113	BP	GO:0042113	B cell activation	14/330	320/28891	2.16194e-05	0.000382382	0.00025785	Notch2/Ptprj/Top2b/Itm2a/Lgals8/Atp11c/Ptpn6/Ptprc/Ndfip1/Il2rg/Igkc/Flt3/Ifng/Il9r	14
GO:0002483	BP	GO:0002483	antigen processing and presentation of endogenous peptide antigen	6/330	50/28891	2.20863e-05	0.000388948	0.000262278	H2-K1/H2-T23/H2-D1/Tapbp/Ulbp1/H2-M3	6
GO:0051251	BP	GO:0051251	positive regulation of lymphocyte activation	15/330	367/28891	2.44194e-05	0.000428182	0.000288734	H2-K1/H2-T23/Tgfbr2/H2-D1/Il6st/Lgals8/Atp11c/Tyk2/Ptprc/Ulbp1/Il2rg/Lgals9/Irgm1/Cd5/Ifng	15
GO:0001558	BP	GO:0001558	regulation of cell growth	17/330	459/28891	2.50164e-05	0.000436547	0.000294375	Bmpr2/Sdcbp/Tgfbr1/Ptprj/Cxcr4/Gja1/Sema6a/Rbbp7/Ddr1/Bst2/Acvr1b/Tsg101/Cdc73/Trim32/Trpv2/Rab21/Il9r	17
GO:0032509	BP	GO:0032509	endosome transport via multivesicular body sorting pathway	5/330	31/28891	2.51111e-05	0.000436547	0.000294375	Stam/Chmp4b/Ptpn23/Vps4a/Chmp1b2	5
GO:0061952	BP	GO:0061952	midbody abscission	4/330	16/28891	2.72942e-05	0.00047248	0.000318605	Cep55/Chmp4b/Pdcd6ip/Vps4a	4
GO:0051607	BP	GO:0051607	defense response to virus	14/330	328/28891	2.83582e-05	0.000488819	0.000329623	Ifngr1/Ifnar1/Itch/Bst2/Dhx15/Ifitm3/Ifitm2/Bnip3l/Bnip3/Trim32/Ptprc/Irgm1/Ddx56/Ifng	14
GO:0001906	BP	GO:0001906	cell killing	13/330	286/28891	2.85829e-05	0.000490613	0.000330833	H2-K1/H2-T23/H2-D1/Vamp7/Stx11/Stxbp2/Ptpn6/Ptprc/Ulbp1/Lgals9/H2-M3/Ifng/Arl8b	13
GO:0140546	BP	GO:0140546	defense response to symbiont	14/330	329/28891	2.93184e-05	0.000501123	0.00033792	Ifngr1/Ifnar1/Itch/Bst2/Dhx15/Ifitm3/Ifitm2/Bnip3l/Bnip3/Trim32/Ptprc/Irgm1/Ddx56/Ifng	14
GO:0003158	BP	GO:0003158	endothelium development	9/330	137/28891	2.95539e-05	0.000503034	0.000339209	Bmpr2/Tgfbr1/Cxcr4/Abcb1b/Naglu/Acvr1/Ezr/Msn/Tmem100	9
GO:0031348	BP	GO:0031348	negative regulation of defense response	14/330	330/28891	3.0307e-05	0.000513704	0.000346404	H2-K1/H2-T23/Itch/H2-D1/Tyro3/Ldlr/Ptger4/Ptpn6/Fxr1/Aurkb/Ndfip1/Lgals9/Irgm1/Nt5e	14
GO:0019883	BP	GO:0019883	antigen processing and presentation of endogenous antigen	6/330	53/28891	3.10041e-05	0.000523339	0.000352901	H2-K1/H2-T23/H2-D1/Tapbp/Ulbp1/H2-M3	6
GO:0034204	BP	GO:0034204	lipid translocation	6/330	54/28891	3.45471e-05	0.000578345	0.000389993	Abcb1b/Abca2/Atp11c/Kcnn4/Atp8a1/Abcc1	6
GO:0071709	BP	GO:0071709	membrane assembly	6/330	54/28891	3.45471e-05	0.000578345	0.000389993	Ugcg/Brox/Chmp4b/Flot1/Rftn1/Vps4a	6
GO:0061640	BP	GO:0061640	cytoskeleton-dependent cytokinesis	8/330	108/28891	3.47967e-05	0.000580135	0.0003912	Usp8/Rab35/Cep55/Chmp4b/Aurkb/Septin11/Pdcd6ip/Vps4a	8
GO:0042102	BP	GO:0042102	positive regulation of T cell proliferation	9/330	140/28891	3.5065e-05	0.000582222	0.000392607	H2-K1/H2-T23/Tgfbr2/H2-D1/Il6st/Tyk2/Ptprc/Irgm1/Ifng	9
GO:0002440	BP	GO:0002440	production of molecular mediator of immune response	16/330	425/28891	3.55769e-05	0.000588321	0.00039672	H2-K1/H2-T23/H2-D1/Igkv1-122/Bst2/Itm2a/Crlf2/Ptprc/Ndfip1/Igkv1-117/Igkv8-27/Igkv8-19/Igkv8-21/Igkv8-30/Ifng/Litaf	16
GO:2000514	BP	GO:2000514	regulation of CD4-positive, alpha-beta T cell activation	7/330	80/28891	3.7025e-05	0.000609788	0.000411196	Tgfbr2/Itch/Ndfip1/Il2rg/Lgals9/Irgm1/Ifng	7
GO:0120035	BP	GO:0120035	regulation of plasma membrane bounded cell projection organization	23/330	781/28891	3.82056e-05	0.000626696	0.000422597	H2-K1/Rab5a/Bmpr2/Tgfbr1/Prkcsh/H2-D1/Vamp7/Sema6a/Fyn/Ddr1/Snx3/Scarb2/Ezr/Ranbp1/Fxr1/Atp7a/Zdhhc15/Trpv2/Ddx56/Adcy6/Tmem106b/Rab21/Itm2c	23
GO:0051648	BP	GO:0051648	vesicle localization	11/330	214/28891	3.88992e-05	0.00063551	0.000428541	Hgs/Stam/Sdcbp/Vamp7/Naglu/Steap3/Tsg101/Stard3/Pdcd6ip/Stard3nl/Vps4a	11
GO:0000281	BP	GO:0000281	mitotic cytokinesis	7/330	81/28891	4.01348e-05	0.00064789	0.000436889	Usp8/Rab35/Cep55/Chmp4b/Aurkb/Pdcd6ip/Vps4a	7
GO:0051453	BP	GO:0051453	regulation of intracellular pH	7/330	81/28891	4.01348e-05	0.00064789	0.000436889	Tmem9/Atp6v0a2/Atp6v0d1/Atp6v1b2/Slc9a8/Slc9a9/Tmem106b	7
GO:0140056	BP	GO:0140056	organelle localization by membrane tethering	7/330	81/28891	4.01348e-05	0.00064789	0.000436889	Rab8a/Stx11/Stxbp2/Stx12/Vamp2/Rab8b/Stx8	7
GO:0097696	BP	GO:0097696	receptor signaling pathway via STAT	11/330	216/28891	4.23353e-05	0.000679004	0.00045787	Hgs/Ifnar1/Il6st/Naglu/Fyn/Erbb4/Ptger4/Crlf2/Tyk2/Ptprc/Ifng	11
GO:0071363	BP	GO:0071363	cellular response to growth factor stimulus	21/330	680/28891	4.2396e-05	0.000679004	0.00045787	Prmt1/Hgs/Usp8/Bmpr2/Tgfbr2/Notch2/Sdcbp/Tgfbr1/Sema6a/Rab35/Rbbp7/Fyn/Erbb4/Acvr1/Acvr1b/Grb2/Acvr2a/Atp7a/Lgals9/Tmem100/Spry4	21
GO:0001913	BP	GO:0001913	T cell mediated cytotoxicity	7/330	82/28891	4.34557e-05	0.000690538	0.000465647	H2-K1/H2-T23/H2-D1/Stx11/Ptprc/Ulbp1/H2-M3	7
GO:0051851	BP	GO:0051851	modulation by host of symbiont process	7/330	82/28891	4.34557e-05	0.000690538	0.000465647	Zdhhc20/Rab5a/Psmc3/Stom/Ddx56/Ifng/Igf2r	7
GO:0006862	BP	GO:0006862	nucleotide transport	5/330	35/28891	4.62151e-05	0.000727728	0.000490726	Gja1/Abcc4/Abcc1/Lrrc8c/Abcc5	5
GO:0071985	BP	GO:0071985	multivesicular body sorting pathway	5/330	35/28891	4.62151e-05	0.000727728	0.000490726	Stam/Chmp4b/Ptpn23/Vps4a/Chmp1b2	5
GO:0002520	BP	GO:0002520	immune system development	12/330	258/28891	4.63327e-05	0.000727728	0.000490726	H2-K1/Marchf7/H2-T23/Tgfbr2/Tgfbr1/Itch/H2-D1/Pdcd1/Ptprc/Ndfip1/Flt3/Ifng	12
GO:0042327	BP	GO:0042327	positive regulation of phosphorylation	23/330	795/28891	5.00609e-05	0.000783261	0.000528173	Bmpr2/Notch2/Sdcbp/Ptprj/Cxcr4/Il6st/Fyn/Tyro3/Erbb4/Ddr1/Acvr1/Ptger4/Hspa2/Acvr2a/Fxr1/Ptprc/Aurkb/Csnk1d/Irgm1/Flot1/Flt3/Ifng/Ccnb1	23
GO:1901653	BP	GO:1901653	cellular response to peptide	14/330	346/28891	5.06229e-05	0.000788365	0.000531615	Ptpra/Ptprj/Gja1/Fyn/Rab8a/Srebf1/Atp2b1/Grb2/Tyk2/Vamp2/Abcc1/Adcy6/Rab10/Gnai2	14
GO:0140888	BP	GO:0140888	interferon-mediated signaling pathway	7/330	84/28891	5.07747e-05	0.000788365	0.000531615	Ifngr1/Ifnar1/Ifitm3/Ifitm2/Tyk2/Irgm1/Ifng	7
GO:1903039	BP	GO:1903039	positive regulation of leukocyte cell-cell adhesion	13/330	303/28891	5.1759e-05	0.000800592	0.00053986	H2-K1/H2-T23/Tgfbr2/H2-D1/Il6st/Lgals8/Tyk2/Ptprc/Il2rg/Lgals9/Irgm1/Cd5/Ifng	13
GO:0050851	BP	GO:0050851	antigen receptor-mediated signaling pathway	10/330	184/28891	5.46726e-05	0.000842456	0.00056809	Ptprj/Fyn/Grb2/Ptpn6/Ezr/Gcsam/Ptprc/Kcnn4/Rftn1/Ifng	10
GO:0031331	BP	GO:0031331	positive regulation of cellular catabolic process	14/330	349/28891	5.55371e-05	0.000852547	0.000574895	Syncrip/Bag3/Itch/Abca2/Tom1/Ldlr/Bnip3l/Bnip3/Trim32/Fxr1/Gnai3/Irgm1/Cpt1a/Ifng	14
GO:0097035	BP	GO:0097035	regulation of membrane lipid distribution	6/330	59/28891	5.74533e-05	0.000878647	0.000592495	Abcb1b/Abca2/Atp11c/Kcnn4/Atp8a1/Abcc1	6
GO:0070848	BP	GO:0070848	response to growth factor	21/330	695/28891	5.78432e-05	0.000881296	0.000594281	Prmt1/Hgs/Usp8/Bmpr2/Tgfbr2/Notch2/Sdcbp/Tgfbr1/Sema6a/Rab35/Rbbp7/Fyn/Erbb4/Acvr1/Acvr1b/Grb2/Acvr2a/Atp7a/Lgals9/Tmem100/Spry4	21
GO:0050730	BP	GO:0050730	regulation of peptidyl-tyrosine phosphorylation	12/330	266/28891	6.21364e-05	0.000943175	0.000636007	Ifnar1/Ptprj/Il6st/Fyn/Erbb4/Acvr1/Ptger4/Tsg101/Ptpn6/Ptprc/Ifng/Il9r	12
GO:0019884	BP	GO:0019884	antigen processing and presentation of exogenous antigen	6/330	60/28891	6.32292e-05	0.000949138	0.000640029	H2-K1/H2-T23/H2-D1/Tapbp/H2-M3/Psme2	6
GO:0033003	BP	GO:0033003	regulation of mast cell activation	6/330	60/28891	6.32292e-05	0.000949138	0.000640029	Vamp7/Timd2/Stxbp2/Crlf2/Ptpn6/Cd84	6
GO:0043030	BP	GO:0043030	regulation of macrophage activation	6/330	60/28891	6.32292e-05	0.000949138	0.000640029	Hspa4/Ldlr/Ulbp1/Lgals9/Irgm1/Cd84	6
GO:0045446	BP	GO:0045446	endothelial cell differentiation	8/330	118/28891	6.55271e-05	0.000980015	0.00066085	Bmpr2/Tgfbr1/Cxcr4/Abcb1b/Acvr1/Ezr/Msn/Tmem100	8
GO:0002275	BP	GO:0002275	myeloid cell activation involved in immune response	8/330	119/28891	6.95618e-05	0.00103655	0.00069897	Vamp7/Snap23/Stx11/Stxbp2/Ptpn6/Vamp2/Ifng/Cd84	8
GO:0002643	BP	GO:0002643	regulation of tolerance induction	4/330	20/28891	7.00831e-05	0.0010405	0.000701639	Marchf7/Tgfbr2/Itch/Pdcd1	4
GO:0030641	BP	GO:0030641	regulation of cellular pH	7/330	89/28891	7.35746e-05	0.00108686	0.000732898	Tmem9/Atp6v0a2/Atp6v0d1/Atp6v1b2/Slc9a8/Slc9a9/Tmem106b	7
GO:1901699	BP	GO:1901699	cellular response to nitrogen compound	22/330	761/28891	7.37398e-05	0.00108686	0.000732898	Ptpra/Ptprj/Cxcr4/Gja1/Fyn/Rab8a/Srebf1/Atp2b1/Gna11/Grb2/Hsp90b1/Ezr/Tyk2/Vamp2/Atp7a/Gnai3/Flot1/Ncstn/Abcc1/Adcy6/Rab10/Gnai2	22
GO:0001916	BP	GO:0001916	positive regulation of T cell mediated cytotoxicity	6/330	62/28891	7.61695e-05	0.00111862	0.000754314	H2-K1/H2-T23/H2-D1/Ptprc/Ulbp1/H2-M3	6
GO:0042908	BP	GO:0042908	xenobiotic transport	5/330	39/28891	7.8958e-05	0.00115036	0.00077572	Gja1/Abcb1b/Abcc4/Abcc1/Abcc5	5
GO:0002707	BP	GO:0002707	negative regulation of lymphocyte mediated immunity	7/330	90/28891	7.9008e-05	0.00115036	0.00077572	H2-K1/H2-T23/H2-D1/Ptpn6/Ptprc/Ndfip1/Lgals9	7
GO:0031647	BP	GO:0031647	regulation of protein stability	13/330	316/28891	7.91794e-05	0.00115036	0.00077572	Usp8/Marchf7/Calr/Rnf149/Bag3/Golga7/Srebf1/Cdc73/Stx12/Irgm1/Flot1/Rab21/Cmtm6	13
GO:0016049	BP	GO:0016049	cell growth	18/330	556/28891	8.28653e-05	0.00119963	0.000808941	Bmpr2/Tgfbr2/Sdcbp/Tgfbr1/Ptprj/Cxcr4/Gja1/Sema6a/Rbbp7/Ddr1/Bst2/Acvr1b/Tsg101/Cdc73/Trim32/Trpv2/Rab21/Il9r	18
GO:0043457	BP	GO:0043457	regulation of cellular respiration	6/330	63/28891	8.33863e-05	0.00120289	0.000811141	Ifnar1/Macroh2a1/Bnip3/Atp7a/Opn3/Ifng	6
GO:0007051	BP	GO:0007051	spindle organization	10/330	194/28891	8.50805e-05	0.00122299	0.000824697	Chmp4b/Ezr/Ranbp1/Aurkb/Csnk1d/Tacc2/Ccdc69/Hspa1a/Hspa1b/Ccnb1	10
GO:0048143	BP	GO:0048143	astrocyte activation	4/330	21/28891	8.57962e-05	0.00122894	0.000828706	Ifngr1/Naglu/Ldlr/Ifng	4
GO:0044000	BP	GO:0044000	movement in host	8/330	123/28891	8.78237e-05	0.00125357	0.000845313	Tmprss11e/Snx3/Ifitm3/Tsg101/Ifitm2/Chmp4b/Vps4a/Arl8b	8
GO:0043001	BP	GO:0043001	Golgi to plasma membrane protein transport	5/330	40/28891	8.93989e-05	0.00127159	0.000857466	Atp2c1/Vamp7/Golga7/Vamp3/Vamp2	5
GO:0002444	BP	GO:0002444	myeloid leukocyte mediated immunity	9/330	158/28891	8.97832e-05	0.00127261	0.000858152	H2-K1/H2-T23/H2-D1/Vamp7/Snap23/Stx11/Stxbp2/Vamp2/Cd84	9
GO:0023061	BP	GO:0023061	signal release	19/330	612/28891	9.15304e-05	0.00129287	0.000871813	Rab5a/Gja1/Vamp7/Snap23/Srebf1/Tm7sf3/Ptger4/Gna11/Stx11/Stxbp2/Abcc4/Acvr2a/Vamp2/Rab8b/Ptpn23/Slc38a2/Cpt1a/Syt13/Ifng	19
GO:0071417	BP	GO:0071417	cellular response to organonitrogen compound	21/330	719/28891	9.31393e-05	0.00131104	0.000884068	Ptpra/Ptprj/Cxcr4/Gja1/Fyn/Rab8a/Srebf1/Atp2b1/Gna11/Grb2/Hsp90b1/Ezr/Tyk2/Vamp2/Atp7a/Gnai3/Ncstn/Abcc1/Adcy6/Rab10/Gnai2	21
GO:0018108	BP	GO:0018108	peptidyl-tyrosine phosphorylation	13/330	322/28891	9.55946e-05	0.00134096	0.000904245	Ifnar1/Ptprj/Il6st/Fyn/Erbb4/Ddr1/Acvr1/Ptger4/Tsg101/Ptpn6/Ptprc/Ifng/Il9r	13
GO:0031401	BP	GO:0031401	positive regulation of protein modification process	25/330	945/28891	9.8698e-05	0.00137974	0.000930392	Marchf7/Bmpr2/Notch2/Tollip/Ptprj/Cxcr4/Il6st/Fyn/Erbb4/Ndfip2/Acvr1/Ptger4/Hspa2/Acvr2a/Wbp1l/Fxr1/Ptprc/Aurkb/Ndfip1/Csnk1d/Irgm1/Flot1/Flt3/Ifng/Ccnb1	25
GO:0050854	BP	GO:0050854	regulation of antigen receptor-mediated signaling pathway	6/330	65/28891	9.94501e-05	0.00138549	0.000934272	Ptprj/Ptpn6/Ezr/Gcsam/Ptprc/Kcnn4	6
GO:0032506	BP	GO:0032506	cytokinetic process	5/330	41/28891	0.000100869	0.00140046	0.000944369	Cep55/Chmp4b/Aurkb/Pdcd6ip/Vps4a	5
GO:0018212	BP	GO:0018212	peptidyl-tyrosine modification	13/330	324/28891	0.000101684	0.0014022	0.000945543	Ifnar1/Ptprj/Il6st/Fyn/Erbb4/Ddr1/Acvr1/Ptger4/Tsg101/Ptpn6/Ptprc/Ifng/Il9r	13
GO:0045927	BP	GO:0045927	positive regulation of growth	13/330	324/28891	0.000101684	0.0014022	0.000945543	Bmpr2/Sdcbp/Tgfbr1/Cxcr4/Erbb4/Ptger4/Ezr/Trim32/Trpv2/Rftn1/Flt3/Ccnb1/Il9r	13
GO:0044794	BP	GO:0044794	positive regulation by host of viral process	4/330	22/28891	0.000103921	0.00142128	0.000958405	Zdhhc20/Stom/Ifng/Igf2r	4
GO:1903214	BP	GO:1903214	regulation of protein targeting to mitochondrion	4/330	22/28891	0.000103921	0.00142128	0.000958405	Bag3/Srebf1/Bnip3l/Hspa1l	4
GO:0048708	BP	GO:0048708	astrocyte differentiation	7/330	94/28891	0.000104115	0.00142128	0.000958405	Ifngr1/Il6st/Naglu/Ldlr/Abcc1/Ifng/Ttc21b	7
GO:0050777	BP	GO:0050777	negative regulation of immune response	11/330	239/28891	0.000104852	0.00142537	0.000961162	H2-K1/H2-T23/H2-D1/Tyro3/Pdcd1/Ptpn6/Ptprc/Aurkb/Ndfip1/Lgals9/Cd84	11
GO:0051129	BP	GO:0051129	negative regulation of cellular component organization	22/330	780/28891	0.000105116	0.00142537	0.000961162	H2-K1/Ankrd13a/Sdcbp/Tom1l2/Prkcsh/H2-D1/Abca2/Sema6a/Fyn/H3f3a/Ldlr/Snx3/Ptger4/Hspa2/Bnip3/Aurkb/Pip4p2/Irgm1/Adcy6/Itm2c/Ccnb1/Scfd1	22
GO:0061077	BP	GO:0061077	chaperone-mediated protein folding	6/330	66/28891	0.000108355	0.00146441	0.000987489	St13/Hspa2/Dnajc7/Hspa1l/Hspa1a/Hspa1b	6
GO:0002429	BP	GO:0002429	immune response-activating cell surface receptor signaling pathway	12/330	284/28891	0.000115514	0.001556	0.00104925	Lrrfip2/Ptprj/Naglu/Fyn/Grb2/Ptpn6/Ezr/Gcsam/Ptprc/Kcnn4/Rftn1/Ifng	12
GO:0002831	BP	GO:0002831	regulation of response to biotic stimulus	18/330	573/28891	0.000120709	0.00162061	0.00109282	H2-K1/Lrrfip2/H2-T23/Itch/H2-D1/Naglu/Tyro3/Srebf1/Hmgb2/Aurkb/Ulbp1/Lgals9/Irgm1/Flot1/H2-M3/Rftn1/Ifng/Cd84	18
GO:0002697	BP	GO:0002697	regulation of immune effector process	16/330	473/28891	0.000124268	0.00166143	0.00112034	H2-K1/H2-T23/Ptprj/H2-D1/Vamp7/Bst2/Stxbp2/Ptpn6/Ptprc/Ulbp1/Ndfip1/Lgals9/H2-M3/Ifng/Litaf/Cd84	16
GO:0060333	BP	GO:0060333	type II interferon-mediated signaling pathway	4/330	23/28891	0.000124671	0.00166143	0.00112034	Ifngr1/Tyk2/Irgm1/Ifng	4
GO:0002456	BP	GO:0002456	T cell mediated immunity	9/330	165/28891	0.000124974	0.00166143	0.00112034	H2-K1/H2-T23/H2-D1/Stx11/Crlf2/Ptprc/Ulbp1/H2-M3/Rftn1	9
GO:0043299	BP	GO:0043299	leukocyte degranulation	7/330	97/28891	0.000126915	0.00167963	0.00113262	Vamp7/Snap23/Stx11/Stxbp2/Vamp2/Lgals9/Cd84	7
GO:0002486	BP	GO:0002486	antigen processing and presentation of endogenous peptide antigen via MHC class I via ER pathway, TAP-independent	5/330	43/28891	0.00012717	0.00167963	0.00113262	H2-K1/H2-T23/H2-D1/Ulbp1/H2-M3	5
GO:0050729	BP	GO:0050729	positive regulation of inflammatory response	9/330	167/28891	0.000136922	0.00180259	0.00121553	H2-K1/H2-T23/H2-D1/Vamp7/Il17ra/Ldlr/Ptger4/Abcc1/Ifng	9
GO:0001914	BP	GO:0001914	regulation of T cell mediated cytotoxicity	6/330	69/28891	0.000138923	0.00181716	0.00122536	H2-K1/H2-T23/H2-D1/Ptprc/Ulbp1/H2-M3	6
GO:0061951	BP	GO:0061951	establishment of protein localization to plasma membrane	6/330	69/28891	0.000138923	0.00181716	0.00122536	Atp2c1/Vamp7/Rab8a/Golga7/Vamp3/Vamp2	6
GO:0002695	BP	GO:0002695	negative regulation of leukocyte activation	10/330	206/28891	0.000139463	0.00181839	0.00122619	Marchf7/Itch/Tyro3/Ldlr/Ptpn6/Ndfip1/Lgals9/Pag1/Flt3/Cd84	10
GO:0002484	BP	GO:0002484	antigen processing and presentation of endogenous peptide antigen via MHC class I via ER pathway	5/330	44/28891	0.000142141	0.0018415	0.00124177	H2-K1/H2-T23/H2-D1/Ulbp1/H2-M3	5
GO:0010559	BP	GO:0010559	regulation of glycoprotein biosynthetic process	5/330	44/28891	0.000142141	0.0018415	0.00124177	Abca2/Itm2b/Itm2a/Ncstn/Itm2c	5
GO:0019076	BP	GO:0019076	viral release from host cell	4/330	24/28891	0.000148263	0.00190866	0.00128706	Tsg101/Chmp4b/Vps4a/Arl8b	4
GO:0035891	BP	GO:0035891	exit from host cell	4/330	24/28891	0.000148263	0.00190866	0.00128706	Tsg101/Chmp4b/Vps4a/Arl8b	4
GO:0010975	BP	GO:0010975	regulation of neuron projection development	18/330	583/28891	0.000149455	0.00191793	0.00129331	H2-K1/Bmpr2/Prkcsh/H2-D1/Vamp7/Sema6a/Fyn/Ddr1/Snx3/Scarb2/Ranbp1/Zdhhc15/Trpv2/Ddx56/Adcy6/Tmem106b/Rab21/Itm2c	18
GO:0007040	BP	GO:0007040	lysosome organization	7/330	100/28891	0.000153608	0.00195887	0.00132091	Tmem9/Naglu/Chmp4b/Irgm1/Tmem106b/Chmp1b2/Arl8b	7
GO:0080171	BP	GO:0080171	lytic vacuole organization	7/330	100/28891	0.000153608	0.00195887	0.00132091	Tmem9/Naglu/Chmp4b/Irgm1/Tmem106b/Chmp1b2/Arl8b	7
GO:0045089	BP	GO:0045089	positive regulation of innate immune response	14/330	385/28891	0.000156069	0.00198403	0.00133788	H2-K1/Lrrfip2/H2-T23/H2-D1/Naglu/Tyro3/Srebf1/Hmgb2/Ulbp1/Lgals9/Irgm1/Flot1/H2-M3/Rftn1	14
GO:0002698	BP	GO:0002698	negative regulation of immune effector process	9/330	170/28891	0.000156623	0.00198487	0.00133845	H2-K1/H2-T23/H2-D1/Bst2/Ptpn6/Ptprc/Ndfip1/Lgals9/Cd84	9
GO:0002476	BP	GO:0002476	antigen processing and presentation of endogenous peptide antigen via MHC class Ib	5/330	45/28891	0.000158424	0.00200146	0.00134964	H2-K1/H2-T23/H2-D1/Ulbp1/H2-M3	5
GO:0002768	BP	GO:0002768	immune response-regulating cell surface receptor signaling pathway	12/330	294/28891	0.000159467	0.00200839	0.00135431	Lrrfip2/Ptprj/Naglu/Fyn/Grb2/Ptpn6/Ezr/Gcsam/Ptprc/Kcnn4/Rftn1/Ifng	12
GO:0030167	BP	GO:0030167	proteoglycan catabolic process	3/330	10/28891	0.000166973	0.00208357	0.00140501	Naglu/Gusb/Hgsnat	3
GO:0048280	BP	GO:0048280	vesicle fusion with Golgi apparatus	3/330	10/28891	0.000166973	0.00208357	0.00140501	Vamp7/Vti1b/Yipf4	3
GO:0062042	BP	GO:0062042	regulation of cardiac epithelial to mesenchymal transition	3/330	10/28891	0.000166973	0.00208357	0.00140501	Tgfbr2/Tgfbr1/Acvr1	3
GO:0050728	BP	GO:0050728	negative regulation of inflammatory response	9/330	172/28891	0.000171028	0.00212765	0.00143473	Tyro3/Ldlr/Ptger4/Ptpn6/Fxr1/Ndfip1/Lgals9/Irgm1/Nt5e	9
GO:2001233	BP	GO:2001233	regulation of apoptotic signaling pathway	15/330	437/28891	0.000171888	0.00213184	0.00143755	Marchf7/Bcap31/Tgfbr1/Pdia3/Hyou1/Fyn/Steap3/Acvr1/Trim32/Hmgb2/Ptprc/Gnai3/Itm2c/Gnai2/Il9r	15
GO:0002712	BP	GO:0002712	regulation of B cell mediated immunity	7/330	102/28891	0.000173803	0.00214251	0.00144475	H2-K1/H2-T23/H2-D1/Ptpn6/Ptprc/Ndfip1/Ifng	7
GO:0002889	BP	GO:0002889	regulation of immunoglobulin mediated immune response	7/330	102/28891	0.000173803	0.00214251	0.00144475	H2-K1/H2-T23/H2-D1/Ptpn6/Ptprc/Ndfip1/Ifng	7
GO:1902410	BP	GO:1902410	mitotic cytokinetic process	4/330	25/28891	0.000174922	0.00214979	0.00144966	Cep55/Chmp4b/Pdcd6ip/Vps4a	4
GO:0002428	BP	GO:0002428	antigen processing and presentation of peptide antigen via MHC class Ib	5/330	46/28891	0.000176095	0.00215121	0.00145062	H2-K1/H2-T23/H2-D1/Ulbp1/H2-M3	5
GO:0060390	BP	GO:0060390	regulation of SMAD protein signal transduction	5/330	46/28891	0.000176095	0.00215121	0.00145062	Bmpr2/Tgfbr2/Tgfbr1/Acvr1/Lgals9	5
GO:0045333	BP	GO:0045333	cellular respiration	11/330	254/28891	0.000178646	0.00217584	0.00146723	Ifnar1/Ogdh/Macroh2a1/Bnip3/Atp7a/Etfb/Opn3/Adsl/Ifng/Ccnb1/Mdh2	11
GO:0002757	BP	GO:0002757	immune response-activating signaling pathway	15/330	440/28891	0.000185042	0.00224701	0.00151522	Lrrfip2/Ptprj/Naglu/Fyn/Tyro3/Grb2/Ptpn6/Ezr/Gcsam/Ptprc/Kcnn4/Irgm1/Flot1/Rftn1/Ifng	15
GO:0010506	BP	GO:0010506	regulation of autophagy	12/330	300/28891	0.000192162	0.00232653	0.00156884	Bag3/Rab8a/Tom1/Srebf1/Chmp4b/Bnip3l/Bnip3/Trim32/Gnai3/Irgm1/Ifng/Scfd1	12
GO:0140029	BP	GO:0140029	exocytic process	7/330	104/28891	0.000196091	0.00236706	0.00159617	Vamp7/Snap23/Rab8a/Stx11/Stxbp2/Vamp2/Rab8b	7
GO:0003181	BP	GO:0003181	atrioventricular valve morphogenesis	4/330	26/28891	0.000204873	0.00246576	0.00166272	Bmpr2/Tgfbr2/Naglu/Acvr1	4
GO:0016064	BP	GO:0016064	immunoglobulin mediated immune response	12/330	303/28891	0.000210549	0.00252658	0.00170374	H2-K1/H2-T23/H2-D1/Ighv1-66/Crlf2/Ptpn6/Ptprc/Ndfip1/Ighv1-19/Ighv1-36/Ifng/Il9r	12
GO:0010562	BP	GO:0010562	positive regulation of phosphorus metabolic process	23/330	877/28891	0.000212084	0.00253009	0.0017061	Bmpr2/Notch2/Sdcbp/Ptprj/Cxcr4/Il6st/Fyn/Tyro3/Erbb4/Ddr1/Acvr1/Ptger4/Hspa2/Acvr2a/Fxr1/Ptprc/Aurkb/Csnk1d/Irgm1/Flot1/Flt3/Ifng/Ccnb1	23
GO:0045937	BP	GO:0045937	positive regulation of phosphate metabolic process	23/330	877/28891	0.000212084	0.00253009	0.0017061	Bmpr2/Notch2/Sdcbp/Ptprj/Cxcr4/Il6st/Fyn/Tyro3/Erbb4/Ddr1/Acvr1/Ptger4/Hspa2/Acvr2a/Fxr1/Ptprc/Aurkb/Csnk1d/Irgm1/Flot1/Flt3/Ifng/Ccnb1	23
GO:0042063	BP	GO:0042063	gliogenesis	14/330	397/28891	0.000213875	0.00254399	0.00171548	Ifngr1/Notch2/Ptpra/Ptprj/Cxcr4/Il6st/Abca2/Naglu/Ldlr/Grb2/Ncstn/Abcc1/Ifng/Ttc21b	14
GO:0006885	BP	GO:0006885	regulation of pH	7/330	106/28891	0.000220632	0.00261671	0.00176452	Tmem9/Atp6v0a2/Atp6v0d1/Atp6v1b2/Slc9a8/Slc9a9/Tmem106b	7
GO:0090092	BP	GO:0090092	regulation of transmembrane receptor protein serine/threonine kinase signaling pathway	11/330	261/28891	0.000225913	0.00267155	0.00180149	Prmt1/Bmpr2/Tgfbr2/Notch2/Sdcbp/Tgfbr1/Rbbp7/Acvr1/Acvr1b/Acvr2a/Lgals9	11
GO:0043320	BP	GO:0043320	natural killer cell degranulation	3/330	11/28891	0.000227646	0.00268424	0.00181005	Vamp7/Stx11/Lgals9	3
GO:0019724	BP	GO:0019724	B cell mediated immunity	12/330	306/28891	0.000230414	0.00270903	0.00182677	H2-K1/H2-T23/H2-D1/Ighv1-66/Crlf2/Ptpn6/Ptprc/Ndfip1/Ighv1-19/Ighv1-36/Ifng/Il9r	12
GO:0002764	BP	GO:0002764	immune response-regulating signaling pathway	15/330	450/28891	0.000235389	0.00274676	0.00185221	Lrrfip2/Ptprj/Naglu/Fyn/Tyro3/Grb2/Ptpn6/Ezr/Gcsam/Ptprc/Kcnn4/Irgm1/Flot1/Rftn1/Ifng	15
GO:0001774	BP	GO:0001774	microglial cell activation	5/330	49/28891	0.000238214	0.00274676	0.00185221	Ifngr1/Hspa4/Naglu/Ldlr/Ifng	5
GO:1903018	BP	GO:1903018	regulation of glycoprotein metabolic process	5/330	49/28891	0.000238214	0.00274676	0.00185221	Abca2/Itm2b/Itm2a/Ncstn/Itm2c	5
GO:0032639	BP	GO:0032639	TRAIL production	4/330	27/28891	0.000238349	0.00274676	0.00185221	H2-K1/H2-T23/H2-D1/Tnfrsf8	4
GO:0032679	BP	GO:0032679	regulation of TRAIL production	4/330	27/28891	0.000238349	0.00274676	0.00185221	H2-K1/H2-T23/H2-D1/Tnfrsf8	4
GO:0032759	BP	GO:0032759	positive regulation of TRAIL production	4/330	27/28891	0.000238349	0.00274676	0.00185221	H2-K1/H2-T23/H2-D1/Tnfrsf8	4
GO:1903747	BP	GO:1903747	regulation of establishment of protein localization to mitochondrion	4/330	27/28891	0.000238349	0.00274676	0.00185221	Bag3/Srebf1/Bnip3l/Hspa1l	4
GO:0050852	BP	GO:0050852	T cell receptor signaling pathway	8/330	143/28891	0.000248945	0.00286076	0.00192908	Ptprj/Fyn/Ptpn6/Ezr/Ptprc/Kcnn4/Rftn1/Ifng	8
GO:0017156	BP	GO:0017156	calcium-ion regulated exocytosis	6/330	77/28891	0.00025457	0.00291715	0.00196711	Vamp7/Vamp3/Vamp2/Syt13/Gnai2/Arl8b	6
GO:0048638	BP	GO:0048638	regulation of developmental growth	14/330	405/28891	0.000261933	0.00298808	0.00201494	Bmpr2/Tgfbr2/Tgfbr1/Cxcr4/Gja1/Sema6a/Erbb4/Ptger4/Atrn/Ezr/Trpv2/Flt3/Rab21/Ccnb1	14
GO:0002475	BP	GO:0002475	antigen processing and presentation via MHC class Ib	5/330	50/28891	0.000262229	0.00298808	0.00201494	H2-K1/H2-T23/H2-D1/Ulbp1/H2-M3	5
GO:0050671	BP	GO:0050671	positive regulation of lymphocyte proliferation	9/330	183/28891	0.00027145	0.00308452	0.00207997	H2-K1/H2-T23/Tgfbr2/H2-D1/Il6st/Tyk2/Ptprc/Irgm1/Ifng	9
GO:0003272	BP	GO:0003272	endocardial cushion formation	4/330	28/28891	0.000275585	0.00311411	0.00209992	Tgfbr2/Tgfbr1/Acvr1/Tmem100	4
GO:0045648	BP	GO:0045648	positive regulation of erythrocyte differentiation	4/330	28/28891	0.000275585	0.00311411	0.00209992	Prmt1/Acvr1b/Acvr2a/Hmgb2	4
GO:0031329	BP	GO:0031329	regulation of cellular catabolic process	18/330	614/28891	0.000280195	0.00315743	0.00212914	Syncrip/Bag3/Itch/Abca2/Rab8a/Tom1/Srebf1/Ldlr/Chmp4b/Bnip3l/Bnip3/Trim32/Fxr1/Gnai3/Irgm1/Cpt1a/Ifng/Scfd1	18
GO:0050866	BP	GO:0050866	negative regulation of cell activation	10/330	225/28891	0.000284125	0.00319287	0.00215304	Marchf7/Itch/Tyro3/Ldlr/Ptpn6/Ndfip1/Lgals9/Pag1/Flt3/Cd84	10
GO:0045646	BP	GO:0045646	regulation of erythrocyte differentiation	5/330	51/28891	0.000288037	0.00322792	0.00217667	Prmt1/Acvr1b/Acvr2a/Hmgb2/Rbfox2	5
GO:0016239	BP	GO:0016239	positive regulation of macroautophagy	6/330	79/28891	0.000292815	0.00327245	0.0022067	Bag3/Tom1/Bnip3l/Bnip3/Gnai3/Irgm1	6
GO:0036295	BP	GO:0036295	cellular response to increased oxygen levels	3/330	12/28891	0.000300962	0.00333601	0.00224956	Atp6v0a2/Atp6v0d1/Atp6v1a	3
GO:0046753	BP	GO:0046753	non-lytic viral release	3/330	12/28891	0.000300962	0.00333601	0.00224956	Chmp4b/Vps4a/Arl8b	3
GO:2000562	BP	GO:2000562	negative regulation of CD4-positive, alpha-beta T cell proliferation	3/330	12/28891	0.000300962	0.00333601	0.00224956	Itch/Ndfip1/Lgals9	3
GO:0099003	BP	GO:0099003	vesicle-mediated transport in synapse	11/330	270/28891	0.000301865	0.00333692	0.00225017	Rab5a/Snap23/Rab8a/Atp6v1e1/Atp6v0d1/Atp6v1b2/Atp6v1a/Stx11/Atp6v1d/Vamp2/Clcn3	11
GO:0032946	BP	GO:0032946	positive regulation of mononuclear cell proliferation	9/330	186/28891	0.000306034	0.00337384	0.00227507	H2-K1/H2-T23/Tgfbr2/H2-D1/Il6st/Tyk2/Ptprc/Irgm1/Ifng	9
GO:0032814	BP	GO:0032814	regulation of natural killer cell activation	6/330	80/28891	0.000313555	0.00342392	0.00230884	H2-K1/H2-T23/H2-D1/Tyk2/Ulbp1/Lgals9	6
GO:0003197	BP	GO:0003197	endocardial cushion development	5/330	52/28891	0.000315726	0.00342392	0.00230884	Bmpr2/Tgfbr2/Tgfbr1/Acvr1/Tmem100	5
GO:0045332	BP	GO:0045332	phospholipid translocation	5/330	52/28891	0.000315726	0.00342392	0.00230884	Abcb1b/Atp11c/Kcnn4/Atp8a1/Abcc1	5
GO:0060043	BP	GO:0060043	regulation of cardiac muscle cell proliferation	5/330	52/28891	0.000315726	0.00342392	0.00230884	Tgfbr2/Tgfbr1/Gja1/Erbb4/Ccnb1	5
GO:0002477	BP	GO:0002477	antigen processing and presentation of exogenous peptide antigen via MHC class Ib	4/330	29/28891	0.000316817	0.00342392	0.00230884	H2-K1/H2-T23/H2-D1/H2-M3	4
GO:0015868	BP	GO:0015868	purine ribonucleotide transport	4/330	29/28891	0.000316817	0.00342392	0.00230884	Gja1/Abcc4/Lrrc8c/Abcc5	4
GO:0051503	BP	GO:0051503	adenine nucleotide transport	4/330	29/28891	0.000316817	0.00342392	0.00230884	Gja1/Abcc4/Lrrc8c/Abcc5	4
GO:0031346	BP	GO:0031346	positive regulation of cell projection organization	15/330	463/28891	0.000318231	0.00342392	0.00230884	Bmpr2/Tgfbr1/Vamp7/Fyn/Ddr1/Snx3/Scarb2/Ranbp1/Rab8b/Atp7a/Zdhhc15/Trpv2/Ddx56/Tmem106b/Rab21	15
GO:0043409	BP	GO:0043409	negative regulation of MAPK cascade	9/330	187/28891	0.000318342	0.00342392	0.00230884	Prmt1/Rnf149/Ptprj/Itch/Sema6a/Ptpn6/Ezr/Ptprc/Spry4	9
GO:0002833	BP	GO:0002833	positive regulation of response to biotic stimulus	14/330	413/28891	0.000318994	0.00342392	0.00230884	H2-K1/Lrrfip2/H2-T23/H2-D1/Naglu/Tyro3/Srebf1/Hmgb2/Ulbp1/Lgals9/Irgm1/Flot1/H2-M3/Rftn1	14
GO:1901652	BP	GO:1901652	response to peptide	15/330	464/28891	0.000325532	0.00348013	0.00234675	Ptpra/Ptprj/Gja1/Cacybp/Fyn/Rab8a/Srebf1/Atp2b1/Grb2/Tyk2/Vamp2/Abcc1/Adcy6/Rab10/Gnai2	15
GO:0031343	BP	GO:0031343	positive regulation of cell killing	7/330	113/28891	0.000326715	0.00348013	0.00234675	H2-K1/H2-T23/H2-D1/Ptprc/Ulbp1/H2-M3/Ifng	7
GO:1902115	BP	GO:1902115	regulation of organelle assembly	10/330	229/28891	0.000326797	0.00348013	0.00234675	Stam/Sdcbp/Tsg101/Chmp4b/Ezr/Pdcd6ip/Msn/Hspa1a/Hspa1b/Scfd1	10
GO:0006626	BP	GO:0006626	protein targeting to mitochondrion	6/330	81/28891	0.000335429	0.00356273	0.00240244	Bcap31/Bag3/Hspa4/Srebf1/Bnip3l/Hspa1l	6
GO:0099504	BP	GO:0099504	synaptic vesicle cycle	10/330	230/28891	0.000338263	0.00358347	0.00241643	Rab5a/Snap23/Atp6v1e1/Atp6v0d1/Atp6v1b2/Atp6v1a/Stx11/Atp6v1d/Vamp2/Clcn3	10
GO:0031623	BP	GO:0031623	receptor internalization	8/330	150/28891	0.000343907	0.0036212	0.00244187	Hgs/Ankrd13a/Rab5a/Sdcbp/Itch/Grb2/Ezr/Flot1	8
GO:0090316	BP	GO:0090316	positive regulation of intracellular protein transport	8/330	150/28891	0.000343907	0.0036212	0.00244187	Bcap31/Bag3/Fyn/Anp32b/Stom/Vamp2/Hspa1l/Ifng	8
GO:0002269	BP	GO:0002269	leukocyte activation involved in inflammatory response	5/330	53/28891	0.000345385	0.0036212	0.00244187	Ifngr1/Hspa4/Naglu/Ldlr/Ifng	5
GO:0002478	BP	GO:0002478	antigen processing and presentation of exogenous peptide antigen	5/330	53/28891	0.000345385	0.0036212	0.00244187	H2-K1/H2-T23/H2-D1/Tapbp/H2-M3	5
GO:0051051	BP	GO:0051051	negative regulation of transport	16/330	519/28891	0.000350997	0.00367058	0.00247517	Ankrd13a/Sdcbp/Bag3/Abca2/Ndfip2/Srebf1/Snx3/Ptger4/Vamp3/Atp7a/Ndfip1/Snx12/Pip4p2/Lgals9/Gnai2/Cd84	16
GO:0010324	BP	GO:0010324	membrane invagination	6/330	82/28891	0.000358479	0.00373921	0.00252145	Hgs/Vamp7/Timd2/Snx3/Aurkb/Clcn3	6
GO:0001934	BP	GO:0001934	positive regulation of protein phosphorylation	20/330	738/28891	0.00036045	0.00375009	0.00252878	Bmpr2/Notch2/Ptprj/Cxcr4/Il6st/Fyn/Erbb4/Acvr1/Ptger4/Hspa2/Acvr2a/Fxr1/Ptprc/Aurkb/Csnk1d/Irgm1/Flot1/Flt3/Ifng/Ccnb1	20
GO:0003171	BP	GO:0003171	atrioventricular valve development	4/330	30/28891	0.000362287	0.00375009	0.00252878	Bmpr2/Tgfbr2/Naglu/Acvr1	4
GO:0015865	BP	GO:0015865	purine nucleotide transport	4/330	30/28891	0.000362287	0.00375009	0.00252878	Gja1/Abcc4/Lrrc8c/Abcc5	4
GO:0051702	BP	GO:0051702	biological process involved in interaction with symbiont	7/330	115/28891	0.000363542	0.00375352	0.0025311	Zdhhc20/Rab5a/Psmc3/Stom/Ddx56/Ifng/Igf2r	7
GO:0003179	BP	GO:0003179	heart valve morphogenesis	5/330	54/28891	0.000377103	0.00388368	0.00261887	Bmpr2/Tgfbr2/Notch2/Naglu/Acvr1	5
GO:0048844	BP	GO:0048844	artery morphogenesis	6/330	83/28891	0.00038275	0.00392619	0.00264753	Bmpr2/Tgfbr2/Tgfbr1/Naglu/Ldlr/Ptger4	6
GO:0032642	BP	GO:0032642	regulation of chemokine production	7/330	116/28891	0.000383161	0.00392619	0.00264753	Il17ra/Trim32/Lgals9/Mcoln2/Ifng/Sigirr/Cd84	7
GO:0010561	BP	GO:0010561	negative regulation of glycoprotein biosynthetic process	3/330	13/28891	0.000387946	0.00396523	0.00267386	Itm2b/Itm2a/Itm2c	3
GO:0006470	BP	GO:0006470	protein dephosphorylation	10/330	235/28891	0.000400749	0.00408583	0.00275518	Ptpra/Ptprj/Hsp90b1/Ptpn6/Ppp2r2a/Ptprc/Ptpn23/Ctdsp1/Ptp4a1/Gnai2	10
GO:0045088	BP	GO:0045088	regulation of innate immune response	15/330	474/28891	0.000406841	0.00413758	0.00279008	H2-K1/Lrrfip2/H2-T23/H2-D1/Naglu/Tyro3/Srebf1/Hmgb2/Aurkb/Ulbp1/Lgals9/Irgm1/Flot1/H2-M3/Rftn1	15
GO:0002699	BP	GO:0002699	positive regulation of immune effector process	12/330	326/28891	0.000408151	0.00414054	0.00279208	H2-K1/H2-T23/Ptprj/H2-D1/Vamp7/Stxbp2/Ptpn6/Ptprc/Ulbp1/H2-M3/Ifng/Cd84	12
GO:0050853	BP	GO:0050853	B cell receptor signaling pathway	5/330	55/28891	0.000410972	0.00414847	0.00279742	Grb2/Ptpn6/Gcsam/Ptprc/Rftn1	5
GO:0051353	BP	GO:0051353	positive regulation of oxidoreductase activity	5/330	55/28891	0.000410972	0.00414847	0.00279742	Atp7a/Lgals9/Gnai3/Gnai2/Ifng	5
GO:0032367	BP	GO:0032367	intracellular cholesterol transport	4/330	31/28891	0.000412239	0.00415097	0.0027991	Abca2/Ldlr/Vps4a/Arl8b	4
GO:0002822	BP	GO:0002822	regulation of adaptive immune response based on somatic recombination of immune receptors built from immunoglobulin superfamily domains	10/330	236/28891	0.000414333	0.00416174	0.00280637	H2-K1/H2-T23/H2-D1/Ptpn6/Tyk2/Ptprc/Ulbp1/Ndfip1/H2-M3/Ifng	10
GO:0016241	BP	GO:0016241	regulation of macroautophagy	7/330	118/28891	0.000424939	0.00425777	0.00287112	Bag3/Tom1/Bnip3l/Bnip3/Gnai3/Irgm1/Scfd1	7
GO:0014070	BP	GO:0014070	response to organic cyclic compound	22/330	863/28891	0.000426198	0.00425989	0.00287255	Calr/Tgfbr2/Tgfbr1/Pdia3/Cxcr4/Naglu/Adgrl3/Gna11/Hsp90b1/Adcy3/Ezr/Ranbp1/Ppp2r2a/Hmgb2/Gnai3/Flot1/Ncstn/Rbfox2/Rftn1/Msn/Adcy6/Nt5e	22
GO:0051604	BP	GO:0051604	protein maturation	16/330	529/28891	0.000432079	0.00430808	0.00290505	Calr/Pdia3/Hspa4/St13/Naglu/Hspa4l/Hspa2/Hsp90b1/Pgk1/Dnajc7/Snx12/Ldlrad3/Ncstn/Hspa1l/Hspa1a/Hspa1b	16
GO:0030855	BP	GO:0030855	epithelial cell differentiation	20/330	750/28891	0.000441856	0.00439196	0.00296161	Krt76/Bmpr2/Notch2/Tgfbr1/Cxcr4/Gja1/Abcb1b/Il6st/Erbb4/Gm5414/Ugcg/Acvr1/Macroh2a1/Tsg101/Ezr/Spint2/Opn3/Msn/Tmem100/Ifng	20
GO:0046777	BP	GO:0046777	protein autophosphorylation	10/330	238/28891	0.000442651	0.00439196	0.00296161	Csnk1g3/Tgfbr1/Fyn/Tyro3/Csnk1g1/Erbb4/Ddr1/Acvr1b/Ptprc/Flt3	10
GO:0042531	BP	GO:0042531	positive regulation of tyrosine phosphorylation of STAT protein	5/330	56/28891	0.000447086	0.00441452	0.00297683	Il6st/Fyn/Erbb4/Ptger4/Ifng	5
GO:1903900	BP	GO:1903900	regulation of viral life cycle	8/330	156/28891	0.000447095	0.00441452	0.00297683	Tyro3/Bst2/Top2b/Snx3/Ifitm3/Tsg101/Ifitm2/Vps4a	8
GO:0032722	BP	GO:0032722	positive regulation of chemokine production	6/330	86/28891	0.000463339	0.00454825	0.00306701	Il17ra/Trim32/Lgals9/Mcoln2/Ifng/Cd84	6
GO:0031341	BP	GO:0031341	regulation of cell killing	8/330	157/28891	0.000466509	0.00454825	0.00306701	H2-K1/H2-T23/H2-D1/Ptprc/Ulbp1/Lgals9/H2-M3/Ifng	8
GO:0035455	BP	GO:0035455	response to interferon-alpha	4/330	32/28891	0.000466919	0.00454825	0.00306701	Ifnar1/Bst2/Ifitm3/Ifitm2	4
GO:0060317	BP	GO:0060317	cardiac epithelial to mesenchymal transition	4/330	32/28891	0.000466919	0.00454825	0.00306701	Tgfbr2/Tgfbr1/Acvr1/Tmem100	4
GO:1903146	BP	GO:1903146	regulation of autophagy of mitochondrion	4/330	32/28891	0.000466919	0.00454825	0.00306701	Srebf1/Bnip3l/Bnip3/Irgm1	4
GO:0016311	BP	GO:0016311	dephosphorylation	12/330	331/28891	0.000467348	0.00454825	0.00306701	Ptpra/Ptprj/Hsp90b1/Ptpn6/Ppp2r2a/Ptprc/Ptpn23/Pip4p2/Ctdsp1/Ptp4a1/Gnai2/Ifng	12
GO:0001911	BP	GO:0001911	negative regulation of leukocyte mediated cytotoxicity	5/330	57/28891	0.00048554	0.0046972	0.00316744	H2-K1/H2-T23/H2-D1/Ptprc/Lgals9	5
GO:0002706	BP	GO:0002706	regulation of lymphocyte mediated immunity	10/330	241/28891	0.00048813	0.0046972	0.00316744	H2-K1/H2-T23/H2-D1/Ptpn6/Ptprc/Ulbp1/Ndfip1/Lgals9/H2-M3/Ifng	10
GO:0003183	BP	GO:0003183	mitral valve morphogenesis	3/330	14/28891	0.00048958	0.0046972	0.00316744	Bmpr2/Naglu/Acvr1	3
GO:0036258	BP	GO:0036258	multivesicular body assembly	3/330	14/28891	0.00048958	0.0046972	0.00316744	Chmp4b/Vps4a/Chmp1b2	3
GO:0036296	BP	GO:0036296	response to increased oxygen levels	3/330	14/28891	0.00048958	0.0046972	0.00316744	Atp6v0a2/Atp6v0d1/Atp6v1a	3
GO:0097577	BP	GO:0097577	sequestering of iron ion	3/330	14/28891	0.00048958	0.0046972	0.00316744	Ftl1/Naglu/Fth1	3
GO:0030301	BP	GO:0030301	cholesterol transport	7/330	121/28891	0.00049435	0.0047207	0.00318329	Abca2/Ldlr/Stard3/Stx12/Stard3nl/Vps4a/Arl8b	7
GO:0060840	BP	GO:0060840	artery development	7/330	121/28891	0.00049435	0.0047207	0.00318329	Bmpr2/Tgfbr2/Tgfbr1/Cxcr4/Naglu/Ldlr/Ptger4	7
GO:0097191	BP	GO:0097191	extrinsic apoptotic signaling pathway	10/330	242/28891	0.000504125	0.00480277	0.00323863	Tgfbr1/Bag3/Pdia3/Fyn/Acvr1/Acvr1b/Hmgb2/Ptprc/Itm2c/Ifng	10
GO:0051701	BP	GO:0051701	biological process involved in interaction with host	8/330	159/28891	0.000507389	0.00482256	0.00325198	Tmprss11e/Snx3/Ifitm3/Tsg101/Ifitm2/Chmp4b/Vps4a/Arl8b	8
GO:0032102	BP	GO:0032102	negative regulation of response to external stimulus	15/330	485/28891	0.000515838	0.00489144	0.00329843	H2-K1/H2-T23/Itch/H2-D1/Sema6a/Tyro3/Ldlr/Ptger4/Ptpn6/Fxr1/Aurkb/Ndfip1/Lgals9/Irgm1/Nt5e	15
GO:0032816	BP	GO:0032816	positive regulation of natural killer cell activation	5/330	58/28891	0.00052643	0.00496872	0.00335054	H2-K1/H2-T23/H2-D1/Tyk2/Ulbp1	5
GO:0061900	BP	GO:0061900	glial cell activation	5/330	58/28891	0.00052643	0.00496872	0.00335054	Ifngr1/Hspa4/Naglu/Ldlr/Ifng	5
GO:0010508	BP	GO:0010508	positive regulation of autophagy	8/330	160/28891	0.00052889	0.00498038	0.0033584	Bag3/Tom1/Bnip3l/Bnip3/Trim32/Gnai3/Irgm1/Ifng	8
GO:0033993	BP	GO:0033993	response to lipid	23/330	937/28891	0.000533984	0.00501674	0.00338292	Calr/Tgfbr2/Tgfbr1/Ifnar1/Pdia3/Naglu/Ldlr/Ptger4/Scamp3/Adcy3/Cdc73/Ranbp1/Hmgb2/Lgals9/Irgm1/Rbfox2/Hadhb/Msn/Adcy6/Ifng/Igf2r/Litaf/Cd84	23
GO:0051960	BP	GO:0051960	regulation of nervous system development	17/330	595/28891	0.00054939	0.00514958	0.0034725	Bmpr2/Notch2/Ptpra/Cxcr4/Il6st/Vamp7/Sema6a/Ldlr/Adgrl3/Trim32/Fxr1/Hmgb2/Trpv2/Ctdsp1/Adgre5/Rab21/Ifng	17
GO:1903305	BP	GO:1903305	regulation of regulated secretory pathway	8/330	161/28891	0.000551123	0.00515395	0.00347544	Rab5a/Vamp7/Stxbp2/Vamp2/Lgals9/Syt13/Gnai2/Cd84	8
GO:0042147	BP	GO:0042147	retrograde transport, endosome to Golgi	6/330	89/28891	0.00055657	0.00516863	0.00348534	Vti1b/Snx3/Gosr1/Vamp3/Snx12/Rab6b	6
GO:0042269	BP	GO:0042269	regulation of natural killer cell mediated cytotoxicity	6/330	89/28891	0.00055657	0.00516863	0.00348534	H2-K1/H2-T23/H2-D1/Ulbp1/Lgals9/H2-M3	6
GO:0015931	BP	GO:0015931	nucleobase-containing compound transport	9/330	202/28891	0.000557775	0.00516863	0.00348534	Tgfbr2/Gja1/Abcc4/Flot1/Abcc1/Slc35a4/Rftn1/Lrrc8c/Abcc5	9
GO:0070665	BP	GO:0070665	positive regulation of leukocyte proliferation	9/330	202/28891	0.000557775	0.00516863	0.00348534	H2-K1/H2-T23/Tgfbr2/H2-D1/Il6st/Tyk2/Ptprc/Irgm1/Ifng	9
GO:0006888	BP	GO:0006888	endoplasmic reticulum to Golgi vesicle-mediated transport	7/330	124/28891	0.000572508	0.00528109	0.00356118	Bcap31/Vamp7/Hyou1/Gosr1/Bcap29/Yipf4/Scfd1	7
GO:0015918	BP	GO:0015918	sterol transport	7/330	124/28891	0.000572508	0.00528109	0.00356118	Abca2/Ldlr/Stard3/Stx12/Stard3nl/Vps4a/Arl8b	7
GO:0021700	BP	GO:0021700	developmental maturation	13/330	389/28891	0.000591156	0.0054257	0.00365869	Zdhhc20/Gja1/Erbb4/Atp6v1e1/H3f3a/Atp6v0d1/Atp6v1b2/Atp6v1a/Atp6v1d/Zdhhc15/Clcn3/Ap1m1/Ccnb1	13
GO:0032366	BP	GO:0032366	intracellular sterol transport	4/330	34/28891	0.000591451	0.0054257	0.00365869	Abca2/Ldlr/Vps4a/Arl8b	4
GO:0043588	BP	GO:0043588	skin development	12/330	340/28891	0.000592185	0.0054257	0.00365869	Tnfrsf19/Krt76/Abcb6/Naglu/Gm5414/Tmprss11f/Ugcg/Acvr1b/Macroh2a1/Tsg101/Atp7a/Opn3	12
GO:0003174	BP	GO:0003174	mitral valve development	3/330	15/28891	0.000606811	0.00551006	0.00371558	Bmpr2/Naglu/Acvr1	3
GO:0003198	BP	GO:0003198	epithelial to mesenchymal transition involved in endocardial cushion formation	3/330	15/28891	0.000606811	0.00551006	0.00371558	Tgfbr2/Tgfbr1/Tmem100	3
GO:0036257	BP	GO:0036257	multivesicular body organization	3/330	15/28891	0.000606811	0.00551006	0.00371558	Chmp4b/Vps4a/Chmp1b2	3
GO:1905666	BP	GO:1905666	regulation of protein localization to endosome	3/330	15/28891	0.000606811	0.00551006	0.00371558	Ankrd13a/Ezr/Msn	3
GO:0050767	BP	GO:0050767	regulation of neurogenesis	15/330	494/28891	0.000622731	0.00564203	0.00380457	Bmpr2/Notch2/Ptpra/Cxcr4/Il6st/Vamp7/Sema6a/Ldlr/Trim32/Fxr1/Hmgb2/Trpv2/Ctdsp1/Rab21/Ifng	15
GO:0032602	BP	GO:0032602	chemokine production	7/330	126/28891	0.000629851	0.00569385	0.00383951	Il17ra/Trim32/Lgals9/Mcoln2/Ifng/Sigirr/Cd84	7
GO:0071375	BP	GO:0071375	cellular response to peptide hormone stimulus	11/330	296/28891	0.0006514	0.0058756	0.00396207	Ptpra/Ptprj/Rab8a/Srebf1/Atp2b1/Grb2/Tyk2/Vamp2/Adcy6/Rab10/Gnai2	11
GO:0032649	BP	GO:0032649	regulation of type II interferon production	7/330	127/28891	0.000660182	0.00592816	0.00399751	Ifnar1/Tyk2/Ulbp1/Lgals9/Irgm1/H2-M3/Flt3	7
GO:0050764	BP	GO:0050764	regulation of phagocytosis	7/330	127/28891	0.000660182	0.00592816	0.00399751	Calr/Ptprj/Snx3/Ptprc/Il2rg/Pip4p2/Ifng	7
GO:0032819	BP	GO:0032819	positive regulation of natural killer cell proliferation	4/330	35/28891	0.000661804	0.00592816	0.00399751	H2-K1/H2-T23/H2-D1/Tyk2	4
GO:0002715	BP	GO:0002715	regulation of natural killer cell mediated immunity	6/330	92/28891	0.000663757	0.00592816	0.00399751	H2-K1/H2-T23/H2-D1/Ulbp1/Lgals9/H2-M3	6
GO:0098739	BP	GO:0098739	import across plasma membrane	9/330	207/28891	0.000664513	0.00592816	0.00399751	Fyn/Slc38a1/Trpv2/Slc38a2/Abcc1/Slc9a9/Slc12a7/Ifng/Lrrc8c	9
GO:0002824	BP	GO:0002824	positive regulation of adaptive immune response based on somatic recombination of immune receptors built from immunoglobulin superfamily domains	8/330	166/28891	0.000673917	0.0059989	0.00404521	H2-K1/H2-T23/H2-D1/Tyk2/Ptprc/Ulbp1/H2-M3/Ifng	8
GO:0007259	BP	GO:0007259	receptor signaling pathway via JAK-STAT	9/330	208/28891	0.000687742	0.00610859	0.00411918	Hgs/Ifnar1/Il6st/Fyn/Erbb4/Ptger4/Tyk2/Ptprc/Ifng	9
GO:0002819	BP	GO:0002819	regulation of adaptive immune response	10/330	252/28891	0.000689376	0.00610977	0.00411997	H2-K1/H2-T23/H2-D1/Ptpn6/Tyk2/Ptprc/Ulbp1/Ndfip1/H2-M3/Ifng	10
GO:0002711	BP	GO:0002711	positive regulation of T cell mediated immunity	6/330	93/28891	0.000702822	0.00621539	0.0041912	H2-K1/H2-T23/H2-D1/Ptprc/Ulbp1/H2-M3	6
GO:2001234	BP	GO:2001234	negative regulation of apoptotic signaling pathway	10/330	253/28891	0.000710641	0.00627091	0.00422864	Marchf7/Tgfbr1/Hyou1/Fyn/Acvr1/Trim32/Hmgb2/Gnai3/Gnai2/Il9r	10
GO:0031342	BP	GO:0031342	negative regulation of cell killing	5/330	62/28891	0.000716327	0.0063074	0.00425324	H2-K1/H2-T23/H2-D1/Ptprc/Lgals9	5
GO:2000377	BP	GO:2000377	regulation of reactive oxygen species metabolic process	8/330	168/28891	0.00072882	0.00640355	0.00431808	Tgfbr2/Fyn/Ptger4/Grb2/Bnip3/Gnai3/Clcn3/Gnai2	8
GO:0002396	BP	GO:0002396	MHC protein complex assembly	3/330	16/28891	0.000740546	0.00643705	0.00434067	Calr/Pdia3/Tapbp	3
GO:0002501	BP	GO:0002501	peptide antigen assembly with MHC protein complex	3/330	16/28891	0.000740546	0.00643705	0.00434067	Calr/Pdia3/Tapbp	3
GO:0032511	BP	GO:0032511	late endosome to vacuole transport via multivesicular body sorting pathway	3/330	16/28891	0.000740546	0.00643705	0.00434067	Stam/Chmp4b/Ptpn23	3
GO:0046642	BP	GO:0046642	negative regulation of alpha-beta T cell proliferation	3/330	16/28891	0.000740546	0.00643705	0.00434067	Itch/Ndfip1/Lgals9	3
GO:1903019	BP	GO:1903019	negative regulation of glycoprotein metabolic process	3/330	16/28891	0.000740546	0.00643705	0.00434067	Itm2b/Itm2a/Itm2c	3
GO:0015980	BP	GO:0015980	energy derivation by oxidation of organic compounds	12/330	350/28891	0.000762621	0.0066148	0.00446053	Ifnar1/Il6st/Ogdh/Macroh2a1/Bnip3/Atp7a/Etfb/Opn3/Adsl/Ifng/Ccnb1/Mdh2	12
GO:0045954	BP	GO:0045954	positive regulation of natural killer cell mediated cytotoxicity	5/330	63/28891	0.000770891	0.00667231	0.00449931	H2-K1/H2-T23/H2-D1/Ulbp1/H2-M3	5
GO:0060395	BP	GO:0060395	SMAD protein signal transduction	6/330	95/28891	0.000786272	0.00679099	0.00457934	Lnpep/Bmpr2/Tgfbr2/Tgfbr1/Acvr1/Lgals9	6
GO:0010720	BP	GO:0010720	positive regulation of cell development	16/330	560/28891	0.000793678	0.00684043	0.00461268	Bmpr2/Tgfbr2/Notch2/Ptpra/Cxcr4/Gja1/Il6st/Vamp7/Atp11c/Trim32/Ptprc/Il2rg/Trpv2/Lgals9/Rab21/Ifng	16
GO:0072593	BP	GO:0072593	reactive oxygen species metabolic process	10/330	257/28891	0.000801186	0.00689054	0.00464647	Tgfbr2/Naglu/Fyn/Ptger4/Grb2/Bnip3/Atp7a/Gnai3/Clcn3/Gnai2	10
GO:0044772	BP	GO:0044772	mitotic cell cycle phase transition	14/330	454/28891	0.000808235	0.0069365	0.00467746	Abcb1b/Acvr1/Acvr1b/Anp32b/Hspa2/Chmp4b/Cdc73/Ptpn6/Aurkb/Ctdsp1/Vps4a/Rhou/Psme2/Ccnb1	14
GO:0048285	BP	GO:0048285	organelle fission	15/330	507/28891	0.000810135	0.00693816	0.00467858	Calr/Tom1l2/Gja1/Top2b/Brox/Hspa2/Chmp4b/Bnip3/Ranbp1/Aurkb/Irgm1/Vps4a/Hspa1a/Hspa1b/Ccnb1	15
GO:0034250	BP	GO:0034250	positive regulation of amide metabolic process	8/330	171/28891	0.000817874	0.00696351	0.00469568	Prmt1/Syncrip/Ifngr1/Abca2/Fxr1/Slc35a4/Ifng/Eef2	8
GO:0032817	BP	GO:0032817	regulation of natural killer cell proliferation	4/330	37/28891	0.000819942	0.00696351	0.00469568	H2-K1/H2-T23/H2-D1/Tyk2	4
GO:0033005	BP	GO:0033005	positive regulation of mast cell activation	4/330	37/28891	0.000819942	0.00696351	0.00469568	Vamp7/Timd2/Stxbp2/Crlf2	4
GO:0097242	BP	GO:0097242	amyloid-beta clearance	4/330	37/28891	0.000819942	0.00696351	0.00469568	Ifngr1/Rab5a/Ldlr/Ifng	4
GO:0044770	BP	GO:0044770	cell cycle phase transition	16/330	562/28891	0.000823964	0.0069831	0.00470888	Abcb1b/Acvr1/Acvr1b/Anp32b/Macroh2a1/Hspa2/Chmp4b/Cdc73/Ptpn6/Ptprc/Aurkb/Ctdsp1/Vps4a/Rhou/Psme2/Ccnb1	16
GO:0009100	BP	GO:0009100	glycoprotein metabolic process	12/330	354/28891	0.00084142	0.00711621	0.00479864	Ganab/Prkcsh/Abca2/Naglu/Itm2b/Itm2a/Gusb/Galnt12/Atp7a/Ncstn/Itm2c/Hgsnat	12
GO:0007178	BP	GO:0007178	transmembrane receptor protein serine/threonine kinase signaling pathway	13/330	405/28891	0.000856288	0.00722693	0.00487331	Prmt1/Lnpep/Bmpr2/Tgfbr2/Notch2/Sdcbp/Tgfbr1/Rbbp7/Acvr1/Acvr1b/Acvr2a/Lgals9/Tmem100	13
GO:0002717	BP	GO:0002717	positive regulation of natural killer cell mediated immunity	5/330	65/28891	0.000889251	0.00743289	0.00501219	H2-K1/H2-T23/H2-D1/Ulbp1/H2-M3	5
GO:0003170	BP	GO:0003170	heart valve development	5/330	65/28891	0.000889251	0.00743289	0.00501219	Bmpr2/Tgfbr2/Notch2/Naglu/Acvr1	5
GO:0006734	BP	GO:0006734	NADH metabolic process	3/330	17/28891	0.000891655	0.00743289	0.00501219	Ogdh/Gpd2/Mdh2	3
GO:0032510	BP	GO:0032510	endosome to lysosome transport via multivesicular body sorting pathway	3/330	17/28891	0.000891655	0.00743289	0.00501219	Chmp4b/Vps4a/Chmp1b2	3
GO:0048302	BP	GO:0048302	regulation of isotype switching to IgG isotypes	3/330	17/28891	0.000891655	0.00743289	0.00501219	Ptprc/Ndfip1/Ifng	3
GO:0060413	BP	GO:0060413	atrial septum morphogenesis	3/330	17/28891	0.000891655	0.00743289	0.00501219	Bmpr2/Notch2/Acvr1	3
GO:0007212	BP	GO:0007212	dopamine receptor signaling pathway	4/330	38/28891	0.000908231	0.00750952	0.00506387	Gna11/Gnai3/Ncstn/Adcy6	4
GO:0019674	BP	GO:0019674	NAD metabolic process	4/330	38/28891	0.000908231	0.00750952	0.00506387	Ogdh/Macroh2a1/Gpd2/Mdh2	4
GO:0045577	BP	GO:0045577	regulation of B cell differentiation	4/330	38/28891	0.000908231	0.00750952	0.00506387	Atp11c/Ptpn6/Il2rg/Flt3	4
GO:1903901	BP	GO:1903901	negative regulation of viral life cycle	4/330	38/28891	0.000908231	0.00750952	0.00506387	Bst2/Snx3/Ifitm3/Ifitm2	4
GO:0002821	BP	GO:0002821	positive regulation of adaptive immune response	8/330	174/28891	0.000915465	0.00753869	0.00508353	H2-K1/H2-T23/H2-D1/Tyk2/Ptprc/Ulbp1/H2-M3/Ifng	8
GO:0051250	BP	GO:0051250	negative regulation of lymphocyte activation	8/330	174/28891	0.000915465	0.00753869	0.00508353	Marchf7/Itch/Tyro3/Ptpn6/Ndfip1/Lgals9/Pag1/Flt3	8
GO:0002312	BP	GO:0002312	B cell activation involved in immune response	6/330	98/28891	0.00092555	0.00760634	0.00512915	Notch2/Itm2a/Lgals8/Ptprc/Ndfip1/Ifng	6
GO:0010959	BP	GO:0010959	regulation of metal ion transport	14/330	461/28891	0.000935682	0.0076741	0.00517485	Cxcr4/Gja1/Fyn/Tmem168/Atp2b1/Hspa2/Stom/Ptpn6/Vamp2/Atp7a/Trpv2/Gnai2/Ifng/Cd84	14
GO:0099536	BP	GO:0099536	synaptic signaling	23/330	978/28891	0.000948786	0.00776592	0.00523676	Usp8/Lnpep/Rab5a/Ptpra/Snap23/Fyn/Rab8a/Erbb4/Ptger4/Gna11/Slc38a1/Stx11/Stxbp2/Fxr1/Vamp2/Slc38a2/Flot1/Ncstn/Rnf19a/Clcn3/Gnai2/Slc12a7/Ifng	23
GO:0045778	BP	GO:0045778	positive regulation of ossification	5/330	66/28891	0.000953259	0.00777126	0.00524036	Bmpr2/Atp2b1/Acvr1/Ptger4/Acvr2a	5
GO:0060038	BP	GO:0060038	cardiac muscle cell proliferation	5/330	66/28891	0.000953259	0.00777126	0.00524036	Tgfbr2/Tgfbr1/Gja1/Erbb4/Ccnb1	5
GO:0072655	BP	GO:0072655	establishment of protein localization to mitochondrion	6/330	99/28891	0.000975957	0.00794039	0.00535441	Bcap31/Bag3/Hspa4/Srebf1/Bnip3l/Hspa1l	6
GO:0001910	BP	GO:0001910	regulation of leukocyte mediated cytotoxicity	7/330	136/28891	0.000988524	0.00802175	0.00540928	H2-K1/H2-T23/H2-D1/Ptprc/Ulbp1/Lgals9/H2-M3	7
GO:0032869	BP	GO:0032869	cellular response to insulin stimulus	9/330	219/28891	0.000989902	0.00802175	0.00540928	Ptpra/Ptprj/Rab8a/Srebf1/Atp2b1/Grb2/Vamp2/Rab10/Gnai2	9
GO:0003203	BP	GO:0003203	endocardial cushion morphogenesis	4/330	39/28891	0.00100301	0.00809569	0.00545913	Tgfbr2/Tgfbr1/Acvr1/Tmem100	4
GO:0014002	BP	GO:0014002	astrocyte development	4/330	39/28891	0.00100301	0.00809569	0.00545913	Ifngr1/Naglu/Ldlr/Ifng	4
GO:0032633	BP	GO:0032633	interleukin-4 production	5/330	67/28891	0.00102063	0.00822161	0.00554405	H2-K1/H2-T23/Notch2/H2-D1/Ndfip1	5
GO:0007030	BP	GO:0007030	Golgi organization	7/330	137/28891	0.00103175	0.00827843	0.00558236	Vamp7/Vti1b/Naglu/Rab8a/Csnk1d/Rab6b/Yipf4	7
GO:0042157	BP	GO:0042157	lipoprotein metabolic process	7/330	137/28891	0.00103175	0.00827843	0.00558236	Zdhhc20/Golga7/Ldlr/Ugcg/Zdhhc15/Irgm1/Lypla2	7
GO:0035493	BP	GO:0035493	SNARE complex assembly	3/330	18/28891	0.00106097	0.00847944	0.0057179	Vamp7/Vamp3/Vamp2	3
GO:0048291	BP	GO:0048291	isotype switching to IgG isotypes	3/330	18/28891	0.00106097	0.00847944	0.0057179	Ptprc/Ndfip1/Ifng	3
GO:0001912	BP	GO:0001912	positive regulation of leukocyte mediated cytotoxicity	6/330	101/28891	0.00108308	0.00863914	0.0058256	H2-K1/H2-T23/H2-D1/Ptprc/Ulbp1/H2-M3	6
GO:0062237	BP	GO:0062237	protein localization to postsynapse	5/330	68/28891	0.00109147	0.00868901	0.00585923	Snap23/Rab8a/Erbb4/Vamp2/Zdhhc15	5
GO:0007268	BP	GO:0007268	chemical synaptic transmission	22/330	928/28891	0.00110052	0.0087269	0.00588477	Usp8/Lnpep/Rab5a/Ptpra/Snap23/Fyn/Rab8a/Erbb4/Ptger4/Slc38a1/Stx11/Stxbp2/Fxr1/Vamp2/Slc38a2/Flot1/Ncstn/Rnf19a/Clcn3/Gnai2/Slc12a7/Ifng	22
GO:0098916	BP	GO:0098916	anterograde trans-synaptic signaling	22/330	928/28891	0.00110052	0.0087269	0.00588477	Usp8/Lnpep/Rab5a/Ptpra/Snap23/Fyn/Rab8a/Erbb4/Ptger4/Slc38a1/Stx11/Stxbp2/Fxr1/Vamp2/Slc38a2/Flot1/Ncstn/Rnf19a/Clcn3/Gnai2/Slc12a7/Ifng	22
GO:0021782	BP	GO:0021782	glial cell development	7/330	139/28891	0.00112266	0.00888515	0.00599148	Ifngr1/Abca2/Naglu/Ldlr/Grb2/Ncstn/Ifng	7
GO:0002886	BP	GO:0002886	regulation of myeloid leukocyte mediated immunity	6/330	102/28891	0.00113991	0.00896934	0.00604826	H2-K1/H2-T23/H2-D1/Vamp7/Stxbp2/Cd84	6
GO:0032418	BP	GO:0032418	lysosome localization	6/330	102/28891	0.00113991	0.00896934	0.00604826	Vamp7/Snap23/Stxbp2/Tmem106b/Cd84/Arl8b	6
GO:1990849	BP	GO:1990849	vacuolar localization	6/330	102/28891	0.00113991	0.00896934	0.00604826	Vamp7/Snap23/Stxbp2/Tmem106b/Cd84/Arl8b	6
GO:0045619	BP	GO:0045619	regulation of lymphocyte differentiation	9/330	224/28891	0.00115893	0.00910137	0.00613729	Tgfbr2/Atp11c/Ptpn6/Ptprc/Ndfip1/Il2rg/Lgals9/Flt3/Ifng	9
GO:0048524	BP	GO:0048524	positive regulation of viral process	5/330	69/28891	0.00116588	0.00913838	0.00616224	Tyro3/Top2b/Tsg101/Stom/Vps4a	5
GO:0010564	BP	GO:0010564	regulation of cell cycle process	19/330	754/28891	0.00118705	0.00928641	0.00626207	Calr/Tom1l2/Gja1/Acvr1/Anp32b/Macroh2a1/Hspa2/Chmp4b/Cdc73/Ptpn6/Ranbp1/Aurkb/Pdcd6ip/Ctdsp1/Vps4a/Hspa1a/Hspa1b/Psme2/Ccnb1	19
GO:0099537	BP	GO:0099537	trans-synaptic signaling	22/330	935/28891	0.00121058	0.00943511	0.00636234	Usp8/Lnpep/Rab5a/Ptpra/Snap23/Fyn/Rab8a/Erbb4/Ptger4/Slc38a1/Stx11/Stxbp2/Fxr1/Vamp2/Slc38a2/Flot1/Ncstn/Rnf19a/Clcn3/Gnai2/Slc12a7/Ifng	22
GO:0032736	BP	GO:0032736	positive regulation of interleukin-13 production	4/330	41/28891	0.00121302	0.00943511	0.00636234	H2-K1/H2-T23/H2-D1/Il17ra	4
GO:0033006	BP	GO:0033006	regulation of mast cell activation involved in immune response	4/330	41/28891	0.00121302	0.00943511	0.00636234	Vamp7/Stxbp2/Ptpn6/Cd84	4
GO:0032609	BP	GO:0032609	type II interferon production	7/330	141/28891	0.00121973	0.0094692	0.00638533	Ifnar1/Tyk2/Ulbp1/Lgals9/Irgm1/H2-M3/Flt3	7
GO:0006334	BP	GO:0006334	nucleosome assembly	5/330	70/28891	0.00124399	0.00962526	0.00649056	Set/H3c2/H3c14/Anp32b/Macroh2a1	5
GO:0032897	BP	GO:0032897	negative regulation of viral transcription	3/330	19/28891	0.0012493	0.00962526	0.00649056	Ifitm3/Ifitm2/Trim32	3
GO:0051238	BP	GO:0051238	sequestering of metal ion	3/330	19/28891	0.0012493	0.00962526	0.00649056	Ftl1/Naglu/Fth1	3
GO:1902774	BP	GO:1902774	late endosome to lysosome transport	3/330	19/28891	0.0012493	0.00962526	0.00649056	Chmp4b/Vps4a/Arl8b	3
GO:0030177	BP	GO:0030177	positive regulation of Wnt signaling pathway	7/330	142/28891	0.00127067	0.00975298	0.00657669	Usp8/Csnk1g3/Tmem9/Csnk1g1/Cdc73/Csnk1d/Ttc21b	7
GO:0072089	BP	GO:0072089	stem cell proliferation	7/330	142/28891	0.00127067	0.00975298	0.00657669	Tgfbr2/Tgfbr1/Abcb1b/Hmgb2/Znrf3/Ptprc/Irgm1	7
GO:0007420	BP	GO:0007420	brain development	18/330	701/28891	0.00128994	0.00988229	0.00666388	Tgfbr2/Cxcr4/Abcb6/Naglu/Rbbp7/Fyn/Tyro3/Erbb4/Ogdh/Top2b/Anp32b/Atrn/Fxr1/Atp7a/Csnk1d/Rbfox2/Tacc2/Ttc21b	18
GO:0042509	BP	GO:0042509	regulation of tyrosine phosphorylation of STAT protein	5/330	71/28891	0.0013259	0.0101196	0.00682391	Il6st/Fyn/Erbb4/Ptger4/Ifng	5
GO:0098754	BP	GO:0098754	detoxification	5/330	71/28891	0.0013259	0.0101196	0.00682391	Abcb1b/Abcb6/Atp7a/Abcc1/Rdh11	5
GO:0001787	BP	GO:0001787	natural killer cell proliferation	4/330	42/28891	0.00132877	0.0101225	0.00682587	H2-K1/H2-T23/H2-D1/Tyk2	4
GO:1902532	BP	GO:1902532	negative regulation of intracellular signal transduction	16/330	589/28891	0.00133953	0.0101854	0.0068683	Prmt1/Marchf7/Rnf149/Ptprj/Itch/Sema6a/Hyou1/Fyn/Tmem127/Ptpn6/Ezr/Trim32/Ptprc/Irgm1/Litaf/Spry4	16
GO:0002279	BP	GO:0002279	mast cell activation involved in immune response	5/330	72/28891	0.00141171	0.0107143	0.00722491	Vamp7/Snap23/Stxbp2/Ptpn6/Cd84	5
GO:0002832	BP	GO:0002832	negative regulation of response to biotic stimulus	8/330	187/28891	0.00145167	0.0109184	0.00736254	H2-K1/H2-T23/Itch/H2-D1/Tyro3/Aurkb/Lgals9/Irgm1	8
GO:0002335	BP	GO:0002335	mature B cell differentiation	4/330	43/28891	0.00145201	0.0109184	0.00736254	Notch2/Itm2a/Lgals8/Il2rg	4
GO:0097028	BP	GO:0097028	dendritic cell differentiation	4/330	43/28891	0.00145201	0.0109184	0.00736254	Tmem176b/Tgfbr2/Notch2/Flt3	4
GO:0031468	BP	GO:0031468	nuclear membrane reassembly	3/330	20/28891	0.00145739	0.0109184	0.00736254	Brox/Chmp4b/Vps4a	3
GO:1901673	BP	GO:1901673	regulation of mitotic spindle assembly	3/330	20/28891	0.00145739	0.0109184	0.00736254	Chmp4b/Hspa1a/Hspa1b	3
GO:1902004	BP	GO:1902004	positive regulation of amyloid-beta formation	3/330	20/28891	0.00145739	0.0109184	0.00736254	Ifngr1/Abca2/Ifng	3
GO:1905146	BP	GO:1905146	lysosomal protein catabolic process	3/330	20/28891	0.00145739	0.0109184	0.00736254	Usp8/Ldlr/Tmem106b	3
GO:0002253	BP	GO:0002253	activation of immune response	15/330	539/28891	0.00148468	0.0111023	0.00748658	Lrrfip2/Ptprj/Naglu/Fyn/Tyro3/Grb2/Ptpn6/Ezr/Gcsam/Ptprc/Kcnn4/Irgm1/Flot1/Rftn1/Ifng	15
GO:0000910	BP	GO:0000910	cytokinesis	8/330	188/28891	0.00150147	0.0111874	0.00754395	Usp8/Rab35/Cep55/Chmp4b/Aurkb/Septin11/Pdcd6ip/Vps4a	8
GO:0045806	BP	GO:0045806	negative regulation of endocytosis	5/330	73/28891	0.00150155	0.0111874	0.00754395	Ankrd13a/Sdcbp/Abca2/Snx3/Pip4p2	5
GO:0033002	BP	GO:0033002	muscle cell proliferation	10/330	280/28891	0.00152466	0.0113388	0.00764604	Bmpr2/Tgfbr2/Tgfbr1/Gja1/Erbb4/Abcc4/Gnai3/Gnai2/Ifng/Ccnb1	10
GO:0070585	BP	GO:0070585	protein localization to mitochondrion	6/330	108/28891	0.00153036	0.0113604	0.00766062	Bcap31/Bag3/Hspa4/Srebf1/Bnip3l/Hspa1l	6
GO:0050731	BP	GO:0050731	positive regulation of peptidyl-tyrosine phosphorylation	8/330	189/28891	0.00155262	0.0115047	0.0077579	Ptprj/Il6st/Fyn/Erbb4/Acvr1/Ptger4/Ptprc/Ifng	8
GO:0035456	BP	GO:0035456	response to interferon-beta	5/330	74/28891	0.00159553	0.0117797	0.00794336	Ifnar1/Bst2/Ifitm3/Ifitm2/Irgm1	5
GO:1901264	BP	GO:1901264	carbohydrate derivative transport	5/330	74/28891	0.00159553	0.0117797	0.00794336	Gja1/Abcc4/Slc35a4/Lrrc8c/Abcc5	5
GO:0090263	BP	GO:0090263	positive regulation of canonical Wnt signaling pathway	6/330	109/28891	0.00160424	0.0118226	0.00797227	Usp8/Csnk1g3/Tmem9/Csnk1g1/Csnk1d/Ttc21b	6
GO:0050864	BP	GO:0050864	regulation of B cell activation	7/330	148/28891	0.00161224	0.01186	0.00799754	Atp11c/Ptpn6/Ptprc/Ndfip1/Il2rg/Flt3/Ifng	7
GO:0007260	BP	GO:0007260	tyrosine phosphorylation of STAT protein	5/330	75/28891	0.00169376	0.0124372	0.00838672	Il6st/Fyn/Erbb4/Ptger4/Ifng	5
GO:0045637	BP	GO:0045637	regulation of myeloid cell differentiation	9/330	237/28891	0.00170956	0.0125089	0.00843509	Prmt1/Notch2/Acvr1b/Cdc73/Acvr2a/Hmgb2/Ndfip1/Rbfox2/Ifng	9
GO:0006904	BP	GO:0006904	vesicle docking involved in exocytosis	4/330	45/28891	0.00172197	0.0125089	0.00843509	Rab8a/Stxbp2/Vamp2/Rab8b	4
GO:0032365	BP	GO:0032365	intracellular lipid transport	4/330	45/28891	0.00172197	0.0125089	0.00843509	Abca2/Ldlr/Vps4a/Arl8b	4
GO:0032924	BP	GO:0032924	activin receptor signaling pathway	4/330	45/28891	0.00172197	0.0125089	0.00843509	Tgfbr1/Acvr1/Acvr1b/Acvr2a	4
GO:0048147	BP	GO:0048147	negative regulation of fibroblast proliferation	4/330	45/28891	0.00172197	0.0125089	0.00843509	Fth1/Cdc73/Trim32/Ifng	4
GO:2000516	BP	GO:2000516	positive regulation of CD4-positive, alpha-beta T cell activation	4/330	45/28891	0.00172197	0.0125089	0.00843509	Tgfbr2/Il2rg/Irgm1/Ifng	4
GO:0044089	BP	GO:0044089	positive regulation of cellular component biogenesis	15/330	551/28891	0.00183697	0.0133205	0.00898234	Hgs/Stam/Sdcbp/Tgfbr1/Ptprj/Adgrl3/Grb2/Tsg101/Atp7a/Flot1/Pdcd6ip/Adgre5/Msn/Vps4a/Ifng	15
GO:0032656	BP	GO:0032656	regulation of interleukin-13 production	4/330	46/28891	0.0018692	0.0135301	0.00912369	H2-K1/H2-T23/H2-D1/Il17ra	4
GO:0045669	BP	GO:0045669	positive regulation of osteoblast differentiation	5/330	77/28891	0.00190341	0.0137533	0.00927418	Bmpr2/Il6st/Acvr1/Ptger4/Acvr2a	5
GO:0002637	BP	GO:0002637	regulation of immunoglobulin production	6/330	113/28891	0.00192721	0.0138397	0.00933249	H2-K1/H2-T23/H2-D1/Ptprc/Ndfip1/Ifng	6
GO:0030217	BP	GO:0030217	T cell differentiation	11/330	339/28891	0.00193068	0.0138397	0.00933249	Tgfbr2/Wwp1/Ptger4/Ptprc/Atp7a/Il2rg/Lgals9/Ccr9/Flt3/Ifng/Cd3d	11
GO:0007039	BP	GO:0007039	protein catabolic process in the vacuole	3/330	22/28891	0.00193579	0.0138397	0.00933249	Usp8/Ldlr/Tmem106b	3
GO:0010232	BP	GO:0010232	vascular transport	3/330	22/28891	0.00193579	0.0138397	0.00933249	Gja1/Abcb1b/Abcc1	3
GO:0035584	BP	GO:0035584	calcium-mediated signaling using intracellular calcium source	3/330	22/28891	0.00193579	0.0138397	0.00933249	Bcap31/Ptprj/Ptprc	3
GO:0098969	BP	GO:0098969	neurotransmitter receptor transport to postsynaptic membrane	3/330	22/28891	0.00193579	0.0138397	0.00933249	Snap23/Rab8a/Vamp2	3
GO:0051962	BP	GO:0051962	positive regulation of nervous system development	12/330	391/28891	0.0019481	0.0139033	0.00937534	Bmpr2/Notch2/Ptpra/Cxcr4/Il6st/Vamp7/Adgrl3/Trim32/Trpv2/Adgre5/Rab21/Ifng	12
GO:0070972	BP	GO:0070972	protein localization to endoplasmic reticulum	5/330	78/28891	0.00201507	0.0143561	0.00968068	Bcap31/Gja1/Chmp4b/Bcap29/Rab10	5
GO:0032616	BP	GO:0032616	interleukin-13 production	4/330	47/28891	0.00202492	0.014401	0.00971097	H2-K1/H2-T23/H2-D1/Il17ra	4
GO:0048812	BP	GO:0048812	neuron projection morphogenesis	18/330	731/28891	0.00203746	0.0144649	0.00975404	Bmpr2/Cxcr4/Gja1/Vamp7/Sema6a/Fyn/Rab8a/Ddr1/Top2b/Atp7a/Zdhhc15/Ablim1/Trpv2/Flot1/Rbfox2/Tmem106b/Rab10/Rab21	18
GO:0007169	BP	GO:0007169	transmembrane receptor protein tyrosine kinase signaling pathway	16/330	616/28891	0.00210441	0.0149142	0.010057	Hgs/Ptpra/Ptprj/Sema6a/Fyn/Tyro3/Erbb4/Ddr1/Srebf1/Grb2/Tsg101/Tyk2/Flt3/Gnai2/Mvb12b/Spry4	16
GO:0043434	BP	GO:0043434	response to peptide hormone	12/330	396/28891	0.00216278	0.0153012	0.010318	Ptpra/Ptprj/Cacybp/Rab8a/Srebf1/Atp2b1/Grb2/Tyk2/Vamp2/Adcy6/Rab10/Gnai2	12
GO:0000280	BP	GO:0000280	nuclear division	13/330	450/28891	0.00218286	0.0154165	0.0103957	Calr/Tom1l2/Gja1/Top2b/Brox/Hspa2/Chmp4b/Ranbp1/Aurkb/Vps4a/Hspa1a/Hspa1b/Ccnb1	13
GO:0030501	BP	GO:0030501	positive regulation of bone mineralization	4/330	48/28891	0.00218938	0.0154357	0.0104087	Bmpr2/Atp2b1/Acvr1/Acvr2a	4
GO:0045639	BP	GO:0045639	positive regulation of myeloid cell differentiation	6/330	116/28891	0.00220001	0.0154595	0.0104247	Prmt1/Notch2/Acvr1b/Acvr2a/Hmgb2/Ifng	6
GO:0031579	BP	GO:0031579	membrane raft organization	3/330	23/28891	0.00220746	0.0154595	0.0104247	Ptprc/Flot1/Rftn1	3
GO:1903540	BP	GO:1903540	establishment of protein localization to postsynaptic membrane	3/330	23/28891	0.00220746	0.0154595	0.0104247	Snap23/Rab8a/Vamp2	3
GO:0008544	BP	GO:0008544	epidermis development	12/330	397/28891	0.00220795	0.0154595	0.0104247	Tnfrsf19/Krt76/Atp2c1/Naglu/Gm5414/Tmprss11f/Ugcg/Acvr1b/Macroh2a1/Tsg101/Atp7a/Opn3	12
GO:0002714	BP	GO:0002714	positive regulation of B cell mediated immunity	5/330	80/28891	0.00225264	0.0157182	0.0105992	H2-K1/H2-T23/H2-D1/Ptprc/Ifng	5
GO:0002891	BP	GO:0002891	positive regulation of immunoglobulin mediated immune response	5/330	80/28891	0.00225264	0.0157182	0.0105992	H2-K1/H2-T23/H2-D1/Ptprc/Ifng	5
GO:0043473	BP	GO:0043473	pigmentation	6/330	117/28891	0.00229711	0.0160011	0.01079	Krt76/Abcb6/Gna11/Atrn/Atp7a/Ap1m1	6
GO:0006839	BP	GO:0006839	mitochondrial transport	7/330	158/28891	0.00233582	0.0162429	0.010953	Bcap31/Bag3/Hspa4/Srebf1/Bnip3l/Bnip3/Hspa1l	7
GO:0050821	BP	GO:0050821	protein stabilization	8/330	202/28891	0.00235201	0.0163276	0.0110101	Marchf7/Calr/Bag3/Golga7/Stx12/Irgm1/Flot1/Rab21	8
GO:0034205	BP	GO:0034205	amyloid-beta formation	4/330	49/28891	0.00236281	0.0163321	0.0110132	Ifngr1/Abca2/Ncstn/Ifng	4
GO:0050856	BP	GO:0050856	regulation of T cell receptor signaling pathway	4/330	49/28891	0.00236281	0.0163321	0.0110132	Ptprj/Ptpn6/Ezr/Kcnn4	4
GO:0050878	BP	GO:0050878	regulation of body fluid levels	11/330	348/28891	0.00236471	0.0163321	0.0110132	Ptprj/Pdia3/Gja1/Tyro3/Erbb4/Ddr1/Ptger4/Ptpn6/Kcnn4/Adcy6/Gnai2	11
GO:0001701	BP	GO:0001701	in utero embryonic development	15/330	566/28891	0.00237296	0.0163614	0.0110329	Prmt1/Cmip/Tgfbr2/Notch2/Tgfbr1/Prkcsh/Gja1/Psmc3/Acvr1/Acvr1b/Grb2/Spint2/Tmem100/Pitpnb/Ccnb1	15
GO:0042130	BP	GO:0042130	negative regulation of T cell proliferation	5/330	81/28891	0.00237877	0.0163736	0.0110412	Marchf7/Itch/Ptpn6/Ndfip1/Lgals9	5
GO:1901137	BP	GO:1901137	carbohydrate derivative biosynthetic process	16/330	624/28891	0.00239112	0.0164309	0.0110798	Abca2/Itm2b/Ugcg/Itm2a/Ptger4/Adcy3/Galnt12/Pgk1/Atp7a/Ncstn/Adsl/Adcy6/Itm2c/Abcc5/Mdh2/Nt5e	16
GO:0009725	BP	GO:0009725	response to hormone	19/330	804/28891	0.00244595	0.0167793	0.0113147	Lnpep/Calr/Ptpra/Tgfbr1/Ptprj/Cacybp/Rab8a/Srebf1/Atp2b1/Ugcg/Ptger4/Grb2/Hmgb2/Tyk2/Vamp2/Rbfox2/Adcy6/Rab10/Gnai2	19
GO:0046879	BP	GO:0046879	hormone secretion	12/330	403/28891	0.00249549	0.0169611	0.0114373	Gja1/Vamp7/Snap23/Srebf1/Tm7sf3/Ptger4/Gna11/Acvr2a/Vamp2/Rab8b/Cpt1a/Ifng	12
GO:0045807	BP	GO:0045807	positive regulation of endocytosis	8/330	204/28891	0.00249933	0.0169611	0.0114373	Calr/Ptprj/Tsg101/Ptprc/Il2rg/Flot1/Rab21/Ifng	8
GO:0003283	BP	GO:0003283	atrial septum development	3/330	24/28891	0.00250163	0.0169611	0.0114373	Bmpr2/Notch2/Acvr1	3
GO:0018230	BP	GO:0018230	peptidyl-L-cysteine S-palmitoylation	3/330	24/28891	0.00250163	0.0169611	0.0114373	Zdhhc20/Golga7/Zdhhc15	3
GO:0018231	BP	GO:0018231	peptidyl-S-diacylglycerol-L-cysteine biosynthetic process from peptidyl-cysteine	3/330	24/28891	0.00250163	0.0169611	0.0114373	Zdhhc20/Golga7/Zdhhc15	3
GO:0045591	BP	GO:0045591	positive regulation of regulatory T cell differentiation	3/330	24/28891	0.00250163	0.0169611	0.0114373	Il2rg/Lgals9/Ifng	3
GO:0098877	BP	GO:0098877	neurotransmitter receptor transport to plasma membrane	3/330	24/28891	0.00250163	0.0169611	0.0114373	Snap23/Rab8a/Vamp2	3
GO:1902850	BP	GO:1902850	microtubule cytoskeleton organization involved in mitosis	7/330	160/28891	0.00250654	0.0169661	0.0114407	Enkd1/Chmp4b/Aurkb/Tacc2/Hspa1a/Hspa1b/Ccnb1	7
GO:0120039	BP	GO:0120039	plasma membrane bounded cell projection morphogenesis	18/330	746/28891	0.00253087	0.0171023	0.0115325	Bmpr2/Cxcr4/Gja1/Vamp7/Sema6a/Fyn/Rab8a/Ddr1/Top2b/Atp7a/Zdhhc15/Ablim1/Trpv2/Flot1/Rbfox2/Tmem106b/Rab10/Rab21	18
GO:0043467	BP	GO:0043467	regulation of generation of precursor metabolites and energy	7/330	161/28891	0.00259543	0.0175094	0.0118071	Ifnar1/Macroh2a1/Bnip3/Atp7a/Opn3/Ifng/Ccnb1	7
GO:0010817	BP	GO:0010817	regulation of hormone levels	16/330	630/28891	0.00262689	0.0176924	0.0119304	Gja1/Vamp7/Snap23/Naglu/Srebf1/Tm7sf3/Ptger4/Gna11/Hsp90b1/Stard3/Acvr2a/Vamp2/Rab8b/Cpt1a/Rdh11/Ifng	16
GO:0001764	BP	GO:0001764	neuron migration	8/330	206/28891	0.00265378	0.0178439	0.0120326	Cxcr4/Gja1/Sema6a/Fyn/Tyro3/Adgrl3/Lrp12/Top2b	8
GO:0071453	BP	GO:0071453	cellular response to oxygen levels	7/330	162/28891	0.00268671	0.0180356	0.0121618	Hyou1/Atp6v0a2/Atp6v0d1/Atp6v1a/Bnip3l/Bnip3/Pgk1	7
GO:0003013	BP	GO:0003013	circulatory system process	15/330	574/28891	0.00270818	0.0181497	0.0122388	Lnpep/Bmpr2/Ptprj/Cxcr4/Gja1/Abcb1b/Fyn/Srebf1/Atp2b1/Gna11/Rbfox2/Abcc1/Adcy6/Gnai2/Ifng	15
GO:0198738	BP	GO:0198738	cell-cell signaling by wnt	13/330	462/28891	0.00273636	0.0182866	0.0123311	Lrrfip2/Usp8/Rab5a/Csnk1g3/Tmem9/Csnk1g1/Snx3/Cdc73/Znrf3/Ptpn23/Csnk1d/Amfr/Ttc21b	13
GO:0045953	BP	GO:0045953	negative regulation of natural killer cell mediated cytotoxicity	4/330	51/28891	0.00273759	0.0182866	0.0123311	H2-K1/H2-T23/H2-D1/Lgals9	4
GO:0002639	BP	GO:0002639	positive regulation of immunoglobulin production	5/330	84/28891	0.00278796	0.0185756	0.012526	H2-K1/H2-T23/H2-D1/Ptprc/Ifng	5
GO:0048858	BP	GO:0048858	cell projection morphogenesis	18/330	753/28891	0.0027933	0.0185756	0.012526	Bmpr2/Cxcr4/Gja1/Vamp7/Sema6a/Fyn/Rab8a/Ddr1/Top2b/Atp7a/Zdhhc15/Ablim1/Trpv2/Flot1/Rbfox2/Tmem106b/Rab10/Rab21	18
GO:0043269	BP	GO:0043269	regulation of monoatomic ion transport	16/330	634/28891	0.00279456	0.0185756	0.012526	Cxcr4/Gja1/Abcb1b/Fyn/Tmem168/Atp2b1/Hspa2/Stom/Ptpn6/Vamp2/Atp7a/Trpv2/Gnai2/Kcnq5/Ifng/Cd84	16
GO:0050860	BP	GO:0050860	negative regulation of T cell receptor signaling pathway	3/330	25/28891	0.00281891	0.0186764	0.012594	Ptprj/Ptpn6/Ezr	3
GO:1903306	BP	GO:1903306	negative regulation of regulated secretory pathway	3/330	25/28891	0.00281891	0.0186764	0.012594	Lgals9/Gnai2/Cd84	3
GO:0002709	BP	GO:0002709	regulation of T cell mediated immunity	6/330	122/28891	0.00283184	0.0187316	0.0126312	H2-K1/H2-T23/H2-D1/Ptprc/Ulbp1/H2-M3	6
GO:0001944	BP	GO:0001944	vasculature development	19/330	817/28891	0.00291485	0.0191935	0.0129427	Hgs/Bmpr2/Tgfbr2/Notch2/Tgfbr1/Ptprj/Cxcr4/Gja1/Sema6a/Naglu/Ldlr/Acvr1/Anp32b/Lgals8/Ptger4/Pgk1/Atp7a/Tmem100/Ifng	19
GO:0009914	BP	GO:0009914	hormone transport	12/330	411/28891	0.00292565	0.0191935	0.0129427	Gja1/Vamp7/Snap23/Srebf1/Tm7sf3/Ptger4/Gna11/Acvr2a/Vamp2/Rab8b/Cpt1a/Ifng	12
GO:0043112	BP	GO:0043112	receptor metabolic process	5/330	85/28891	0.00293501	0.0191935	0.0129427	Itch/Abca2/Ldlr/Vamp3/Znrf3	5
GO:0055021	BP	GO:0055021	regulation of cardiac muscle tissue growth	5/330	85/28891	0.00293501	0.0191935	0.0129427	Tgfbr2/Tgfbr1/Gja1/Erbb4/Ccnb1	5
GO:0060411	BP	GO:0060411	cardiac septum morphogenesis	5/330	85/28891	0.00293501	0.0191935	0.0129427	Bmpr2/Tgfbr2/Notch2/Tgfbr1/Acvr1	5
GO:0150076	BP	GO:0150076	neuroinflammatory response	5/330	85/28891	0.00293501	0.0191935	0.0129427	Ifngr1/Hspa4/Naglu/Ldlr/Ifng	5
GO:2000379	BP	GO:2000379	positive regulation of reactive oxygen species metabolic process	5/330	85/28891	0.00293501	0.0191935	0.0129427	Tgfbr2/Grb2/Gnai3/Clcn3/Gnai2	5
GO:0002716	BP	GO:0002716	negative regulation of natural killer cell mediated immunity	4/330	52/28891	0.00293942	0.0191935	0.0129427	H2-K1/H2-T23/H2-D1/Lgals9	4
GO:0051225	BP	GO:0051225	spindle assembly	6/330	123/28891	0.00294909	0.0192258	0.0129644	Chmp4b/Aurkb/Csnk1d/Ccdc69/Hspa1a/Hspa1b	6
GO:0032409	BP	GO:0032409	regulation of transporter activity	10/330	307/28891	0.00297225	0.0193458	0.0130454	Gja1/Abcb1b/Tmem168/Ndfip2/Hspa2/Stom/Vamp2/Atp7a/Ndfip1/Ifng	10
GO:0032870	BP	GO:0032870	cellular response to hormone stimulus	15/330	580/28891	0.00298451	0.0193946	0.0130783	Calr/Ptpra/Ptprj/Rab8a/Srebf1/Atp2b1/Ugcg/Ptger4/Grb2/Tyk2/Vamp2/Rbfox2/Adcy6/Rab10/Gnai2	15
GO:0006816	BP	GO:0006816	calcium ion transport	13/330	469/28891	0.00310904	0.0201716	0.0136022	Atp2c1/Cxcr4/Gja1/Fyn/Atp2b1/Hspa2/Ptpn6/Ptprc/Kcnn4/Trpv2/Mcoln2/Gnai2/Cd84	13
GO:0060412	BP	GO:0060412	ventricular septum morphogenesis	4/330	53/28891	0.00315117	0.0203001	0.0136889	Bmpr2/Tgfbr2/Tgfbr1/Acvr1	4
GO:0001813	BP	GO:0001813	regulation of antibody-dependent cellular cytotoxicity	3/330	26/28891	0.00315987	0.0203001	0.0136889	H2-K1/H2-T23/H2-D1	3
GO:0001815	BP	GO:0001815	positive regulation of antibody-dependent cellular cytotoxicity	3/330	26/28891	0.00315987	0.0203001	0.0136889	H2-K1/H2-T23/H2-D1	3
GO:0046782	BP	GO:0046782	regulation of viral transcription	3/330	26/28891	0.00315987	0.0203001	0.0136889	Ifitm3/Ifitm2/Trim32	3
GO:1902993	BP	GO:1902993	positive regulation of amyloid precursor protein catabolic process	3/330	26/28891	0.00315987	0.0203001	0.0136889	Ifngr1/Abca2/Ifng	3
GO:1905475	BP	GO:1905475	regulation of protein localization to membrane	8/330	212/28891	0.00316224	0.0203001	0.0136889	Atp2c1/Vamp7/Vti1b/Fyn/Stom/Ezr/Stx8/Vps4a	8
GO:0060322	BP	GO:0060322	head development	18/330	762/28891	0.00316378	0.0203001	0.0136889	Tgfbr2/Cxcr4/Abcb6/Naglu/Rbbp7/Fyn/Tyro3/Erbb4/Ogdh/Top2b/Anp32b/Atrn/Fxr1/Atp7a/Csnk1d/Rbfox2/Tacc2/Ttc21b	18
GO:0019079	BP	GO:0019079	viral genome replication	6/330	125/28891	0.00319443	0.0204482	0.0137888	Bst2/Top2b/Ifitm3/Ifitm2/Stom/Ddx56	6
GO:0032989	BP	GO:0032989	cellular component morphogenesis	20/330	886/28891	0.00319692	0.0204482	0.0137888	Bmpr2/Cxcr4/Gja1/Vamp7/Abca2/Sema6a/Fyn/Rab8a/Ddr1/Top2b/Atp7a/Slc9a8/Zdhhc15/Ablim1/Trpv2/Flot1/Rbfox2/Tmem106b/Rab10/Rab21	20
GO:0032729	BP	GO:0032729	positive regulation of type II interferon production	5/330	87/28891	0.0032458	0.0207283	0.0139776	Ifnar1/Tyk2/Ulbp1/H2-M3/Flt3	5
GO:1902105	BP	GO:1902105	regulation of leukocyte differentiation	11/330	363/28891	0.00326135	0.0207949	0.0140226	Tmem176b/Tgfbr2/Notch2/Atp11c/Ptpn6/Ptprc/Ndfip1/Il2rg/Lgals9/Flt3/Ifng	11
GO:0090066	BP	GO:0090066	regulation of anatomical structure size	15/330	587/28891	0.00333589	0.0212117	0.0143036	Rab5a/Bmpr2/Gja1/Sema6a/Atp2b1/Grb2/Ezr/Atp7a/Kcnn4/Trpv2/Rbfox2/Adcy6/Rab21/Clcn3/Slc12a7	15
GO:0031400	BP	GO:0031400	negative regulation of protein modification process	13/330	473/28891	0.00333994	0.0212117	0.0143036	Marchf7/Ptprj/Hspa4/Fyn/Macroh2a1/Tsg101/Ptpn6/Ptprc/Ctdsp1/Gnai2/Ifng/Ccnb1/Spry4	13
GO:0032868	BP	GO:0032868	response to insulin	9/330	262/28891	0.0033468	0.0212117	0.0143036	Ptpra/Ptprj/Rab8a/Srebf1/Atp2b1/Grb2/Vamp2/Rab10/Gnai2	9
GO:0019722	BP	GO:0019722	calcium-mediated signaling	8/330	214/28891	0.00334757	0.0212117	0.0143036	Bcap31/Ptprj/Cxcr4/Ptprc/Ccr9/Irgm1/Ccr8/Tmem100	8
GO:0010718	BP	GO:0010718	positive regulation of epithelial to mesenchymal transition	4/330	54/28891	0.0033731	0.0213071	0.0143679	Tgfbr2/Sdcbp/Tgfbr1/Acvr1	4
GO:0098586	BP	GO:0098586	cellular response to virus	4/330	54/28891	0.0033731	0.0213071	0.0143679	Lgals8/Lgals9/Irgm1/Flt3	4
GO:0007009	BP	GO:0007009	plasma membrane organization	7/330	169/28891	0.00339659	0.0214052	0.0144341	Cxcr4/Ugcg/Chmp4b/Ptprc/Flot1/Vps4a/Arl8b	7
GO:0045787	BP	GO:0045787	positive regulation of cell cycle	11/330	365/28891	0.00339915	0.0214052	0.0144341	Calr/Gja1/Anp32b/Macroh2a1/Hspa2/Rps15a/Cdc73/Ranbp1/Trim32/Aurkb/Ccnb1	11
GO:0003281	BP	GO:0003281	ventricular septum development	5/330	88/28891	0.00340976	0.0214057	0.0144344	Bmpr2/Tgfbr2/Tgfbr1/Cxcr4/Acvr1	5
GO:0030500	BP	GO:0030500	regulation of bone mineralization	5/330	88/28891	0.00340976	0.0214057	0.0144344	Bmpr2/Gja1/Atp2b1/Acvr1/Acvr2a	5
GO:0007052	BP	GO:0007052	mitotic spindle organization	6/330	127/28891	0.00345468	0.0216543	0.0146021	Chmp4b/Aurkb/Tacc2/Hspa1a/Hspa1b/Ccnb1	6
GO:0002708	BP	GO:0002708	positive regulation of lymphocyte mediated immunity	7/330	170/28891	0.00350864	0.0219587	0.0148073	H2-K1/H2-T23/H2-D1/Ptprc/Ulbp1/H2-M3/Ifng	7
GO:0002519	BP	GO:0002519	natural killer cell tolerance induction	3/330	27/28891	0.00352506	0.0219601	0.0148083	H2-K1/H2-T23/H2-D1	3
GO:0035809	BP	GO:0035809	regulation of urine volume	3/330	27/28891	0.00352506	0.0219601	0.0148083	Ptger4/Adcy6/Gnai2	3
GO:1901857	BP	GO:1901857	positive regulation of cellular respiration	3/330	27/28891	0.00352506	0.0219601	0.0148083	Ifnar1/Opn3/Ifng	3
GO:0002237	BP	GO:0002237	response to molecule of bacterial origin	12/330	421/28891	0.00354603	0.022057	0.0148736	Ifnar1/Naglu/Ptger4/Cdc73/Hmgb2/Lgals9/Irgm1/H2-M3/Hadhb/Ifng/Litaf/Cd84	12
GO:0007162	BP	GO:0007162	negative regulation of cell adhesion	10/330	315/28891	0.00356535	0.0221433	0.0149318	Marchf7/Itch/Sema6a/Ptpn6/Spint2/Ptprc/Ndfip1/Lgals9/Pag1/Spry4	10
GO:0014855	BP	GO:0014855	striated muscle cell proliferation	5/330	89/28891	0.00357959	0.022164	0.0149458	Tgfbr2/Tgfbr1/Gja1/Erbb4/Ccnb1	5
GO:0034728	BP	GO:0034728	nucleosome organization	5/330	89/28891	0.00357959	0.022164	0.0149458	Set/H3c2/H3c14/Anp32b/Macroh2a1	5
[truncated: 610 more rows]

## Sheet: sti_TA passway gene
	ONTOLOGY	ID	Description	GeneRatio	BgRatio	pvalue	p.adjust	qvalue	geneID	Count
[truncated: 42 more rows]

## Sheet: unsti_results
Accession	Gene	#Spec LF-VECT-unstimu-1	#Spec LF-VECT-unstimu-2	#Spec LF-WT-unstimu-1	#Spec LF-WT-unstimu-2	Description.y
[truncated: 6,383 more rows]

[truncated: 3 more sheets: unsti_all_diff_gene, unsti_passway, unsti_TA passway gene]
